# Supplementary material
Source: PubMed Central journal article supplement (PMC6571059)
Supplement: NIHMS1527097-supplement-1.pdf [file NIHMS1527097-supplement-1.pdf]

**Supplemental Fig. S1.** (A-B) Barplots showing the number of discovered 3'-tRFs (A) or i-tRFs (B) starting at each position (normalized to 100% with reference to the highest peak of the barplot) and the frequency of modification of each position of the mature tRNA. The 'tRNA position' axis is split into domains delineating the D, Anticodon, and T loops, as per the alignments provided by MODOMICS, as well as the -1 nucleotide and the CCA tail. (C) Alluvial plot showing the number of 3'-tRFs identified when allowing no mismatches (left column) or  $\leq 1$  mismatch (right column) when mapping. In (C), the height of each column is proportional to the number of tRFs and the columns are segmented to show the portion of the tRFs that are exclusive to tRNA space and ambiguous, respectively. The gray areas connecting the columns of (C) show the overlap of the respective categories. Note that despite the seeming gain in the number of identified tRFs, there is an important penalty in the form of a sharp increase in the number of molecules whose tRNA origin cannot be established unequivocally: indeed, the number of ambiguous tRFs more than triples. Recall here that by 'ambiguous' we mean that an identical copy of the sequence at hand can be found elsewhere on the genome (i.e. outside of tRNA space). In this case, 'ambiguous'-sequenced reads that would map *with a mismatch* on tRNA space would be also found *without a mismatch* in non-tRNA locations of the human genome. (D) An example of average His(-1U) abundance (normalized, in RPM) in two different cancer types. Points represent mean and vertical bars the standard deviation. Asterisks indicate statistical significance (Mann-Whitney U-test; P-value<0.01) between the two cancer types as examined for the tRFs ending at positions 18-23. Recall that even though the absolute abundance of these tRFs differs between cancer types, their ratios is conserved. (E-F) Box-plot of the abundance of the nuclear (E) and mitochondrial (F) tRNA<sup>HisGTG</sup> genes. The colored lines connecting the medians are the ones represented on Fig. 1C. Note that there are statistically-significant abundance differences among cancer types (see also Fig. 1D). (G) Length distributions of the three structural fragment categories (5'-, 3'- and i-tRFs) for 32 cancer types. Data are shown as the mean expression of all respective tRFs across all samples of each cancer type. Hierarchical clustering (metric: Kendall's tau distance) first separates mitochondrial (MT) and nuclear (N) tRFs and then tRFs by length.

**A****ACC**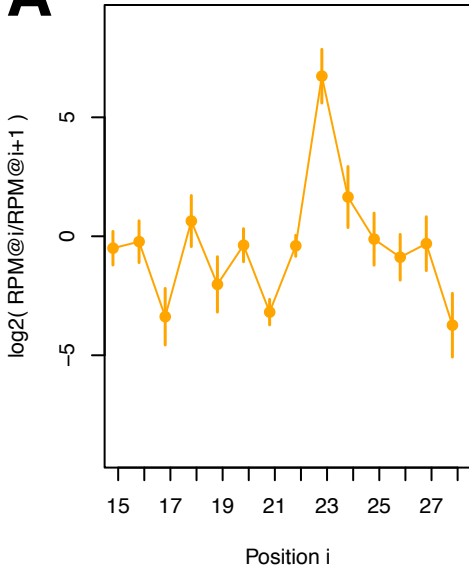**BLCA**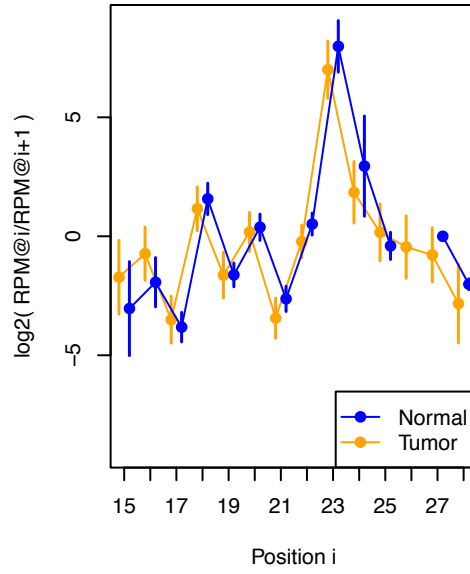**BRCA**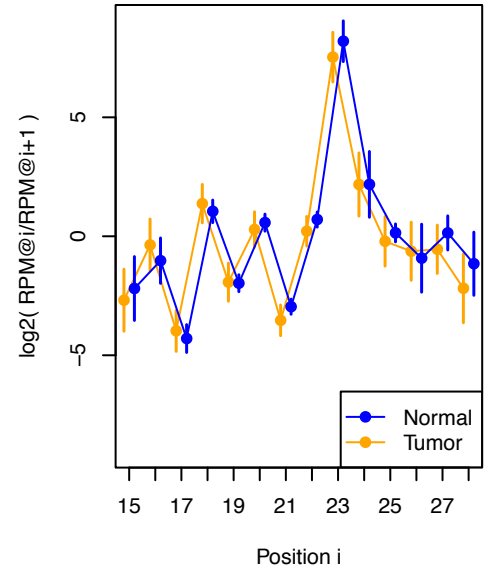**CESC**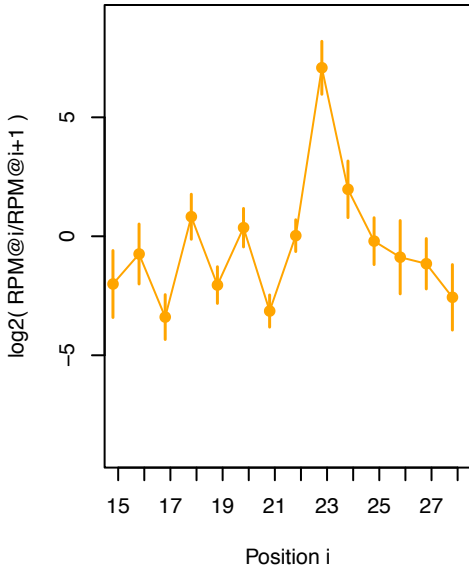**CHOL**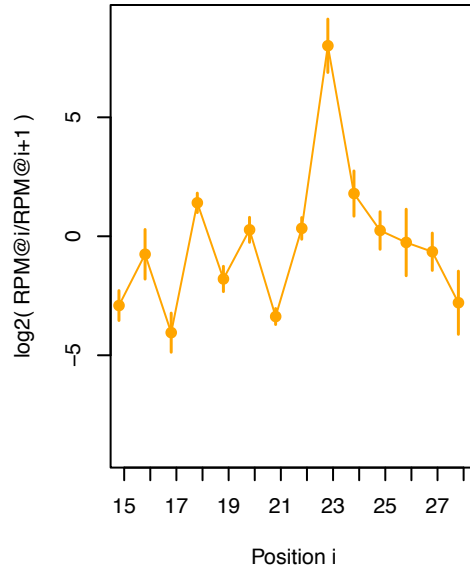**COAD**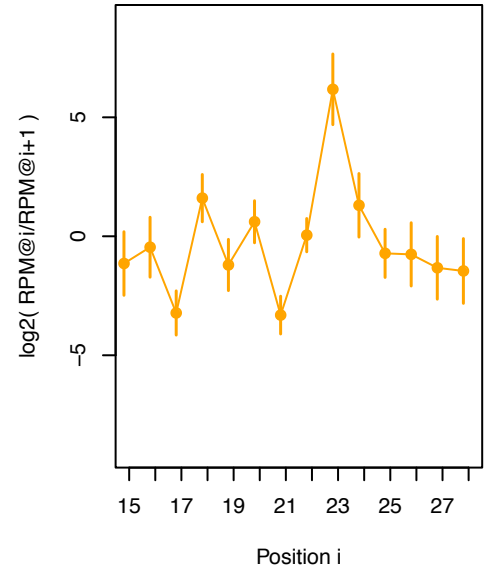**DLBC**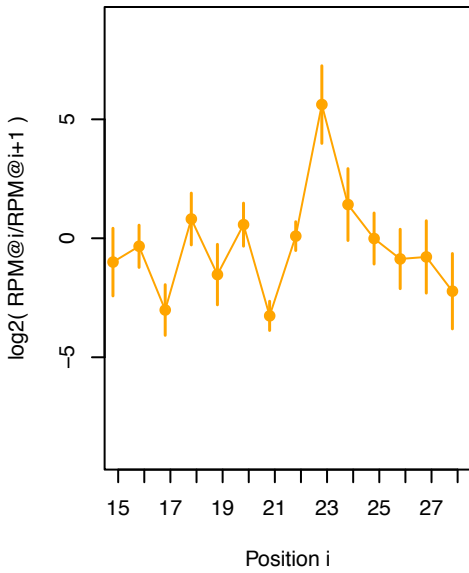**ESCA**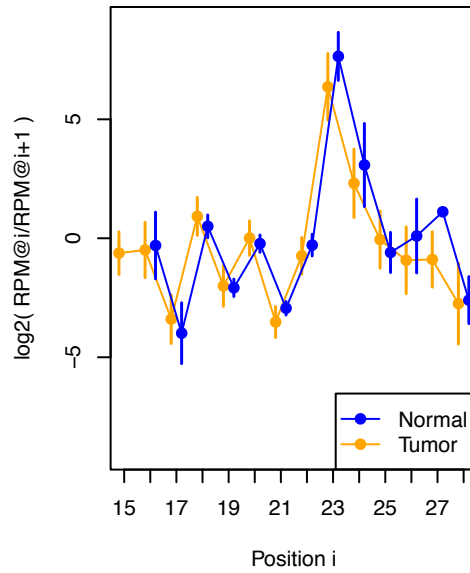**HNSC**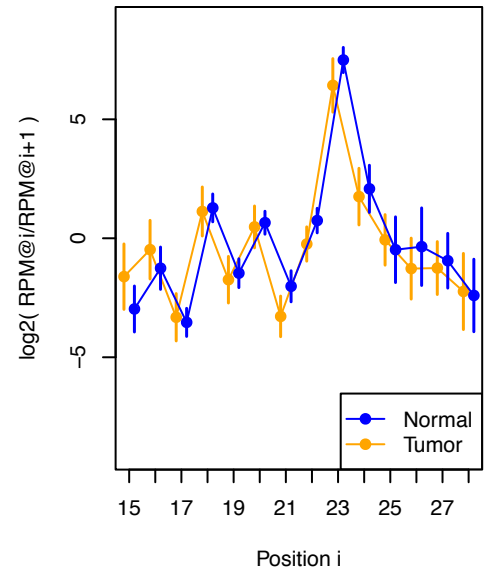

**KICH**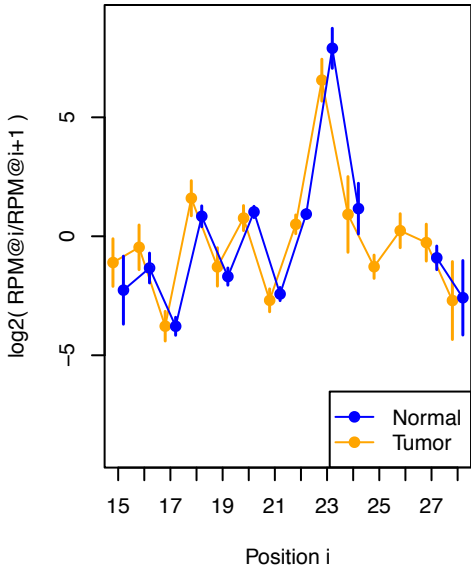**KIRC**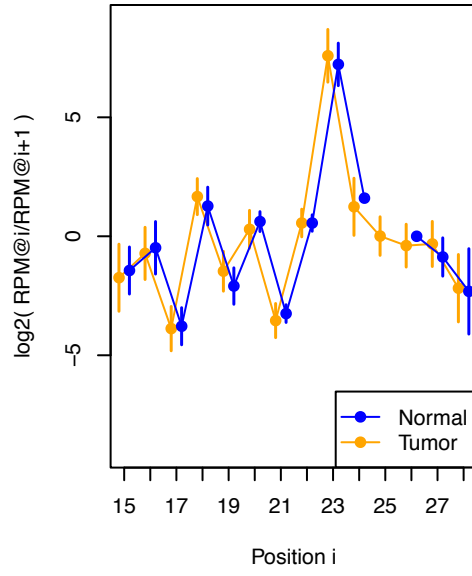**KIRP**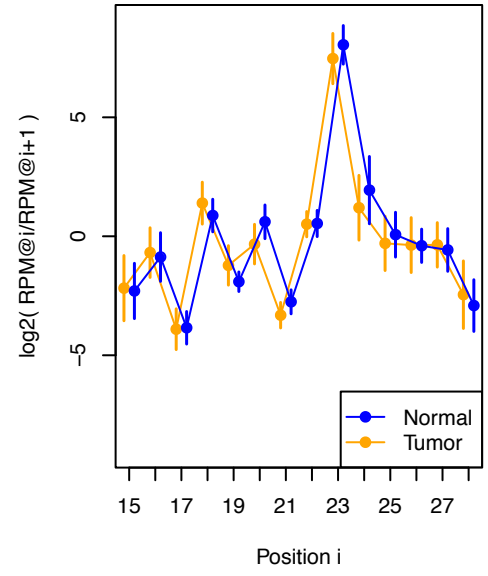**LAML**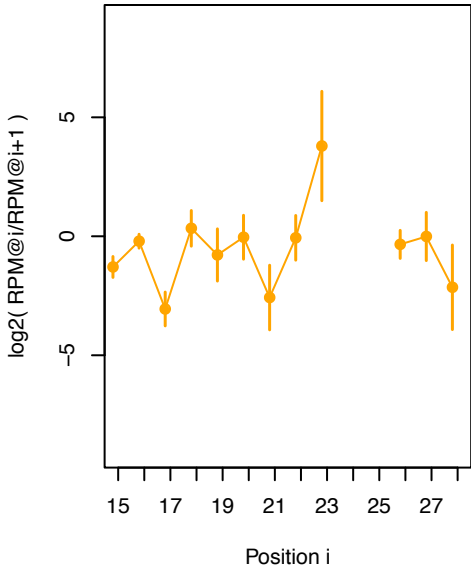**LGG**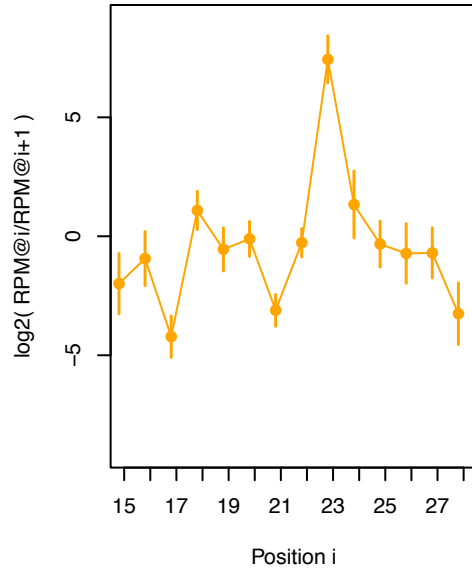**LIHC**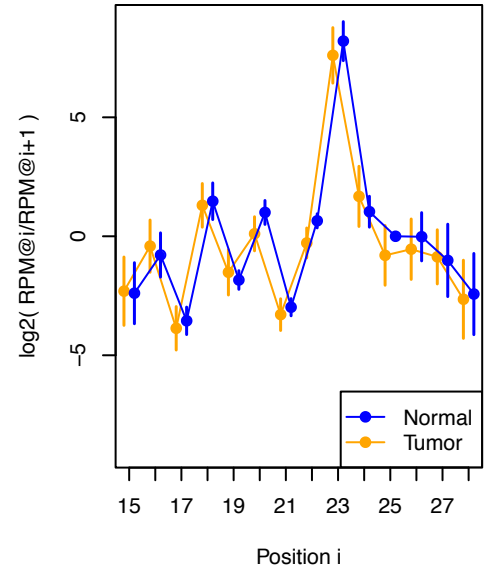**LUAD**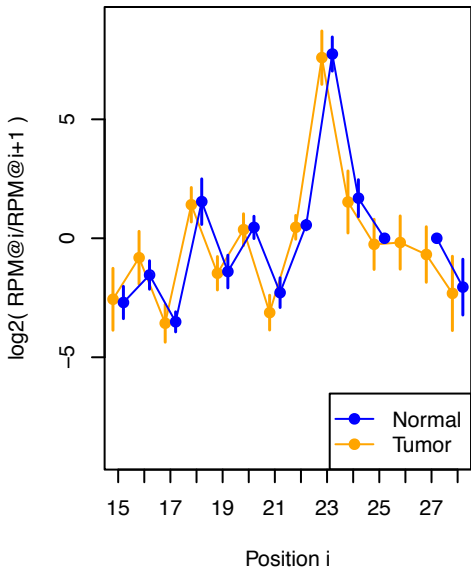**LUSC**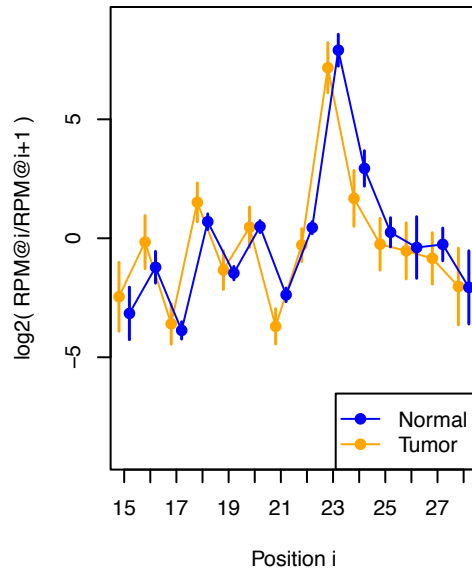**MESO**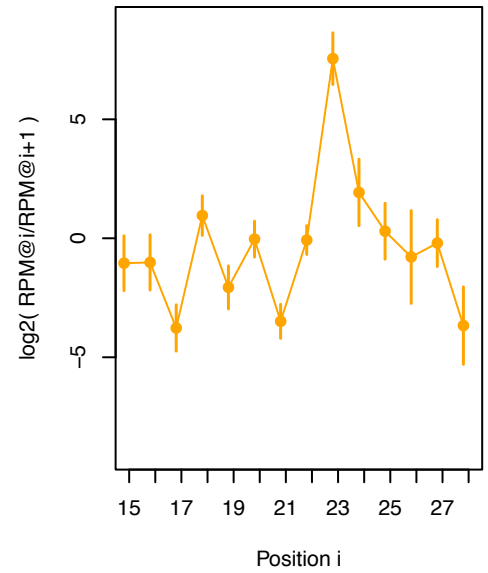

**OV**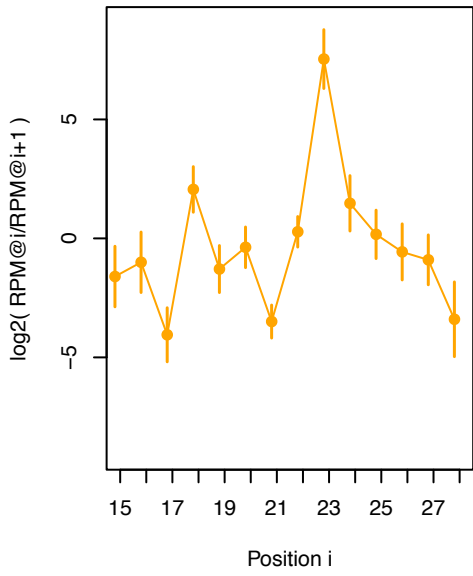**PAAD**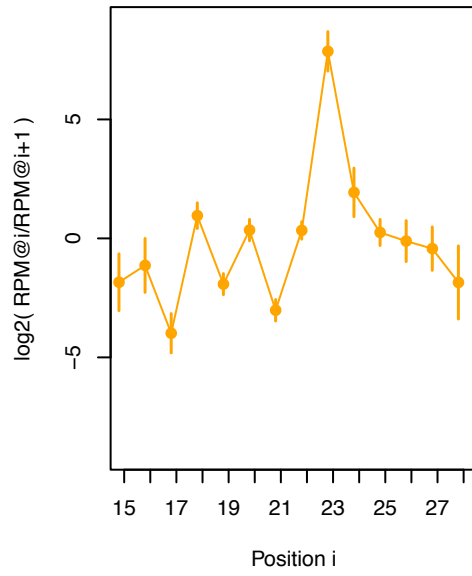**PCPG**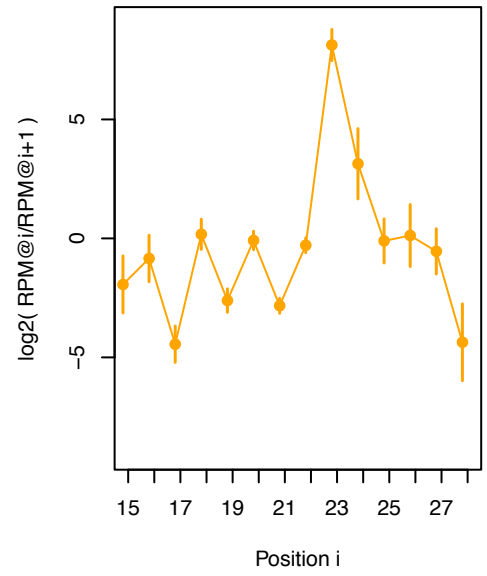**PRAD**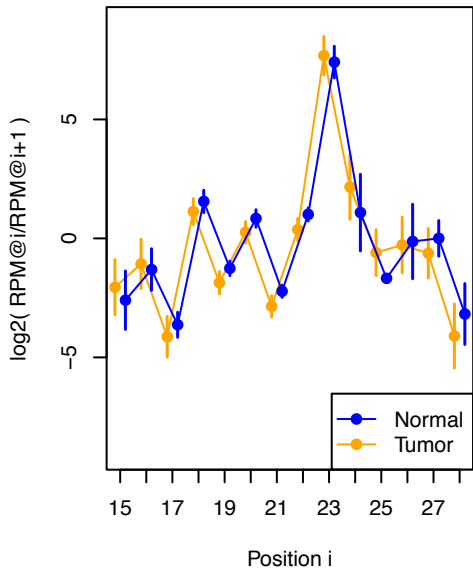**READ**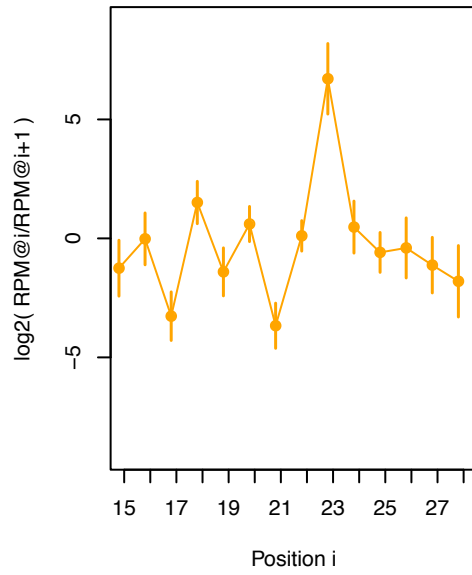**SARC**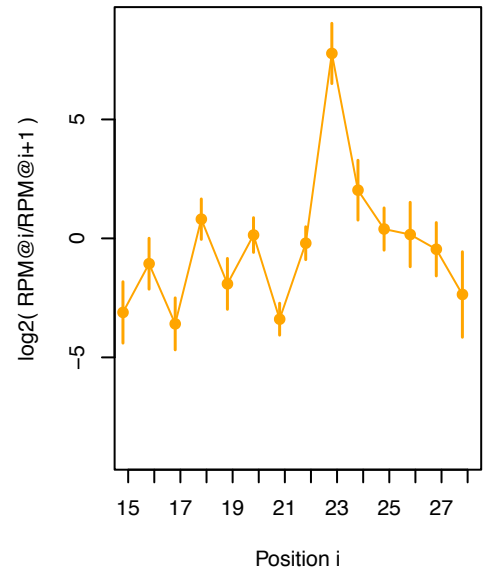**SKCM**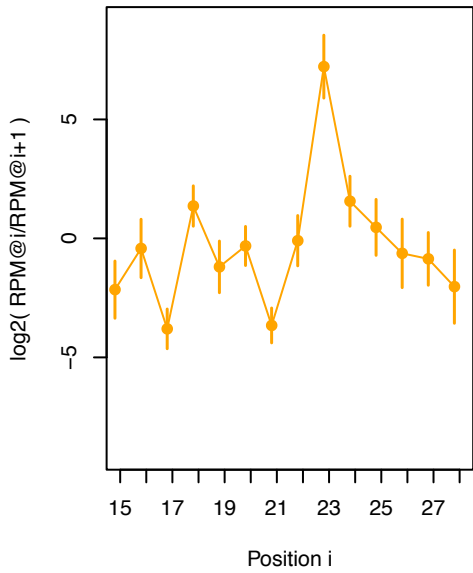**STAD**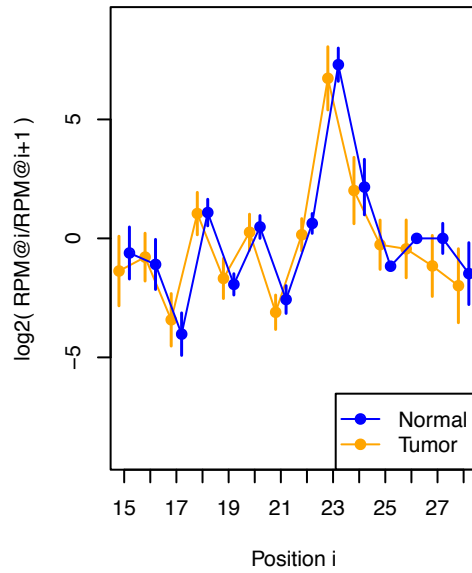**TGCT**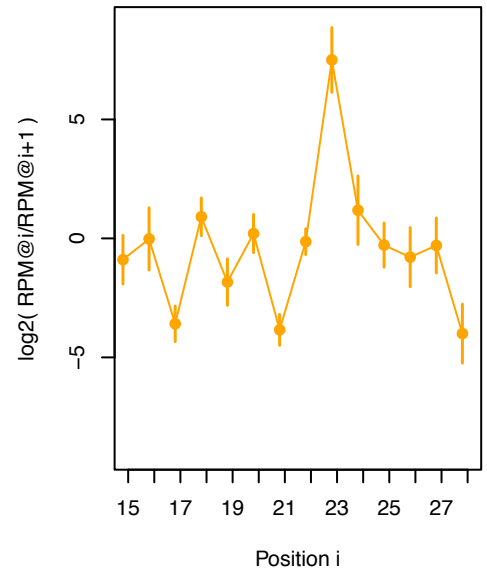

**THCA**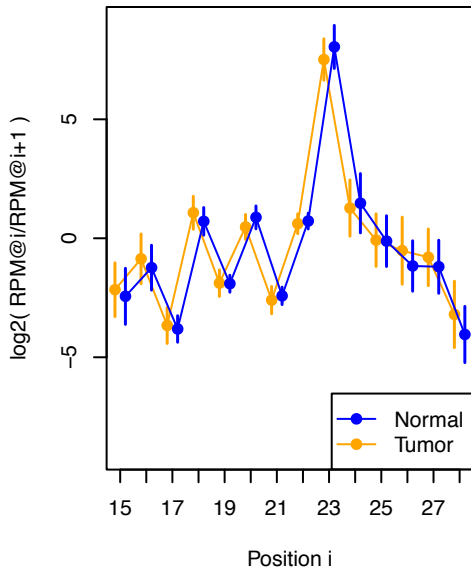**THYM**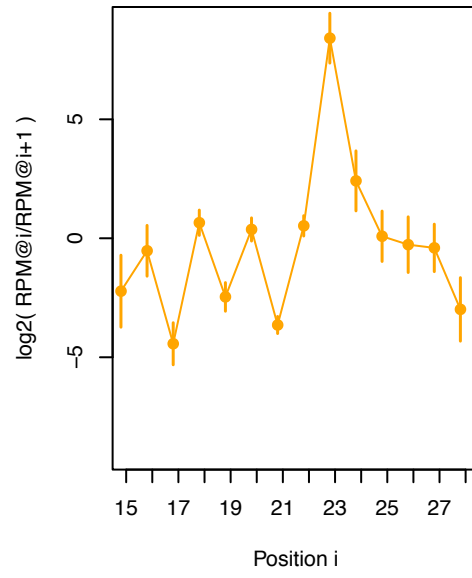**UCEC**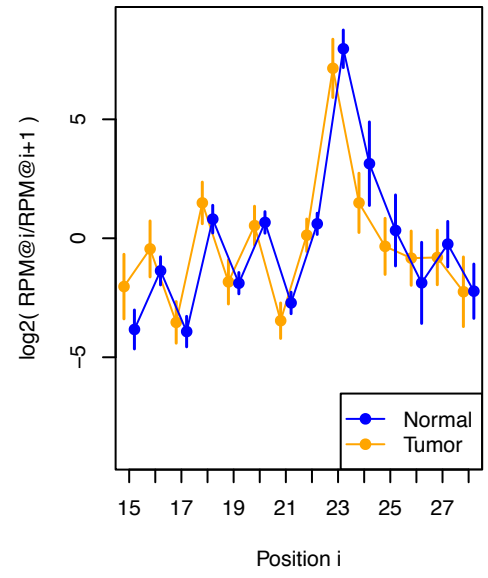**UCS**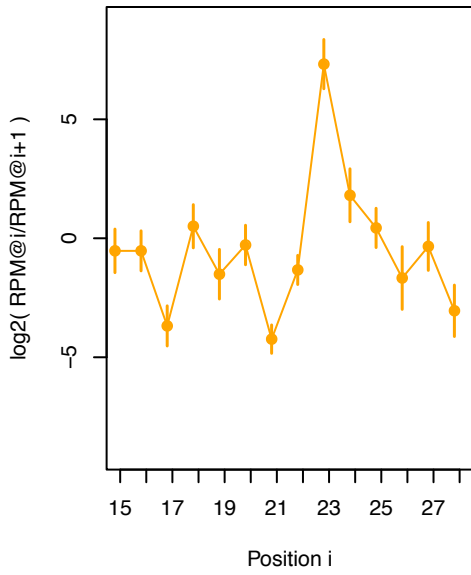**UVM**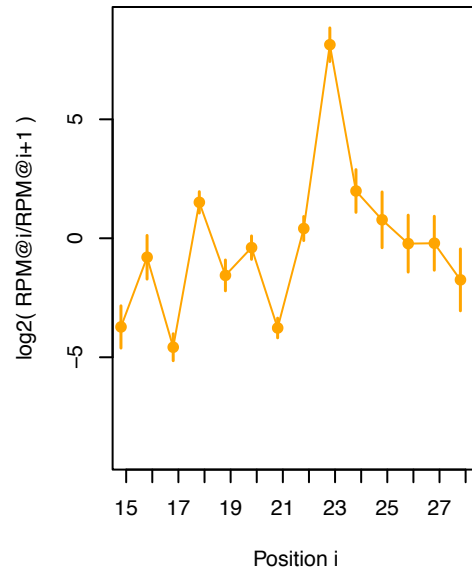

# B 5'-tRFs starting at position +1

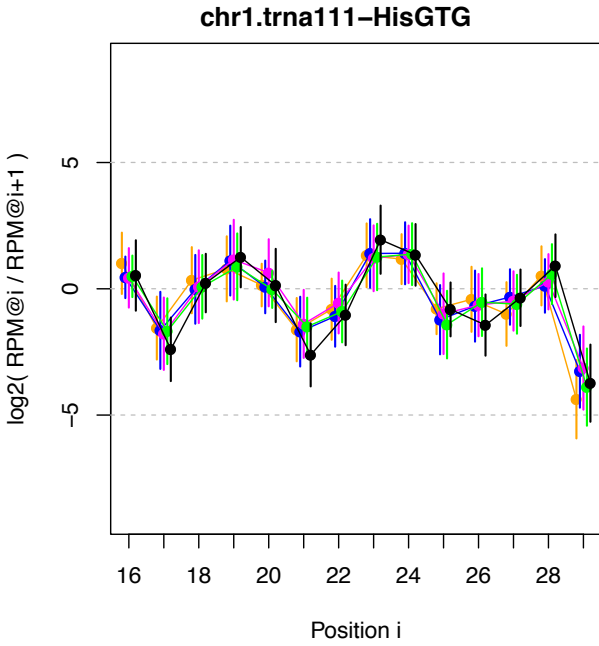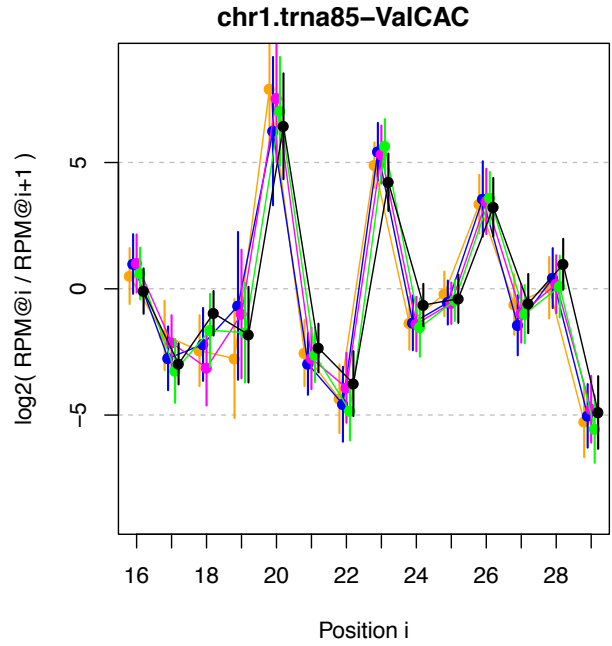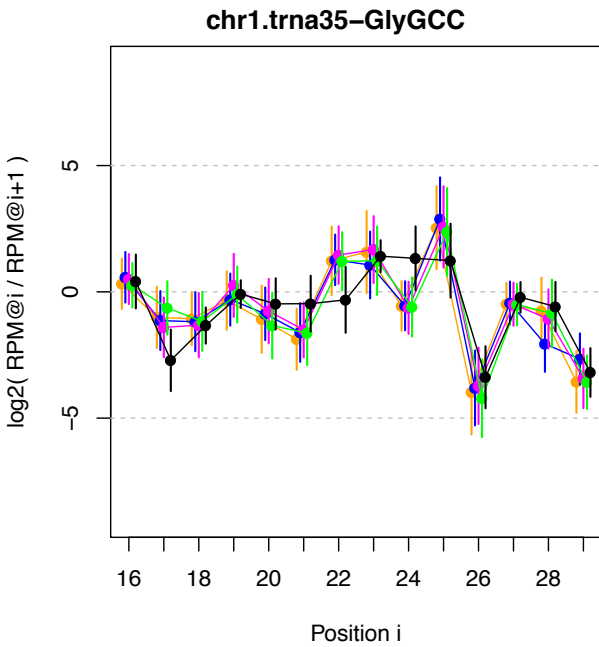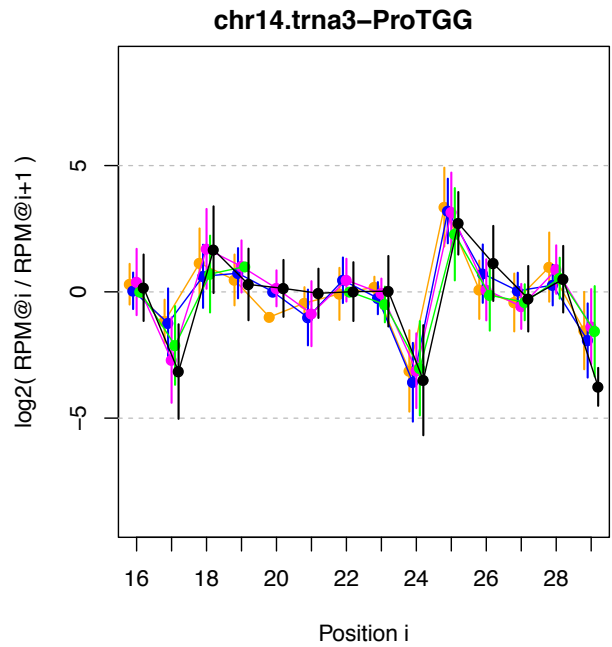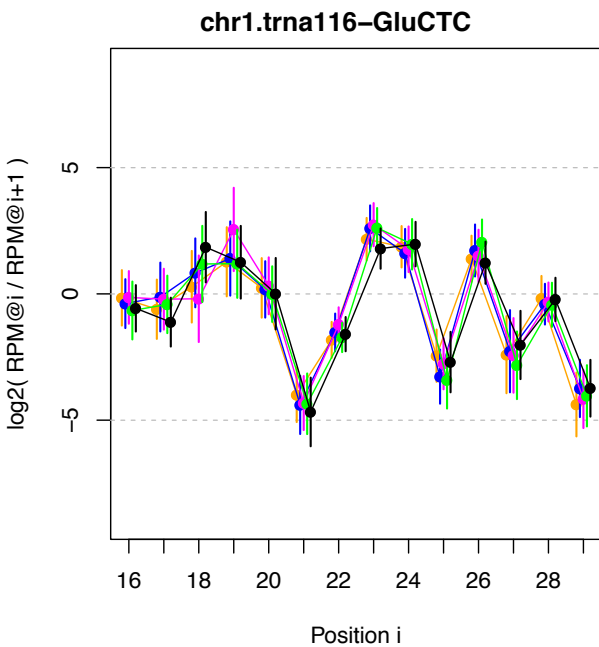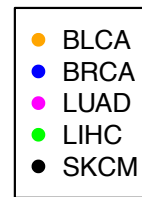

**Supplemental Fig. S2.** (A) Ratio of His(-1U) 5'-tRFs across all 32 cancer types as well as in normal samples, where available. Axes and values are the same as Fig. 1B. (B) Ratios of 5'-tRFs from additional isoacceptors. Note that the see-saw pattern is not found in these examples.



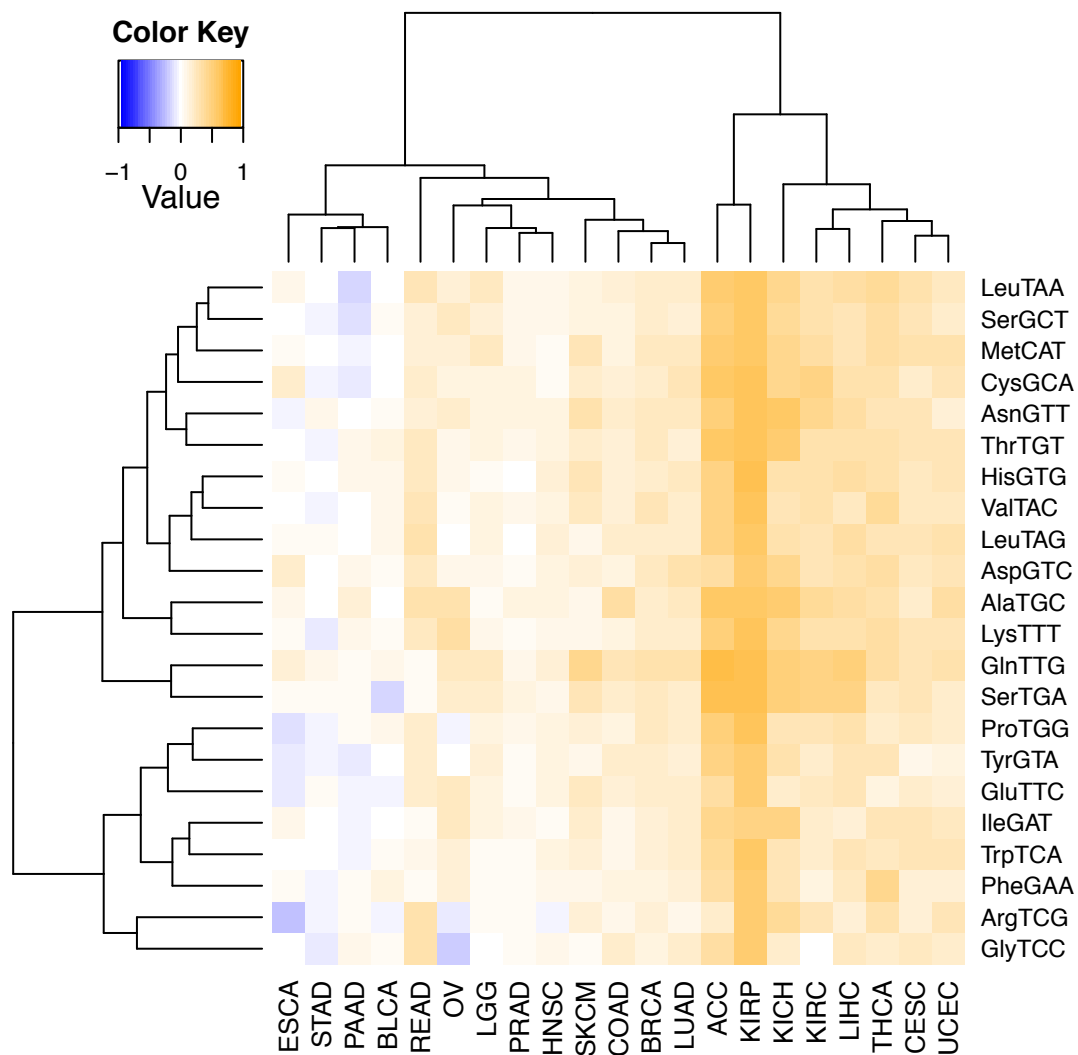

**Supplemental Fig. S3.** Heatmap and Hierarchical Clustering (metric: Euclidean distance) of the Spearman's rho correlation coefficients between mtDNA copy number and tRF abundance levels.

AllTCGAP projects (n=3136)  
5'-half & exclusive (n=5)  
5' terminus relative to 5' end of the tRNA (n=5)

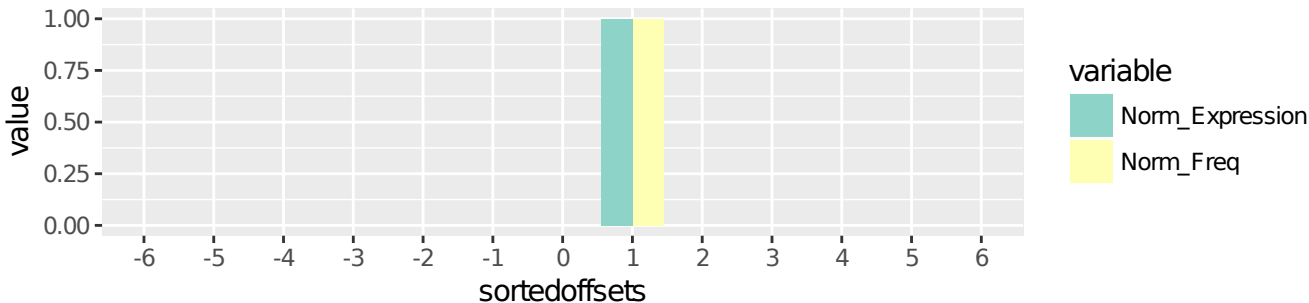

AllTCGAP projects (n=3136)  
5'-half & exclusive (n=5)  
5' terminus relative to 5' end of the tRNA (n=5)

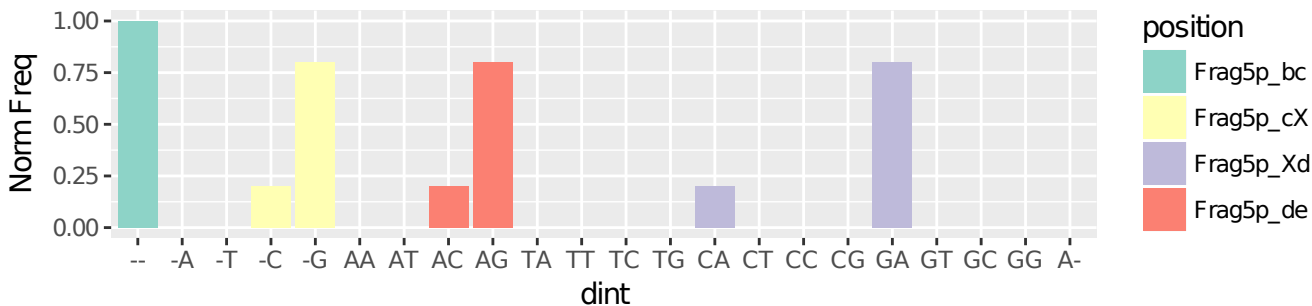

AllTCGAP projects (n=3136)  
5'-half & exclusive (n=5)  
5' terminus relative to 5' end of the tRNA (n=5)

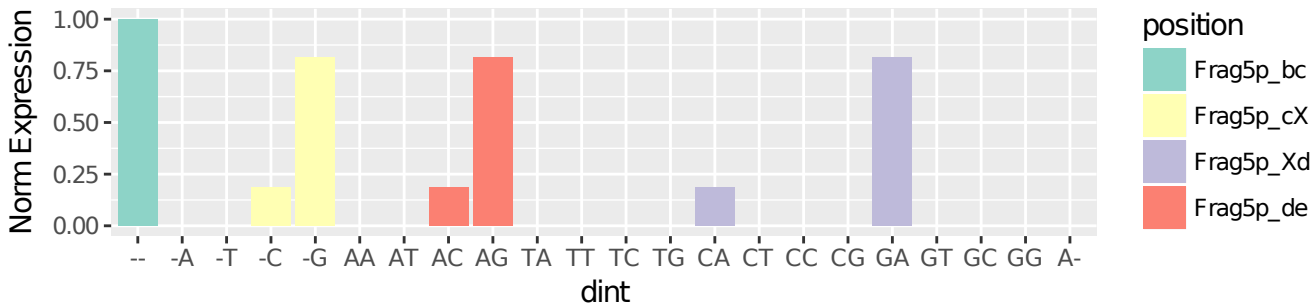

AllTCGAProjects (n=3136)

5'-half & exclusive (n=5)

3' terminus relative to 5' stem of A-loop (n=5)

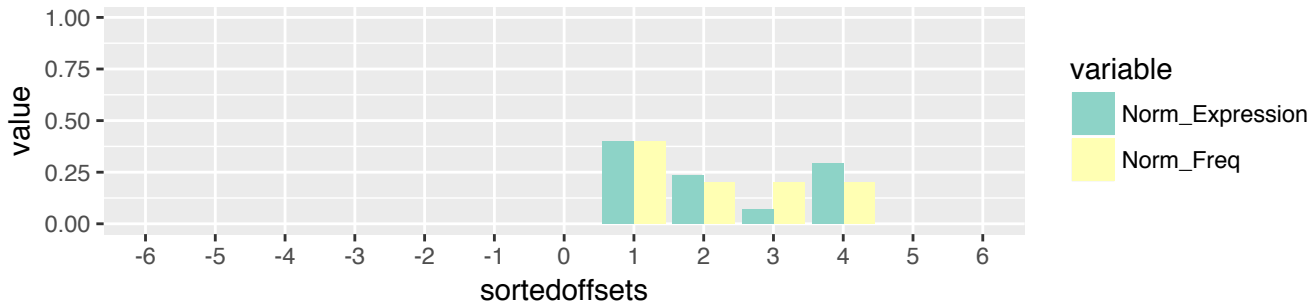

AllTCGAProjects (n=3136)

5'-half & exclusive (n=5)

3' terminus relative to 5' stem of A-loop (n=5)

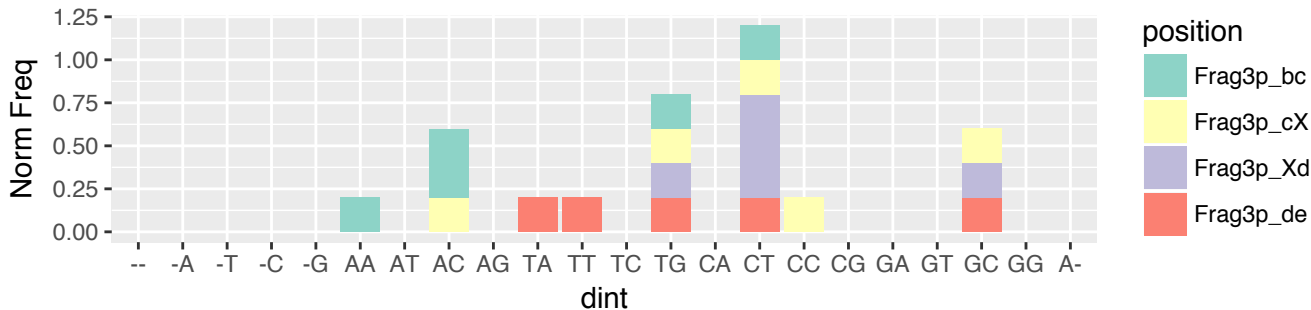

AllTCGAProjects (n=3136)

5'-half & exclusive (n=5)

3' terminus relative to 5' stem of A-loop (n=5)

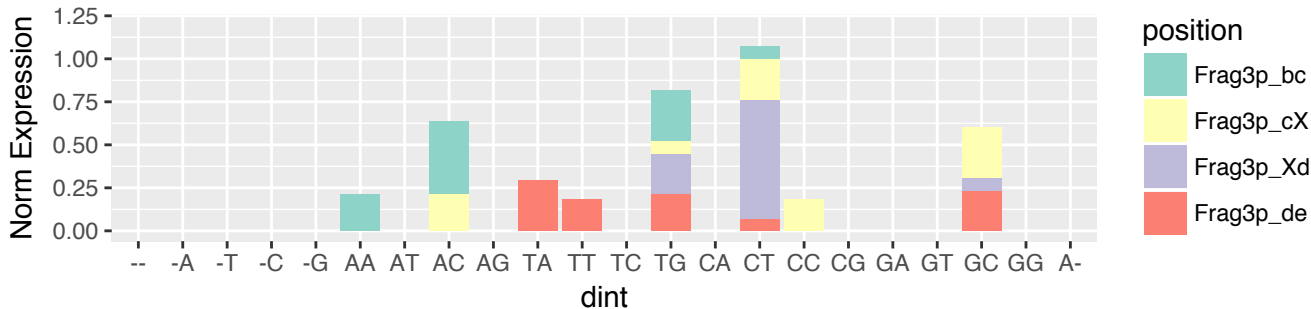

AllTCGAProjects (n=3136)  
 5'-tRF & exclusive (n=326)  
 5' terminus relative to 5' end of the tRNA (n=326)

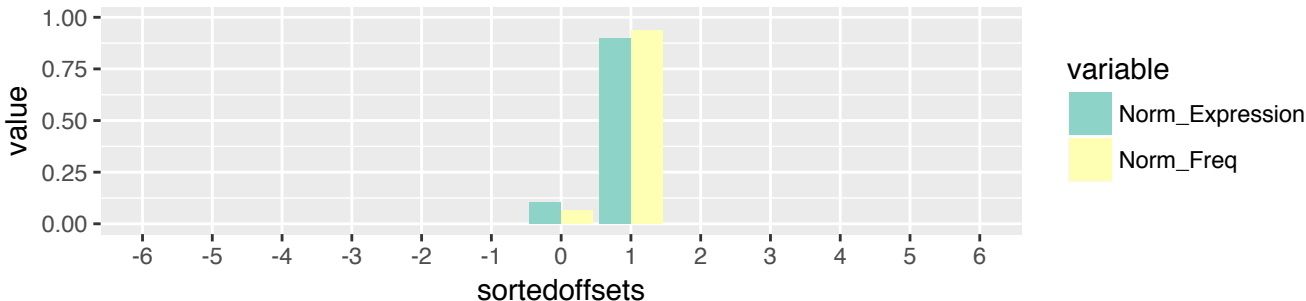

AllTCGAProjects (n=3136)  
 5'-tRF & exclusive (n=326)  
 5' terminus relative to 5' end of the tRNA (n=326)

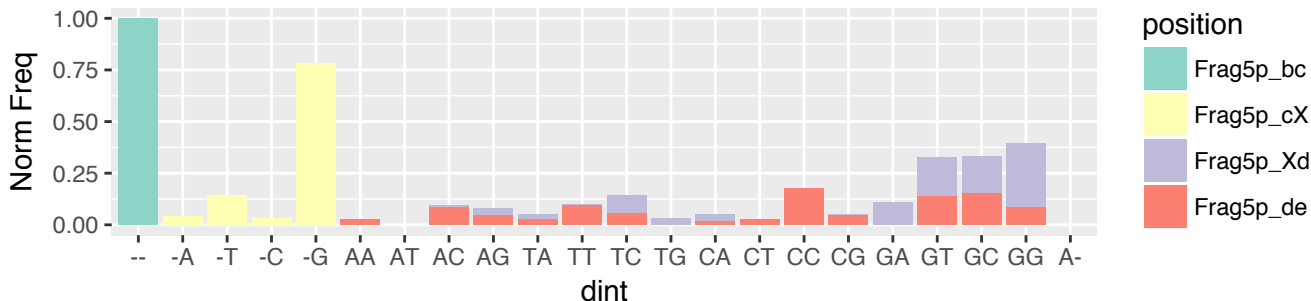

AllTCGAProjects (n=3136)  
 5'-tRF & exclusive (n=326)  
 5' terminus relative to 5' end of the tRNA (n=326)

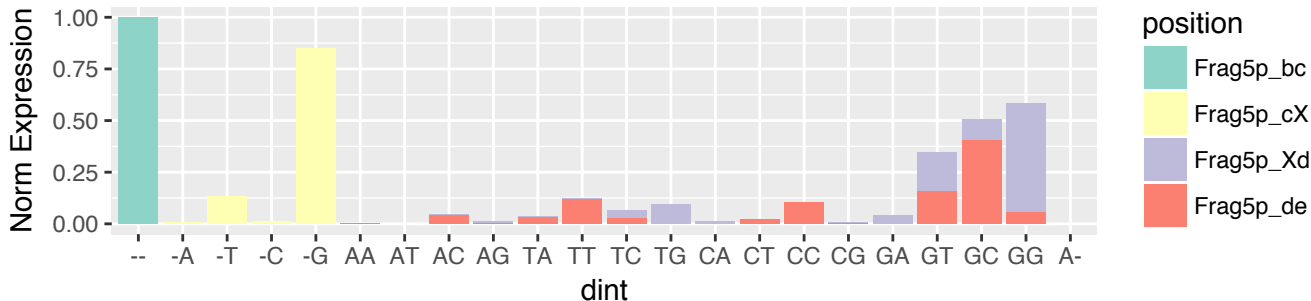

AllTCGAProjects (n=3136)  
 5'-tRF & exclusive (n=326)  
 3' terminus relative to 5' stem of D-loop (n=27)

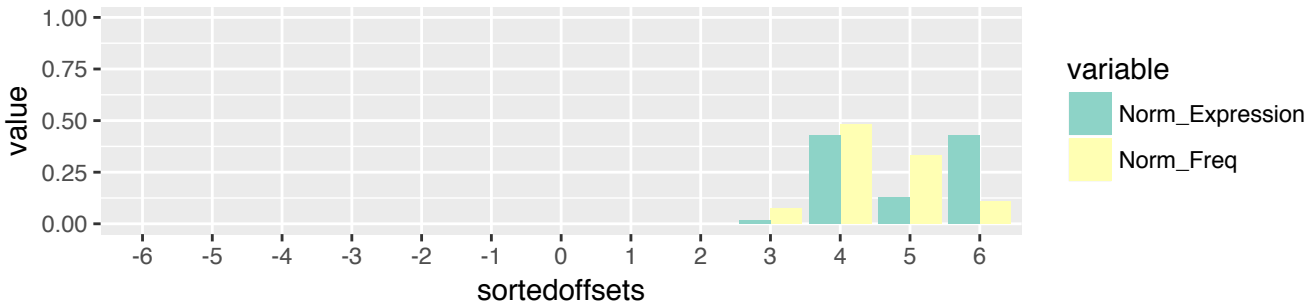

AllTCGAProjects (n=3136)  
 5'-tRF & exclusive (n=326)  
 3' terminus relative to 5' stem of D-loop (n=27)

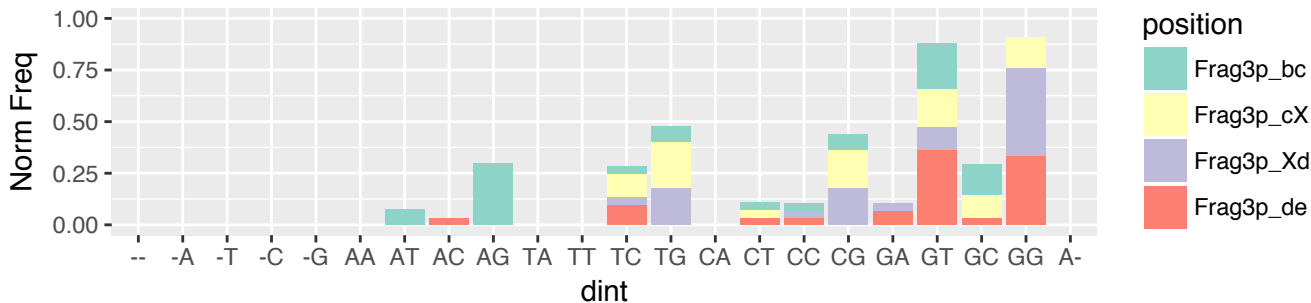

AllTCGAProjects (n=3136)  
 5'-tRF & exclusive (n=326)  
 3' terminus relative to 5' stem of D-loop (n=27)

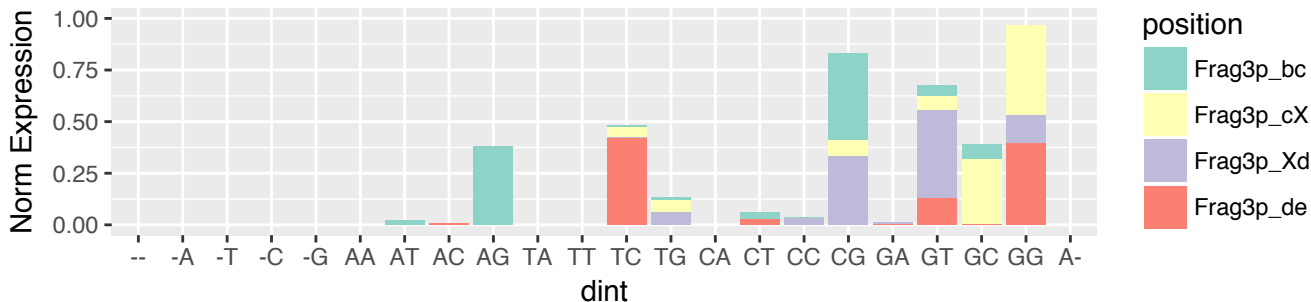

AllTCGAProjects (n=3136)  
 5'-tRF & exclusive (n=326)  
 3' terminus relative to 3' stem of D-loop (n=269)

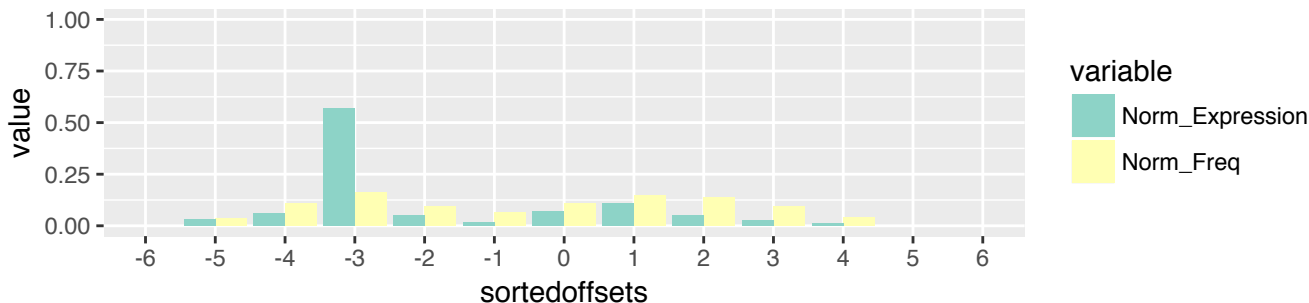

AllTCGAProjects (n=3136)  
 5'-tRF & exclusive (n=326)  
 3' terminus relative to 3' stem of D-loop (n=269)

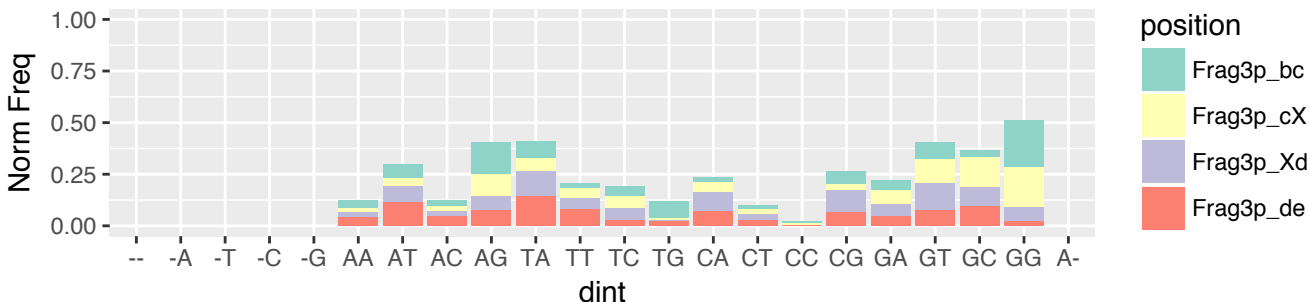

AllTCGAProjects (n=3136)  
 5'-tRF & exclusive (n=326)  
 3' terminus relative to 3' stem of D-loop (n=269)

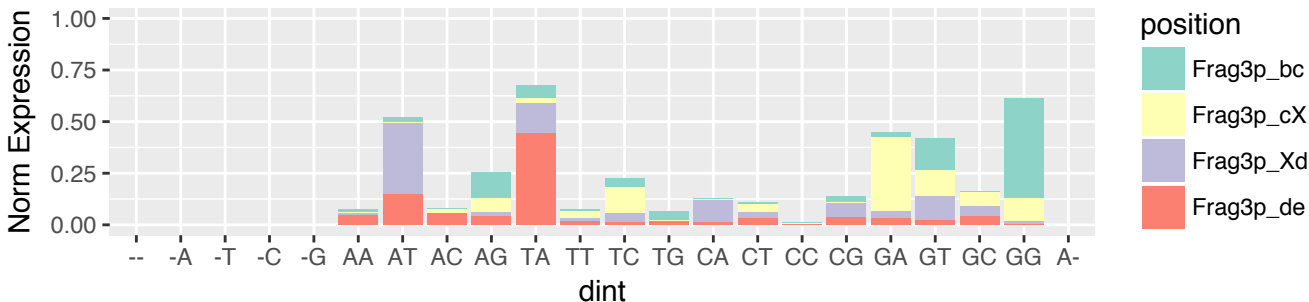

AllTCGAProjects (n=3136)  
 5'-tRF & exclusive (n=326)  
 3' terminus relative to 5' stem of A-loop (n=24)

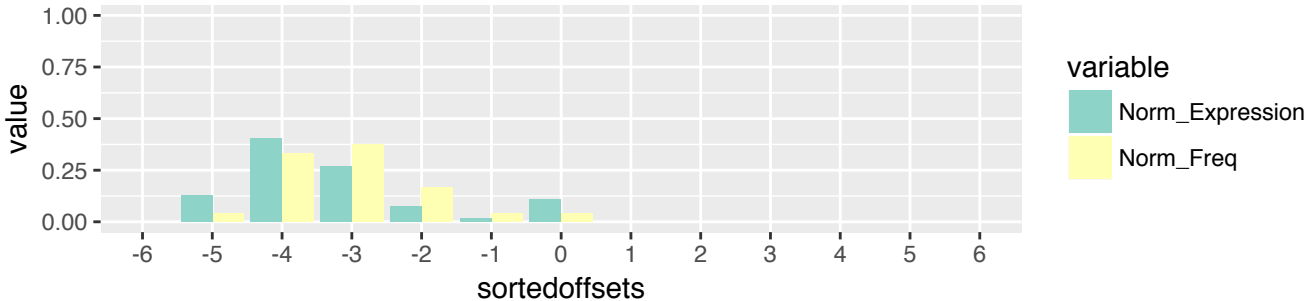

AllTCGAProjects (n=3136)  
 5'-tRF & exclusive (n=326)  
 3' terminus relative to 5' stem of A-loop (n=24)

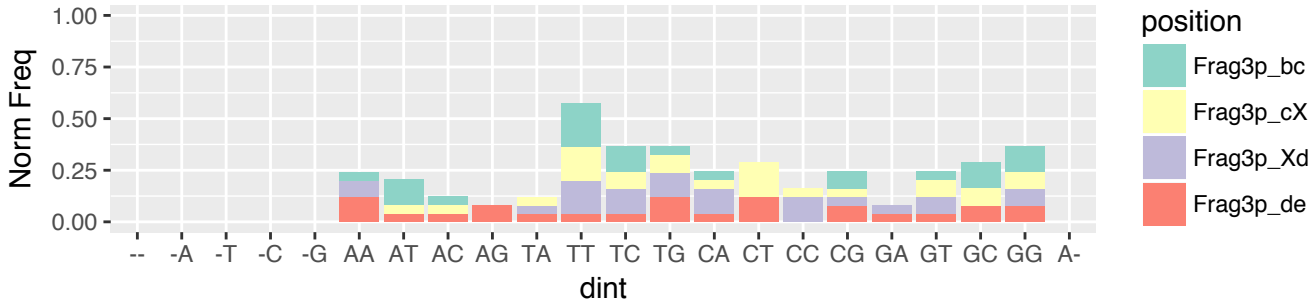

AllTCGAProjects (n=3136)  
 5'-tRF & exclusive (n=326)  
 3' terminus relative to 5' stem of A-loop (n=24)

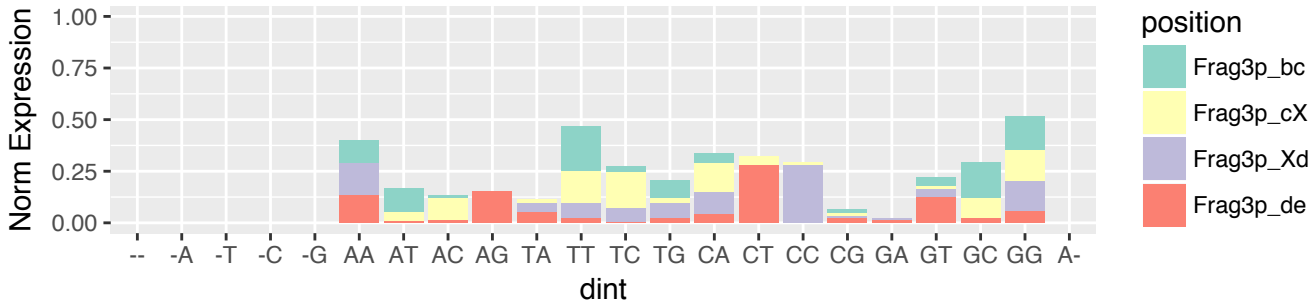

AllTCGAProjects (n=3136)  
 5'-tRF & exclusive (n=326)  
 3' terminus relative to 3' stem of A-loop (n=6)

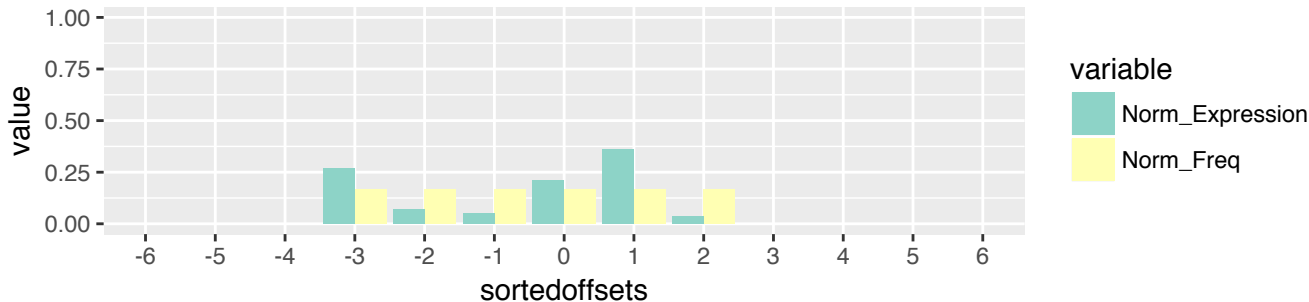

AllTCGAProjects (n=3136)  
 5'-tRF & exclusive (n=326)  
 3' terminus relative to 3' stem of A-loop (n=6)

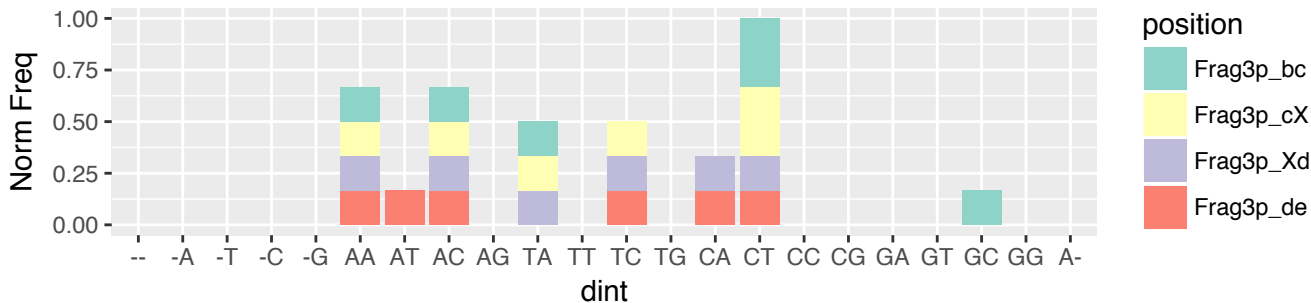

AllTCGAProjects (n=3136)  
 5'-tRF & exclusive (n=326)  
 3' terminus relative to 3' stem of A-loop (n=6)

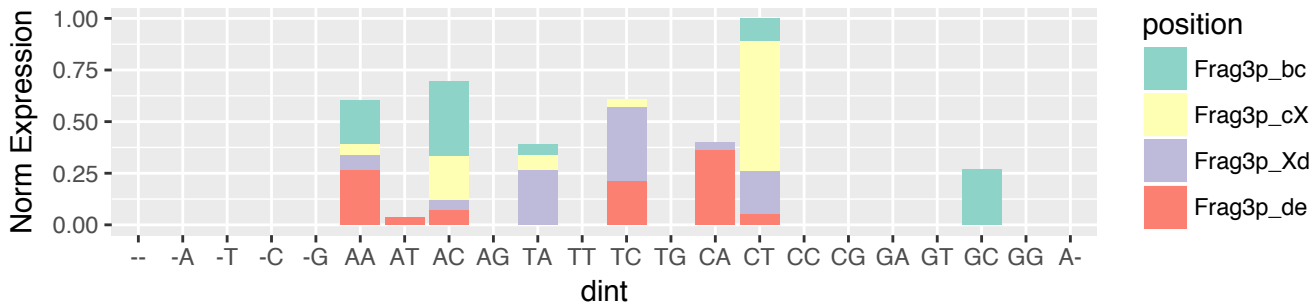



AllTCGAProjects (n=3136)  
 i-tRF & exclusive (n=965)  
 5' terminus relative to 5' end of the tRNA (n=65)

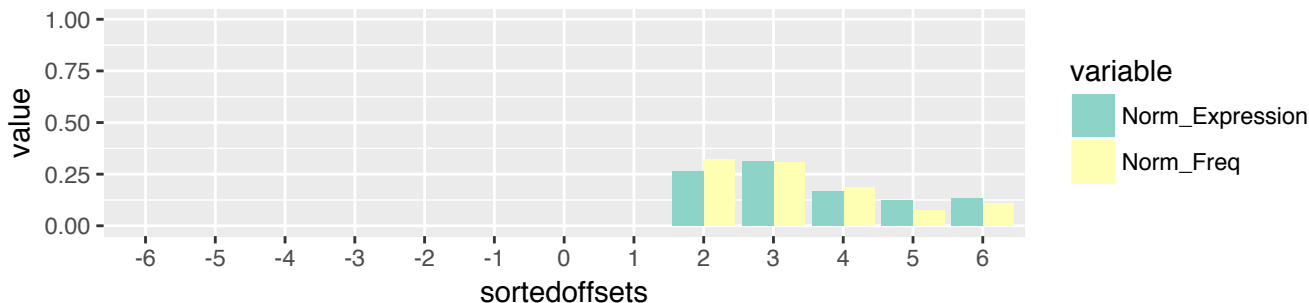

AllTCGAProjects (n=3136)  
 i-tRF & exclusive (n=965)  
 5' terminus relative to 5' end of the tRNA (n=65)

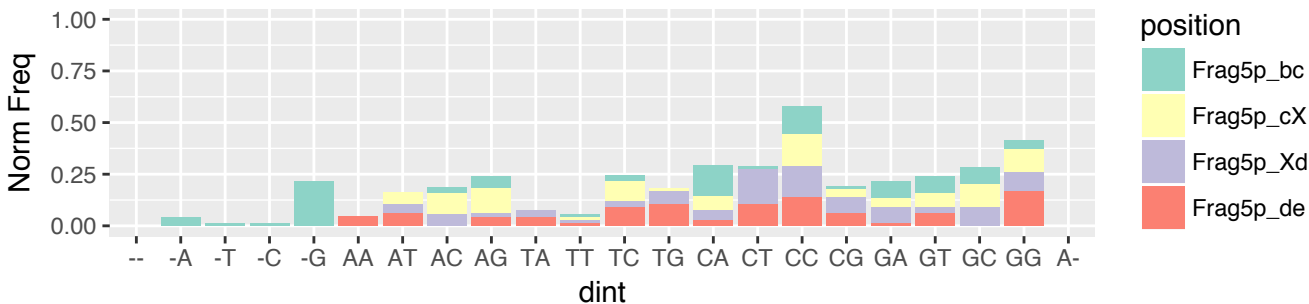

AllTCGAProjects (n=3136)  
 i-tRF & exclusive (n=965)  
 5' terminus relative to 5' end of the tRNA (n=65)

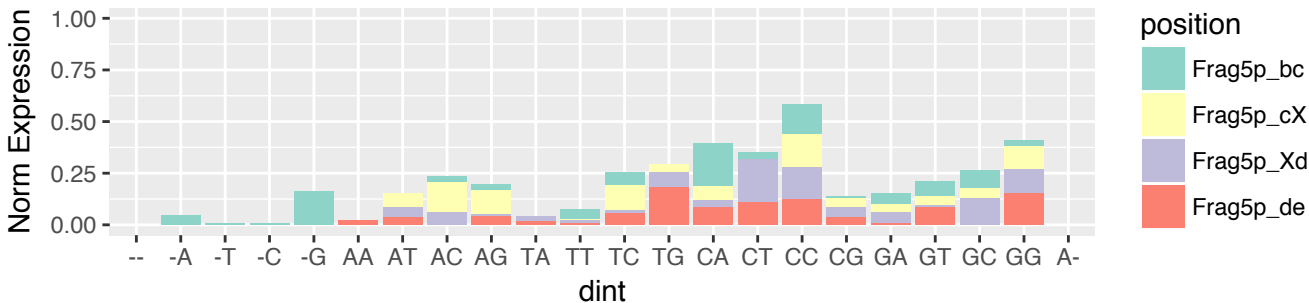

AllTCGAProjects (n=3136)  
 i-tRF & exclusive (n=965)  
 5' terminus relative to 5' stem of D-loop (n=292)

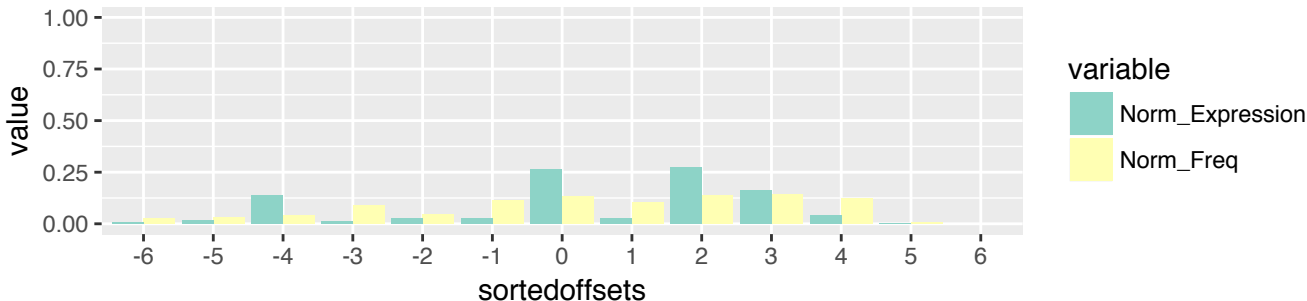

AllTCGAProjects (n=3136)  
 i-tRF & exclusive (n=965)  
 5' terminus relative to 5' stem of D-loop (n=292)

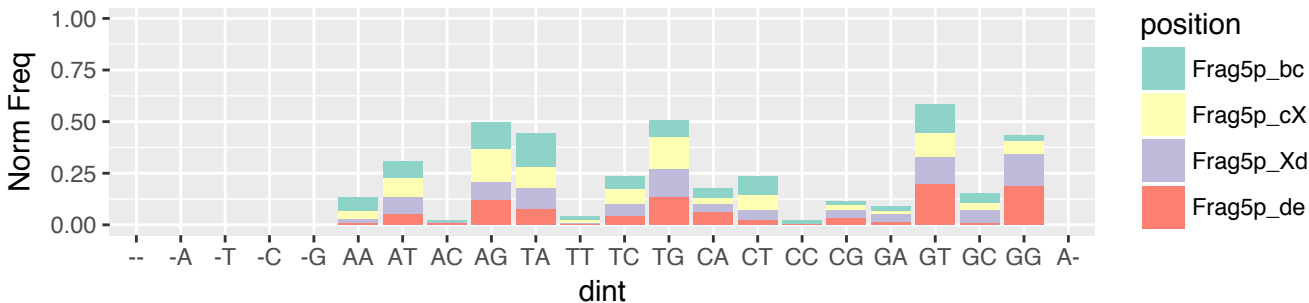

AllTCGAProjects (n=3136)  
 i-tRF & exclusive (n=965)  
 5' terminus relative to 5' stem of D-loop (n=292)

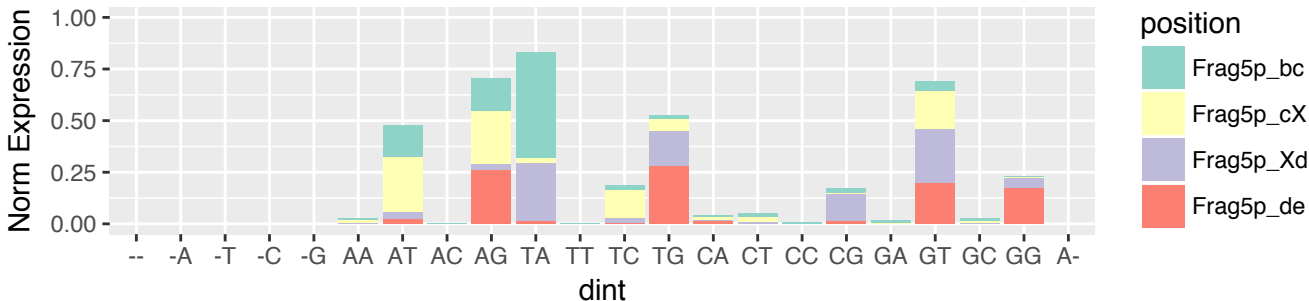

AllTCGAProjects (n=3136)  
 i-tRF & exclusive (n=965)  
 5' terminus relative to 3' stem of D-loop (n=85)

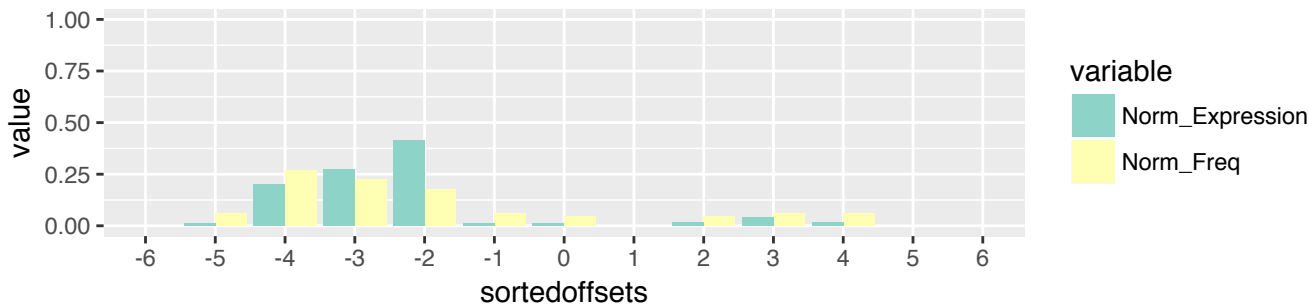

AllTCGAProjects (n=3136)  
 i-tRF & exclusive (n=965)  
 5' terminus relative to 3' stem of D-loop (n=85)

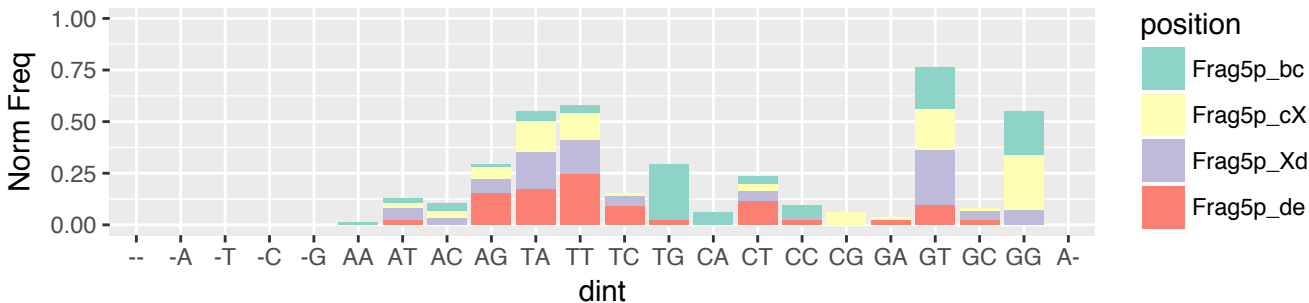

AllTCGAProjects (n=3136)  
 i-tRF & exclusive (n=965)  
 5' terminus relative to 3' stem of D-loop (n=85)

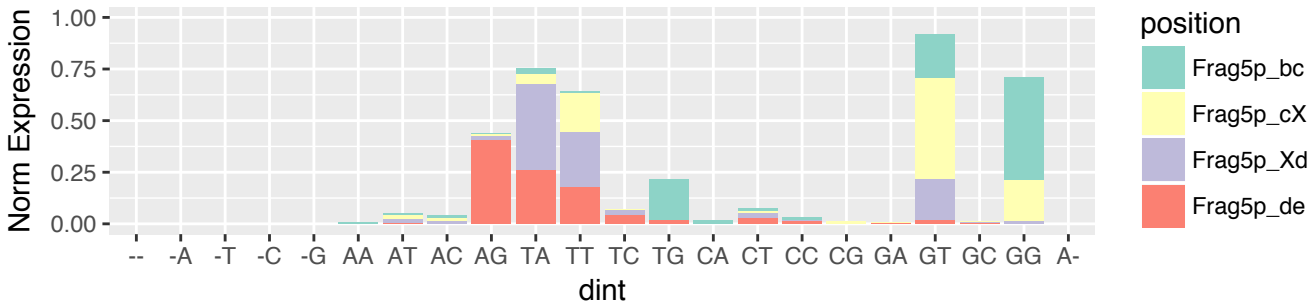

AllTCGAProjects (n=3136)  
 i-tRF & exclusive (n=965)  
 5' terminus relative to 5' stem of A-loop (n=261)

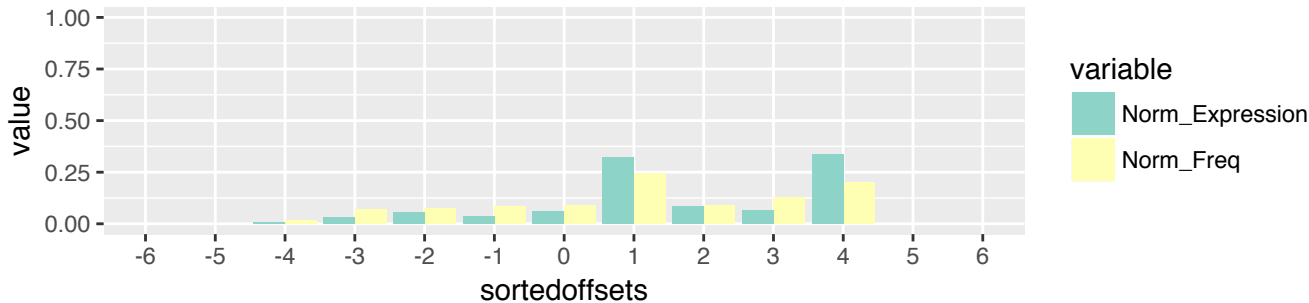

AllTCGAProjects (n=3136)  
 i-tRF & exclusive (n=965)  
 5' terminus relative to 5' stem of A-loop (n=261)

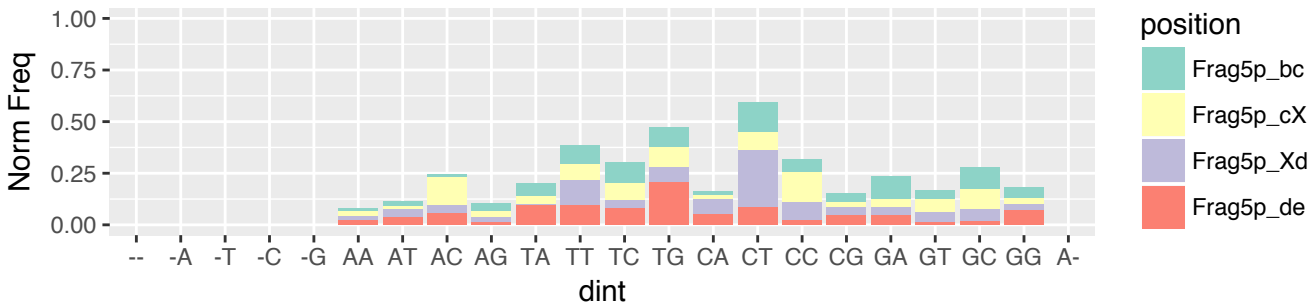

AllTCGAProjects (n=3136)  
 i-tRF & exclusive (n=965)  
 5' terminus relative to 5' stem of A-loop (n=261)

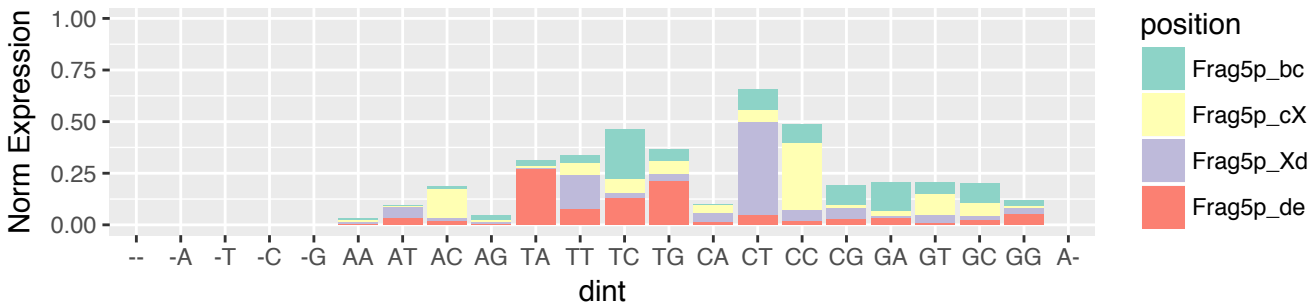

AllTCGAProjects (n=3136)  
 i-tRF & exclusive (n=965)  
 5' terminus relative to 3' stem of A-loop (n=157)

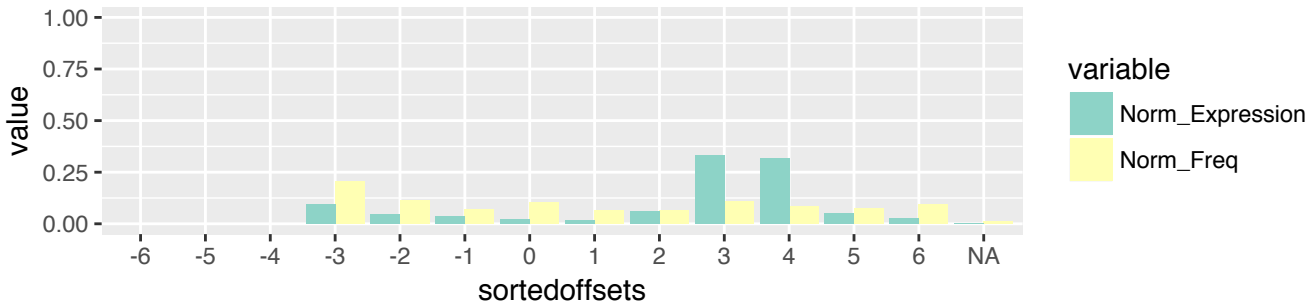

AllTCGAProjects (n=3136)  
 i-tRF & exclusive (n=965)  
 5' terminus relative to 3' stem of A-loop (n=157)

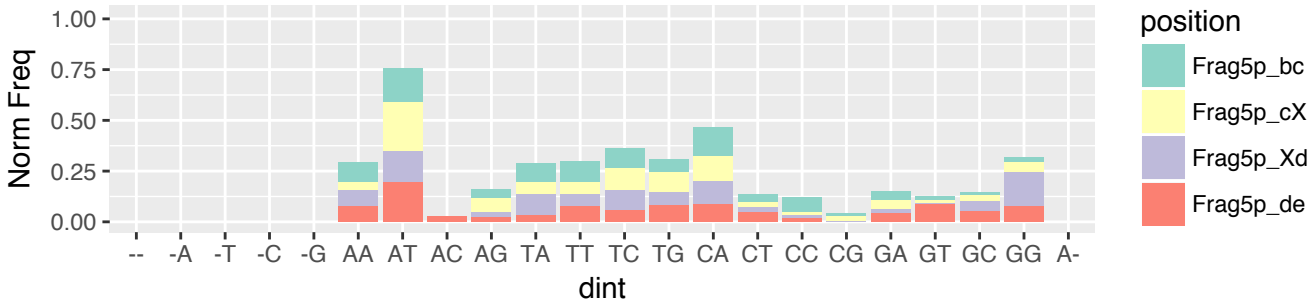

AllTCGAProjects (n=3136)  
 i-tRF & exclusive (n=965)  
 5' terminus relative to 3' stem of A-loop (n=157)

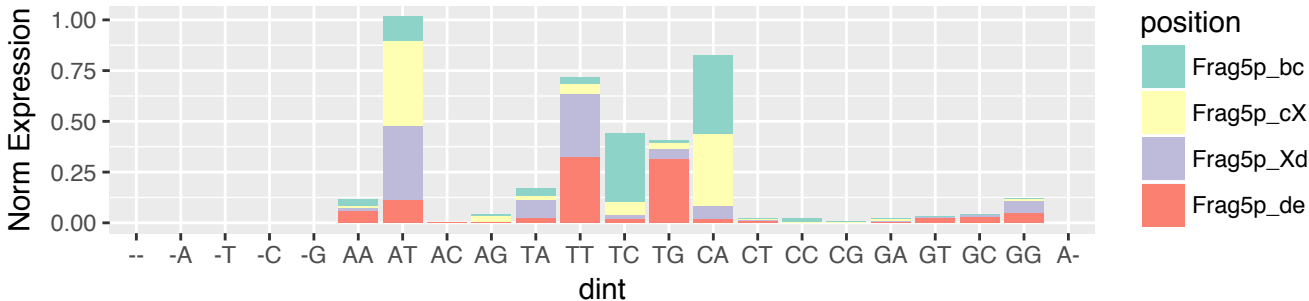

AITCGAProjects (n=3136)  
i-tRF & exclusive (n=965)  
5' terminus relative to 5' stem of T-loop (n=104)

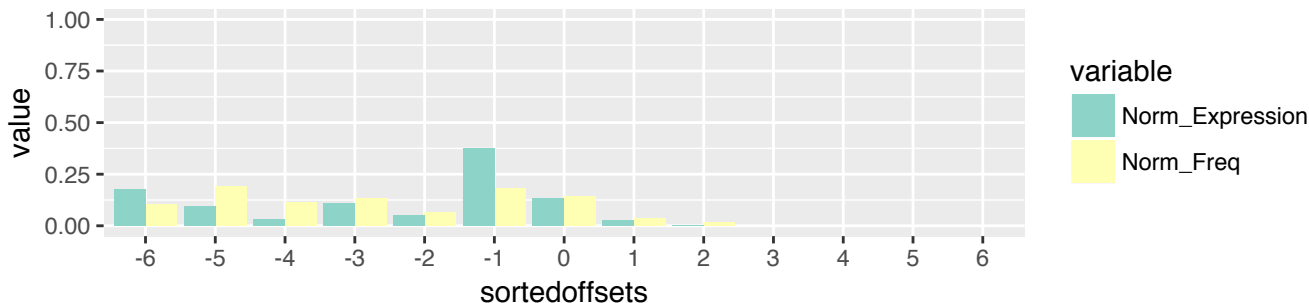

AITCGAProjects (n=3136)  
i-tRF & exclusive (n=965)  
5' terminus relative to 5' stem of T-loop (n=104)

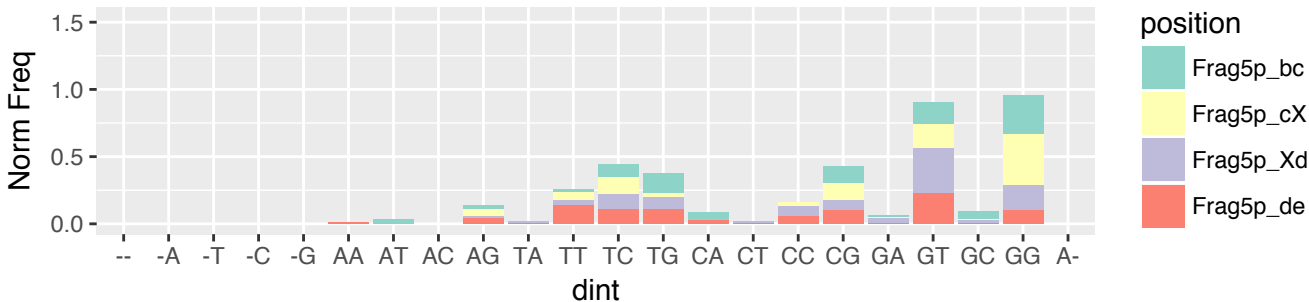

AITCGAProjects (n=3136)  
i-tRF & exclusive (n=965)  
5' terminus relative to 5' stem of T-loop (n=104)

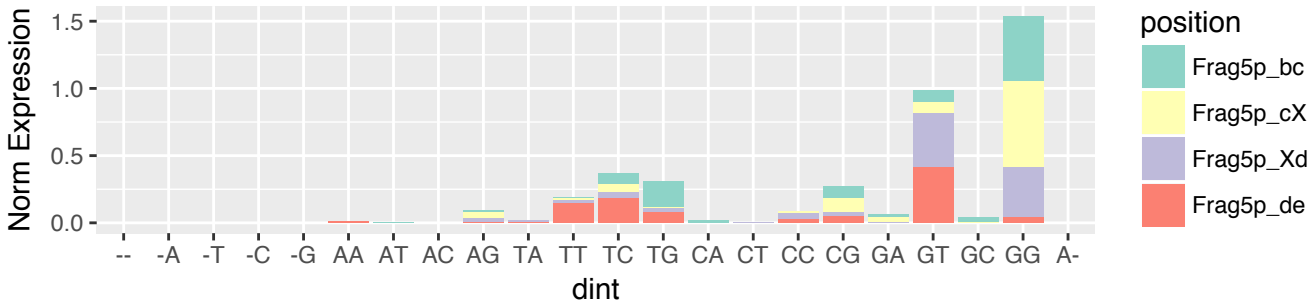

AllTCGAProjects (n=3136)  
 i-tRF & exclusive (n=965)  
 5' terminus relative to 3' stem of T-loop (n=1)

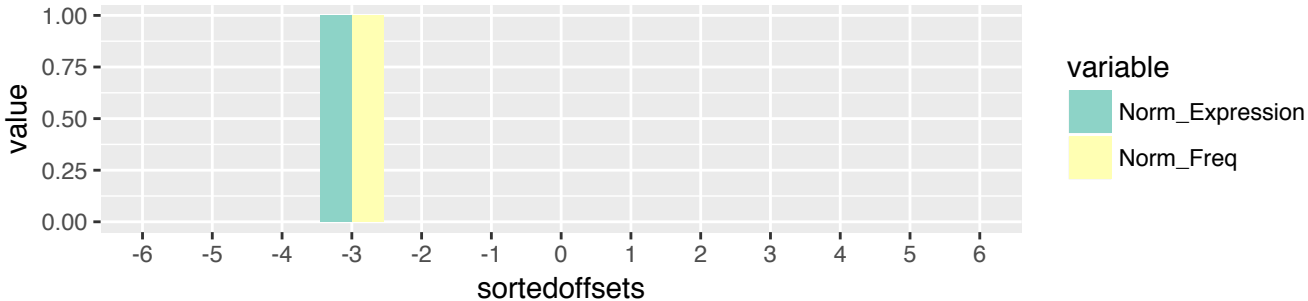

AllTCGAProjects (n=3136)  
 i-tRF & exclusive (n=965)  
 5' terminus relative to 3' stem of T-loop (n=1)

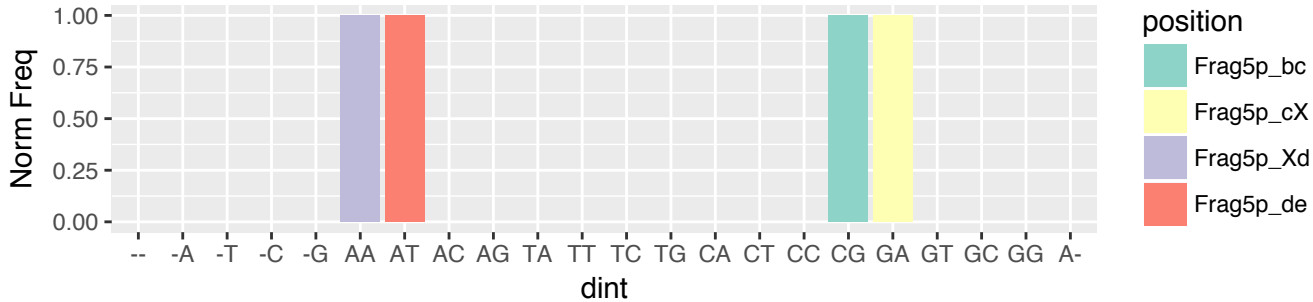

AllTCGAProjects (n=3136)  
 i-tRF & exclusive (n=965)  
 5' terminus relative to 3' stem of T-loop (n=1)

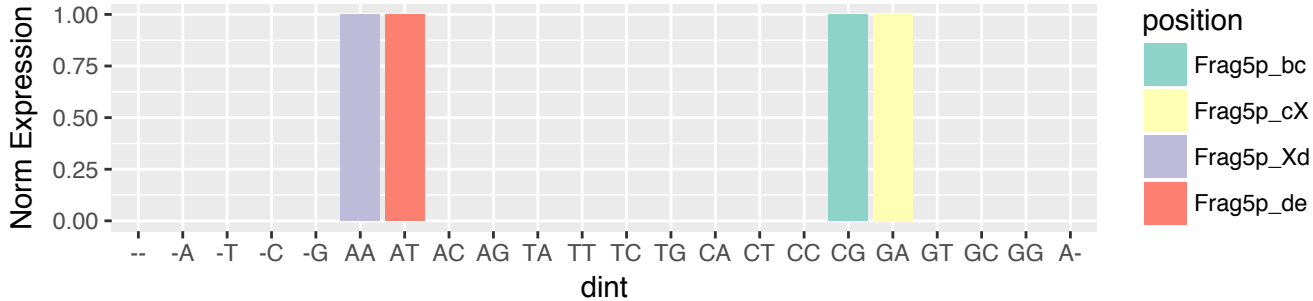

AllTCGAProjects (n=3136)  
 i-tRF & exclusive (n=965)  
 3' terminus relative to 3' stem of D-loop (n=39)

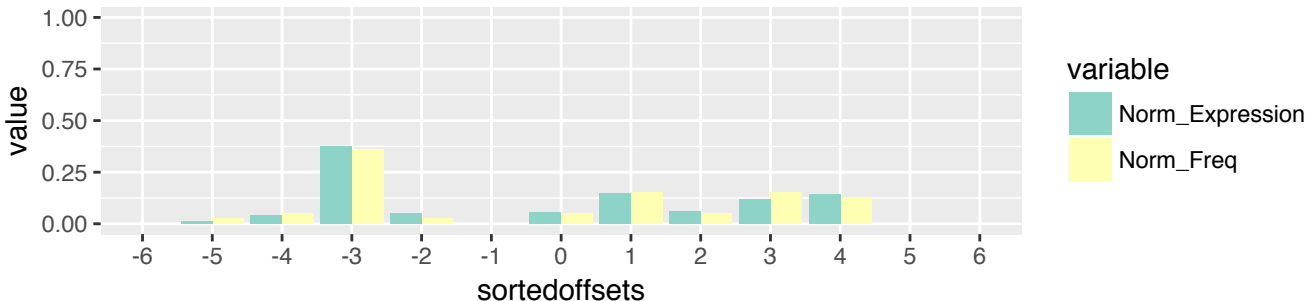

AllTCGAProjects (n=3136)  
 i-tRF & exclusive (n=965)  
 3' terminus relative to 3' stem of D-loop (n=39)

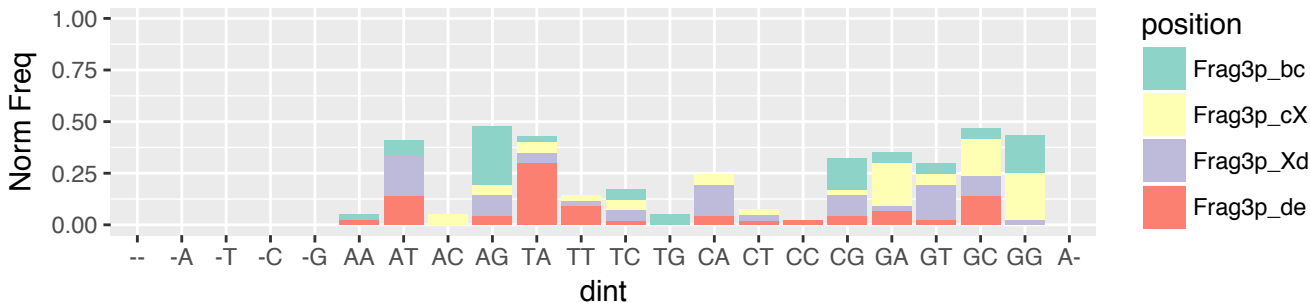

AllTCGAProjects (n=3136)  
 i-tRF & exclusive (n=965)  
 3' terminus relative to 3' stem of D-loop (n=39)

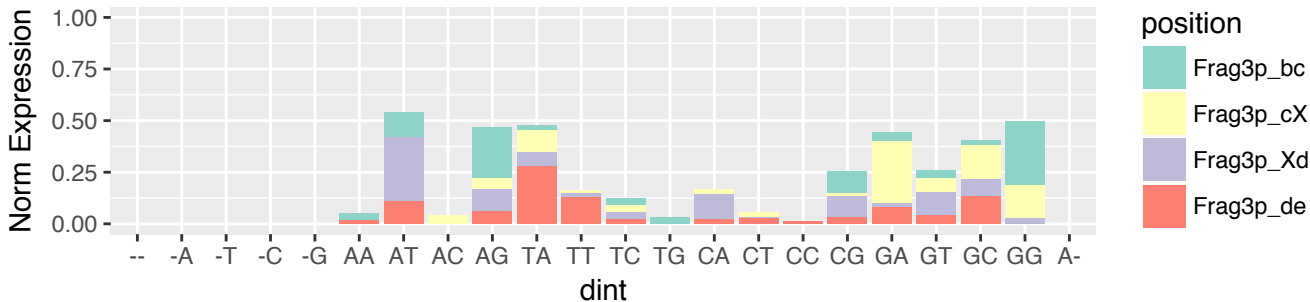



AITCGAProjects (n=3136)  
i-tRF & exclusive (n=965)  
3' terminus relative to 5' stem of A-loop (n=218)

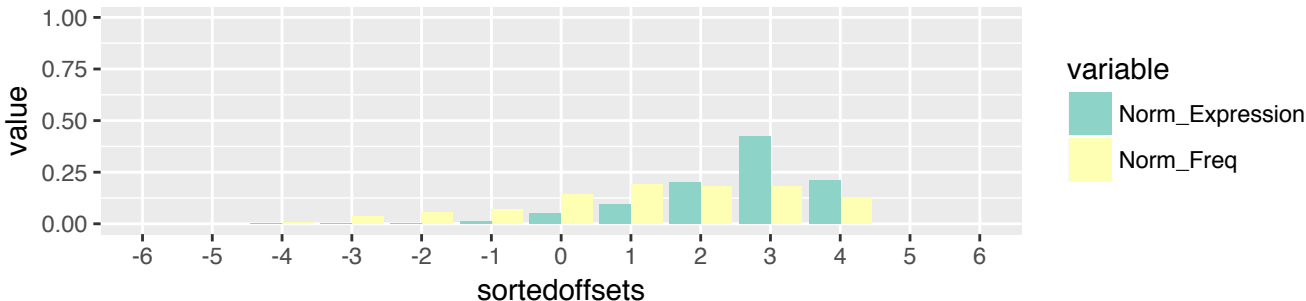

AITCGAProjects (n=3136)  
i-tRF & exclusive (n=965)  
3' terminus relative to 5' stem of A-loop (n=218)

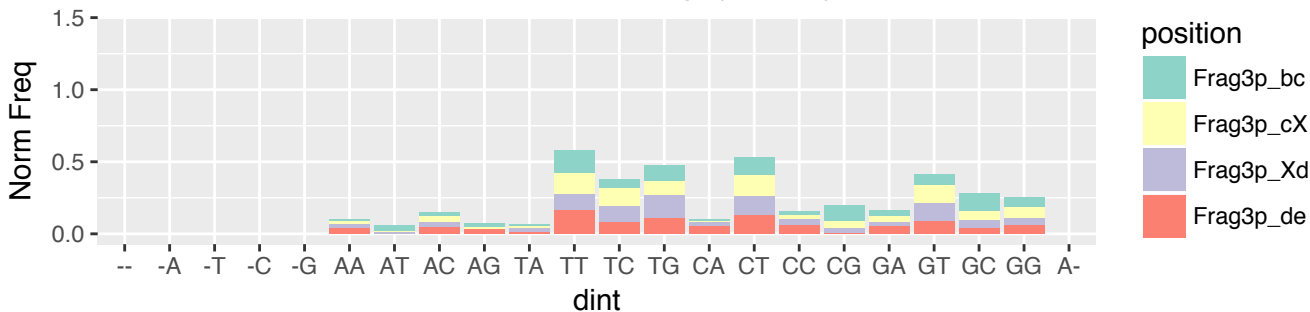

AITCGAProjects (n=3136)  
i-tRF & exclusive (n=965)  
3' terminus relative to 5' stem of A-loop (n=218)

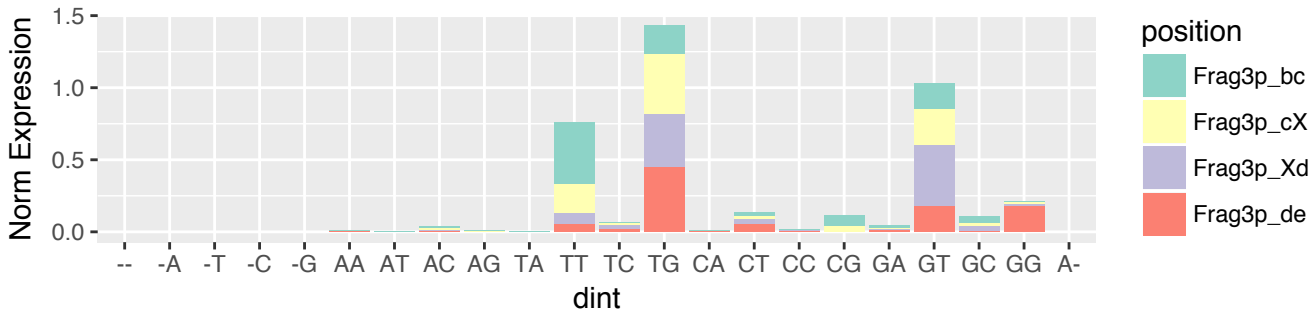

AllTCGAProjects (n=3136)  
 i-tRF & exclusive (n=965)  
 3' terminus relative to 3' stem of A-loop (n=204)

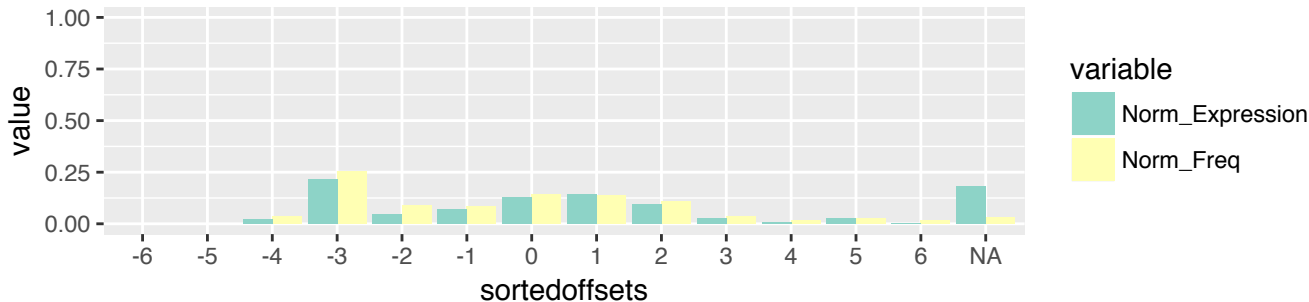

AllTCGAProjects (n=3136)  
 i-tRF & exclusive (n=965)  
 3' terminus relative to 3' stem of A-loop (n=204)

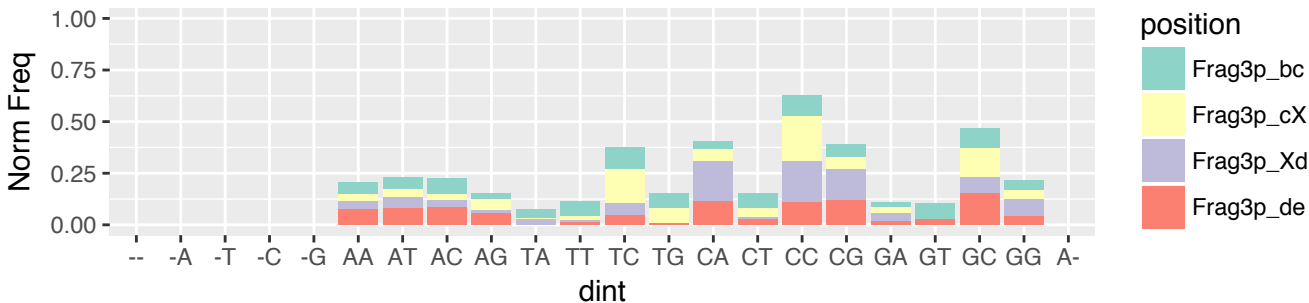

AllTCGAProjects (n=3136)  
 i-tRF & exclusive (n=965)  
 3' terminus relative to 3' stem of A-loop (n=204)

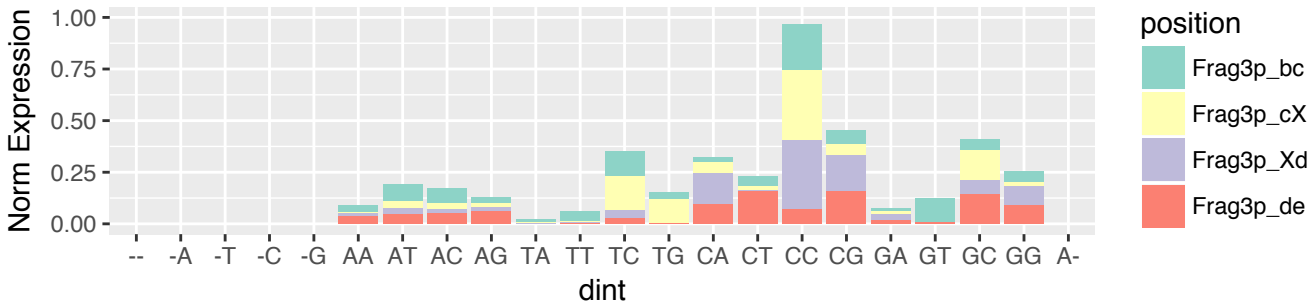

AllTCGAProjects (n=3136)  
 i-tRF & exclusive (n=965)  
 3' terminus relative to 5' stem of T-loop (n=288)

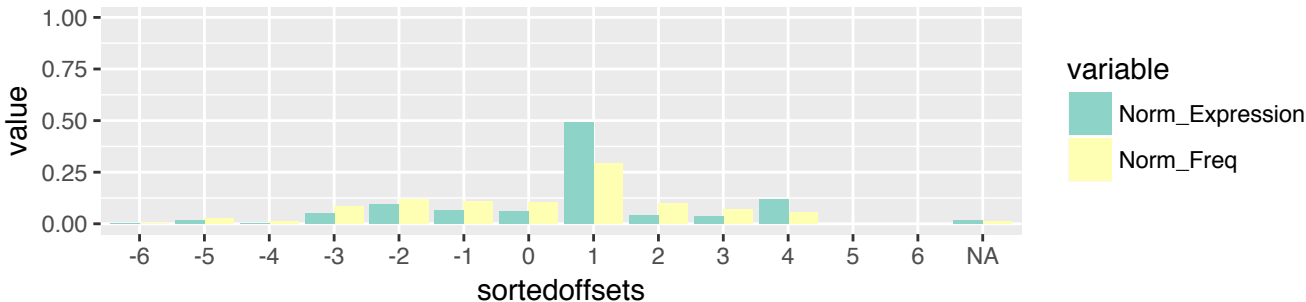

AllTCGAProjects (n=3136)  
 i-tRF & exclusive (n=965)  
 3' terminus relative to 5' stem of T-loop (n=288)

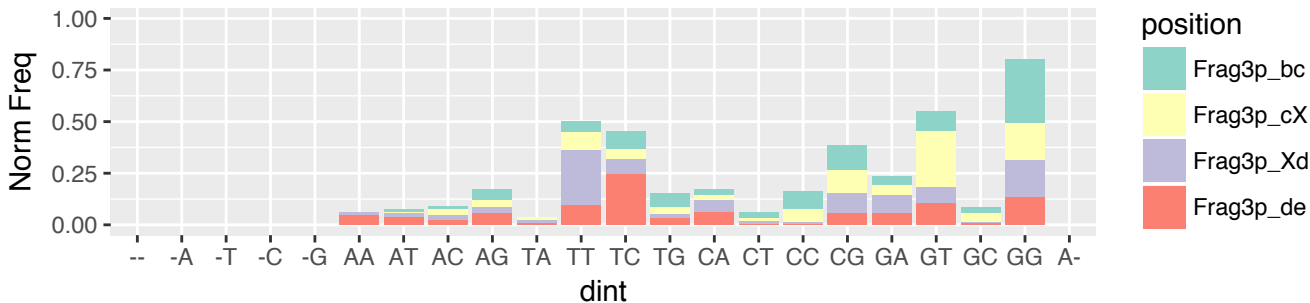

AllTCGAProjects (n=3136)  
 i-tRF & exclusive (n=965)  
 3' terminus relative to 5' stem of T-loop (n=288)

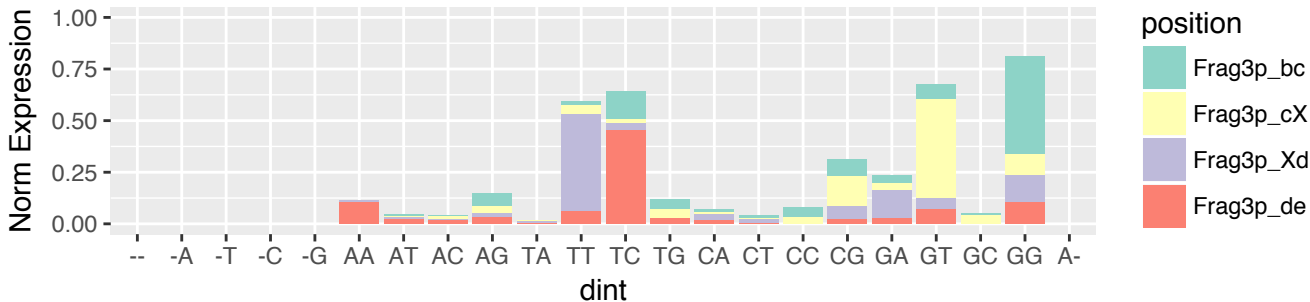

AllTCGAProjects (n=3136)  
i-tRF & exclusive (n=965)  
3' terminus relative to 3' stem of T-loop (n=116)

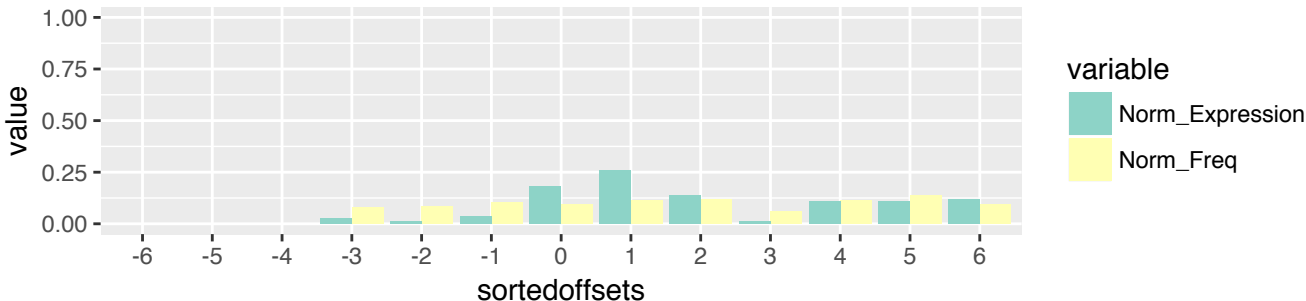

AllTCGAProjects (n=3136)  
i-tRF & exclusive (n=965)  
3' terminus relative to 3' stem of T-loop (n=116)

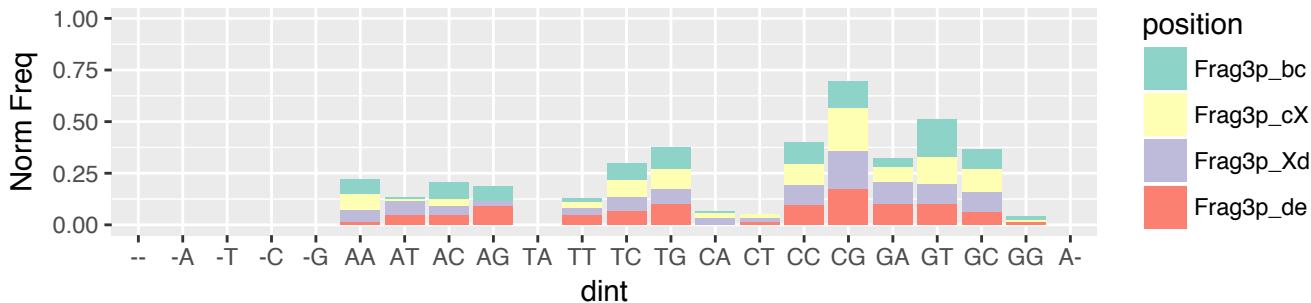

AllTCGAProjects (n=3136)  
i-tRF & exclusive (n=965)  
3' terminus relative to 3' stem of T-loop (n=116)

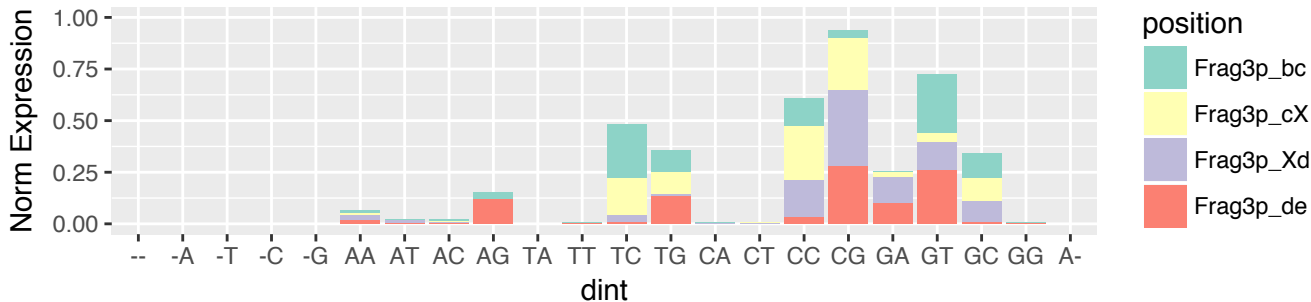

AITCGAProjects (n=3136)  
 i-tRF & exclusive (n=965)  
 3' terminus relative to 3' end of the tRNA (n=113)

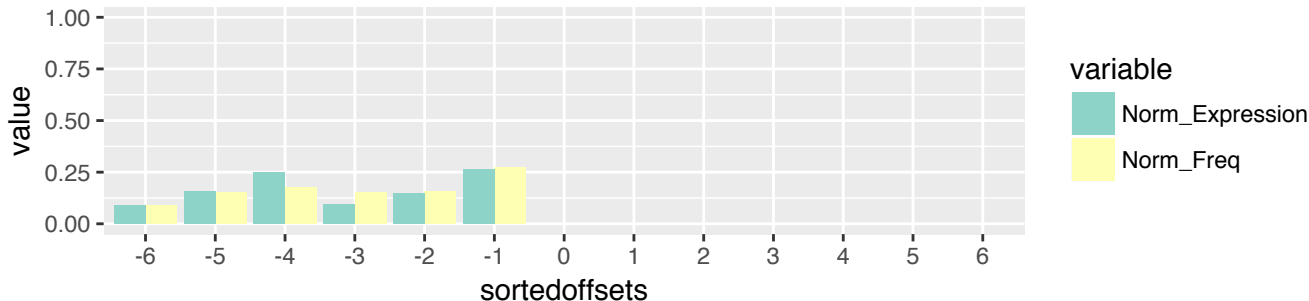

AITCGAProjects (n=3136)  
 i-tRF & exclusive (n=965)  
 3' terminus relative to 3' end of the tRNA (n=113)

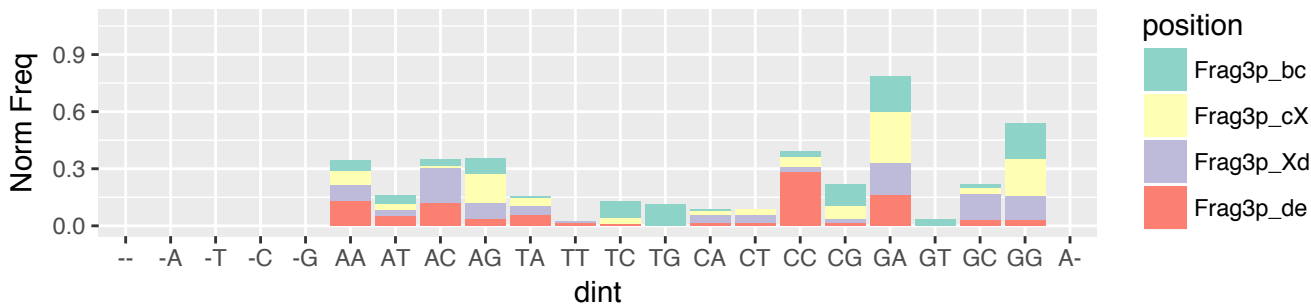

AITCGAProjects (n=3136)  
 i-tRF & exclusive (n=965)  
 3' terminus relative to 3' end of the tRNA (n=113)

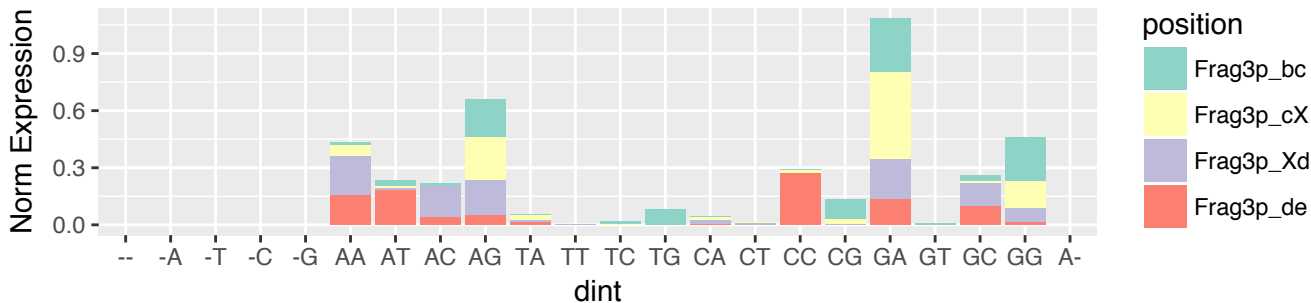

AITCGAProjects (n=3136)  
3'-tRF & exclusive (n=564)  
5' terminus relative to 3' stem of A-loop (n=2)

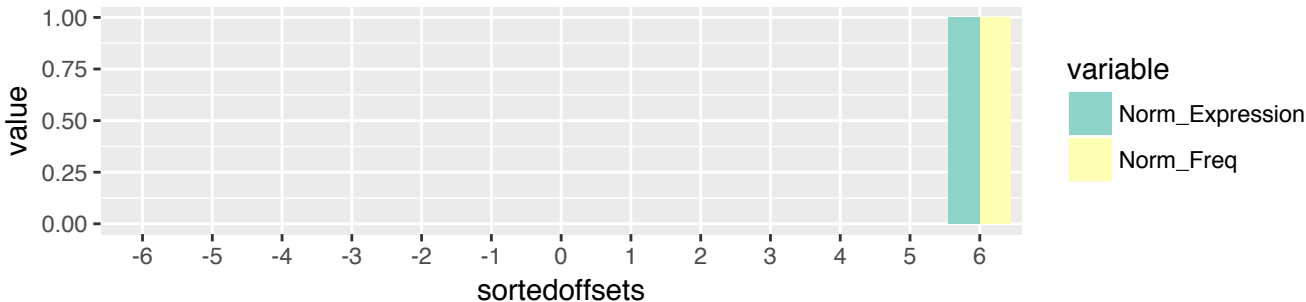

AITCGAProjects (n=3136)  
3'-tRF & exclusive (n=564)  
5' terminus relative to 3' stem of A-loop (n=2)

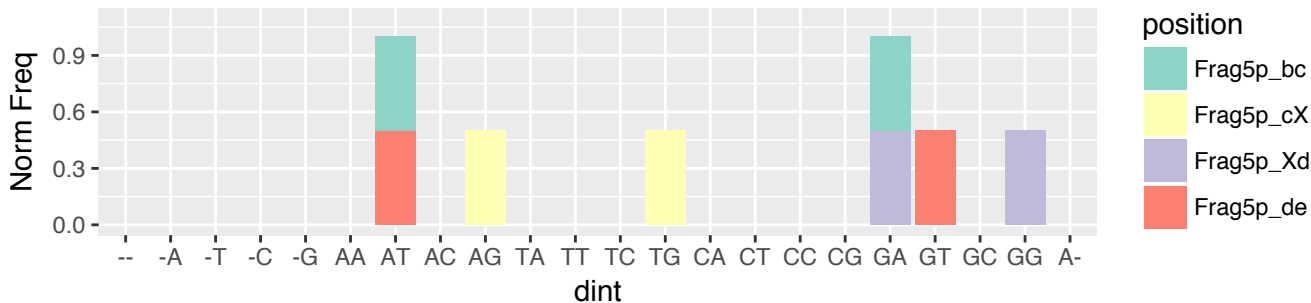

AITCGAProjects (n=3136)  
3'-tRF & exclusive (n=564)  
5' terminus relative to 3' stem of A-loop (n=2)

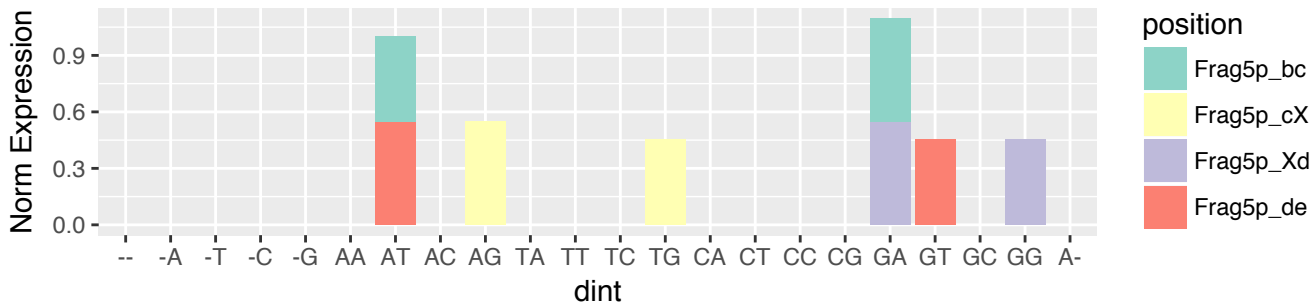

AllTCGAProjects (n=3136)  
 3'-tRF & exclusive (n=564)  
 5' terminus relative to 5' stem of T-loop (n=413)

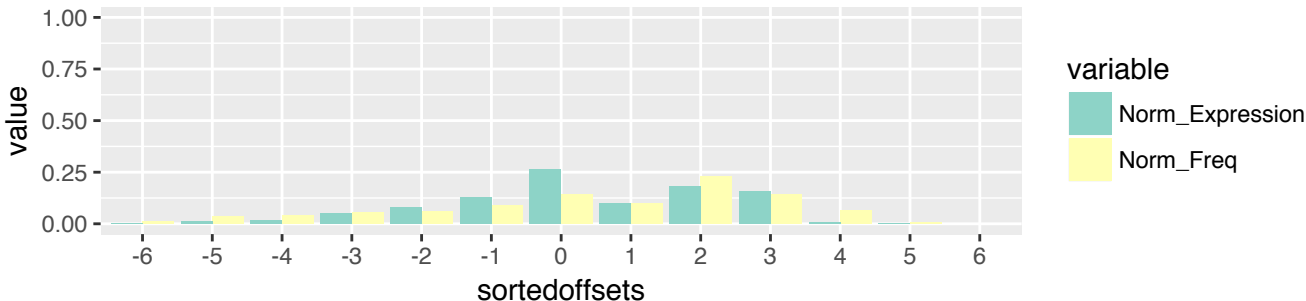

AllTCGAProjects (n=3136)  
 3'-tRF & exclusive (n=564)  
 5' terminus relative to 5' stem of T-loop (n=413)

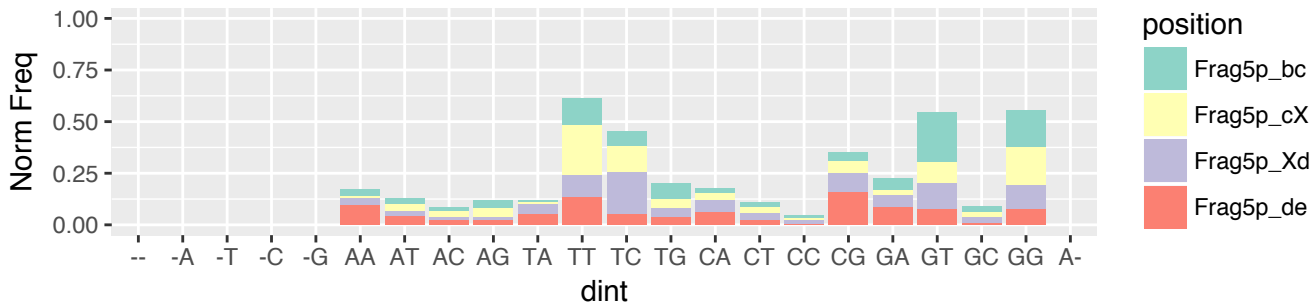

AllTCGAProjects (n=3136)  
 3'-tRF & exclusive (n=564)  
 5' terminus relative to 5' stem of T-loop (n=413)

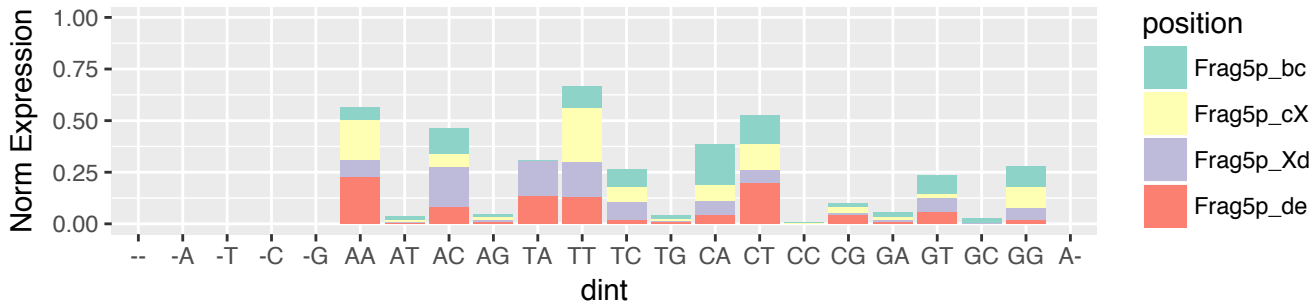

AllTCGAProjects (n=3136)  
 3'-tRF & exclusive (n=564)  
 5' terminus relative to 3' stem of T-loop (n=152)

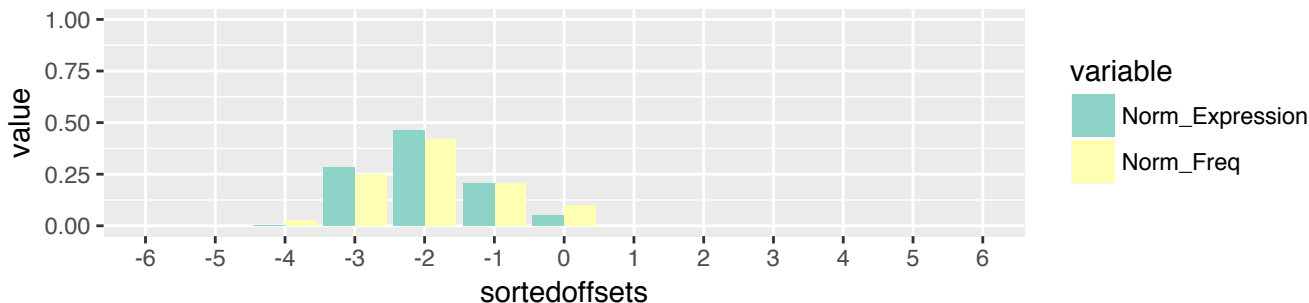

AllTCGAProjects (n=3136)  
 3'-tRF & exclusive (n=564)  
 5' terminus relative to 3' stem of T-loop (n=152)

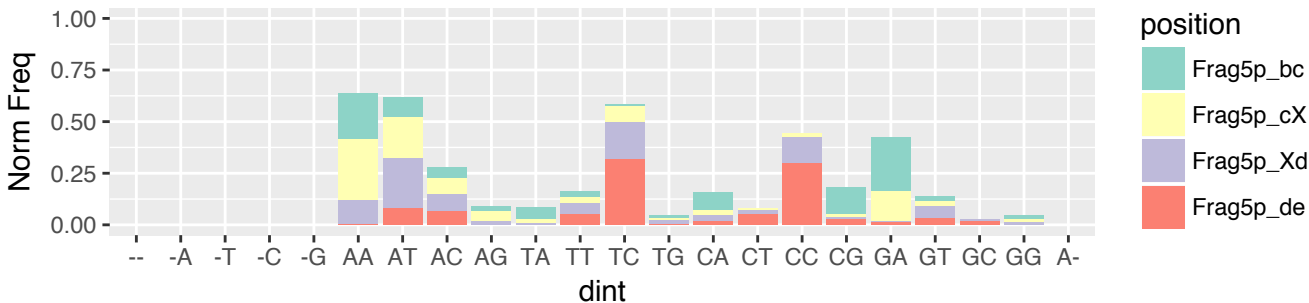

AllTCGAProjects (n=3136)  
 3'-tRF & exclusive (n=564)  
 5' terminus relative to 3' stem of T-loop (n=152)

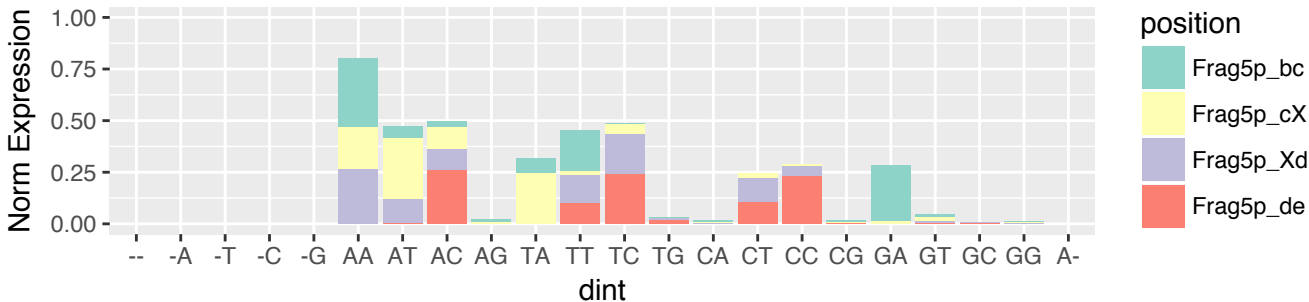



AllTCGAProjects (n=3136)  
 3'-tRF & exclusive (n=564)  
 3' terminus relative to 3' end of the tRNA (n=564)

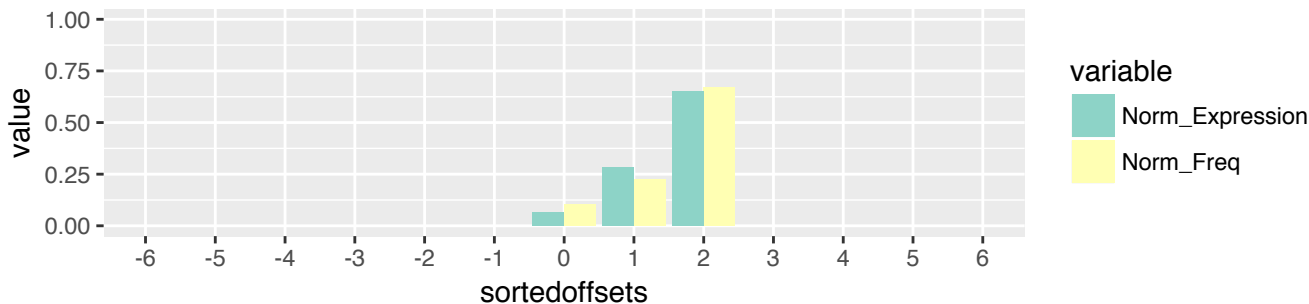

AllTCGAProjects (n=3136)  
 3'-tRF & exclusive (n=564)  
 3' terminus relative to 3' end of the tRNA (n=564)

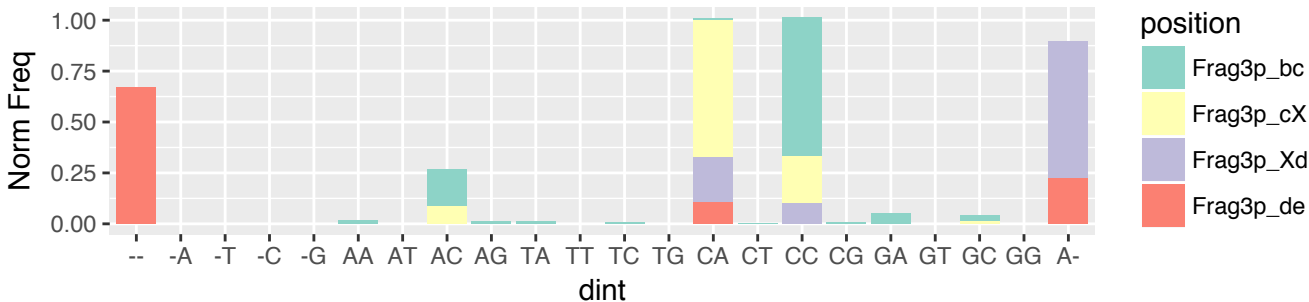

AllTCGAProjects (n=3136)  
 3'-tRF & exclusive (n=564)  
 3' terminus relative to 3' end of the tRNA (n=564)

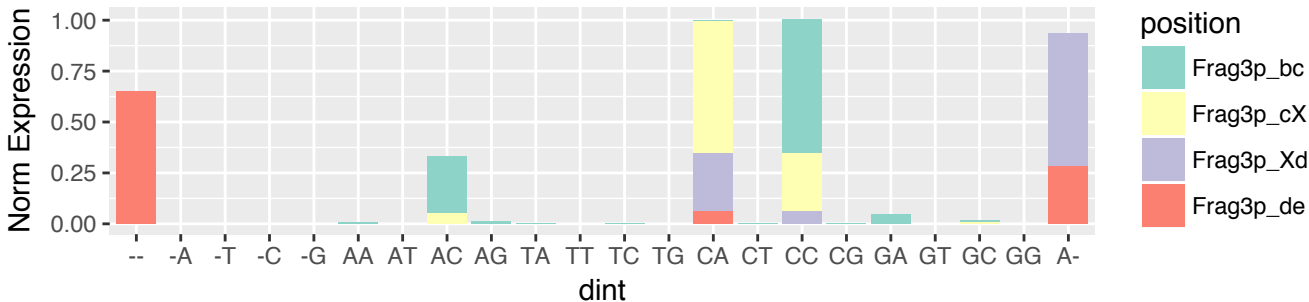

ACC (n=1068)  
 5'-half & exclusive (n=5)  
 5' terminus relative to 5' end of the tRNA (n=5)

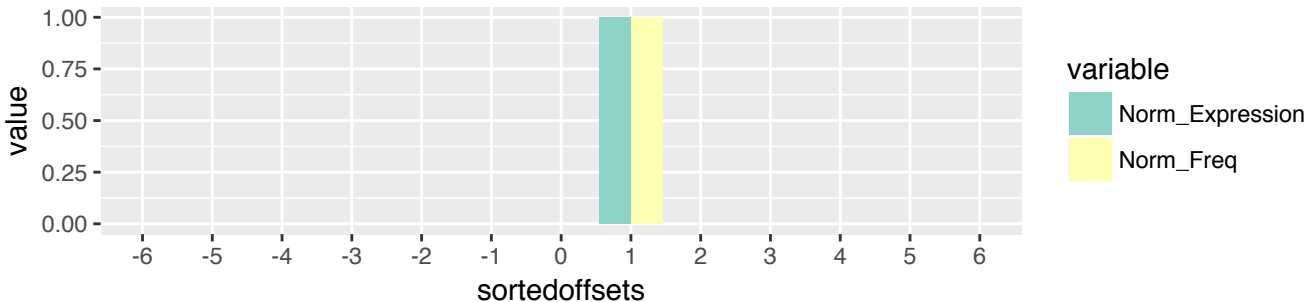

ACC (n=1068)  
 5'-half & exclusive (n=5)  
 5' terminus relative to 5' end of the tRNA (n=5)

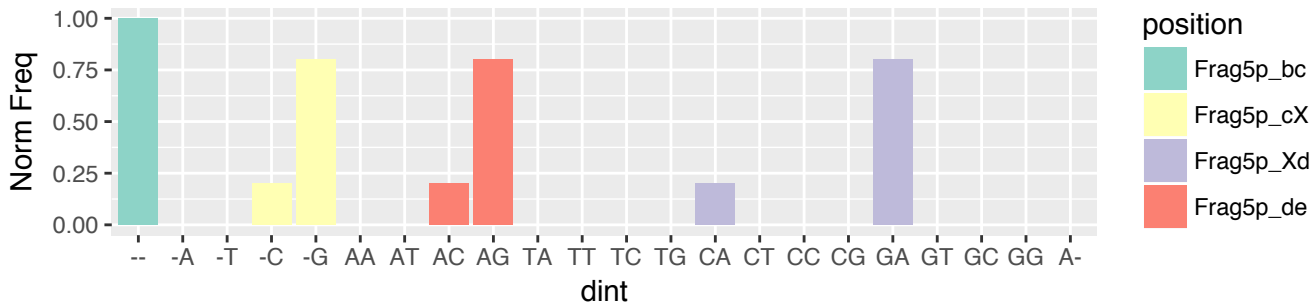

ACC (n=1068)  
 5'-half & exclusive (n=5)  
 5' terminus relative to 5' end of the tRNA (n=5)

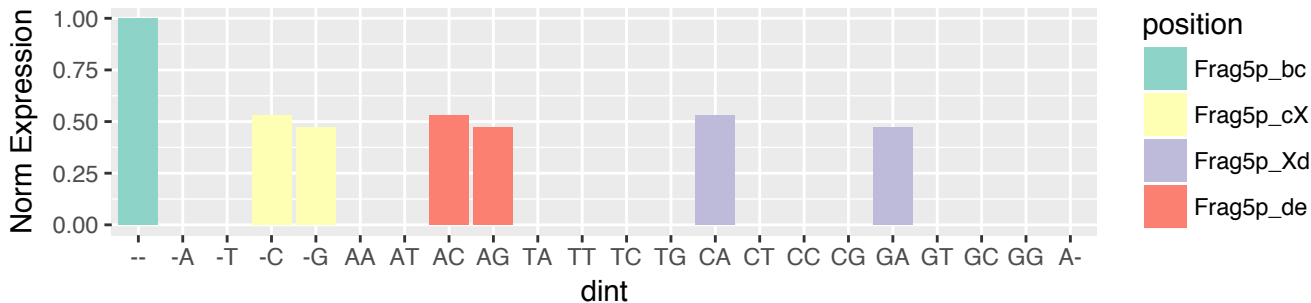

ACC (n=1068)  
 5'-half & exclusive (n=5)  
 3' terminus relative to 5' stem of A-loop (n=5)

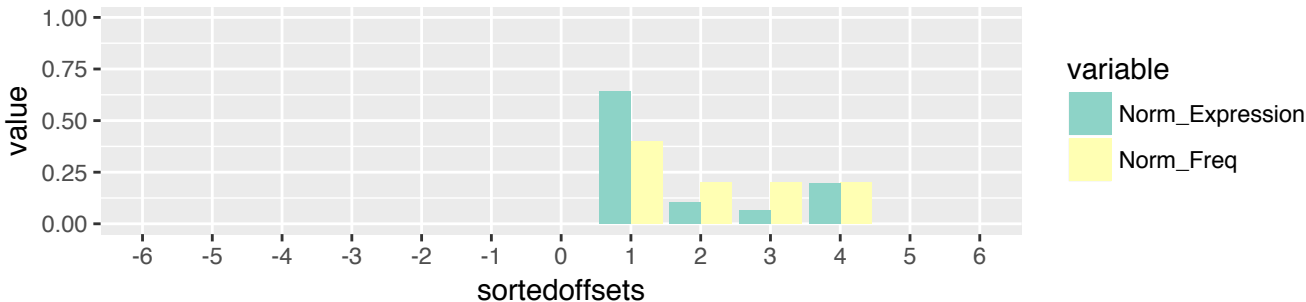

ACC (n=1068)  
 5'-half & exclusive (n=5)  
 3' terminus relative to 5' stem of A-loop (n=5)

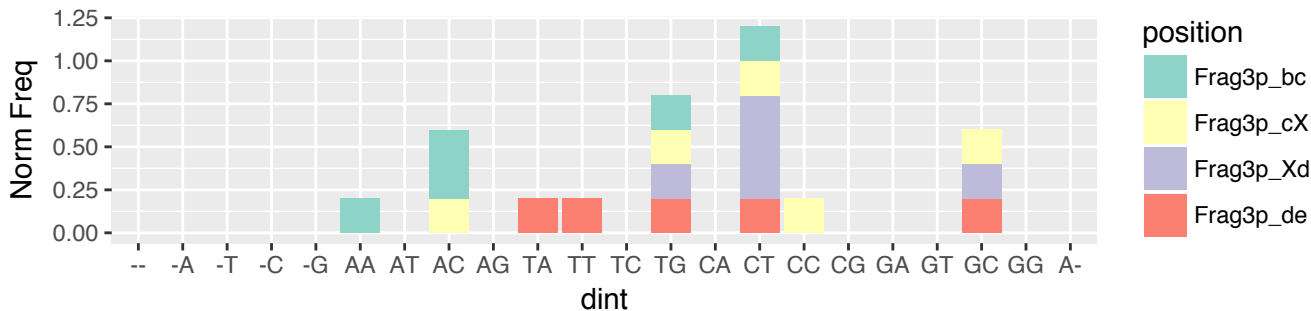

ACC (n=1068)  
 5'-half & exclusive (n=5)  
 3' terminus relative to 5' stem of A-loop (n=5)

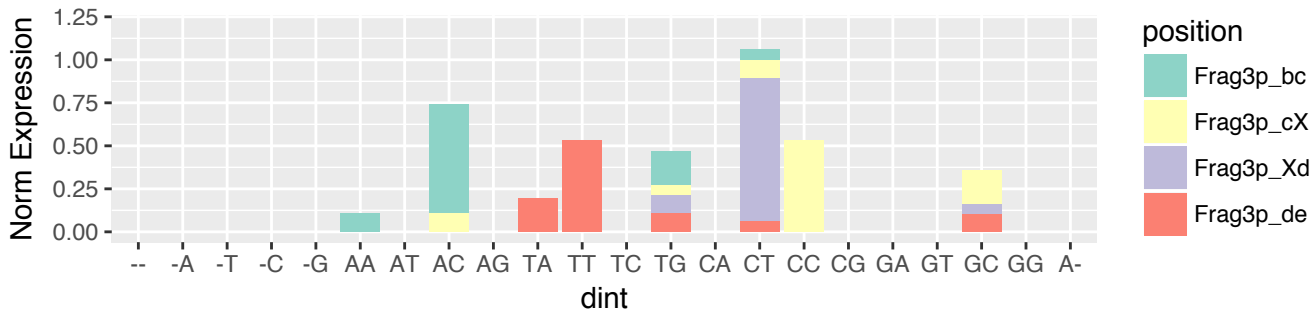

ACC (n=1068)  
 5'-tRF & exclusive (n=138)  
 5' terminus relative to 5' end of the tRNA (n=138)

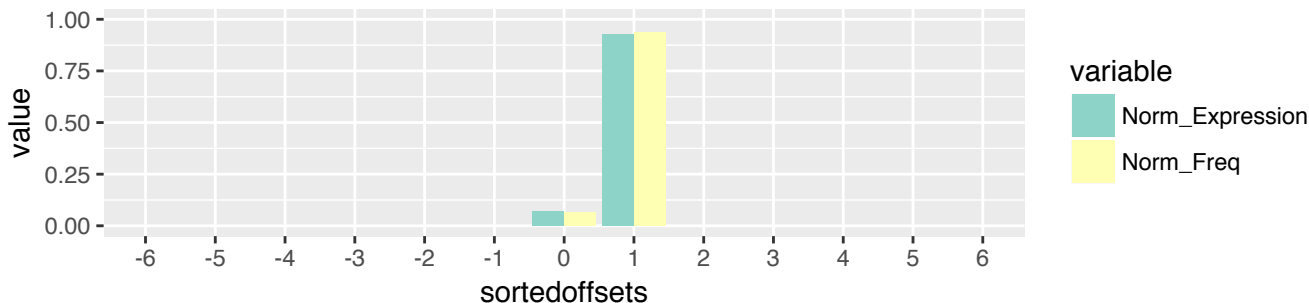

ACC (n=1068)  
 5'-tRF & exclusive (n=138)  
 5' terminus relative to 5' end of the tRNA (n=138)

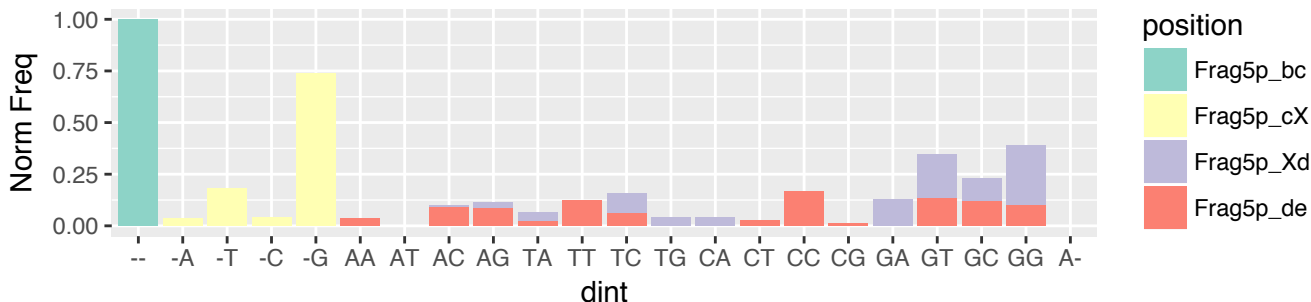

ACC (n=1068)  
 5'-tRF & exclusive (n=138)  
 5' terminus relative to 5' end of the tRNA (n=138)

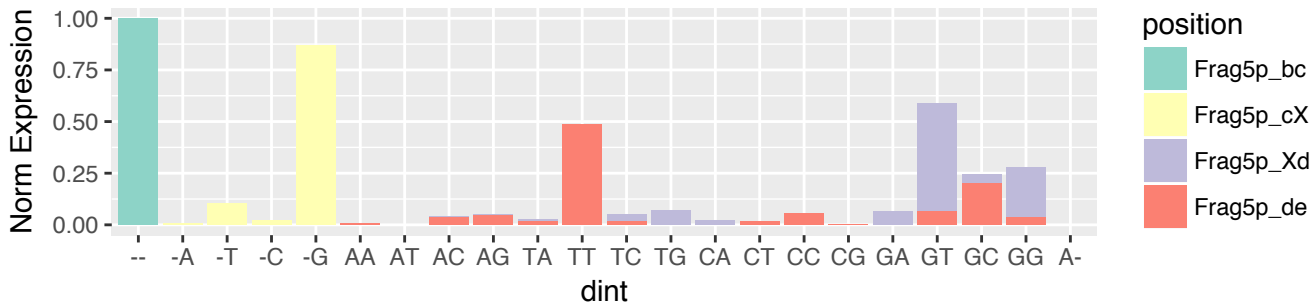

ACC (n=1068)  
 5'-tRF & exclusive (n=138)  
 3' terminus relative to 5' stem of D-loop (n=3)

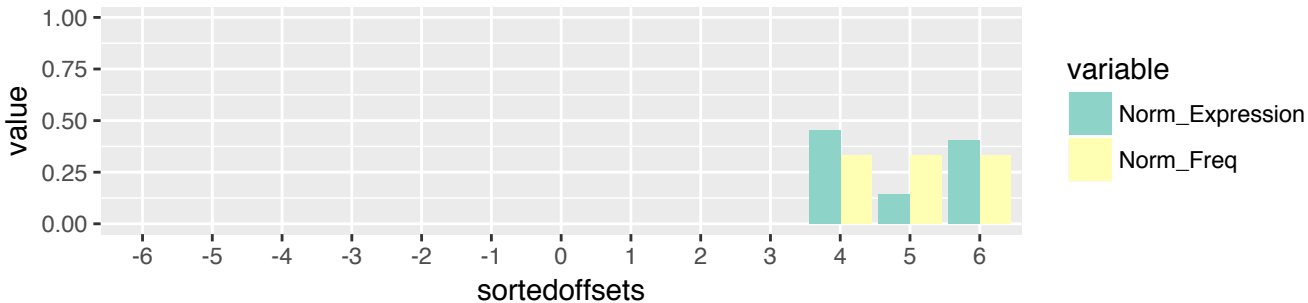

ACC (n=1068)  
 5'-tRF & exclusive (n=138)  
 3' terminus relative to 5' stem of D-loop (n=3)

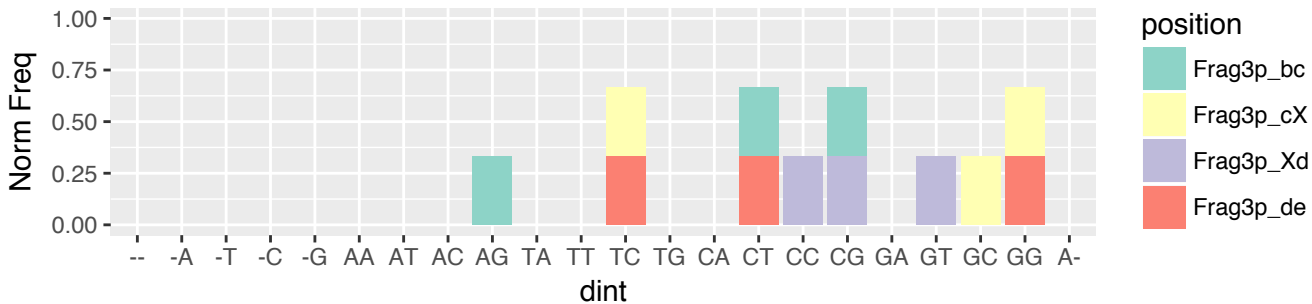

ACC (n=1068)  
 5'-tRF & exclusive (n=138)  
 3' terminus relative to 5' stem of D-loop (n=3)

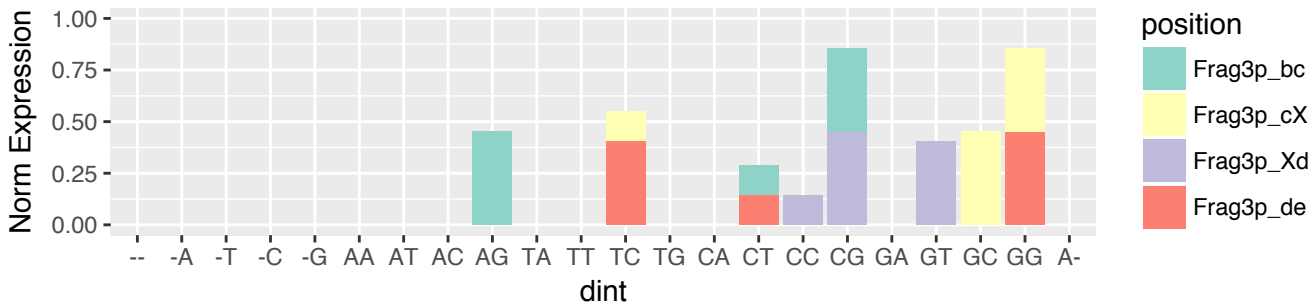

ACC (n=1068)  
 5'-tRF & exclusive (n=138)  
 3' terminus relative to 3' stem of D-loop (n=114)

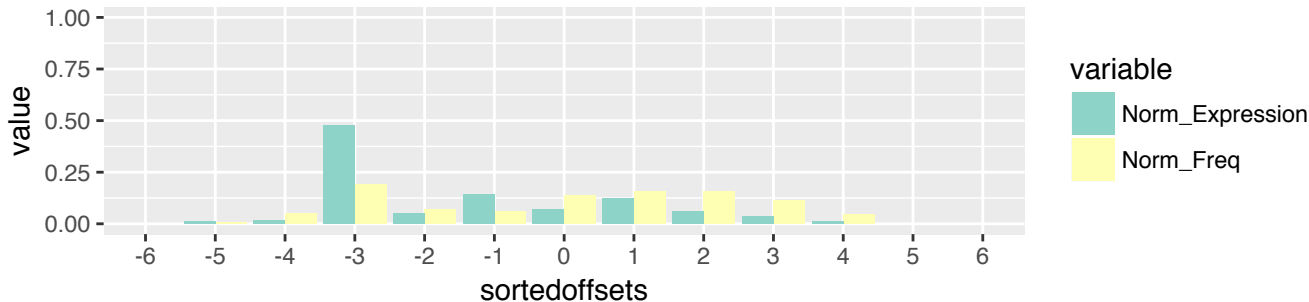

ACC (n=1068)  
 5'-tRF & exclusive (n=138)  
 3' terminus relative to 3' stem of D-loop (n=114)

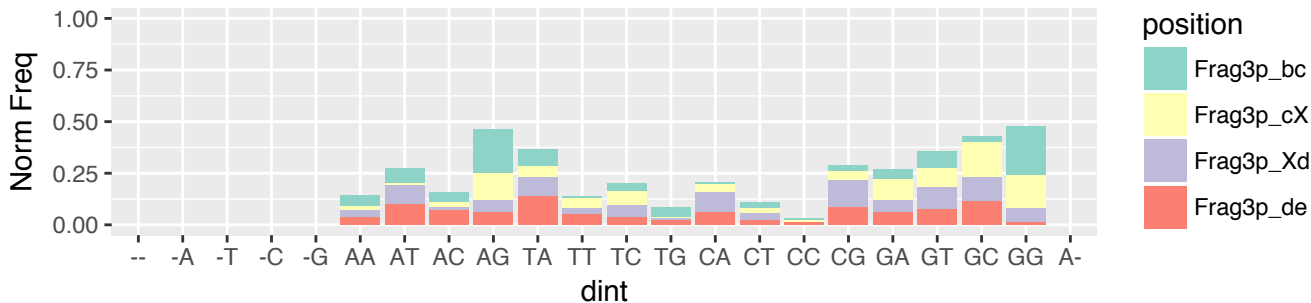

ACC (n=1068)  
 5'-tRF & exclusive (n=138)  
 3' terminus relative to 3' stem of D-loop (n=114)

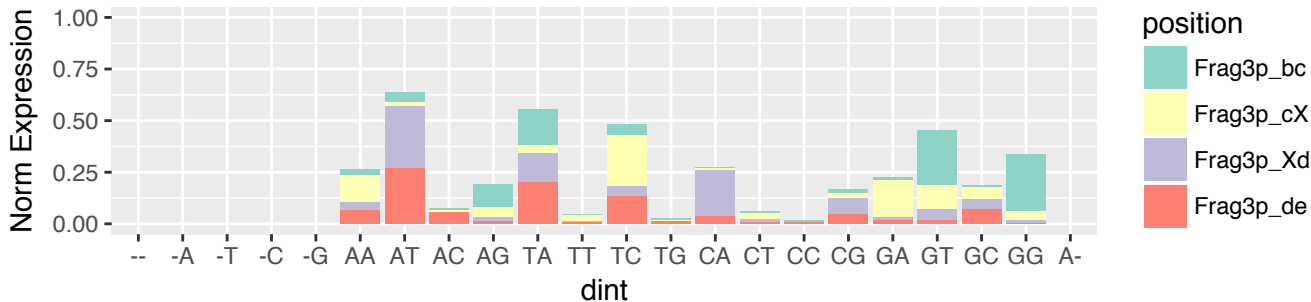

ACC (n=1068)  
 5'-tRF & exclusive (n=138)  
 3' terminus relative to 5' stem of A-loop (n=15)

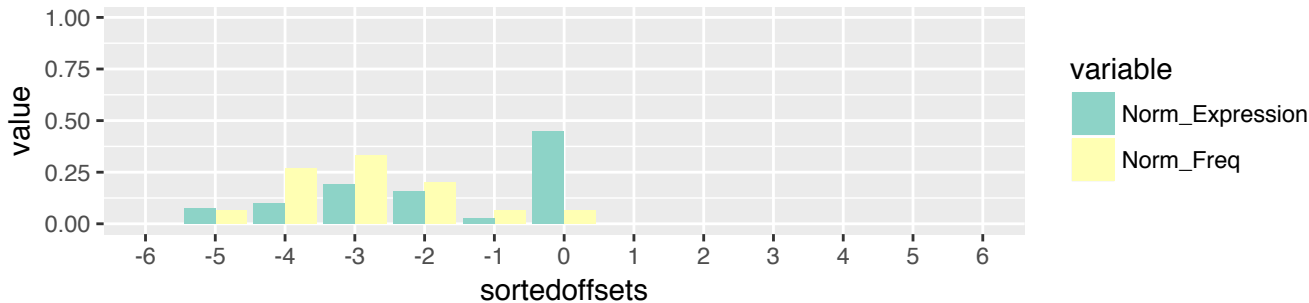

ACC (n=1068)  
 5'-tRF & exclusive (n=138)  
 3' terminus relative to 5' stem of A-loop (n=15)

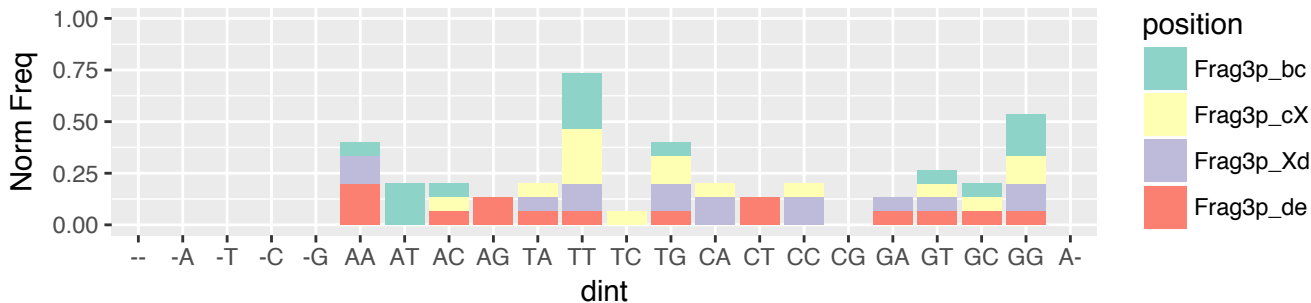

ACC (n=1068)  
 5'-tRF & exclusive (n=138)  
 3' terminus relative to 5' stem of A-loop (n=15)

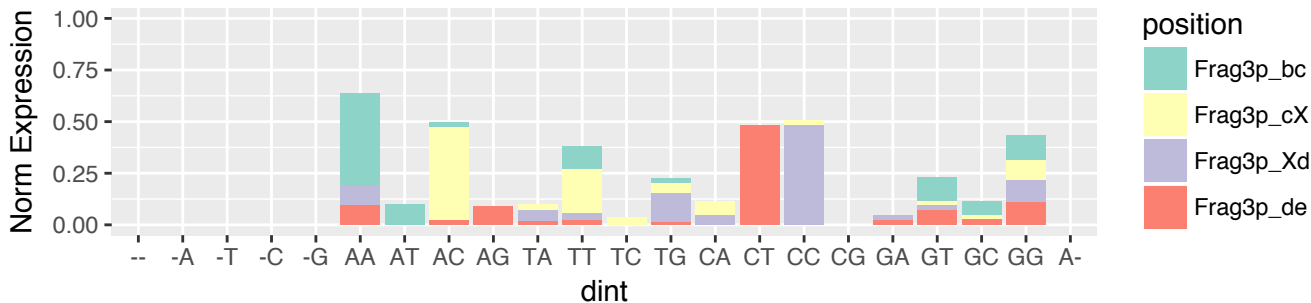

ACC (n=1068)  
 5'-tRF & exclusive (n=138)  
 3' terminus relative to 3' stem of A-loop (n=6)

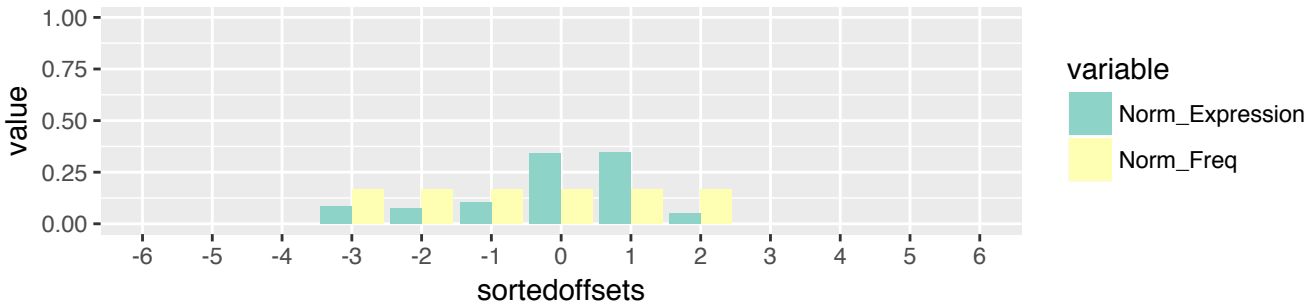

ACC (n=1068)  
 5'-tRF & exclusive (n=138)  
 3' terminus relative to 3' stem of A-loop (n=6)



ACC (n=1068)  
 5'-tRF & exclusive (n=138)  
 3' terminus relative to 3' stem of A-loop (n=6)

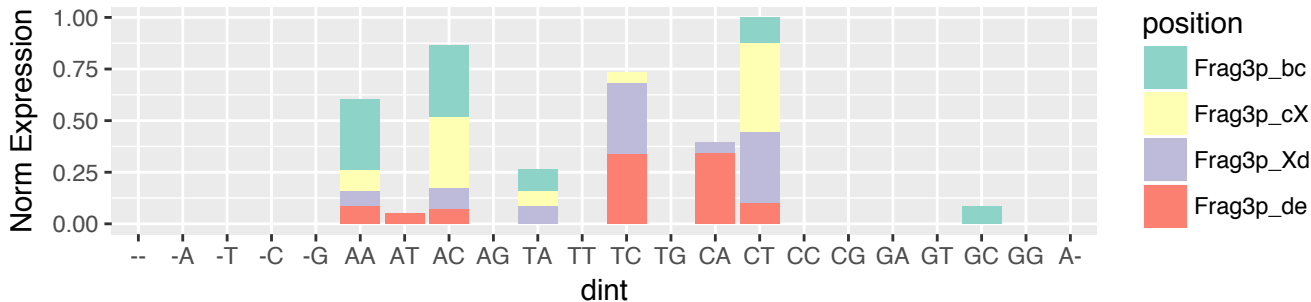



ACC (n=1068)  
 i-tRF & exclusive (n=288)  
 5' terminus relative to 5' end of the tRNA (n=17)

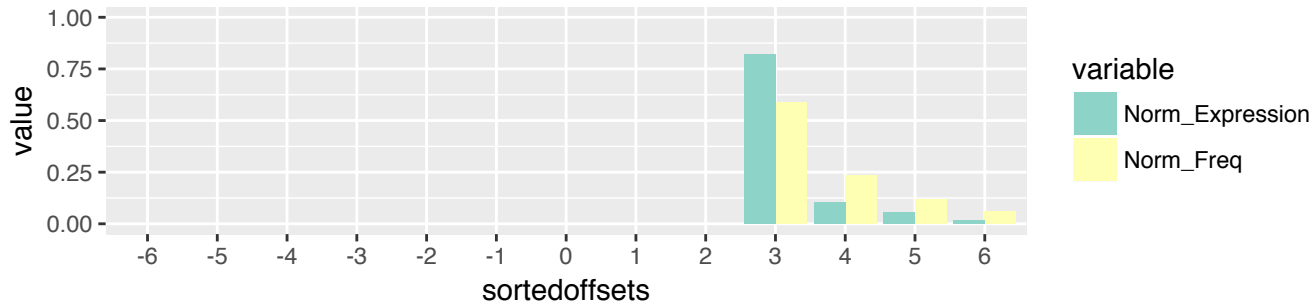

ACC (n=1068)  
 i-tRF & exclusive (n=288)  
 5' terminus relative to 5' end of the tRNA (n=17)

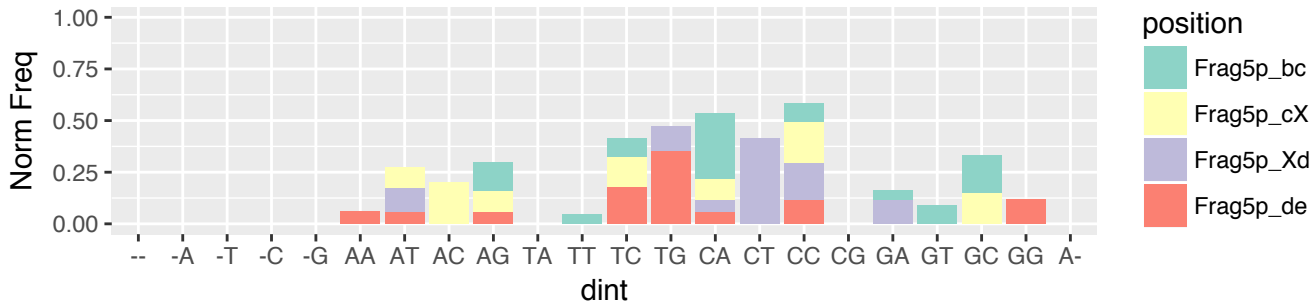

ACC (n=1068)  
 i-tRF & exclusive (n=288)  
 5' terminus relative to 5' end of the tRNA (n=17)

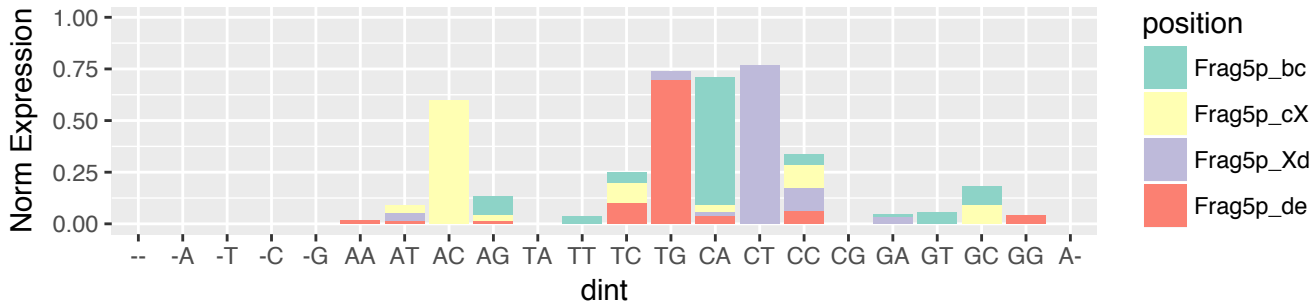

ACC (n=1068)  
i-tRF & exclusive (n=288)  
5' terminus relative to 5' stem of D-loop (n=64)

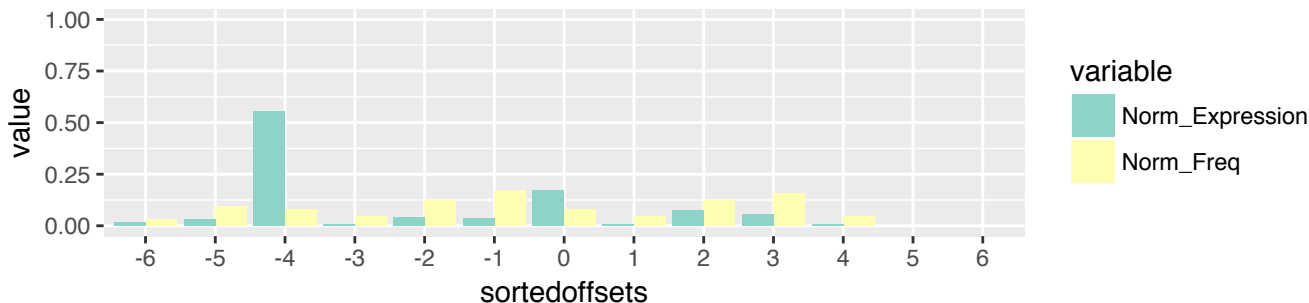

ACC (n=1068)  
i-tRF & exclusive (n=288)  
5' terminus relative to 5' stem of D-loop (n=64)

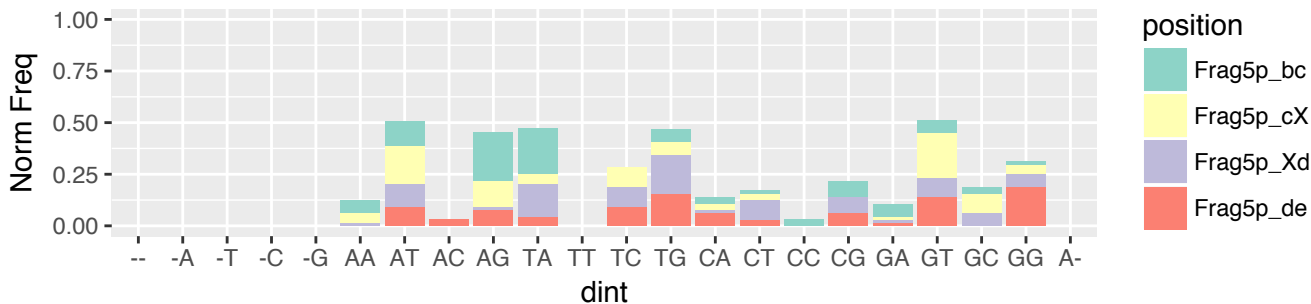

ACC (n=1068)  
i-tRF & exclusive (n=288)  
5' terminus relative to 5' stem of D-loop (n=64)

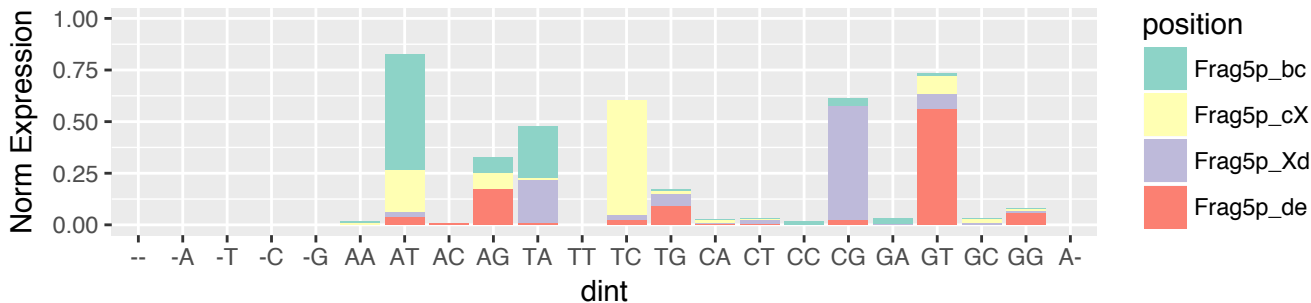

ACC (n=1068)  
 i-tRF & exclusive (n=288)  
 5' terminus relative to 3' stem of D-loop (n=9)

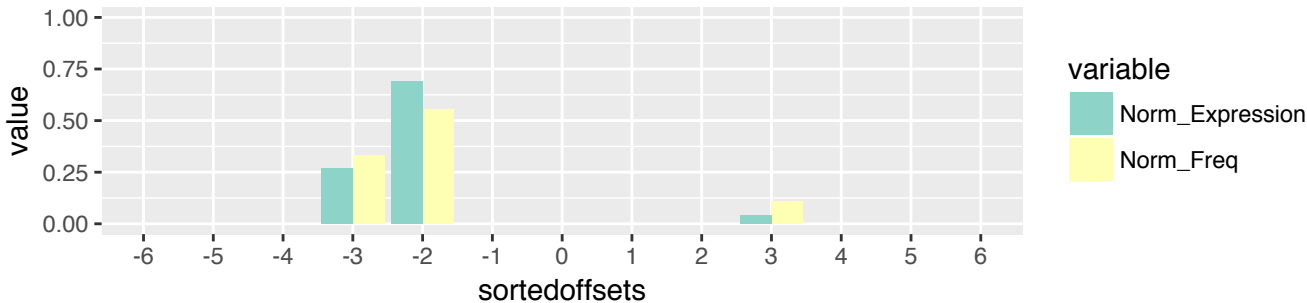

ACC (n=1068)  
 i-tRF & exclusive (n=288)  
 5' terminus relative to 3' stem of D-loop (n=9)

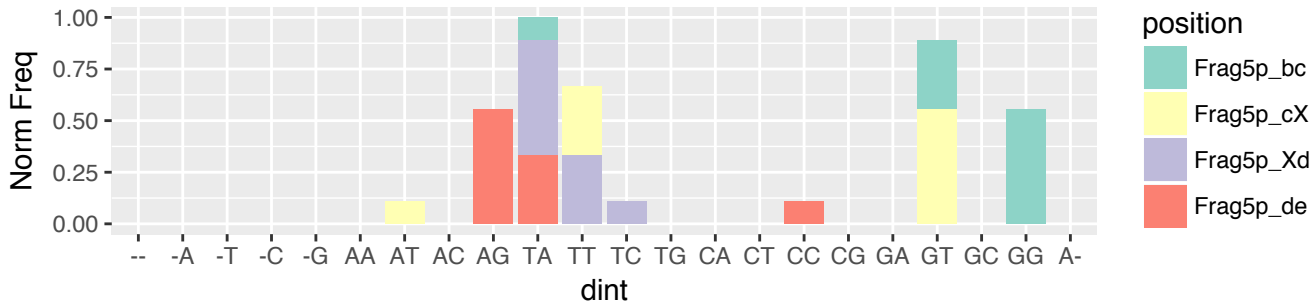

ACC (n=1068)  
 i-tRF & exclusive (n=288)  
 5' terminus relative to 3' stem of D-loop (n=9)

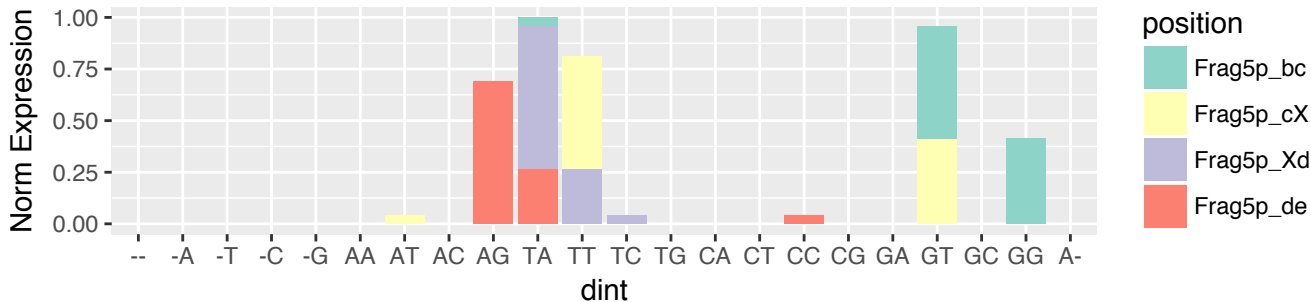

ACC (n=1068)  
 i-tRF & exclusive (n=288)  
 5' terminus relative to 5' stem of A-loop (n=67)

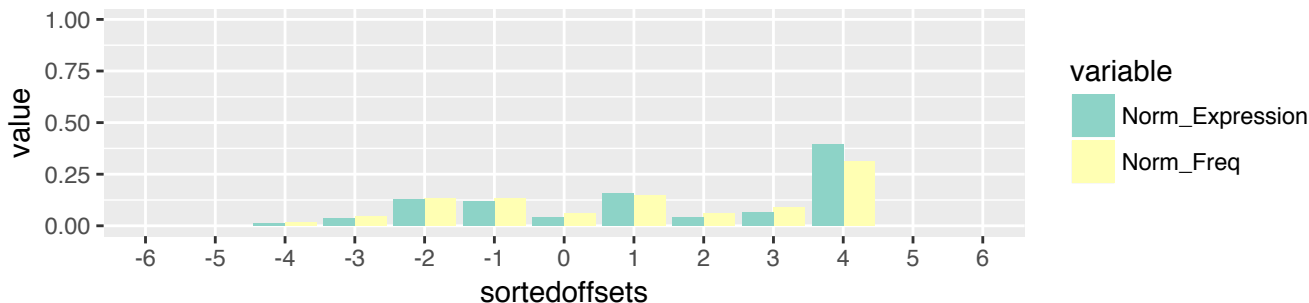

ACC (n=1068)  
 i-tRF & exclusive (n=288)  
 5' terminus relative to 5' stem of A-loop (n=67)

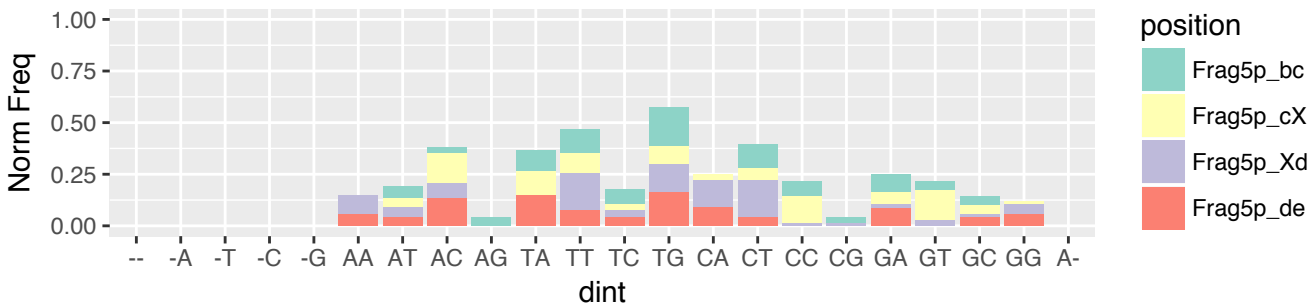

ACC (n=1068)  
 i-tRF & exclusive (n=288)  
 5' terminus relative to 5' stem of A-loop (n=67)

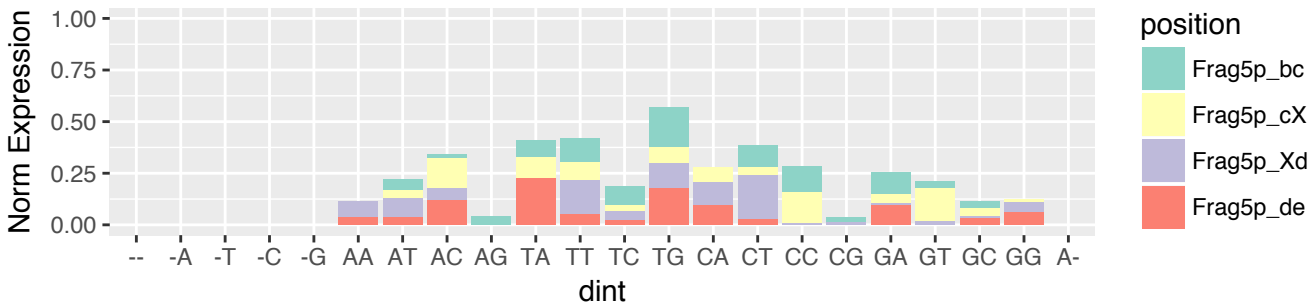

ACC (n=1068)  
i-tRF & exclusive (n=288)  
5' terminus relative to 3' stem of A-loop (n=98)

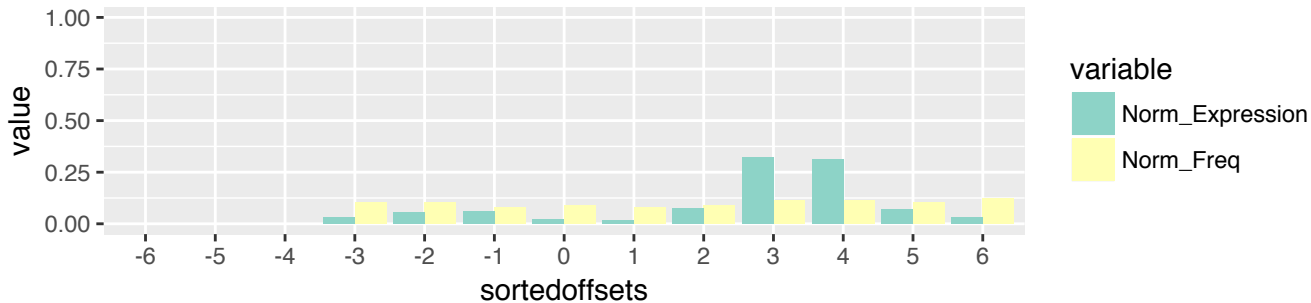

ACC (n=1068)  
i-tRF & exclusive (n=288)  
5' terminus relative to 3' stem of A-loop (n=98)

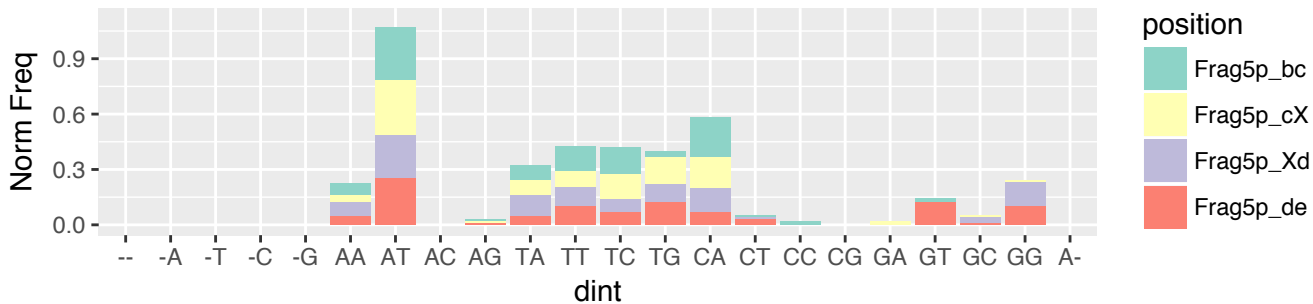

ACC (n=1068)  
i-tRF & exclusive (n=288)  
5' terminus relative to 3' stem of A-loop (n=98)

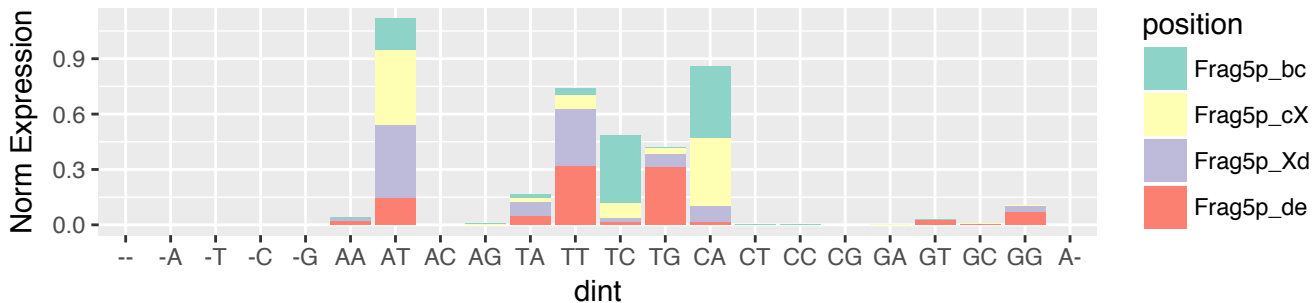

ACC (n=1068)  
 i-tRF & exclusive (n=288)  
 5' terminus relative to 5' stem of T-loop (n=33)

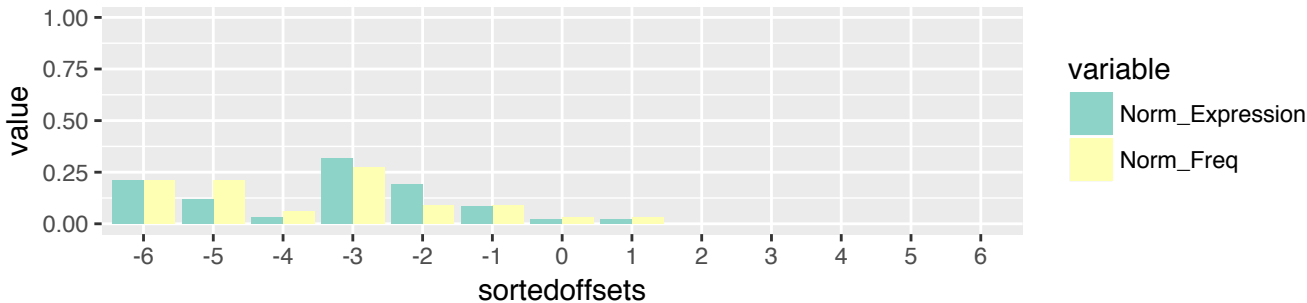

ACC (n=1068)  
 i-tRF & exclusive (n=288)  
 5' terminus relative to 5' stem of T-loop (n=33)

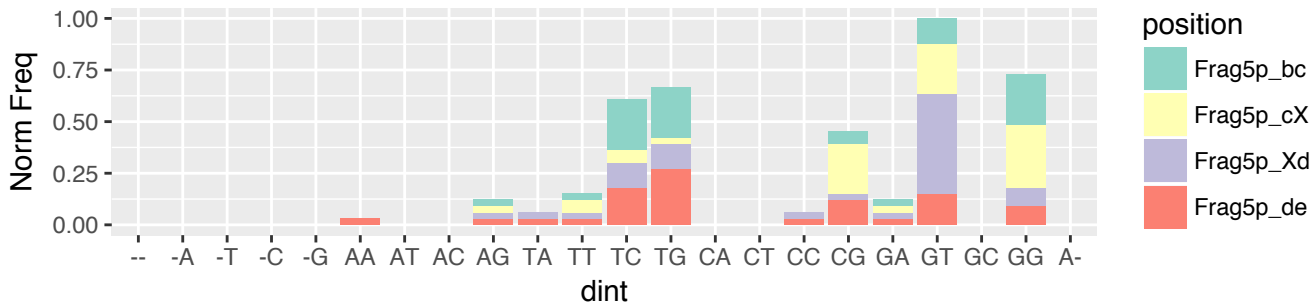

ACC (n=1068)  
 i-tRF & exclusive (n=288)  
 5' terminus relative to 5' stem of T-loop (n=33)

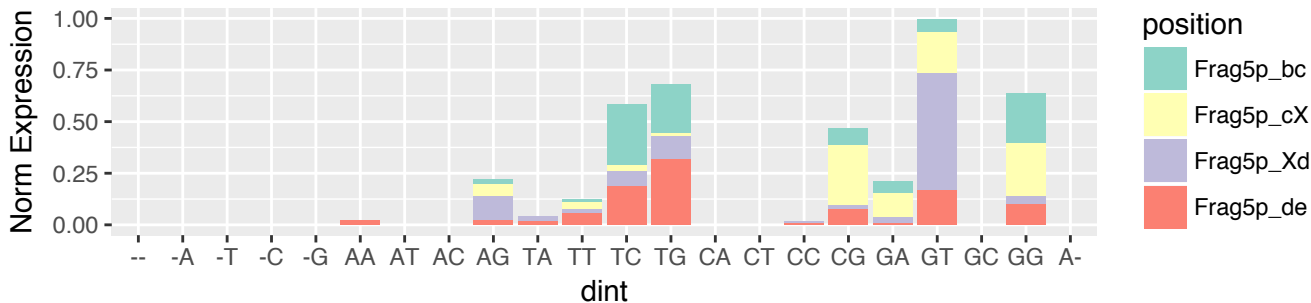

ACC (n=1068)  
i-tRF & exclusive (n=288)  
3' terminus relative to 3' stem of D-loop (n=1)

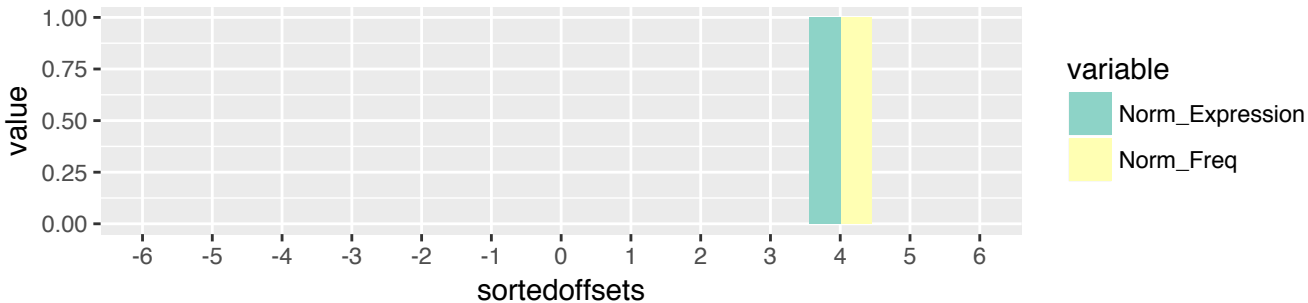

ACC (n=1068)  
i-tRF & exclusive (n=288)  
3' terminus relative to 3' stem of D-loop (n=1)

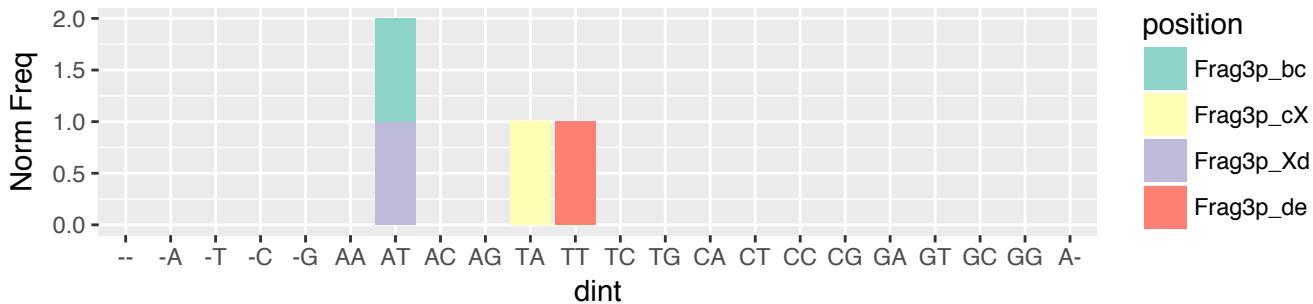

ACC (n=1068)  
i-tRF & exclusive (n=288)  
3' terminus relative to 3' stem of D-loop (n=1)

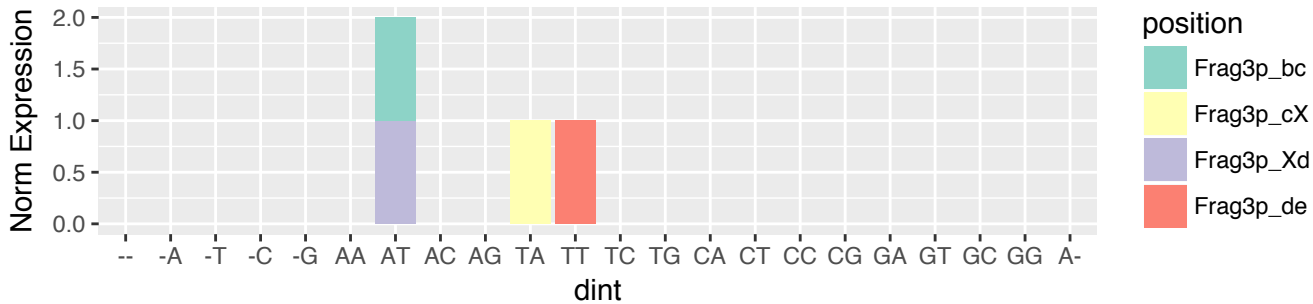

ACC (n=1068)  
i-tRF & exclusive (n=288)  
3' terminus relative to 5' stem of A-loop (n=56)

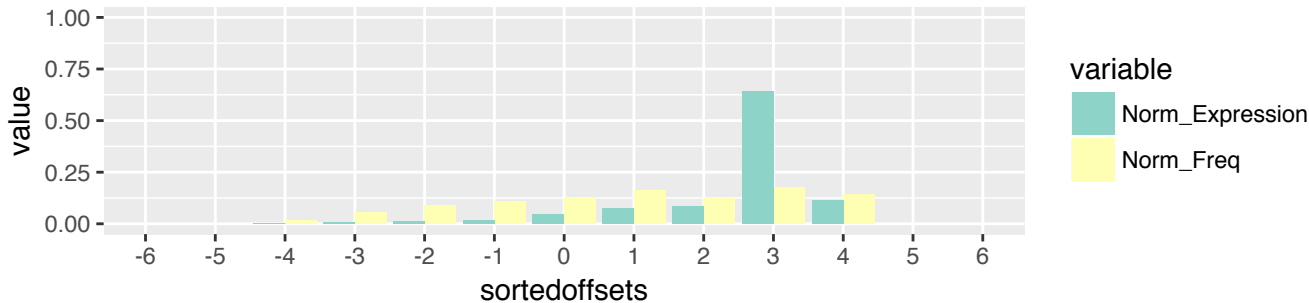

ACC (n=1068)  
i-tRF & exclusive (n=288)  
3' terminus relative to 5' stem of A-loop (n=56)

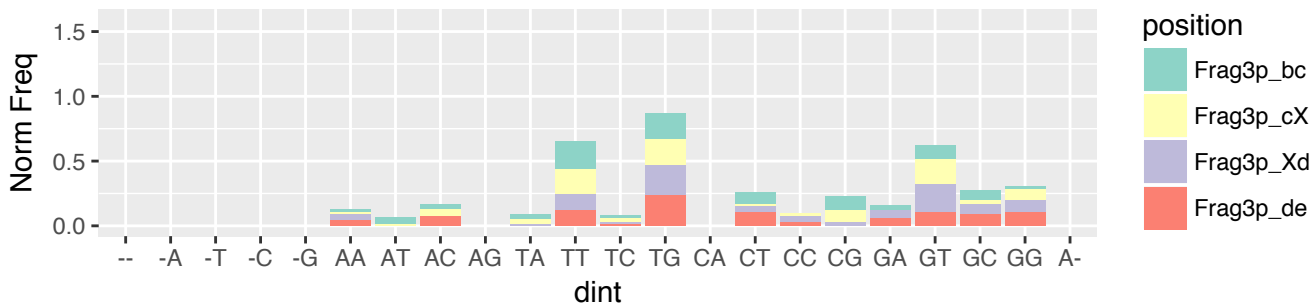

ACC (n=1068)  
i-tRF & exclusive (n=288)  
3' terminus relative to 5' stem of A-loop (n=56)

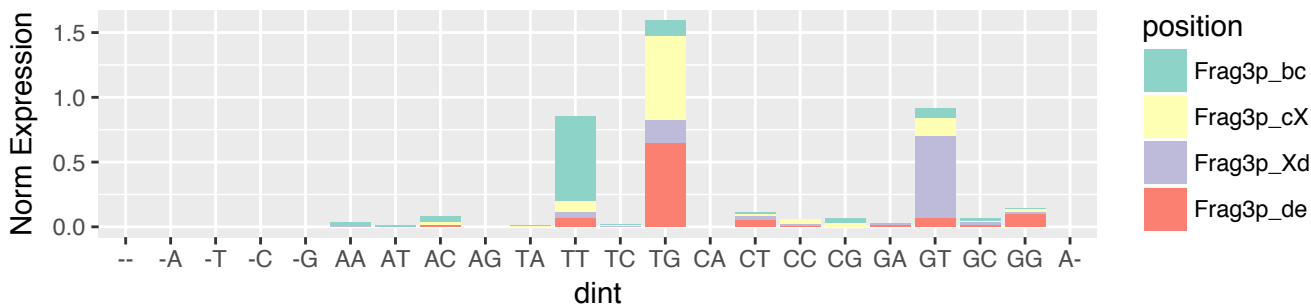



ACC (n=1068)  
 i-tRF & exclusive (n=288)  
 3' terminus relative to 3' stem of A-loop (n=34)

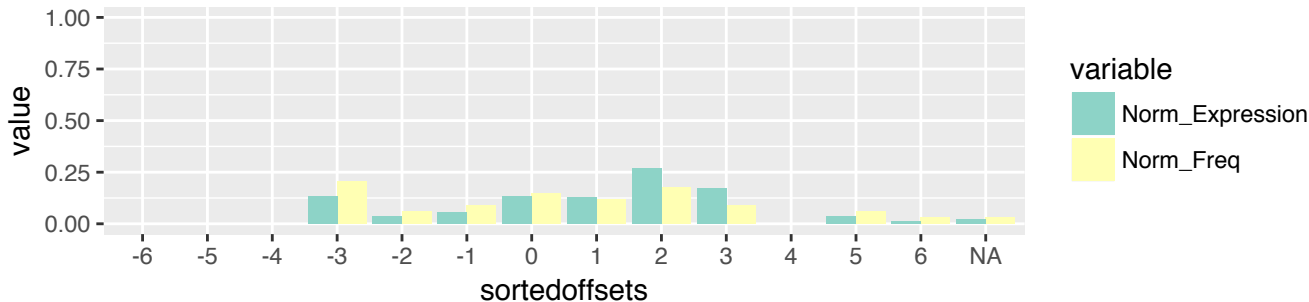

ACC (n=1068)  
 i-tRF & exclusive (n=288)  
 3' terminus relative to 3' stem of A-loop (n=34)

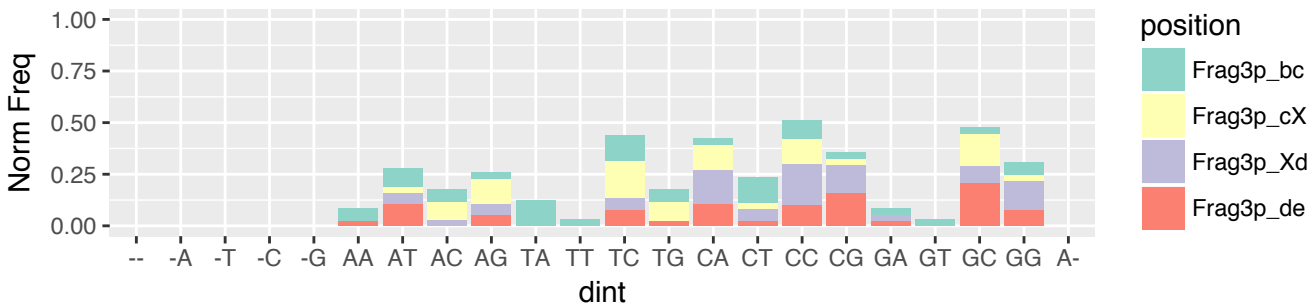

ACC (n=1068)  
 i-tRF & exclusive (n=288)  
 3' terminus relative to 3' stem of A-loop (n=34)

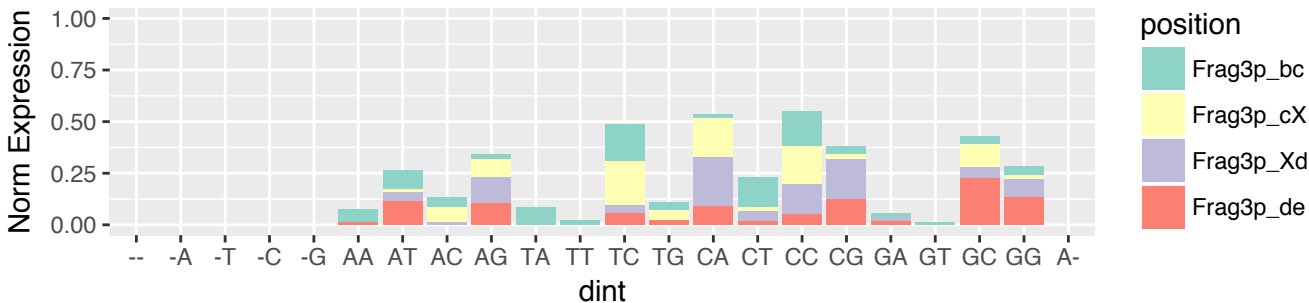

ACC (n=1068)  
 i-tRF & exclusive (n=288)  
 3' terminus relative to 5' stem of T-loop (n=61)

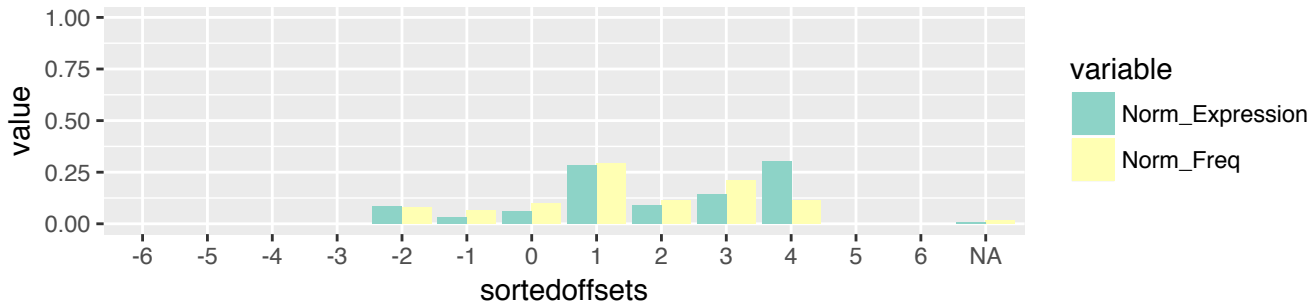

ACC (n=1068)  
 i-tRF & exclusive (n=288)  
 3' terminus relative to 5' stem of T-loop (n=61)

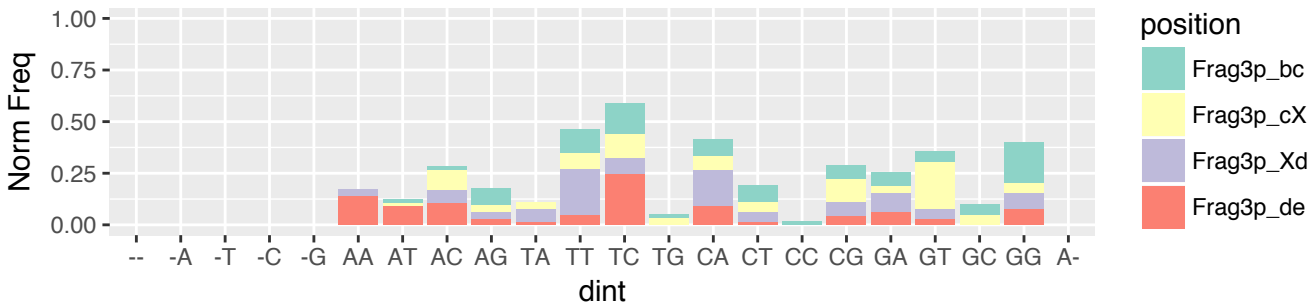

ACC (n=1068)  
 i-tRF & exclusive (n=288)  
 3' terminus relative to 5' stem of T-loop (n=61)

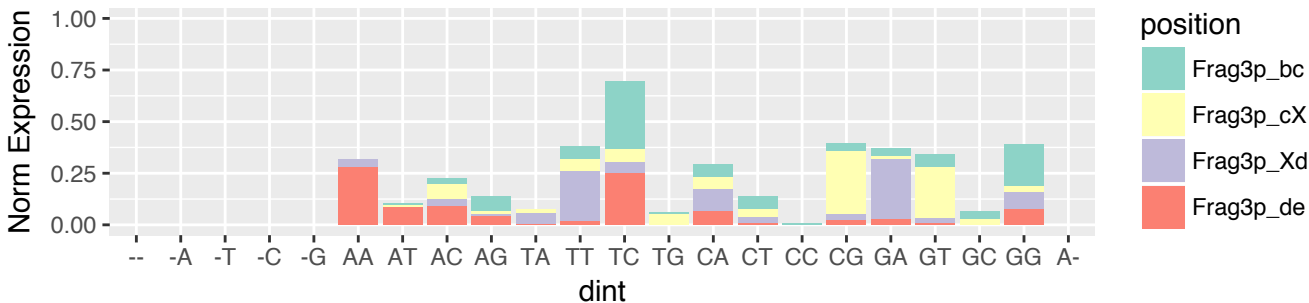

ACC (n=1068)  
i-tRF & exclusive (n=288)  
3' terminus relative to 3' stem of T-loop (n=92)

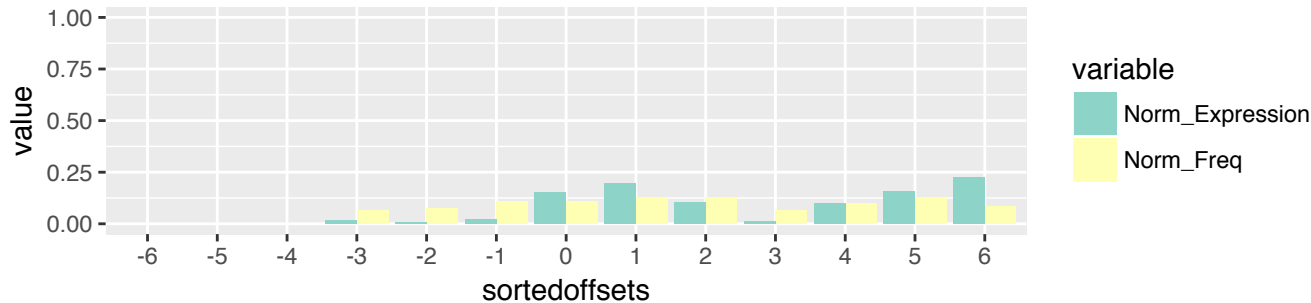

ACC (n=1068)  
i-tRF & exclusive (n=288)  
3' terminus relative to 3' stem of T-loop (n=92)

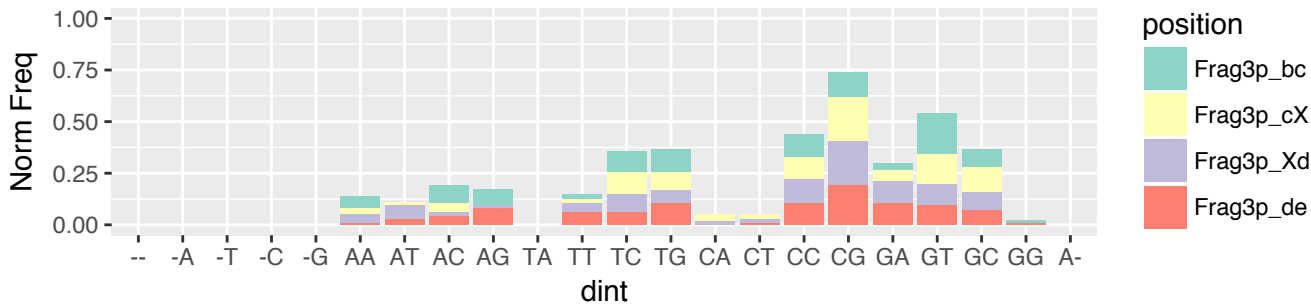

ACC (n=1068)  
i-tRF & exclusive (n=288)  
3' terminus relative to 3' stem of T-loop (n=92)

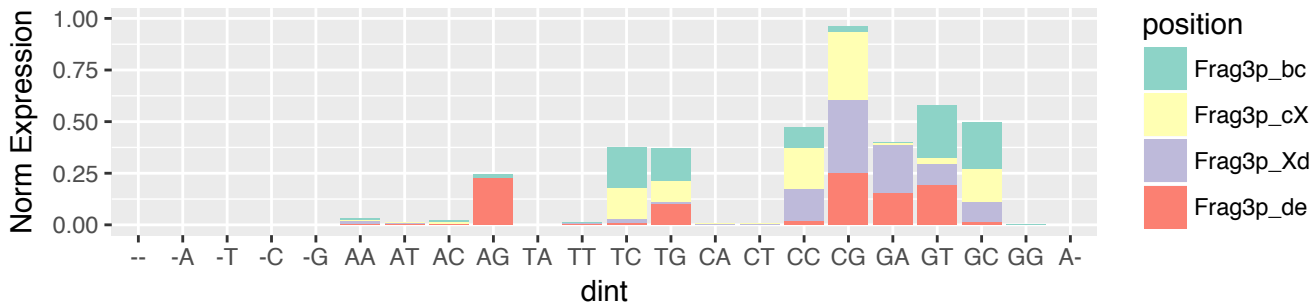

ACC (n=1068)  
 i-tRF & exclusive (n=288)  
 3' terminus relative to 3' end of the tRNA (n=45)

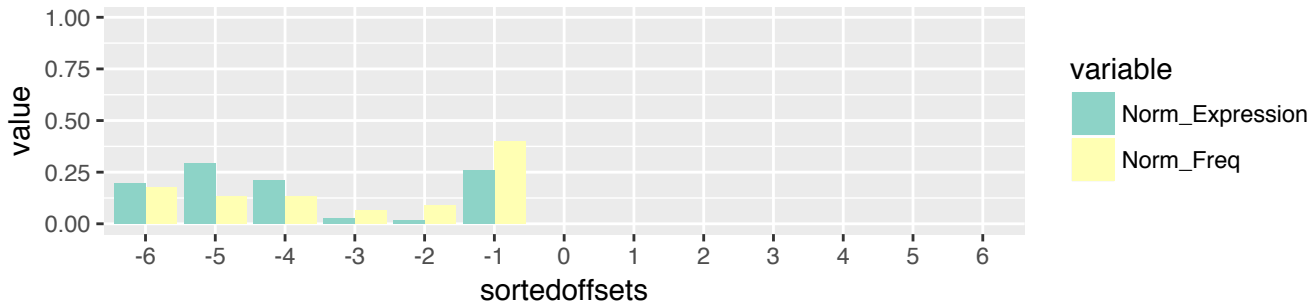

ACC (n=1068)  
 i-tRF & exclusive (n=288)  
 3' terminus relative to 3' end of the tRNA (n=45)

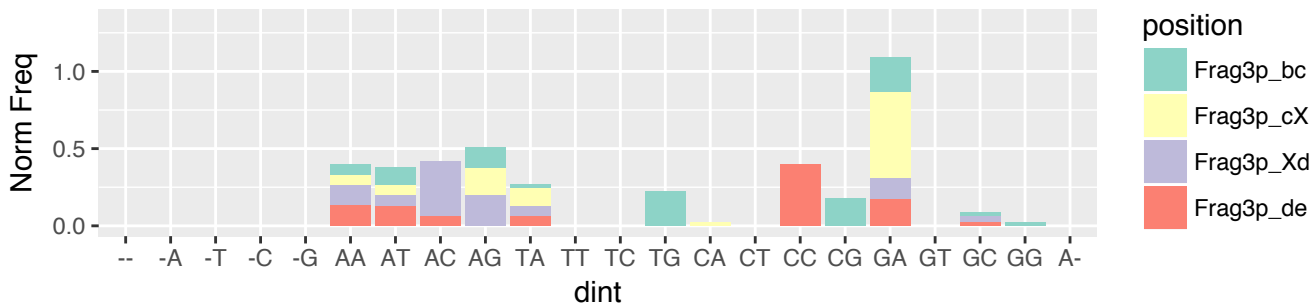

ACC (n=1068)  
 i-tRF & exclusive (n=288)  
 3' terminus relative to 3' end of the tRNA (n=45)

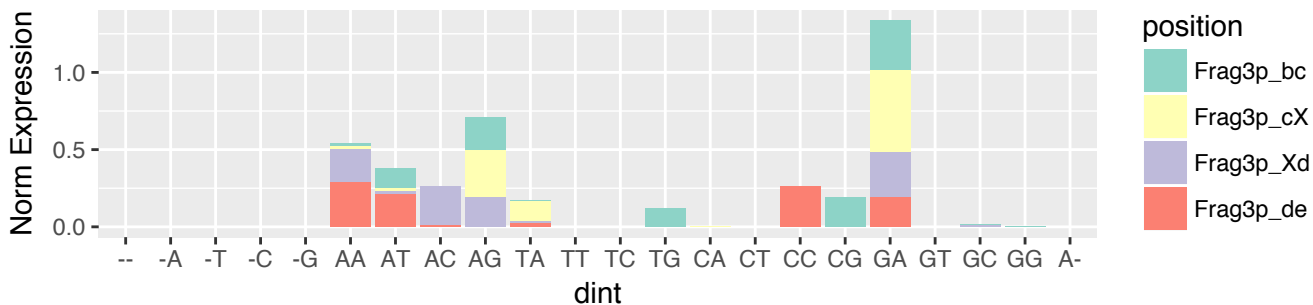

ACC (n=1068)  
 3'-tRF & exclusive (n=191)  
 5' terminus relative to 3' stem of A-loop (n=2)



ACC (n=1068)  
 3'-tRF & exclusive (n=191)  
 5' terminus relative to 3' stem of A-loop (n=2)

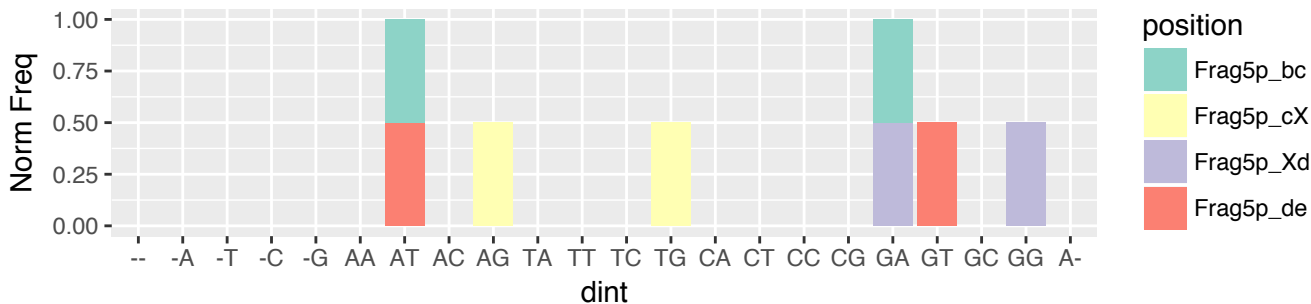

ACC (n=1068)  
 3'-tRF & exclusive (n=191)  
 5' terminus relative to 3' stem of A-loop (n=2)

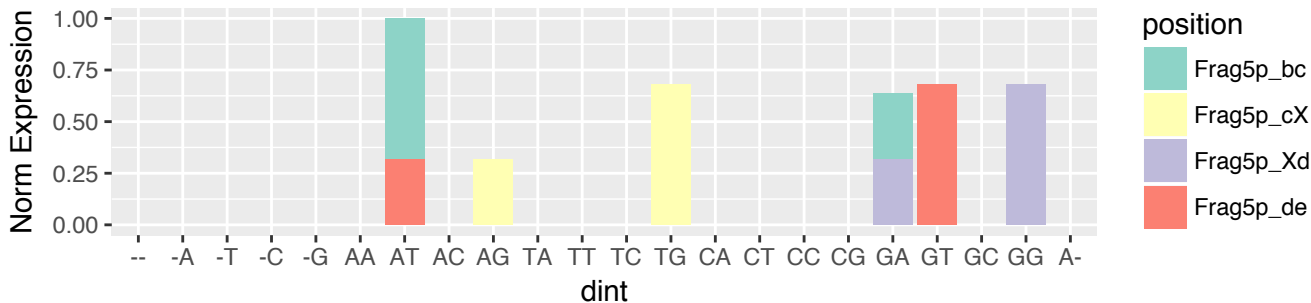

ACC (n=1068)  
 3'-tRF & exclusive (n=191)  
 5' terminus relative to 5' stem of T-loop (n=160)

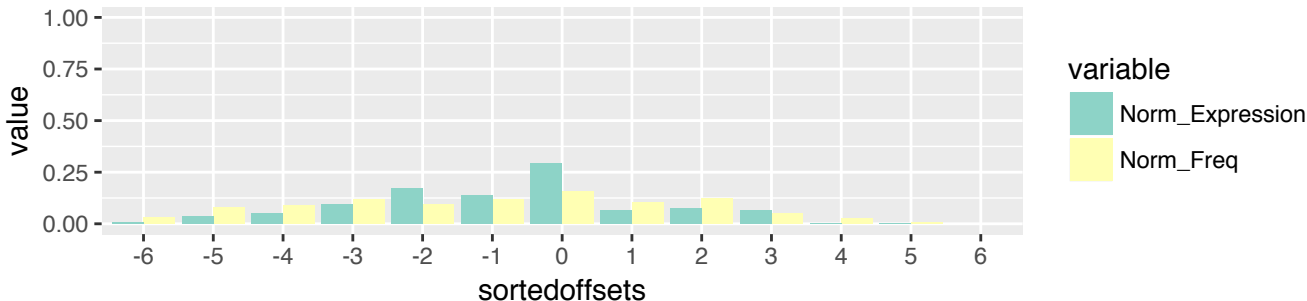

ACC (n=1068)  
 3'-tRF & exclusive (n=191)  
 5' terminus relative to 5' stem of T-loop (n=160)

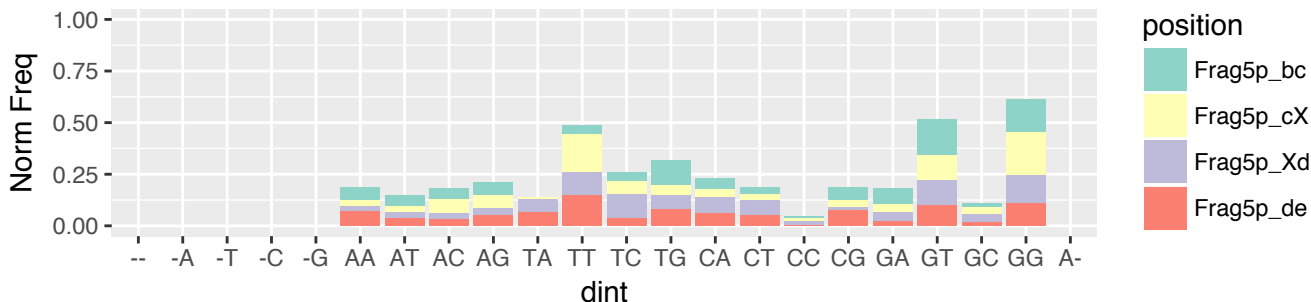

ACC (n=1068)  
 3'-tRF & exclusive (n=191)  
 5' terminus relative to 5' stem of T-loop (n=160)

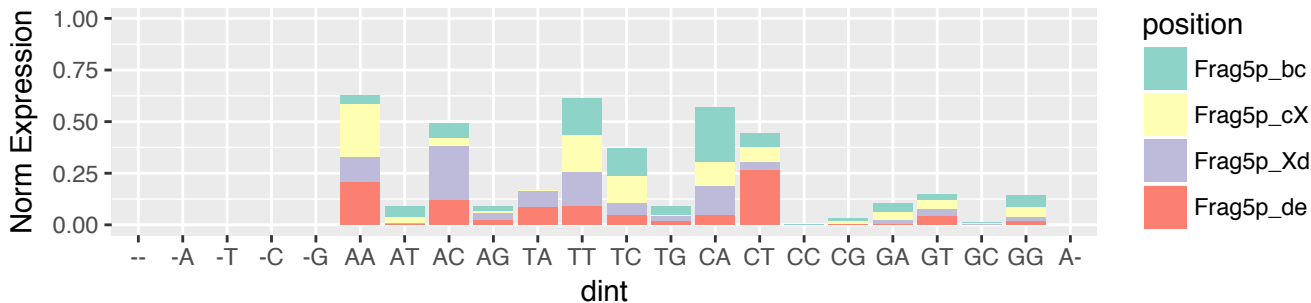

ACC (n=1068)  
 3'-tRF & exclusive (n=191)  
 5' terminus relative to 3' stem of T-loop (n=29)

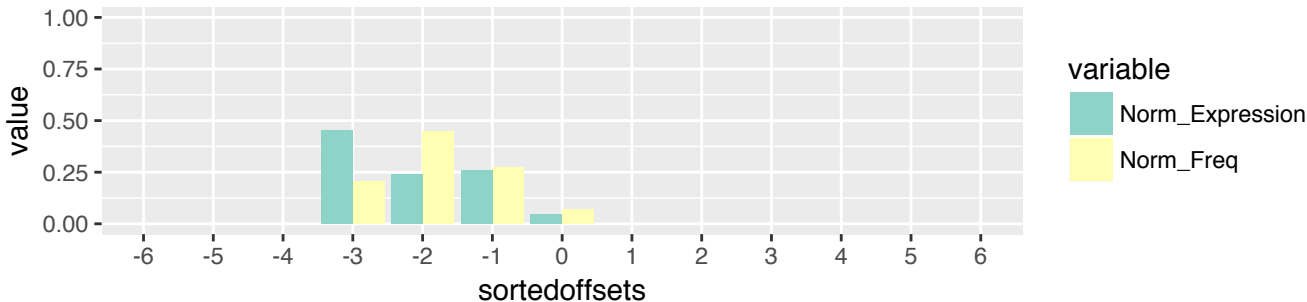

ACC (n=1068)  
 3'-tRF & exclusive (n=191)  
 5' terminus relative to 3' stem of T-loop (n=29)

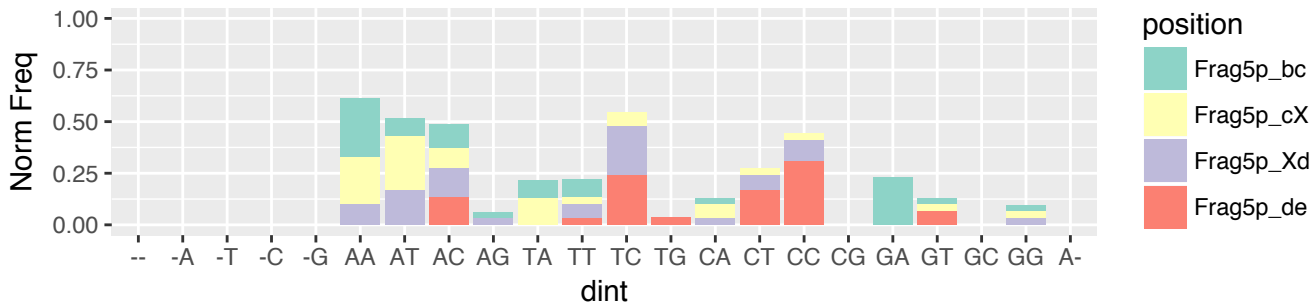

ACC (n=1068)  
 3'-tRF & exclusive (n=191)  
 5' terminus relative to 3' stem of T-loop (n=29)

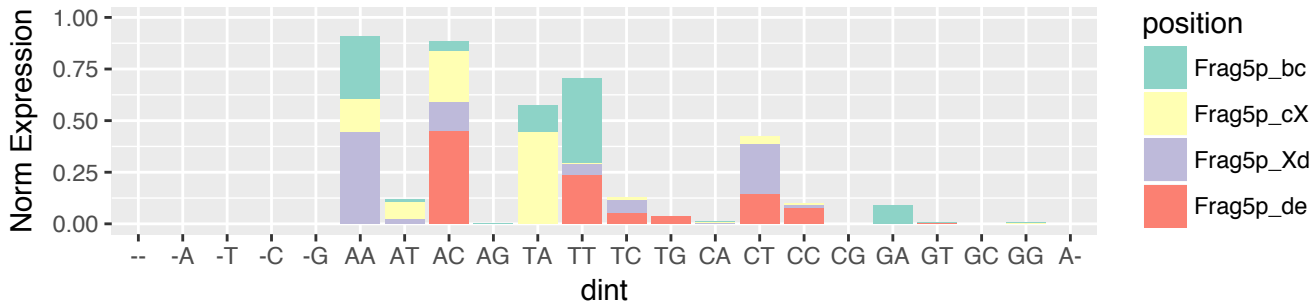

ACC (n=1068)  
 3'-tRF & exclusive (n=191)  
 3' terminus relative to 3' end of the tRNA (n=191)

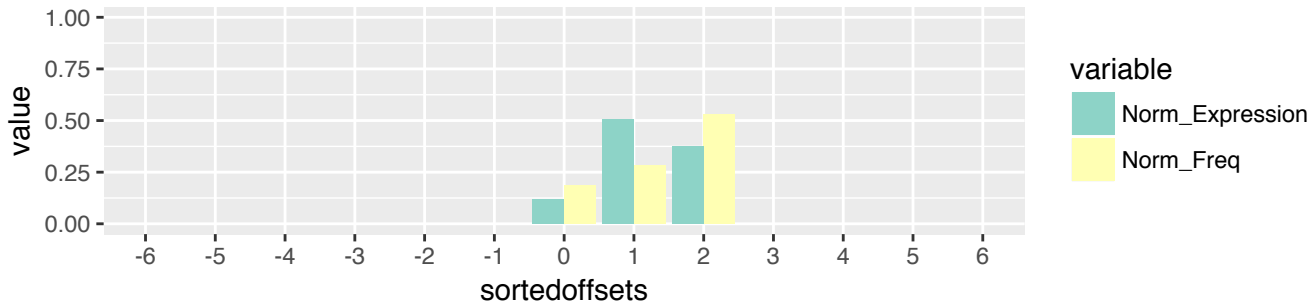

ACC (n=1068)  
 3'-tRF & exclusive (n=191)  
 3' terminus relative to 3' end of the tRNA (n=191)

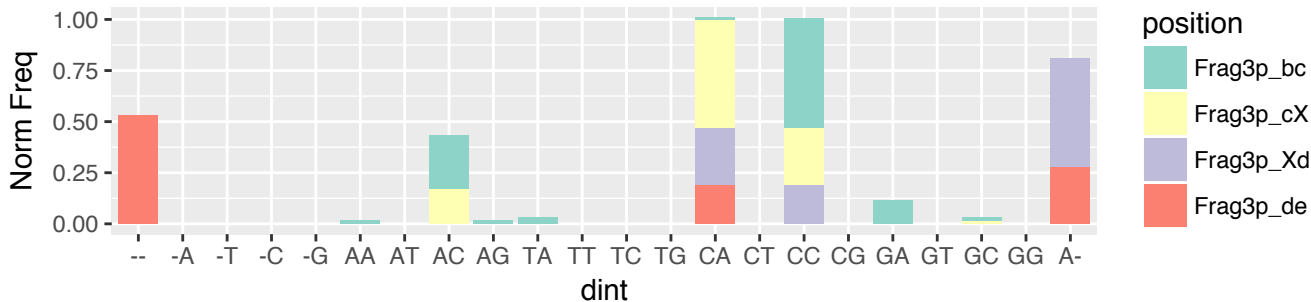

ACC (n=1068)  
 3'-tRF & exclusive (n=191)  
 3' terminus relative to 3' end of the tRNA (n=191)

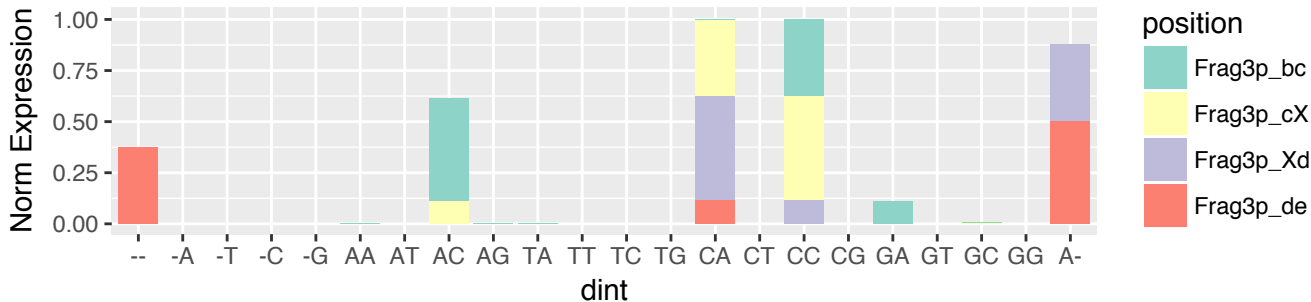



BLCA (n=832)  
 5'-half & exclusive (n=4)  
 5' terminus relative to 5' end of the tRNA (n=4)

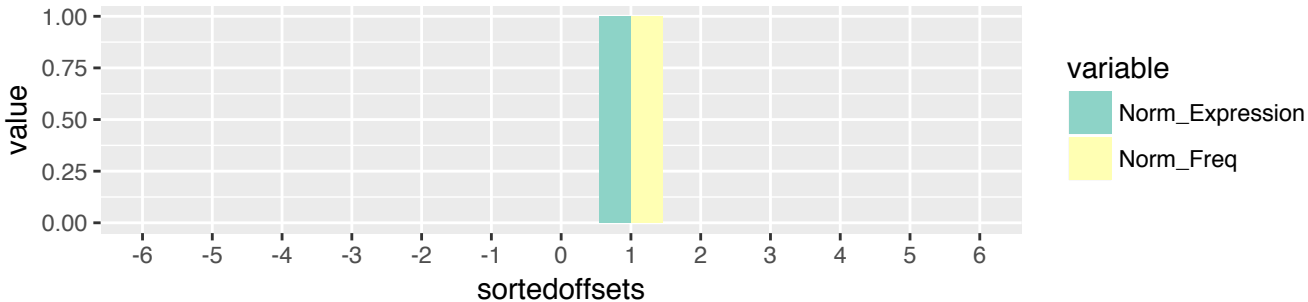

BLCA (n=832)  
 5'-half & exclusive (n=4)  
 5' terminus relative to 5' end of the tRNA (n=4)

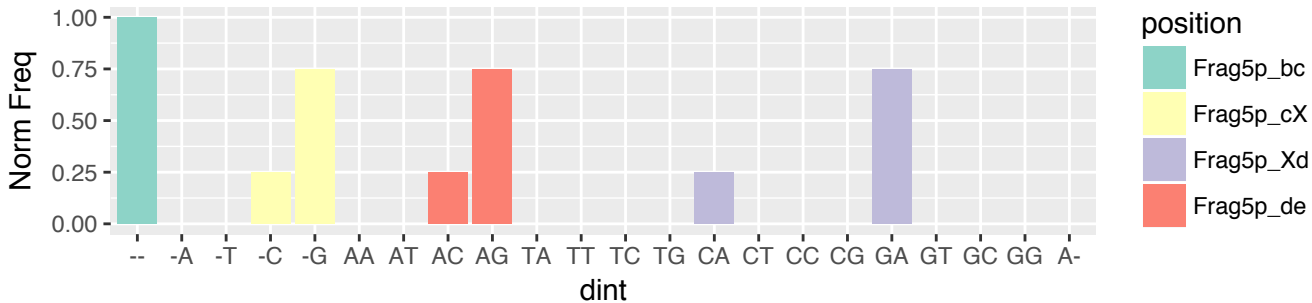

BLCA (n=832)  
 5'-half & exclusive (n=4)  
 5' terminus relative to 5' end of the tRNA (n=4)

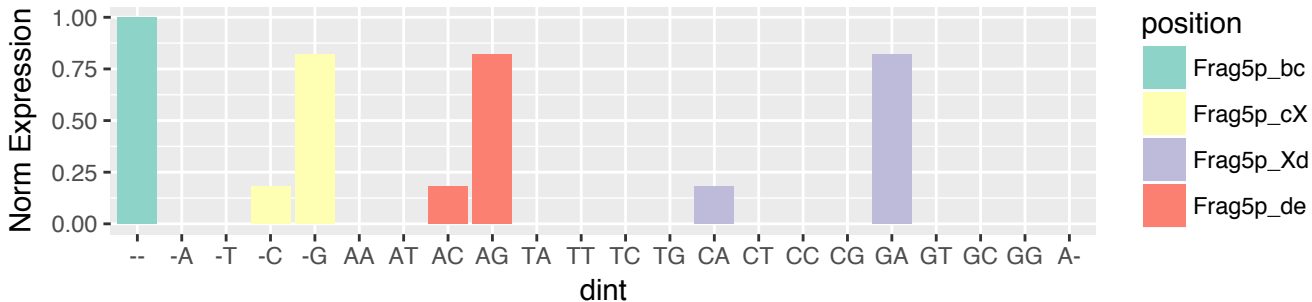

BLCA (n=832)  
 5'-half & exclusive (n=4)  
 3' terminus relative to 5' stem of A-loop (n=4)

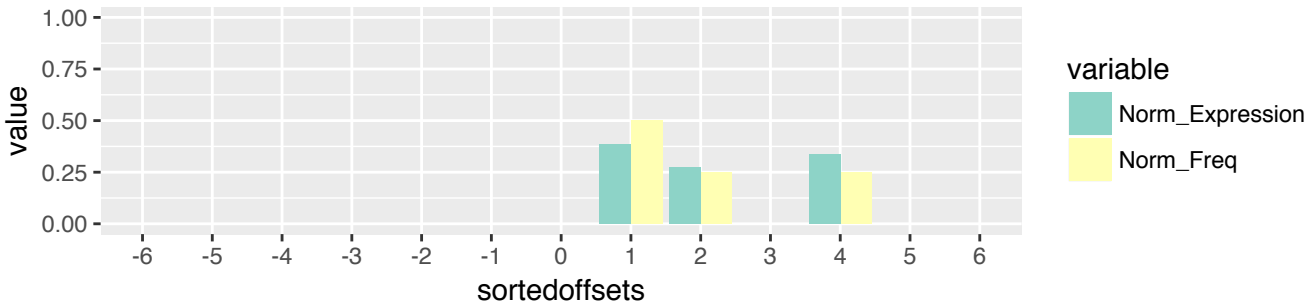

BLCA (n=832)  
 5'-half & exclusive (n=4)  
 3' terminus relative to 5' stem of A-loop (n=4)

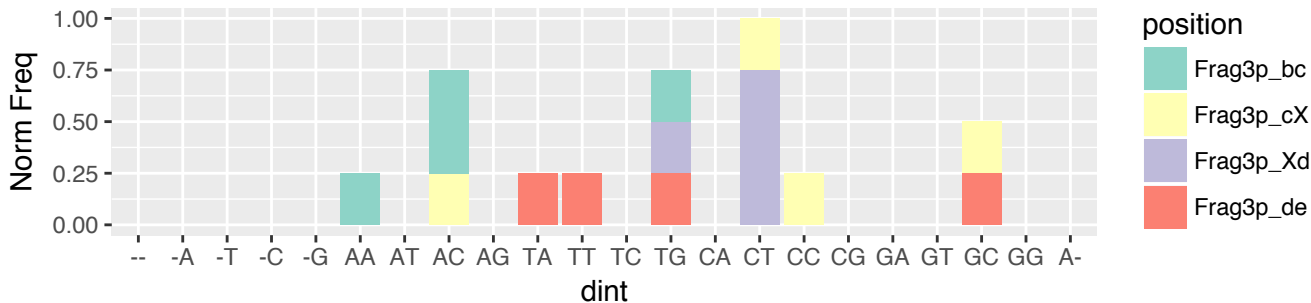

BLCA (n=832)  
 5'-half & exclusive (n=4)  
 3' terminus relative to 5' stem of A-loop (n=4)

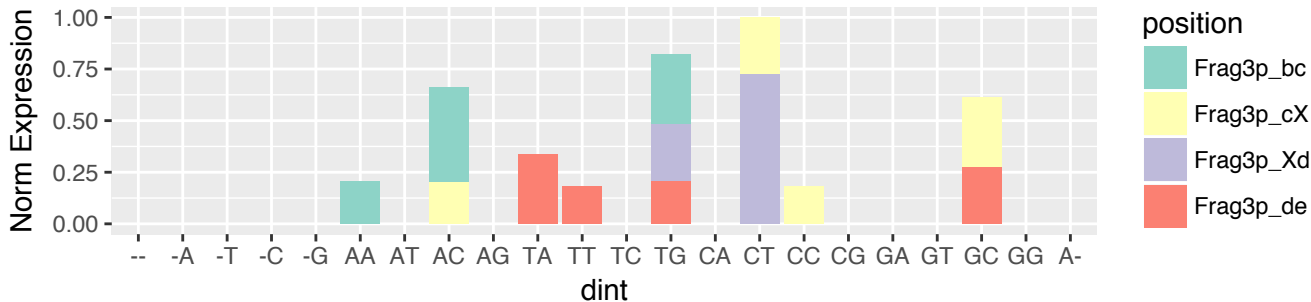

BLCA (n=832)  
 5'-tRF & exclusive (n=143)  
 5' terminus relative to 5' end of the tRNA (n=143)

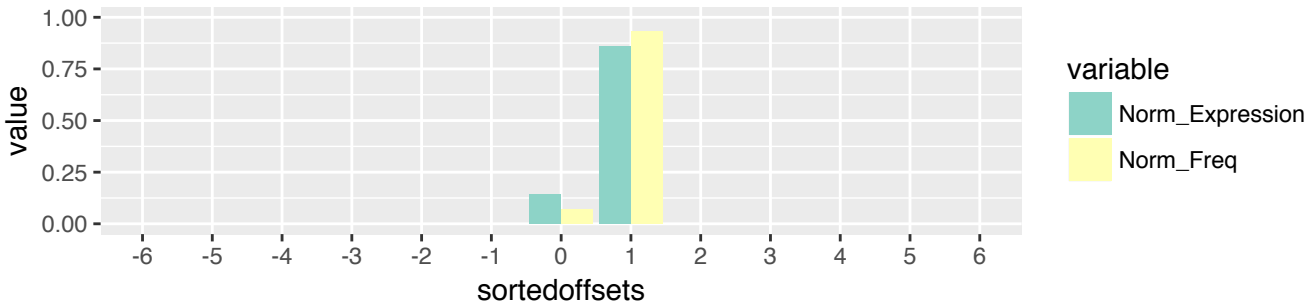

BLCA (n=832)  
 5'-tRF & exclusive (n=143)  
 5' terminus relative to 5' end of the tRNA (n=143)

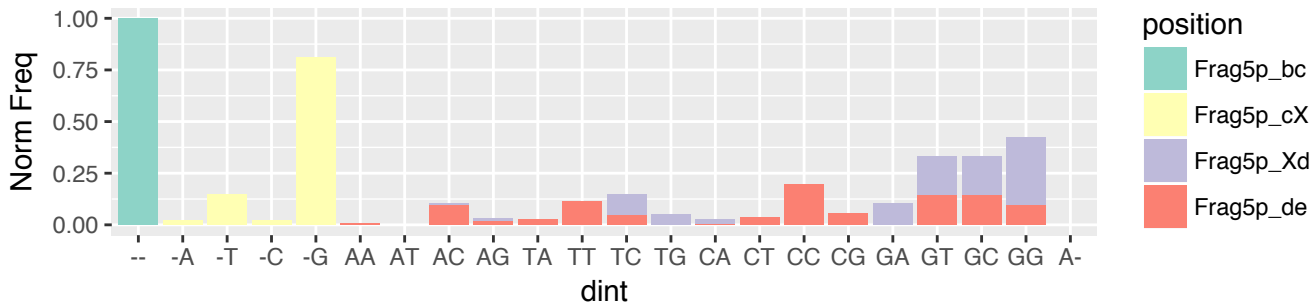

BLCA (n=832)  
 5'-tRF & exclusive (n=143)  
 5' terminus relative to 5' end of the tRNA (n=143)

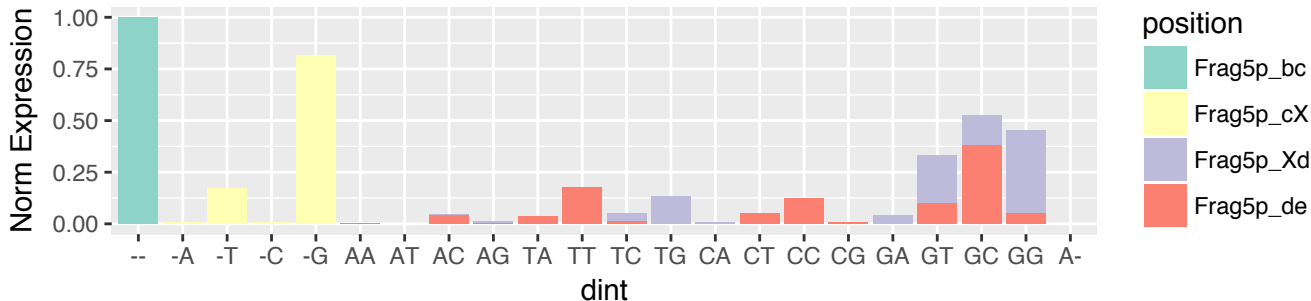

BLCA (n=832)  
 5'-tRF & exclusive (n=143)  
 3' terminus relative to 5' stem of D-loop (n=5)

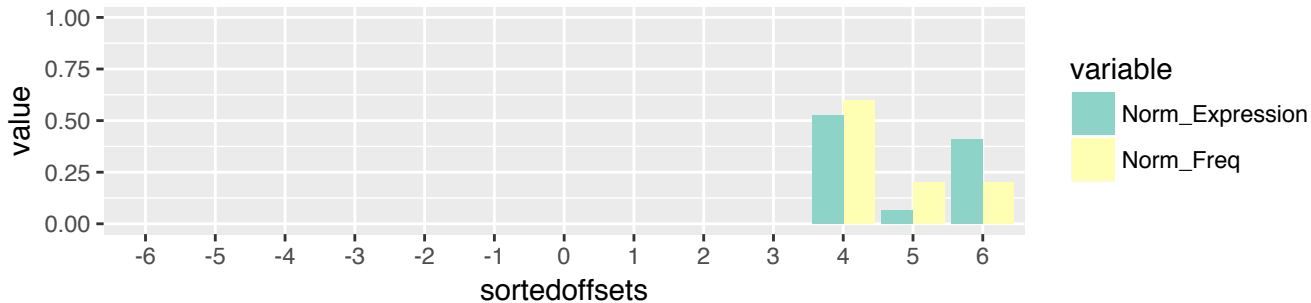

BLCA (n=832)  
 5'-tRF & exclusive (n=143)  
 3' terminus relative to 5' stem of D-loop (n=5)

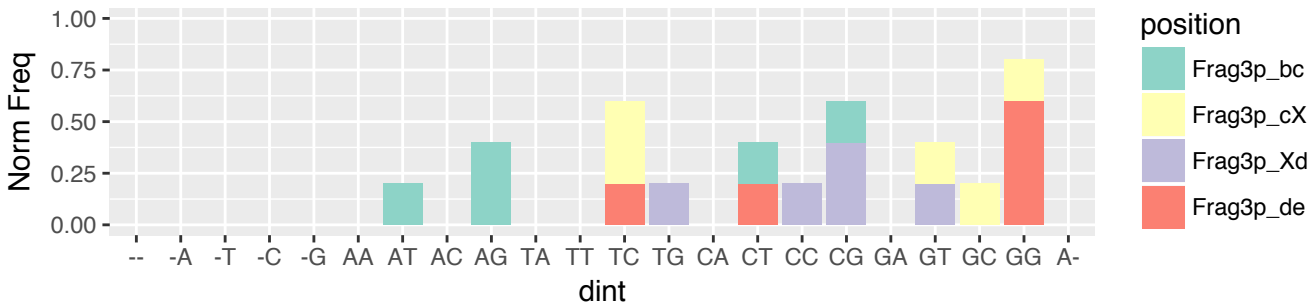

BLCA (n=832)  
 5'-tRF & exclusive (n=143)  
 3' terminus relative to 5' stem of D-loop (n=5)

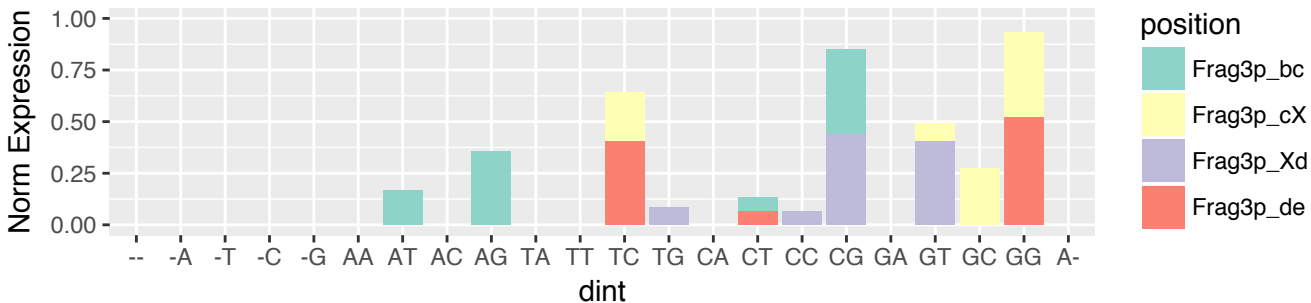

BLCA (n=832)  
 5'-tRF & exclusive (n=143)  
 3' terminus relative to 3' stem of D-loop (n=130)

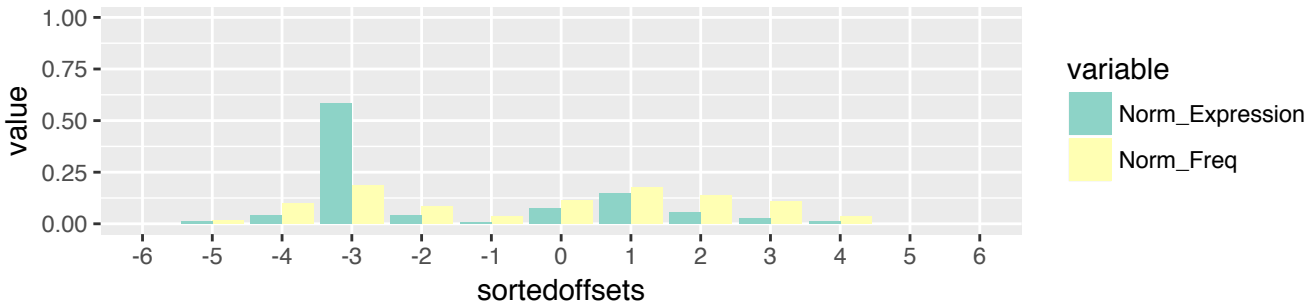

BLCA (n=832)  
 5'-tRF & exclusive (n=143)  
 3' terminus relative to 3' stem of D-loop (n=130)

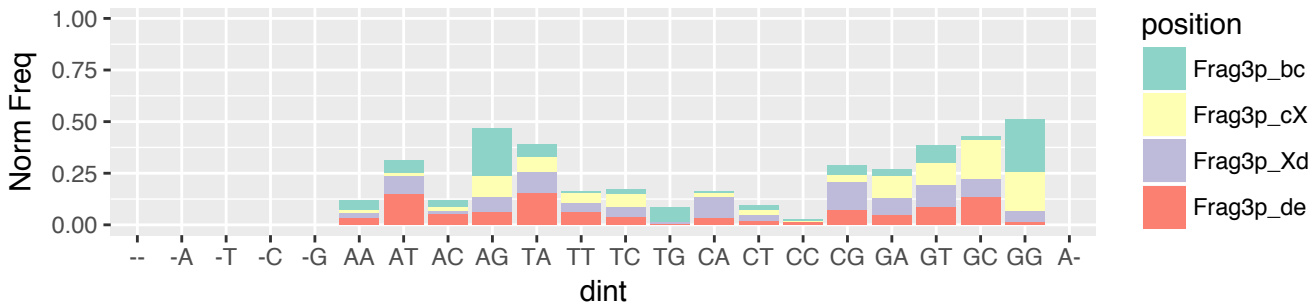

BLCA (n=832)  
 5'-tRF & exclusive (n=143)  
 3' terminus relative to 3' stem of D-loop (n=130)

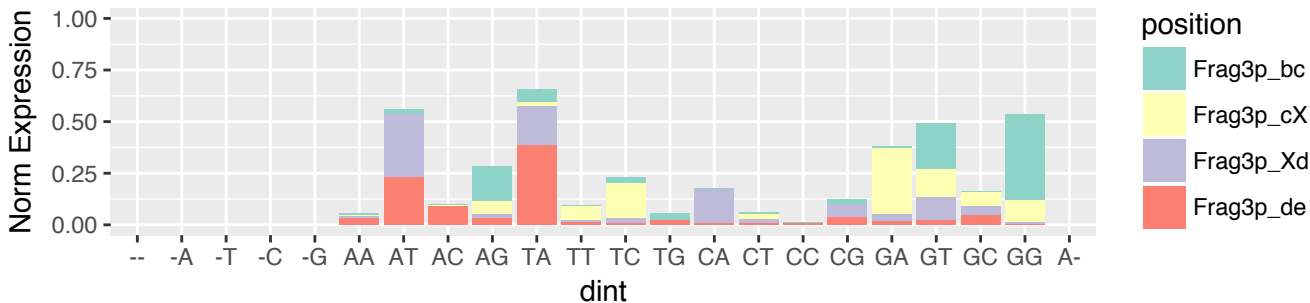

BLCA (n=832)  
 5'-tRF & exclusive (n=143)  
 3' terminus relative to 5' stem of A-loop (n=5)

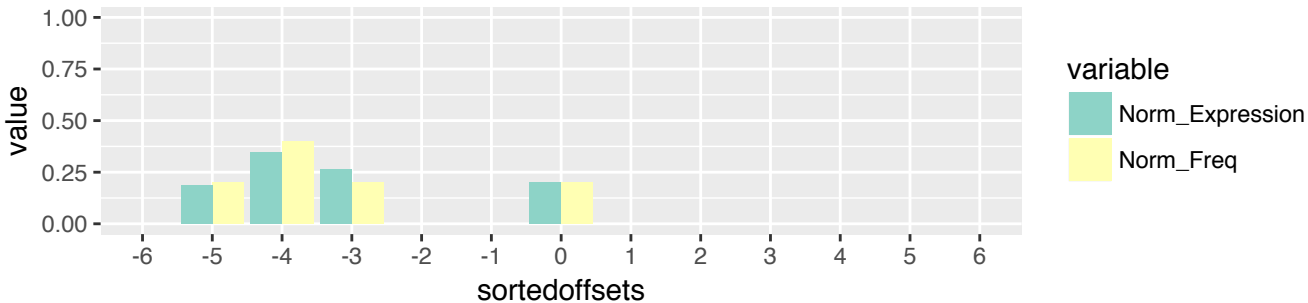

BLCA (n=832)  
 5'-tRF & exclusive (n=143)  
 3' terminus relative to 5' stem of A-loop (n=5)

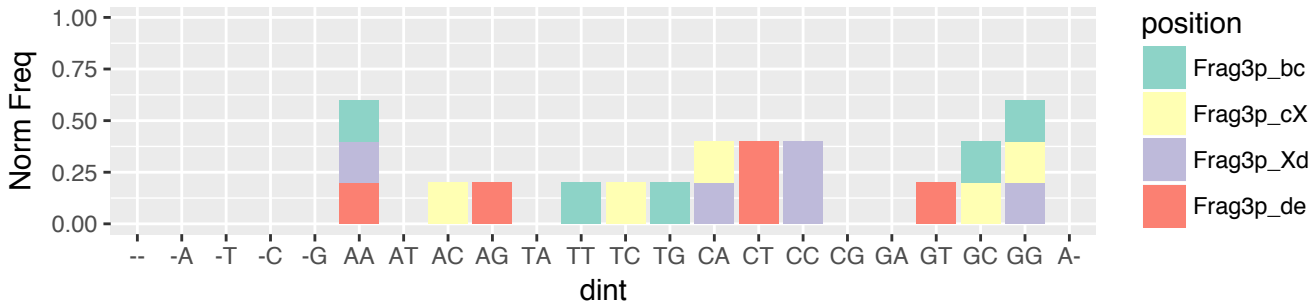

BLCA (n=832)  
 5'-tRF & exclusive (n=143)  
 3' terminus relative to 5' stem of A-loop (n=5)

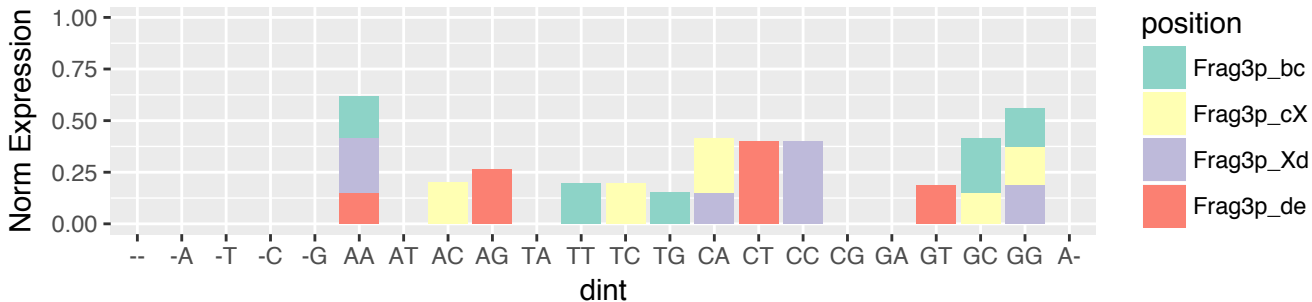

BLCA (n=832)  
 5'-tRF & exclusive (n=143)  
 3' terminus relative to 3' stem of A-loop (n=3)

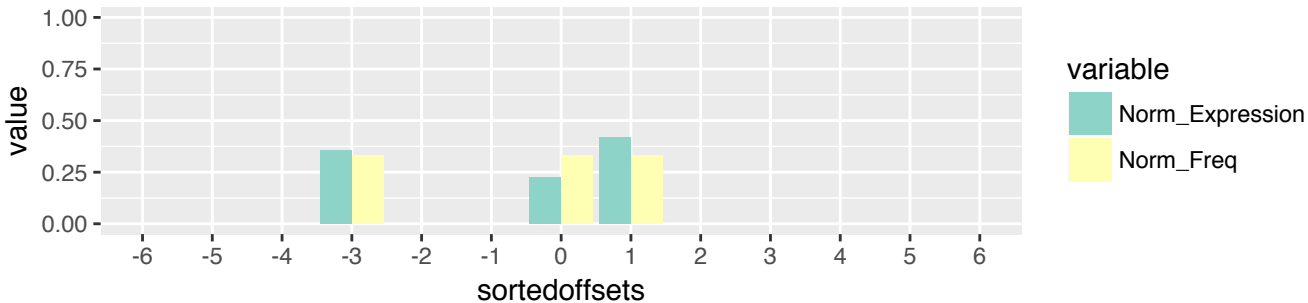

BLCA (n=832)  
 5'-tRF & exclusive (n=143)  
 3' terminus relative to 3' stem of A-loop (n=3)

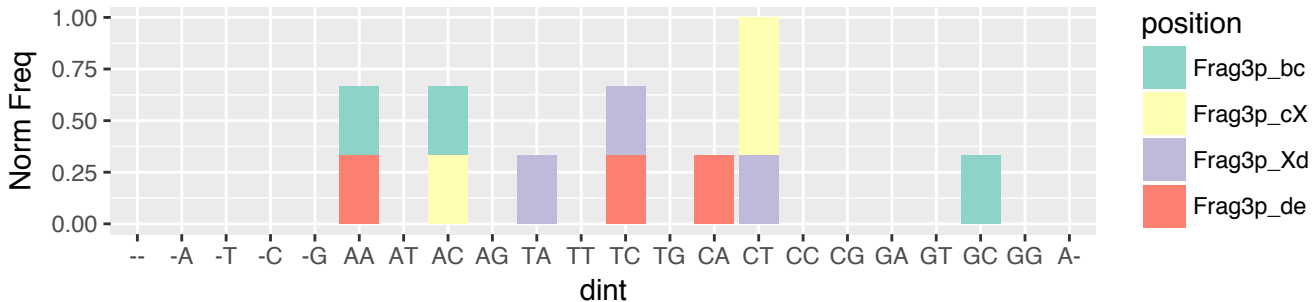

BLCA (n=832)  
 5'-tRF & exclusive (n=143)  
 3' terminus relative to 3' stem of A-loop (n=3)

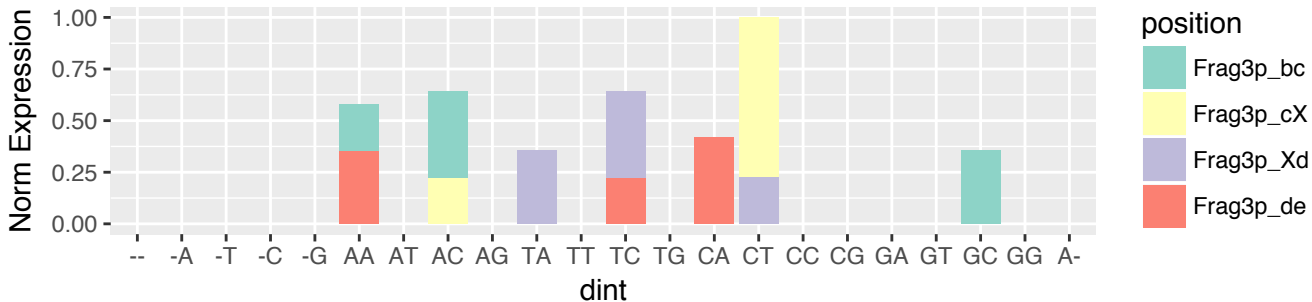

BLCA (n=832)  
i-tRF & exclusive (n=162)  
5' terminus relative to 5' end of the tRNA (n=1)

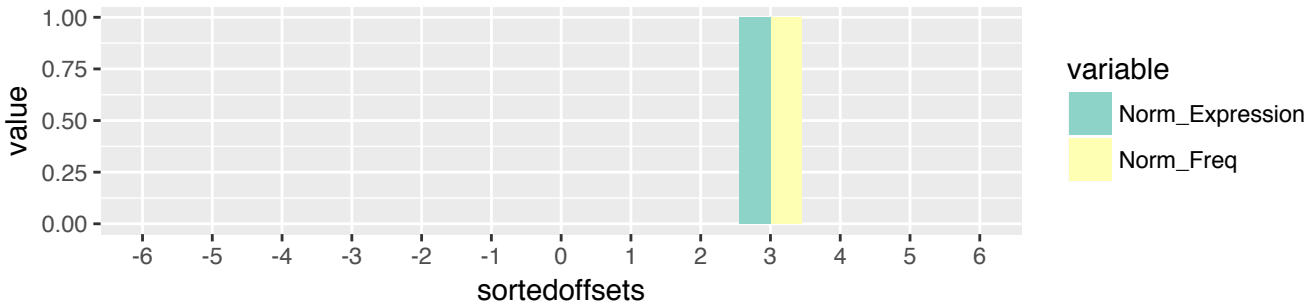

BLCA (n=832)  
i-tRF & exclusive (n=162)  
5' terminus relative to 5' end of the tRNA (n=1)

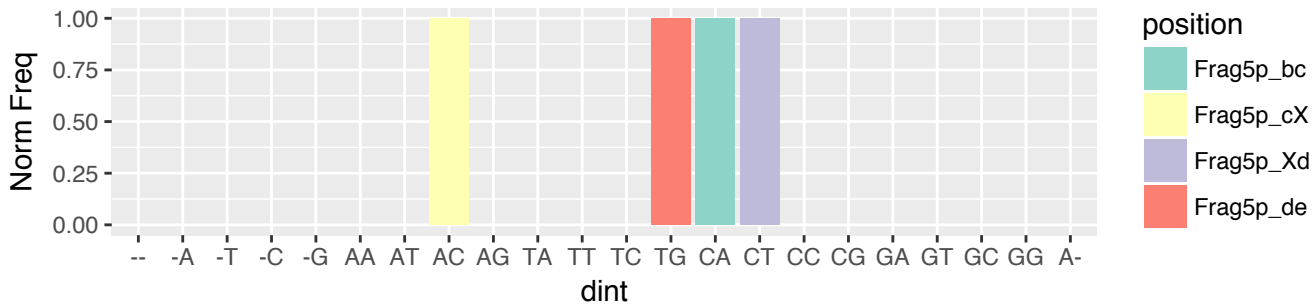

BLCA (n=832)  
i-tRF & exclusive (n=162)  
5' terminus relative to 5' end of the tRNA (n=1)

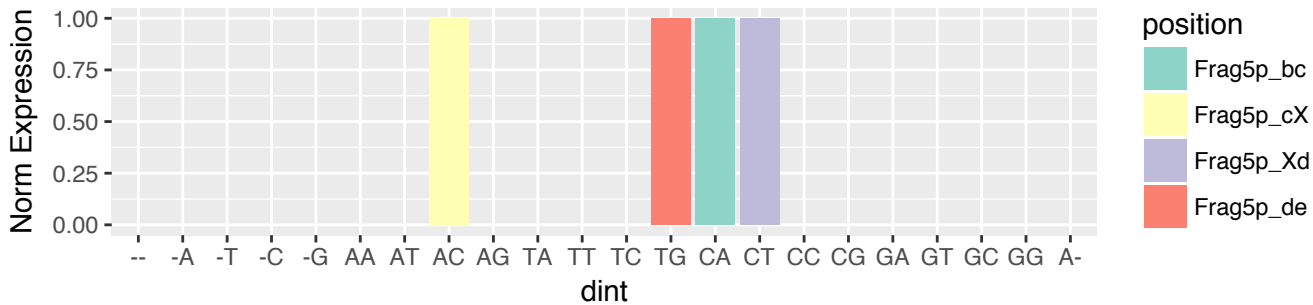



BLCA (n=832)  
 i-tRF & exclusive (n=162)  
 5' terminus relative to 5' stem of D-loop (n=60)

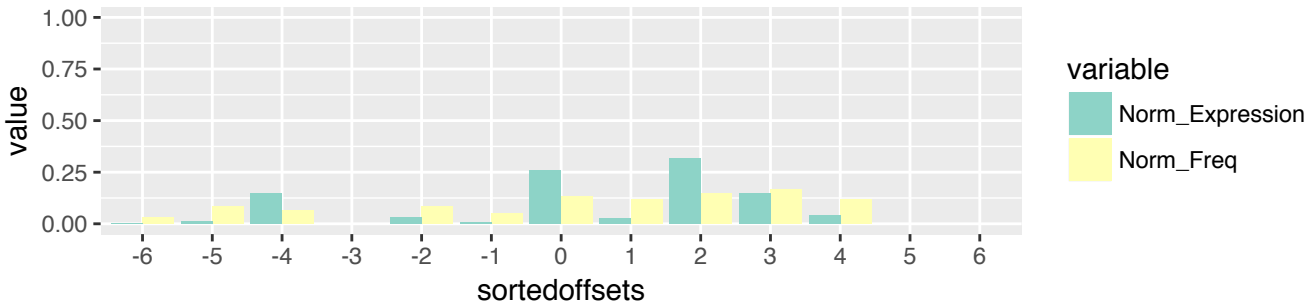

BLCA (n=832)  
 i-tRF & exclusive (n=162)  
 5' terminus relative to 5' stem of D-loop (n=60)

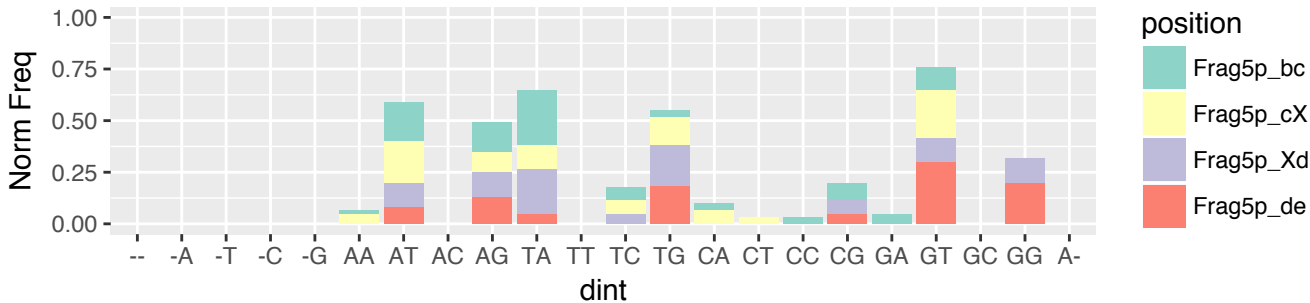

BLCA (n=832)  
 i-tRF & exclusive (n=162)  
 5' terminus relative to 5' stem of D-loop (n=60)

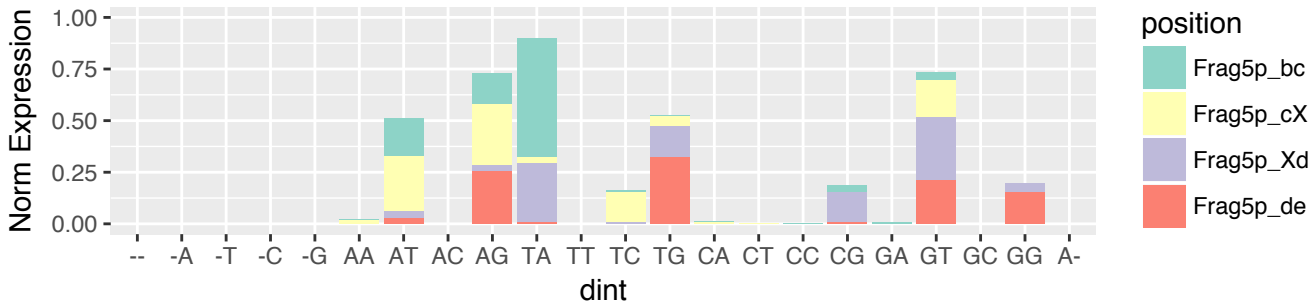

BLCA (n=832)  
 i-tRF & exclusive (n=162)  
 5' terminus relative to 3' stem of D-loop (n=8)

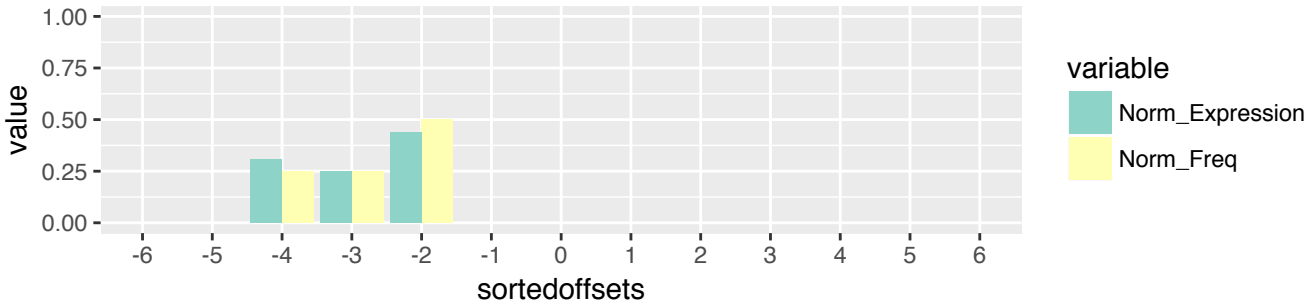

BLCA (n=832)  
 i-tRF & exclusive (n=162)  
 5' terminus relative to 3' stem of D-loop (n=8)

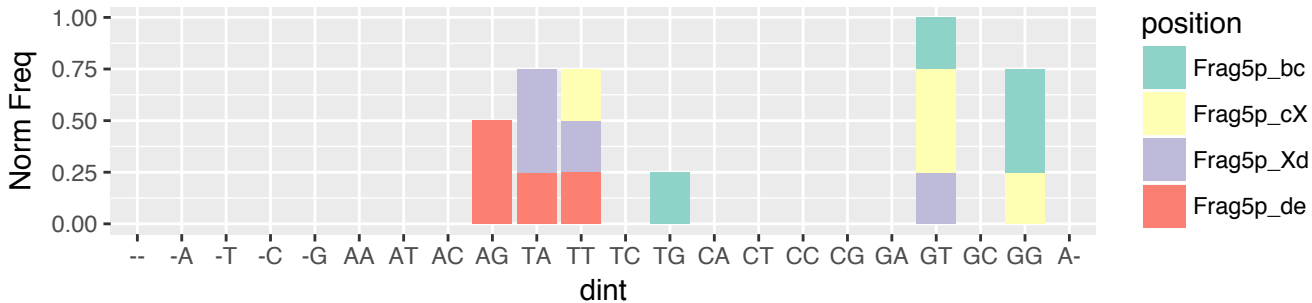

BLCA (n=832)  
 i-tRF & exclusive (n=162)  
 5' terminus relative to 3' stem of D-loop (n=8)

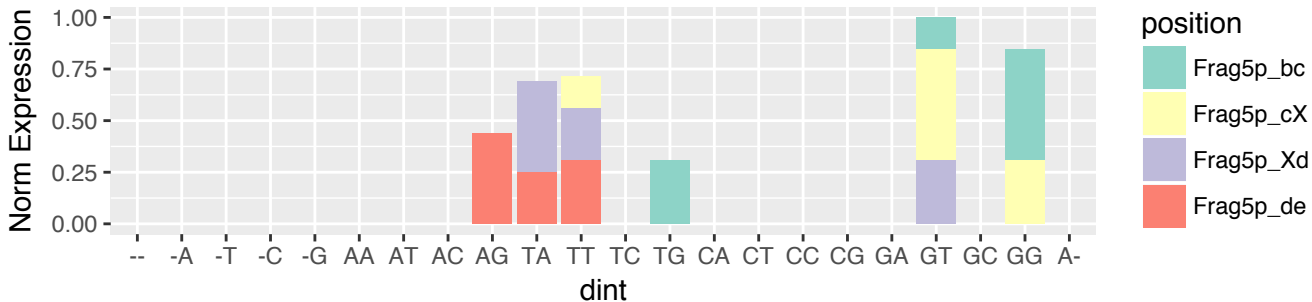

BLCA (n=832)  
 i-tRF & exclusive (n=162)  
 5' terminus relative to 5' stem of A-loop (n=26)

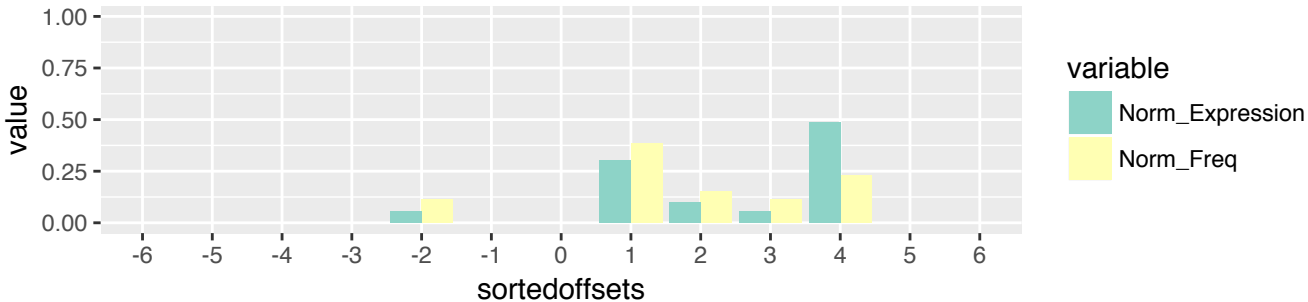

BLCA (n=832)  
 i-tRF & exclusive (n=162)  
 5' terminus relative to 5' stem of A-loop (n=26)

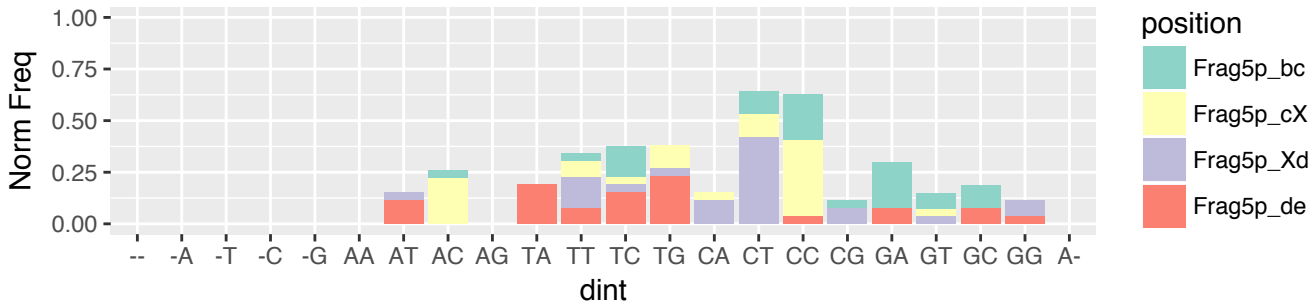

BLCA (n=832)  
 i-tRF & exclusive (n=162)  
 5' terminus relative to 5' stem of A-loop (n=26)

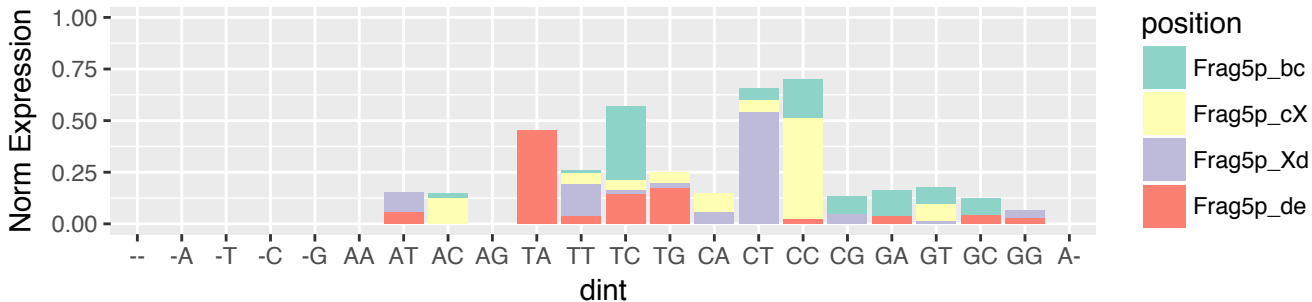

BLCA (n=832)  
 i-tRF & exclusive (n=162)  
 5' terminus relative to 3' stem of A-loop (n=54)

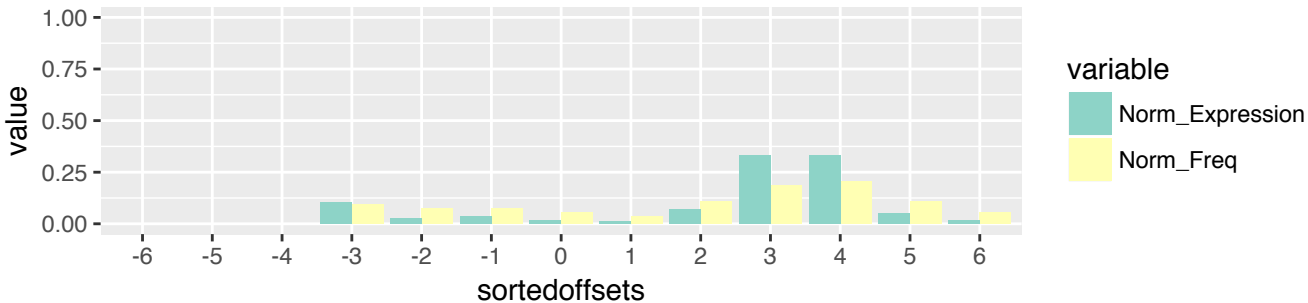

BLCA (n=832)  
 i-tRF & exclusive (n=162)  
 5' terminus relative to 3' stem of A-loop (n=54)

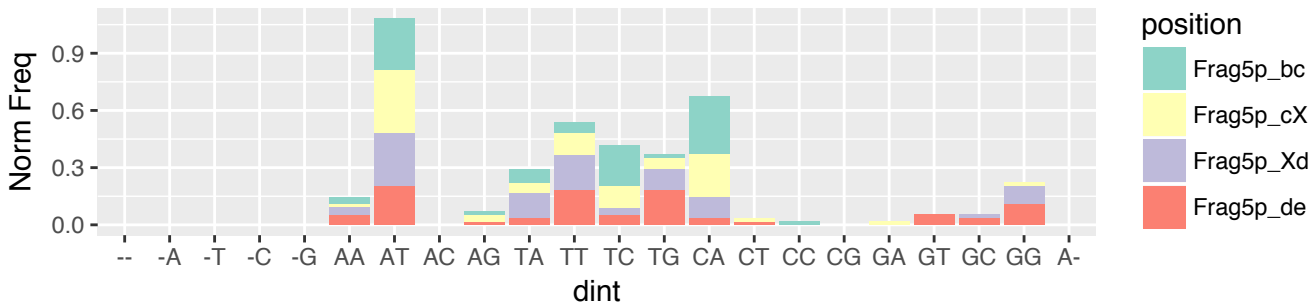

BLCA (n=832)  
 i-tRF & exclusive (n=162)  
 5' terminus relative to 3' stem of A-loop (n=54)

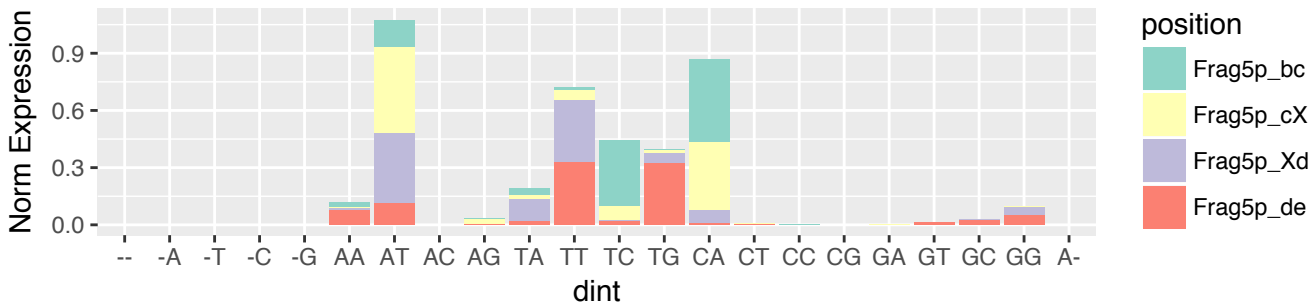

BLCA (n=832)  
 i-tRF & exclusive (n=162)  
 5' terminus relative to 5' stem of T-loop (n=13)

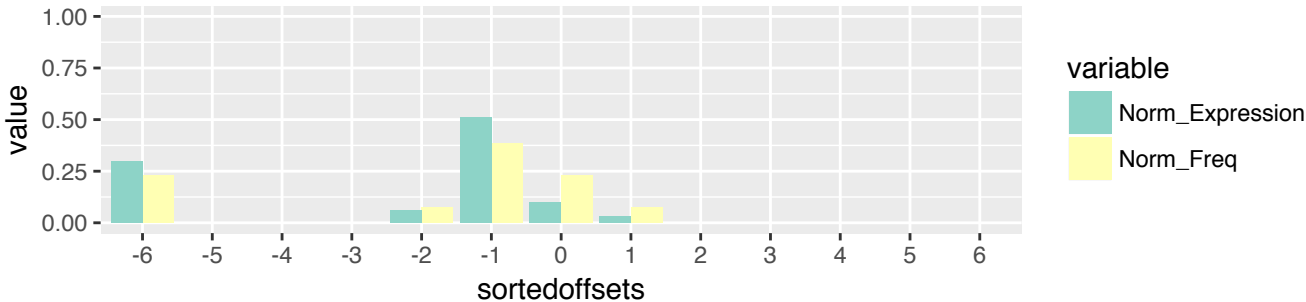

BLCA (n=832)  
 i-tRF & exclusive (n=162)  
 5' terminus relative to 5' stem of T-loop (n=13)

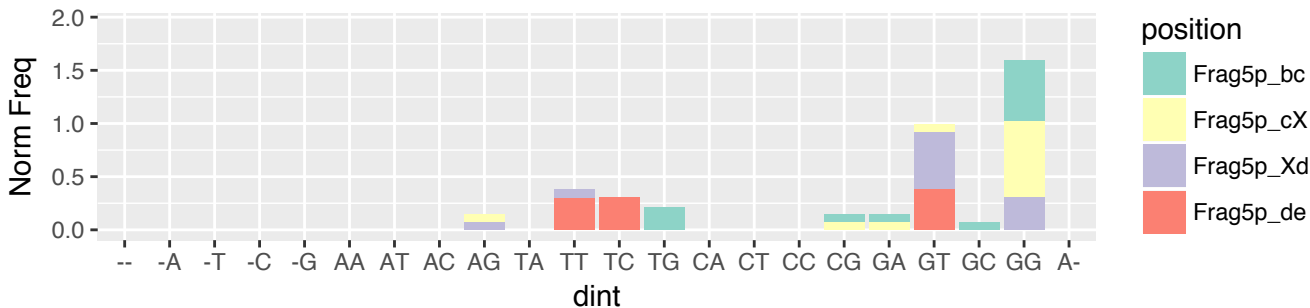

BLCA (n=832)  
 i-tRF & exclusive (n=162)  
 5' terminus relative to 5' stem of T-loop (n=13)

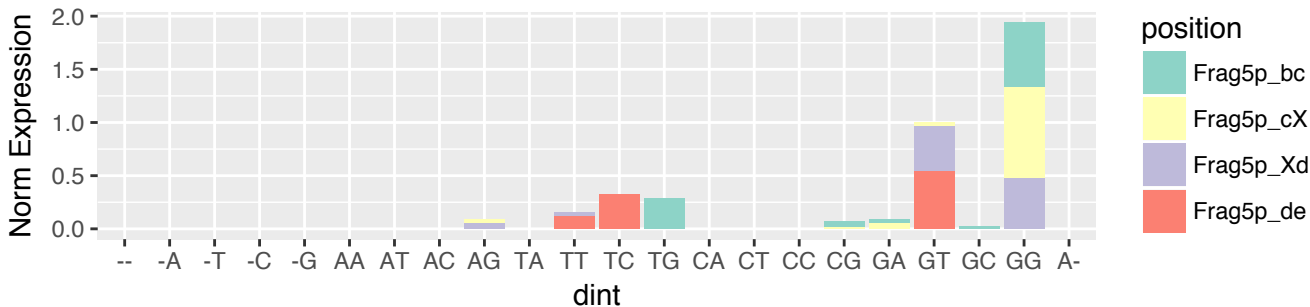

BLCA (n=832)  
 i-tRF & exclusive (n=162)  
 3' terminus relative to 5' stem of A-loop (n=48)

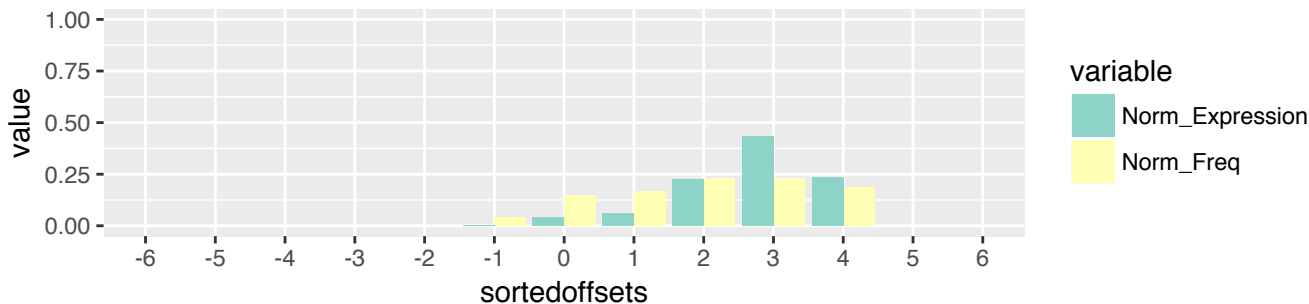

BLCA (n=832)  
 i-tRF & exclusive (n=162)  
 3' terminus relative to 5' stem of A-loop (n=48)

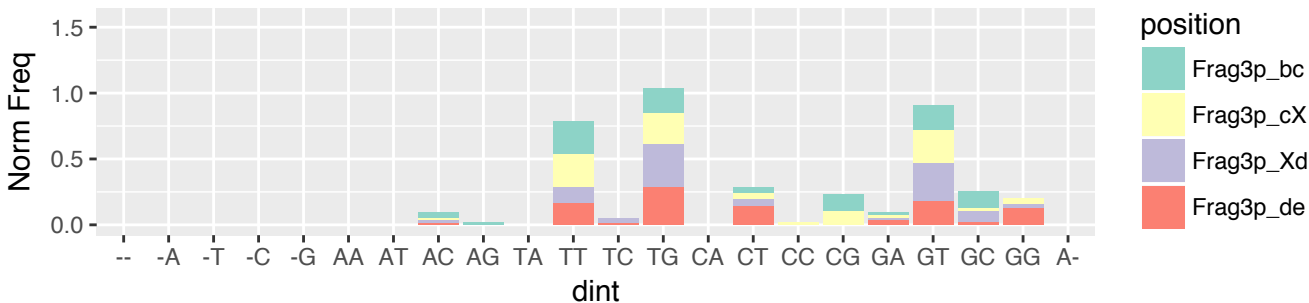

BLCA (n=832)  
 i-tRF & exclusive (n=162)  
 3' terminus relative to 5' stem of A-loop (n=48)

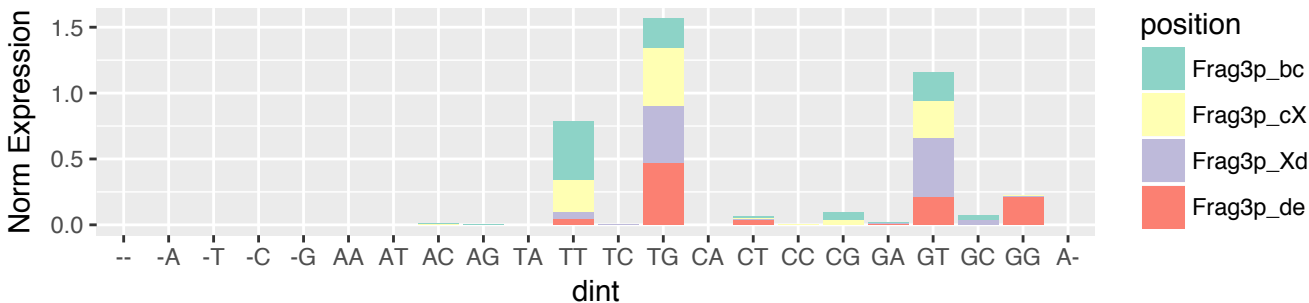

BLCA (n=832)  
 i-tRF & exclusive (n=162)  
 3' terminus relative to 3' stem of A-loop (n=23)

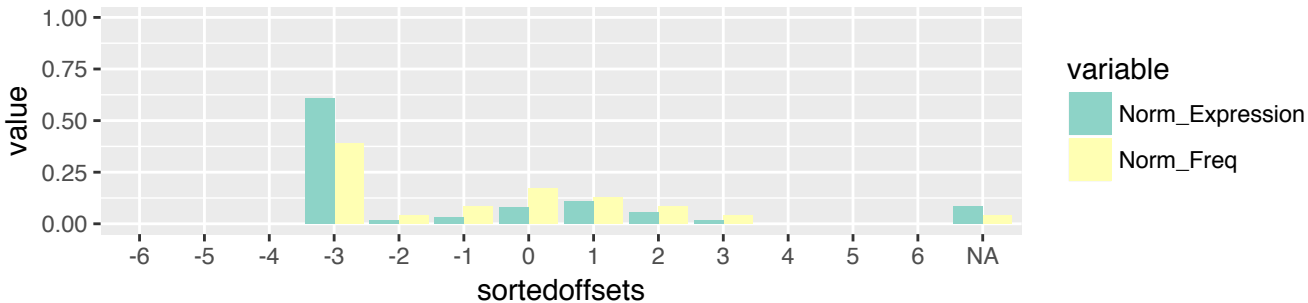

BLCA (n=832)  
 i-tRF & exclusive (n=162)  
 3' terminus relative to 3' stem of A-loop (n=23)

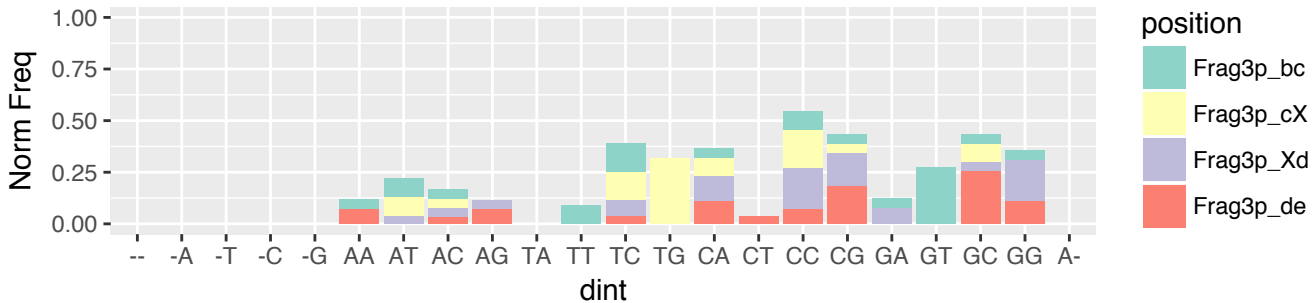

BLCA (n=832)  
 i-tRF & exclusive (n=162)  
 3' terminus relative to 3' stem of A-loop (n=23)

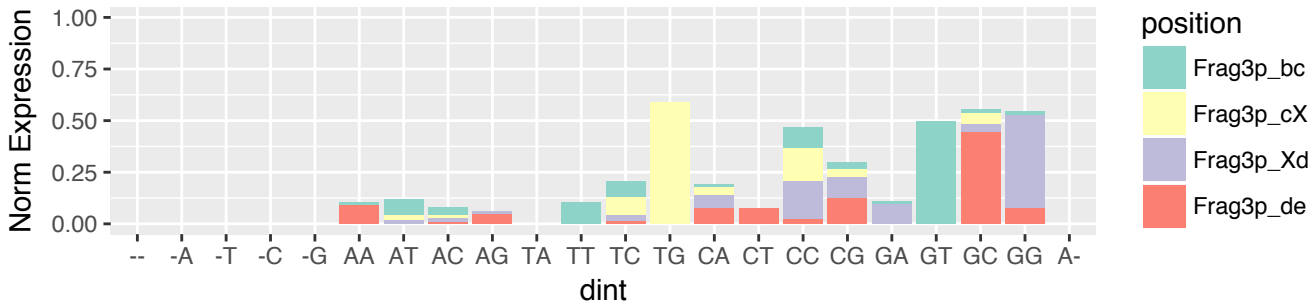

BLCA (n=832)  
 i-tRF & exclusive (n=162)  
 3' terminus relative to 5' stem of T-loop (n=30)

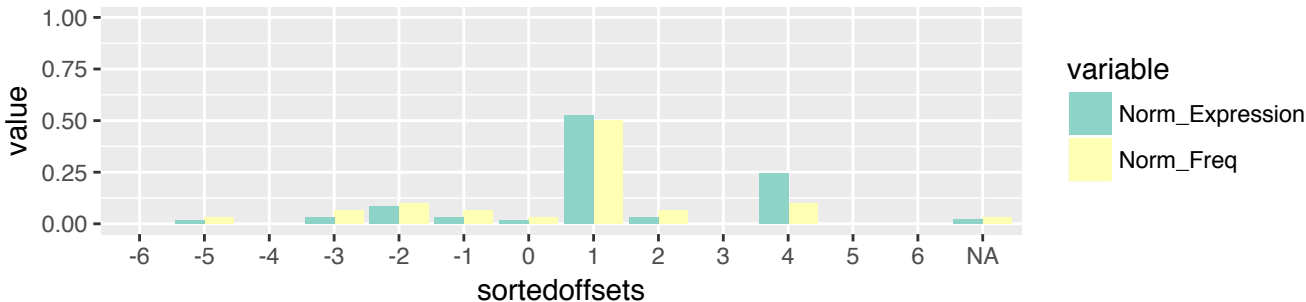

BLCA (n=832)  
 i-tRF & exclusive (n=162)  
 3' terminus relative to 5' stem of T-loop (n=30)

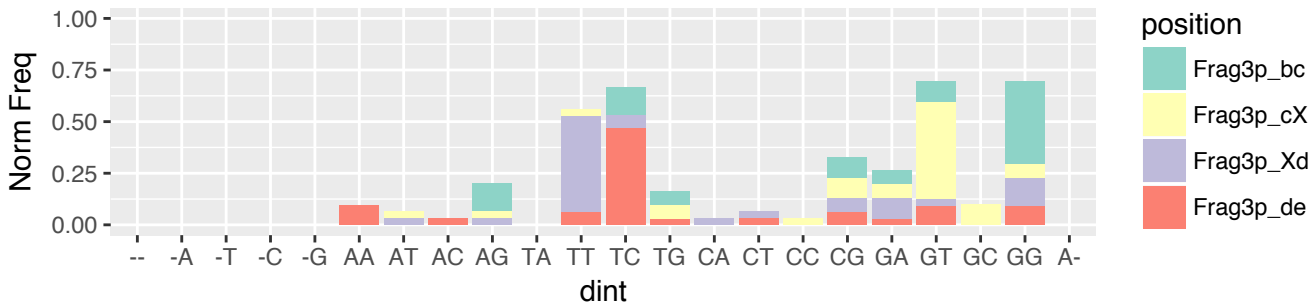

BLCA (n=832)  
 i-tRF & exclusive (n=162)  
 3' terminus relative to 5' stem of T-loop (n=30)

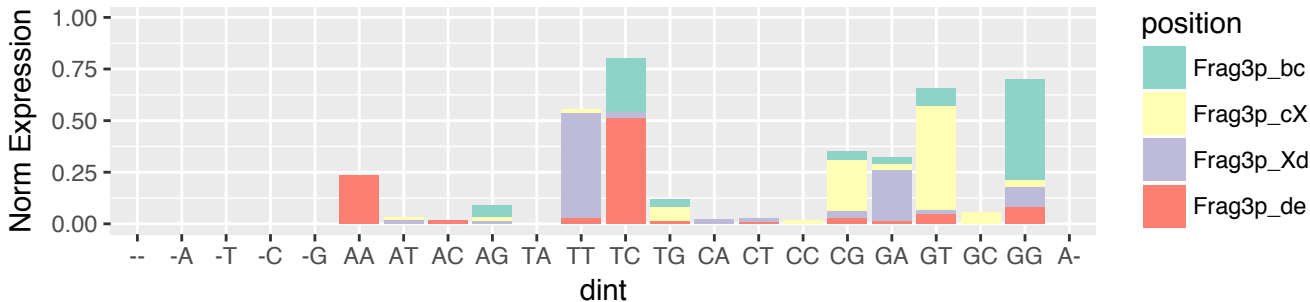



BLCA (n=832)  
i-tRF & exclusive (n=162)  
3' terminus relative to 3' stem of T-loop (n=42)

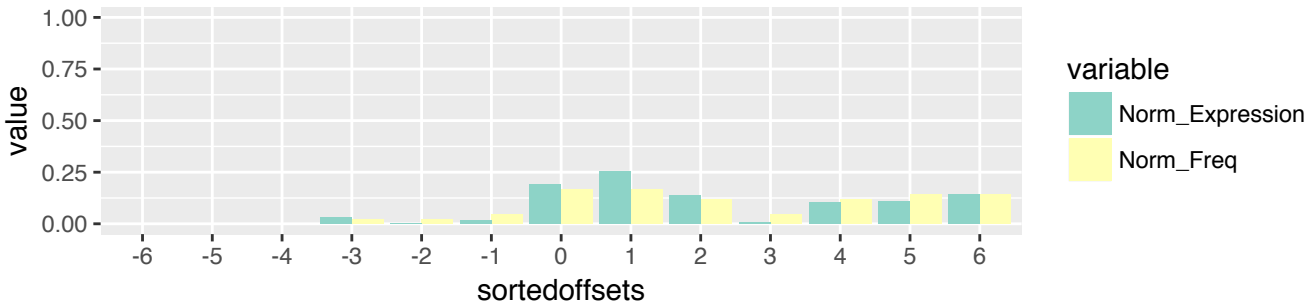

BLCA (n=832)  
i-tRF & exclusive (n=162)  
3' terminus relative to 3' stem of T-loop (n=42)

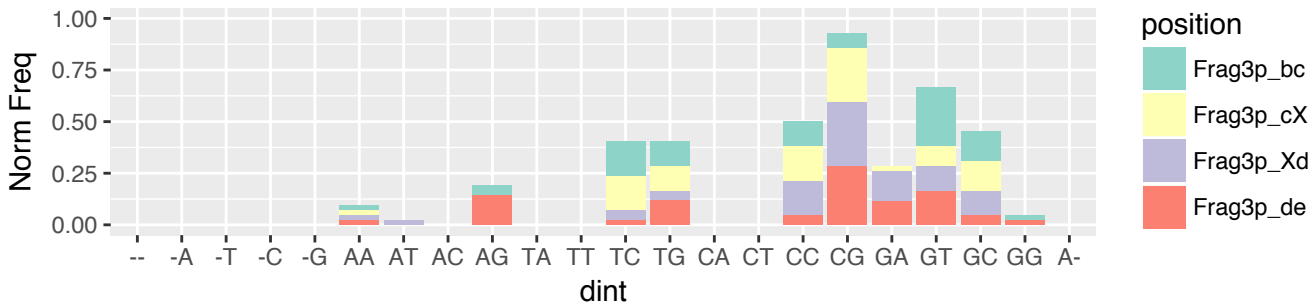

BLCA (n=832)  
i-tRF & exclusive (n=162)  
3' terminus relative to 3' stem of T-loop (n=42)

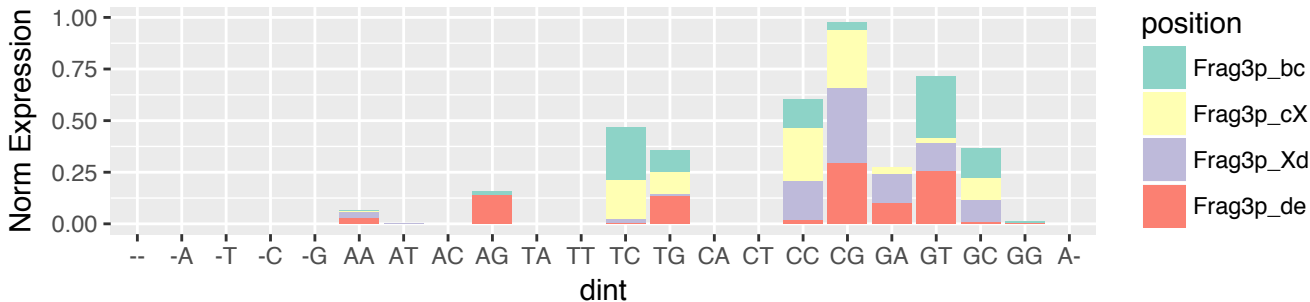

BLCA (n=832)  
i-tRF & exclusive (n=162)  
3' terminus relative to 3' end of the tRNA (n=20)

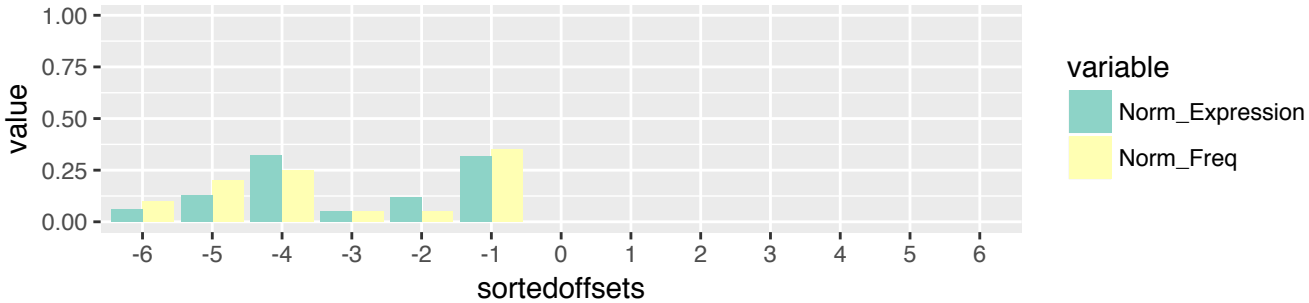

BLCA (n=832)  
i-tRF & exclusive (n=162)  
3' terminus relative to 3' end of the tRNA (n=20)

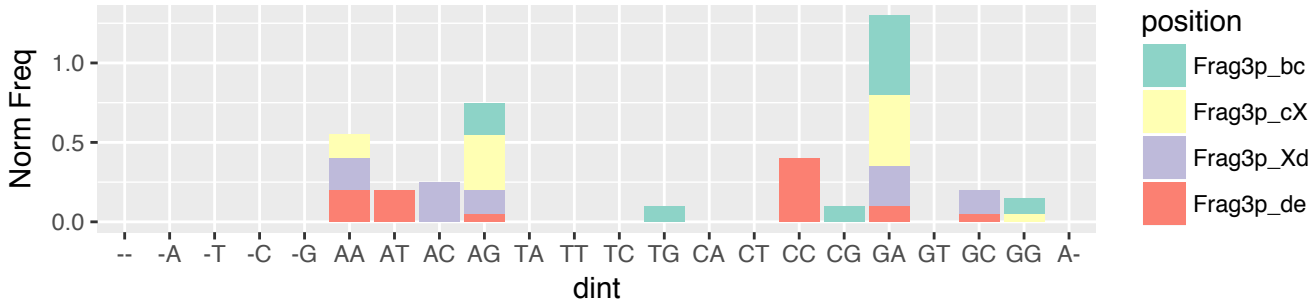

BLCA (n=832)  
i-tRF & exclusive (n=162)  
3' terminus relative to 3' end of the tRNA (n=20)

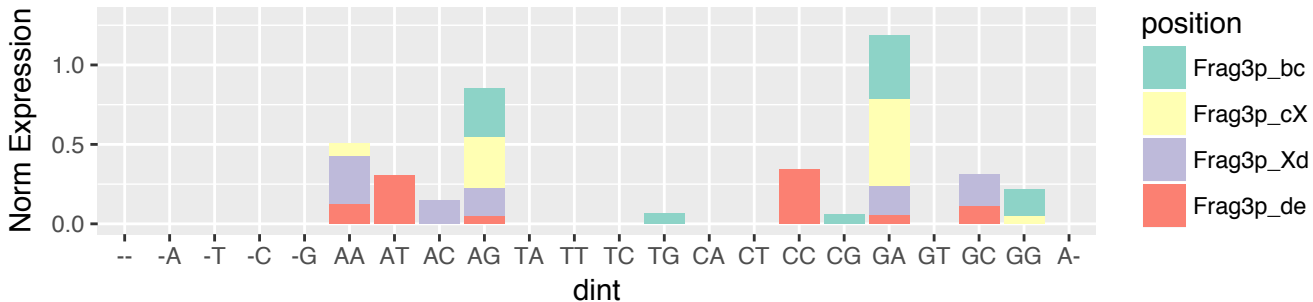

BLCA (n=832)  
 3'-tRF & exclusive (n=146)  
 5' terminus relative to 5' stem of T-loop (n=94)

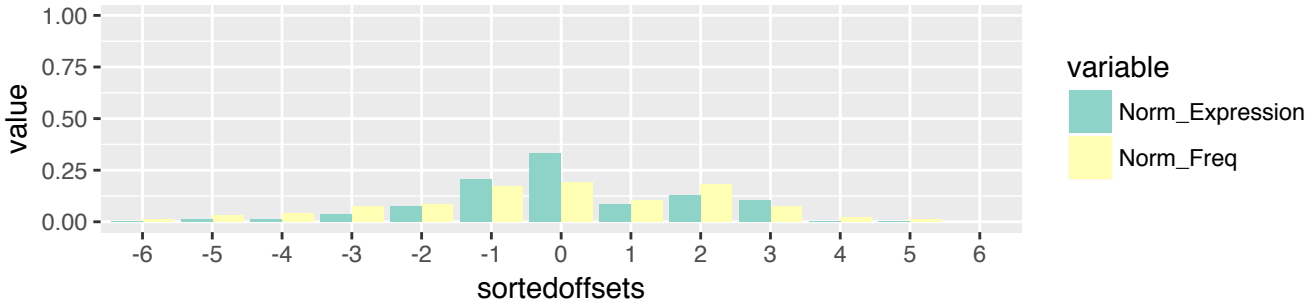

BLCA (n=832)  
 3'-tRF & exclusive (n=146)  
 5' terminus relative to 5' stem of T-loop (n=94)

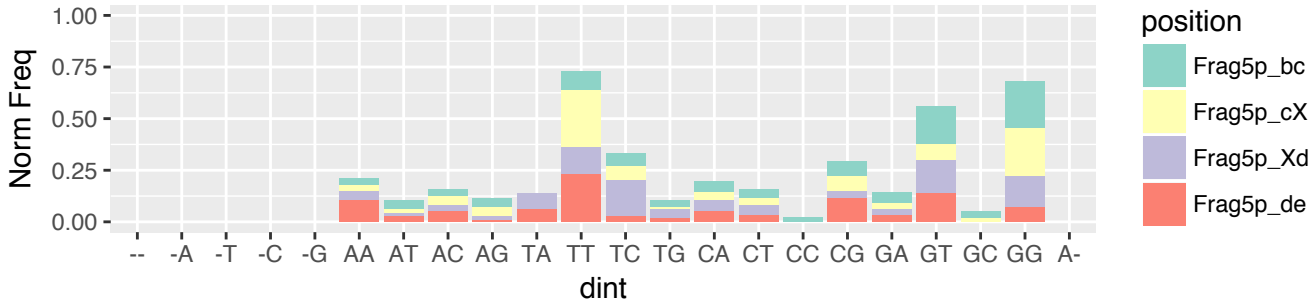

BLCA (n=832)  
 3'-tRF & exclusive (n=146)  
 5' terminus relative to 5' stem of T-loop (n=94)

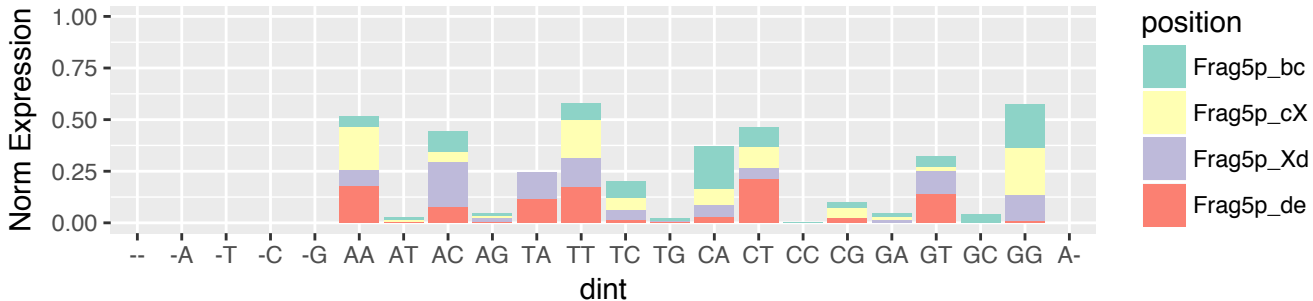

BLCA (n=832)  
 3'-tRF & exclusive (n=146)  
 5' terminus relative to 3' stem of T-loop (n=52)

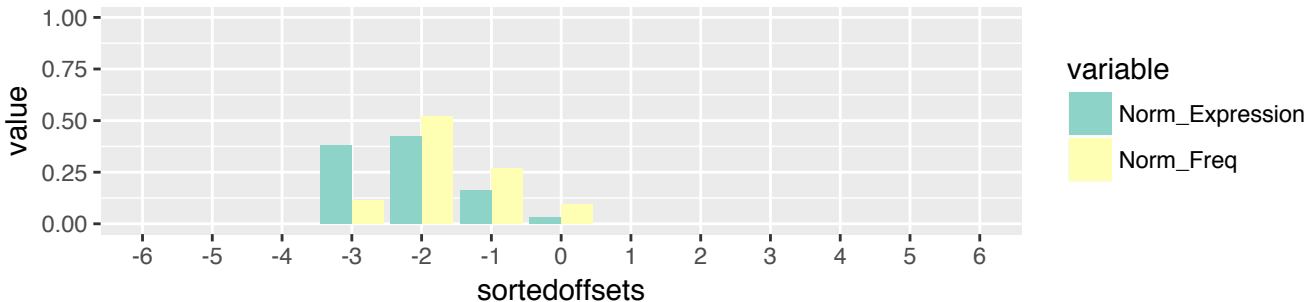

BLCA (n=832)  
 3'-tRF & exclusive (n=146)  
 5' terminus relative to 3' stem of T-loop (n=52)

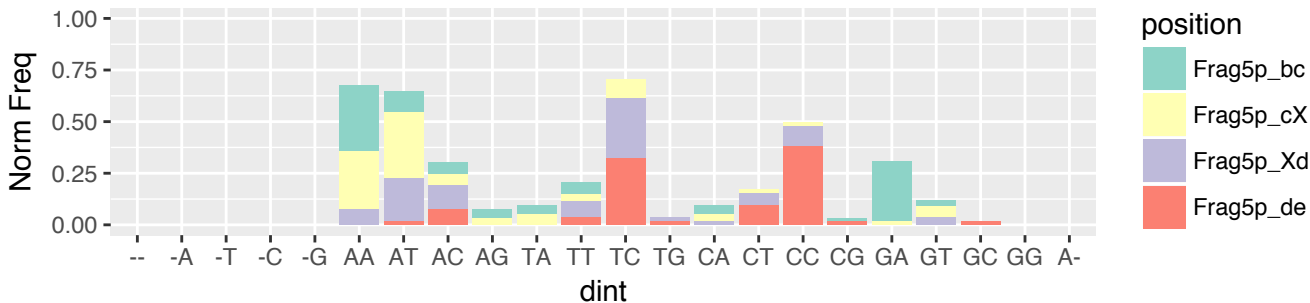

BLCA (n=832)  
 3'-tRF & exclusive (n=146)  
 5' terminus relative to 3' stem of T-loop (n=52)

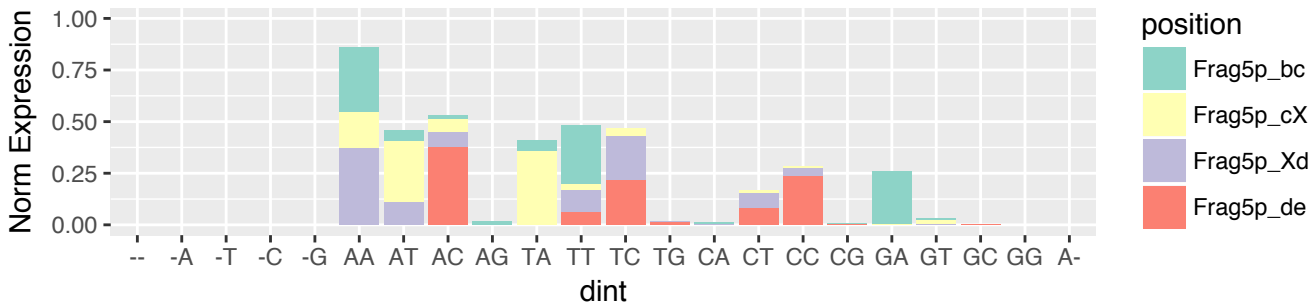

BLCA (n=832)  
 3'-tRF & exclusive (n=146)  
 3' terminus relative to 3' end of the tRNA (n=146)

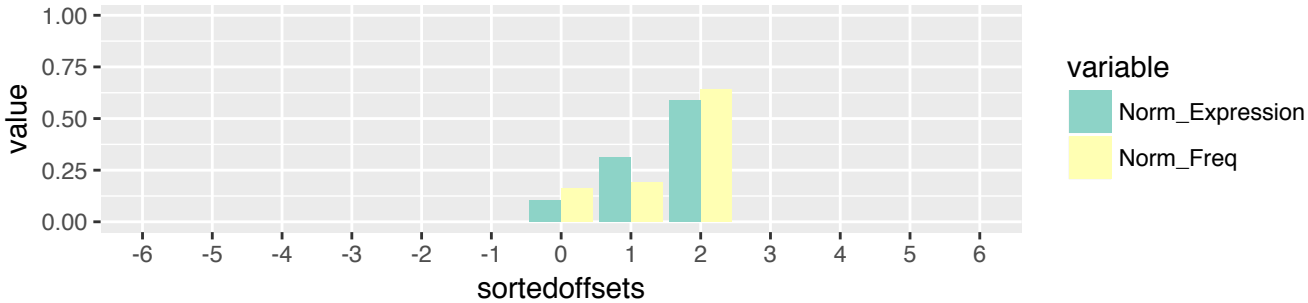

BLCA (n=832)  
 3'-tRF & exclusive (n=146)  
 3' terminus relative to 3' end of the tRNA (n=146)

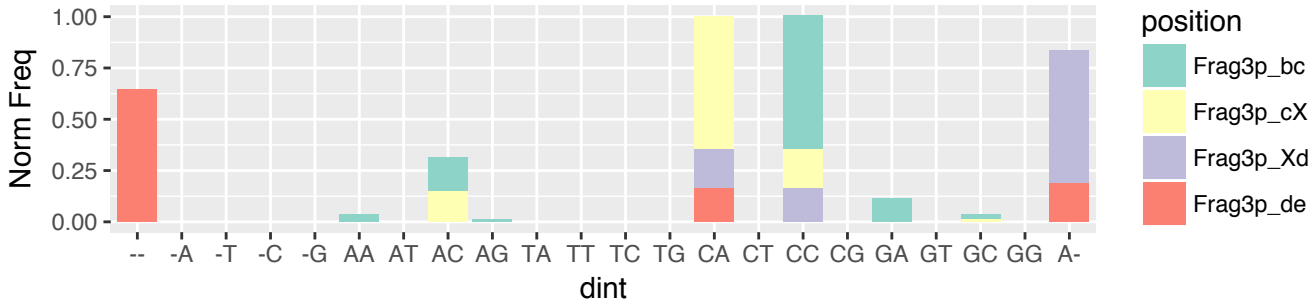

BLCA (n=832)  
 3'-tRF & exclusive (n=146)  
 3' terminus relative to 3' end of the tRNA (n=146)

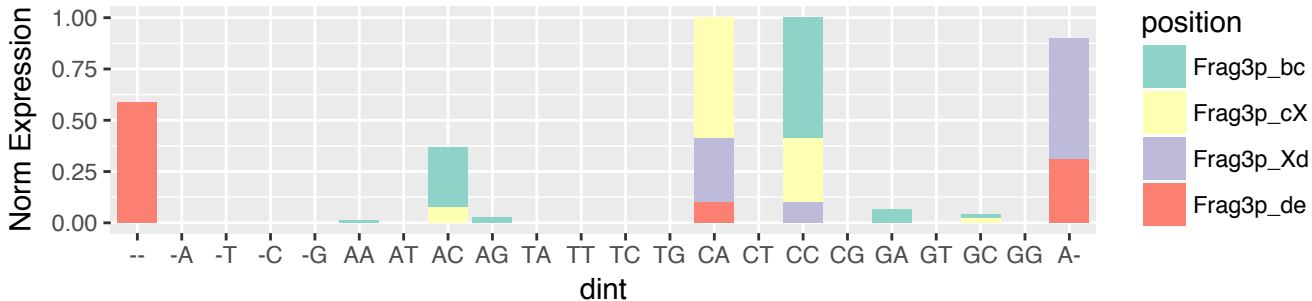

BRCA (n=1061)  
 5'-half & exclusive (n=4)  
 5' terminus relative to 5' end of the tRNA (n=4)

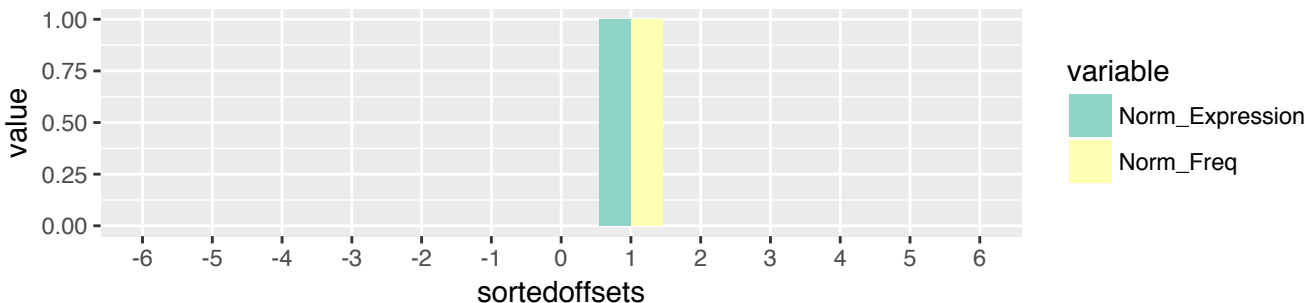

BRCA (n=1061)  
 5'-half & exclusive (n=4)  
 5' terminus relative to 5' end of the tRNA (n=4)

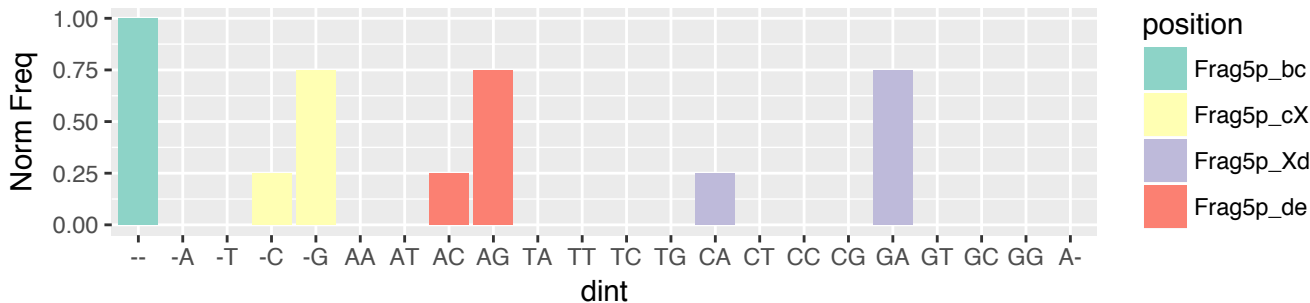

BRCA (n=1061)  
 5'-half & exclusive (n=4)  
 5' terminus relative to 5' end of the tRNA (n=4)

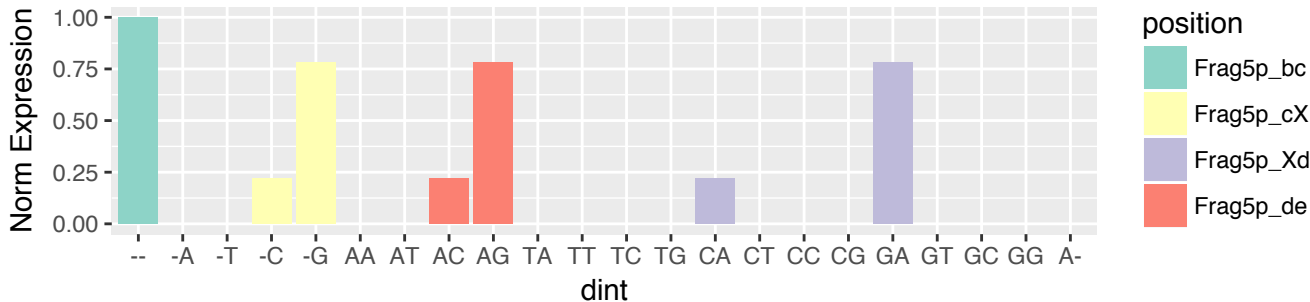

BRCA (n=1061)  
 5'-half & exclusive (n=4)  
 3' terminus relative to 5' stem of A-loop (n=4)

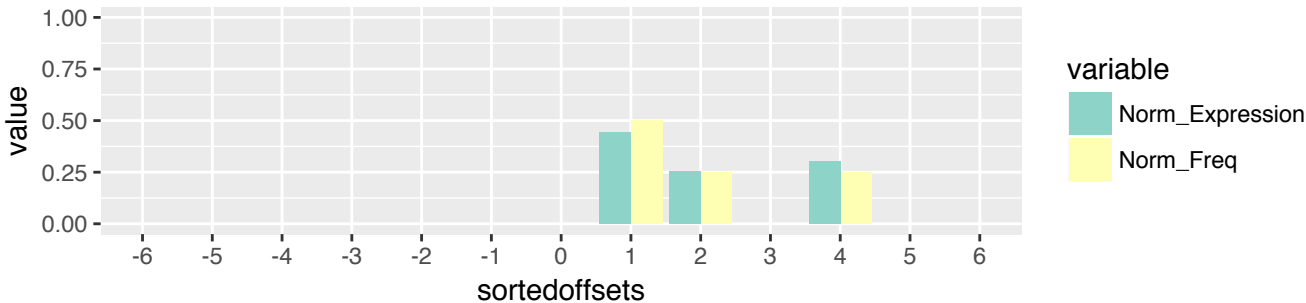

BRCA (n=1061)  
 5'-half & exclusive (n=4)  
 3' terminus relative to 5' stem of A-loop (n=4)

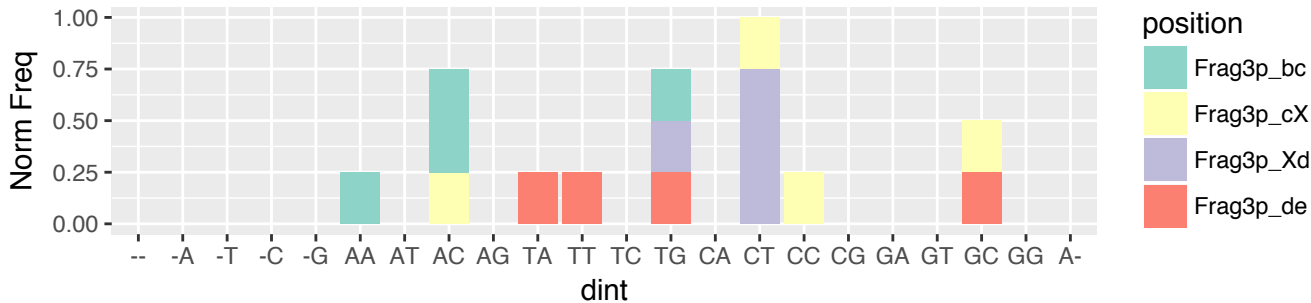

BRCA (n=1061)  
 5'-half & exclusive (n=4)  
 3' terminus relative to 5' stem of A-loop (n=4)

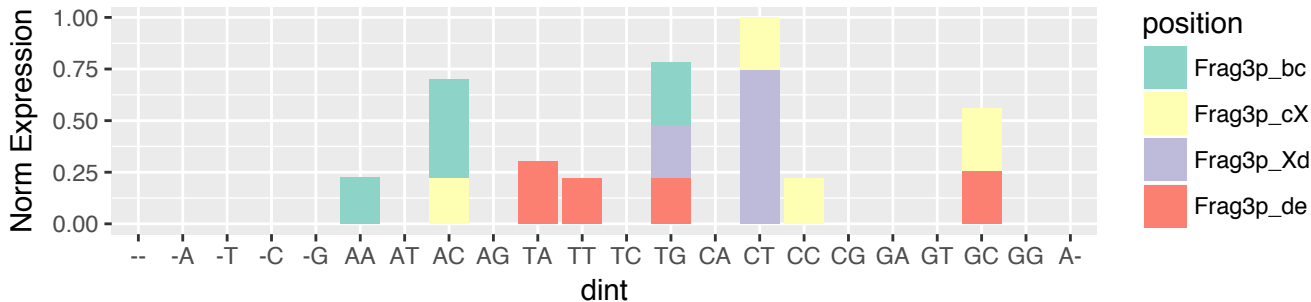

BRCA (n=1061)  
 5'-tRF & exclusive (n=175)  
 5' terminus relative to 5' end of the tRNA (n=175)

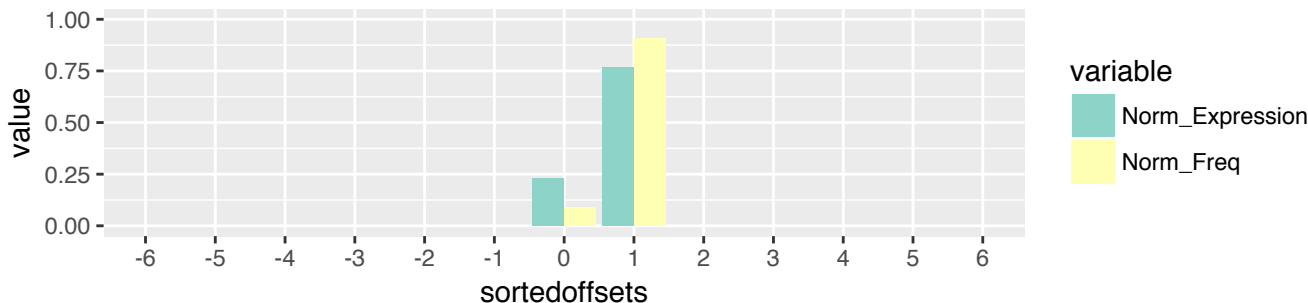

BRCA (n=1061)  
 5'-tRF & exclusive (n=175)  
 5' terminus relative to 5' end of the tRNA (n=175)

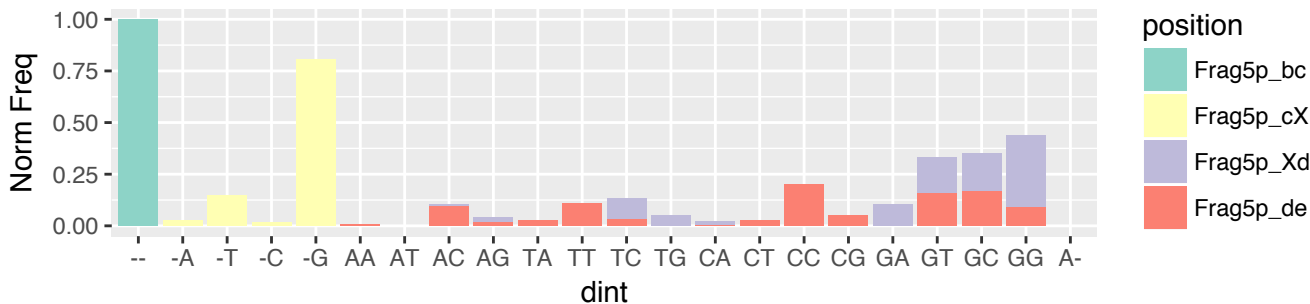

BRCA (n=1061)  
 5'-tRF & exclusive (n=175)  
 5' terminus relative to 5' end of the tRNA (n=175)

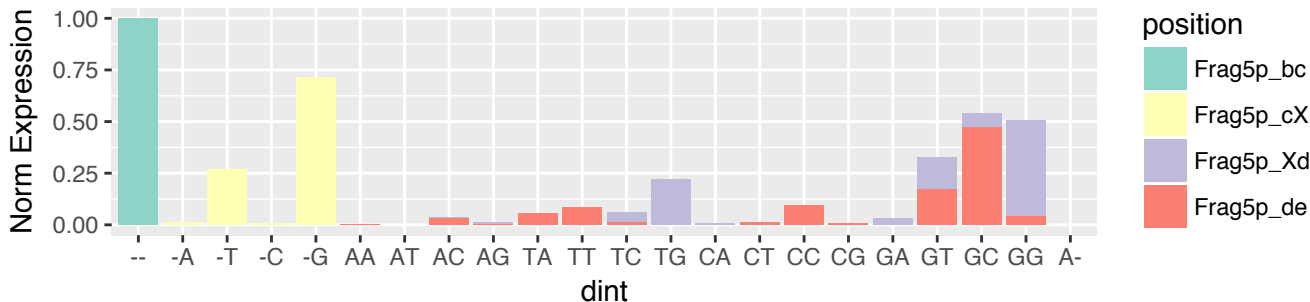



BRCA (n=1061)  
 5'-tRF & exclusive (n=175)  
 3' terminus relative to 5' stem of D-loop (n=12)

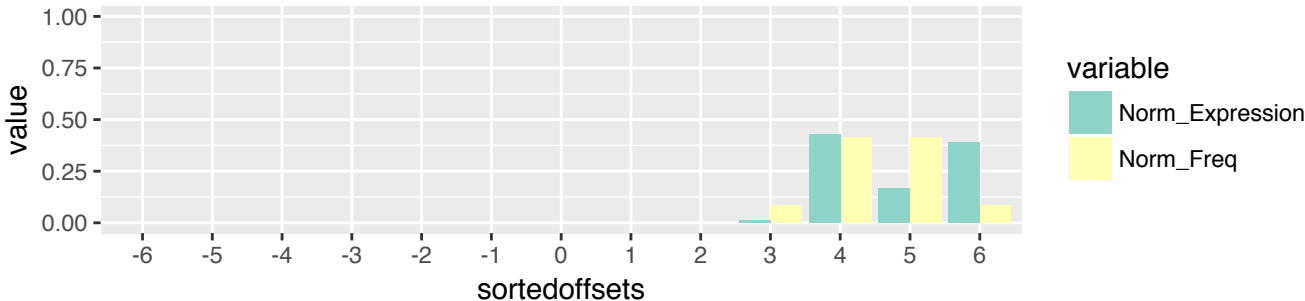

BRCA (n=1061)  
 5'-tRF & exclusive (n=175)  
 3' terminus relative to 5' stem of D-loop (n=12)

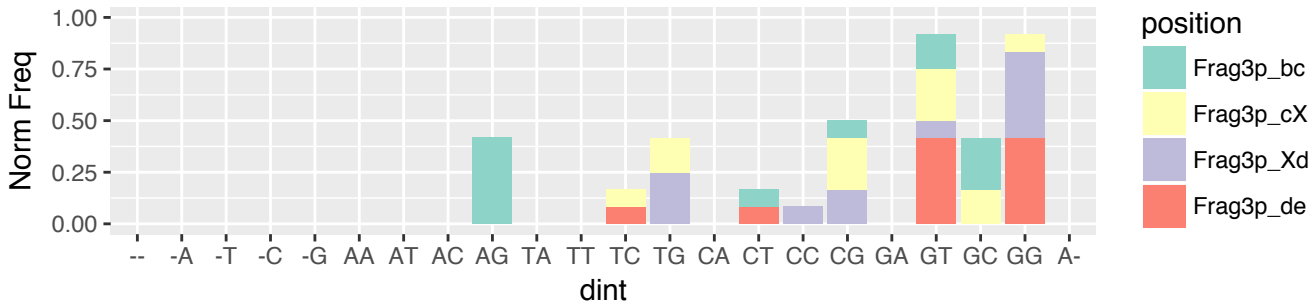

BRCA (n=1061)  
 5'-tRF & exclusive (n=175)  
 3' terminus relative to 5' stem of D-loop (n=12)

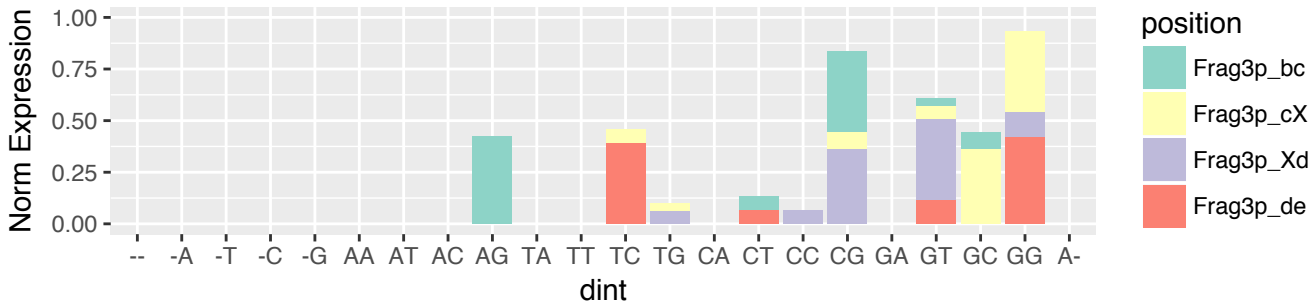

BRCA (n=1061)  
 5'-tRF & exclusive (n=175)  
 3' terminus relative to 3' stem of D-loop (n=154)

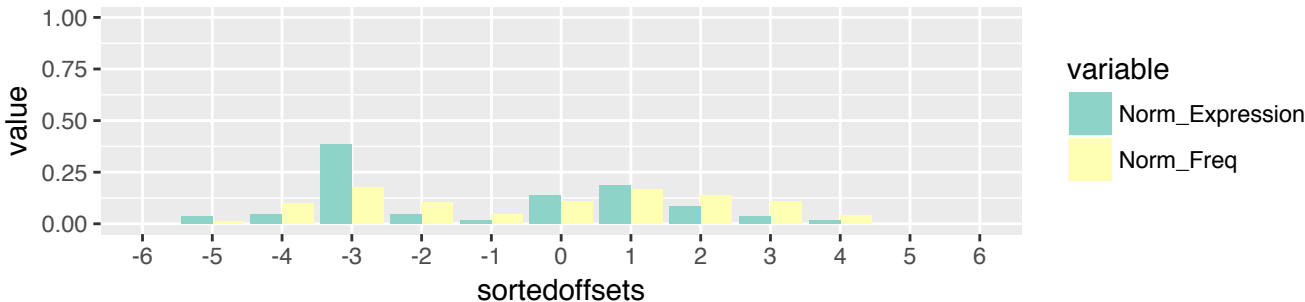

BRCA (n=1061)  
 5'-tRF & exclusive (n=175)  
 3' terminus relative to 3' stem of D-loop (n=154)

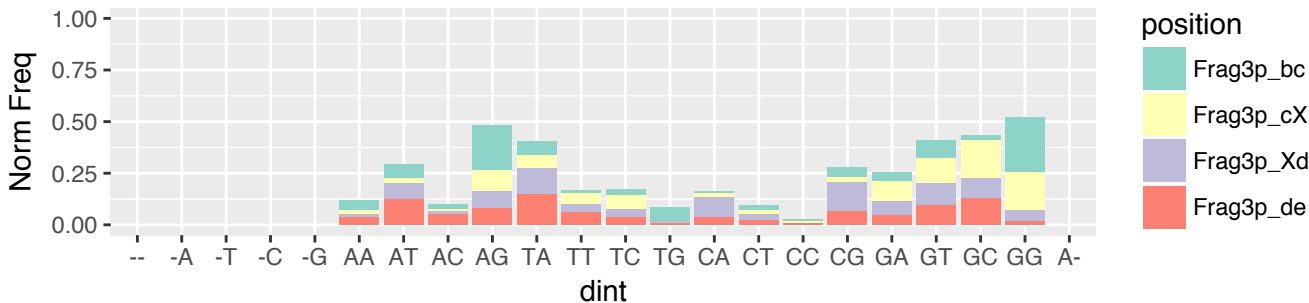

BRCA (n=1061)  
 5'-tRF & exclusive (n=175)  
 3' terminus relative to 3' stem of D-loop (n=154)

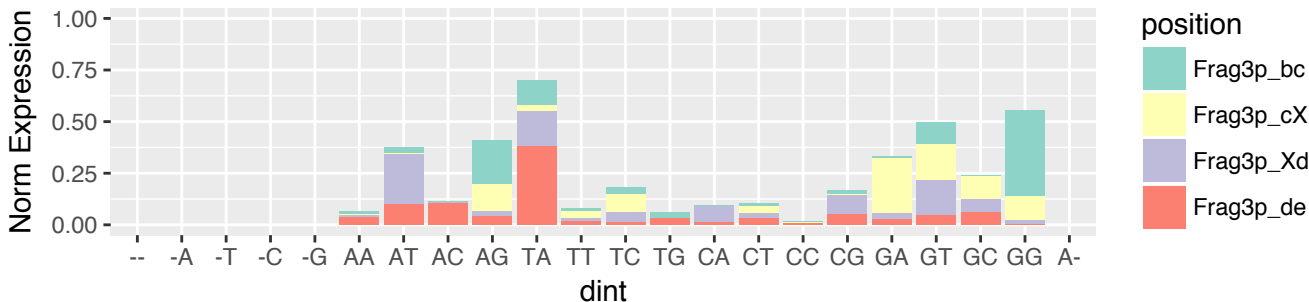

BRCA (n=1061)  
 5'-tRF & exclusive (n=175)  
 3' terminus relative to 5' stem of A-loop (n=6)

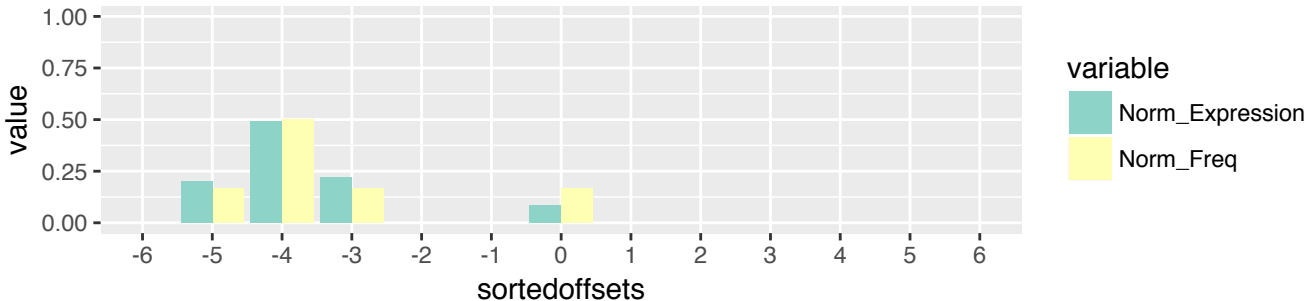

BRCA (n=1061)  
 5'-tRF & exclusive (n=175)  
 3' terminus relative to 5' stem of A-loop (n=6)

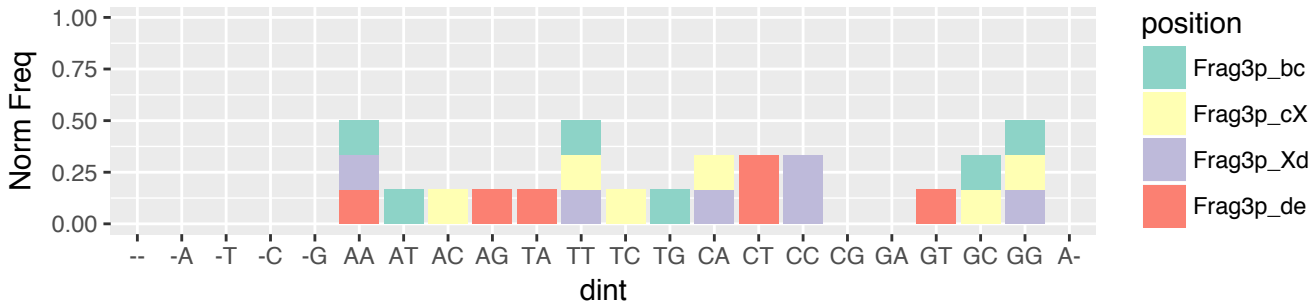

BRCA (n=1061)  
 5'-tRF & exclusive (n=175)  
 3' terminus relative to 5' stem of A-loop (n=6)

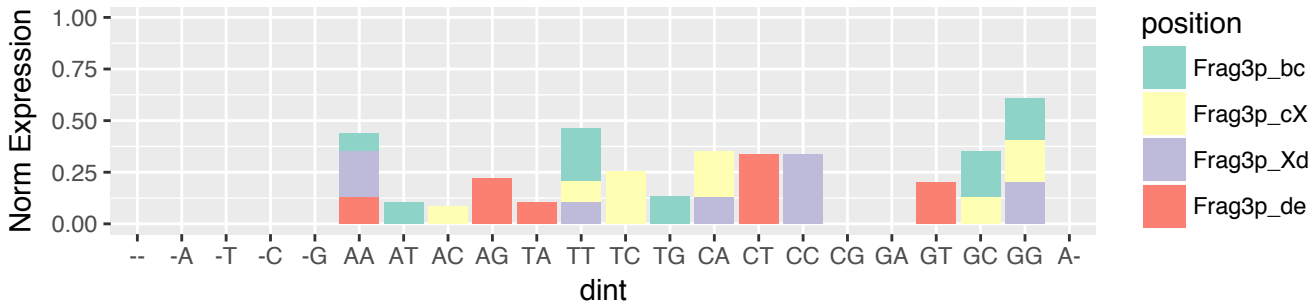

BRCA (n=1061)  
 5'-tRF & exclusive (n=175)  
 3' terminus relative to 3' stem of A-loop (n=3)

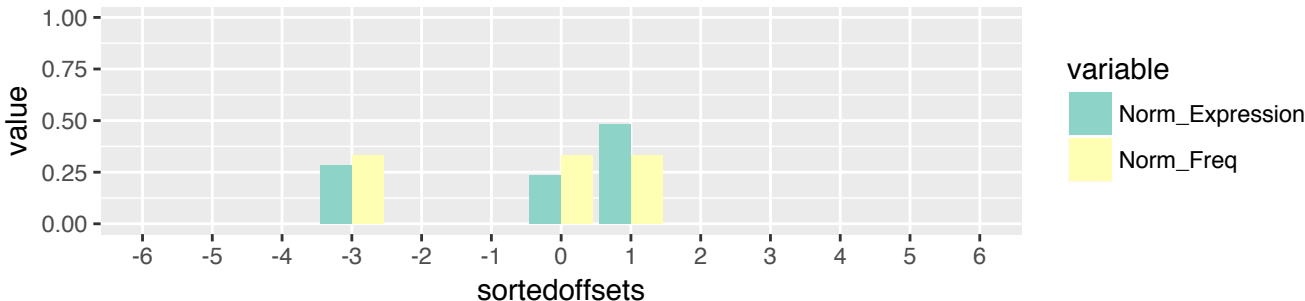

BRCA (n=1061)  
 5'-tRF & exclusive (n=175)  
 3' terminus relative to 3' stem of A-loop (n=3)

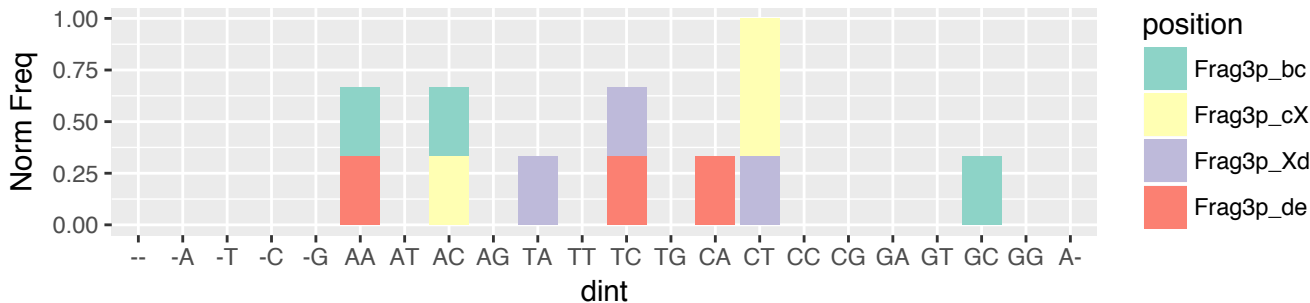

BRCA (n=1061)  
 5'-tRF & exclusive (n=175)  
 3' terminus relative to 3' stem of A-loop (n=3)

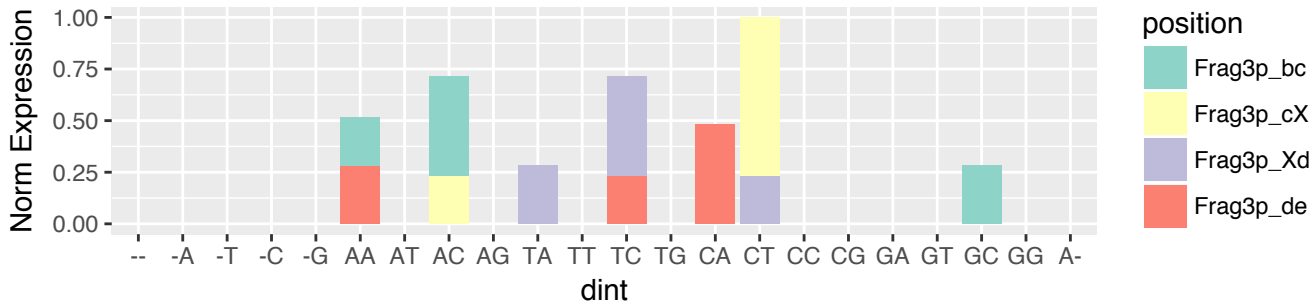

BRCA (n=1061)  
 i-tRF & exclusive (n=217)  
 5' terminus relative to 5' end of the tRNA (n=6)

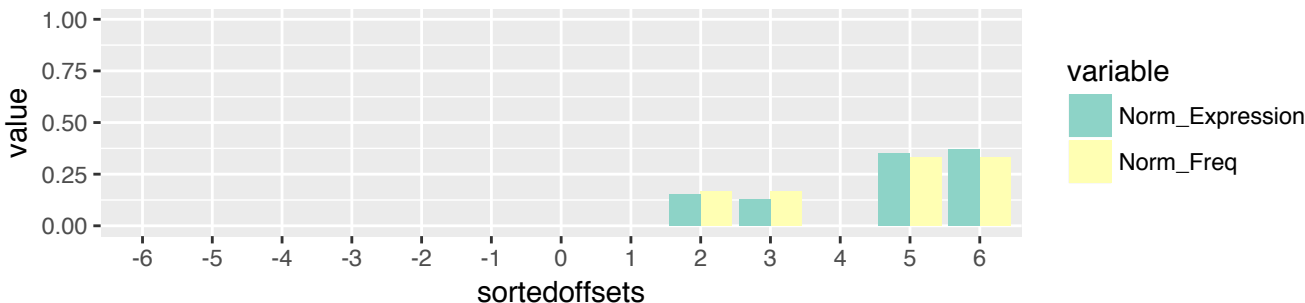

BRCA (n=1061)  
 i-tRF & exclusive (n=217)  
 5' terminus relative to 5' end of the tRNA (n=6)

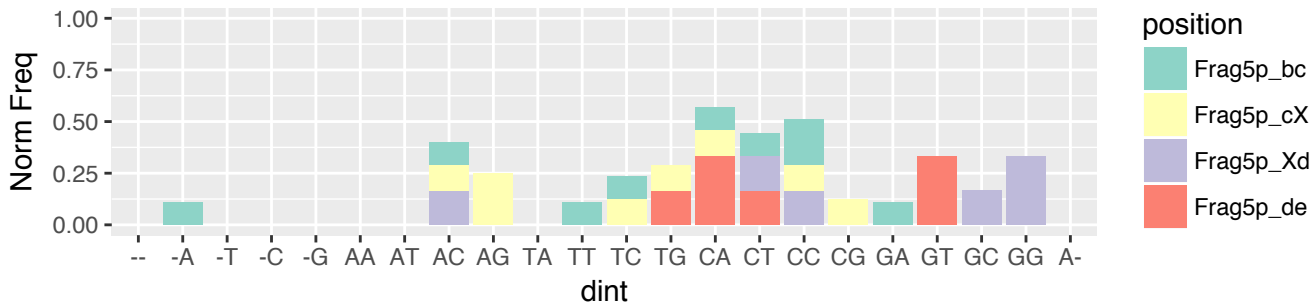

BRCA (n=1061)  
 i-tRF & exclusive (n=217)  
 5' terminus relative to 5' end of the tRNA (n=6)

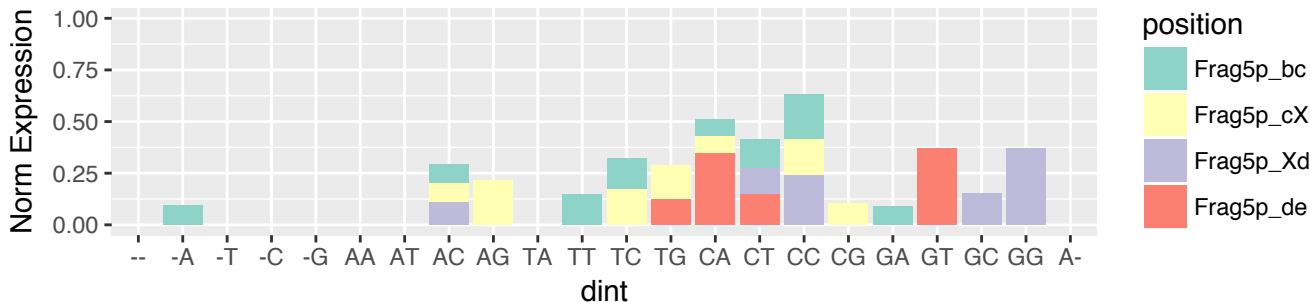

BRCA (n=1061)  
 i-tRF & exclusive (n=217)  
 5' terminus relative to 5' stem of D-loop (n=89)

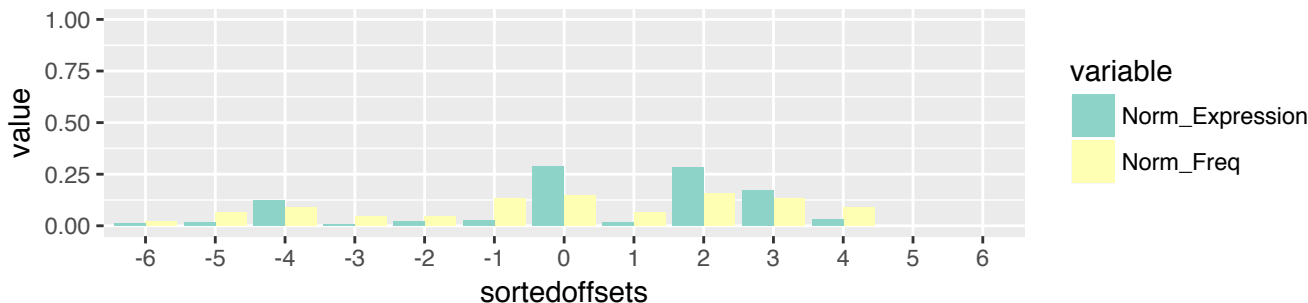

BRCA (n=1061)  
 i-tRF & exclusive (n=217)  
 5' terminus relative to 5' stem of D-loop (n=89)

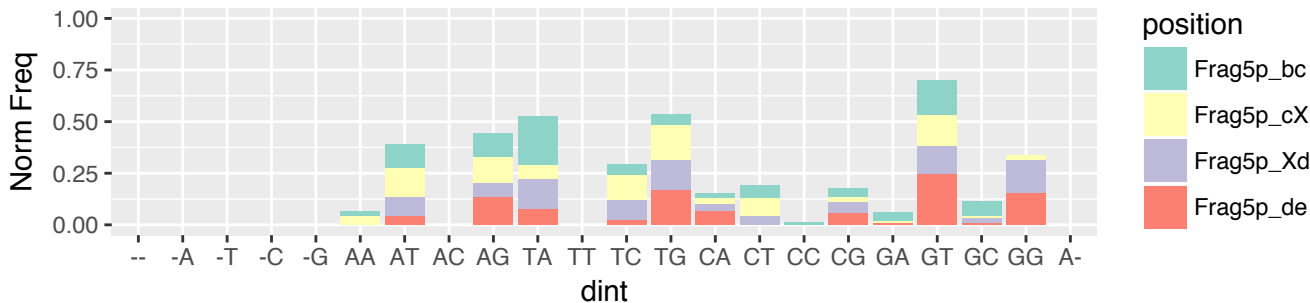

BRCA (n=1061)  
 i-tRF & exclusive (n=217)  
 5' terminus relative to 5' stem of D-loop (n=89)

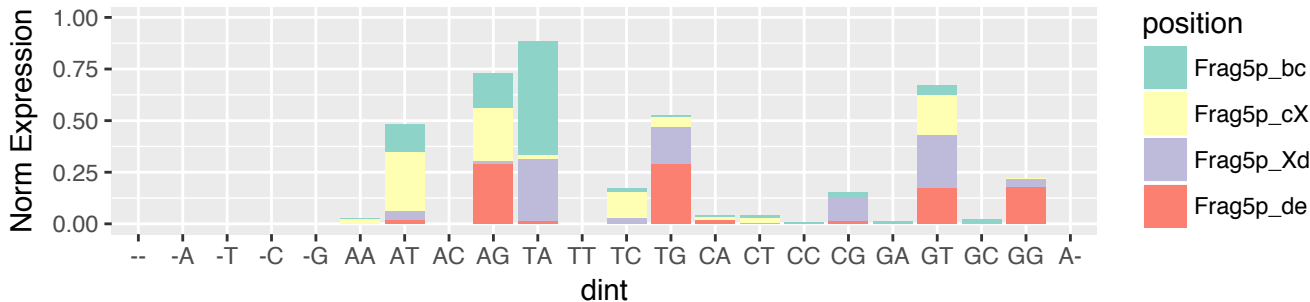

BRCA (n=1061)  
 i-tRF & exclusive (n=217)  
 5' terminus relative to 3' stem of D-loop (n=7)

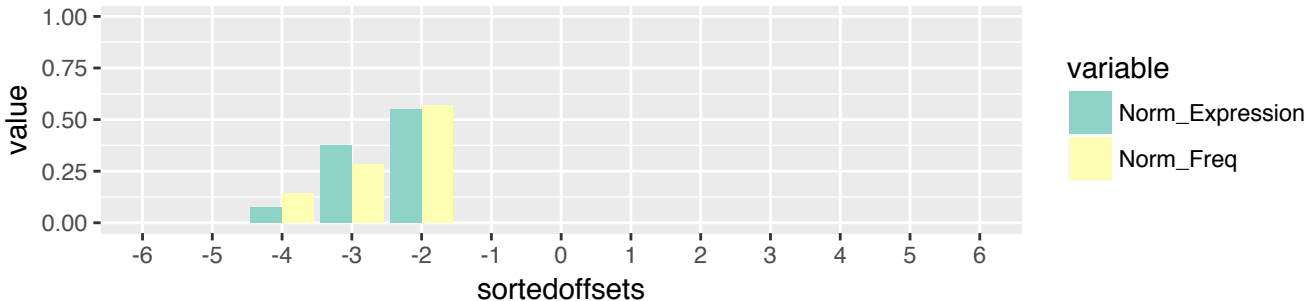

BRCA (n=1061)  
 i-tRF & exclusive (n=217)  
 5' terminus relative to 3' stem of D-loop (n=7)

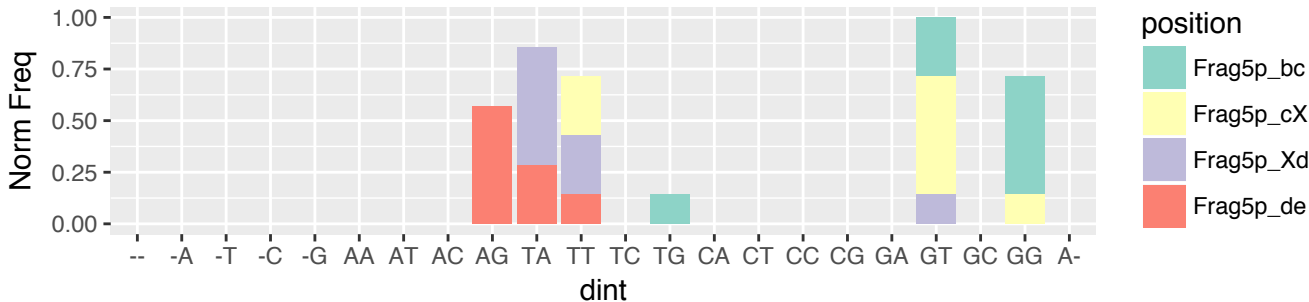

BRCA (n=1061)  
 i-tRF & exclusive (n=217)  
 5' terminus relative to 3' stem of D-loop (n=7)

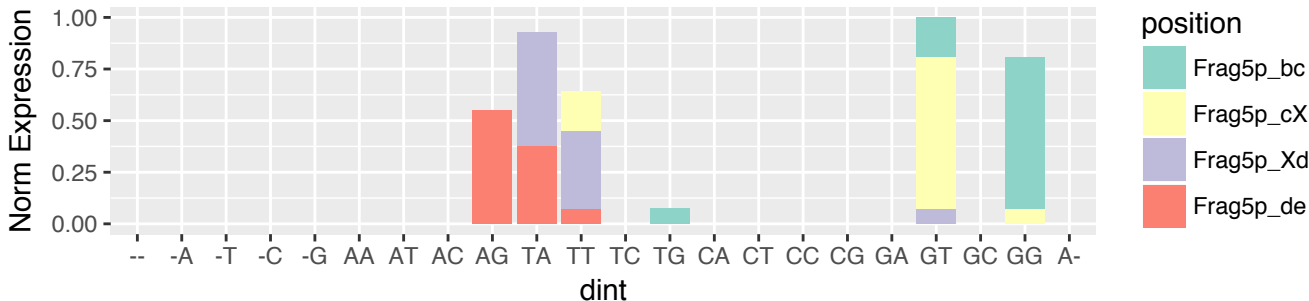

BRCA (n=1061)  
 i-tRF & exclusive (n=217)  
 5' terminus relative to 5' stem of A-loop (n=46)

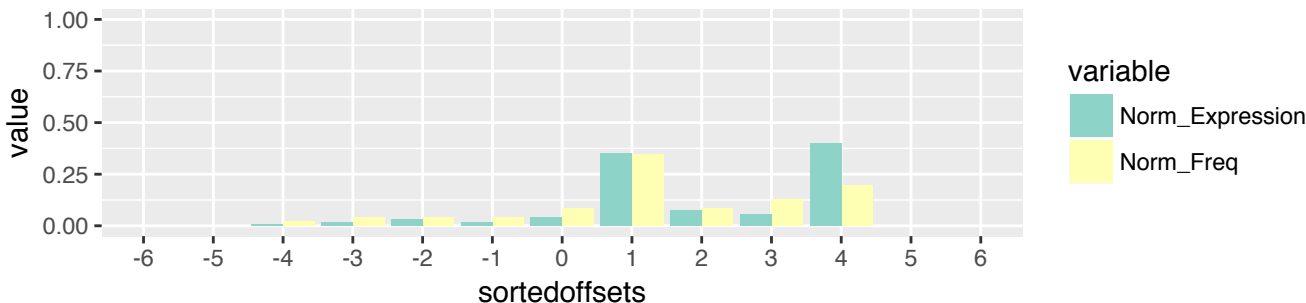

BRCA (n=1061)  
 i-tRF & exclusive (n=217)  
 5' terminus relative to 5' stem of A-loop (n=46)

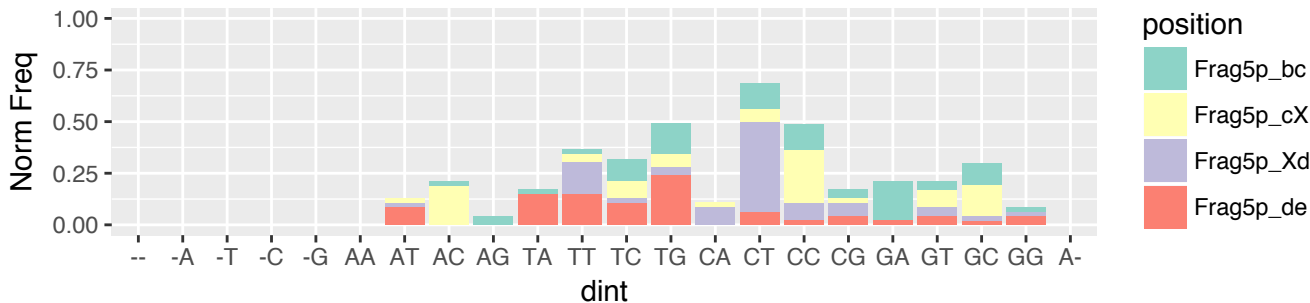

BRCA (n=1061)  
 i-tRF & exclusive (n=217)  
 5' terminus relative to 5' stem of A-loop (n=46)

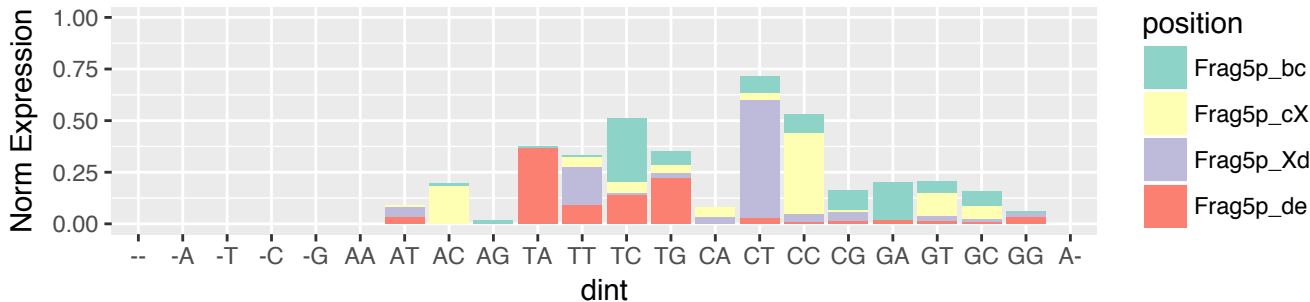



BRCA (n=1061)  
i-tRF & exclusive (n=217)  
5' terminus relative to 3' stem of A-loop (n=57)

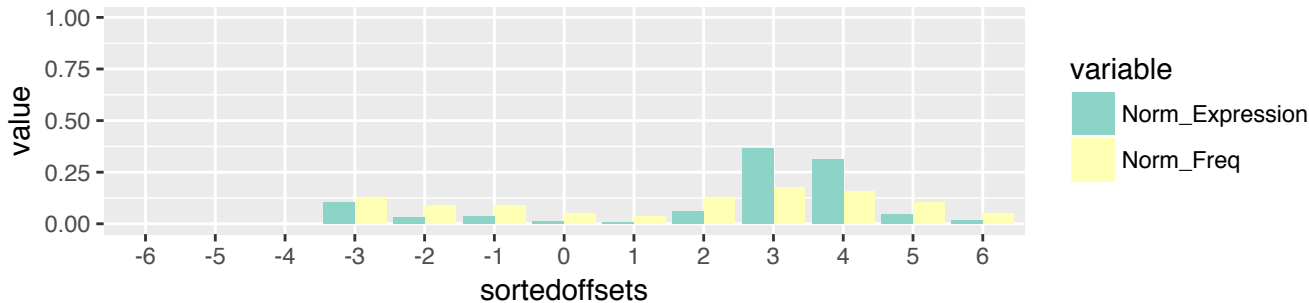

BRCA (n=1061)  
i-tRF & exclusive (n=217)  
5' terminus relative to 3' stem of A-loop (n=57)

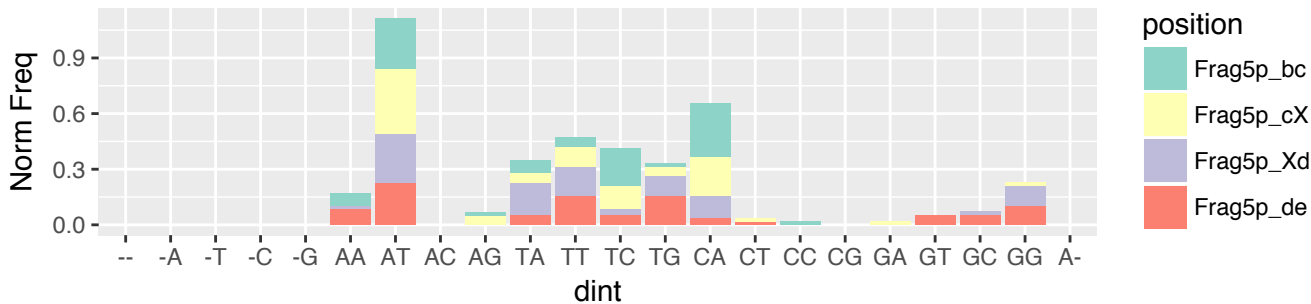

BRCA (n=1061)  
i-tRF & exclusive (n=217)  
5' terminus relative to 3' stem of A-loop (n=57)

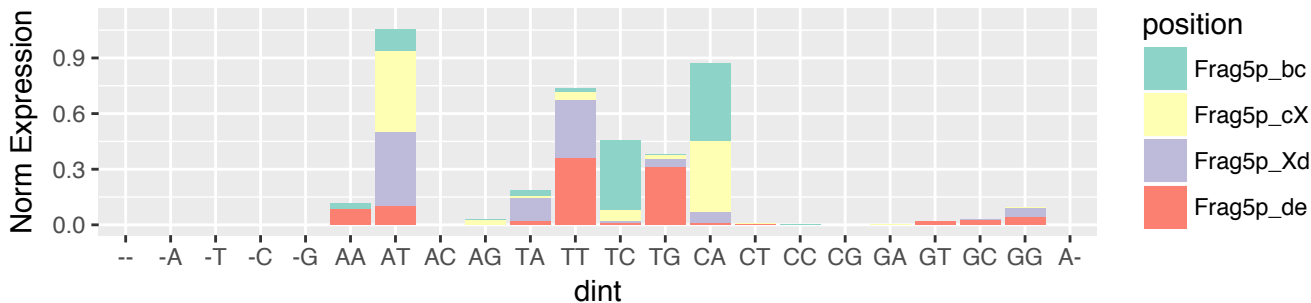

BRCA (n=1061)  
i-tRF & exclusive (n=217)  
5' terminus relative to 5' stem of T-loop (n=12)

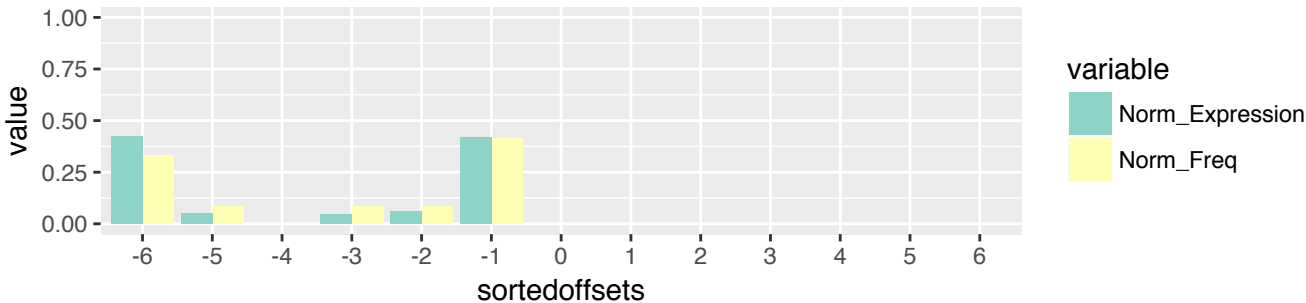

BRCA (n=1061)  
i-tRF & exclusive (n=217)  
5' terminus relative to 5' stem of T-loop (n=12)

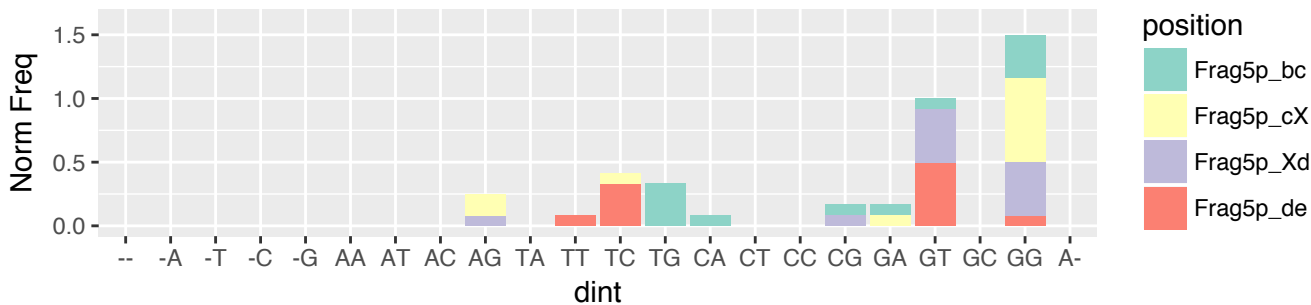

BRCA (n=1061)  
i-tRF & exclusive (n=217)  
5' terminus relative to 5' stem of T-loop (n=12)

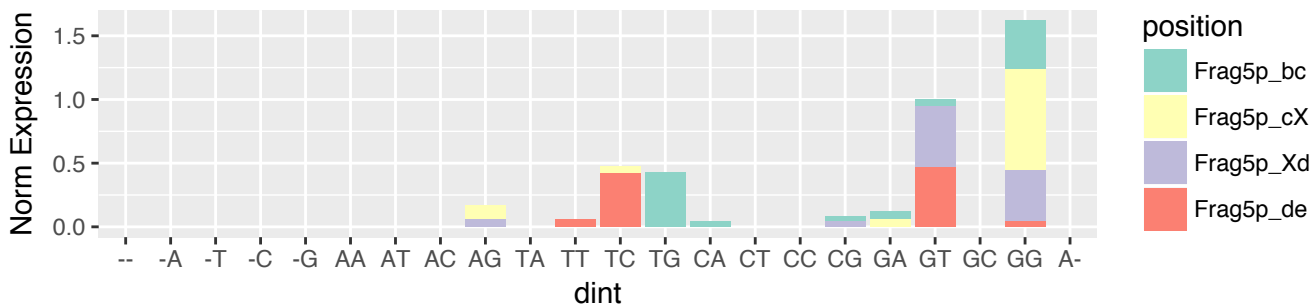

BRCA (n=1061)  
 i-tRF & exclusive (n=217)  
 3' terminus relative to 3' stem of D-loop (n=2)

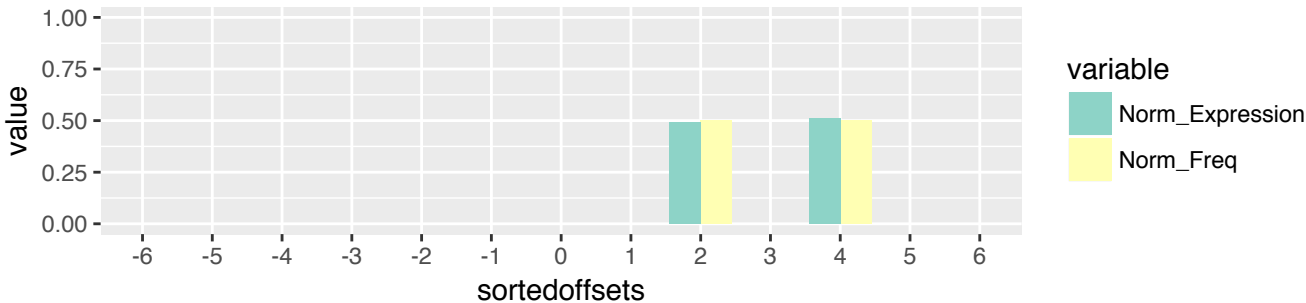

BRCA (n=1061)  
 i-tRF & exclusive (n=217)  
 3' terminus relative to 3' stem of D-loop (n=2)

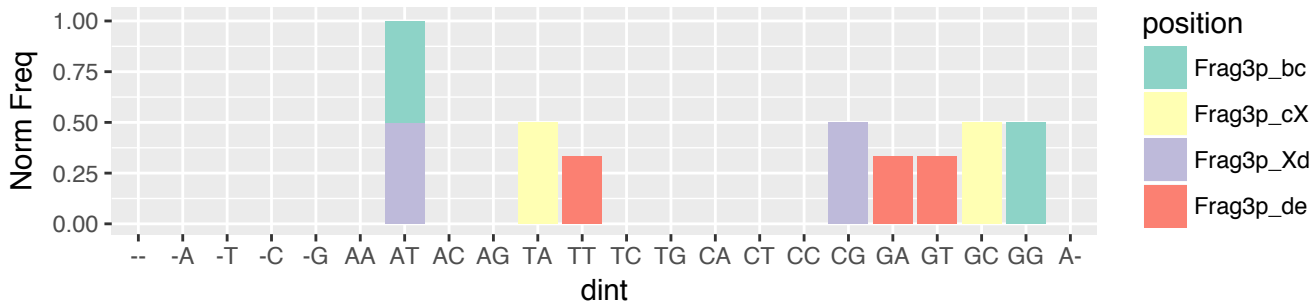

BRCA (n=1061)  
 i-tRF & exclusive (n=217)  
 3' terminus relative to 3' stem of D-loop (n=2)

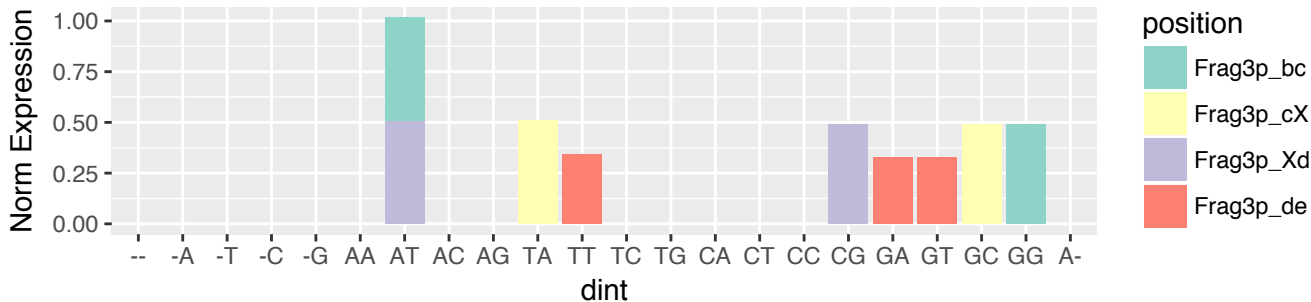

BRCA (n=1061)  
 i-tRF & exclusive (n=217)  
 3' terminus relative to 5' stem of A-loop (n=79)

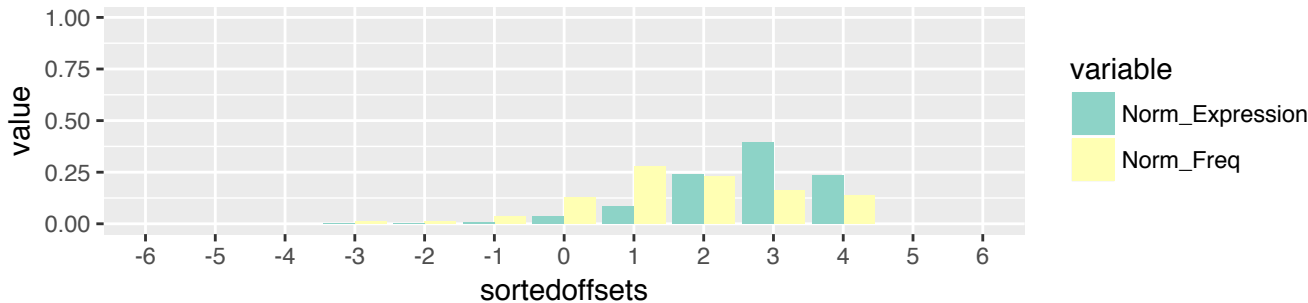

BRCA (n=1061)  
 i-tRF & exclusive (n=217)  
 3' terminus relative to 5' stem of A-loop (n=79)

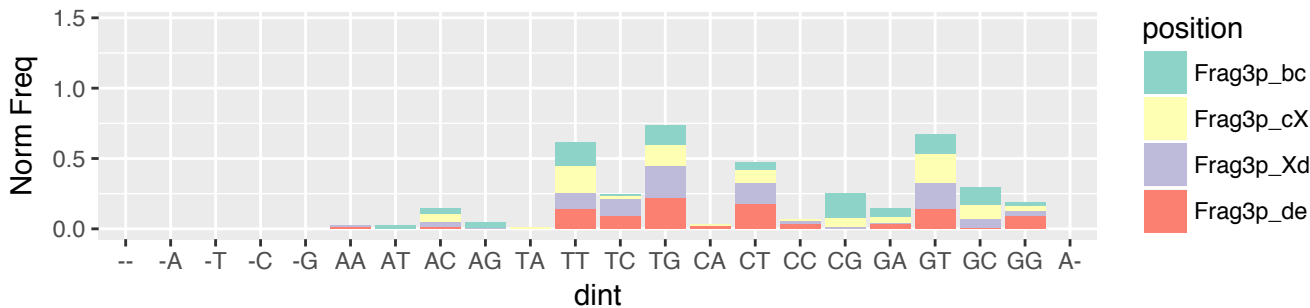

BRCA (n=1061)  
 i-tRF & exclusive (n=217)  
 3' terminus relative to 5' stem of A-loop (n=79)

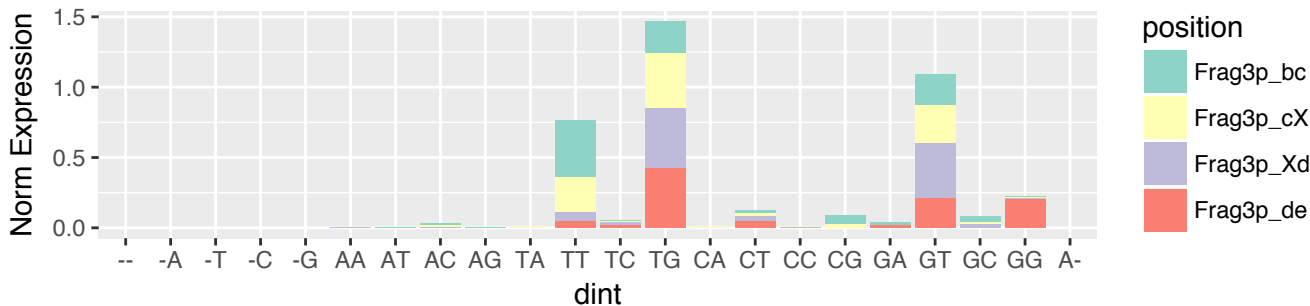

BRCA (n=1061)  
i-tRF & exclusive (n=217)  
3' terminus relative to 3' stem of A-loop (n=27)

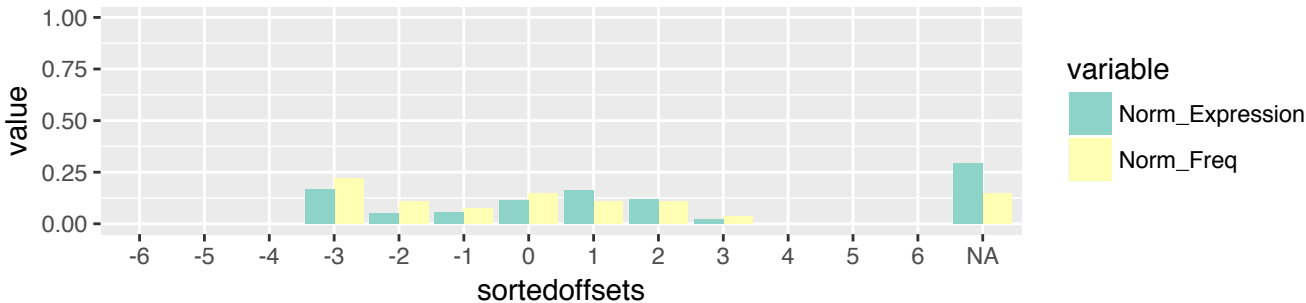

BRCA (n=1061)  
i-tRF & exclusive (n=217)  
3' terminus relative to 3' stem of A-loop (n=27)

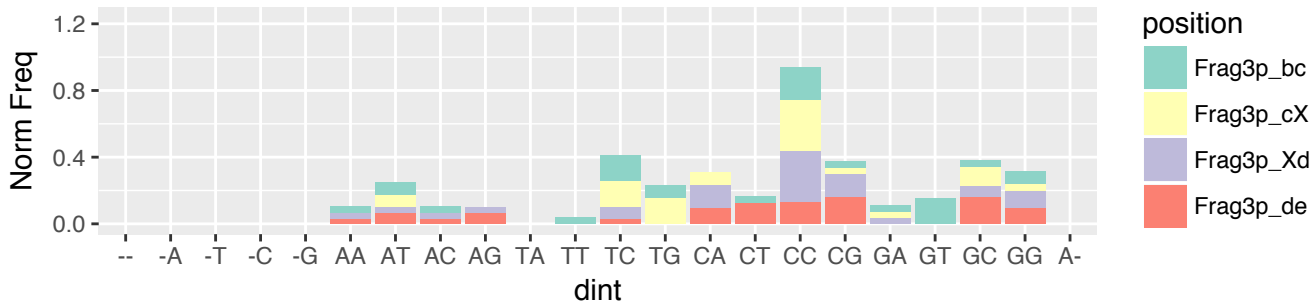

BRCA (n=1061)  
i-tRF & exclusive (n=217)  
3' terminus relative to 3' stem of A-loop (n=27)

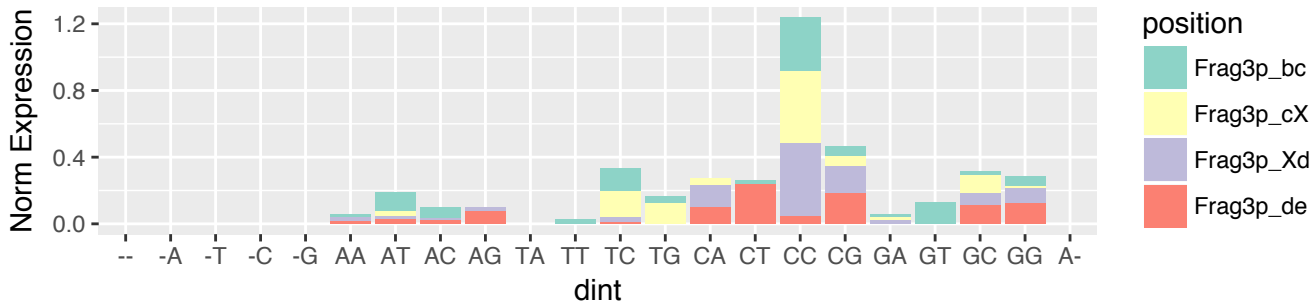

BRCA (n=1061)  
i-tRF & exclusive (n=217)  
3' terminus relative to 5' stem of T-loop (n=47)

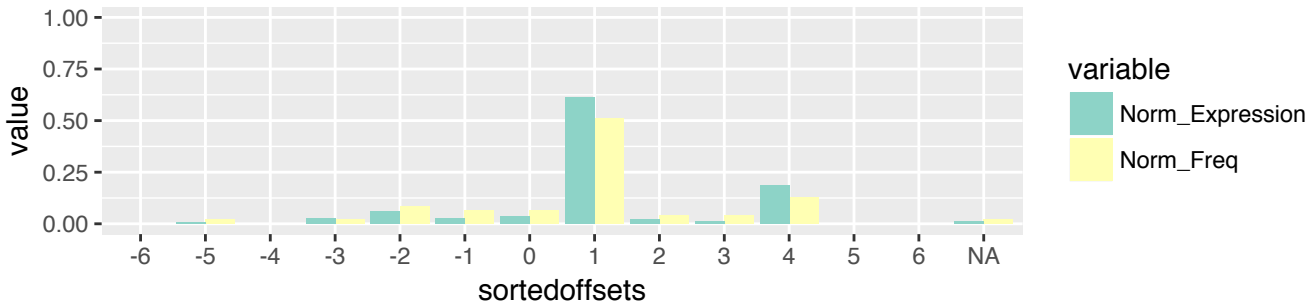

BRCA (n=1061)  
i-tRF & exclusive (n=217)  
3' terminus relative to 5' stem of T-loop (n=47)

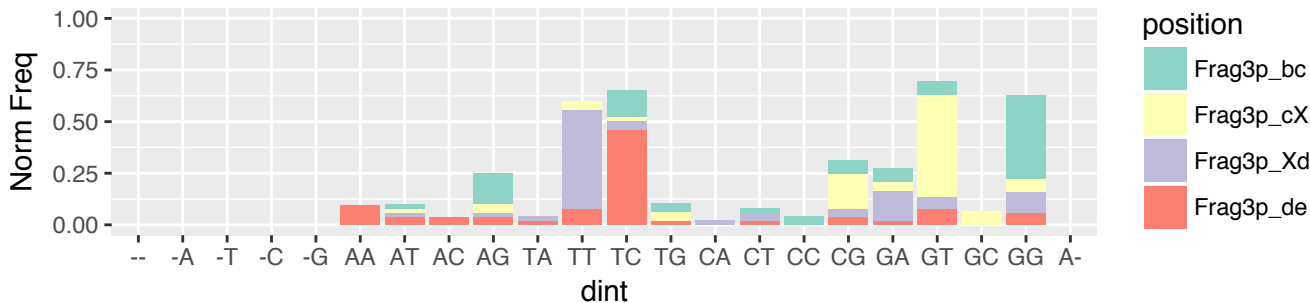

BRCA (n=1061)  
i-tRF & exclusive (n=217)  
3' terminus relative to 5' stem of T-loop (n=47)

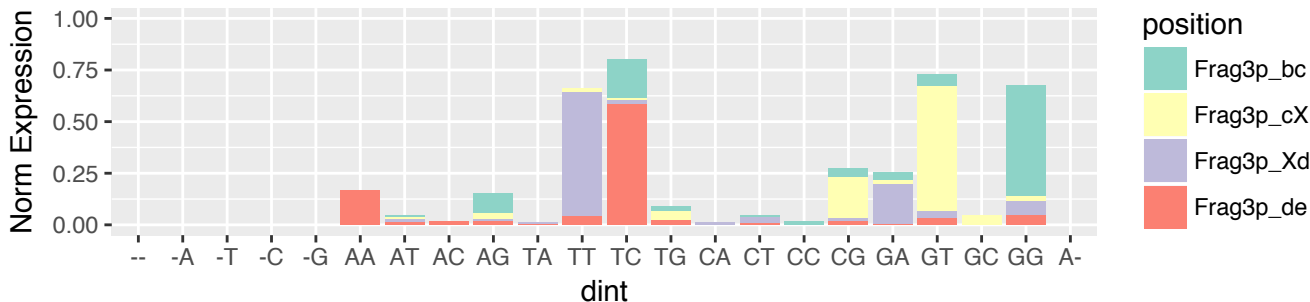

BRCA (n=1061)  
 i-tRF & exclusive (n=217)  
 3' terminus relative to 3' stem of T-loop (n=45)

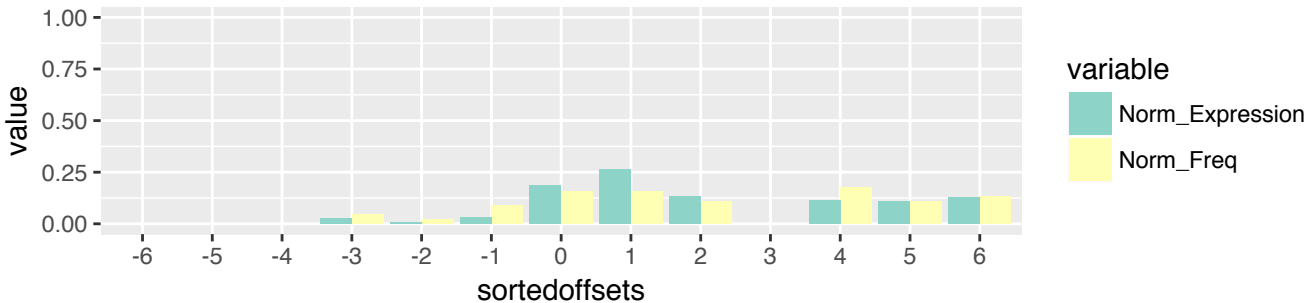

BRCA (n=1061)  
 i-tRF & exclusive (n=217)  
 3' terminus relative to 3' stem of T-loop (n=45)

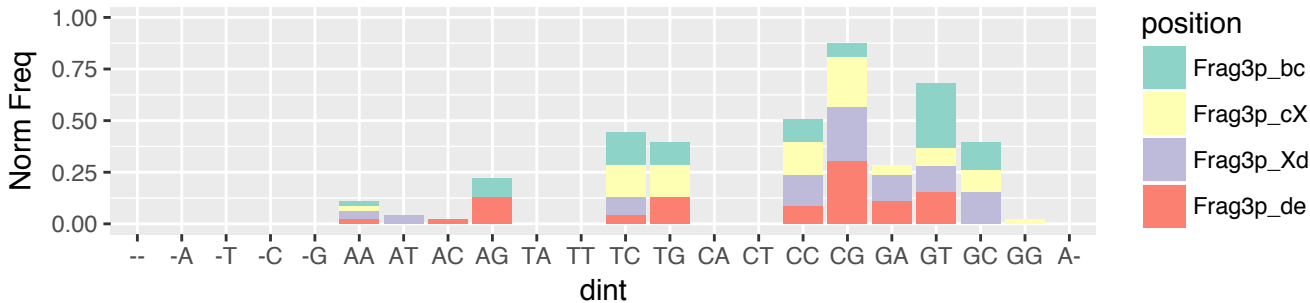

BRCA (n=1061)  
 i-tRF & exclusive (n=217)  
 3' terminus relative to 3' stem of T-loop (n=45)

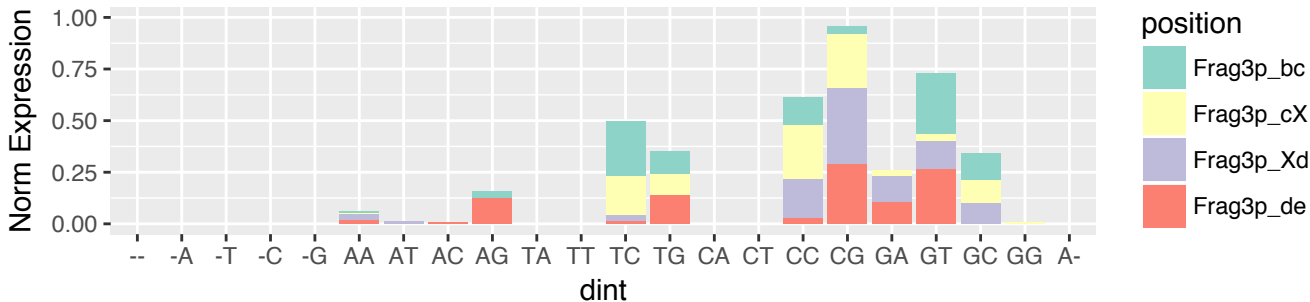

BRCA (n=1061)  
i-tRF & exclusive (n=217)  
3' terminus relative to 3' end of the tRNA (n=18)

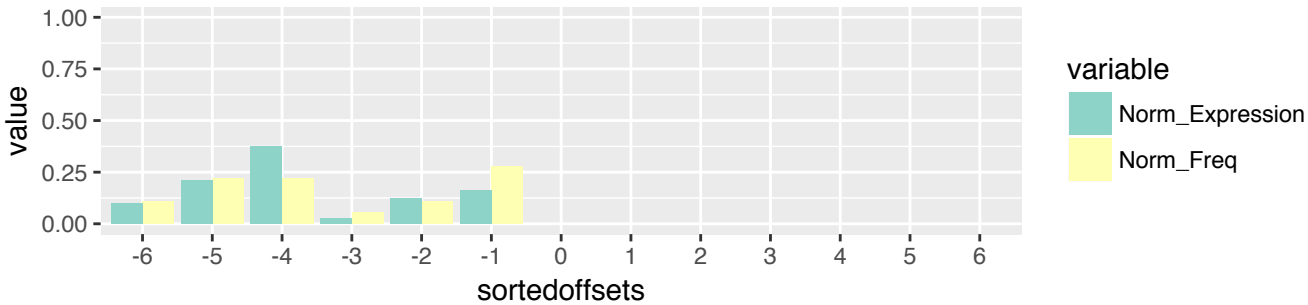

BRCA (n=1061)  
i-tRF & exclusive (n=217)  
3' terminus relative to 3' end of the tRNA (n=18)

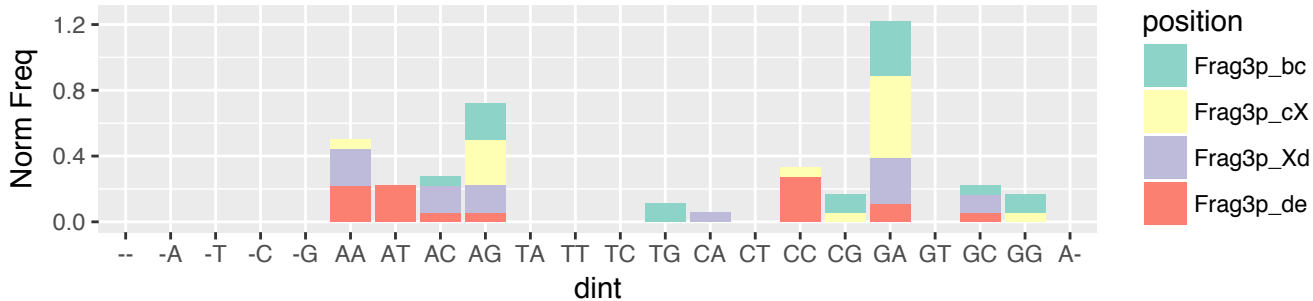

BRCA (n=1061)  
i-tRF & exclusive (n=217)  
3' terminus relative to 3' end of the tRNA (n=18)

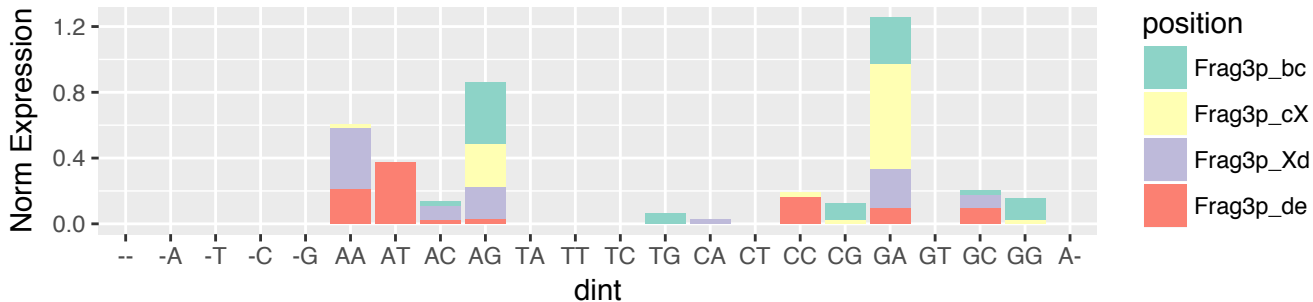



BRCA (n=1061)  
 3'-tRF & exclusive (n=181)  
 5' terminus relative to 5' stem of T-loop (n=126)

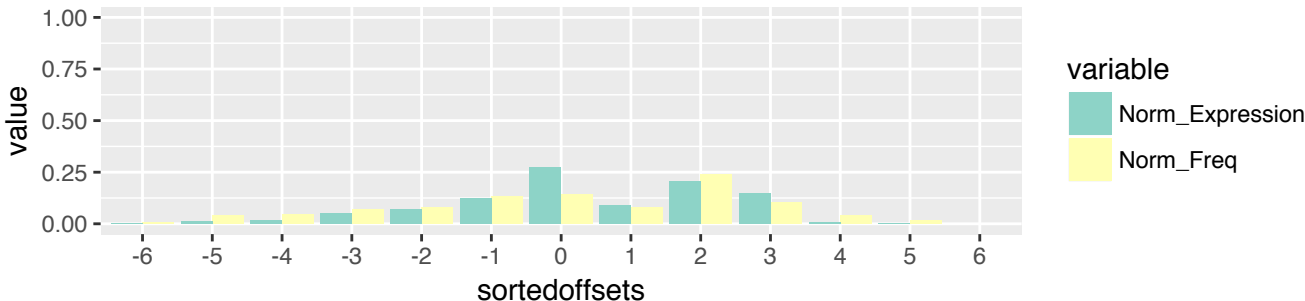

BRCA (n=1061)  
 3'-tRF & exclusive (n=181)  
 5' terminus relative to 5' stem of T-loop (n=126)

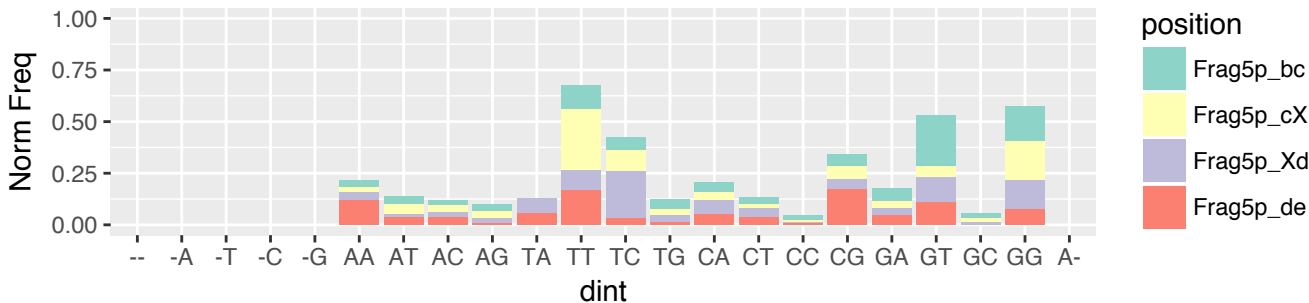

BRCA (n=1061)  
 3'-tRF & exclusive (n=181)  
 5' terminus relative to 5' stem of T-loop (n=126)

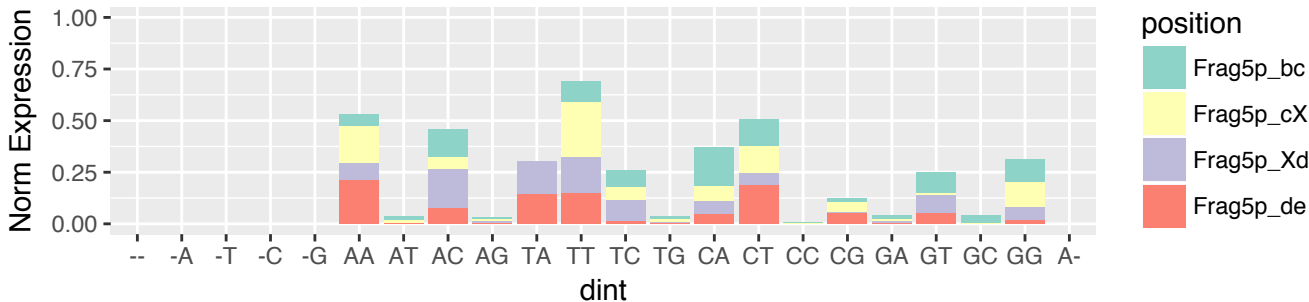

BRCA (n=1061)  
 3'-tRF & exclusive (n=181)  
 5' terminus relative to 3' stem of T-loop (n=56)

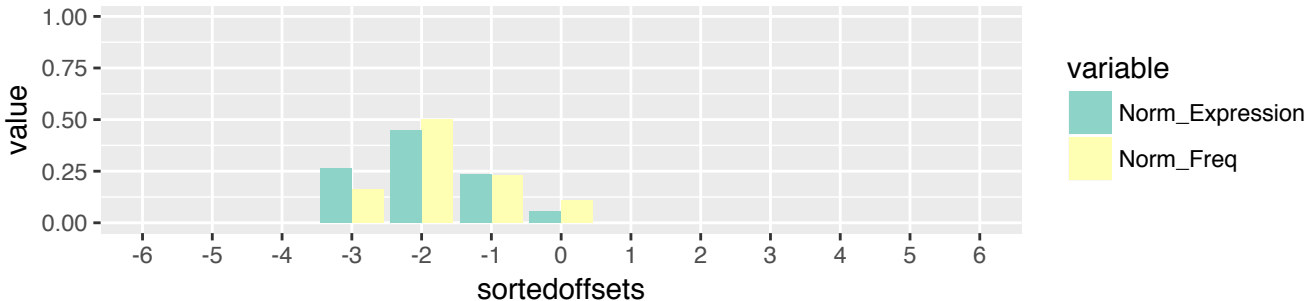

BRCA (n=1061)  
 3'-tRF & exclusive (n=181)  
 5' terminus relative to 3' stem of T-loop (n=56)

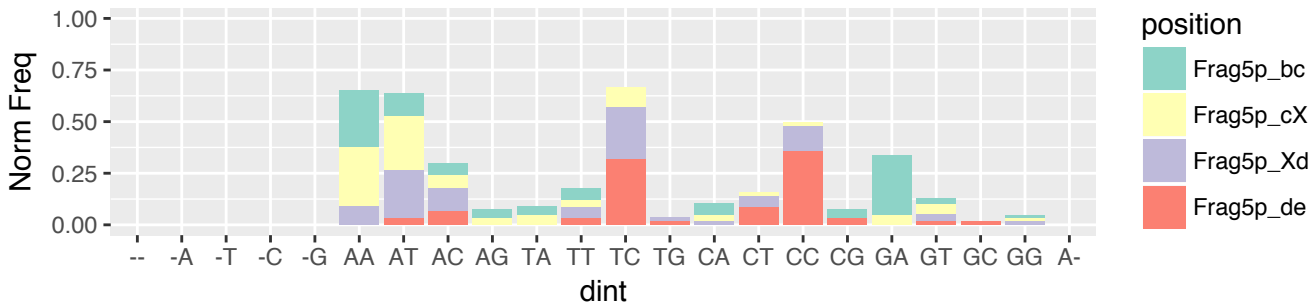

BRCA (n=1061)  
 3'-tRF & exclusive (n=181)  
 5' terminus relative to 3' stem of T-loop (n=56)

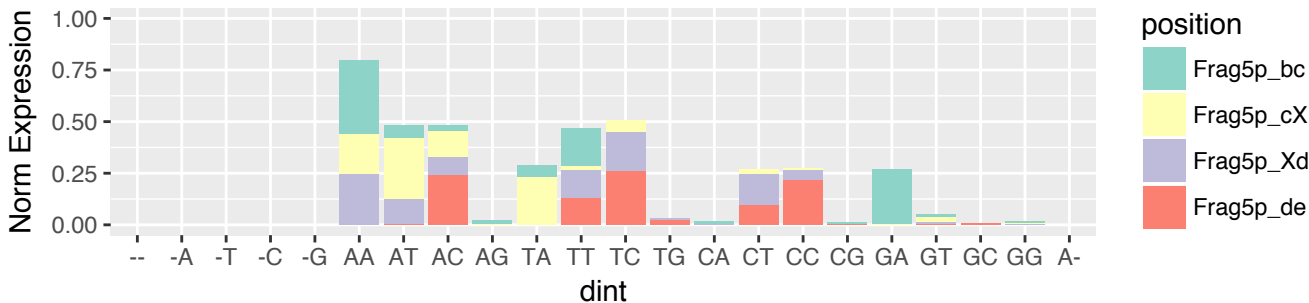

BRCA (n=1061)  
 3'-tRF & exclusive (n=181)  
 3' terminus relative to 3' end of the tRNA (n=181)

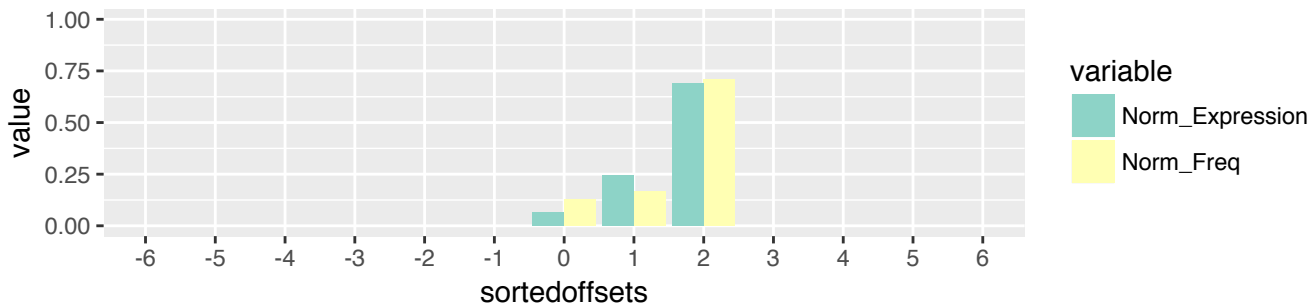

BRCA (n=1061)  
 3'-tRF & exclusive (n=181)  
 3' terminus relative to 3' end of the tRNA (n=181)

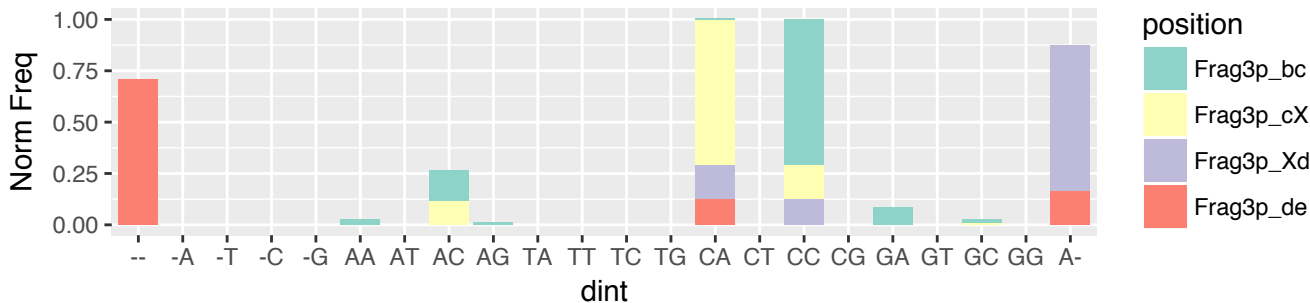

BRCA (n=1061)  
 3'-tRF & exclusive (n=181)  
 3' terminus relative to 3' end of the tRNA (n=181)

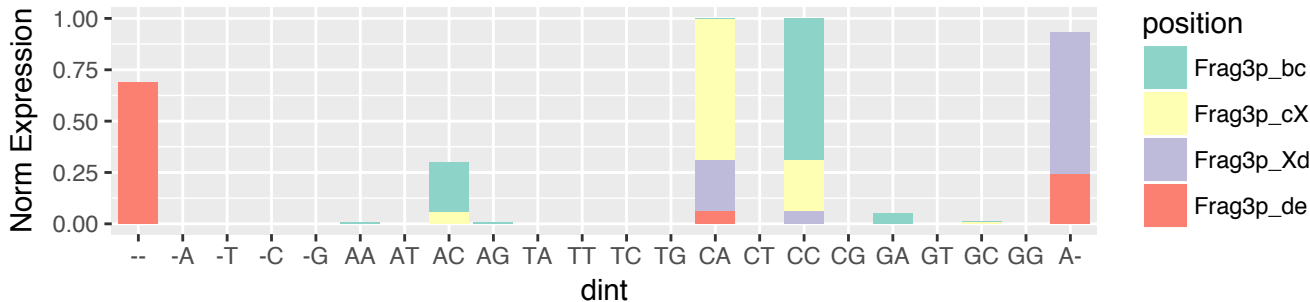

CESC (n=1089)  
 5'-half & exclusive (n=5)  
 5' terminus relative to 5' end of the tRNA (n=5)

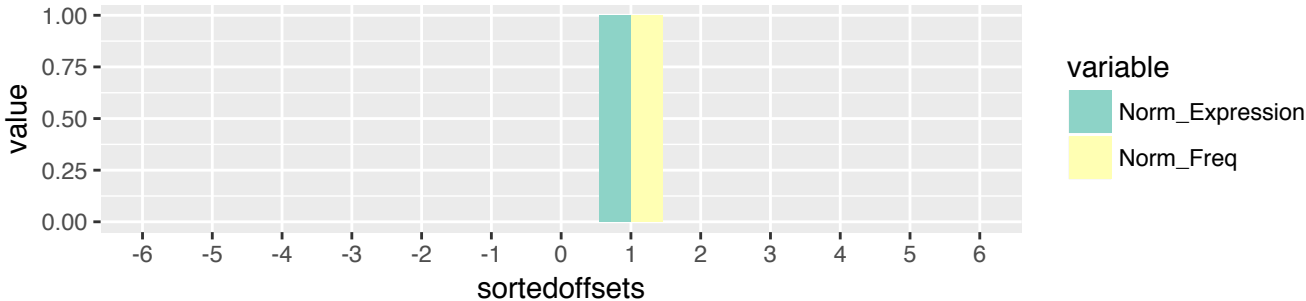

CESC (n=1089)  
 5'-half & exclusive (n=5)  
 5' terminus relative to 5' end of the tRNA (n=5)

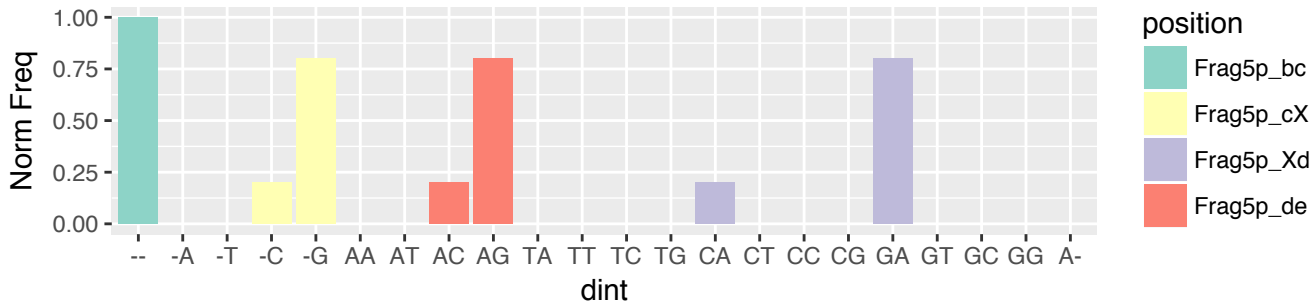

CESC (n=1089)  
 5'-half & exclusive (n=5)  
 5' terminus relative to 5' end of the tRNA (n=5)

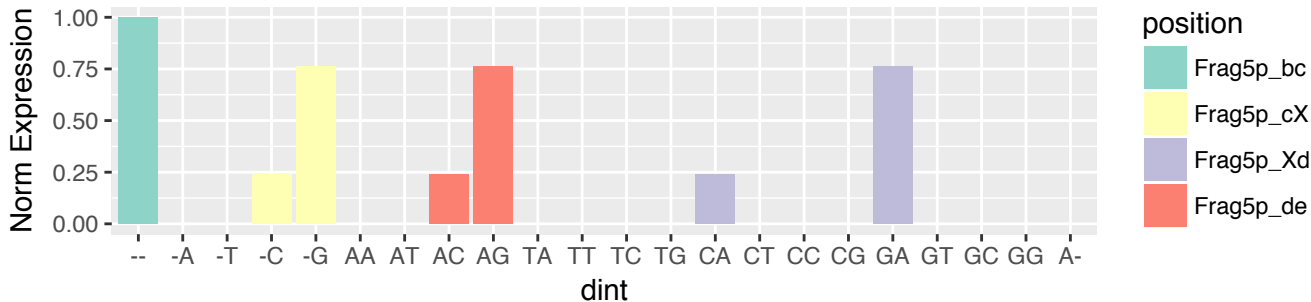

CESC (n=1089)  
 5'-half & exclusive (n=5)  
 3' terminus relative to 5' stem of A-loop (n=5)

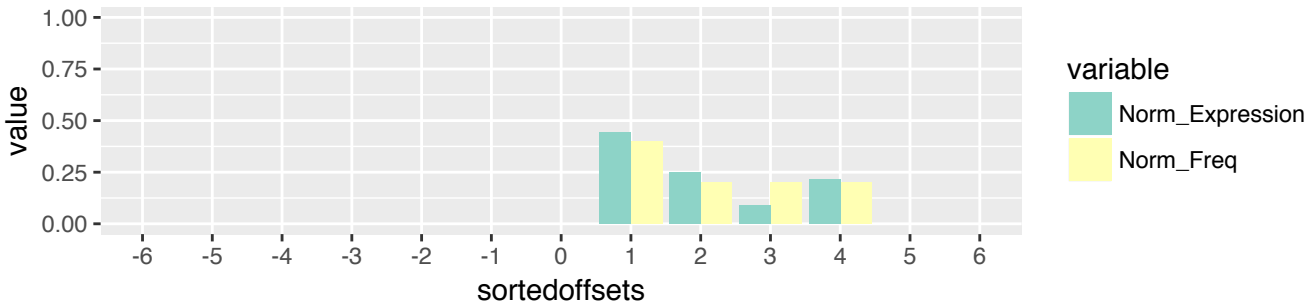

CESC (n=1089)  
 5'-half & exclusive (n=5)  
 3' terminus relative to 5' stem of A-loop (n=5)



CESC (n=1089)  
 5'-half & exclusive (n=5)  
 3' terminus relative to 5' stem of A-loop (n=5)

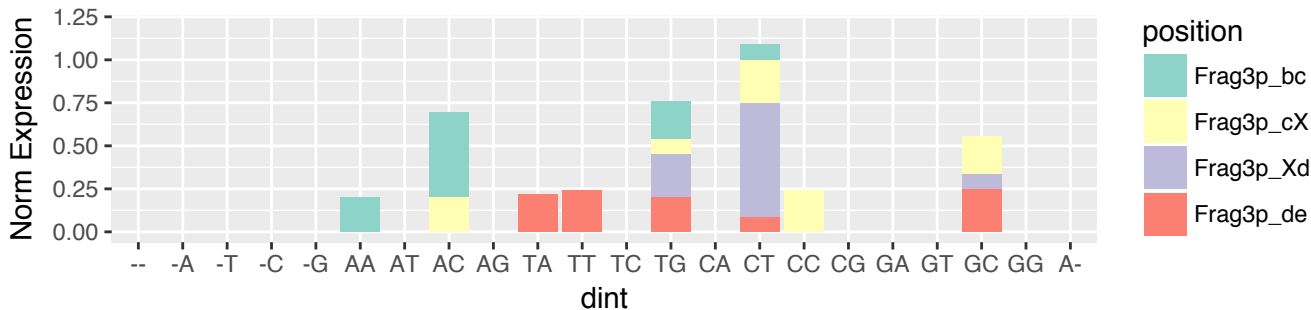

CESC (n=1089)  
 5'-tRF & exclusive (n=163)  
 5' terminus relative to 5' end of the tRNA (n=163)

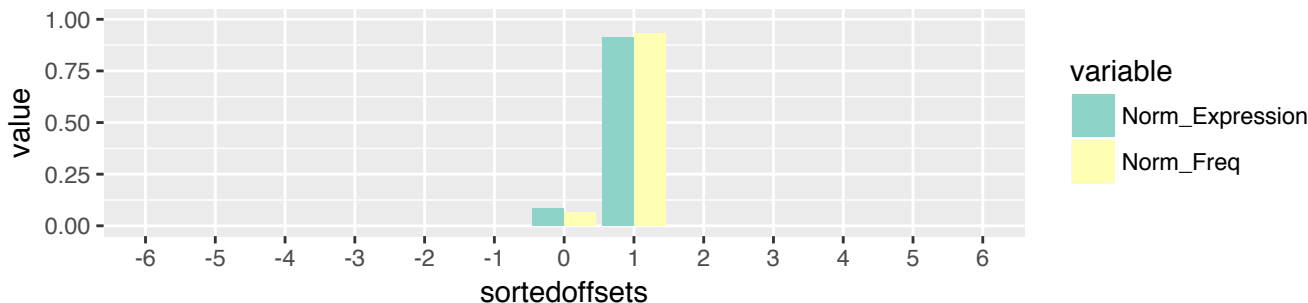

CESC (n=1089)  
 5'-tRF & exclusive (n=163)  
 5' terminus relative to 5' end of the tRNA (n=163)

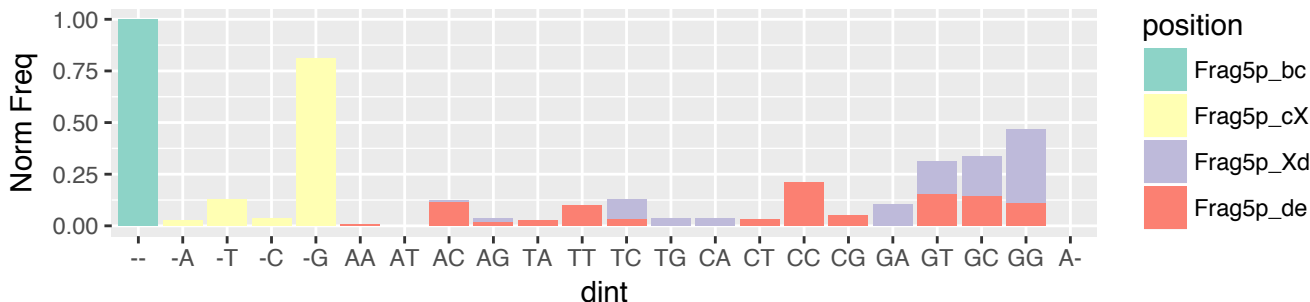

CESC (n=1089)  
 5'-tRF & exclusive (n=163)  
 5' terminus relative to 5' end of the tRNA (n=163)

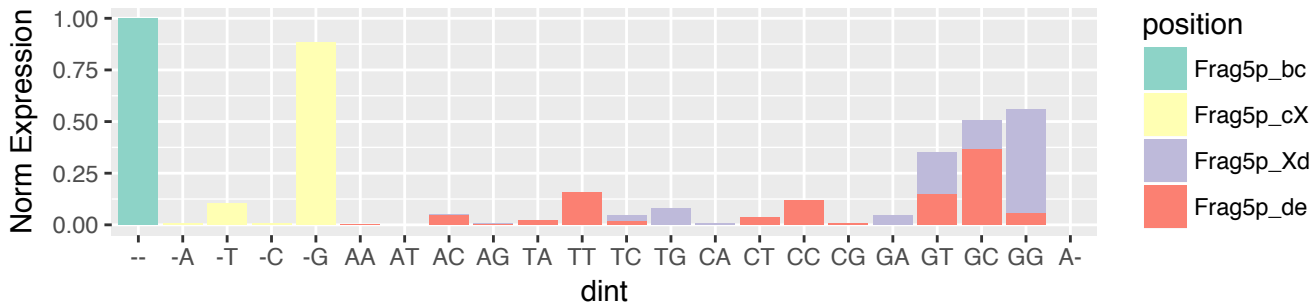

CESC (n=1089)  
 5'-tRF & exclusive (n=163)  
 3' terminus relative to 5' stem of D-loop (n=8)

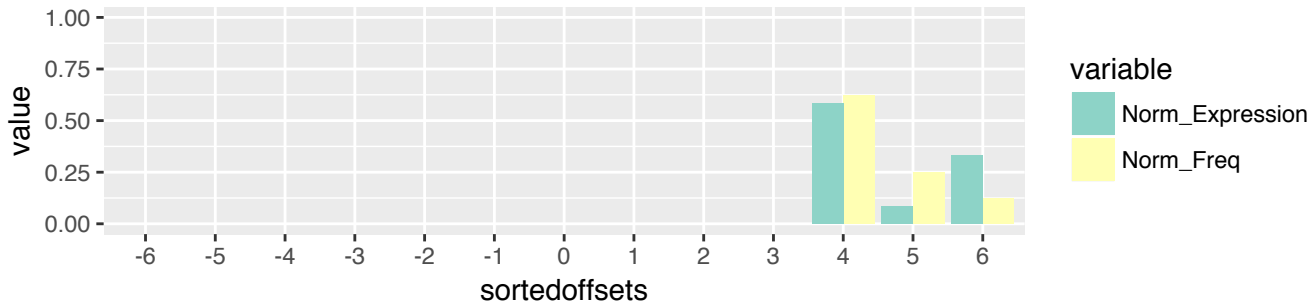

CESC (n=1089)  
 5'-tRF & exclusive (n=163)  
 3' terminus relative to 5' stem of D-loop (n=8)

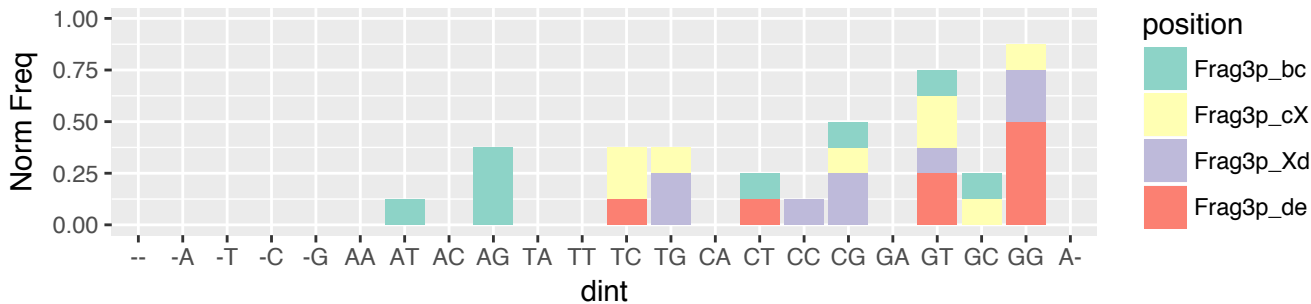

CESC (n=1089)  
 5'-tRF & exclusive (n=163)  
 3' terminus relative to 5' stem of D-loop (n=8)

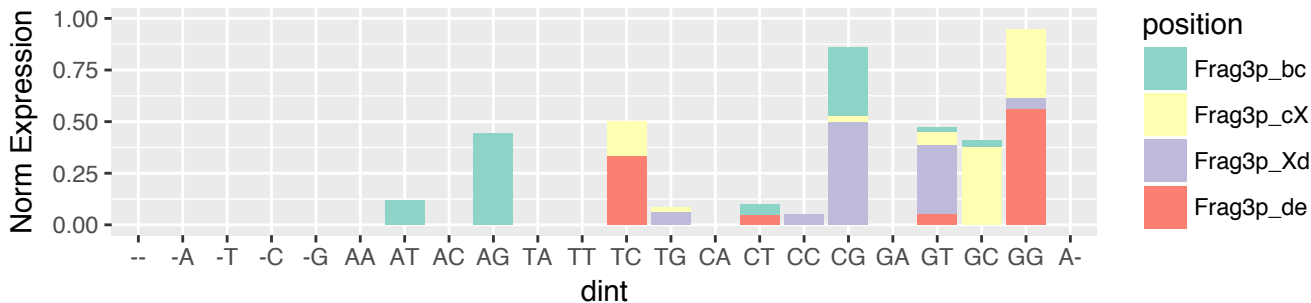

CESC (n=1089)  
 5'-tRF & exclusive (n=163)  
 3' terminus relative to 3' stem of D-loop (n=145)

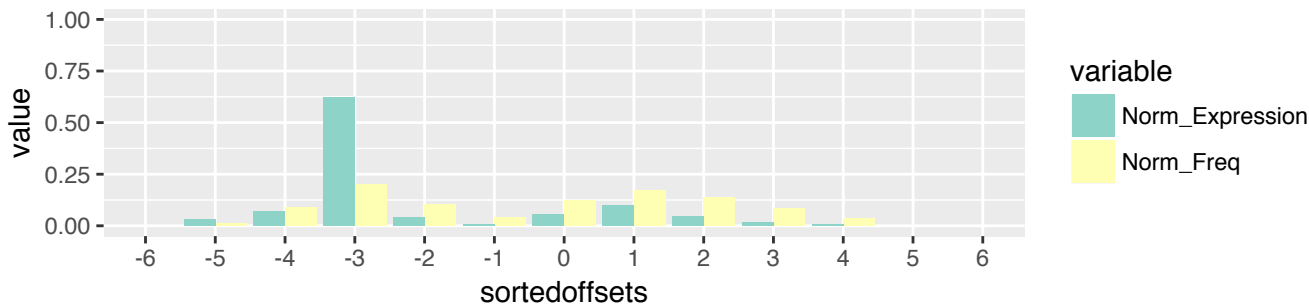

CESC (n=1089)  
 5'-tRF & exclusive (n=163)  
 3' terminus relative to 3' stem of D-loop (n=145)

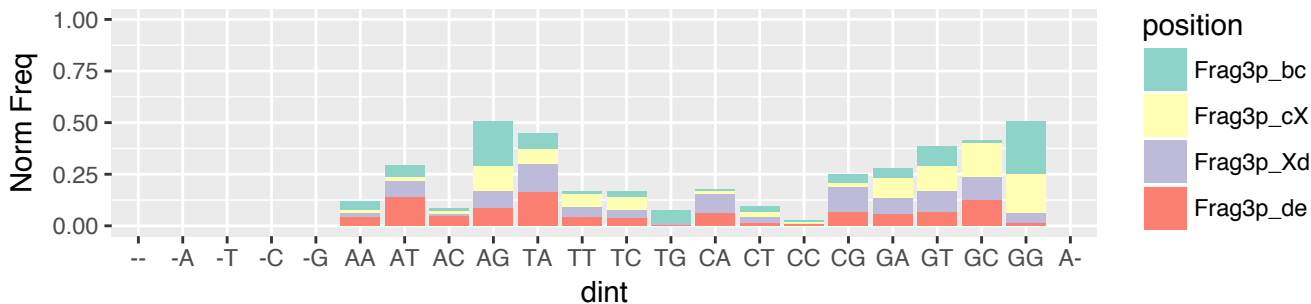

CESC (n=1089)  
 5'-tRF & exclusive (n=163)  
 3' terminus relative to 3' stem of D-loop (n=145)

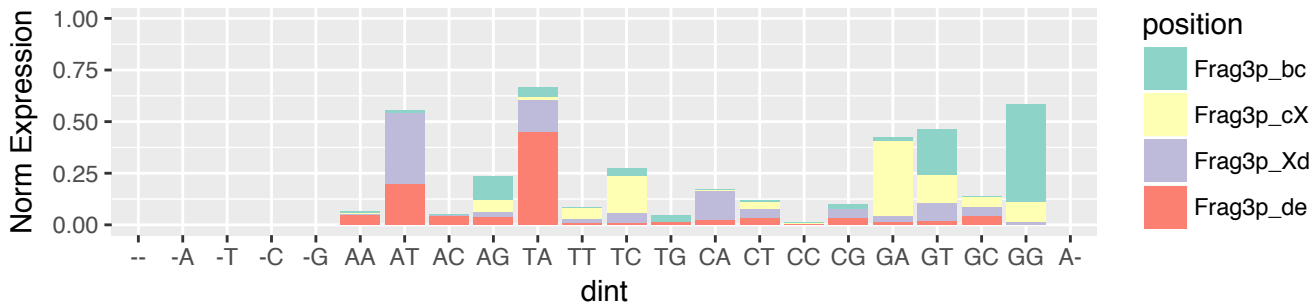



CESC (n=1089)  
 5'-tRF & exclusive (n=163)  
 3' terminus relative to 5' stem of A-loop (n=7)

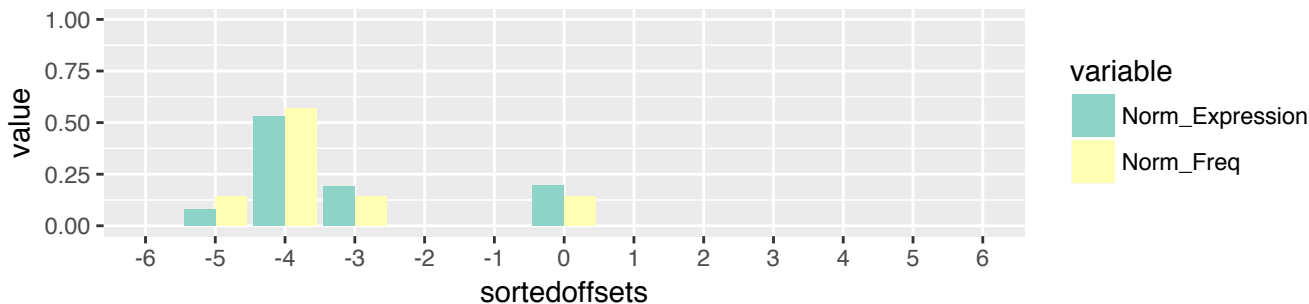

CESC (n=1089)  
 5'-tRF & exclusive (n=163)  
 3' terminus relative to 5' stem of A-loop (n=7)

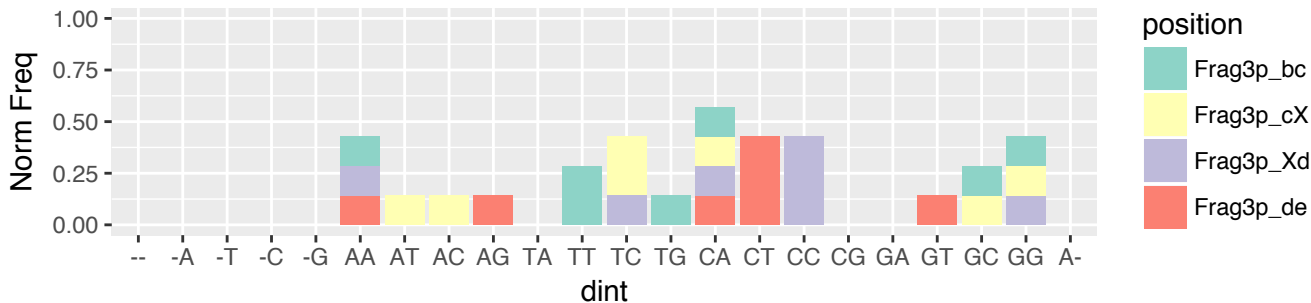

CESC (n=1089)  
 5'-tRF & exclusive (n=163)  
 3' terminus relative to 5' stem of A-loop (n=7)

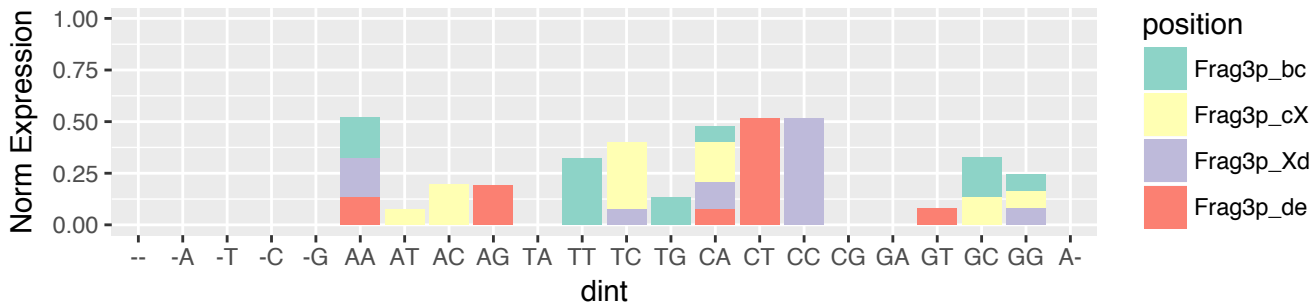

CESC (n=1089)  
 5'-tRF & exclusive (n=163)  
 3' terminus relative to 3' stem of A-loop (n=3)

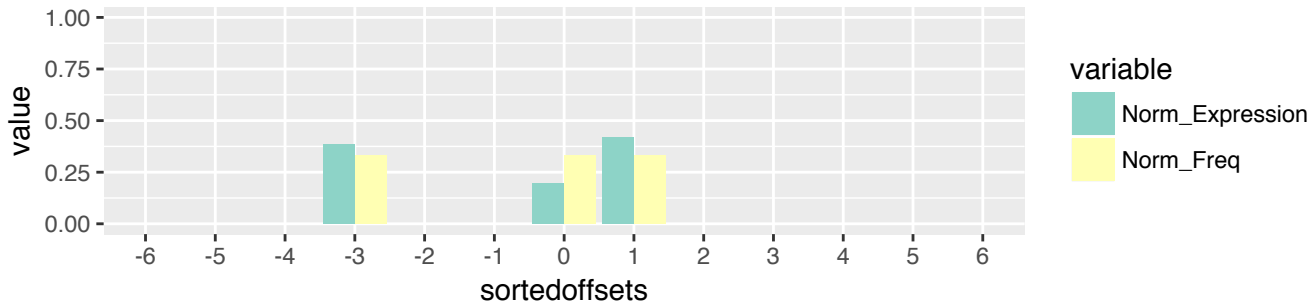

CESC (n=1089)  
 5'-tRF & exclusive (n=163)  
 3' terminus relative to 3' stem of A-loop (n=3)

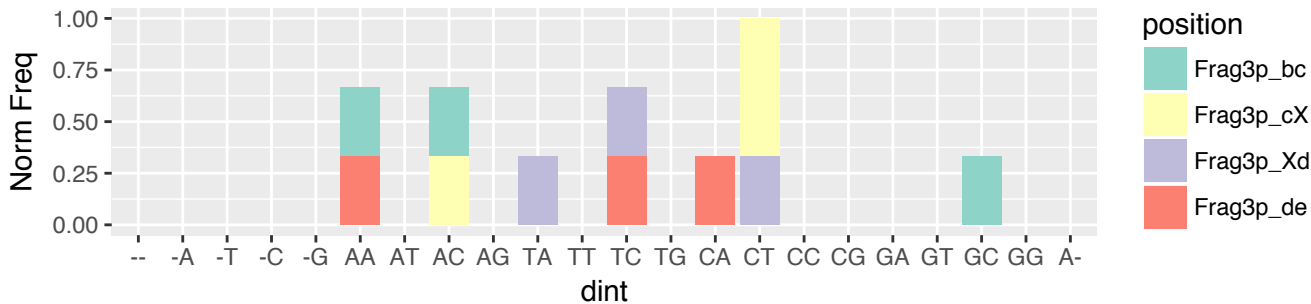

CESC (n=1089)  
 5'-tRF & exclusive (n=163)  
 3' terminus relative to 3' stem of A-loop (n=3)

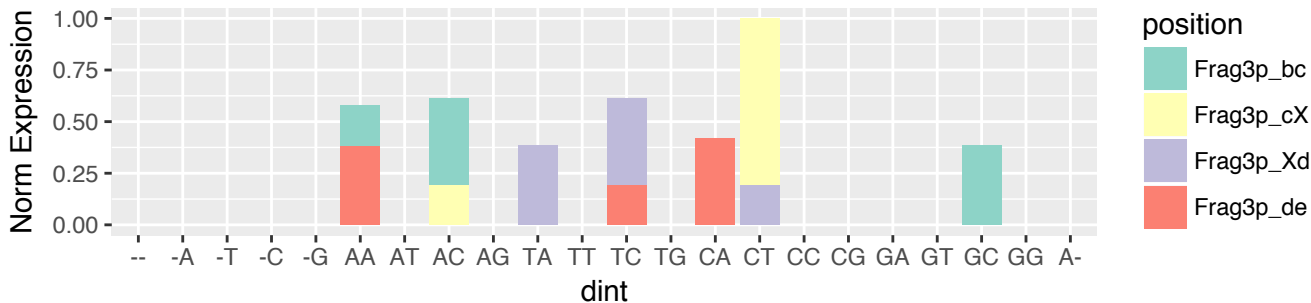

CESC (n=1089)  
 i-tRF & exclusive (n=246)  
 5' terminus relative to 5' end of the tRNA (n=5)

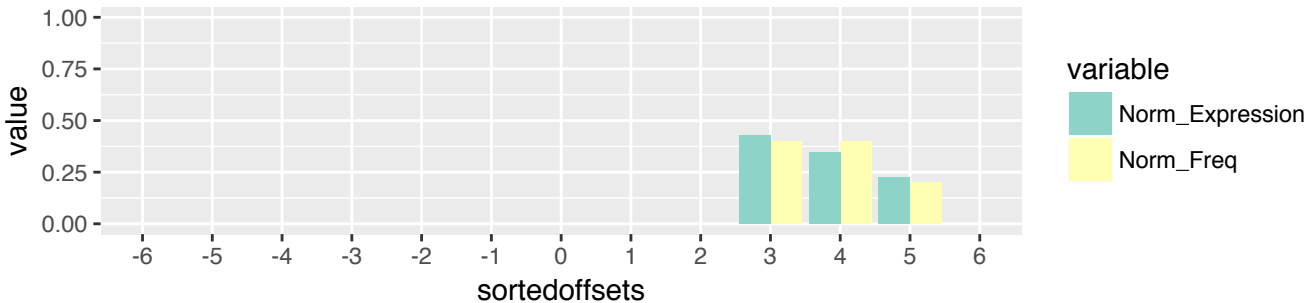

CESC (n=1089)  
 i-tRF & exclusive (n=246)  
 5' terminus relative to 5' end of the tRNA (n=5)

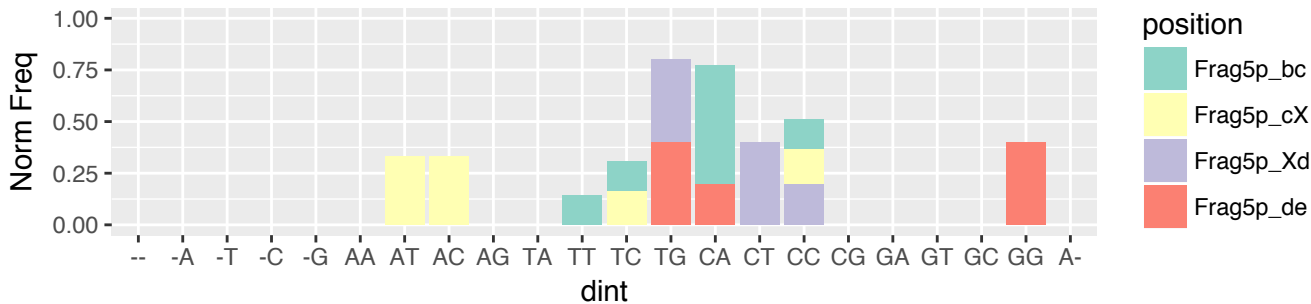

CESC (n=1089)  
 i-tRF & exclusive (n=246)  
 5' terminus relative to 5' end of the tRNA (n=5)

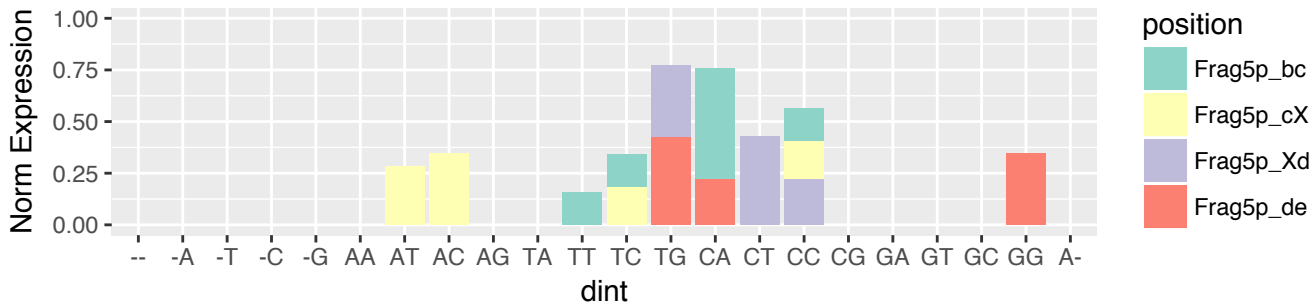

CESC (n=1089)  
 i-tRF & exclusive (n=246)  
 5' terminus relative to 5' stem of D-loop (n=89)

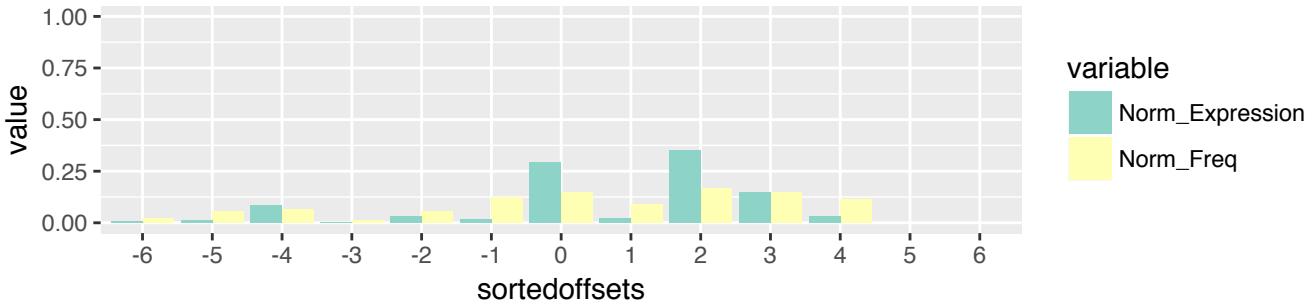

CESC (n=1089)  
 i-tRF & exclusive (n=246)  
 5' terminus relative to 5' stem of D-loop (n=89)

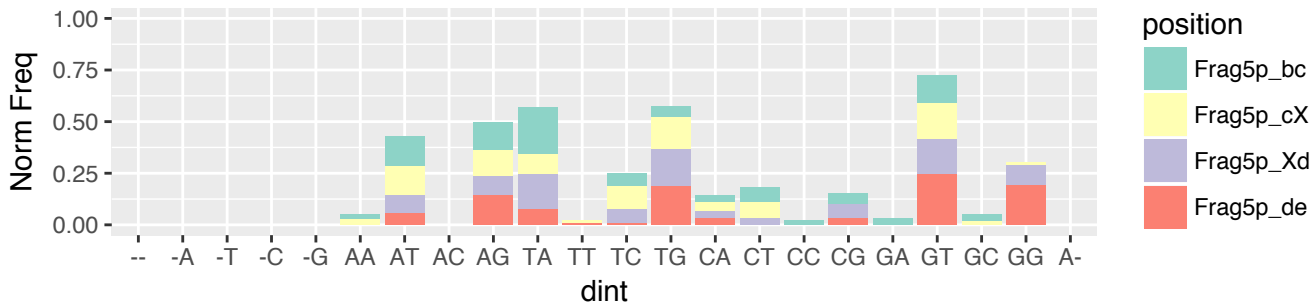

CESC (n=1089)  
 i-tRF & exclusive (n=246)  
 5' terminus relative to 5' stem of D-loop (n=89)

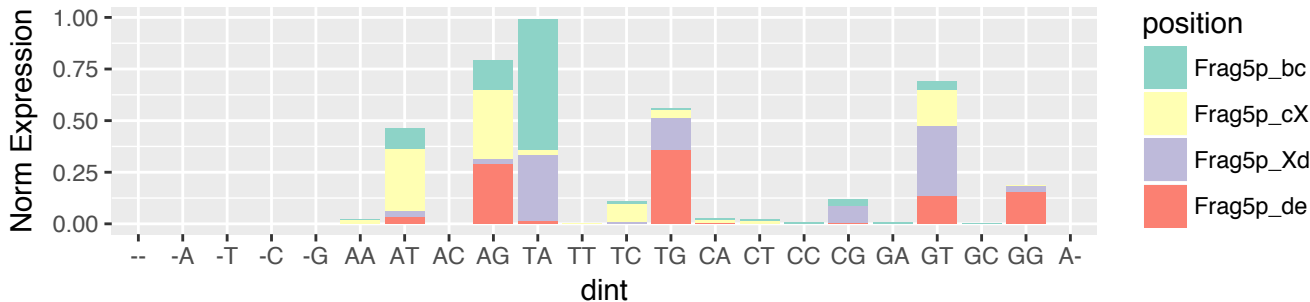

CESC (n=1089)  
i-tRF & exclusive (n=246)  
5' terminus relative to 3' stem of D-loop (n=6)

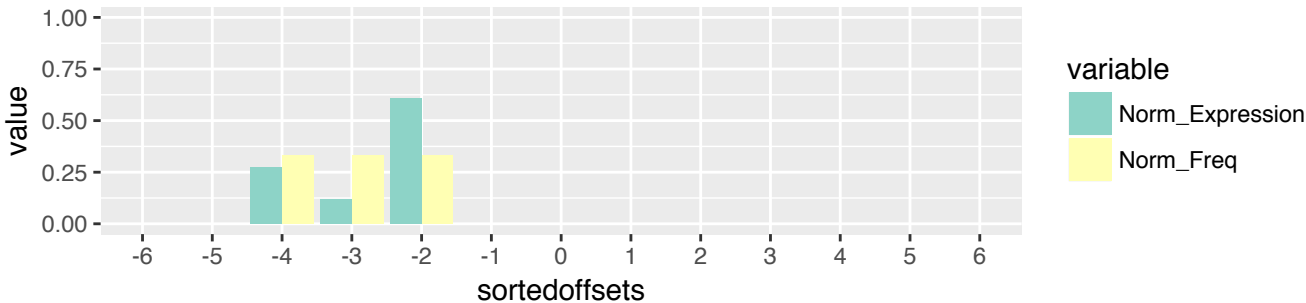

CESC (n=1089)  
i-tRF & exclusive (n=246)  
5' terminus relative to 3' stem of D-loop (n=6)

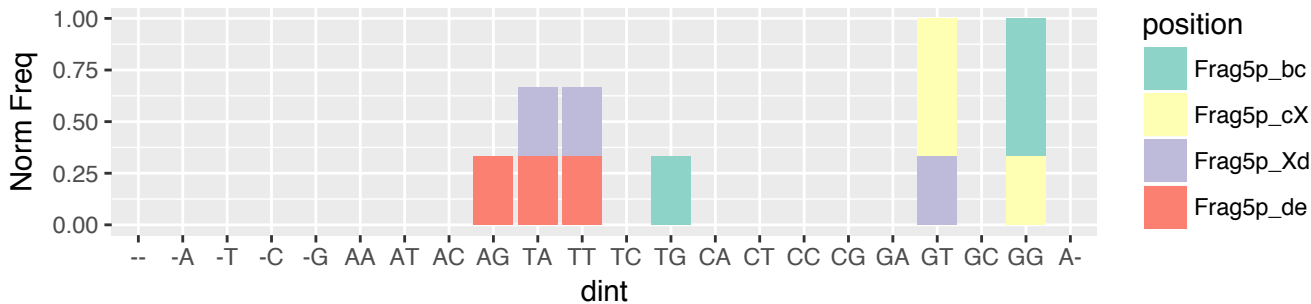

CESC (n=1089)  
i-tRF & exclusive (n=246)  
5' terminus relative to 3' stem of D-loop (n=6)

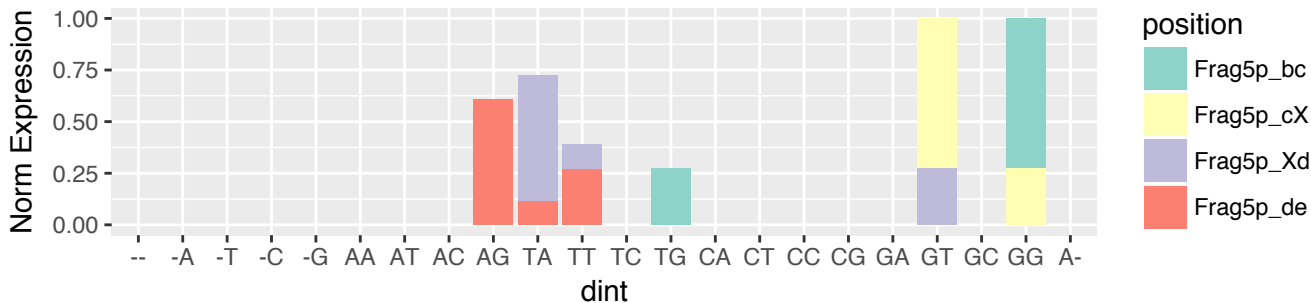

CESC (n=1089)  
 i-tRF & exclusive (n=246)  
 5' terminus relative to 5' stem of A-loop (n=55)

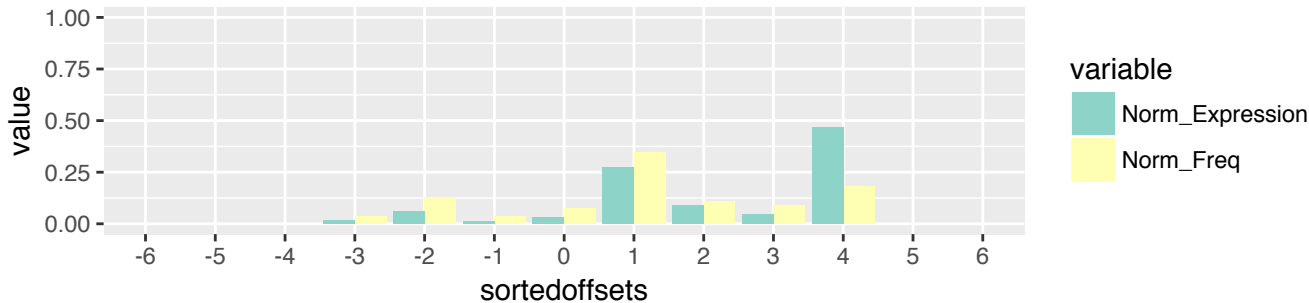

CESC (n=1089)  
 i-tRF & exclusive (n=246)  
 5' terminus relative to 5' stem of A-loop (n=55)

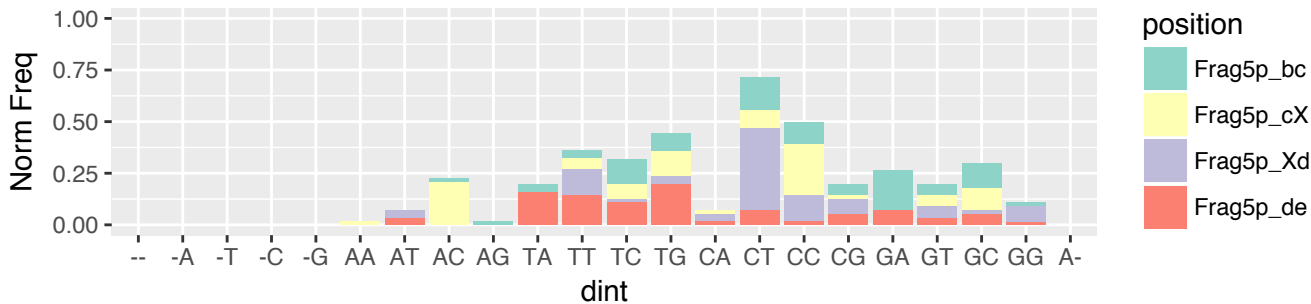

CESC (n=1089)  
 i-tRF & exclusive (n=246)  
 5' terminus relative to 5' stem of A-loop (n=55)

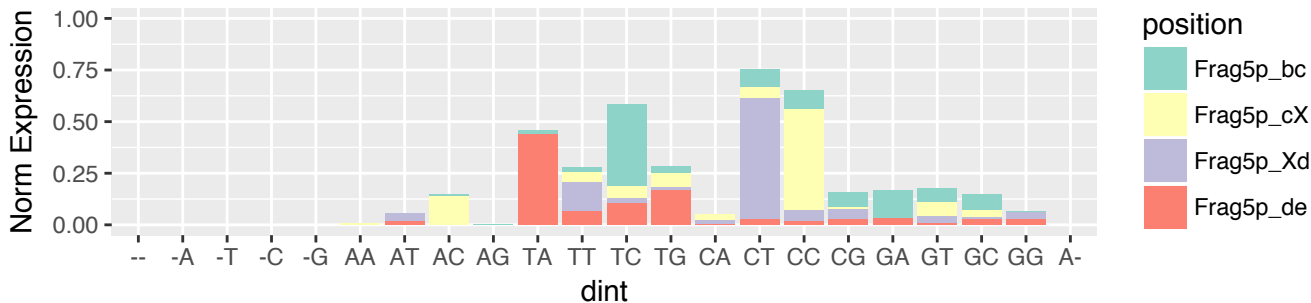

CESC (n=1089)  
i-tRF & exclusive (n=246)  
5' terminus relative to 3' stem of A-loop (n=62)

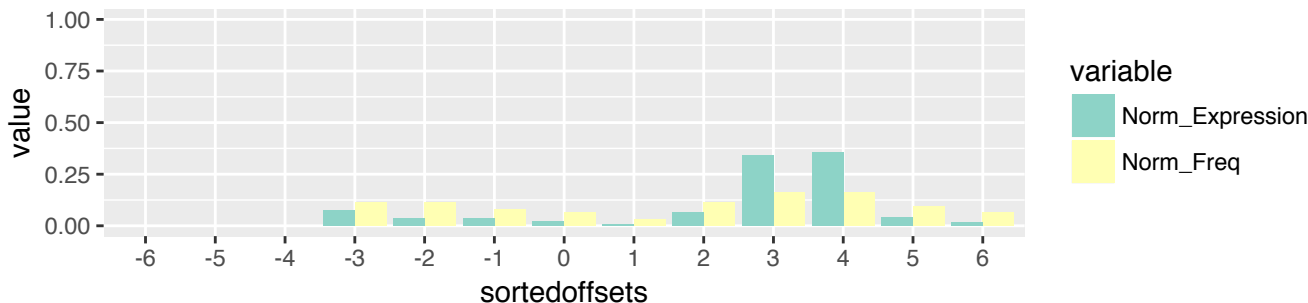

CESC (n=1089)  
i-tRF & exclusive (n=246)  
5' terminus relative to 3' stem of A-loop (n=62)

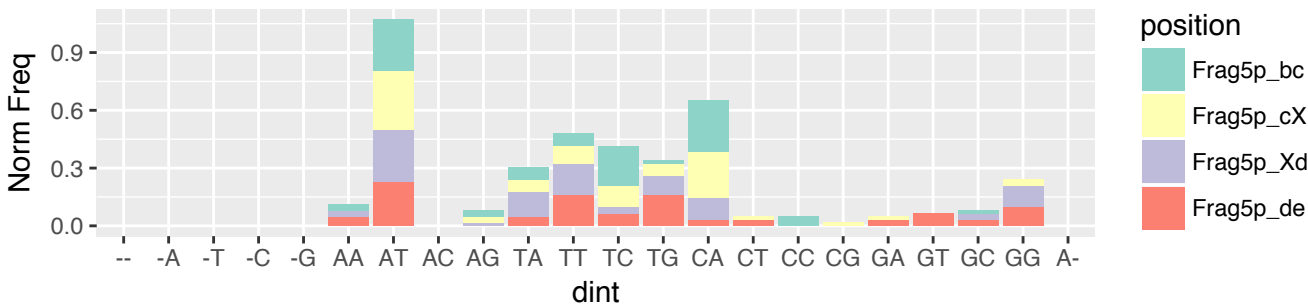

CESC (n=1089)  
i-tRF & exclusive (n=246)  
5' terminus relative to 3' stem of A-loop (n=62)

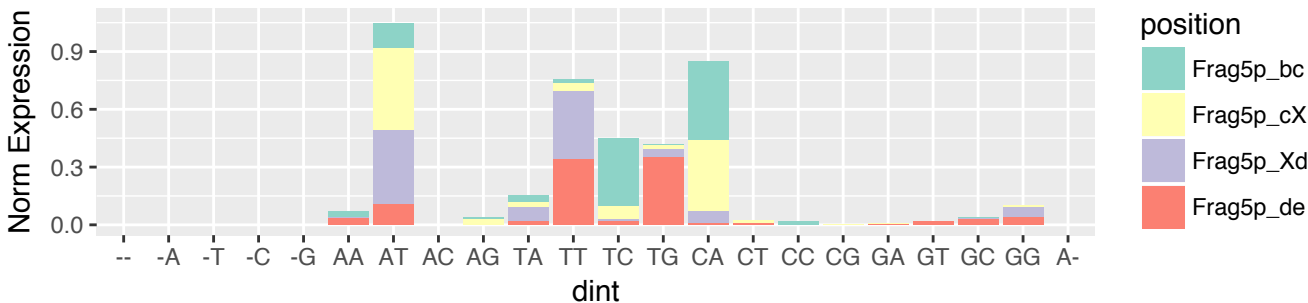

CESC (n=1089)  
i-tRF & exclusive (n=246)  
5' terminus relative to 5' stem of T-loop (n=29)

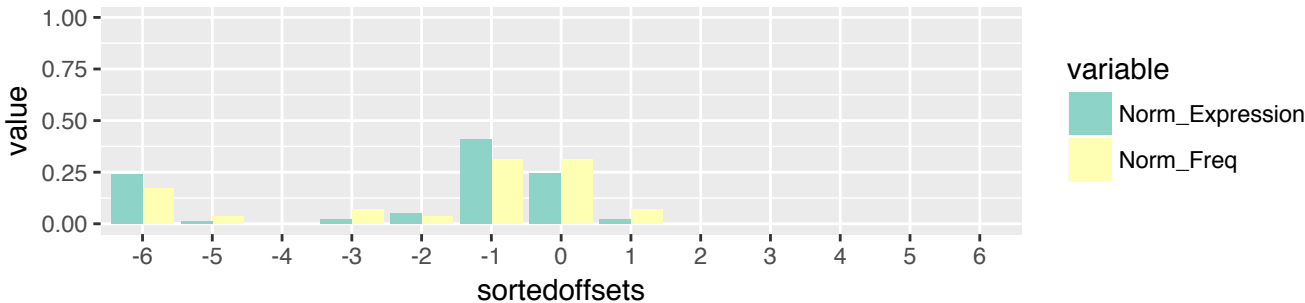

CESC (n=1089)  
i-tRF & exclusive (n=246)  
5' terminus relative to 5' stem of T-loop (n=29)

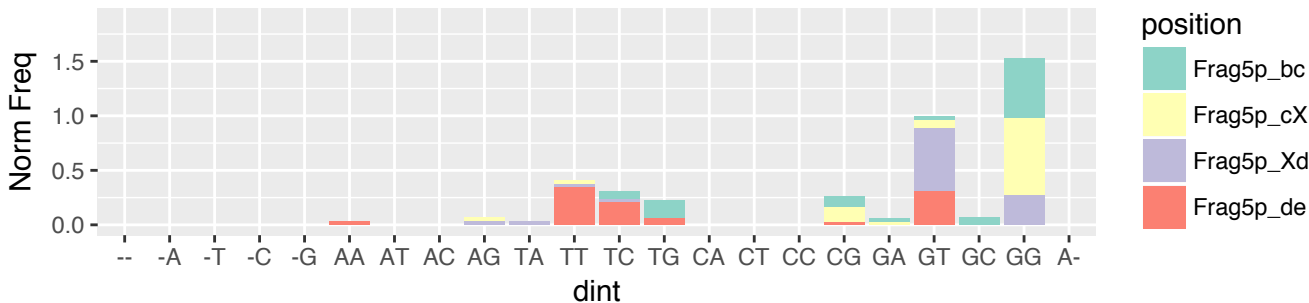

CESC (n=1089)  
i-tRF & exclusive (n=246)  
5' terminus relative to 5' stem of T-loop (n=29)

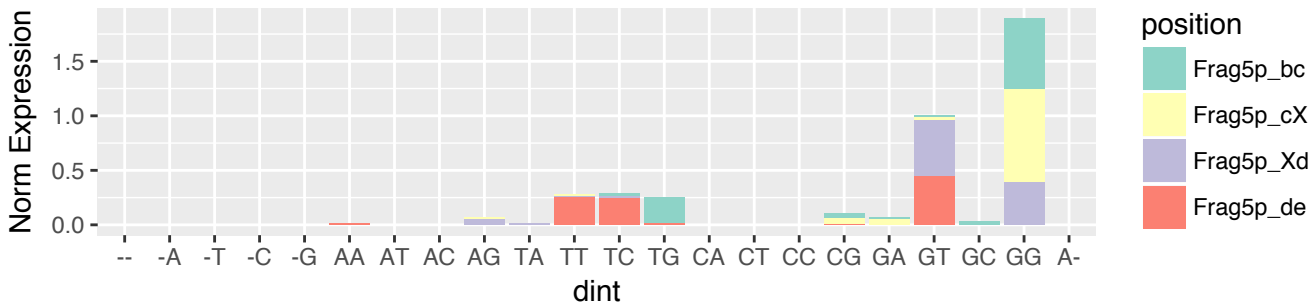



CESC (n=1089)  
i-tRF & exclusive (n=246)  
3' terminus relative to 5' stem of A-loop (n=80)

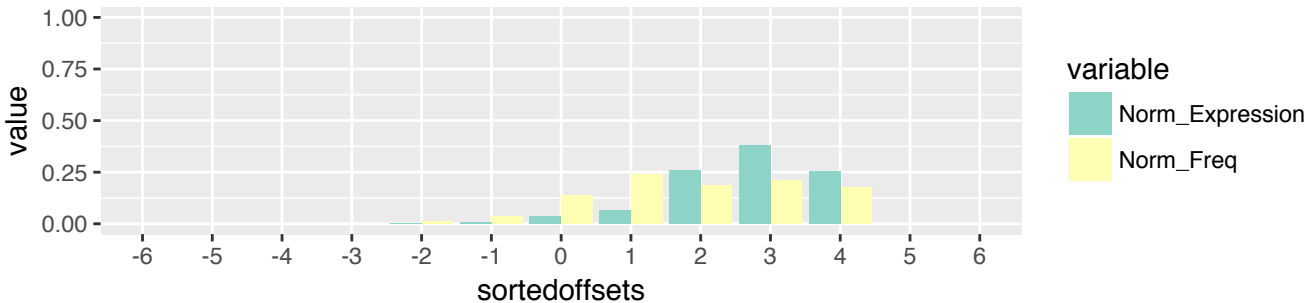

CESC (n=1089)  
i-tRF & exclusive (n=246)  
3' terminus relative to 5' stem of A-loop (n=80)

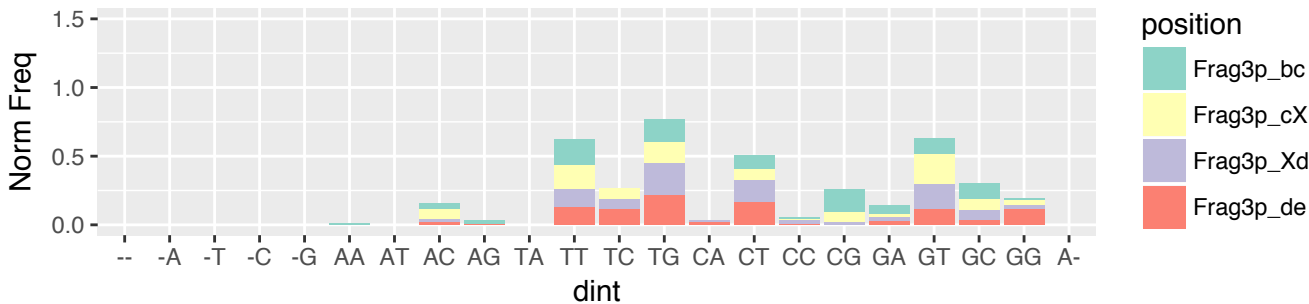

CESC (n=1089)  
i-tRF & exclusive (n=246)  
3' terminus relative to 5' stem of A-loop (n=80)

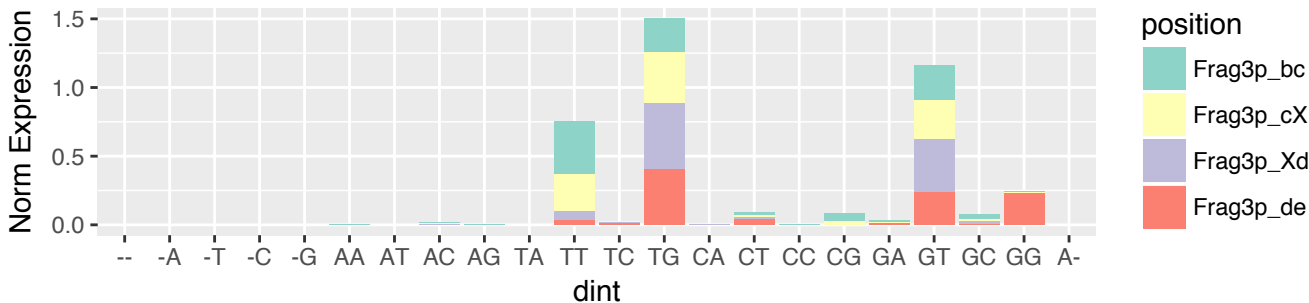

CESC (n=1089)  
i-tRF & exclusive (n=246)  
3' terminus relative to 3' stem of A-loop (n=26)

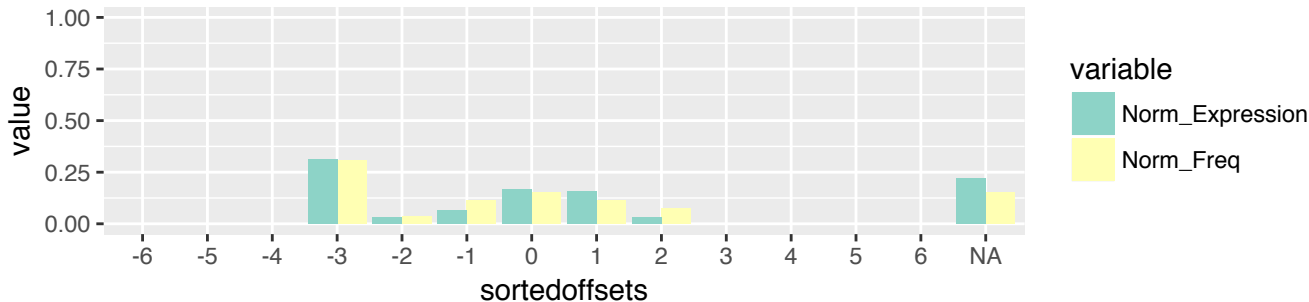

CESC (n=1089)  
i-tRF & exclusive (n=246)  
3' terminus relative to 3' stem of A-loop (n=26)

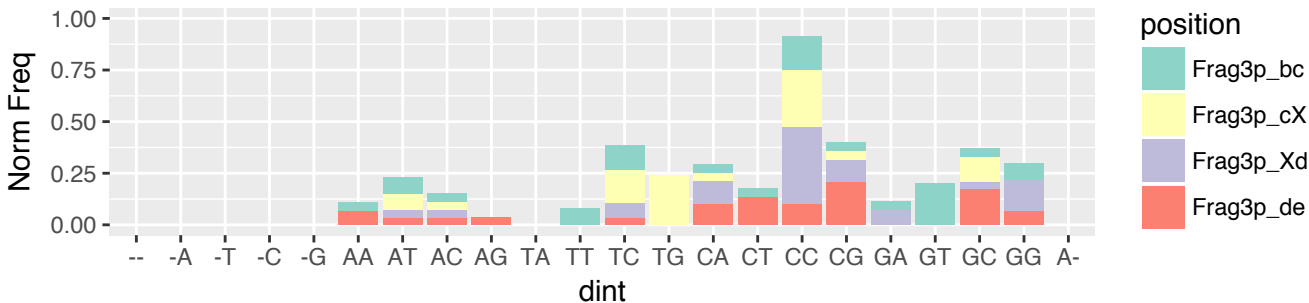

CESC (n=1089)  
i-tRF & exclusive (n=246)  
3' terminus relative to 3' stem of A-loop (n=26)

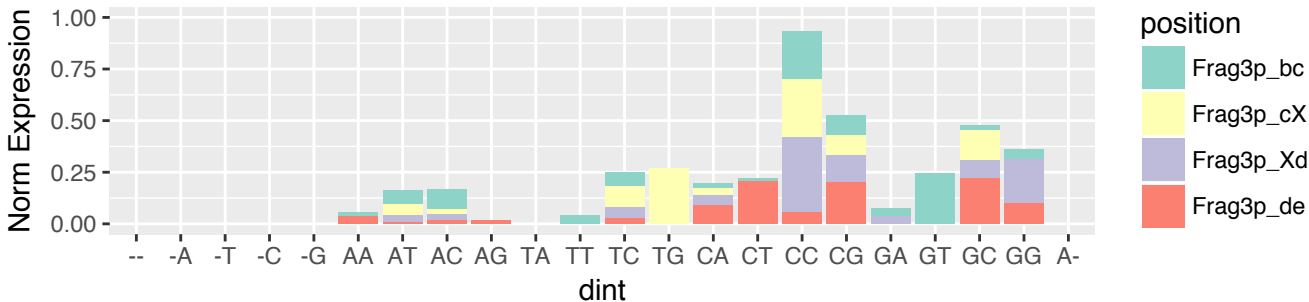

CESC (n=1089)  
i-tRF & exclusive (n=246)  
3' terminus relative to 5' stem of T-loop (n=58)

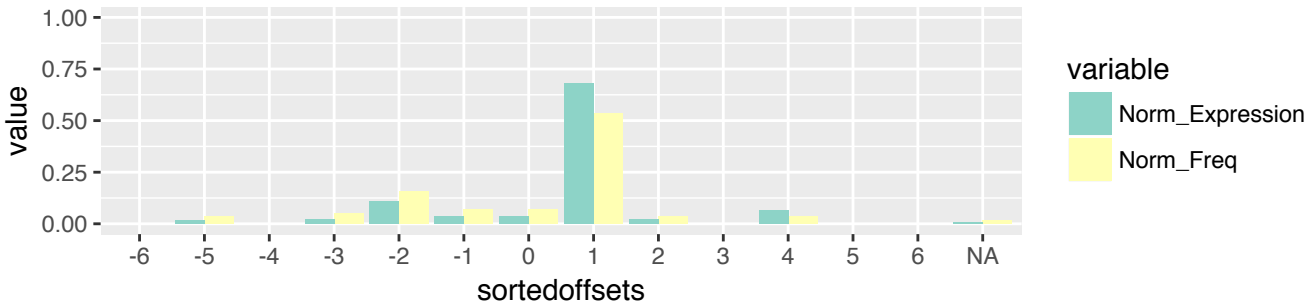

CESC (n=1089)  
i-tRF & exclusive (n=246)  
3' terminus relative to 5' stem of T-loop (n=58)

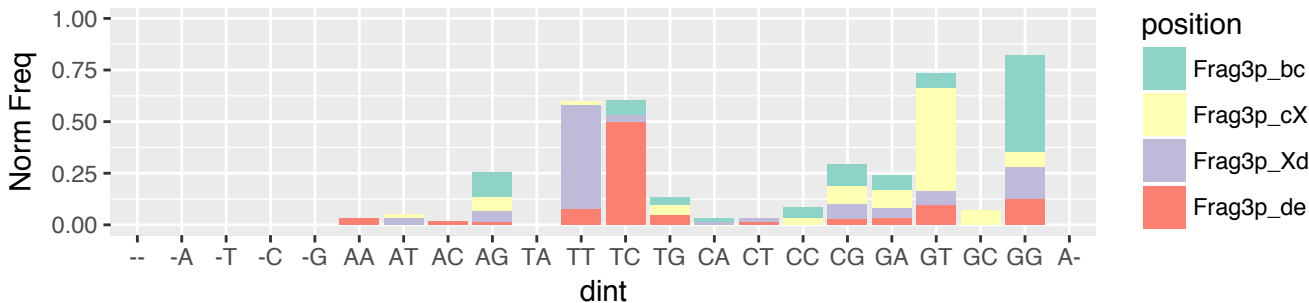

CESC (n=1089)  
i-tRF & exclusive (n=246)  
3' terminus relative to 5' stem of T-loop (n=58)

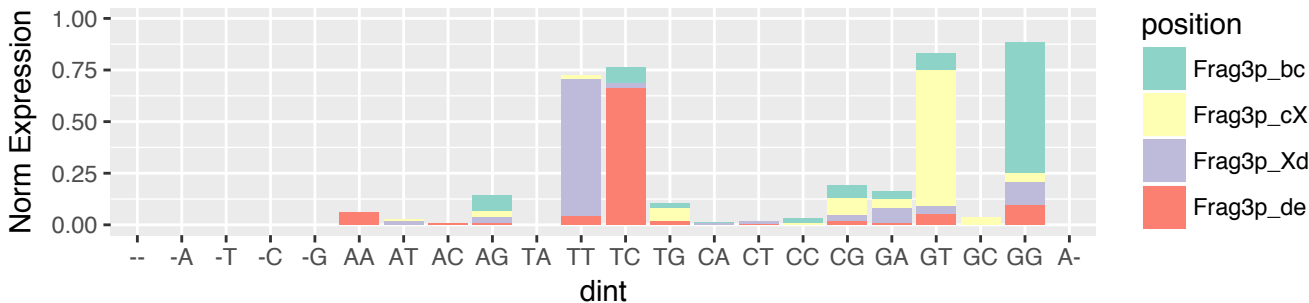

CESC (n=1089)  
i-tRF & exclusive (n=246)  
3' terminus relative to 3' stem of T-loop (n=49)

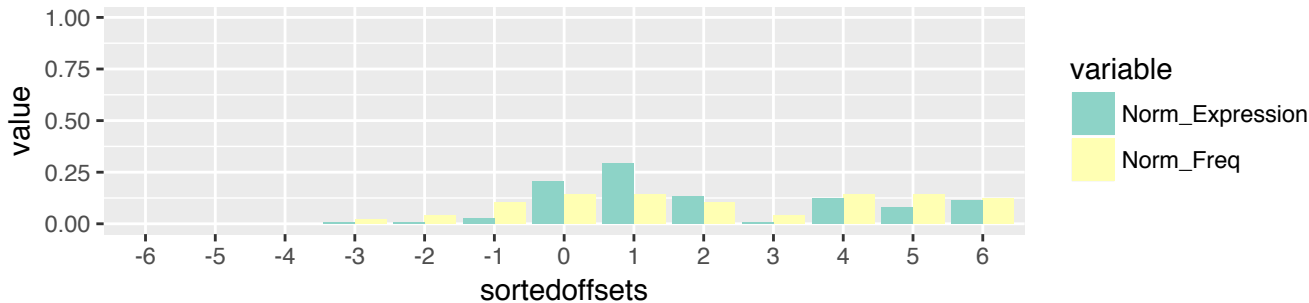

CESC (n=1089)  
i-tRF & exclusive (n=246)  
3' terminus relative to 3' stem of T-loop (n=49)

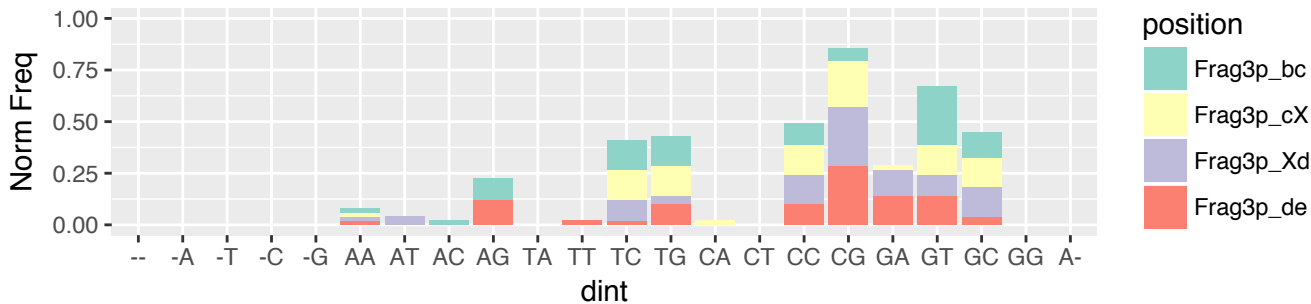

CESC (n=1089)  
i-tRF & exclusive (n=246)  
3' terminus relative to 3' stem of T-loop (n=49)

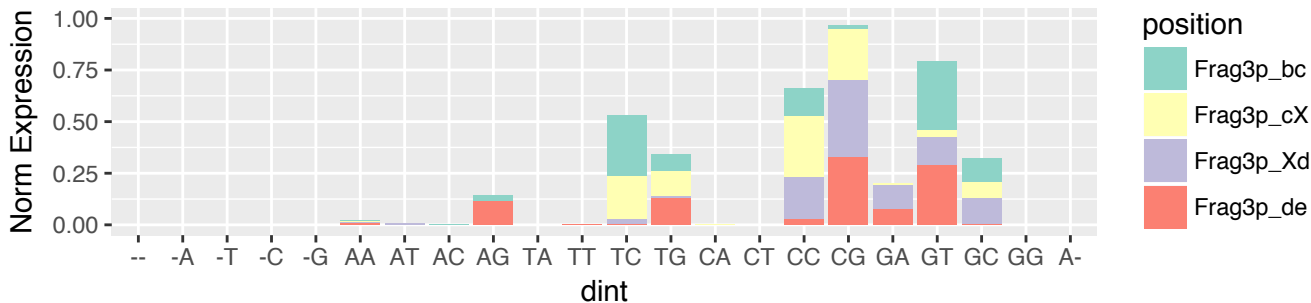

CESC (n=1089)  
 i-tRF & exclusive (n=246)  
 3' terminus relative to 3' end of the tRNA (n=34)

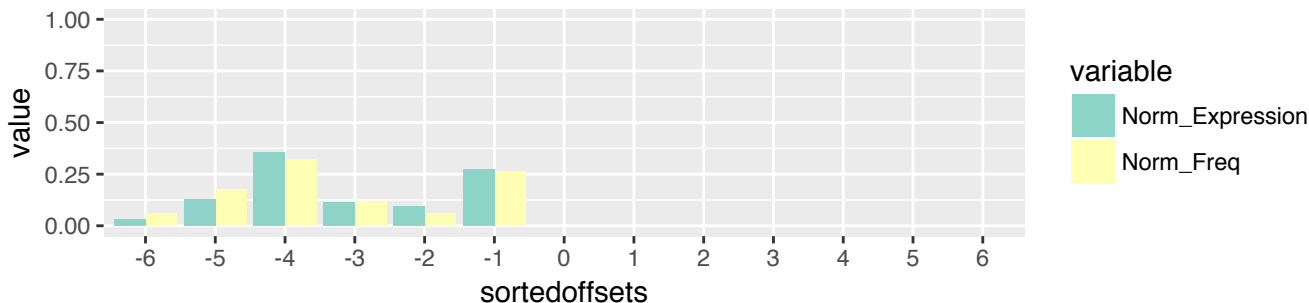

CESC (n=1089)  
 i-tRF & exclusive (n=246)  
 3' terminus relative to 3' end of the tRNA (n=34)

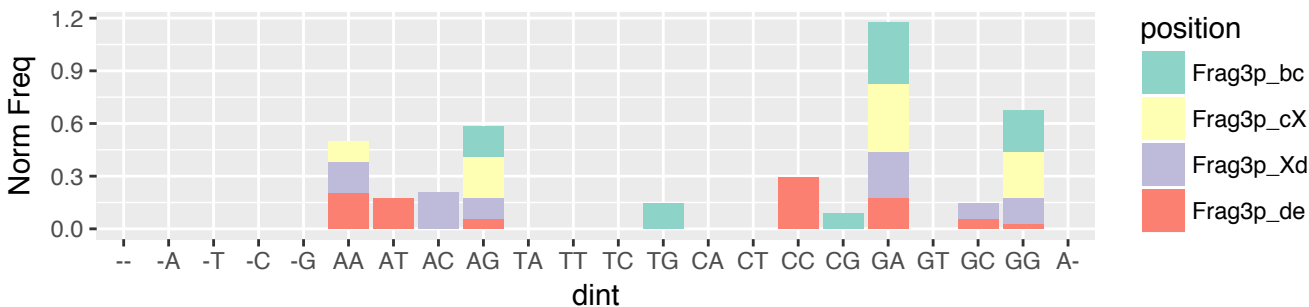

CESC (n=1089)  
 i-tRF & exclusive (n=246)  
 3' terminus relative to 3' end of the tRNA (n=34)

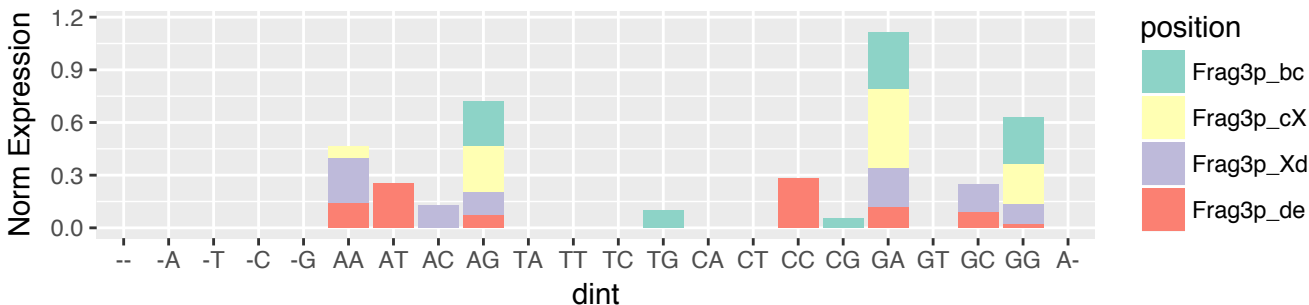

CESC (n=1089)  
 3'-tRF & exclusive (n=168)  
 5' terminus relative to 5' stem of T-loop (n=108)

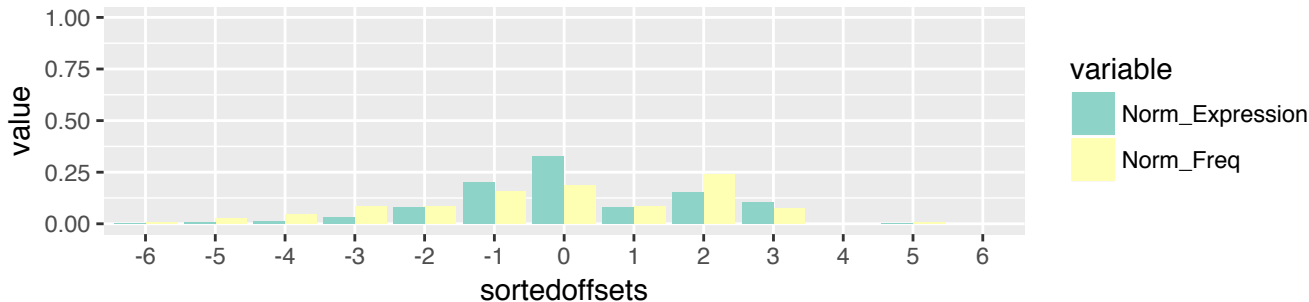

CESC (n=1089)  
 3'-tRF & exclusive (n=168)  
 5' terminus relative to 5' stem of T-loop (n=108)

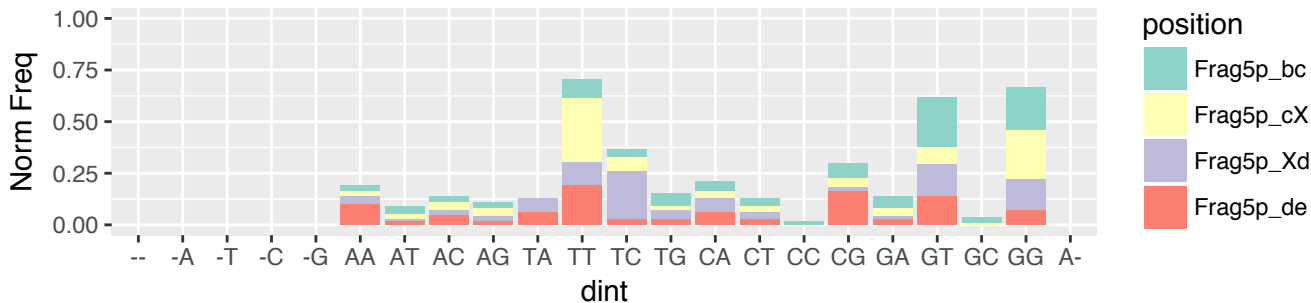

CESC (n=1089)  
 3'-tRF & exclusive (n=168)  
 5' terminus relative to 5' stem of T-loop (n=108)

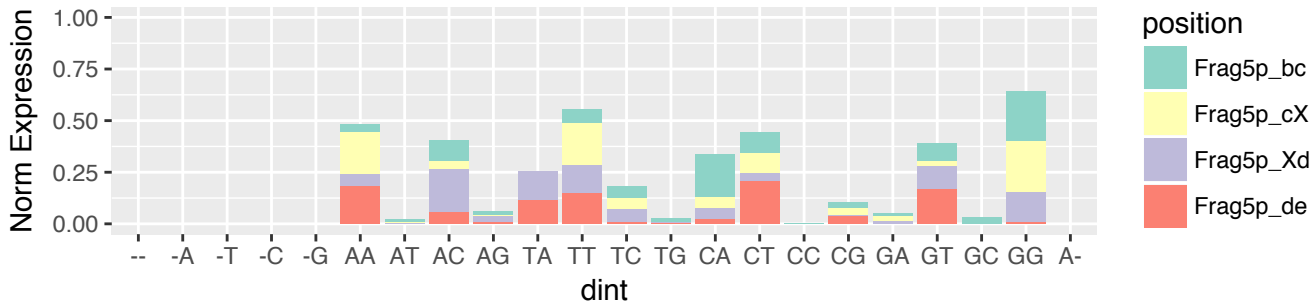

CESC (n=1089)  
 3'-tRF & exclusive (n=168)  
 5' terminus relative to 3' stem of T-loop (n=60)

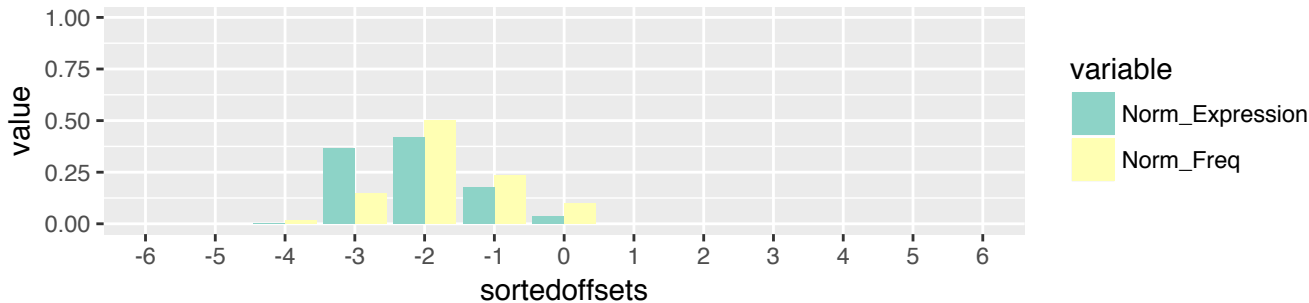

CESC (n=1089)  
 3'-tRF & exclusive (n=168)  
 5' terminus relative to 3' stem of T-loop (n=60)

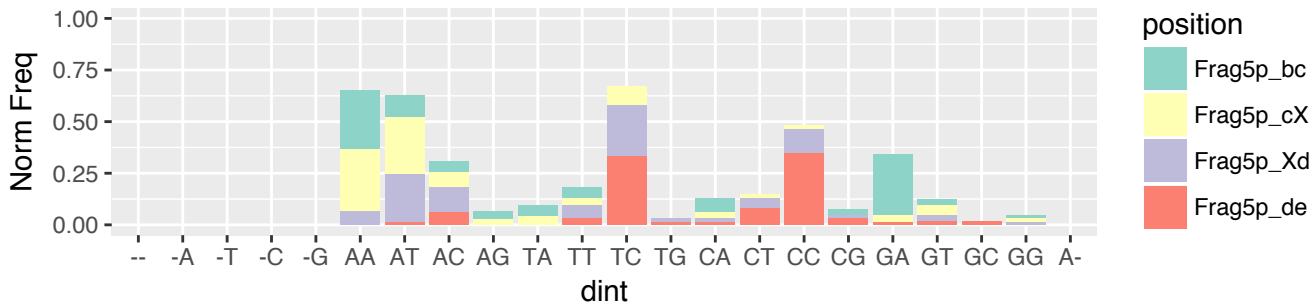

CESC (n=1089)  
 3'-tRF & exclusive (n=168)  
 5' terminus relative to 3' stem of T-loop (n=60)

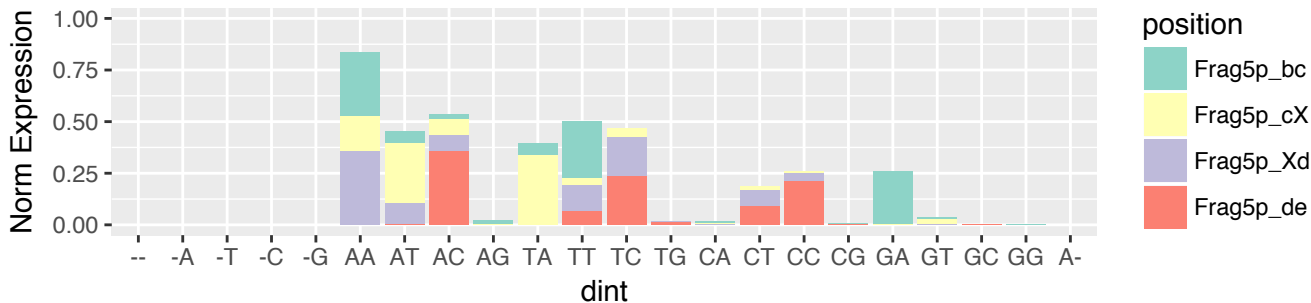

CESC (n=1089)  
 3'-tRF & exclusive (n=168)  
 3' terminus relative to 3' end of the tRNA (n=168)

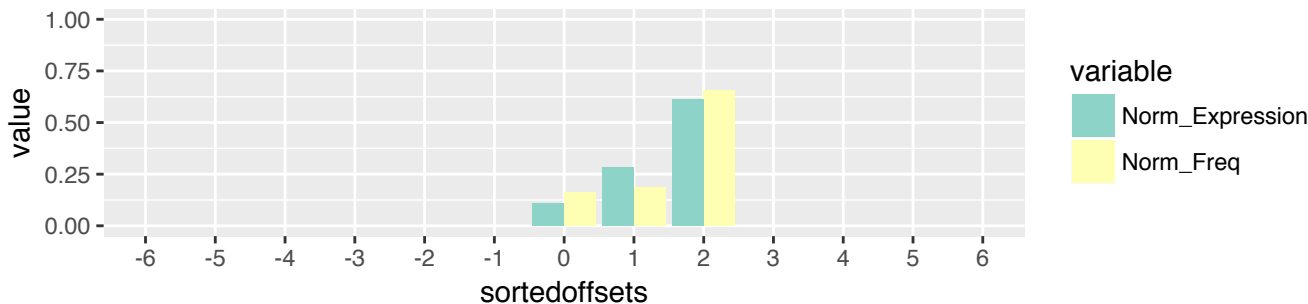

CESC (n=1089)  
 3'-tRF & exclusive (n=168)  
 3' terminus relative to 3' end of the tRNA (n=168)

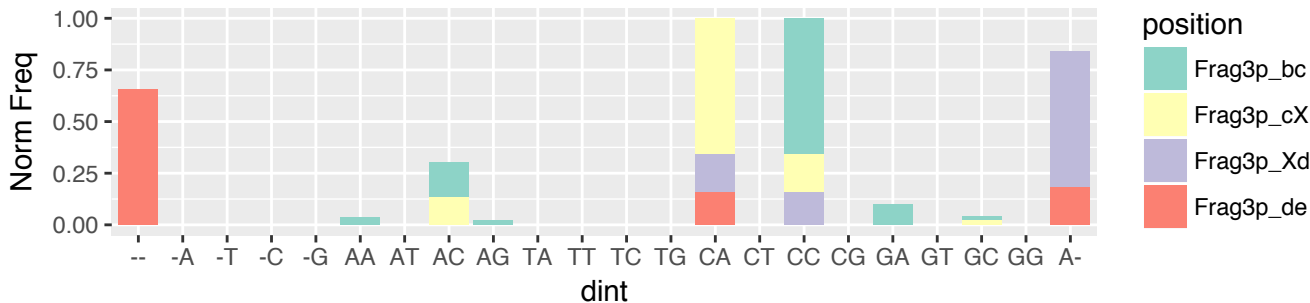

CESC (n=1089)  
 3'-tRF & exclusive (n=168)  
 3' terminus relative to 3' end of the tRNA (n=168)

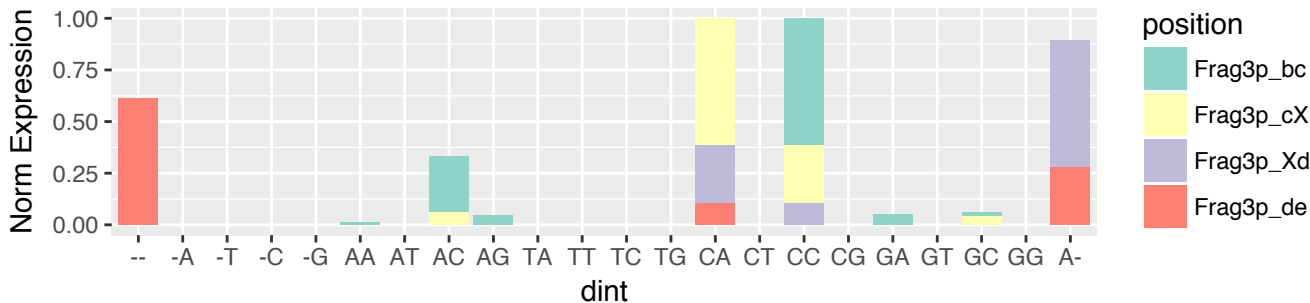



CHOL (n=605)  
 5'-half & exclusive (n=4)  
 5' terminus relative to 5' end of the tRNA (n=4)



CHOL (n=605)  
 5'-half & exclusive (n=4)  
 5' terminus relative to 5' end of the tRNA (n=4)



CHOL (n=605)  
 5'-half & exclusive (n=4)  
 5' terminus relative to 5' end of the tRNA (n=4)

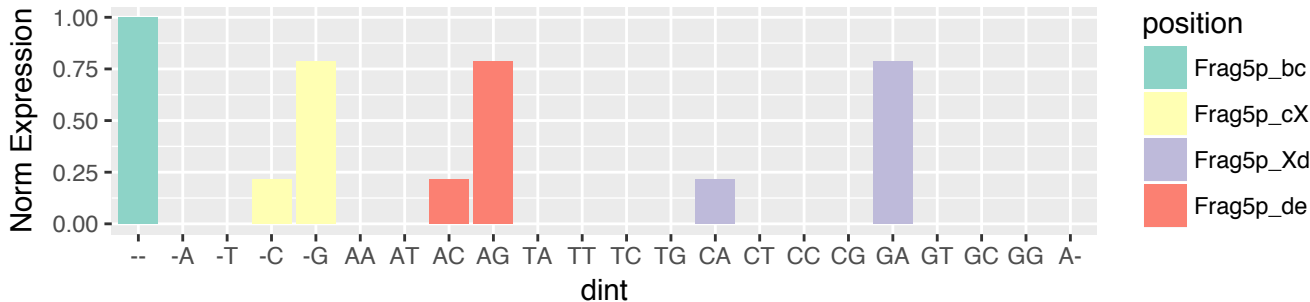

CHOL (n=605)  
 5'-half & exclusive (n=4)  
 3' terminus relative to 5' stem of A-loop (n=4)

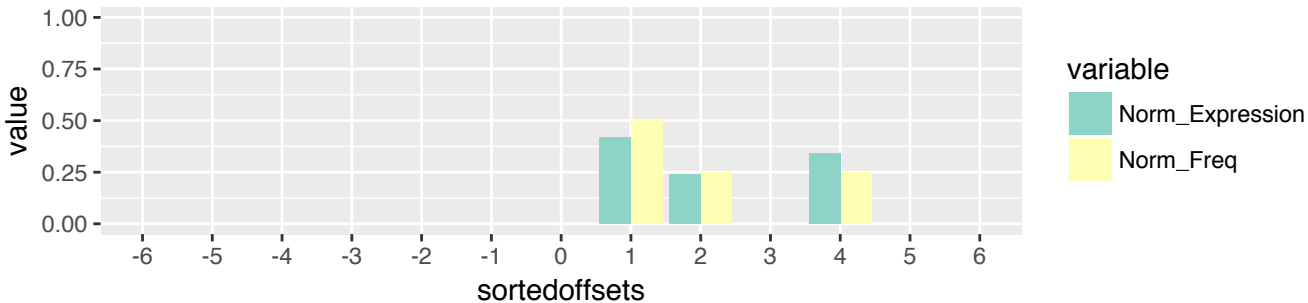

CHOL (n=605)  
 5'-half & exclusive (n=4)  
 3' terminus relative to 5' stem of A-loop (n=4)

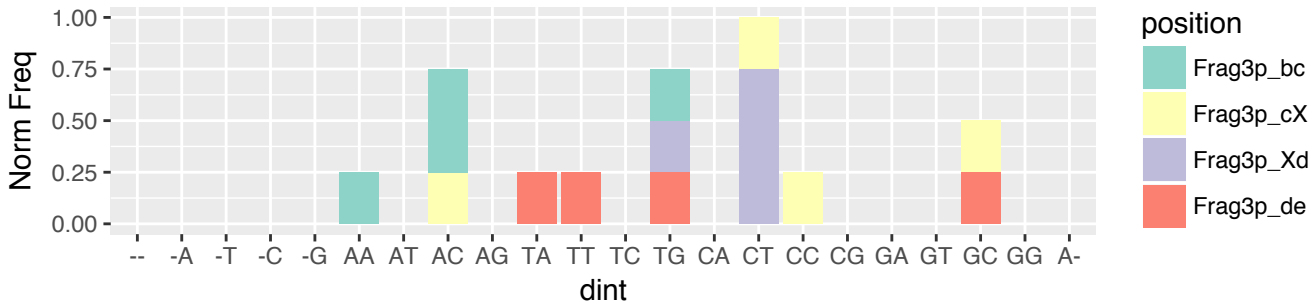

CHOL (n=605)  
 5'-half & exclusive (n=4)  
 3' terminus relative to 5' stem of A-loop (n=4)

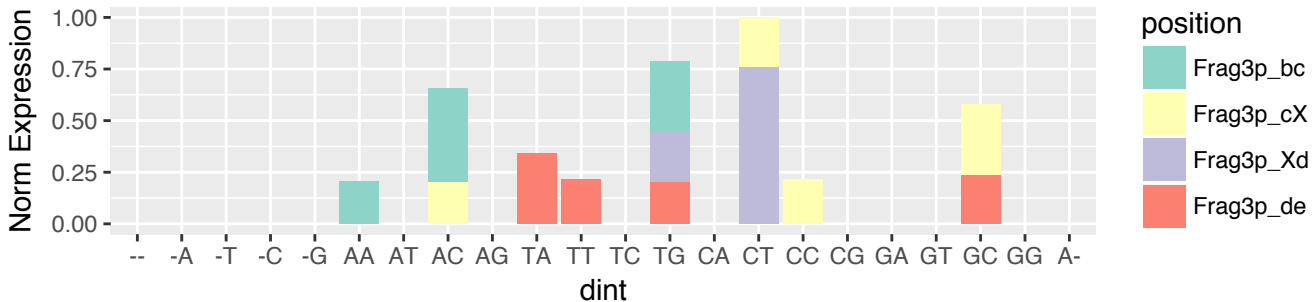

CHOL (n=605)  
 5'-tRF & exclusive (n=116)  
 5' terminus relative to 5' end of the tRNA (n=116)

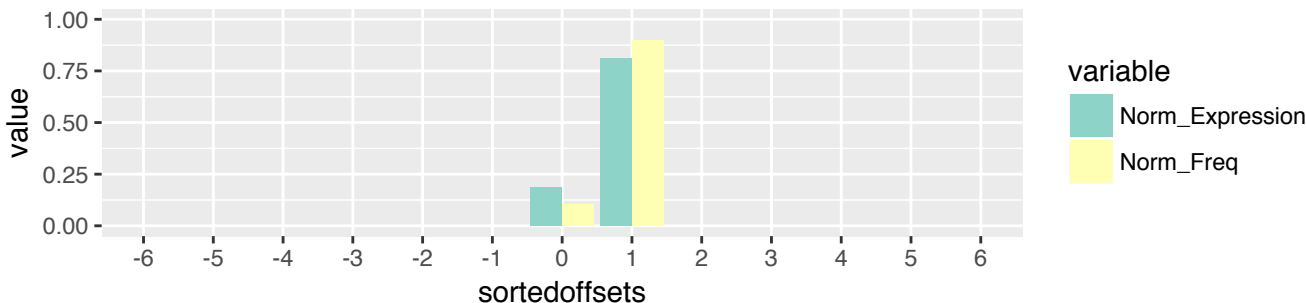

CHOL (n=605)  
 5'-tRF & exclusive (n=116)  
 5' terminus relative to 5' end of the tRNA (n=116)

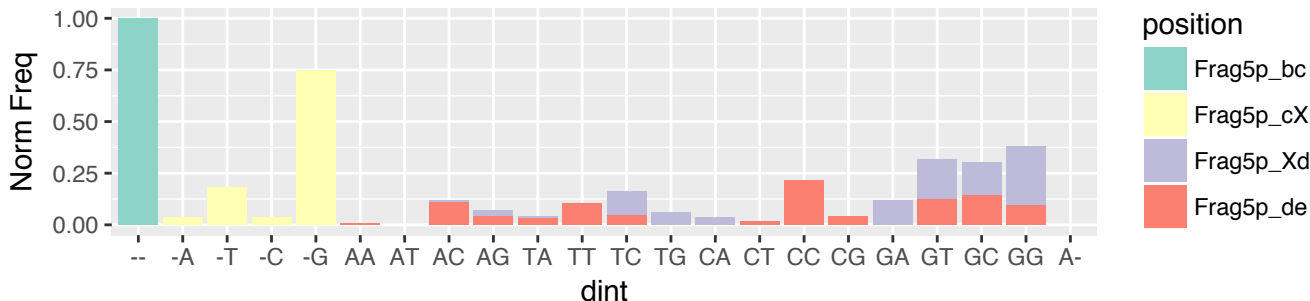

CHOL (n=605)  
 5'-tRF & exclusive (n=116)  
 5' terminus relative to 5' end of the tRNA (n=116)

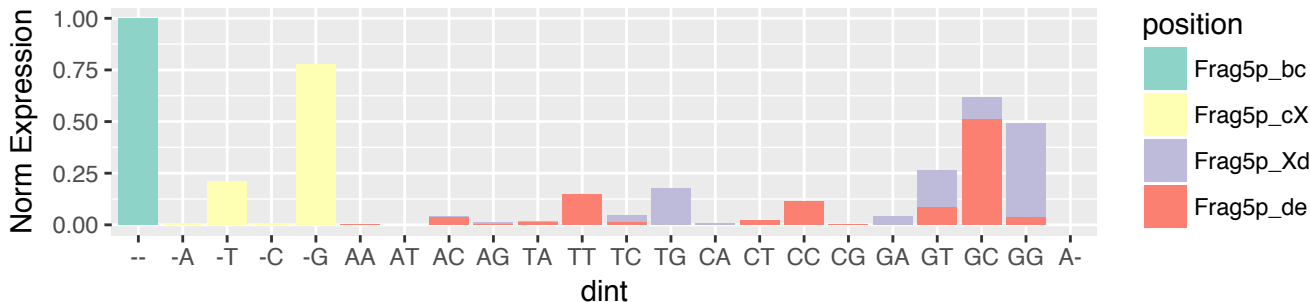

CHOL (n=605)  
 5'-tRF & exclusive (n=116)  
 3' terminus relative to 5' stem of D-loop (n=3)

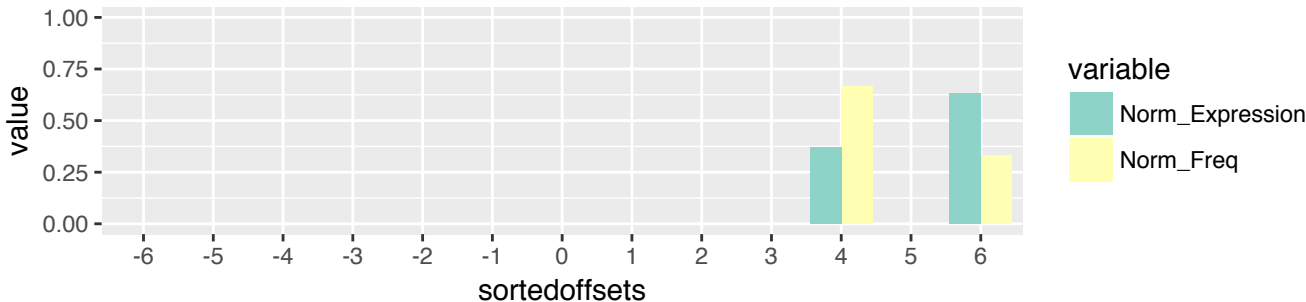

CHOL (n=605)  
 5'-tRF & exclusive (n=116)  
 3' terminus relative to 5' stem of D-loop (n=3)

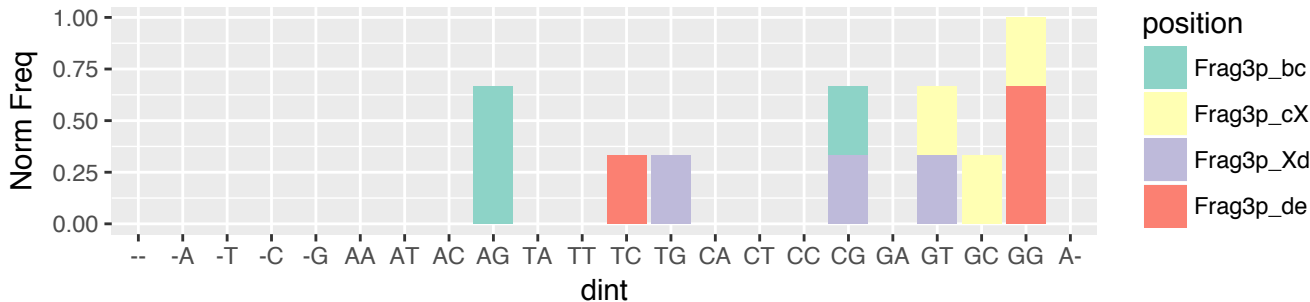

CHOL (n=605)  
 5'-tRF & exclusive (n=116)  
 3' terminus relative to 5' stem of D-loop (n=3)

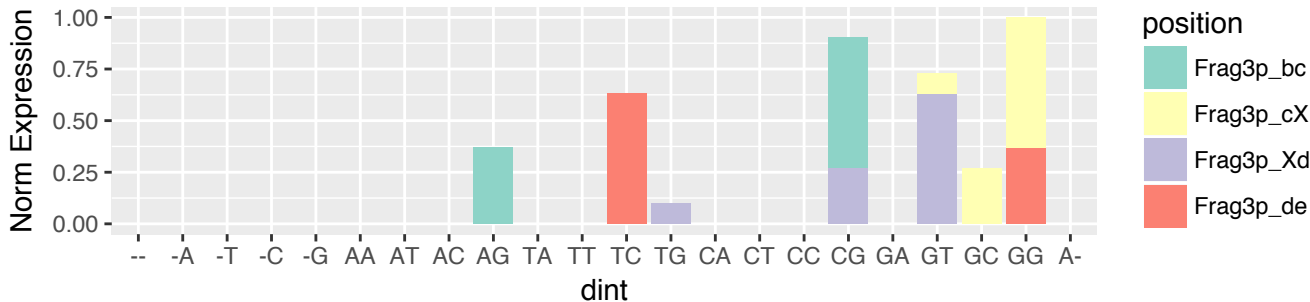

CHOL (n=605)  
 5'-tRF & exclusive (n=116)  
 3' terminus relative to 3' stem of D-loop (n=103)

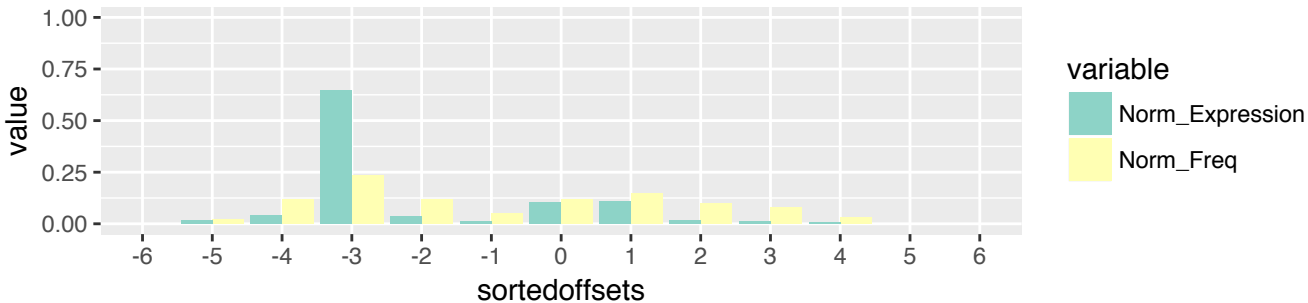

CHOL (n=605)  
 5'-tRF & exclusive (n=116)  
 3' terminus relative to 3' stem of D-loop (n=103)

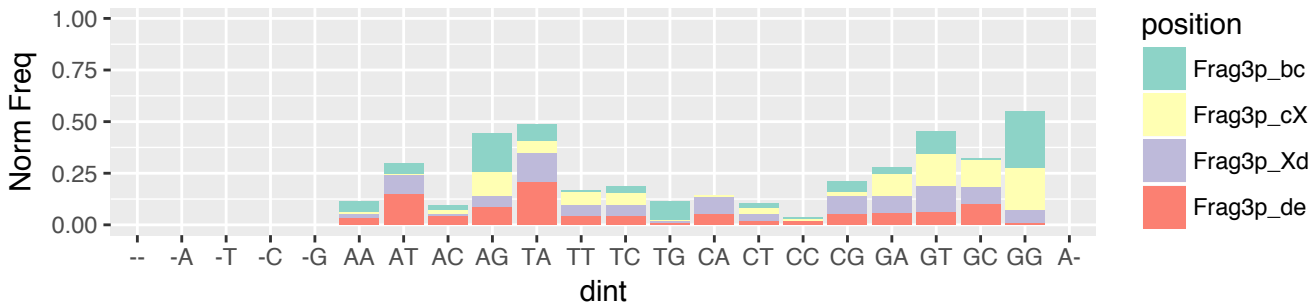

CHOL (n=605)  
 5'-tRF & exclusive (n=116)  
 3' terminus relative to 3' stem of D-loop (n=103)

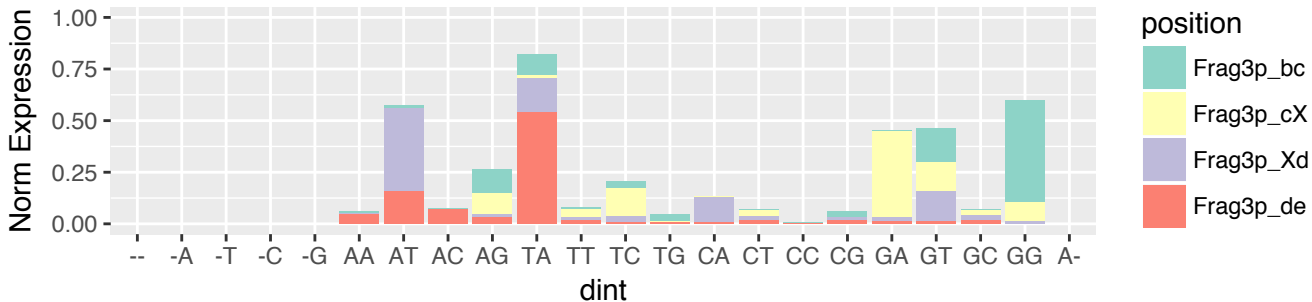

CHOL (n=605)  
 5'-tRF & exclusive (n=116)  
 3' terminus relative to 5' stem of A-loop (n=6)

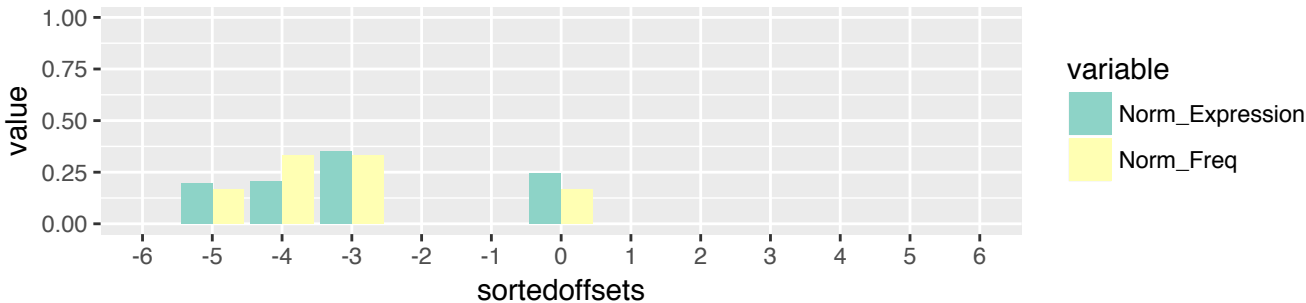

CHOL (n=605)  
 5'-tRF & exclusive (n=116)  
 3' terminus relative to 5' stem of A-loop (n=6)

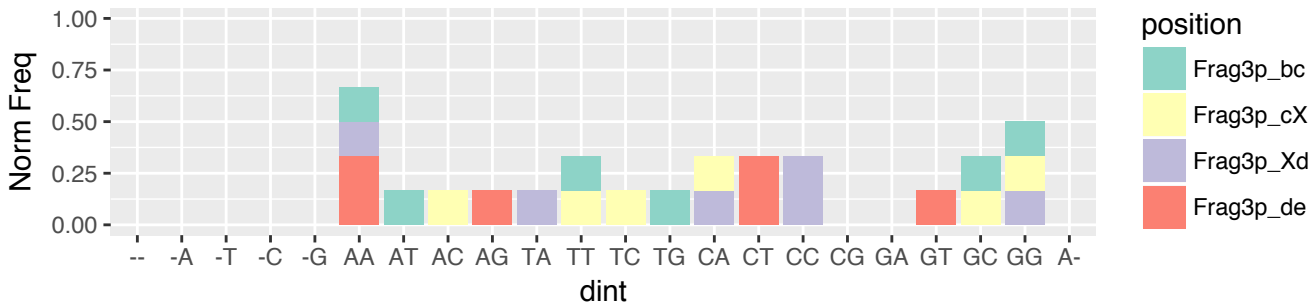

CHOL (n=605)  
 5'-tRF & exclusive (n=116)  
 3' terminus relative to 5' stem of A-loop (n=6)

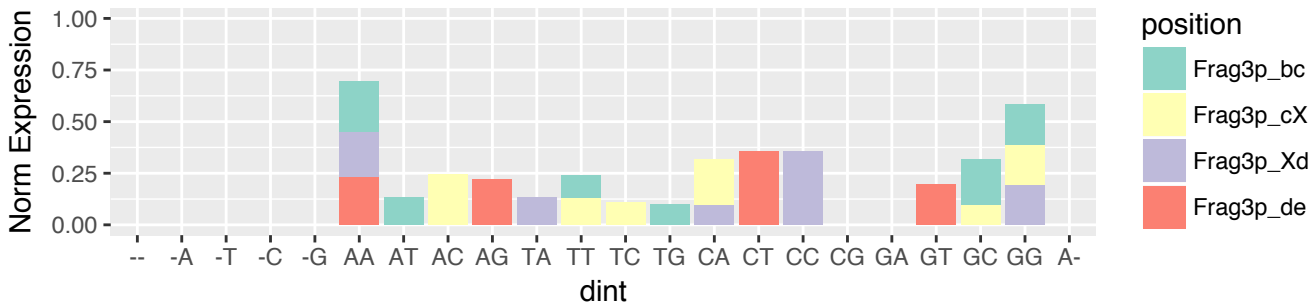

CHOL (n=605)  
 5'-tRF & exclusive (n=116)  
 3' terminus relative to 3' stem of A-loop (n=4)

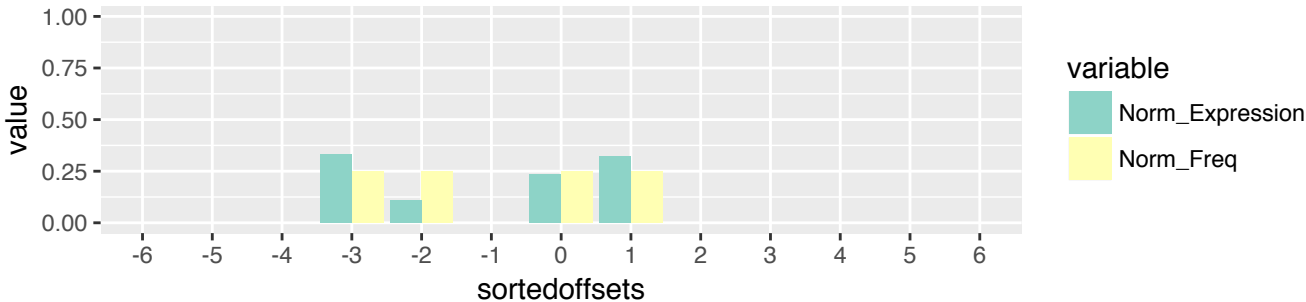

CHOL (n=605)  
 5'-tRF & exclusive (n=116)  
 3' terminus relative to 3' stem of A-loop (n=4)

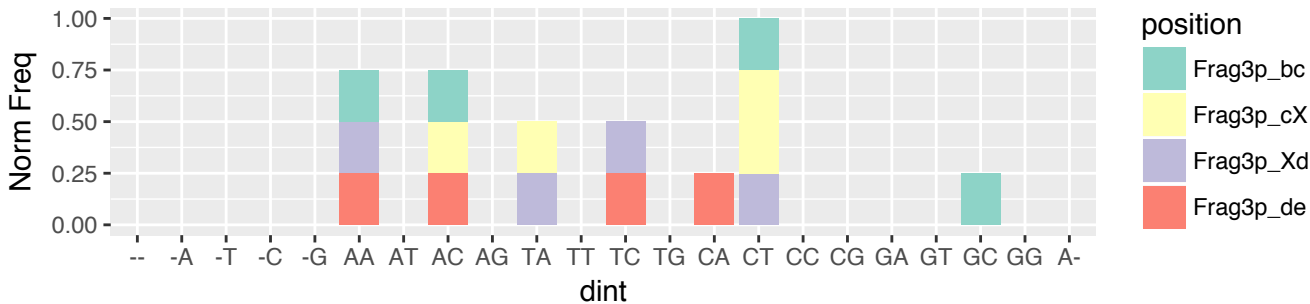

CHOL (n=605)  
 5'-tRF & exclusive (n=116)  
 3' terminus relative to 3' stem of A-loop (n=4)

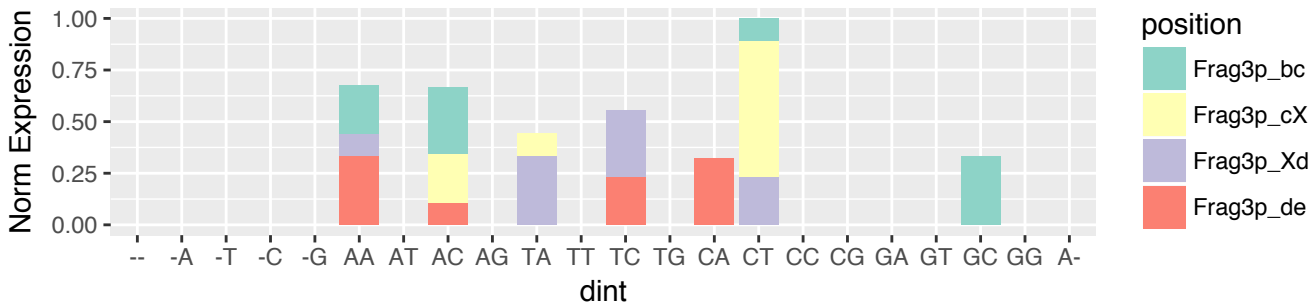

CHOL (n=605)  
i-tRF & exclusive (n=98)  
5' terminus relative to 5' end of the tRNA (n=2)

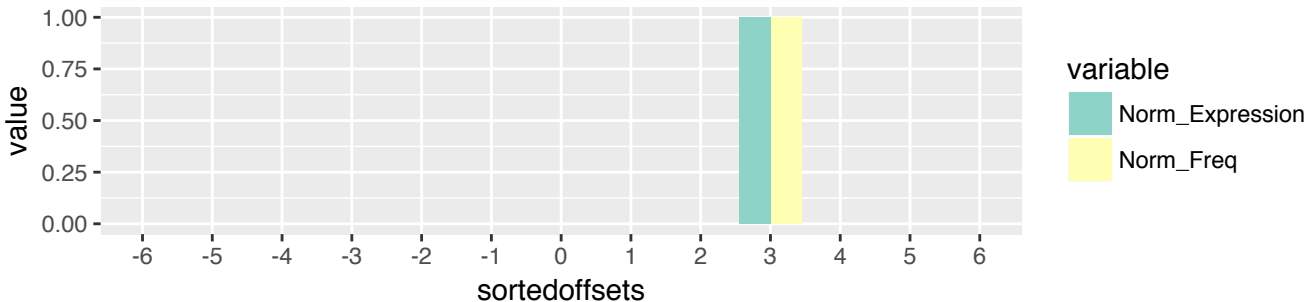

CHOL (n=605)  
i-tRF & exclusive (n=98)  
5' terminus relative to 5' end of the tRNA (n=2)

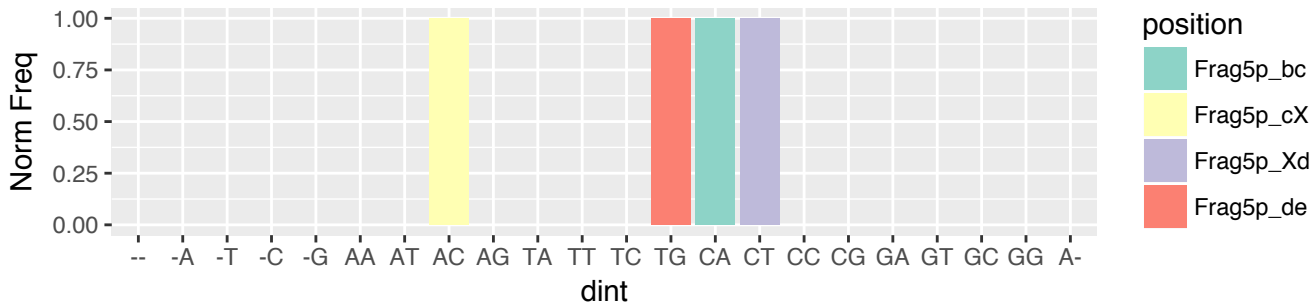

CHOL (n=605)  
i-tRF & exclusive (n=98)  
5' terminus relative to 5' end of the tRNA (n=2)

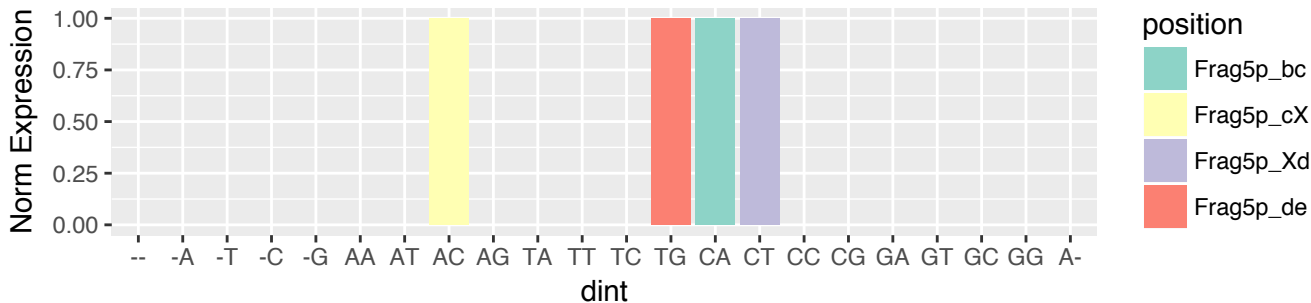



CHOL (n=605)  
 i-tRF & exclusive (n=98)  
 5' terminus relative to 5' stem of D-loop (n=41)

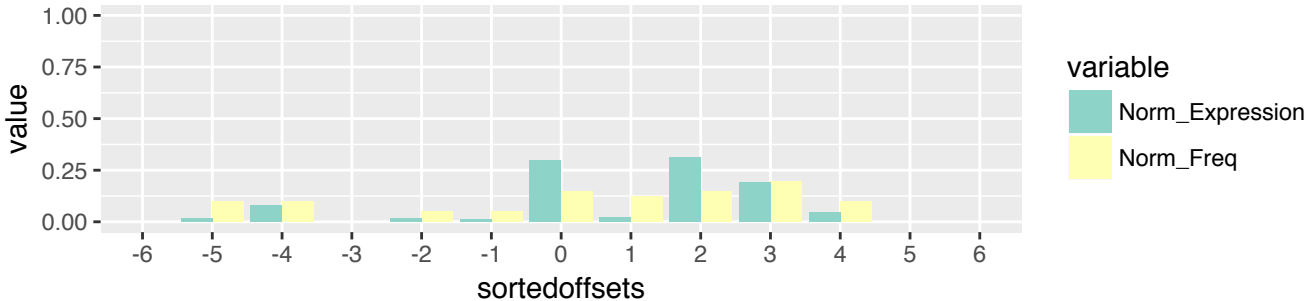

CHOL (n=605)  
 i-tRF & exclusive (n=98)  
 5' terminus relative to 5' stem of D-loop (n=41)

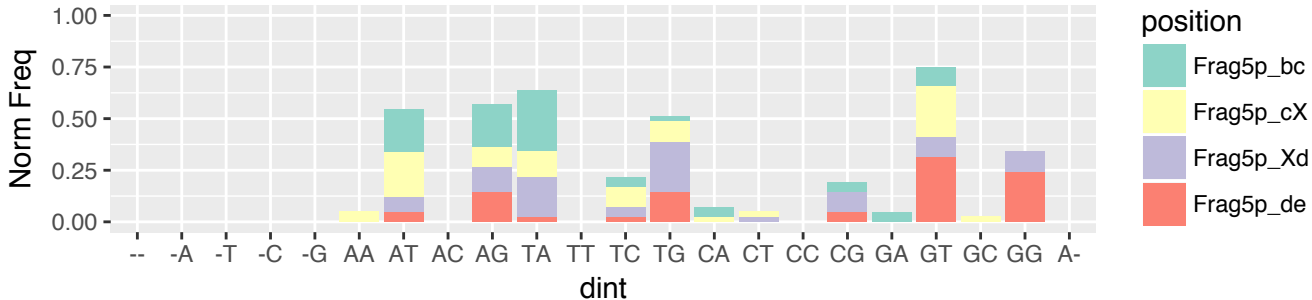

CHOL (n=605)  
 i-tRF & exclusive (n=98)  
 5' terminus relative to 5' stem of D-loop (n=41)

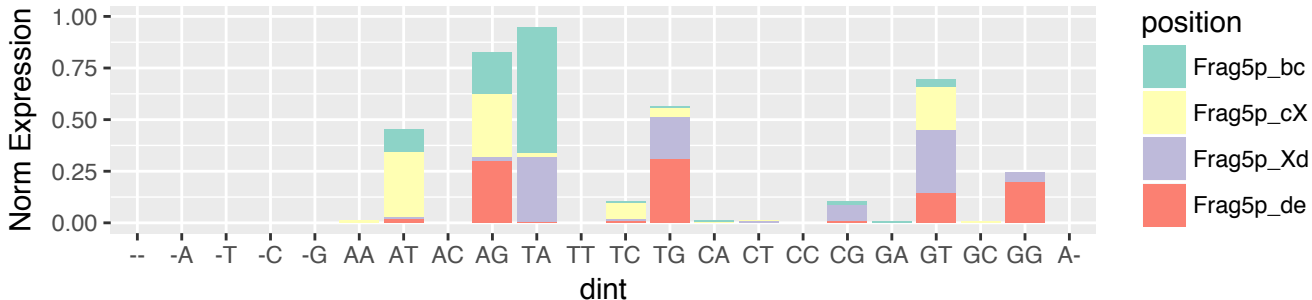

CHOL (n=605)  
i-tRF & exclusive (n=98)  
5' terminus relative to 3' stem of D-loop (n=3)

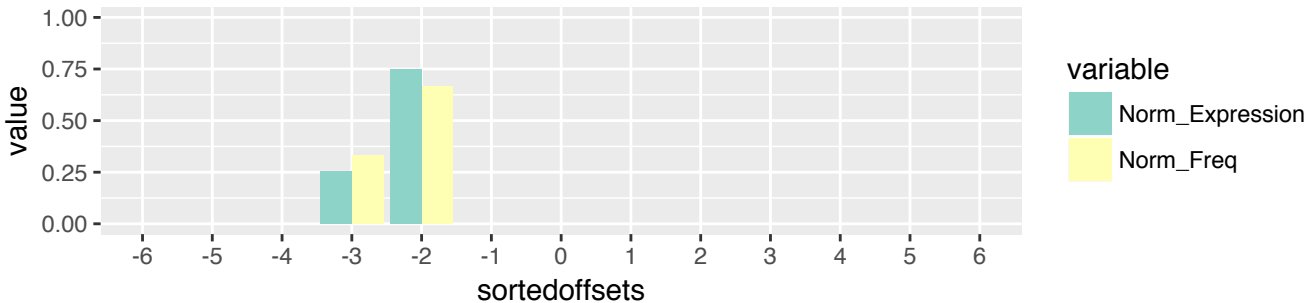

CHOL (n=605)  
i-tRF & exclusive (n=98)  
5' terminus relative to 3' stem of D-loop (n=3)

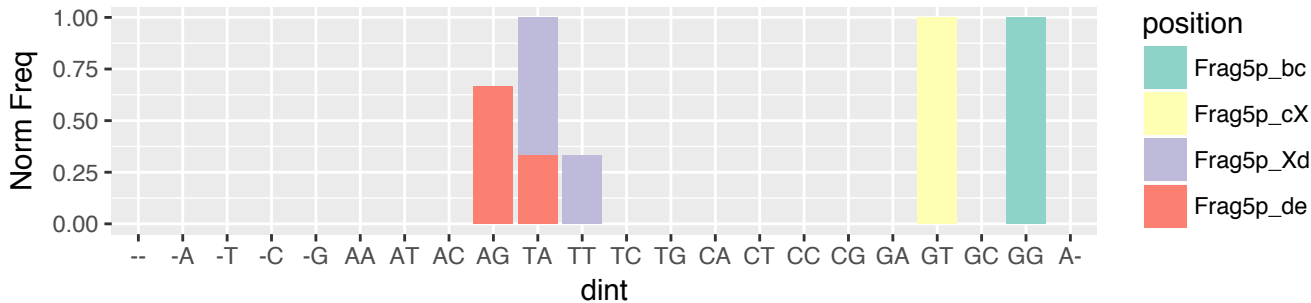

CHOL (n=605)  
i-tRF & exclusive (n=98)  
5' terminus relative to 3' stem of D-loop (n=3)

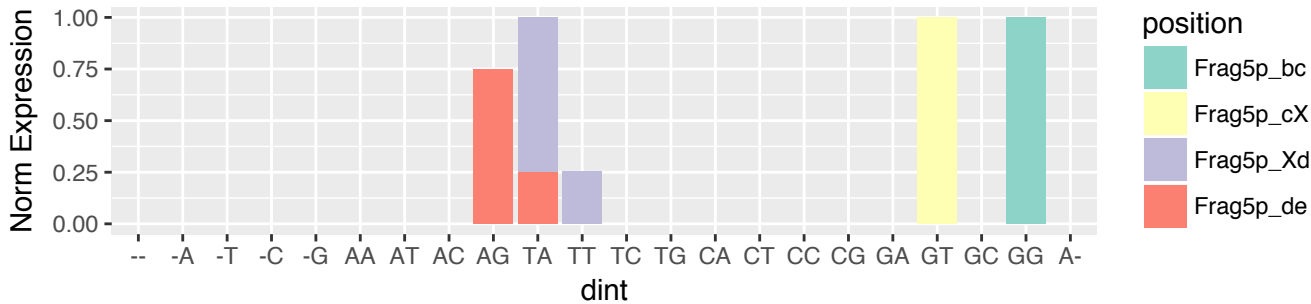

CHOL (n=605)  
i-tRF & exclusive (n=98)  
5' terminus relative to 5' stem of A-loop (n=14)

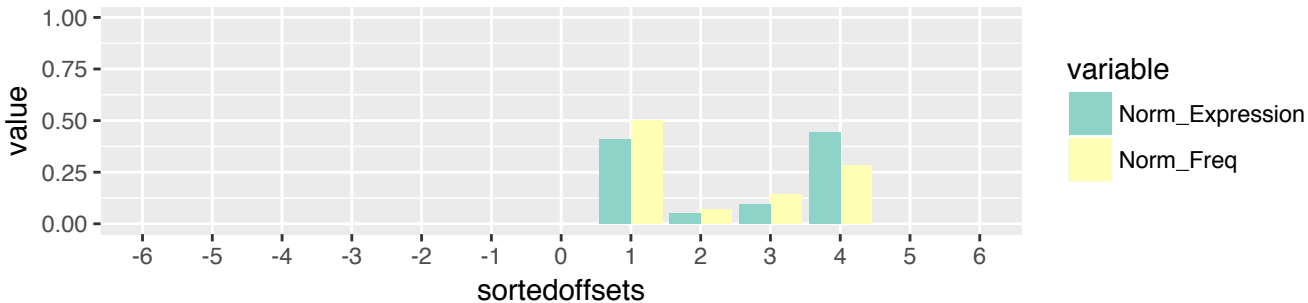

CHOL (n=605)  
i-tRF & exclusive (n=98)  
5' terminus relative to 5' stem of A-loop (n=14)

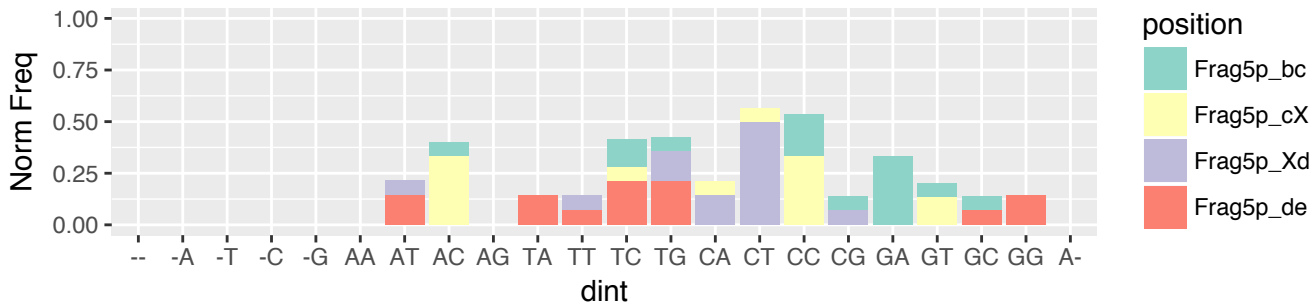

CHOL (n=605)  
i-tRF & exclusive (n=98)  
5' terminus relative to 5' stem of A-loop (n=14)

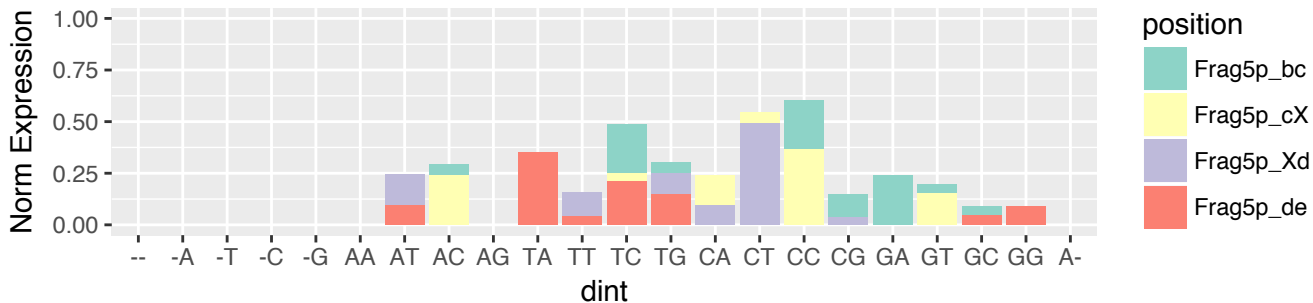

CHOL (n=605)  
i-tRF & exclusive (n=98)  
5' terminus relative to 3' stem of A-loop (n=36)

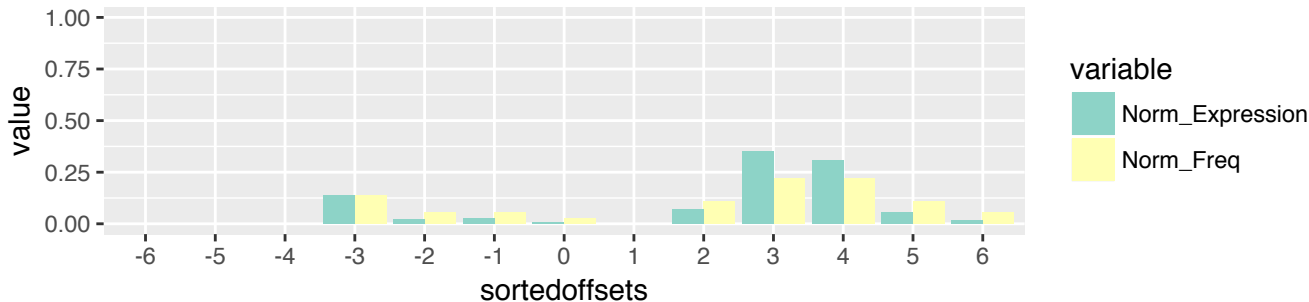

CHOL (n=605)  
i-tRF & exclusive (n=98)  
5' terminus relative to 3' stem of A-loop (n=36)

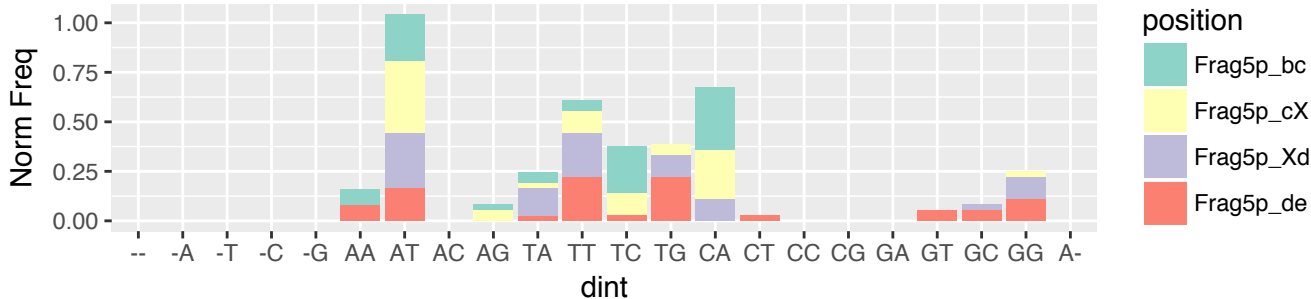

CHOL (n=605)  
i-tRF & exclusive (n=98)  
5' terminus relative to 3' stem of A-loop (n=36)

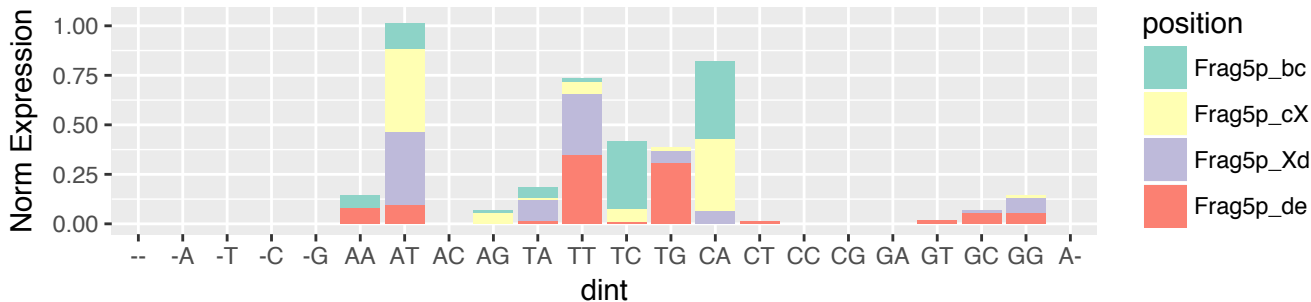

CHOL (n=605)  
i-tRF & exclusive (n=98)  
5' terminus relative to 5' stem of T-loop (n=2)

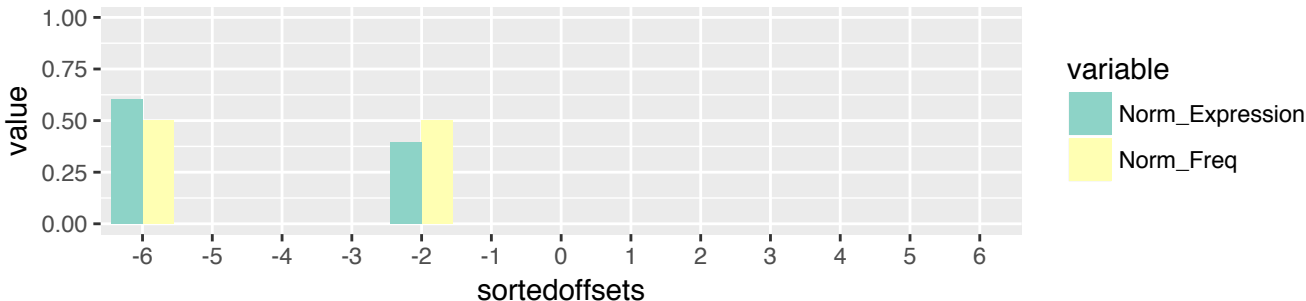

CHOL (n=605)  
i-tRF & exclusive (n=98)  
5' terminus relative to 5' stem of T-loop (n=2)

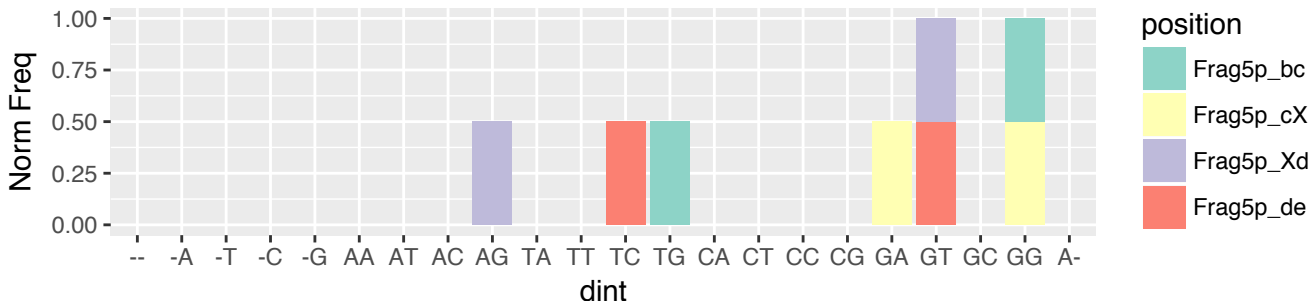

CHOL (n=605)  
i-tRF & exclusive (n=98)  
5' terminus relative to 5' stem of T-loop (n=2)

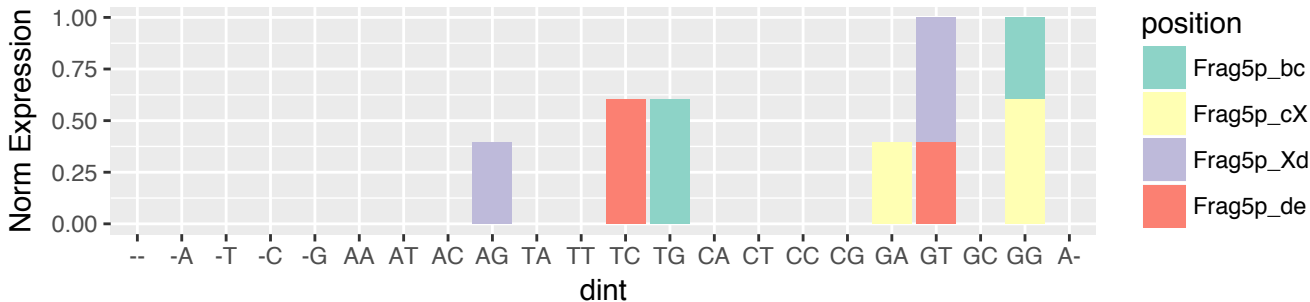

CHOL (n=605)  
i-tRF & exclusive (n=98)  
3' terminus relative to 5' stem of A-loop (n=37)

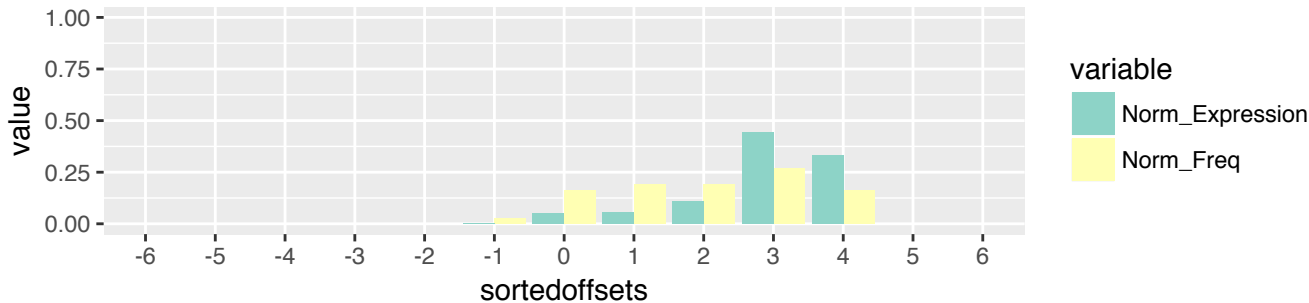

CHOL (n=605)  
i-tRF & exclusive (n=98)  
3' terminus relative to 5' stem of A-loop (n=37)

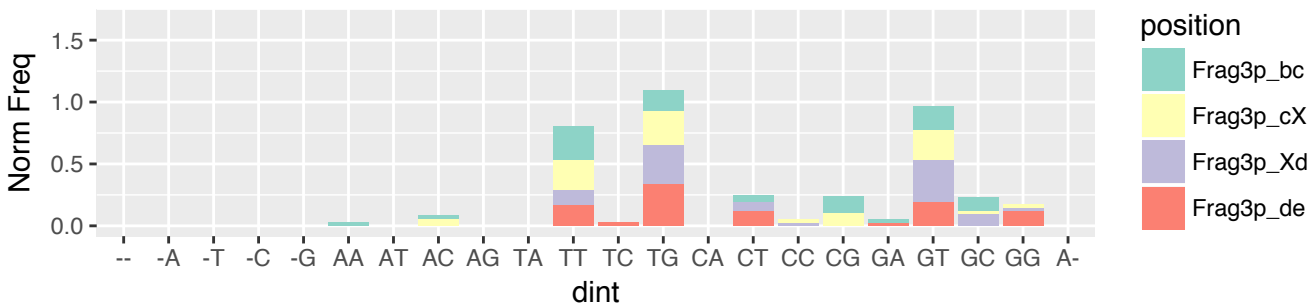

CHOL (n=605)  
i-tRF & exclusive (n=98)  
3' terminus relative to 5' stem of A-loop (n=37)

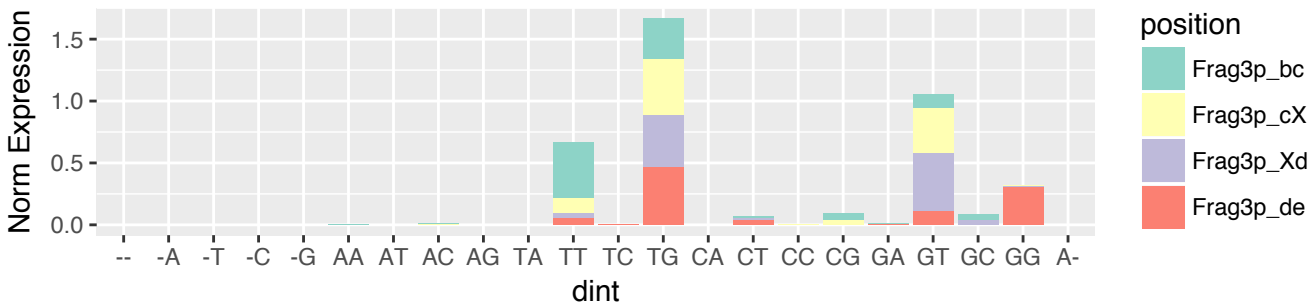

CHOL (n=605)  
 i-tRF & exclusive (n=98)  
 3' terminus relative to 3' stem of A-loop (n=11)

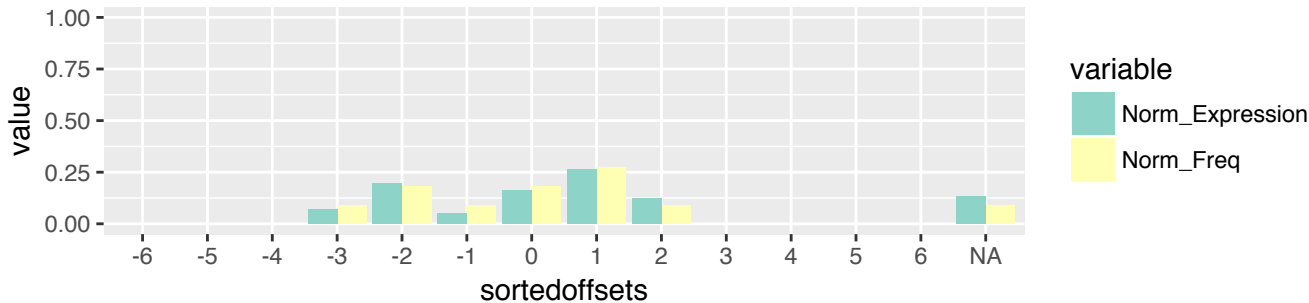

CHOL (n=605)  
 i-tRF & exclusive (n=98)  
 3' terminus relative to 3' stem of A-loop (n=11)

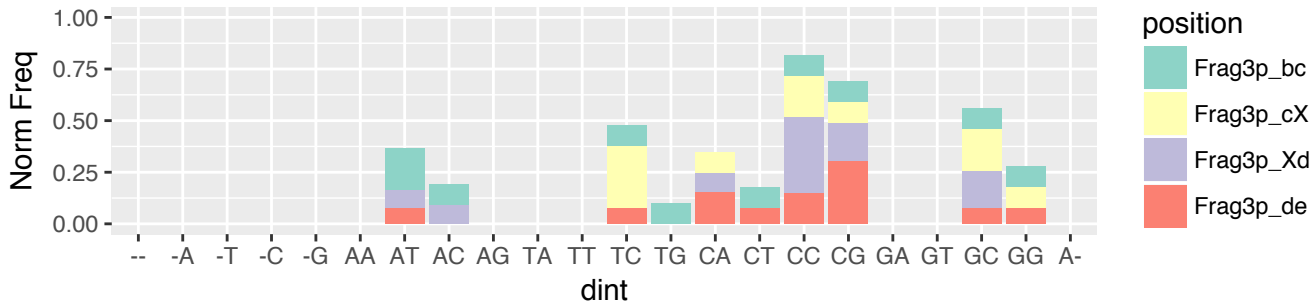

CHOL (n=605)  
 i-tRF & exclusive (n=98)  
 3' terminus relative to 3' stem of A-loop (n=11)

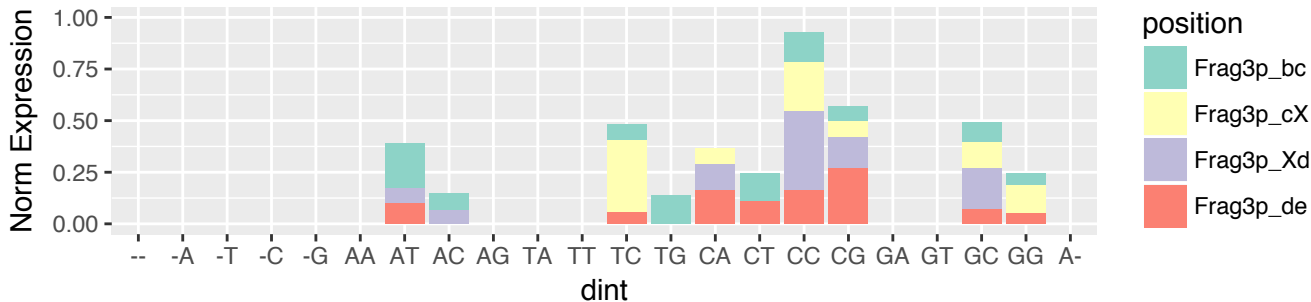

CHOL (n=605)  
 i-tRF & exclusive (n=98)  
 3' terminus relative to 5' stem of T-loop (n=17)

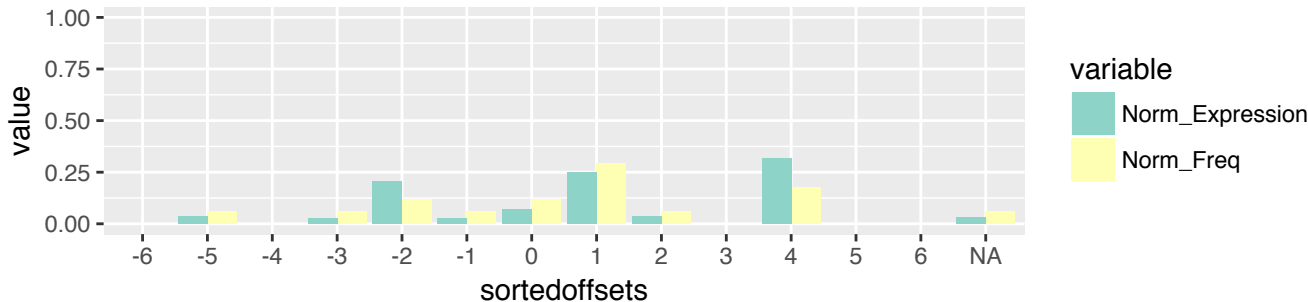

CHOL (n=605)  
 i-tRF & exclusive (n=98)  
 3' terminus relative to 5' stem of T-loop (n=17)

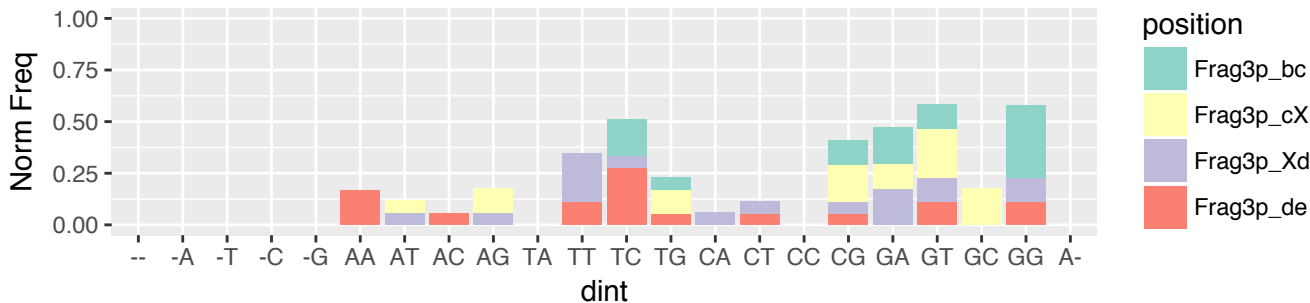

CHOL (n=605)  
 i-tRF & exclusive (n=98)  
 3' terminus relative to 5' stem of T-loop (n=17)

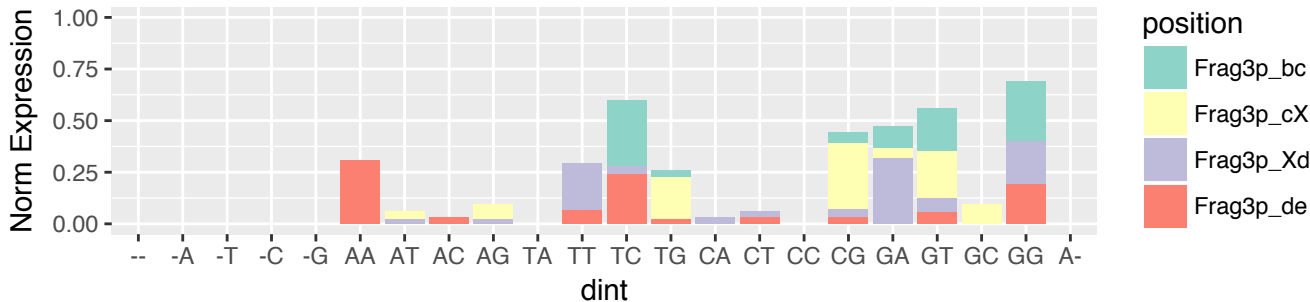



CHOL (n=605)  
i-tRF & exclusive (n=98)  
3' terminus relative to 3' stem of T-loop (n=29)

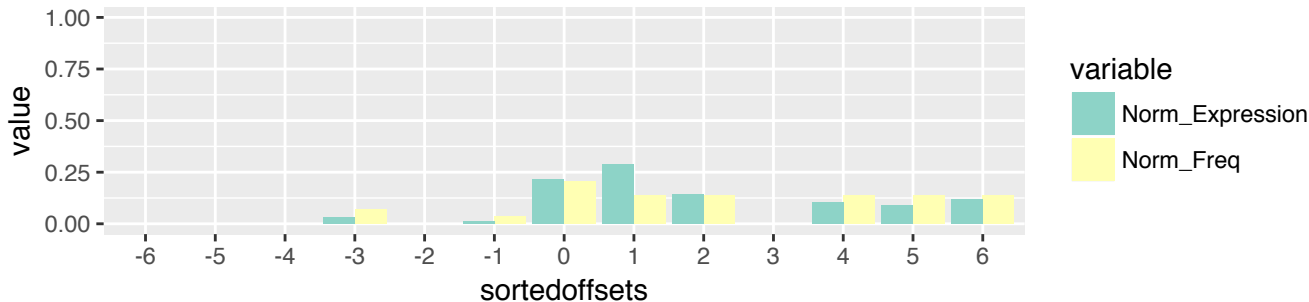

CHOL (n=605)  
i-tRF & exclusive (n=98)  
3' terminus relative to 3' stem of T-loop (n=29)

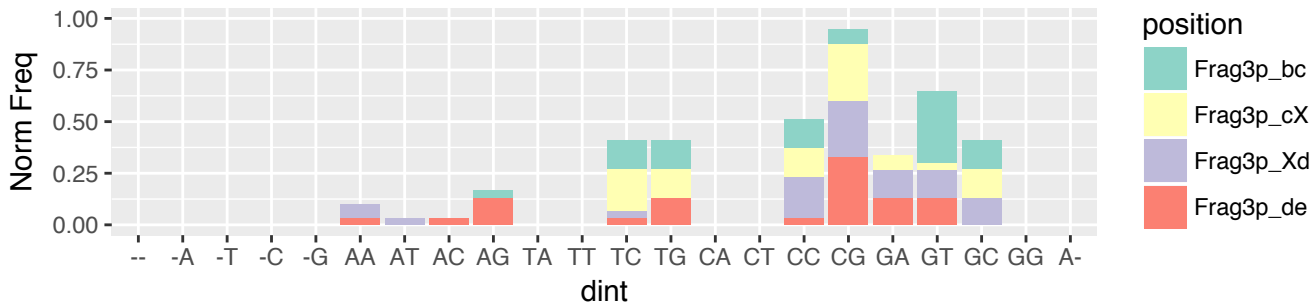

CHOL (n=605)  
i-tRF & exclusive (n=98)  
3' terminus relative to 3' stem of T-loop (n=29)

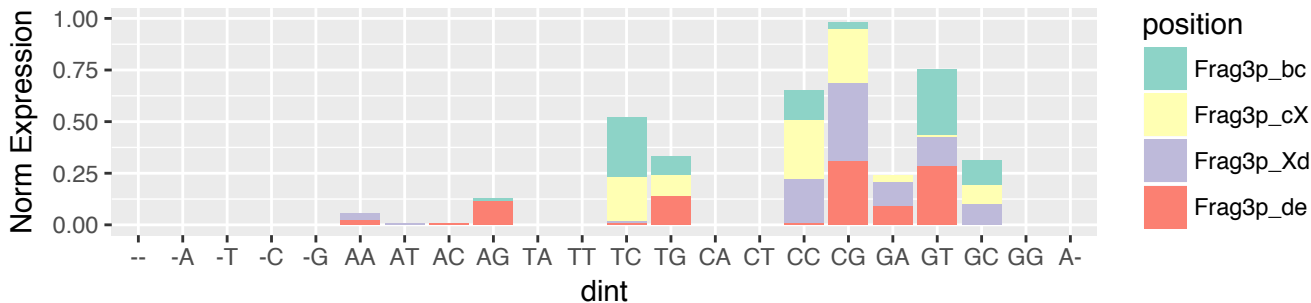

CHOL (n=605)  
i-tRF & exclusive (n=98)  
3' terminus relative to 3' end of the tRNA (n=5)

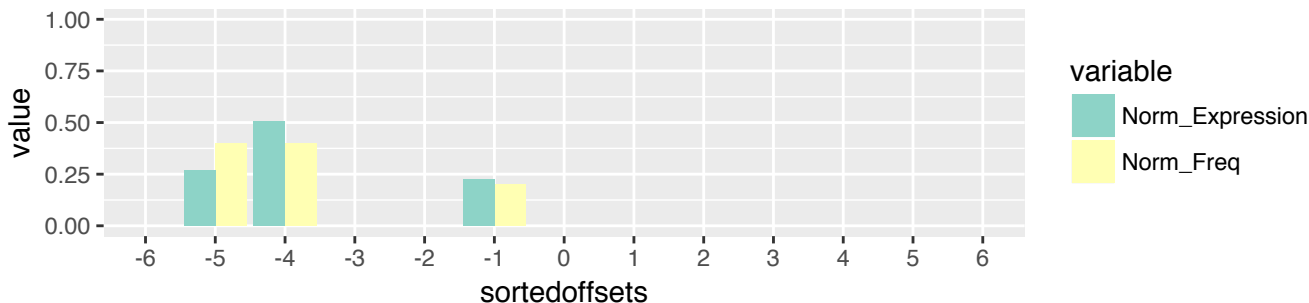

CHOL (n=605)  
i-tRF & exclusive (n=98)  
3' terminus relative to 3' end of the tRNA (n=5)

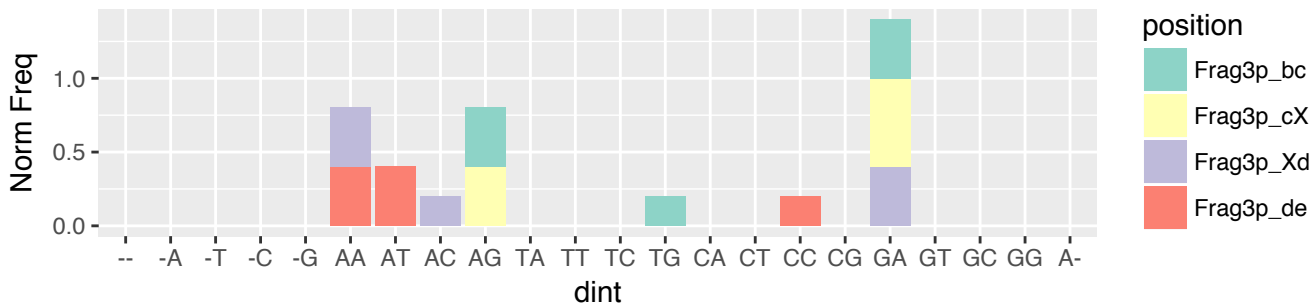

CHOL (n=605)  
i-tRF & exclusive (n=98)  
3' terminus relative to 3' end of the tRNA (n=5)

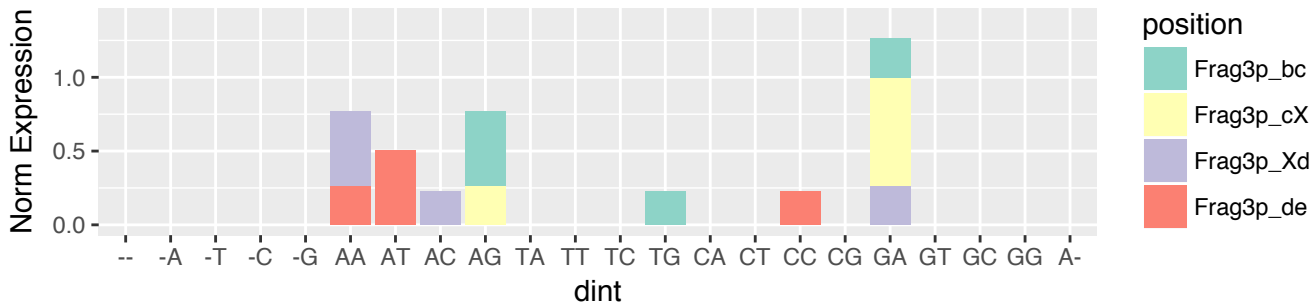

CHOL (n=605)  
3'-tRF & exclusive (n=115)  
5' terminus relative to 5' stem of T-loop (n=79)

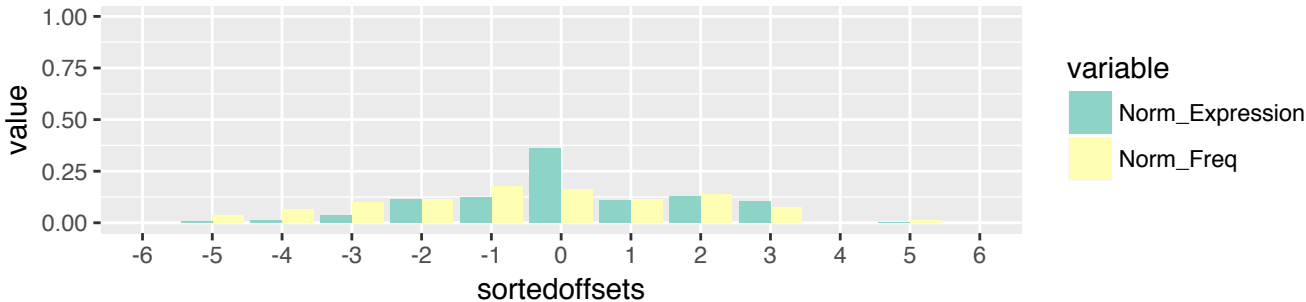

CHOL (n=605)  
3'-tRF & exclusive (n=115)  
5' terminus relative to 5' stem of T-loop (n=79)

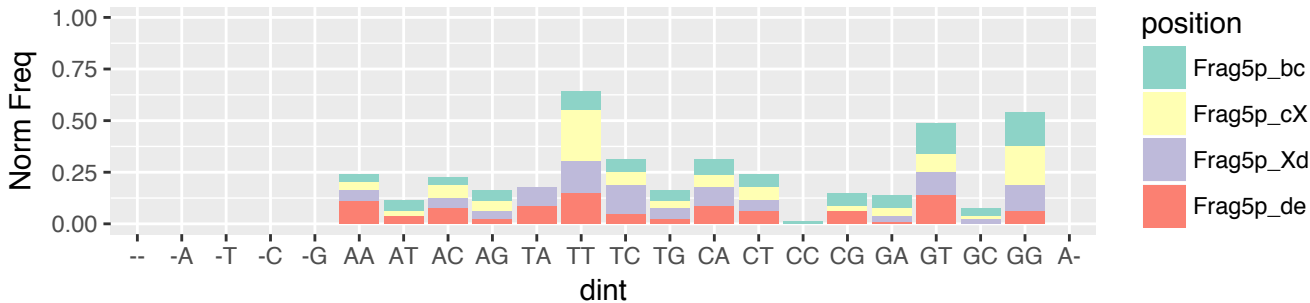

CHOL (n=605)  
3'-tRF & exclusive (n=115)  
5' terminus relative to 5' stem of T-loop (n=79)

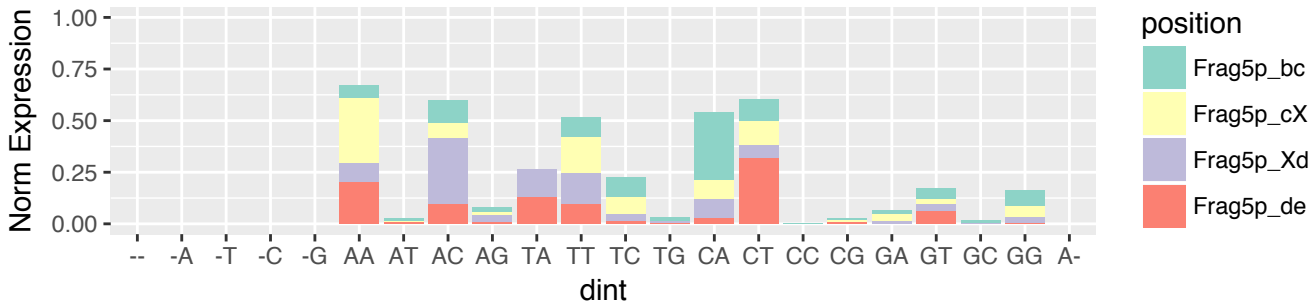

CHOL (n=605)  
 3'-tRF & exclusive (n=115)  
 5' terminus relative to 3' stem of T-loop (n=36)

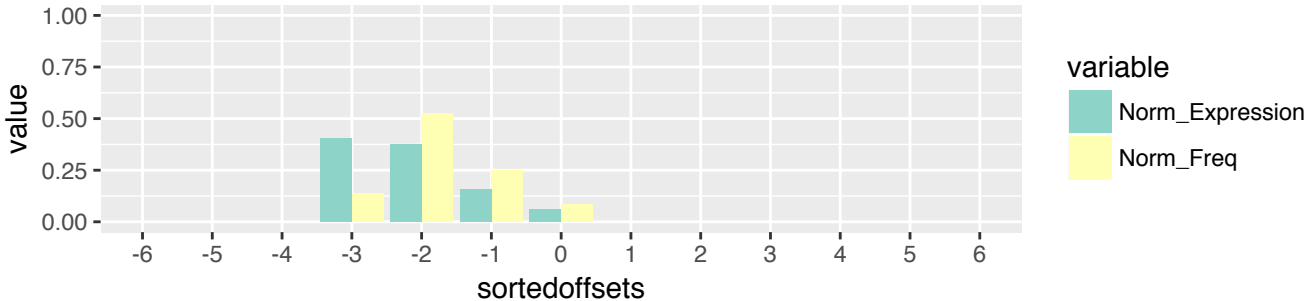

CHOL (n=605)  
 3'-tRF & exclusive (n=115)  
 5' terminus relative to 3' stem of T-loop (n=36)

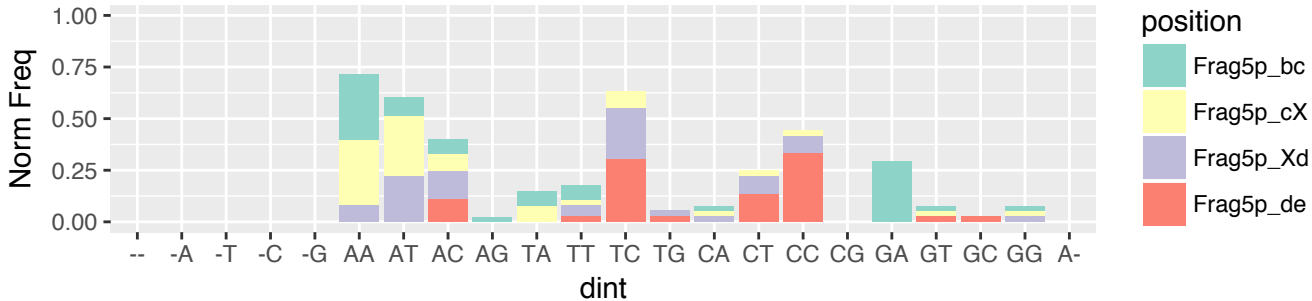

CHOL (n=605)  
 3'-tRF & exclusive (n=115)  
 5' terminus relative to 3' stem of T-loop (n=36)

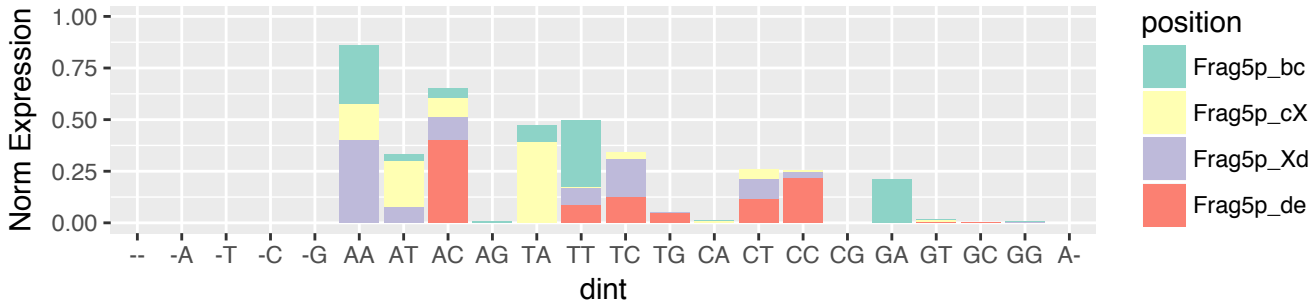

CHOL (n=605)  
 3'-tRF & exclusive (n=115)  
 3' terminus relative to 3' end of the tRNA (n=115)

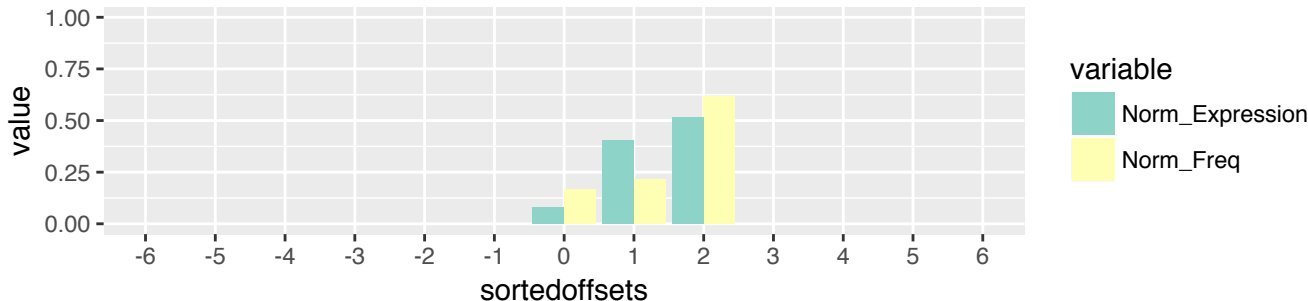

CHOL (n=605)  
 3'-tRF & exclusive (n=115)  
 3' terminus relative to 3' end of the tRNA (n=115)

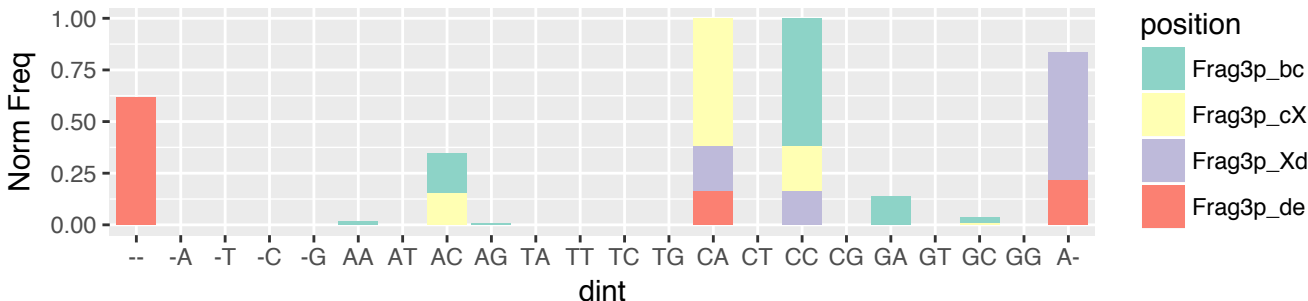

CHOL (n=605)  
 3'-tRF & exclusive (n=115)  
 3' terminus relative to 3' end of the tRNA (n=115)

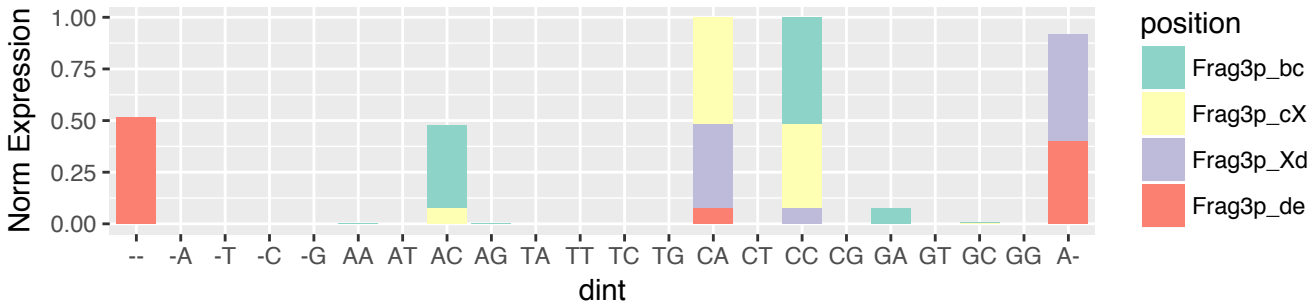

COAD (n=1245)  
 5'-half & exclusive (n=5)  
 5' terminus relative to 5' end of the tRNA (n=5)



COAD (n=1245)  
 5'-half & exclusive (n=5)  
 5' terminus relative to 5' end of the tRNA (n=5)



COAD (n=1245)  
 5'-half & exclusive (n=5)  
 5' terminus relative to 5' end of the tRNA (n=5)

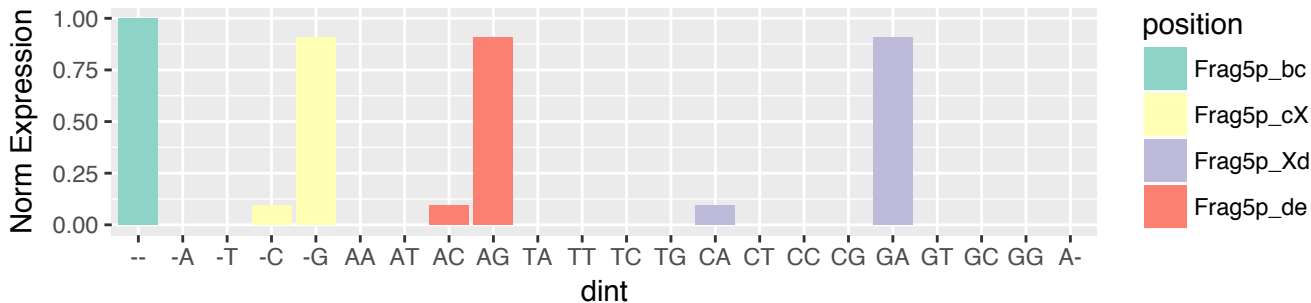

COAD (n=1245)  
 5'-half & exclusive (n=5)  
 3' terminus relative to 5' stem of A-loop (n=5)

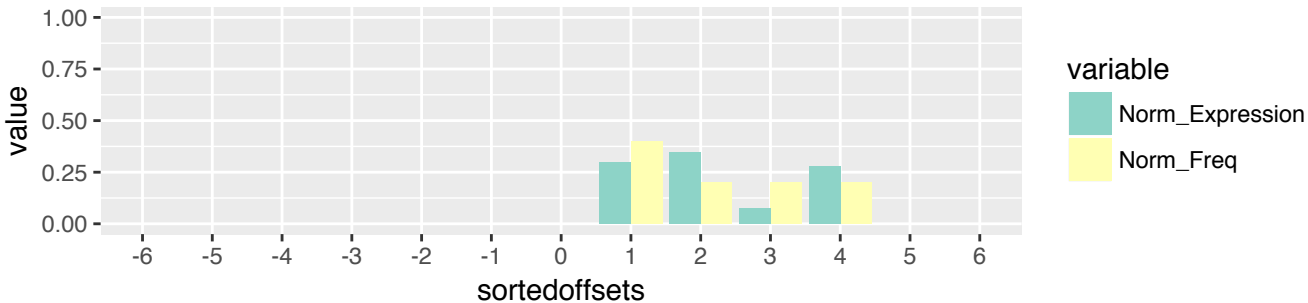

COAD (n=1245)  
 5'-half & exclusive (n=5)  
 3' terminus relative to 5' stem of A-loop (n=5)

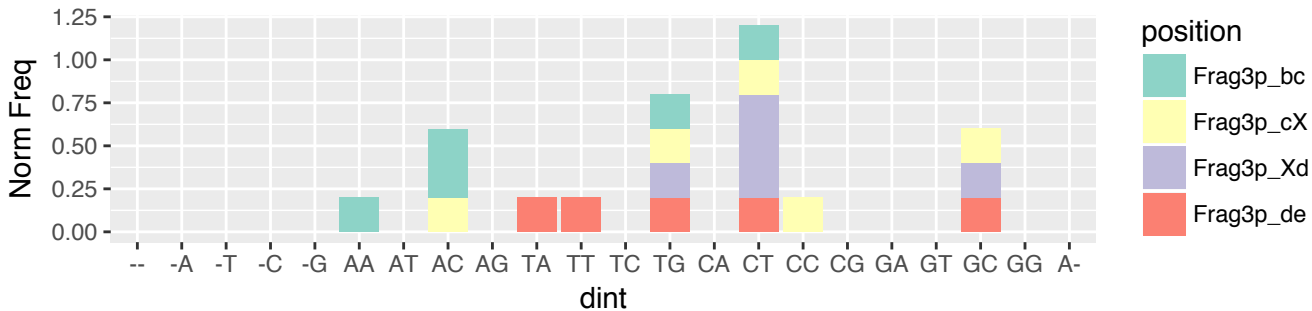

COAD (n=1245)  
 5'-half & exclusive (n=5)  
 3' terminus relative to 5' stem of A-loop (n=5)

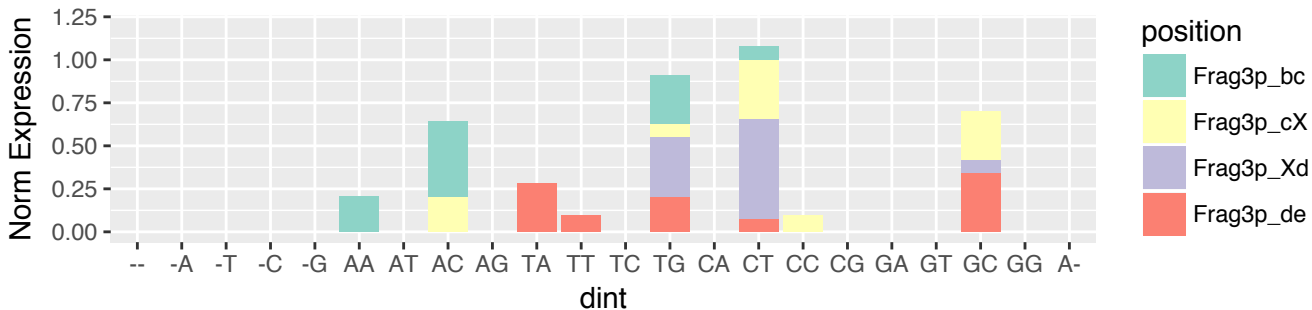

COAD (n=1245)  
 5'-tRF & exclusive (n=177)  
 5' terminus relative to 5' end of the tRNA (n=177)

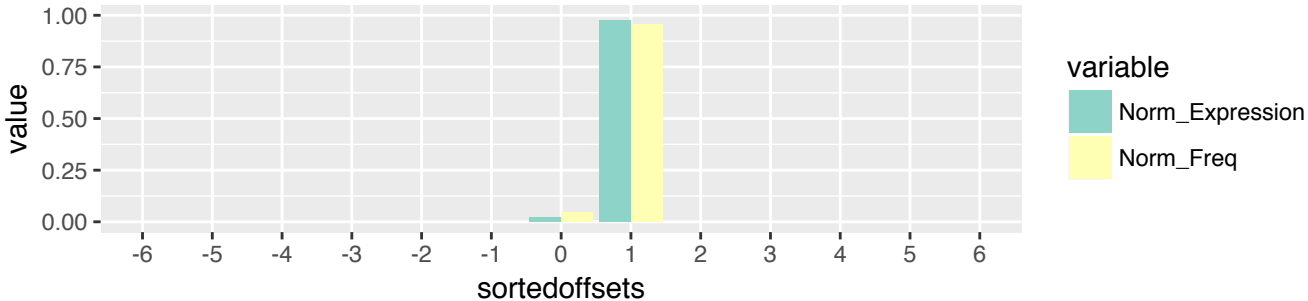

COAD (n=1245)  
 5'-tRF & exclusive (n=177)  
 5' terminus relative to 5' end of the tRNA (n=177)

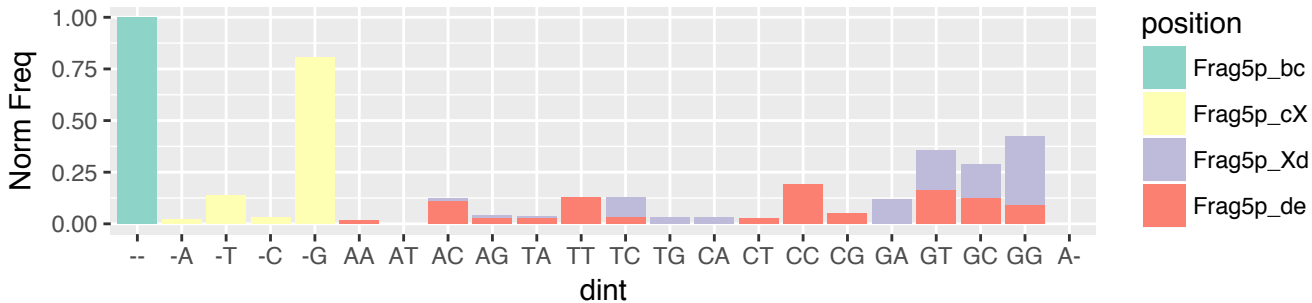

COAD (n=1245)  
 5'-tRF & exclusive (n=177)  
 5' terminus relative to 5' end of the tRNA (n=177)

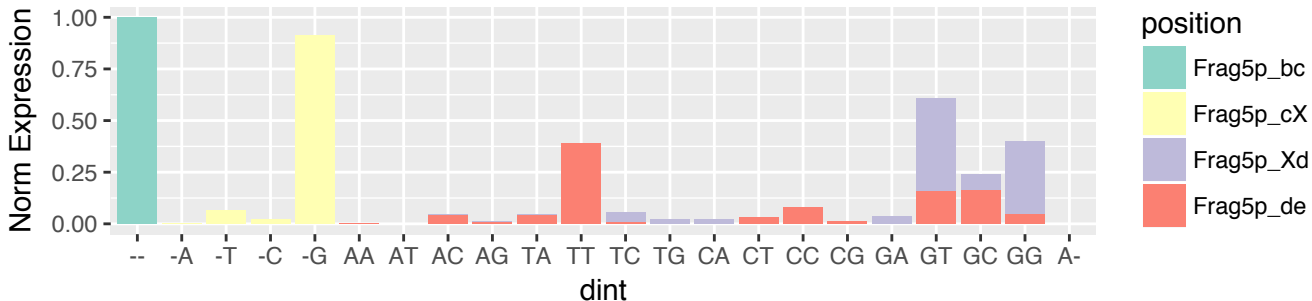



COAD (n=1245)  
5'-tRF & exclusive (n=177)  
3' terminus relative to 5' stem of D-loop (n=17)

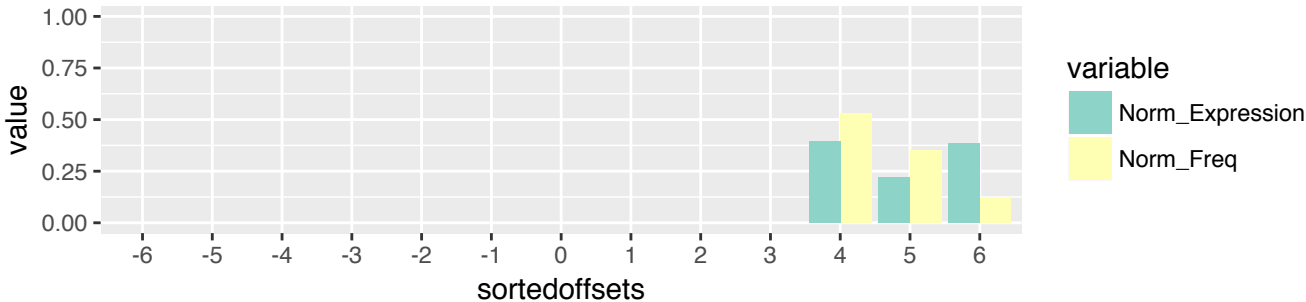

COAD (n=1245)  
5'-tRF & exclusive (n=177)  
3' terminus relative to 5' stem of D-loop (n=17)

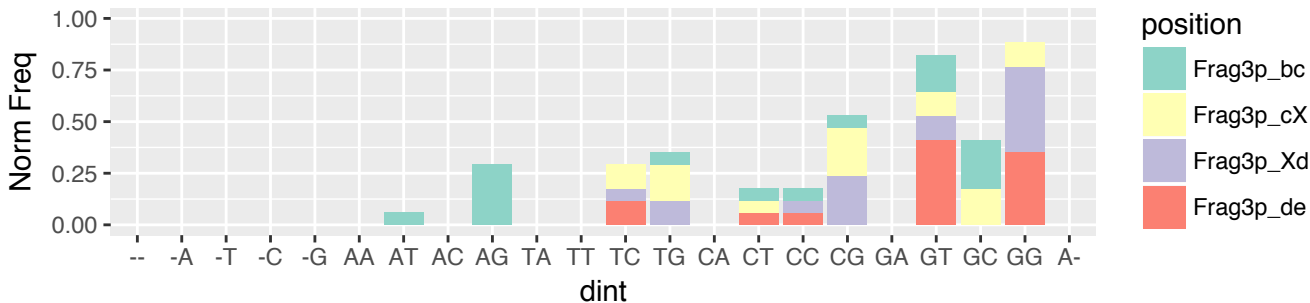

COAD (n=1245)  
5'-tRF & exclusive (n=177)  
3' terminus relative to 5' stem of D-loop (n=17)

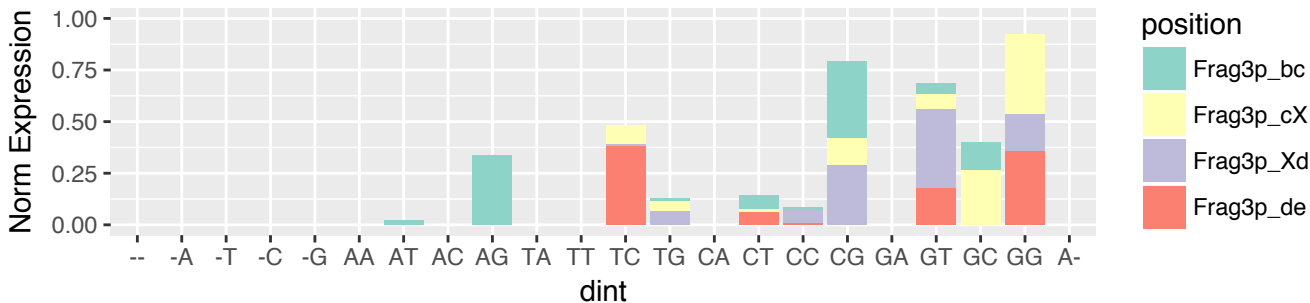

COAD (n=1245)  
 5'-tRF & exclusive (n=177)  
 3' terminus relative to 3' stem of D-loop (n=150)

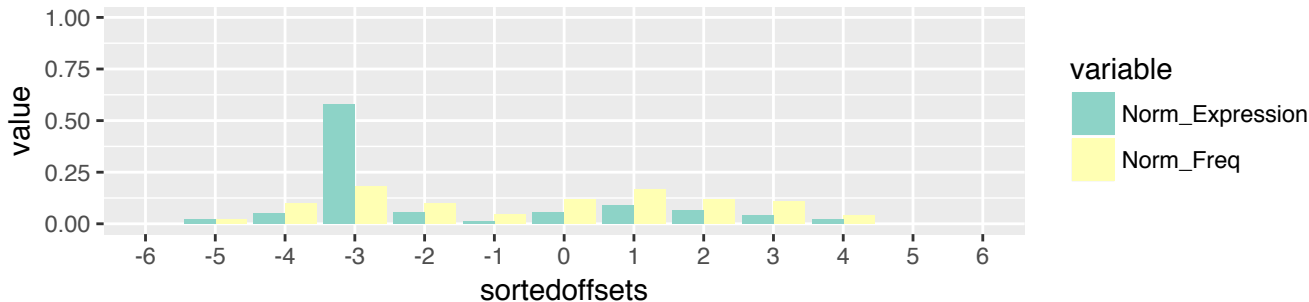

COAD (n=1245)  
 5'-tRF & exclusive (n=177)  
 3' terminus relative to 3' stem of D-loop (n=150)

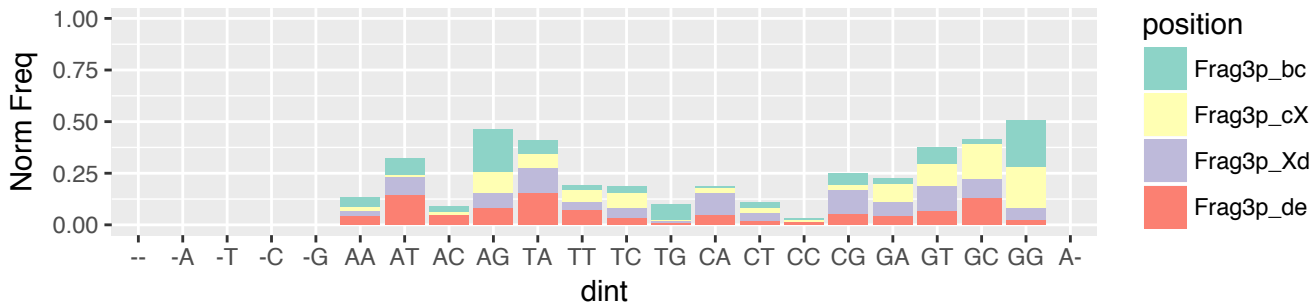

COAD (n=1245)  
 5'-tRF & exclusive (n=177)  
 3' terminus relative to 3' stem of D-loop (n=150)

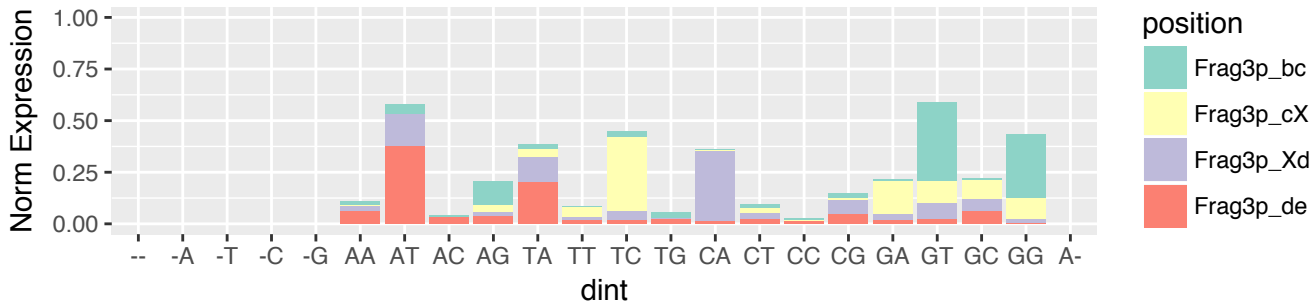

COAD (n=1245)  
 5'-tRF & exclusive (n=177)  
 3' terminus relative to 5' stem of A-loop (n=6)

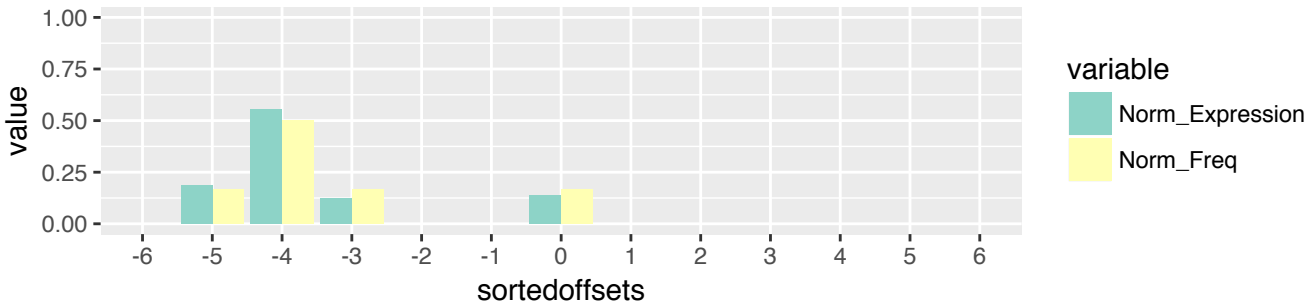

COAD (n=1245)  
 5'-tRF & exclusive (n=177)  
 3' terminus relative to 5' stem of A-loop (n=6)

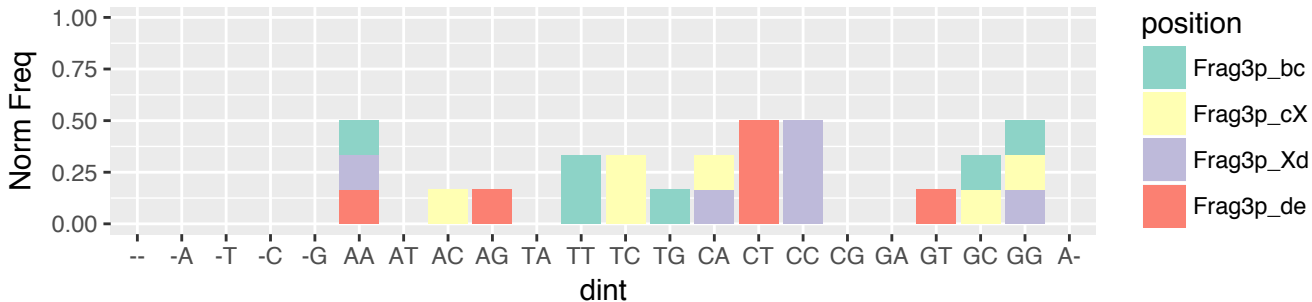

COAD (n=1245)  
 5'-tRF & exclusive (n=177)  
 3' terminus relative to 5' stem of A-loop (n=6)

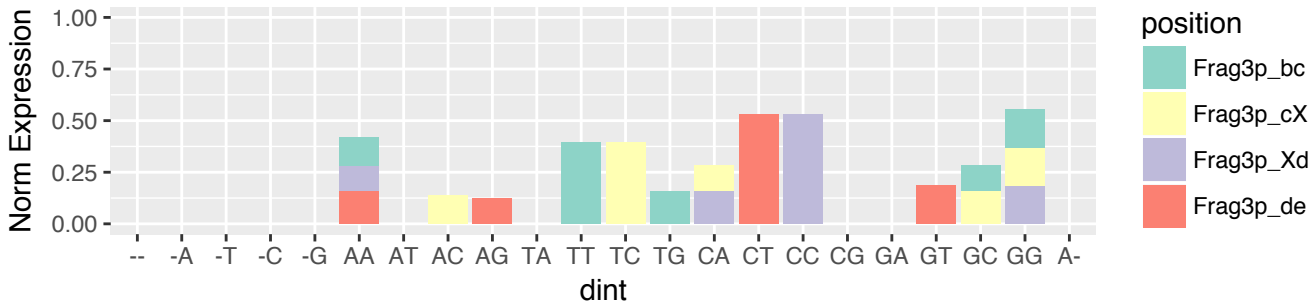

COAD (n=1245)  
 5'-tRF & exclusive (n=177)  
 3' terminus relative to 3' stem of A-loop (n=4)

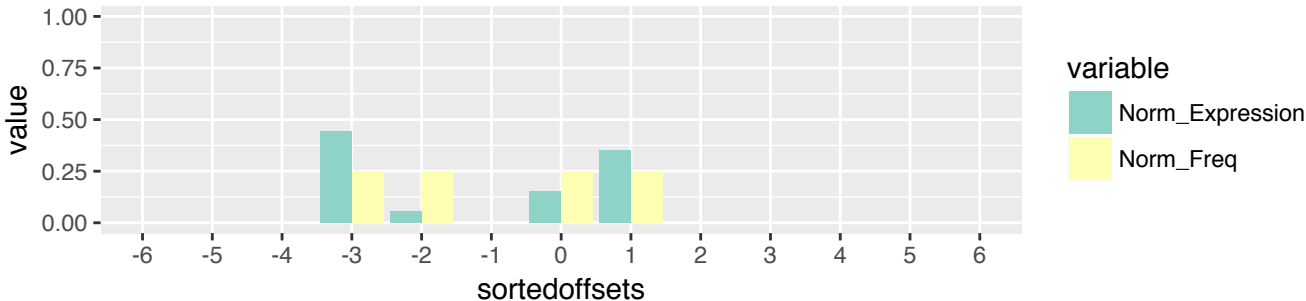

COAD (n=1245)  
 5'-tRF & exclusive (n=177)  
 3' terminus relative to 3' stem of A-loop (n=4)

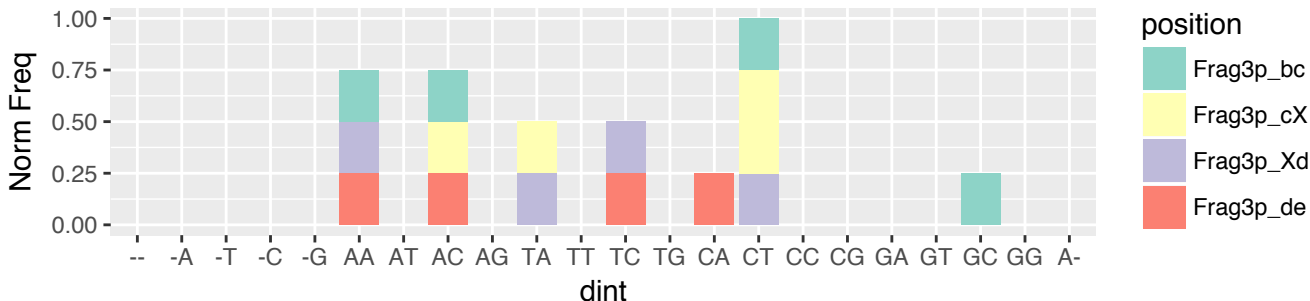

COAD (n=1245)  
 5'-tRF & exclusive (n=177)  
 3' terminus relative to 3' stem of A-loop (n=4)

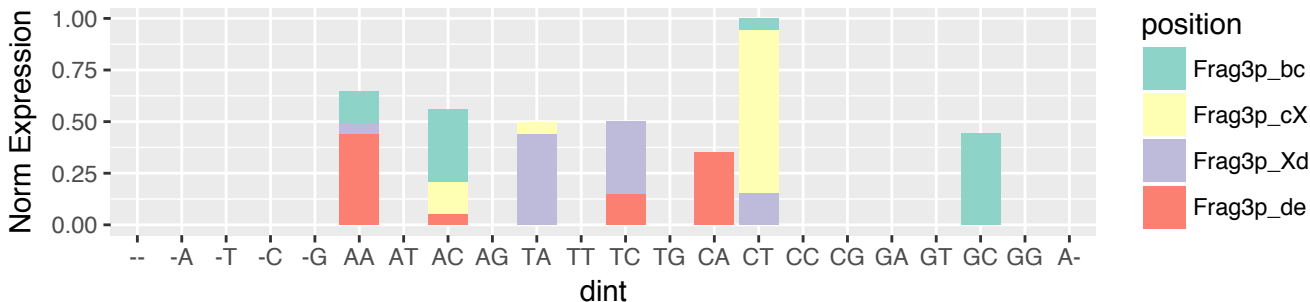

COAD (n=1245)  
 i-tRF & exclusive (n=252)  
 5' terminus relative to 5' end of the tRNA (n=9)

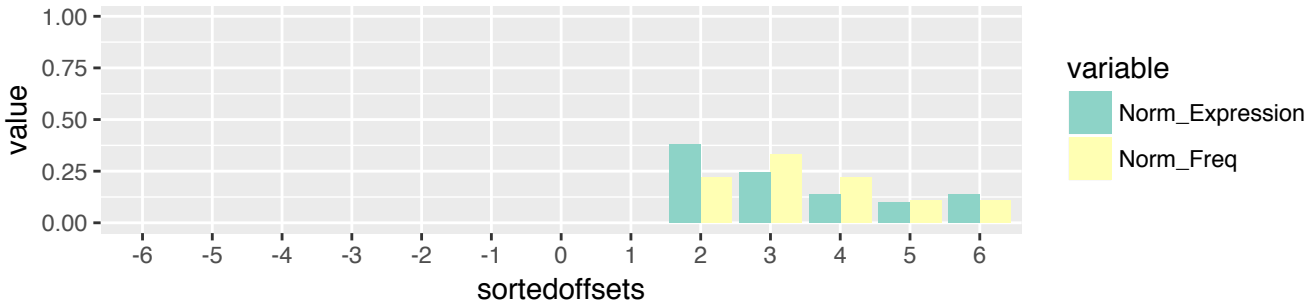

COAD (n=1245)  
 i-tRF & exclusive (n=252)  
 5' terminus relative to 5' end of the tRNA (n=9)

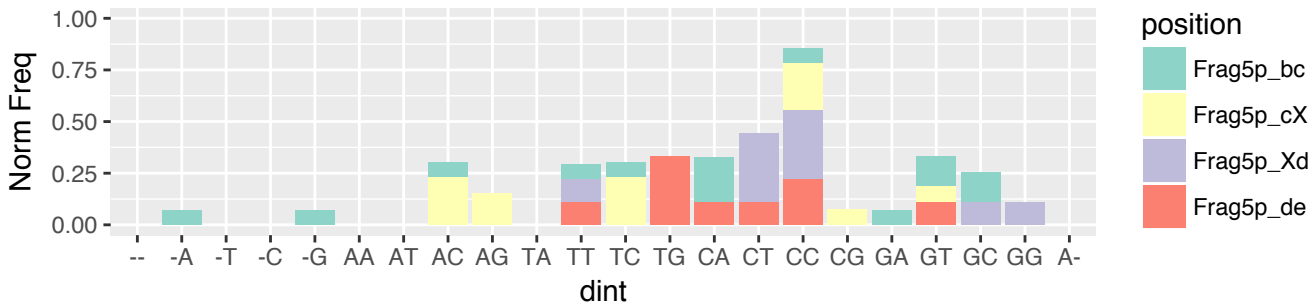

COAD (n=1245)  
 i-tRF & exclusive (n=252)  
 5' terminus relative to 5' end of the tRNA (n=9)

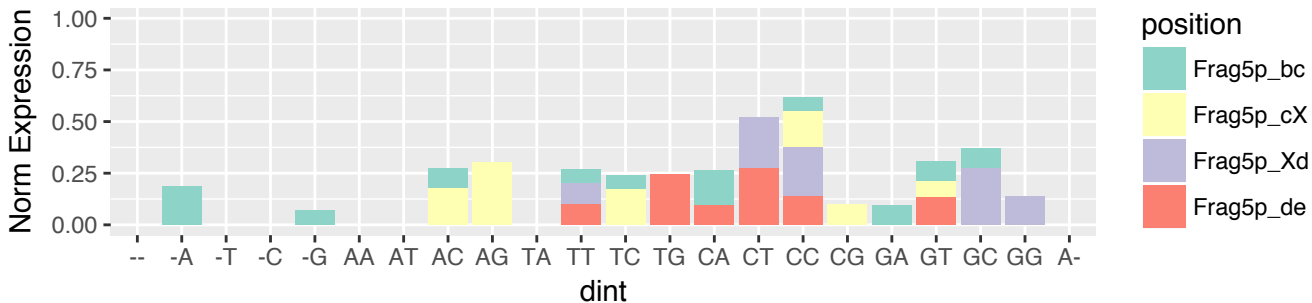

COAD (n=1245)  
i-tRF & exclusive (n=252)  
5' terminus relative to 5' stem of D-loop (n=84)

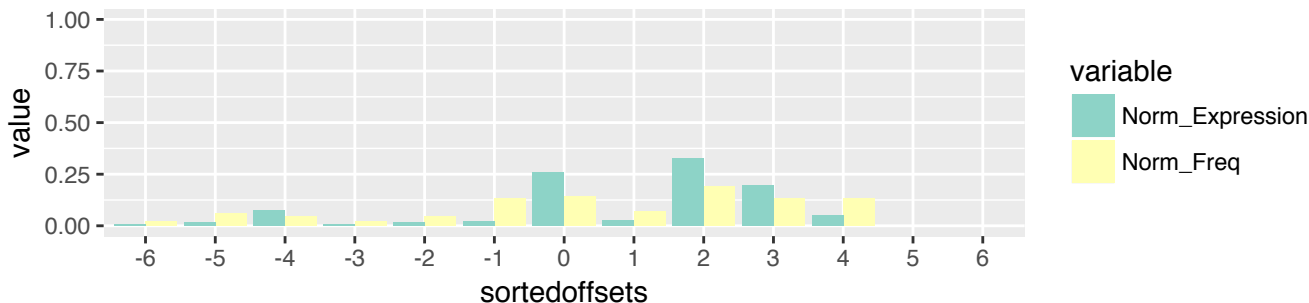

COAD (n=1245)  
i-tRF & exclusive (n=252)  
5' terminus relative to 5' stem of D-loop (n=84)

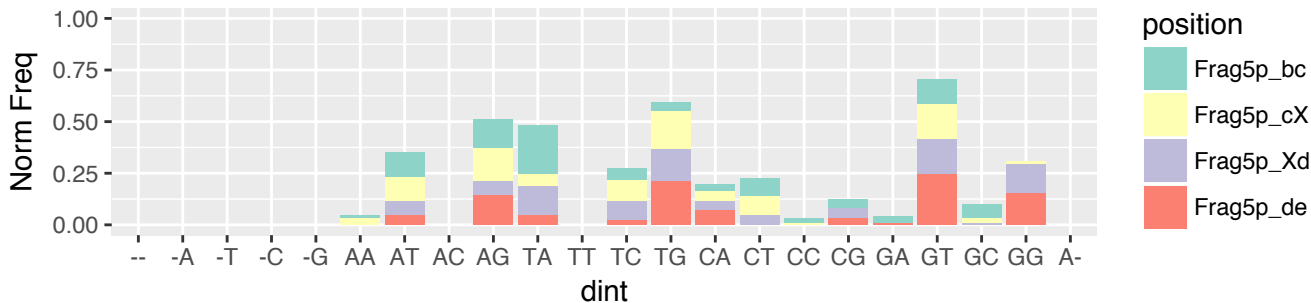

COAD (n=1245)  
i-tRF & exclusive (n=252)  
5' terminus relative to 5' stem of D-loop (n=84)

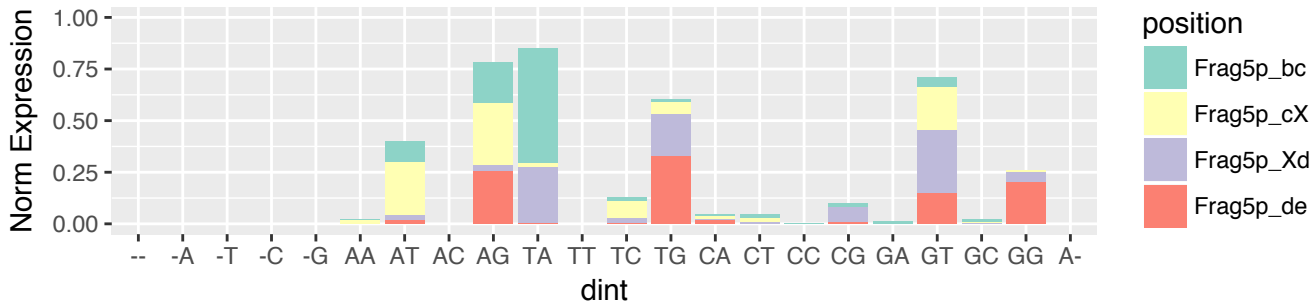

COAD (n=1245)  
i-tRF & exclusive (n=252)  
5' terminus relative to 3' stem of D-loop (n=7)

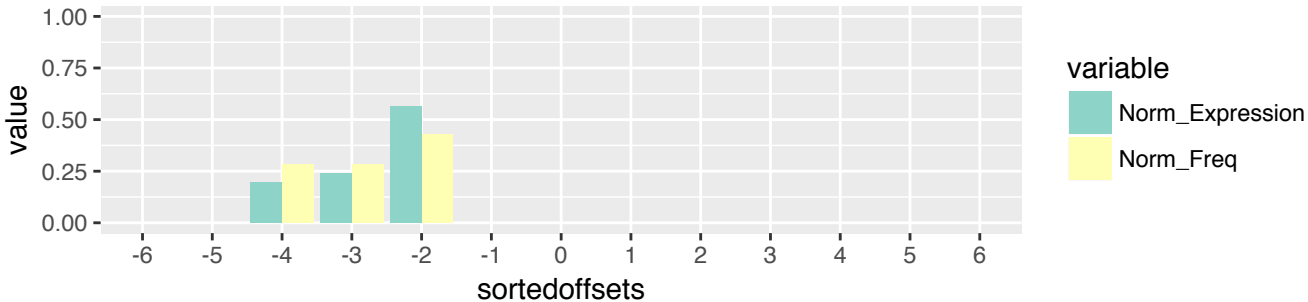

COAD (n=1245)  
i-tRF & exclusive (n=252)  
5' terminus relative to 3' stem of D-loop (n=7)

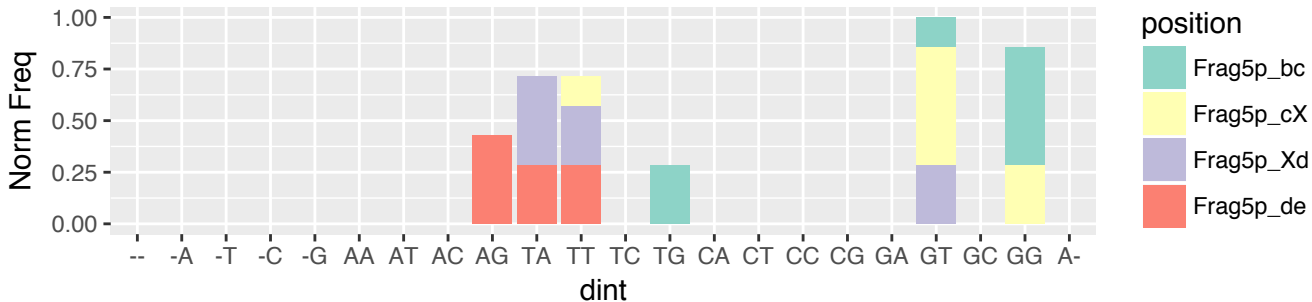

COAD (n=1245)  
i-tRF & exclusive (n=252)  
5' terminus relative to 3' stem of D-loop (n=7)

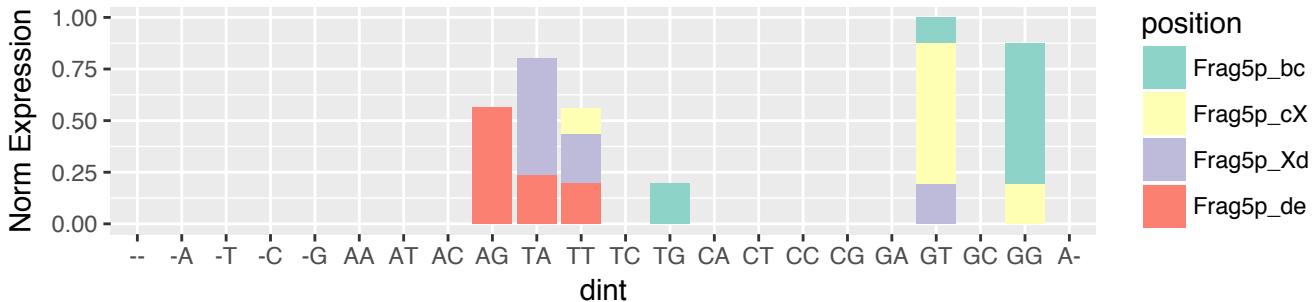

COAD (n=1245)  
 i-tRF & exclusive (n=252)  
 5' terminus relative to 5' stem of A-loop (n=57)

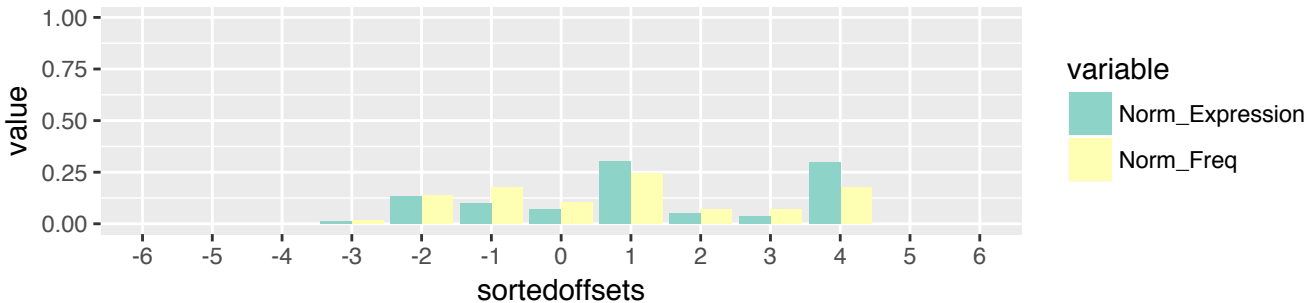

COAD (n=1245)  
 i-tRF & exclusive (n=252)  
 5' terminus relative to 5' stem of A-loop (n=57)

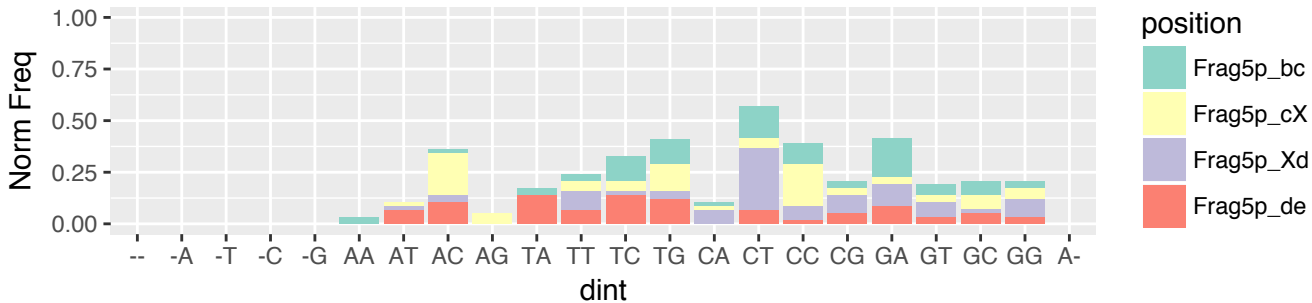

COAD (n=1245)  
 i-tRF & exclusive (n=252)  
 5' terminus relative to 5' stem of A-loop (n=57)

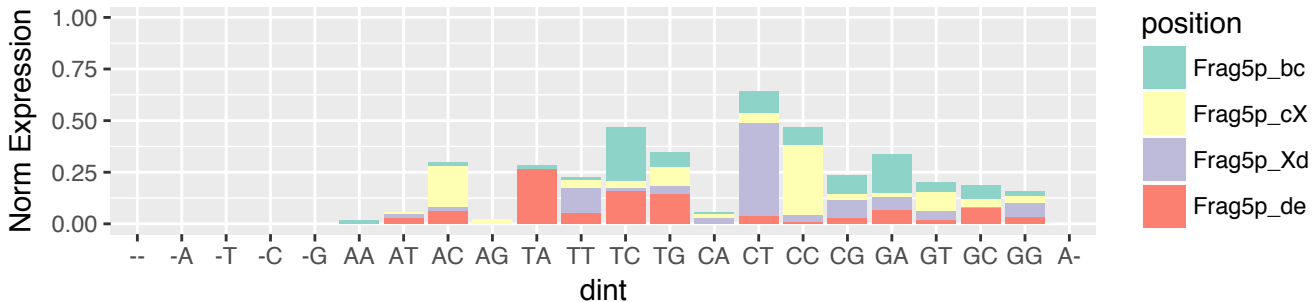



COAD (n=1245)  
 i-tRF & exclusive (n=252)  
 5' terminus relative to 3' stem of A-loop (n=62)

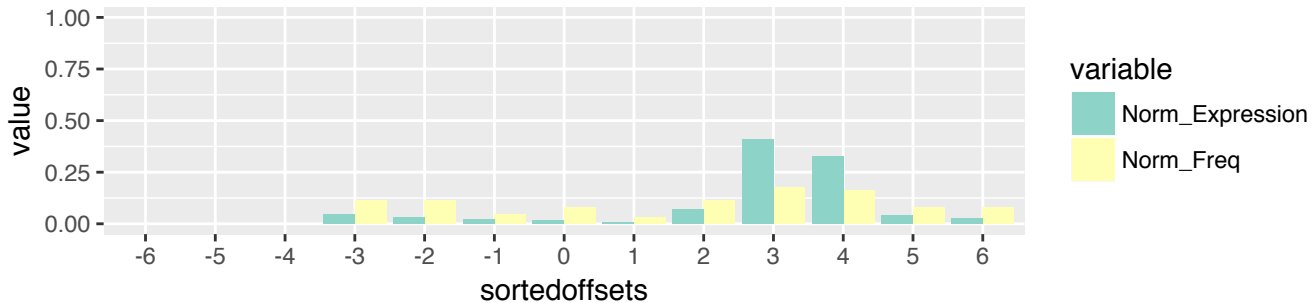

COAD (n=1245)  
 i-tRF & exclusive (n=252)  
 5' terminus relative to 3' stem of A-loop (n=62)

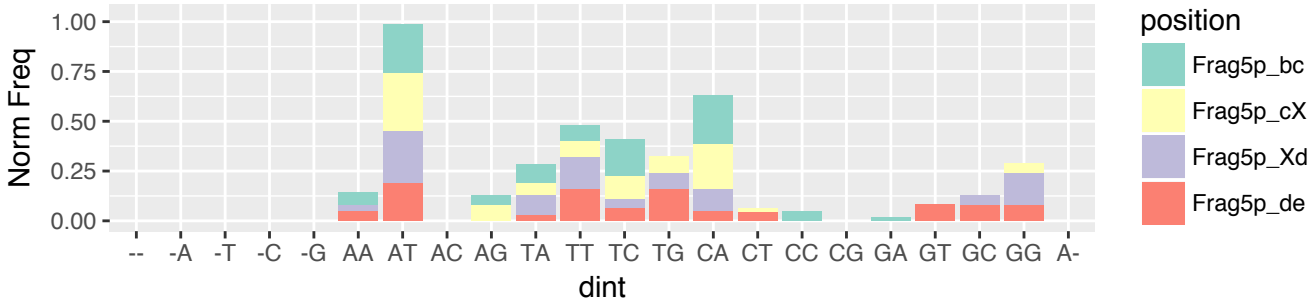

COAD (n=1245)  
 i-tRF & exclusive (n=252)  
 5' terminus relative to 3' stem of A-loop (n=62)

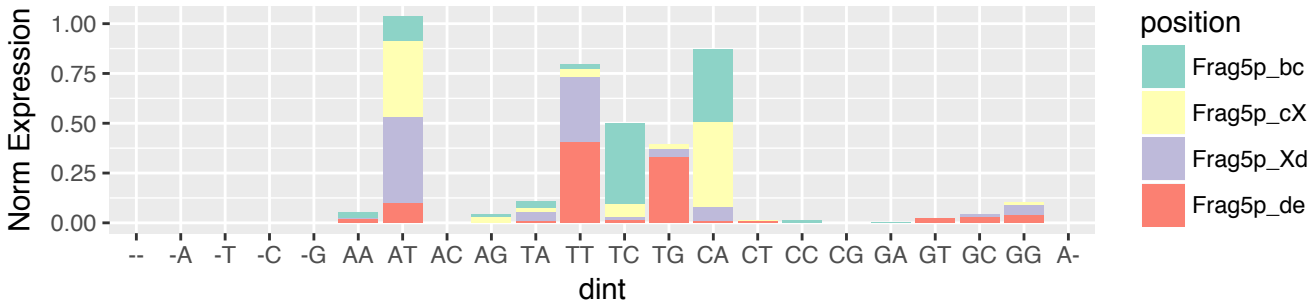

COAD (n=1245)  
i-tRF & exclusive (n=252)  
5' terminus relative to 5' stem of T-loop (n=33)

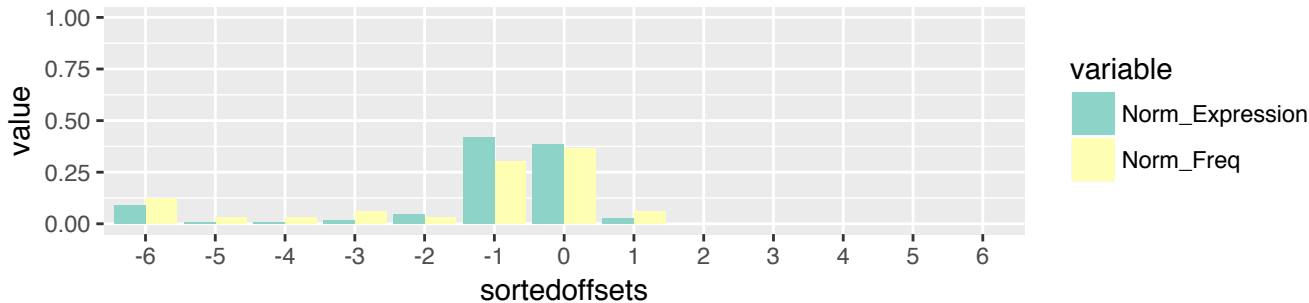

COAD (n=1245)  
i-tRF & exclusive (n=252)  
5' terminus relative to 5' stem of T-loop (n=33)

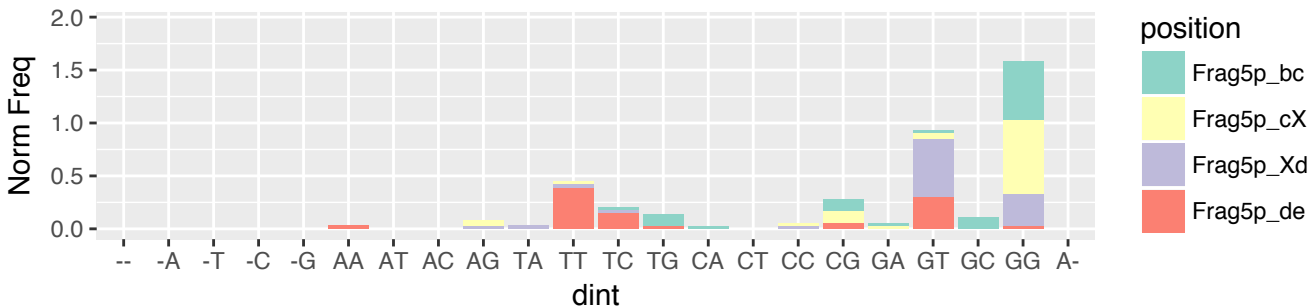

COAD (n=1245)  
i-tRF & exclusive (n=252)  
5' terminus relative to 5' stem of T-loop (n=33)

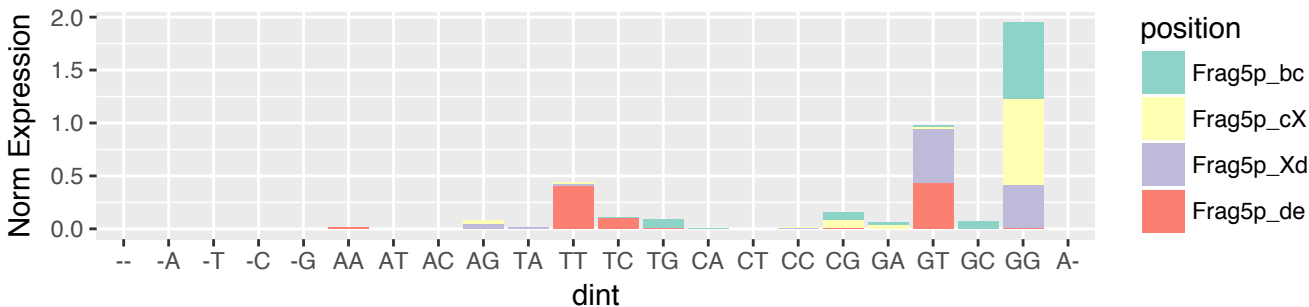

COAD (n=1245)  
 i-tRF & exclusive (n=252)  
 3' terminus relative to 3' stem of D-loop (n=4)

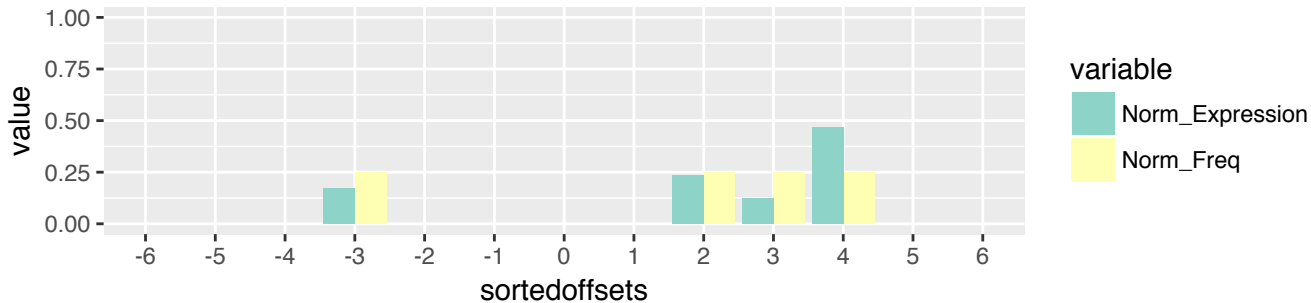

COAD (n=1245)  
 i-tRF & exclusive (n=252)  
 3' terminus relative to 3' stem of D-loop (n=4)

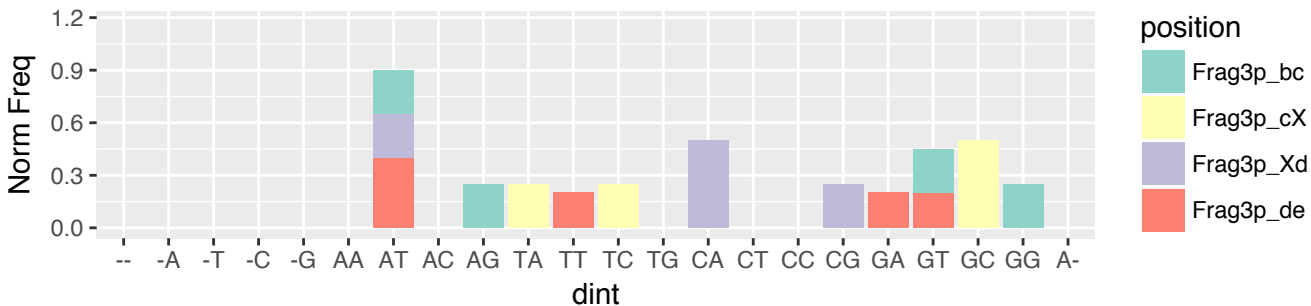

COAD (n=1245)  
 i-tRF & exclusive (n=252)  
 3' terminus relative to 3' stem of D-loop (n=4)

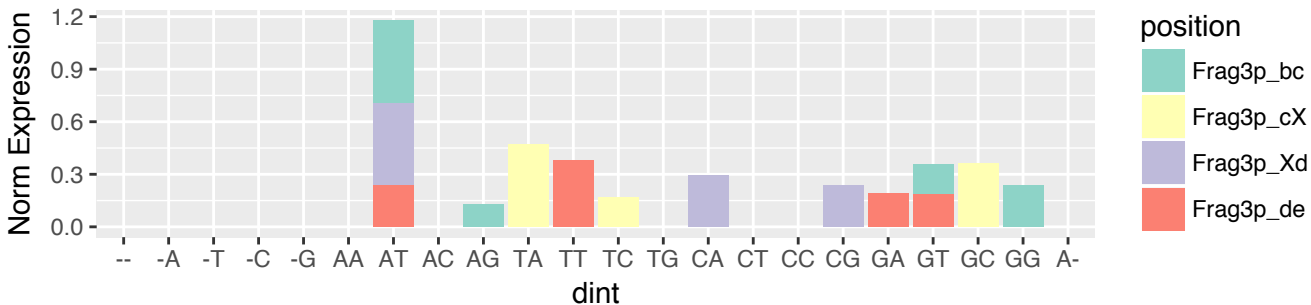

COAD (n=1245)  
i-tRF & exclusive (n=252)  
3' terminus relative to 5' stem of A-loop (n=72)

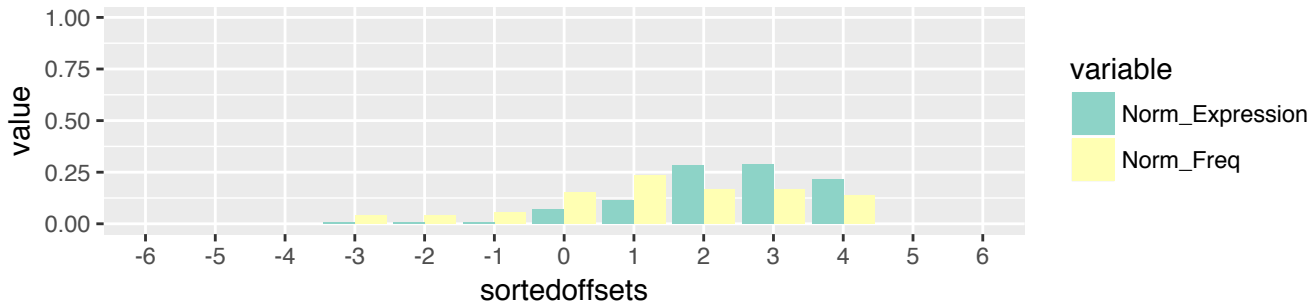

COAD (n=1245)  
i-tRF & exclusive (n=252)  
3' terminus relative to 5' stem of A-loop (n=72)

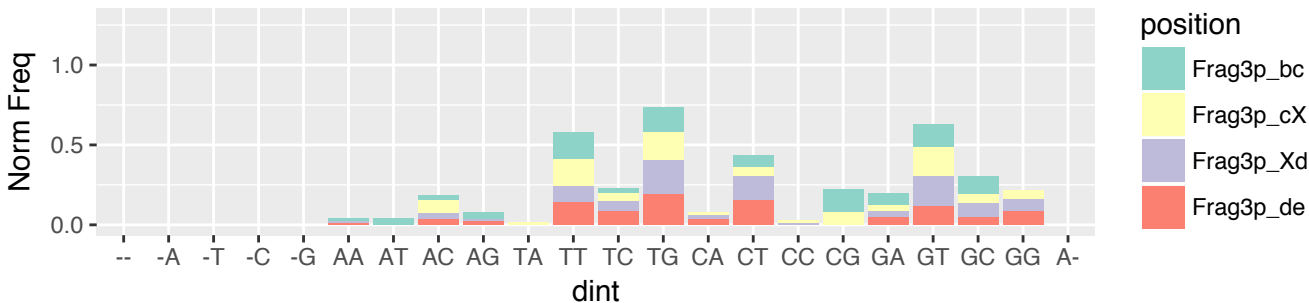

COAD (n=1245)  
i-tRF & exclusive (n=252)  
3' terminus relative to 5' stem of A-loop (n=72)

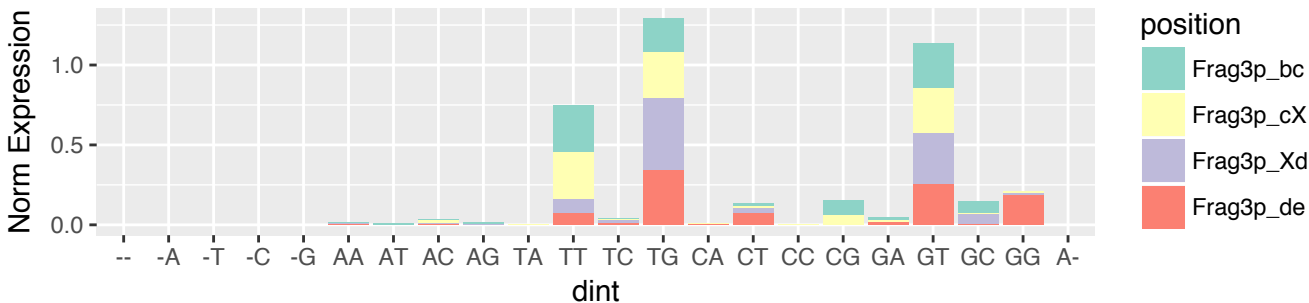

COAD (n=1245)  
 i-tRF & exclusive (n=252)  
 3' terminus relative to 3' stem of A-loop (n=34)

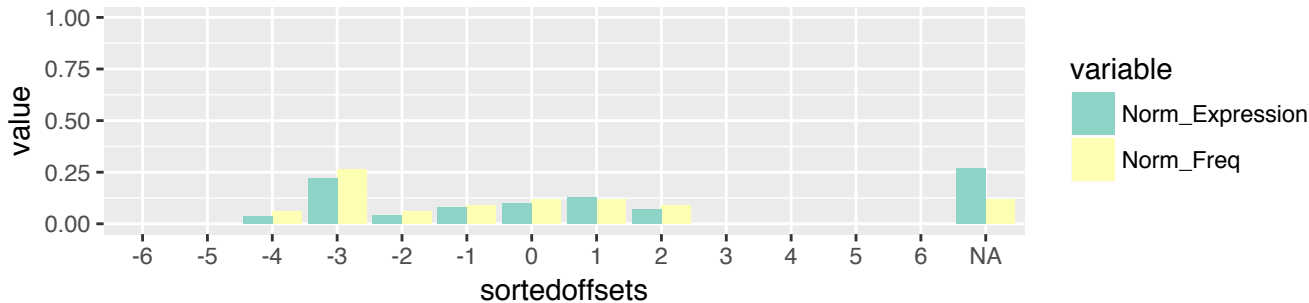

COAD (n=1245)  
 i-tRF & exclusive (n=252)  
 3' terminus relative to 3' stem of A-loop (n=34)

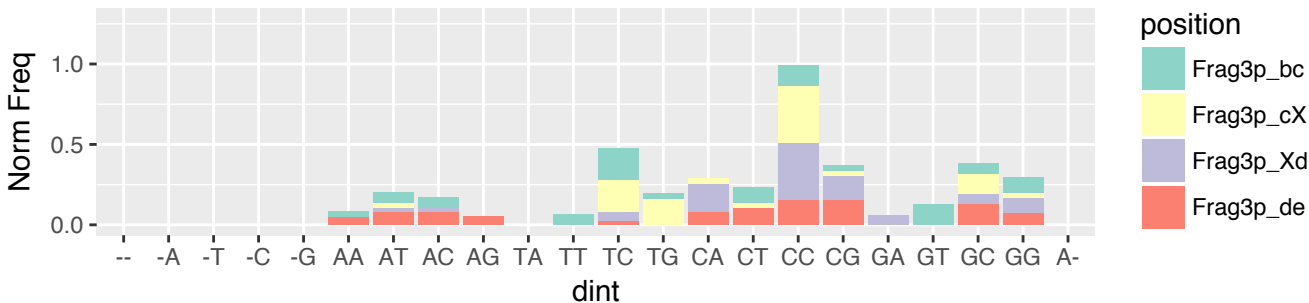

COAD (n=1245)  
 i-tRF & exclusive (n=252)  
 3' terminus relative to 3' stem of A-loop (n=34)

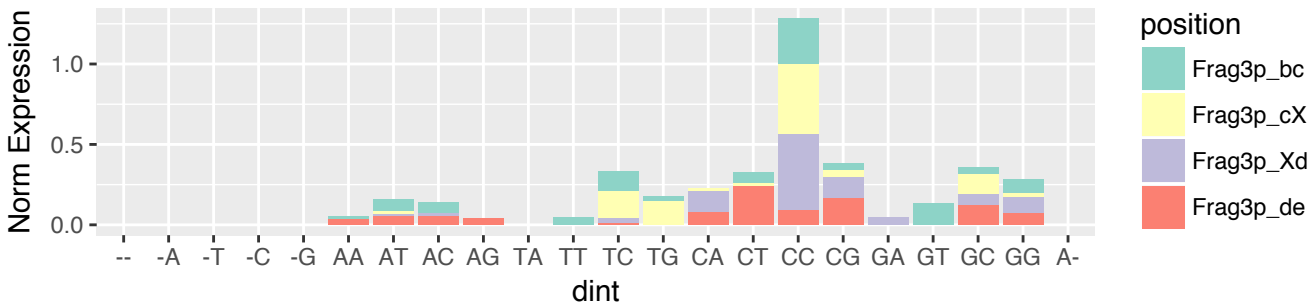

COAD (n=1245)  
 i-tRF & exclusive (n=252)  
 3' terminus relative to 5' stem of T-loop (n=59)

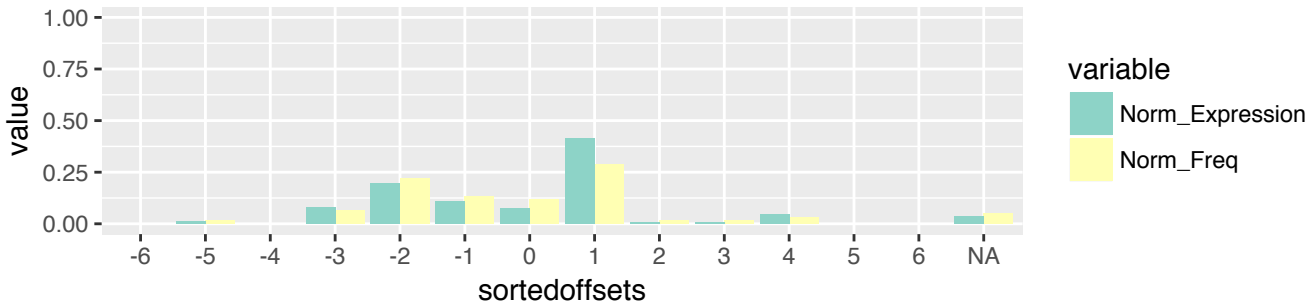

COAD (n=1245)  
 i-tRF & exclusive (n=252)  
 3' terminus relative to 5' stem of T-loop (n=59)

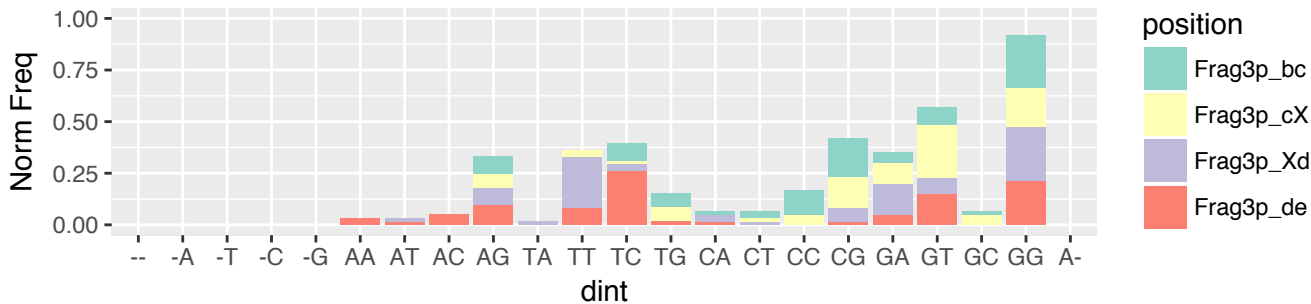

COAD (n=1245)  
 i-tRF & exclusive (n=252)  
 3' terminus relative to 5' stem of T-loop (n=59)

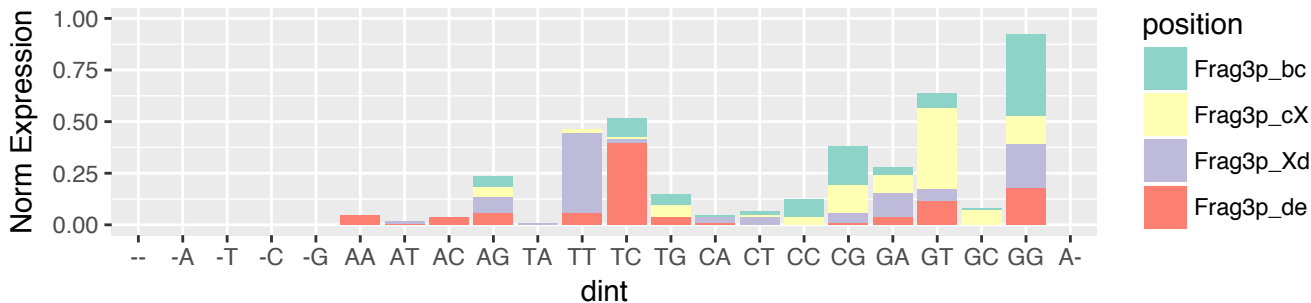

COAD (n=1245)  
i-tRF & exclusive (n=252)  
3' terminus relative to 3' stem of T-loop (n=49)

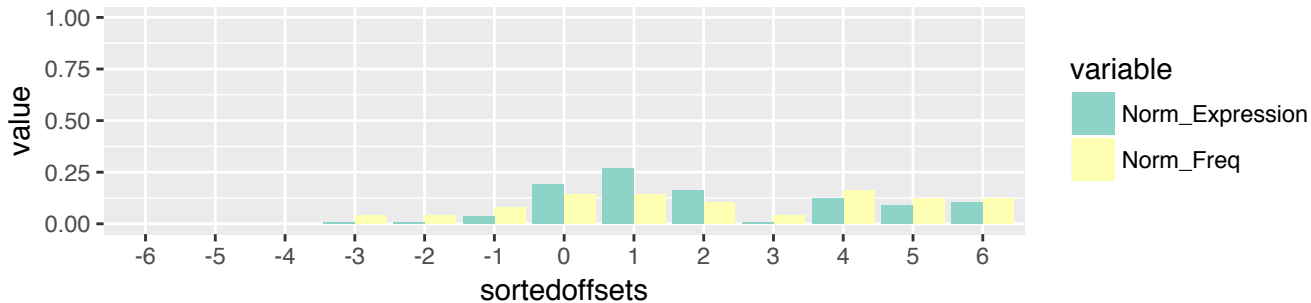

COAD (n=1245)  
i-tRF & exclusive (n=252)  
3' terminus relative to 3' stem of T-loop (n=49)

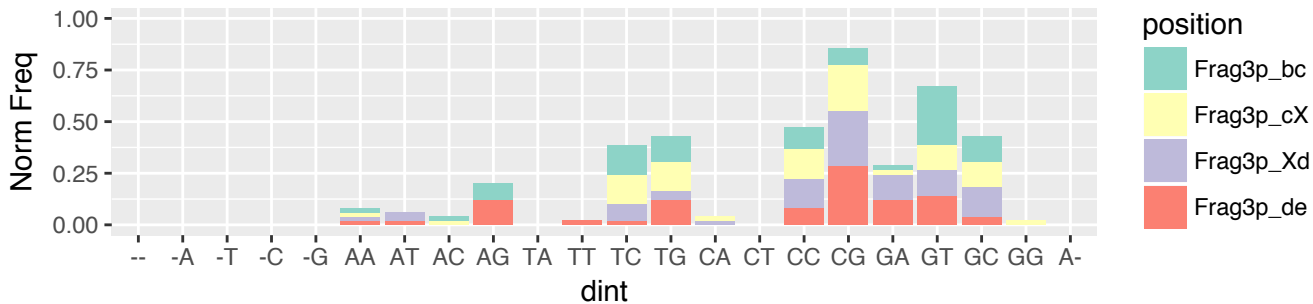

COAD (n=1245)  
i-tRF & exclusive (n=252)  
3' terminus relative to 3' stem of T-loop (n=49)

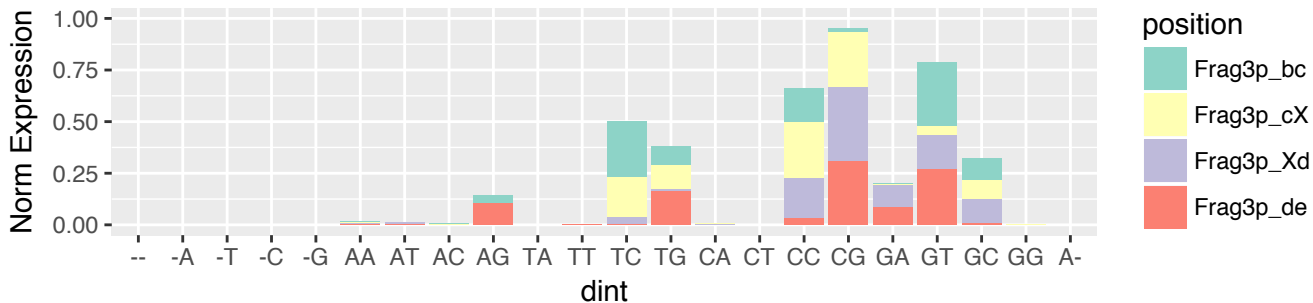

COAD (n=1245)  
 i-tRF & exclusive (n=252)  
 3' terminus relative to 3' end of the tRNA (n=37)

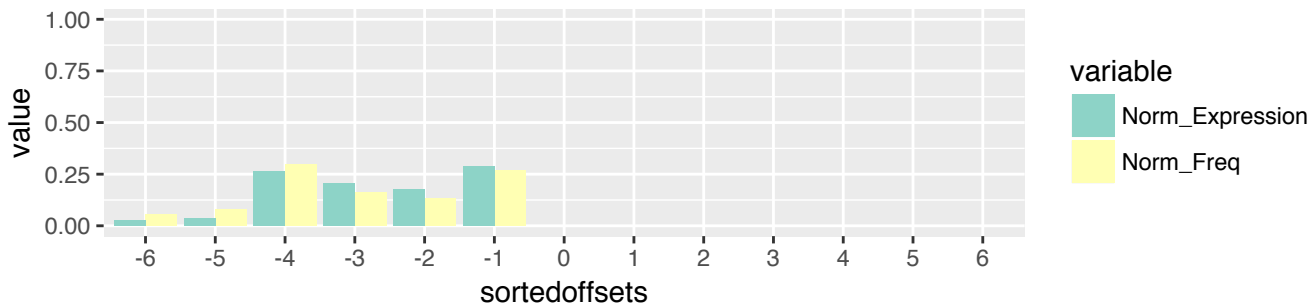

COAD (n=1245)  
 i-tRF & exclusive (n=252)  
 3' terminus relative to 3' end of the tRNA (n=37)

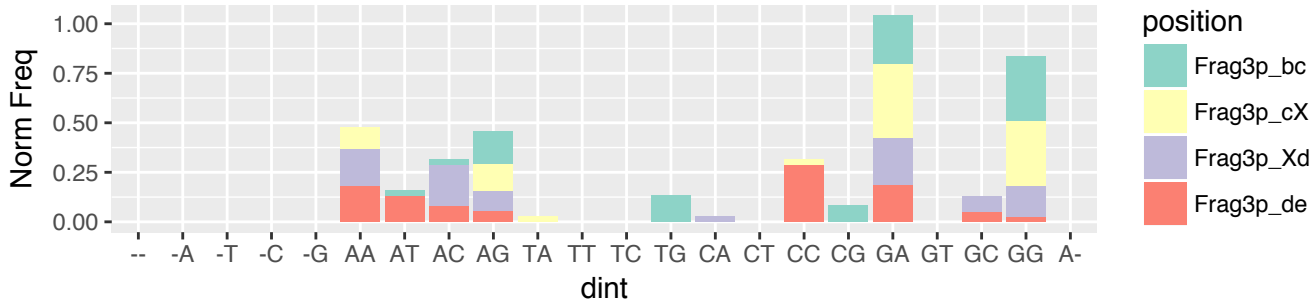

COAD (n=1245)  
 i-tRF & exclusive (n=252)  
 3' terminus relative to 3' end of the tRNA (n=37)

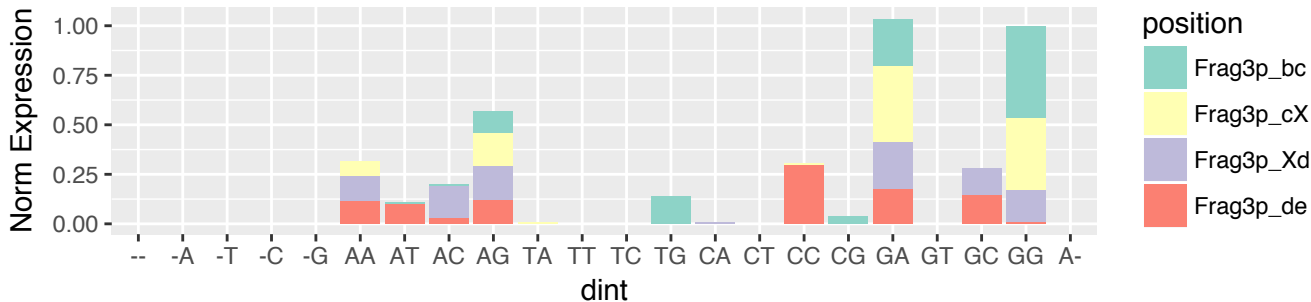



COAD (n=1245)  
 3'-tRF & exclusive (n=230)  
 5' terminus relative to 5' stem of T-loop (n=148)

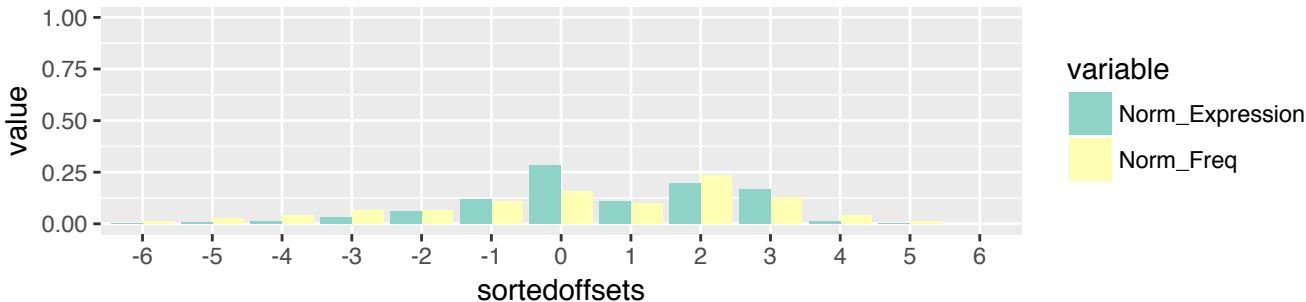

COAD (n=1245)  
 3'-tRF & exclusive (n=230)  
 5' terminus relative to 5' stem of T-loop (n=148)

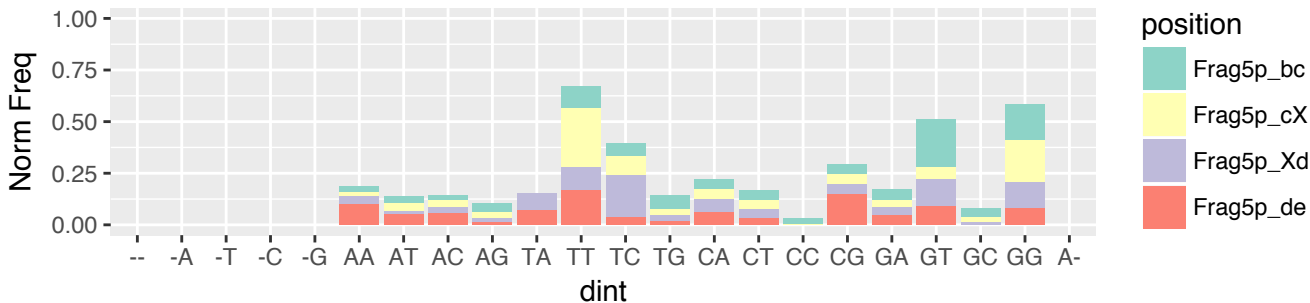

COAD (n=1245)  
 3'-tRF & exclusive (n=230)  
 5' terminus relative to 5' stem of T-loop (n=148)

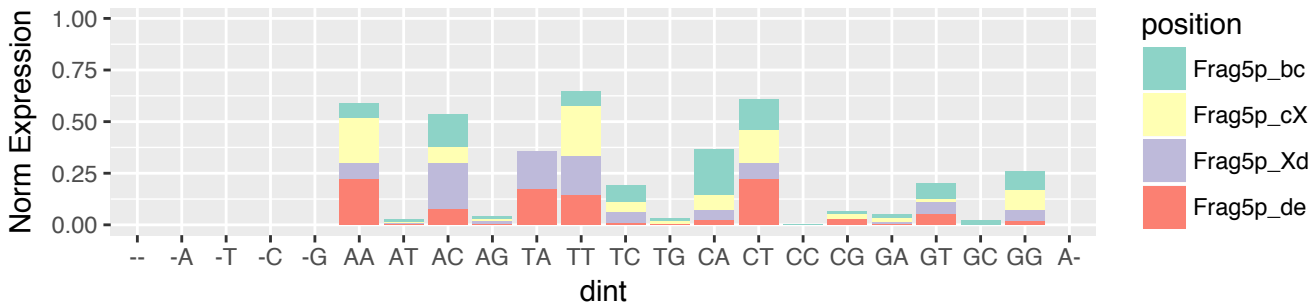

COAD (n=1245)  
 3'-tRF & exclusive (n=230)  
 5' terminus relative to 3' stem of T-loop (n=82)

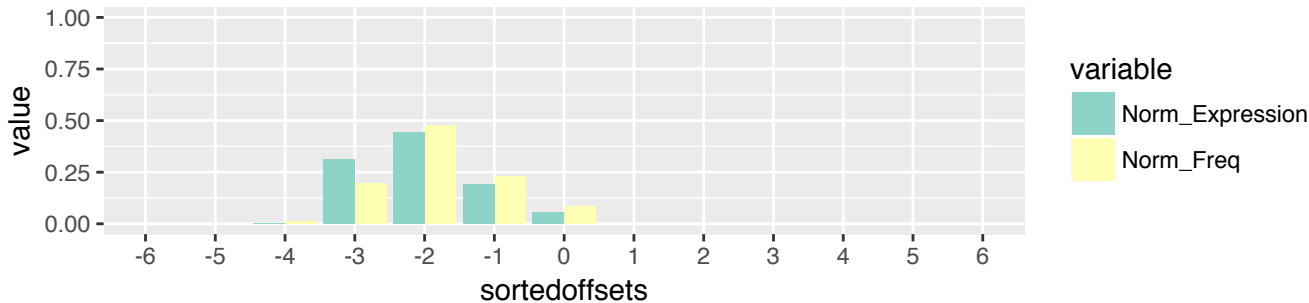

COAD (n=1245)  
 3'-tRF & exclusive (n=230)  
 5' terminus relative to 3' stem of T-loop (n=82)

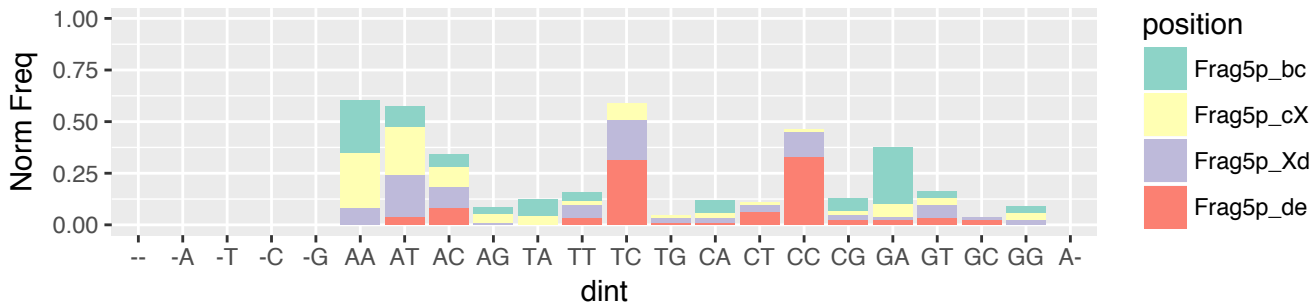

COAD (n=1245)  
 3'-tRF & exclusive (n=230)  
 5' terminus relative to 3' stem of T-loop (n=82)

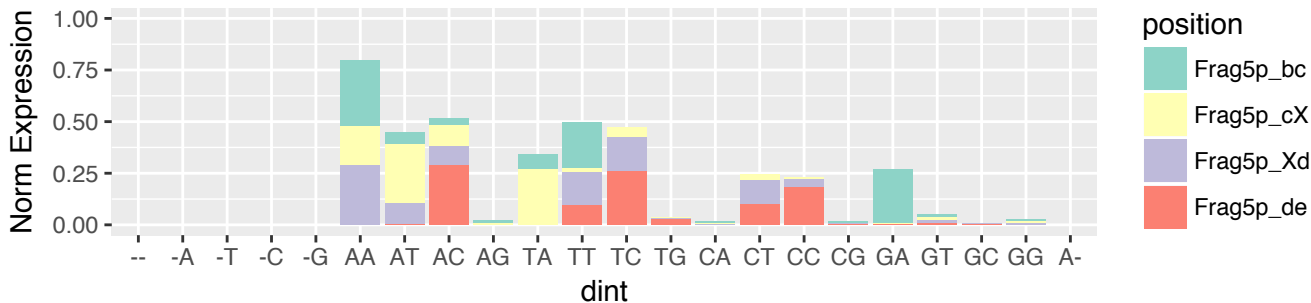

COAD (n=1245)  
3'-tRF & exclusive (n=230)  
3' terminus relative to 3' end of the tRNA (n=230)

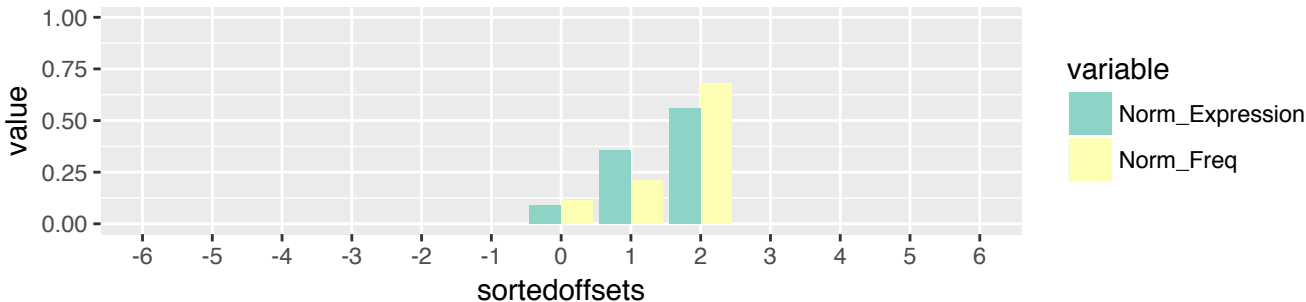

COAD (n=1245)  
3'-tRF & exclusive (n=230)  
3' terminus relative to 3' end of the tRNA (n=230)

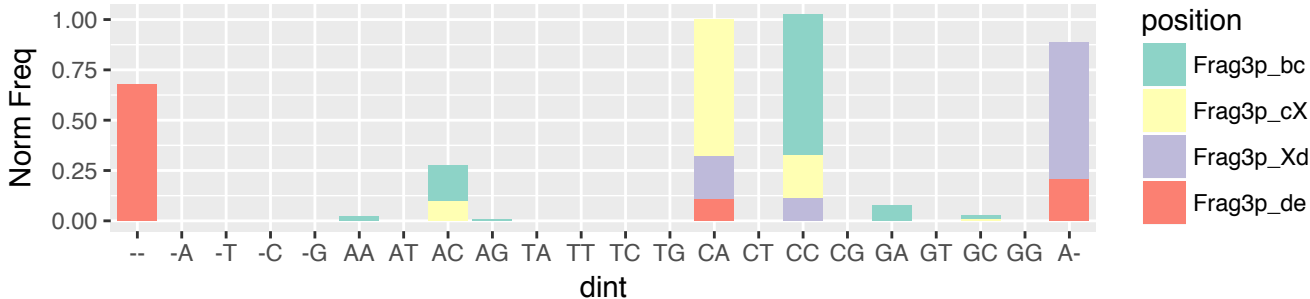

COAD (n=1245)  
3'-tRF & exclusive (n=230)  
3' terminus relative to 3' end of the tRNA (n=230)

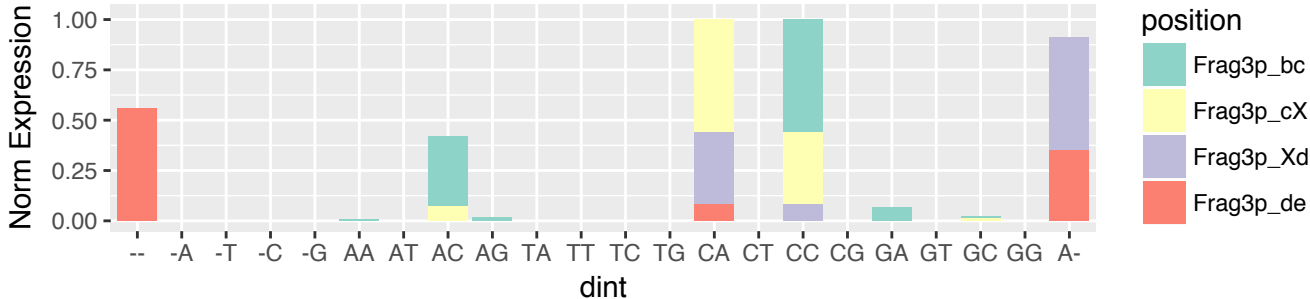

DLBC (n=1189)  
5'-half & exclusive (n=5)  
5' terminus relative to 5' end of the tRNA (n=5)



DLBC (n=1189)  
5'-half & exclusive (n=5)  
5' terminus relative to 5' end of the tRNA (n=5)

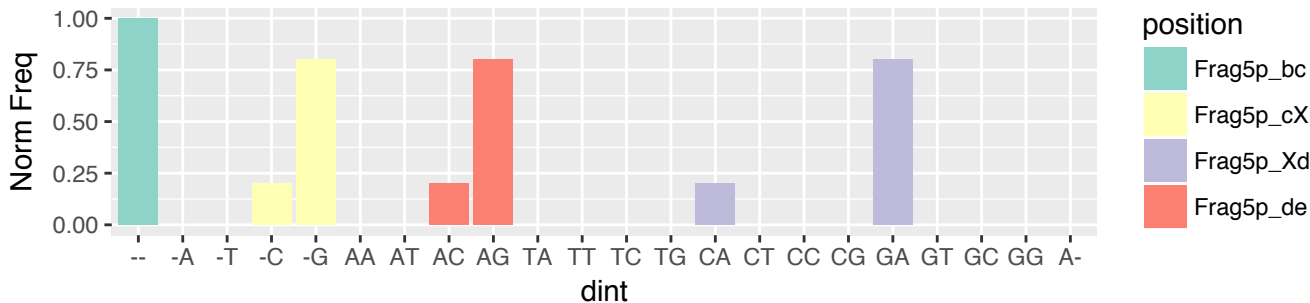

DLBC (n=1189)  
5'-half & exclusive (n=5)  
5' terminus relative to 5' end of the tRNA (n=5)

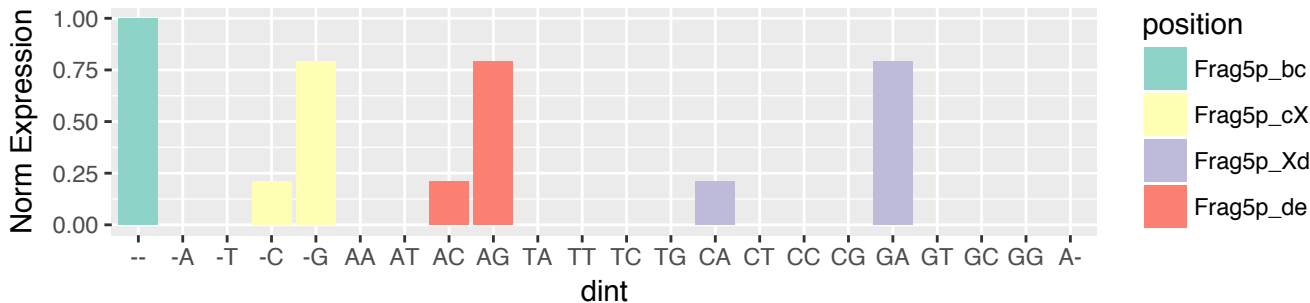

DLBC (n=1189)  
 5'-half & exclusive (n=5)  
 3' terminus relative to 5' stem of A-loop (n=5)

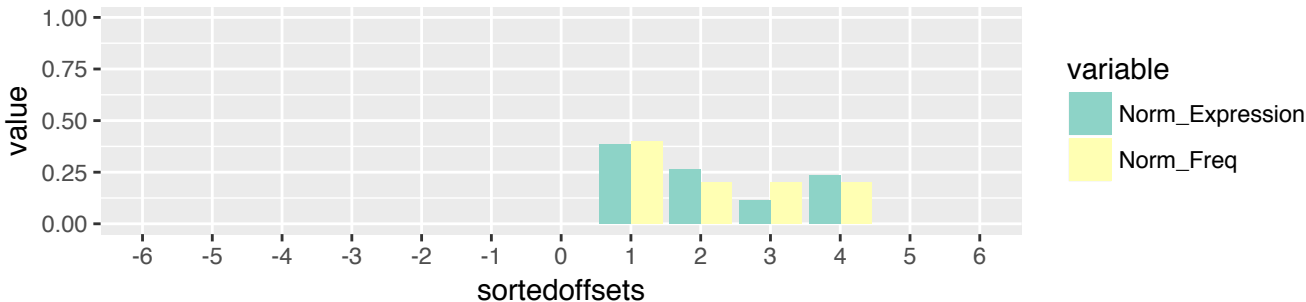

DLBC (n=1189)  
 5'-half & exclusive (n=5)  
 3' terminus relative to 5' stem of A-loop (n=5)

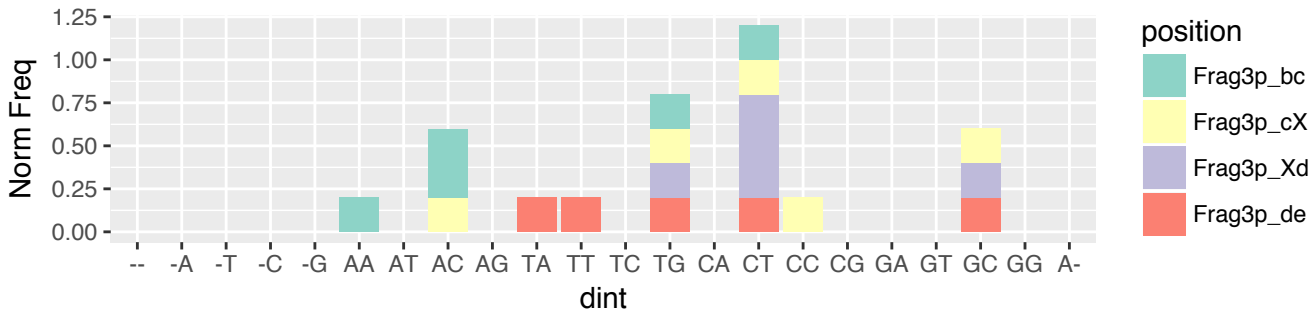

DLBC (n=1189)  
 5'-half & exclusive (n=5)  
 3' terminus relative to 5' stem of A-loop (n=5)

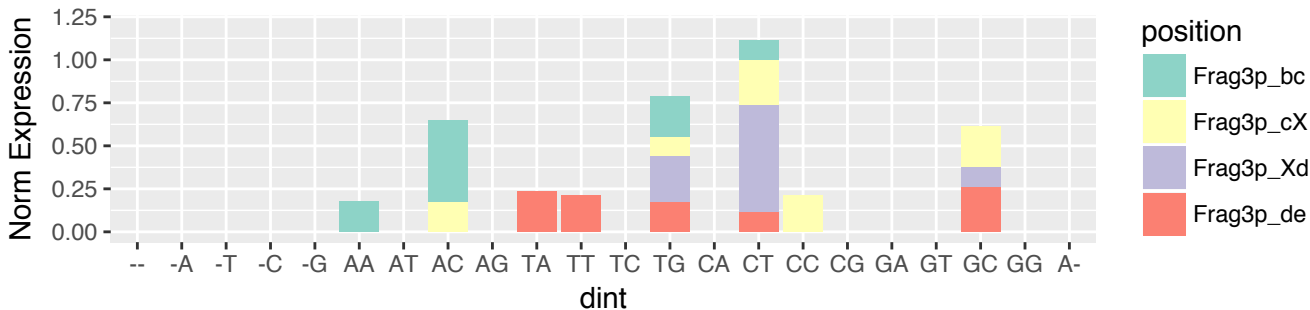

DLBC (n=1189)  
 5'-tRF & exclusive (n=164)  
 5' terminus relative to 5' end of the tRNA (n=164)

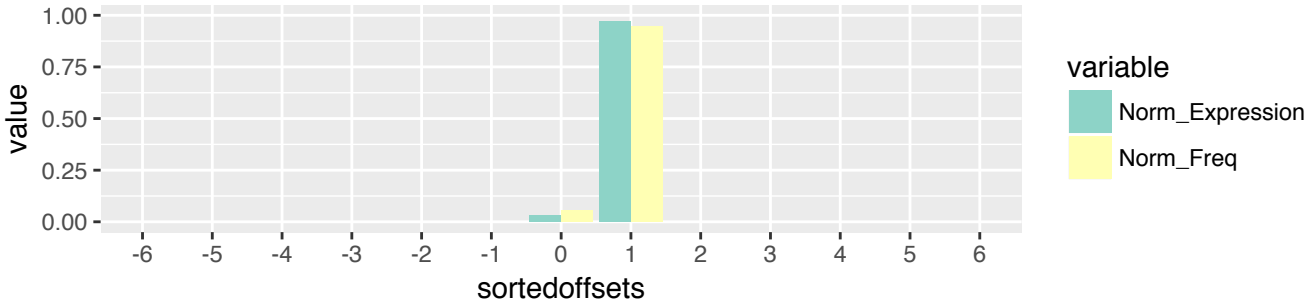

DLBC (n=1189)  
 5'-tRF & exclusive (n=164)  
 5' terminus relative to 5' end of the tRNA (n=164)

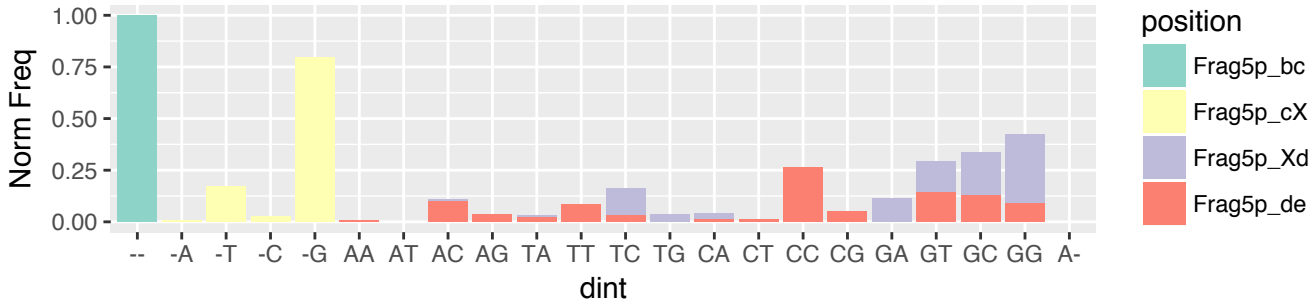

DLBC (n=1189)  
 5'-tRF & exclusive (n=164)  
 5' terminus relative to 5' end of the tRNA (n=164)

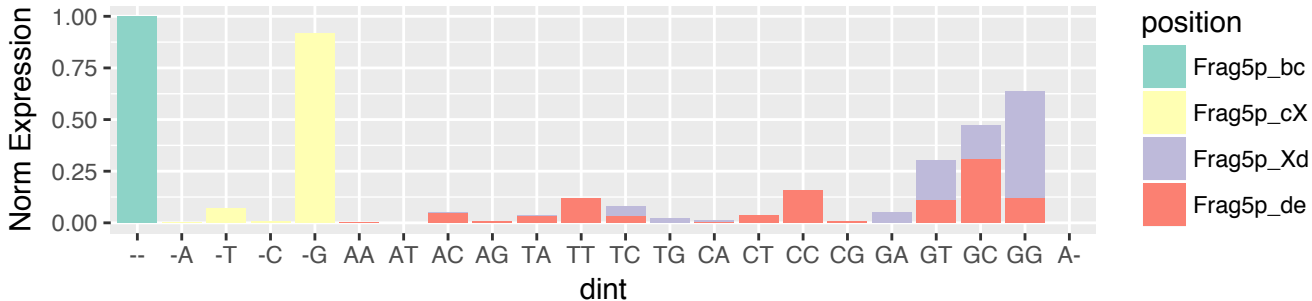

DLBC (n=1189)  
 5'-tRF & exclusive (n=164)  
 3' terminus relative to 5' stem of D-loop (n=6)

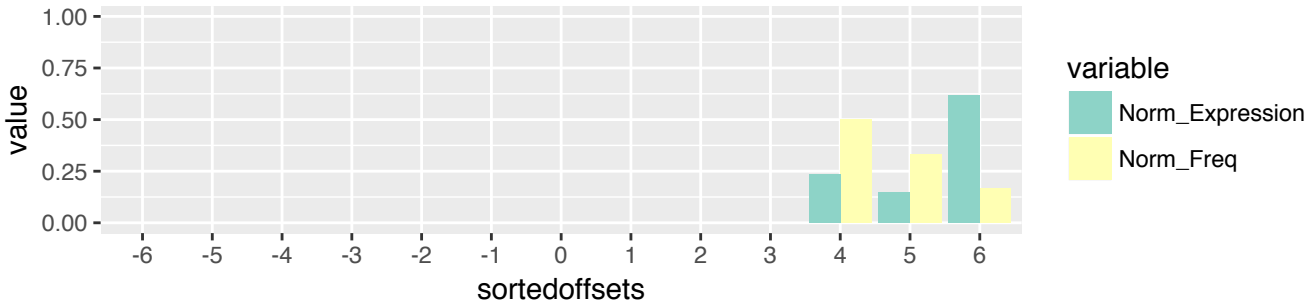

DLBC (n=1189)  
 5'-tRF & exclusive (n=164)  
 3' terminus relative to 5' stem of D-loop (n=6)

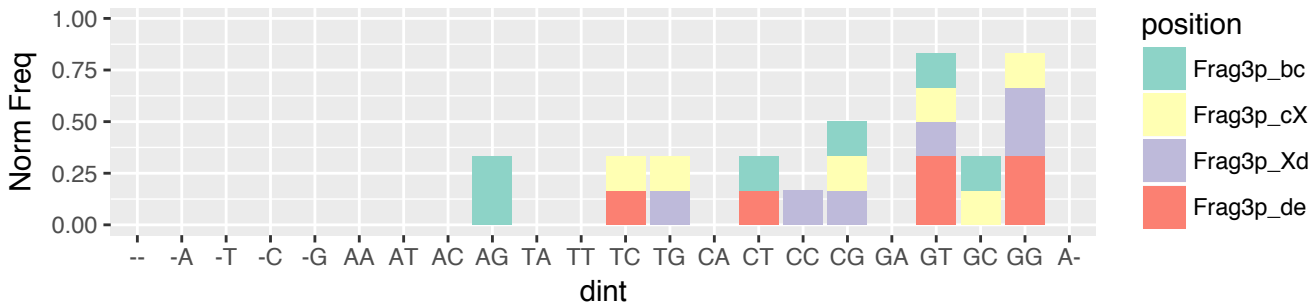

DLBC (n=1189)  
 5'-tRF & exclusive (n=164)  
 3' terminus relative to 5' stem of D-loop (n=6)

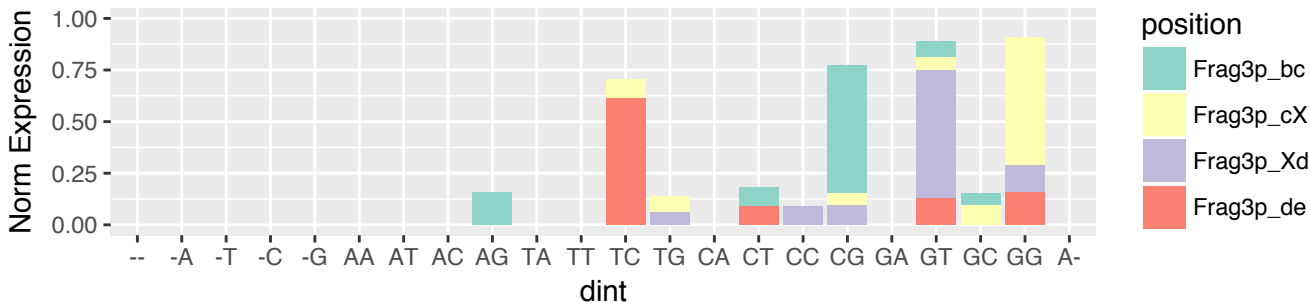

DLBC (n=1189)  
 5'-tRF & exclusive (n=164)  
 3' terminus relative to 3' stem of D-loop (n=142)

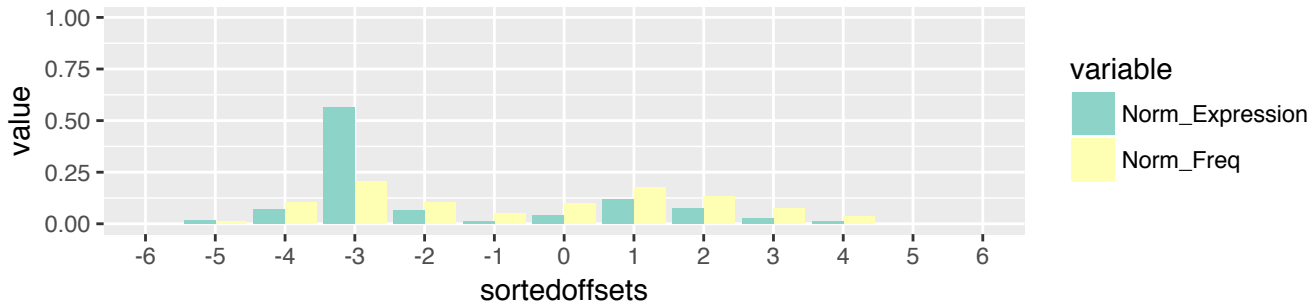

DLBC (n=1189)  
 5'-tRF & exclusive (n=164)  
 3' terminus relative to 3' stem of D-loop (n=142)

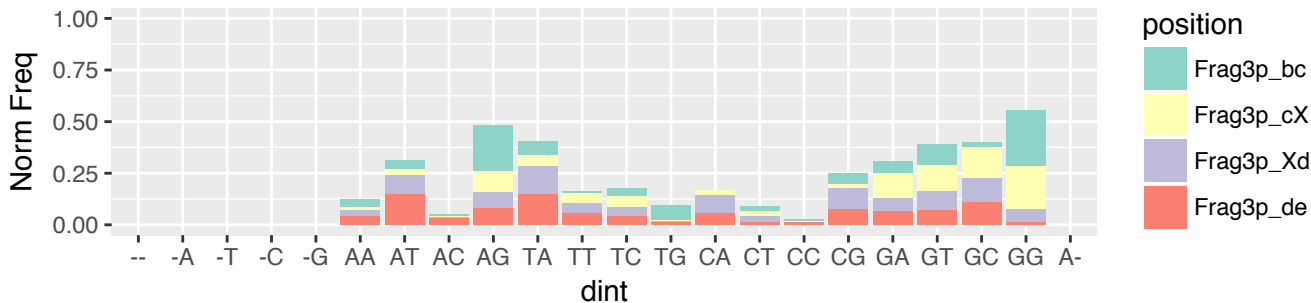

DLBC (n=1189)  
 5'-tRF & exclusive (n=164)  
 3' terminus relative to 3' stem of D-loop (n=142)

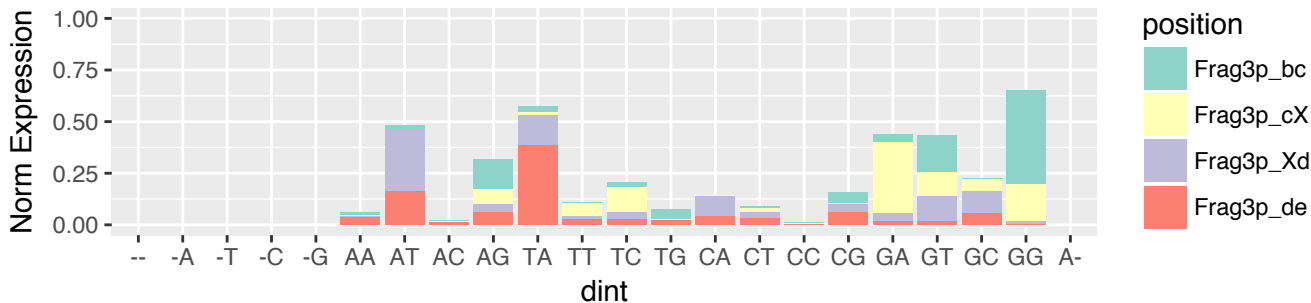



DLBC (n=1189)  
 5'-tRF & exclusive (n=164)  
 3' terminus relative to 5' stem of A-loop (n=11)

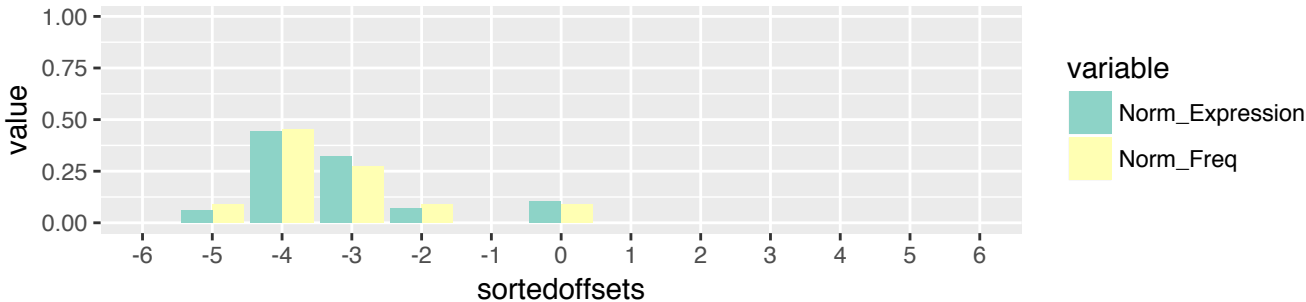

DLBC (n=1189)  
 5'-tRF & exclusive (n=164)  
 3' terminus relative to 5' stem of A-loop (n=11)

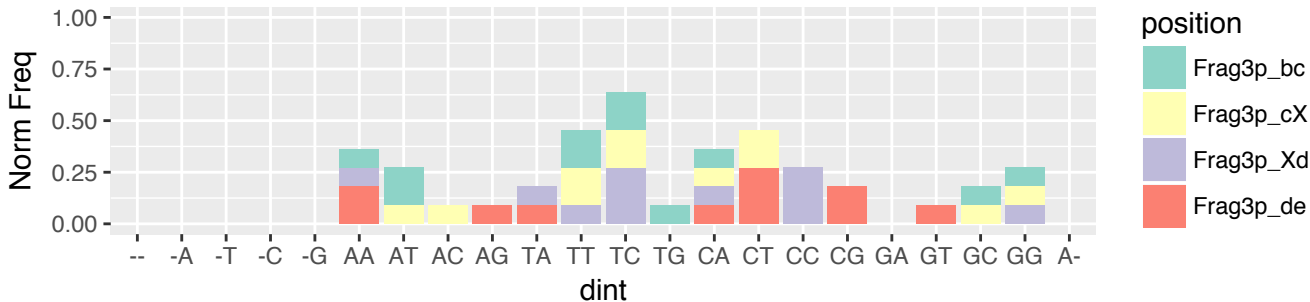

DLBC (n=1189)  
 5'-tRF & exclusive (n=164)  
 3' terminus relative to 5' stem of A-loop (n=11)

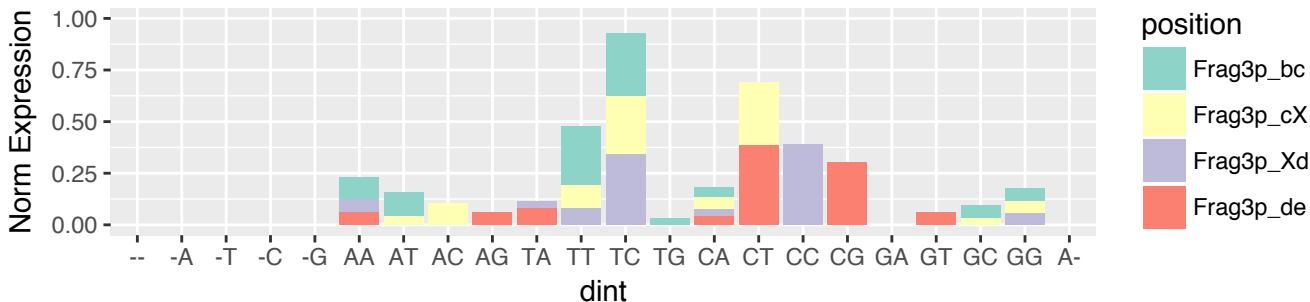

DLBC (n=1189)  
 5'-tRF & exclusive (n=164)  
 3' terminus relative to 3' stem of A-loop (n=5)

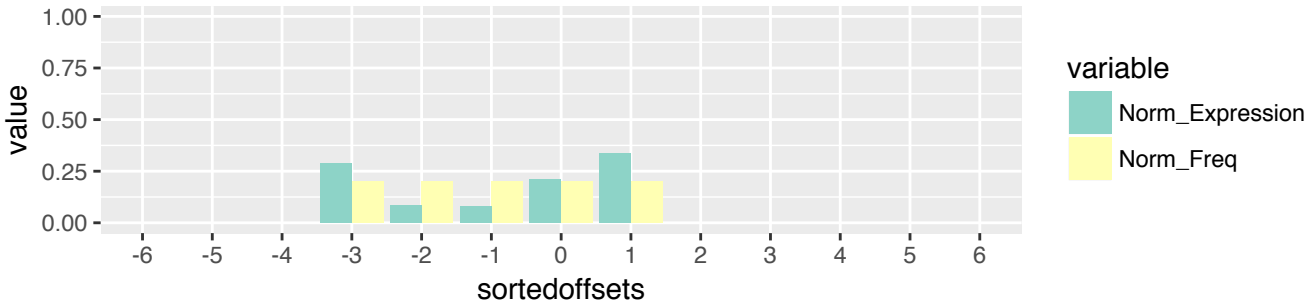

DLBC (n=1189)  
 5'-tRF & exclusive (n=164)  
 3' terminus relative to 3' stem of A-loop (n=5)

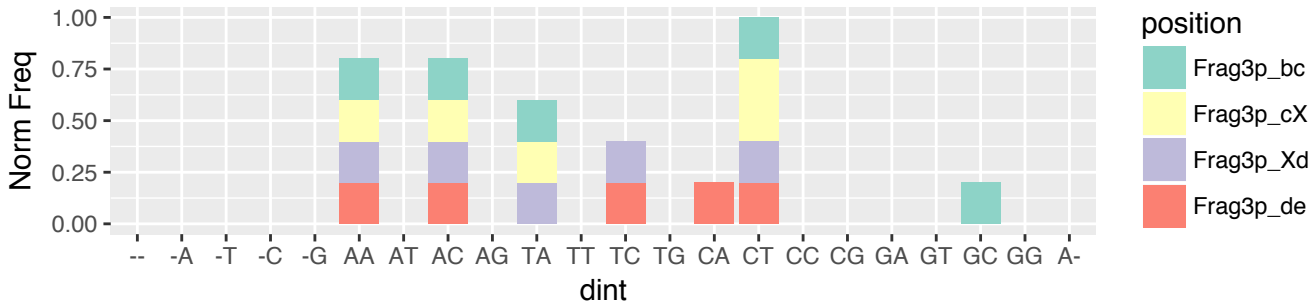

DLBC (n=1189)  
 5'-tRF & exclusive (n=164)  
 3' terminus relative to 3' stem of A-loop (n=5)

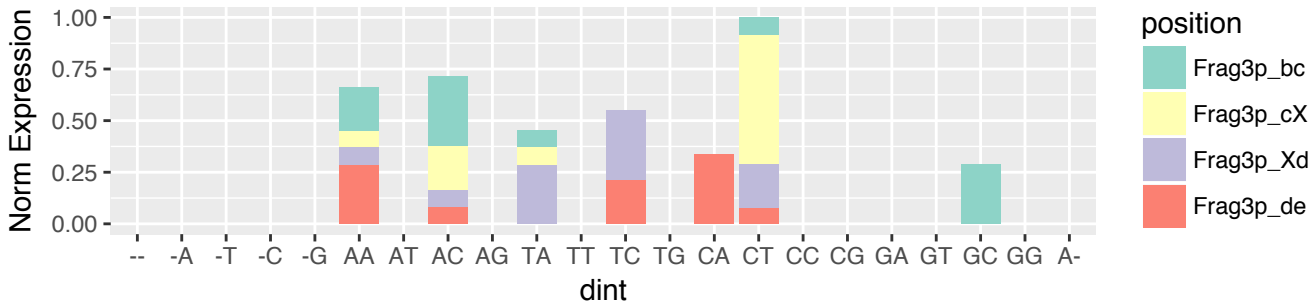

DLBC (n=1189)  
 i-tRF & exclusive (n=278)  
 5' terminus relative to 5' end of the tRNA (n=11)

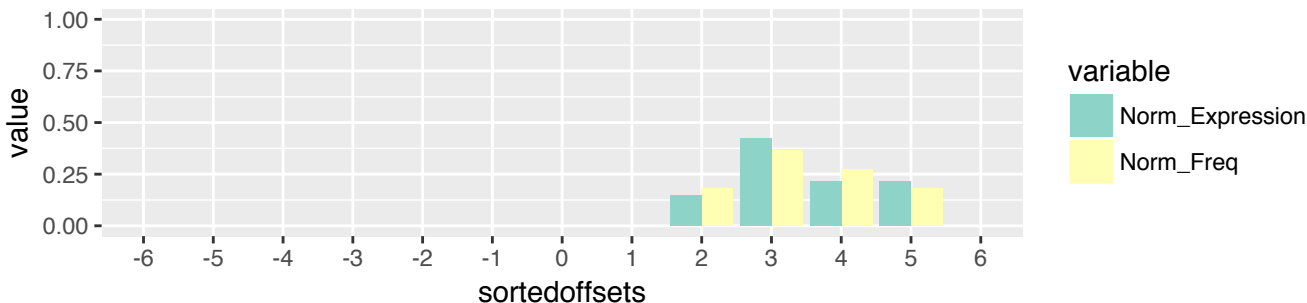

DLBC (n=1189)  
 i-tRF & exclusive (n=278)  
 5' terminus relative to 5' end of the tRNA (n=11)

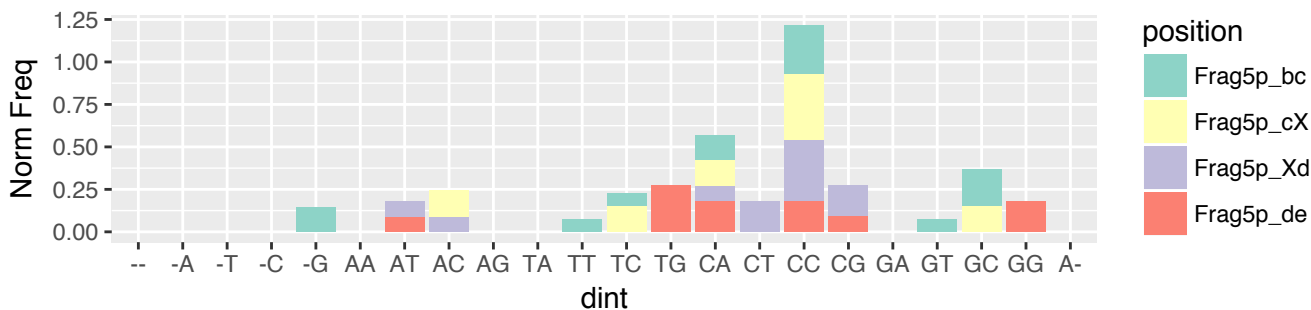

DLBC (n=1189)  
 i-tRF & exclusive (n=278)  
 5' terminus relative to 5' end of the tRNA (n=11)

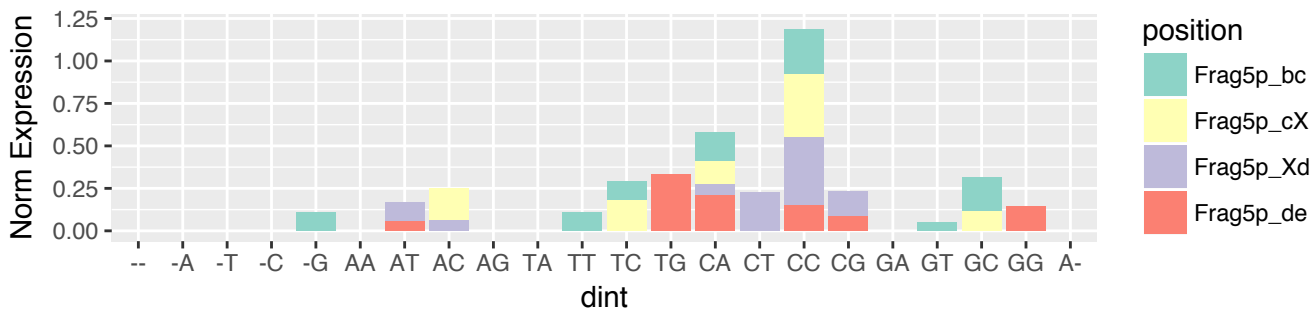

DLBC (n=1189)  
 i-tRF & exclusive (n=278)  
 5' terminus relative to 5' stem of D-loop (n=97)

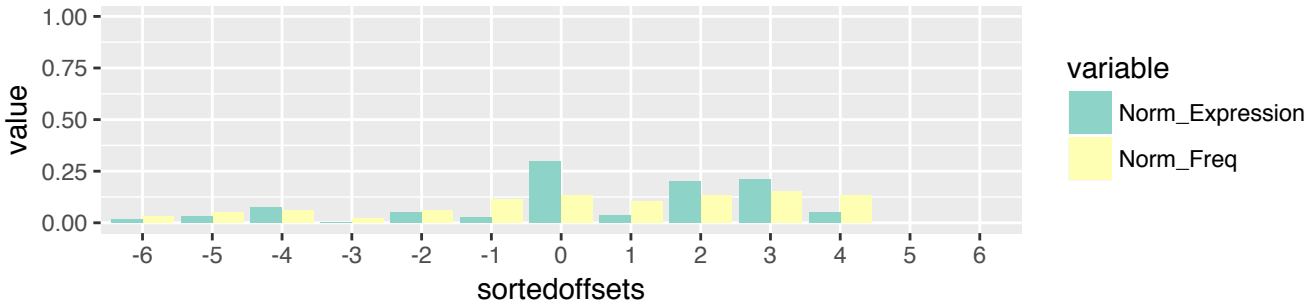

DLBC (n=1189)  
 i-tRF & exclusive (n=278)  
 5' terminus relative to 5' stem of D-loop (n=97)

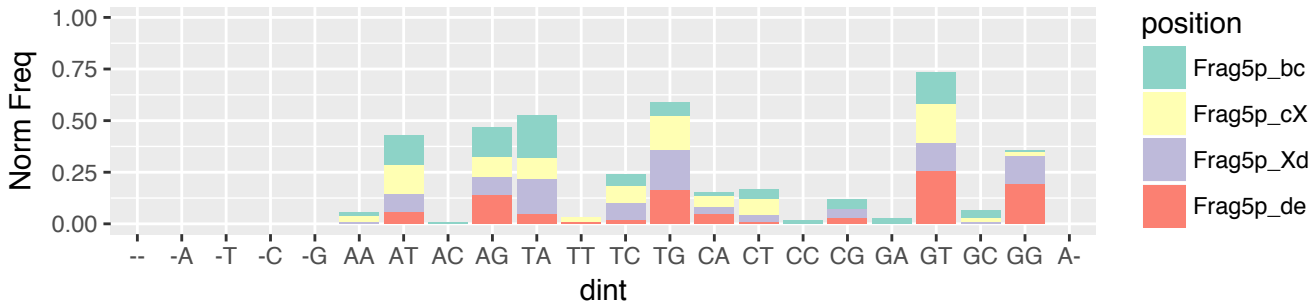

DLBC (n=1189)  
 i-tRF & exclusive (n=278)  
 5' terminus relative to 5' stem of D-loop (n=97)

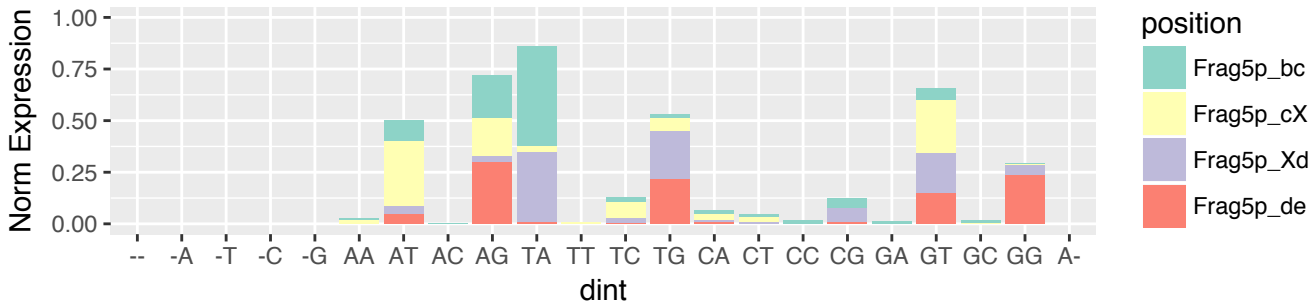

DLBC (n=1189)  
i-tRF & exclusive (n=278)  
5' terminus relative to 3' stem of D-loop (n=15)

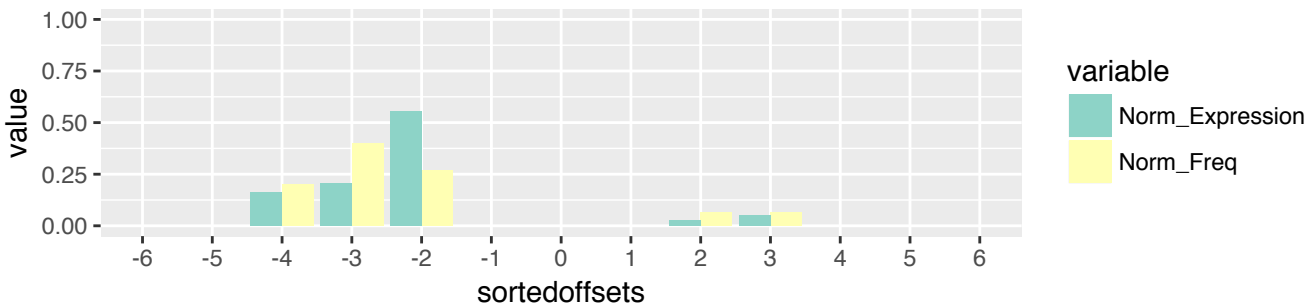

DLBC (n=1189)  
i-tRF & exclusive (n=278)  
5' terminus relative to 3' stem of D-loop (n=15)

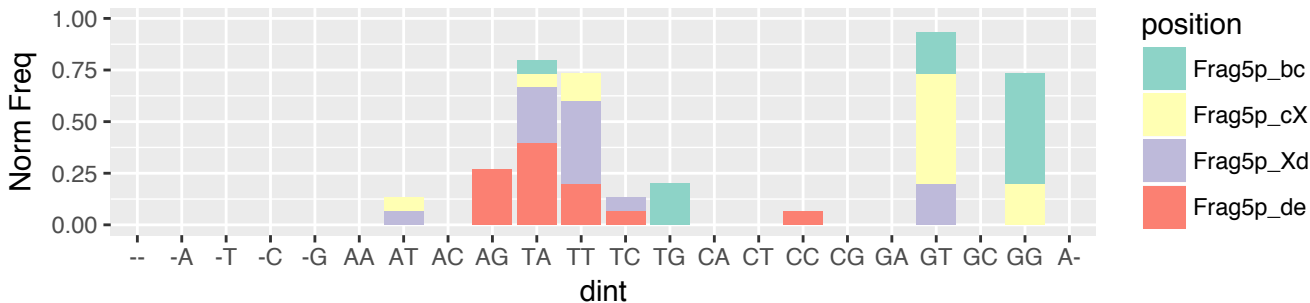

DLBC (n=1189)  
i-tRF & exclusive (n=278)  
5' terminus relative to 3' stem of D-loop (n=15)

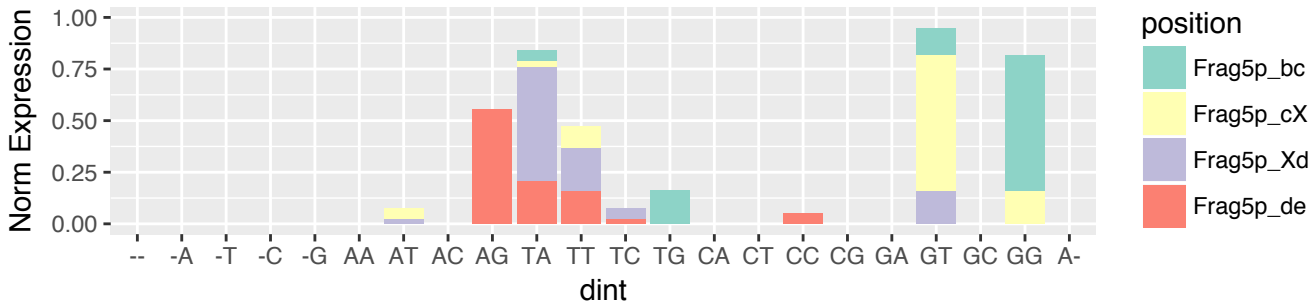

DLBC (n=1189)  
i-tRF & exclusive (n=278)  
5' terminus relative to 5' stem of A-loop (n=79)

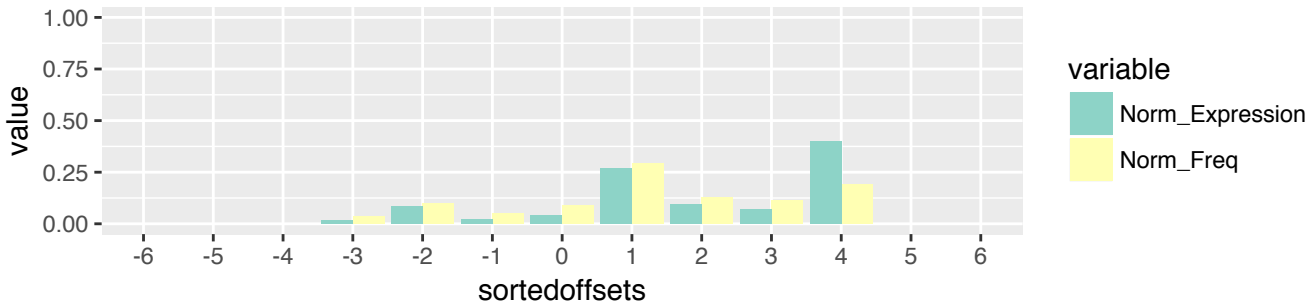

DLBC (n=1189)  
i-tRF & exclusive (n=278)  
5' terminus relative to 5' stem of A-loop (n=79)

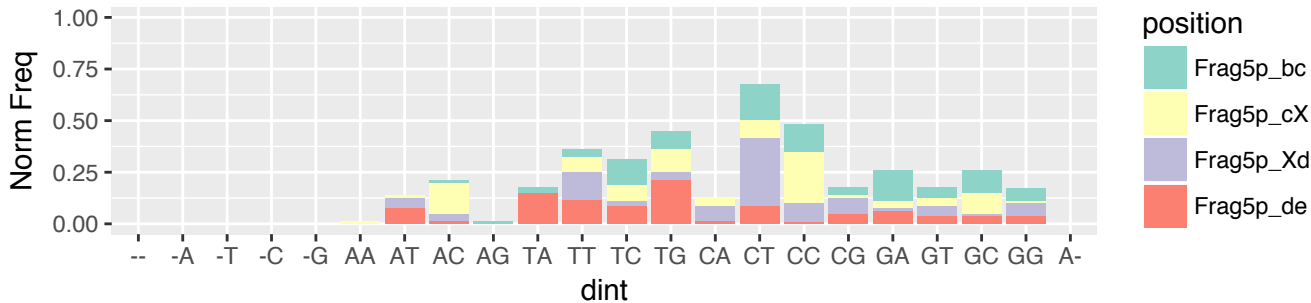

DLBC (n=1189)  
i-tRF & exclusive (n=278)  
5' terminus relative to 5' stem of A-loop (n=79)

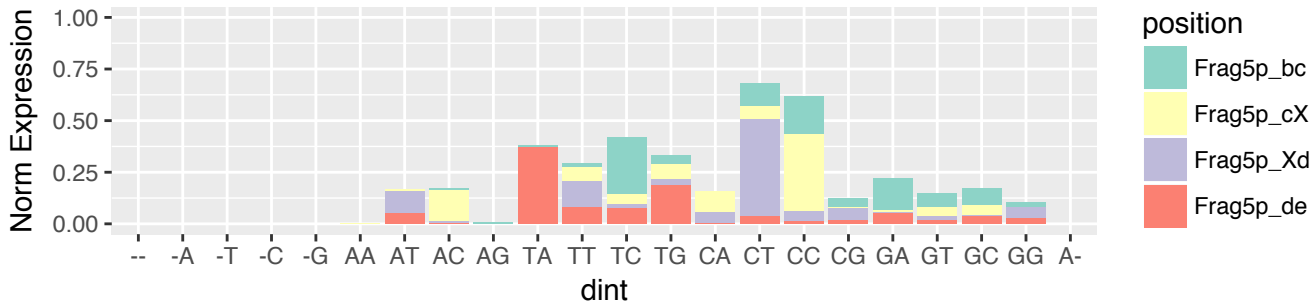

DLBC (n=1189)  
 i-tRF & exclusive (n=278)  
 5' terminus relative to 3' stem of A-loop (n=61)

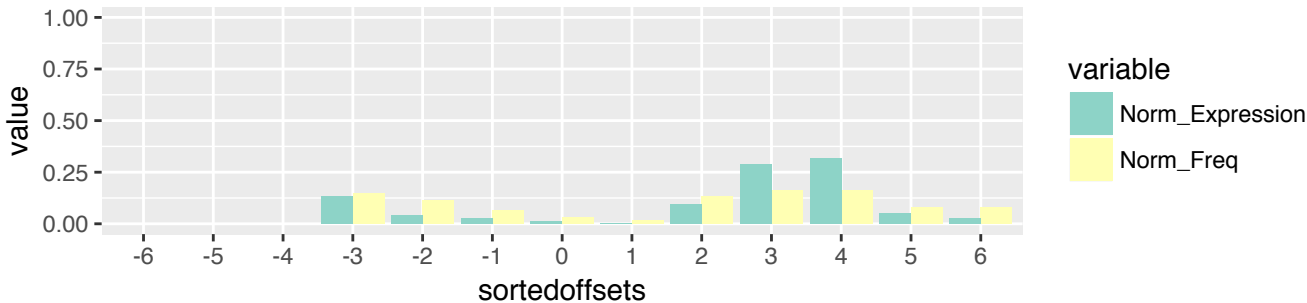

DLBC (n=1189)  
 i-tRF & exclusive (n=278)  
 5' terminus relative to 3' stem of A-loop (n=61)

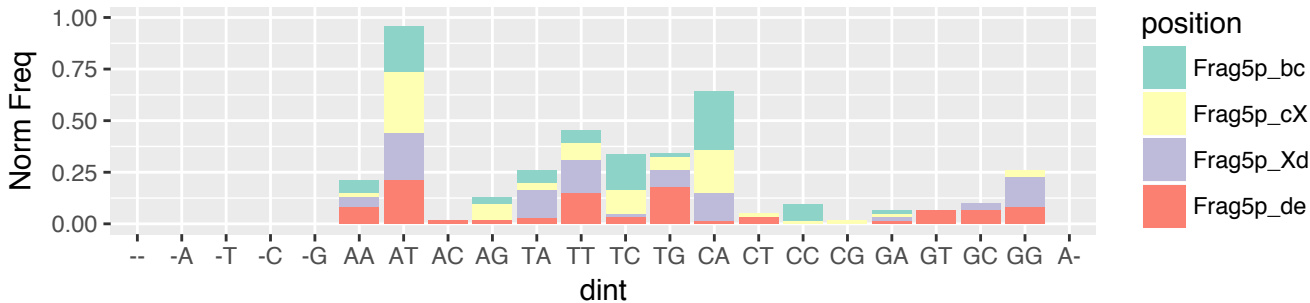

DLBC (n=1189)  
 i-tRF & exclusive (n=278)  
 5' terminus relative to 3' stem of A-loop (n=61)

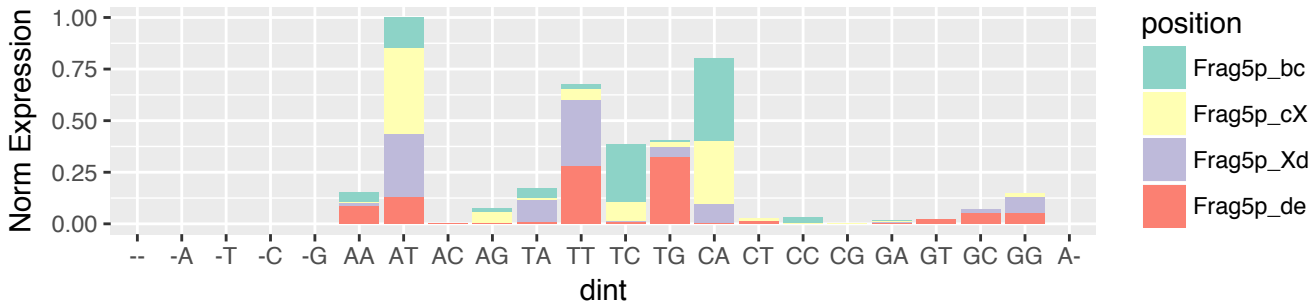

DLBC (n=1189)  
i-tRF & exclusive (n=278)  
5' terminus relative to 5' stem of T-loop (n=15)

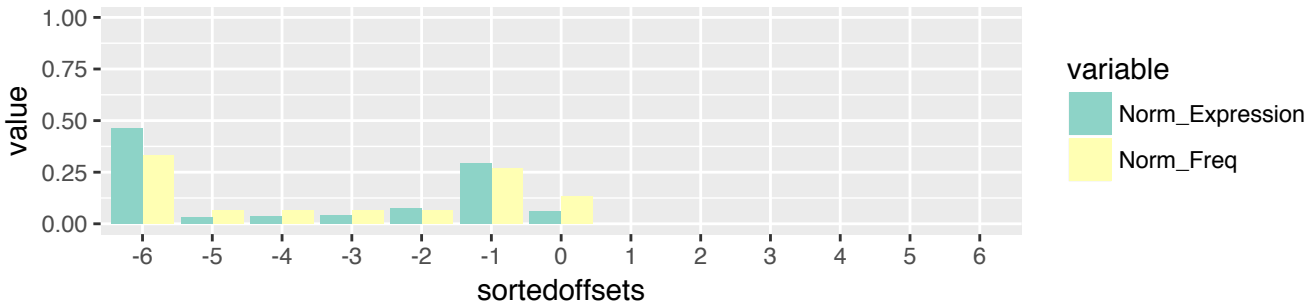

DLBC (n=1189)  
i-tRF & exclusive (n=278)  
5' terminus relative to 5' stem of T-loop (n=15)

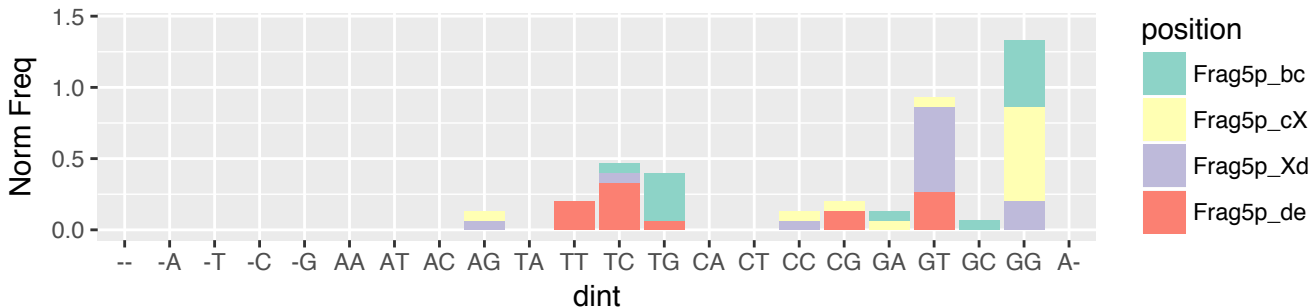

DLBC (n=1189)  
i-tRF & exclusive (n=278)  
5' terminus relative to 5' stem of T-loop (n=15)

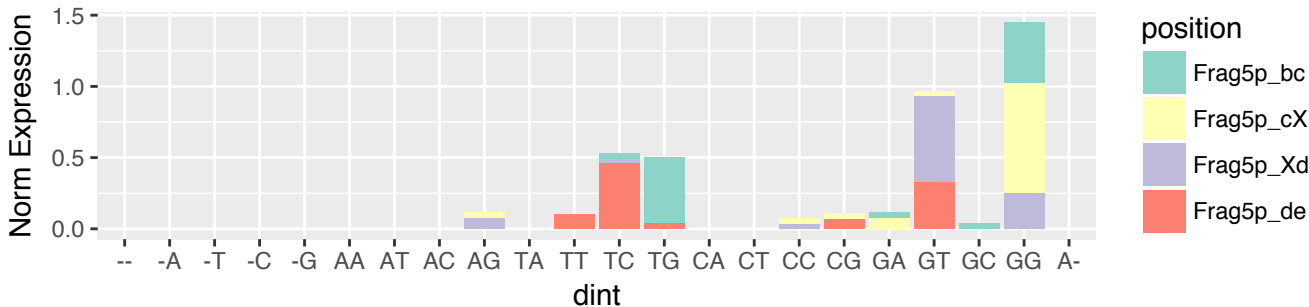



DLBC (n=1189)  
 i-tRF & exclusive (n=278)  
 3' terminus relative to 3' stem of D-loop (n=4)

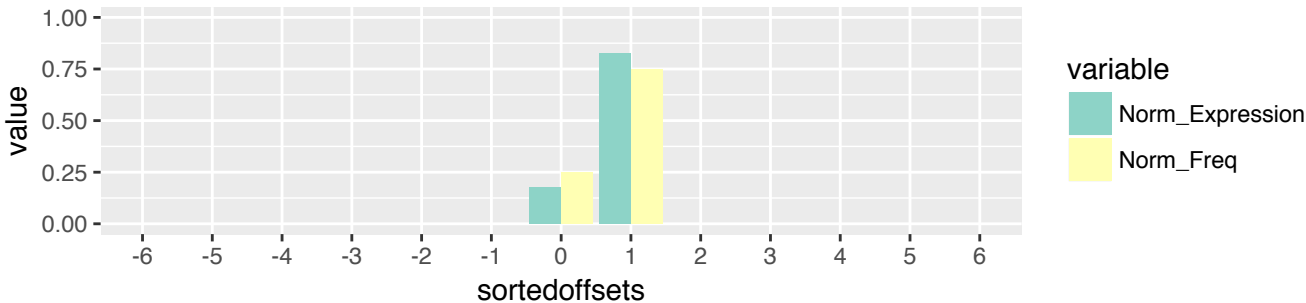

DLBC (n=1189)  
 i-tRF & exclusive (n=278)  
 3' terminus relative to 3' stem of D-loop (n=4)

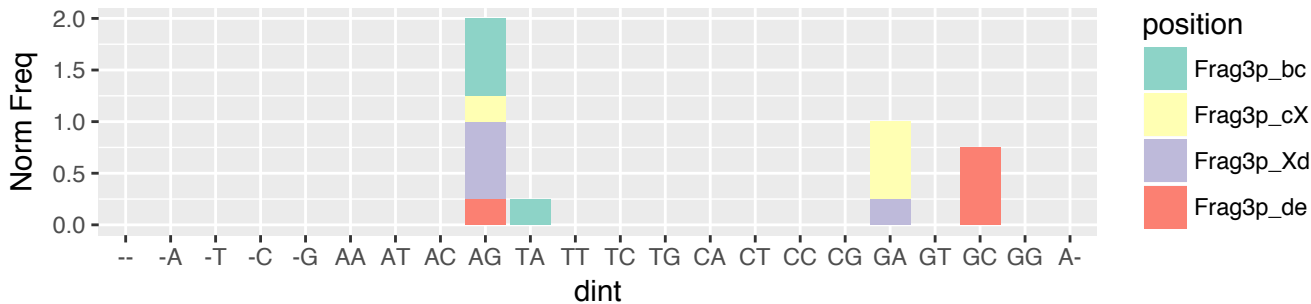

DLBC (n=1189)  
 i-tRF & exclusive (n=278)  
 3' terminus relative to 3' stem of D-loop (n=4)

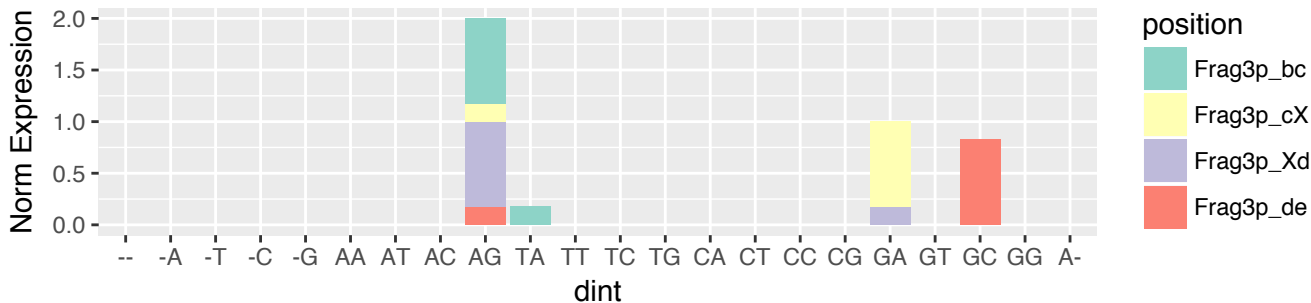

DLBC (n=1189)  
 i-tRF & exclusive (n=278)  
 3' terminus relative to 5' stem of A-loop (n=82)

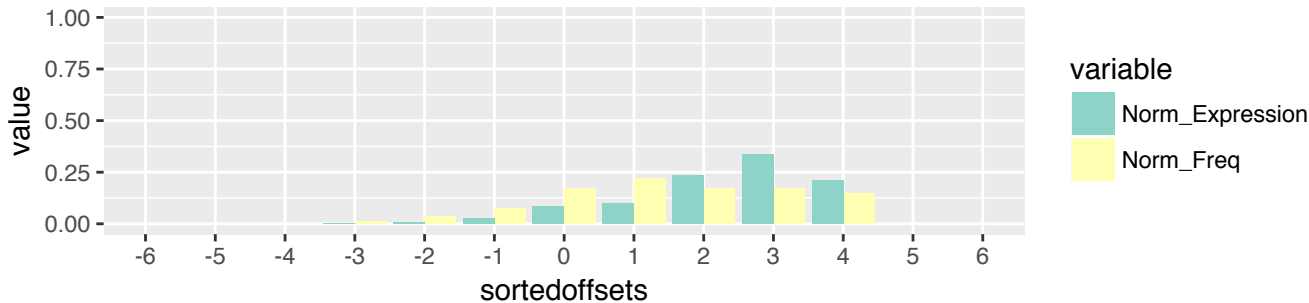

DLBC (n=1189)  
 i-tRF & exclusive (n=278)  
 3' terminus relative to 5' stem of A-loop (n=82)

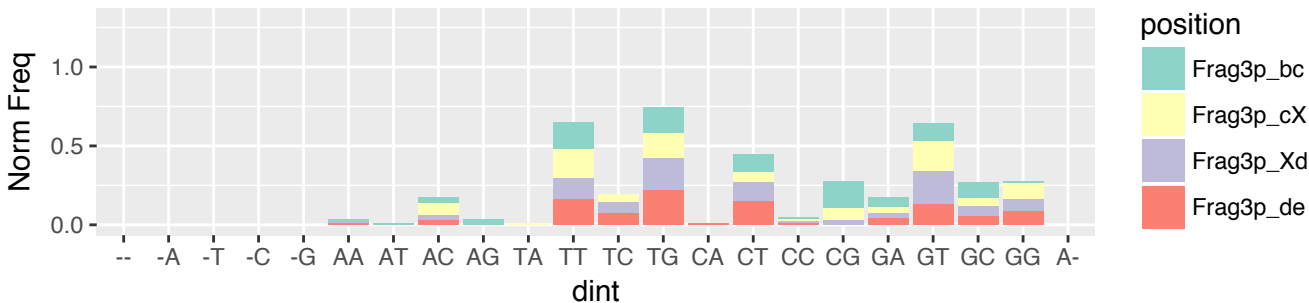

DLBC (n=1189)  
 i-tRF & exclusive (n=278)  
 3' terminus relative to 5' stem of A-loop (n=82)

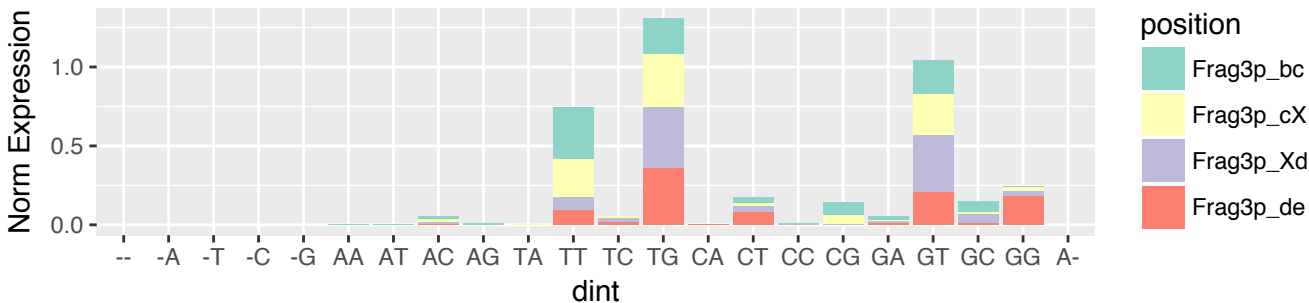

DLBC (n=1189)  
 i-tRF & exclusive (n=278)  
 3' terminus relative to 3' stem of A-loop (n=42)

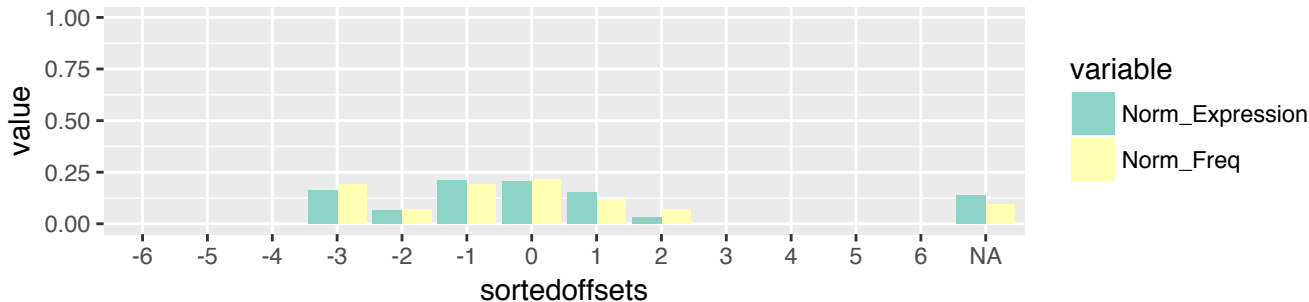

DLBC (n=1189)  
 i-tRF & exclusive (n=278)  
 3' terminus relative to 3' stem of A-loop (n=42)

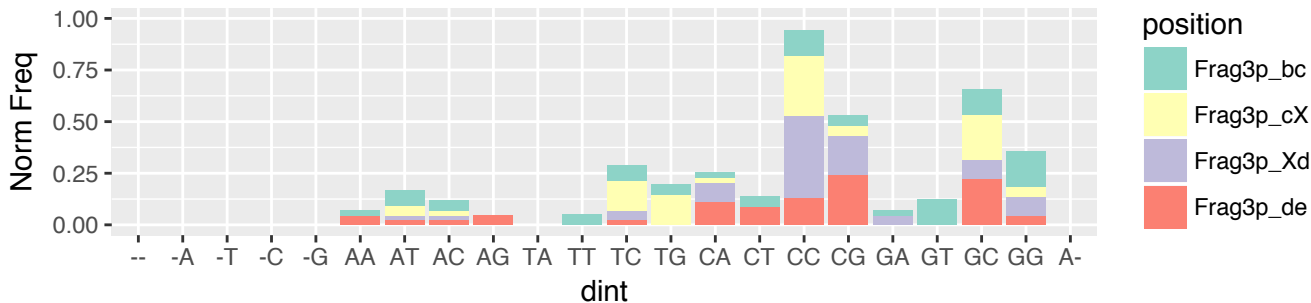

DLBC (n=1189)  
 i-tRF & exclusive (n=278)  
 3' terminus relative to 3' stem of A-loop (n=42)

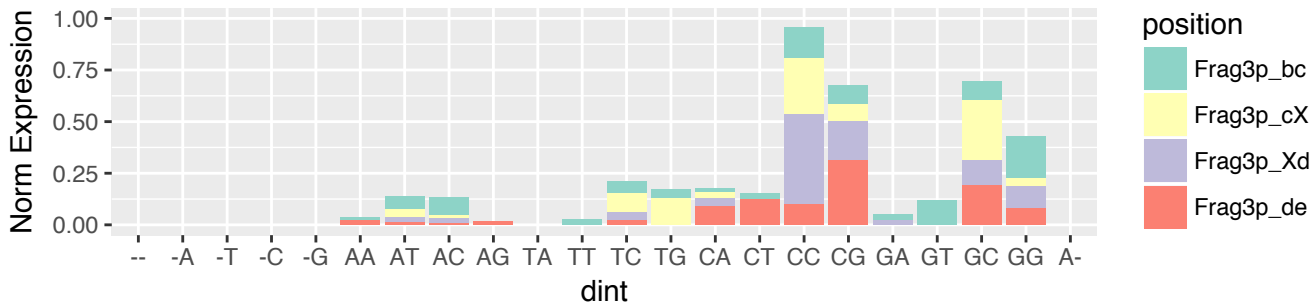

DLBC (n=1189)  
 i-tRF & exclusive (n=278)  
 3' terminus relative to 5' stem of T-loop (n=82)

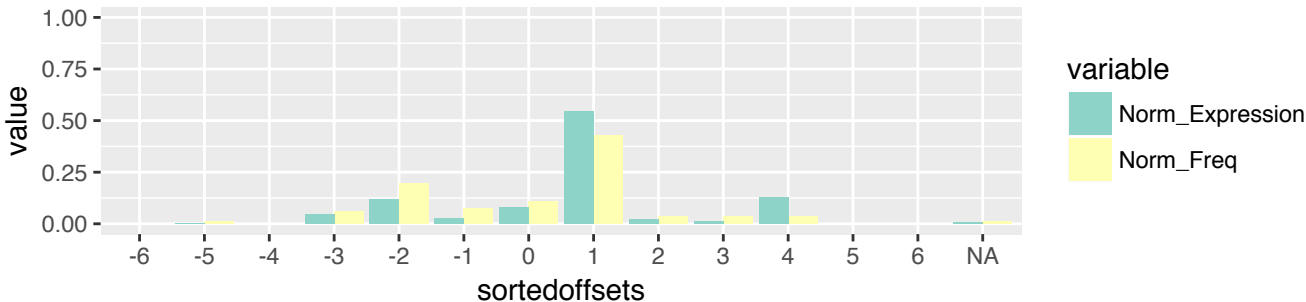

DLBC (n=1189)  
 i-tRF & exclusive (n=278)  
 3' terminus relative to 5' stem of T-loop (n=82)

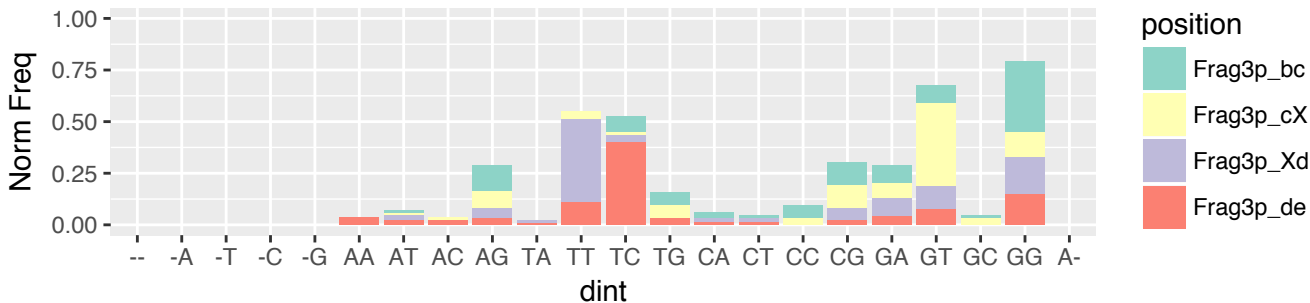

DLBC (n=1189)  
 i-tRF & exclusive (n=278)  
 3' terminus relative to 5' stem of T-loop (n=82)

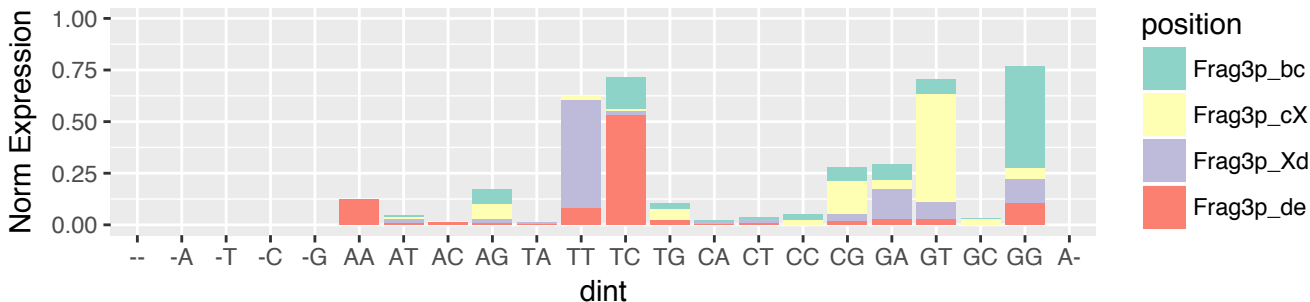

DLBC (n=1189)  
i-tRF & exclusive (n=278)  
3' terminus relative to 3' stem of T-loop (n=49)

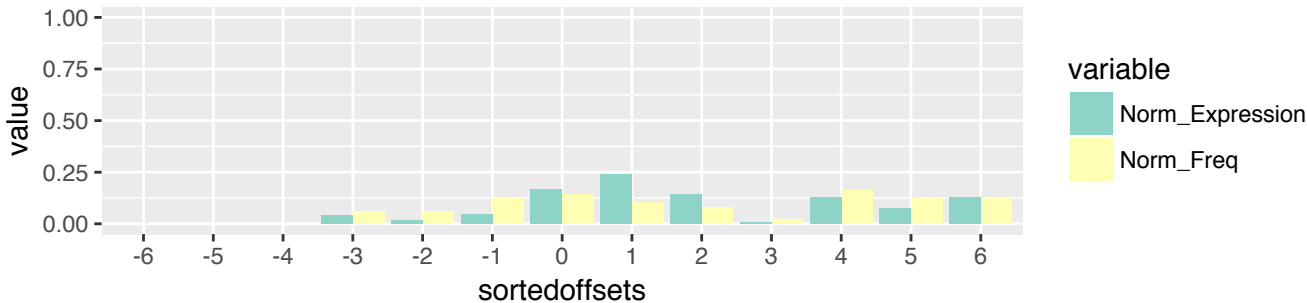

DLBC (n=1189)  
i-tRF & exclusive (n=278)  
3' terminus relative to 3' stem of T-loop (n=49)

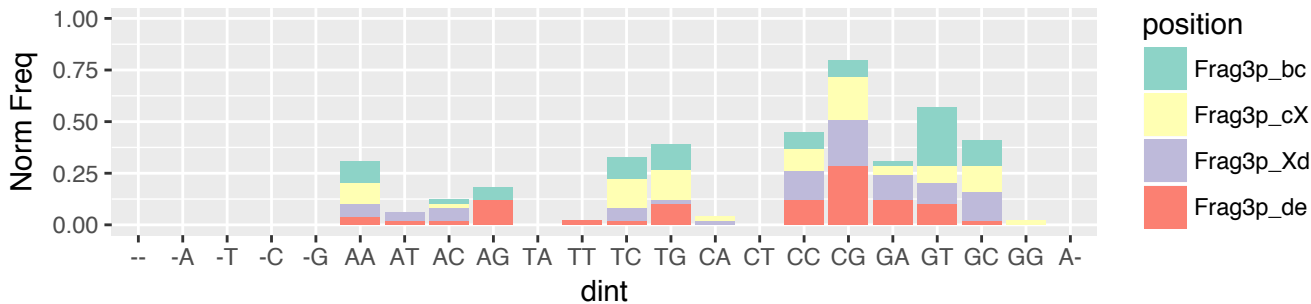

DLBC (n=1189)  
i-tRF & exclusive (n=278)  
3' terminus relative to 3' stem of T-loop (n=49)

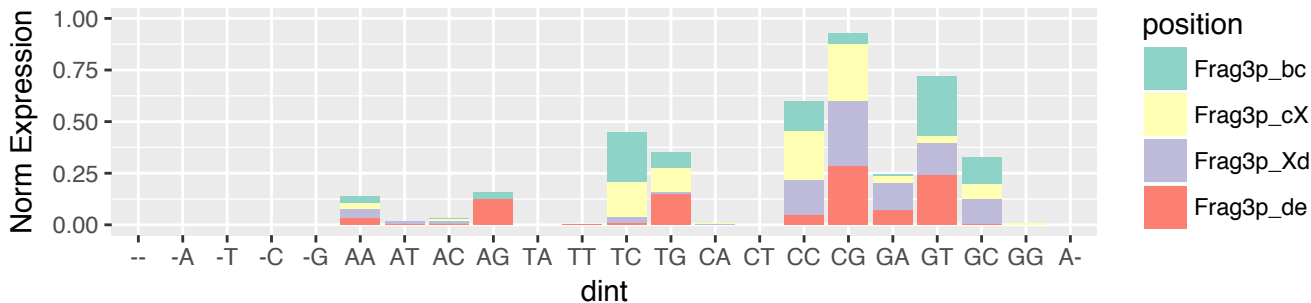

DLBC (n=1189)  
 i-tRF & exclusive (n=278)  
 3' terminus relative to 3' end of the tRNA (n=20)

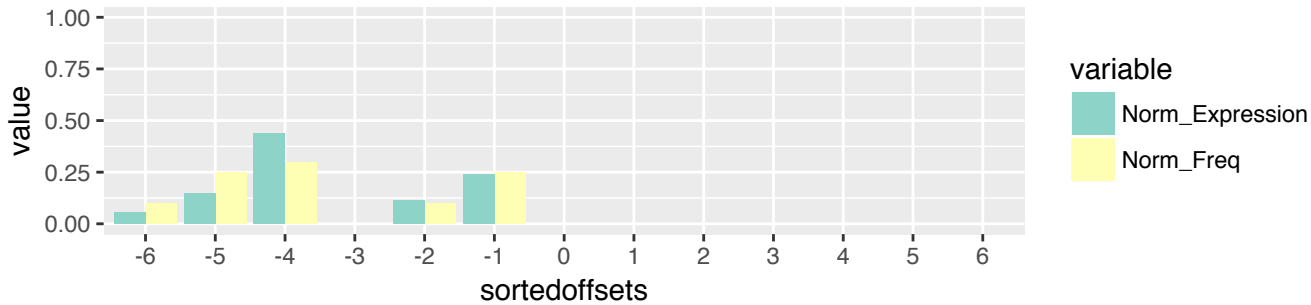

DLBC (n=1189)  
 i-tRF & exclusive (n=278)  
 3' terminus relative to 3' end of the tRNA (n=20)

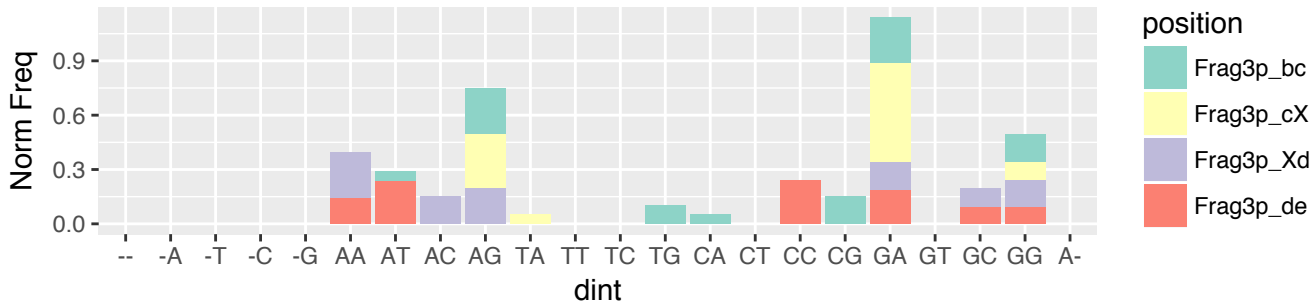

DLBC (n=1189)  
 i-tRF & exclusive (n=278)  
 3' terminus relative to 3' end of the tRNA (n=20)

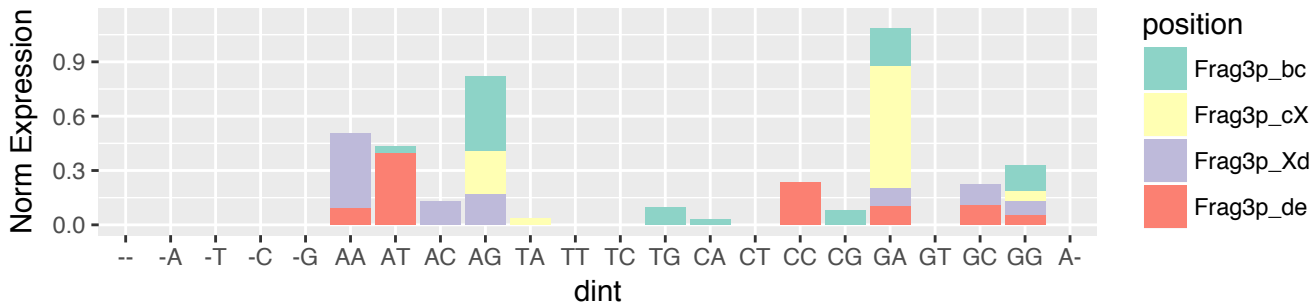

DLBC (n=1189)  
 3'-tRF & exclusive (n=182)  
 5' terminus relative to 5' stem of T-loop (n=115)

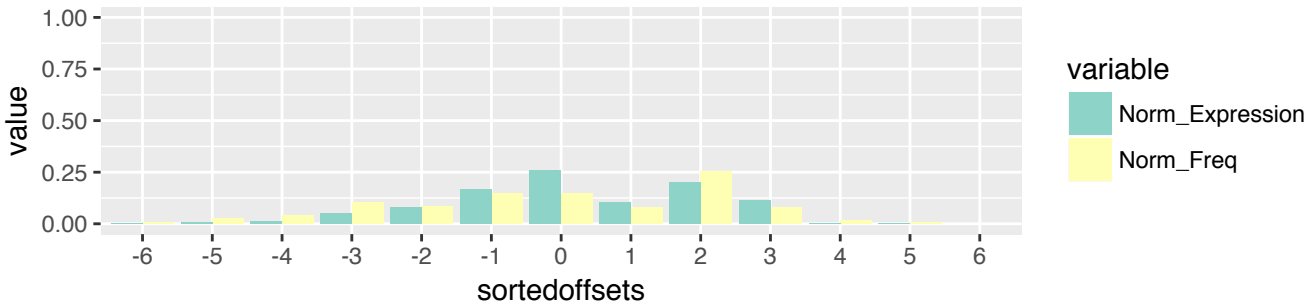

DLBC (n=1189)  
 3'-tRF & exclusive (n=182)  
 5' terminus relative to 5' stem of T-loop (n=115)

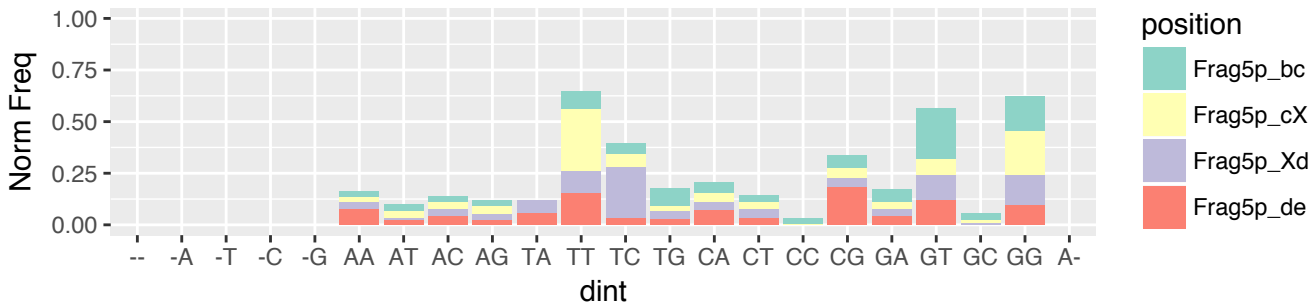

DLBC (n=1189)  
 3'-tRF & exclusive (n=182)  
 5' terminus relative to 5' stem of T-loop (n=115)

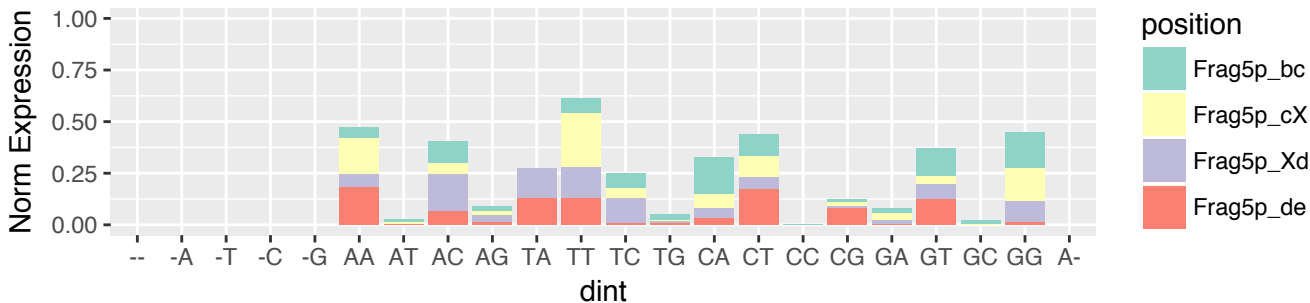

DLBC (n=1189)  
 3'-tRF & exclusive (n=182)  
 5' terminus relative to 3' stem of T-loop (n=67)

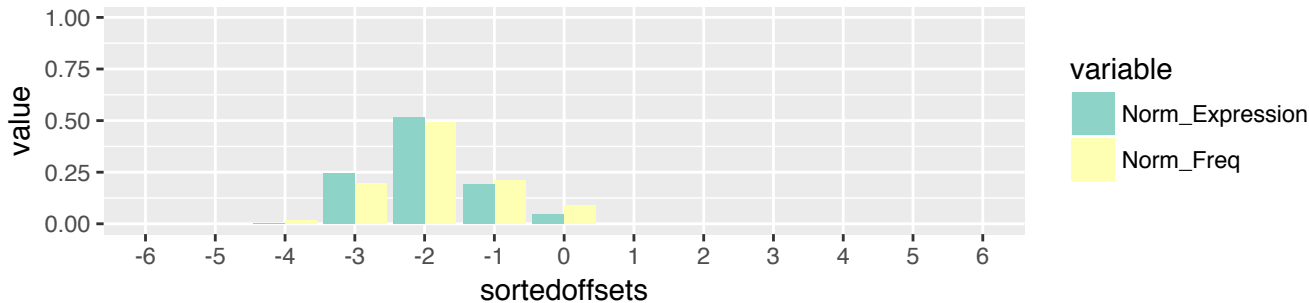

DLBC (n=1189)  
 3'-tRF & exclusive (n=182)  
 5' terminus relative to 3' stem of T-loop (n=67)

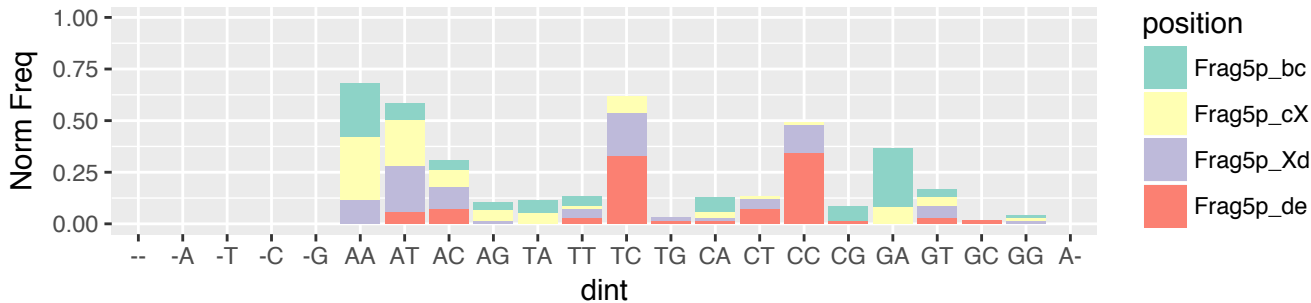

DLBC (n=1189)  
 3'-tRF & exclusive (n=182)  
 5' terminus relative to 3' stem of T-loop (n=67)

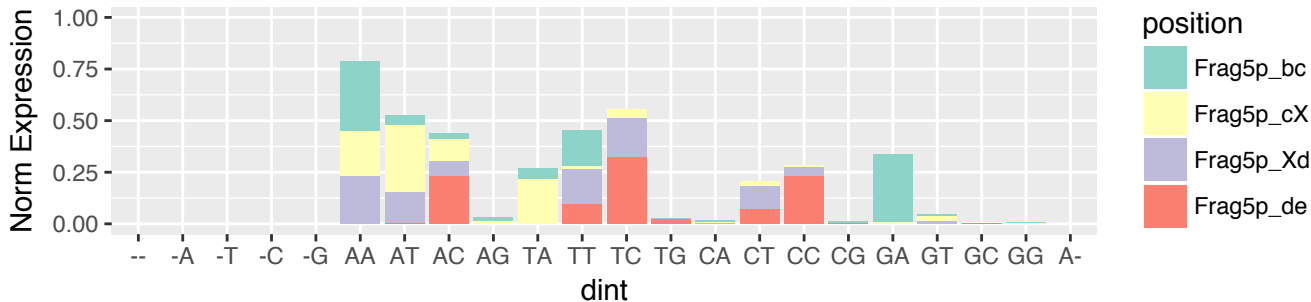



DLBC (n=1189)  
 3'-tRF & exclusive (n=182)  
 3' terminus relative to 3' end of the tRNA (n=182)

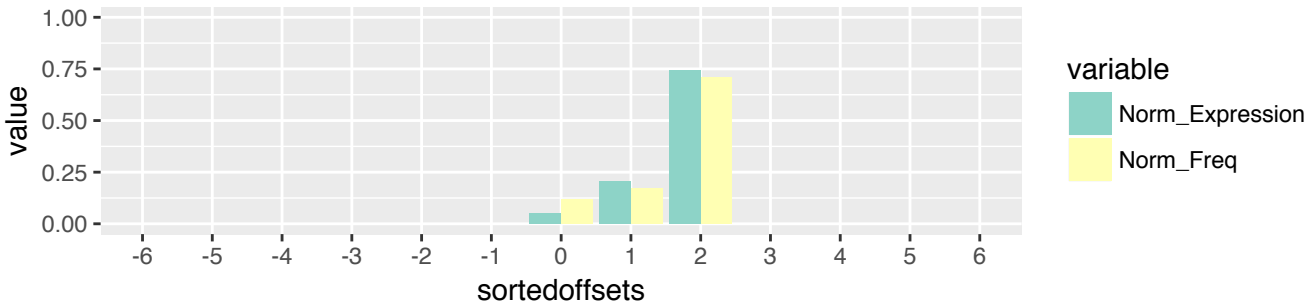

DLBC (n=1189)  
 3'-tRF & exclusive (n=182)  
 3' terminus relative to 3' end of the tRNA (n=182)

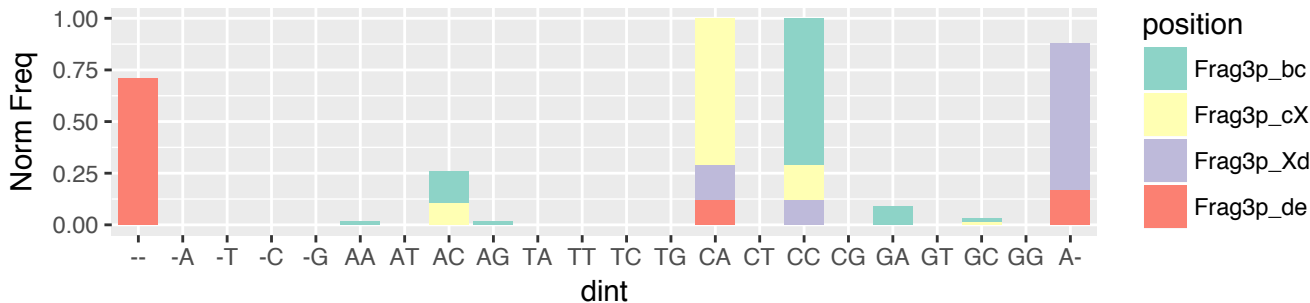

DLBC (n=1189)  
 3'-tRF & exclusive (n=182)  
 3' terminus relative to 3' end of the tRNA (n=182)

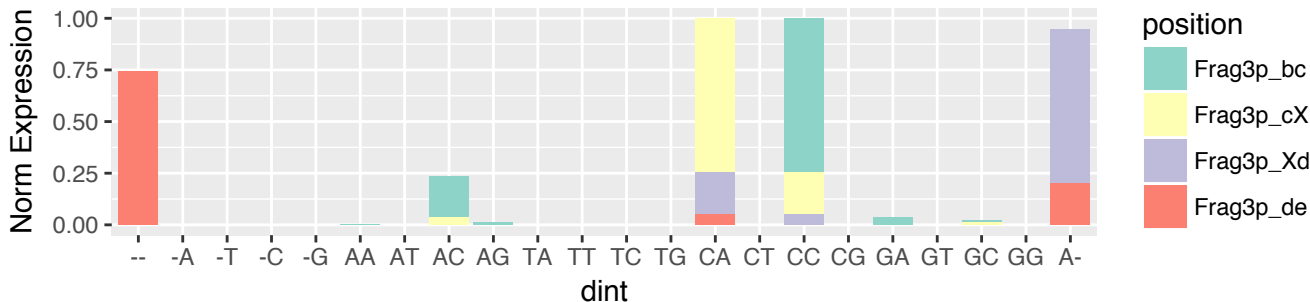

ESCA (n=813)  
5'-half & exclusive (n=3)  
5' terminus relative to 5' end of the tRNA (n=3)

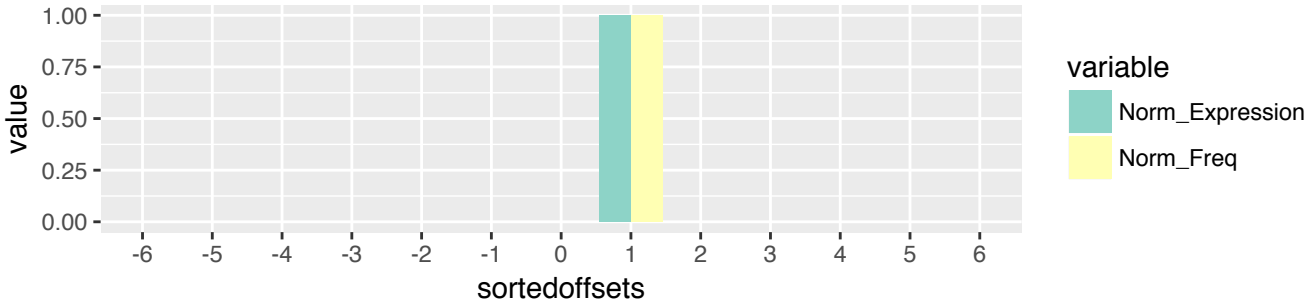

ESCA (n=813)  
5'-half & exclusive (n=3)  
5' terminus relative to 5' end of the tRNA (n=3)

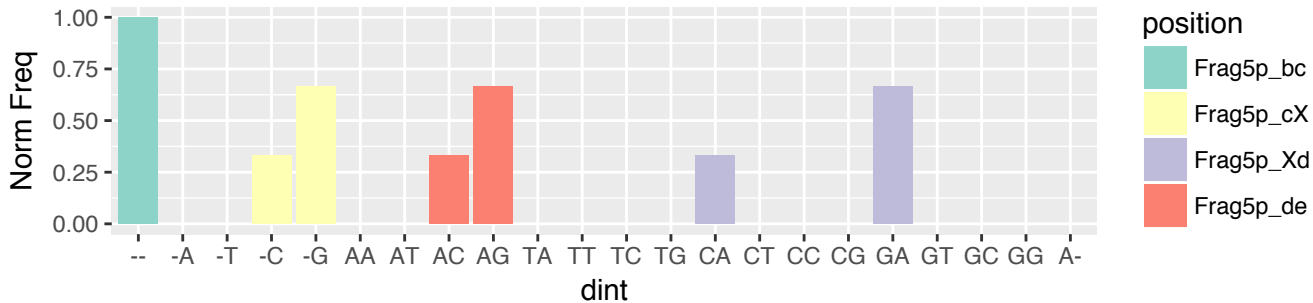

ESCA (n=813)  
5'-half & exclusive (n=3)  
5' terminus relative to 5' end of the tRNA (n=3)

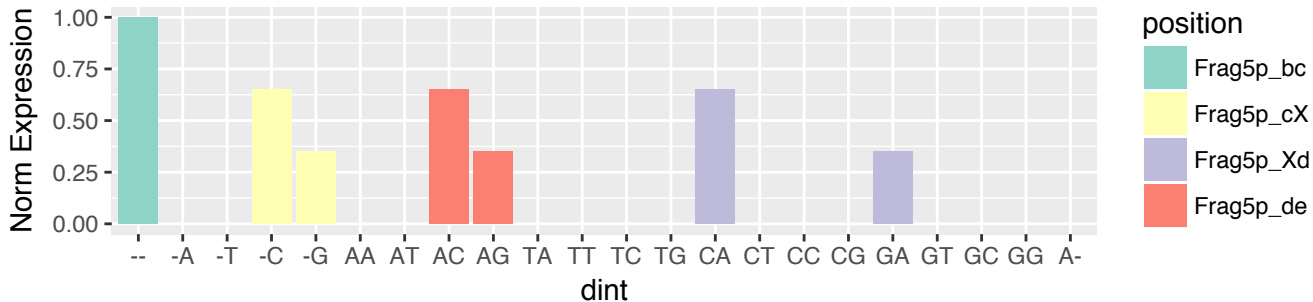

ESCA (n=813)  
 5'-half & exclusive (n=3)  
 3' terminus relative to 5' stem of A-loop (n=3)

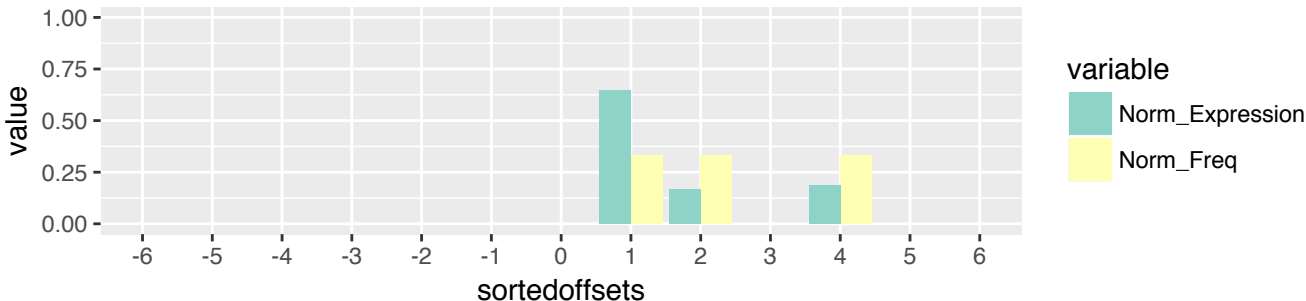

ESCA (n=813)  
 5'-half & exclusive (n=3)  
 3' terminus relative to 5' stem of A-loop (n=3)

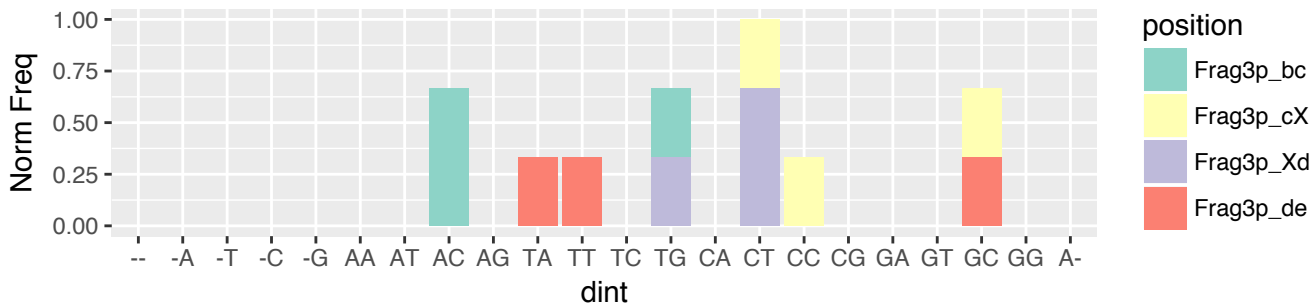

ESCA (n=813)  
 5'-half & exclusive (n=3)  
 3' terminus relative to 5' stem of A-loop (n=3)

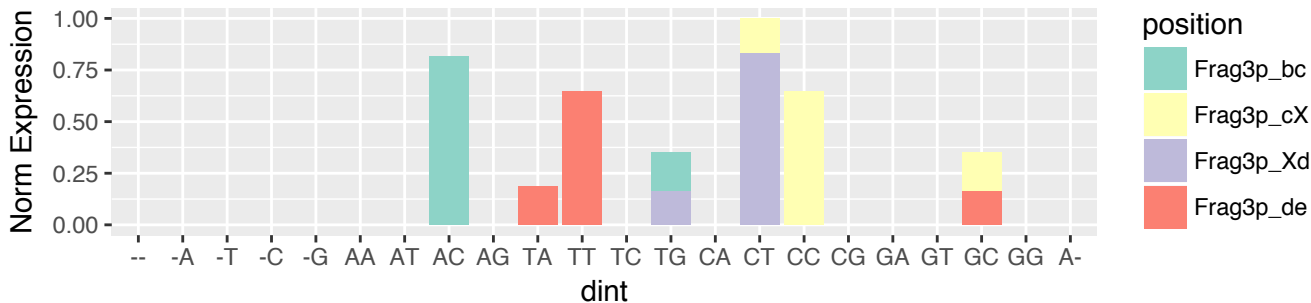

ESCA (n=813)  
 5'-tRF & exclusive (n=141)  
 5' terminus relative to 5' end of the tRNA (n=141)

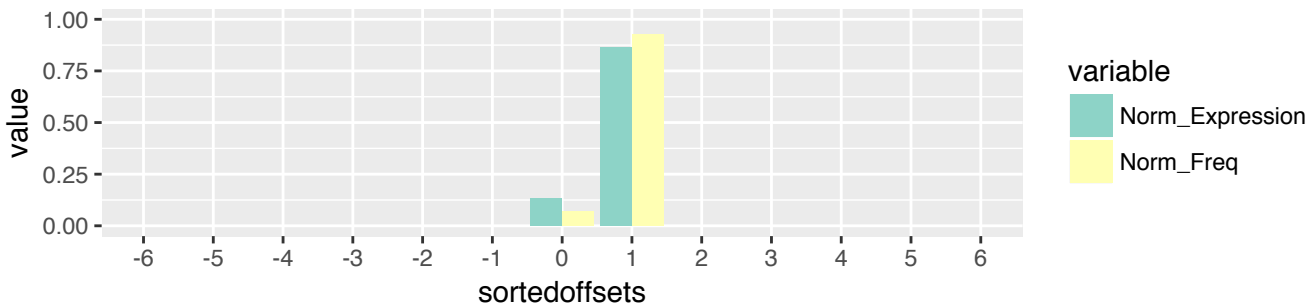

ESCA (n=813)  
 5'-tRF & exclusive (n=141)  
 5' terminus relative to 5' end of the tRNA (n=141)

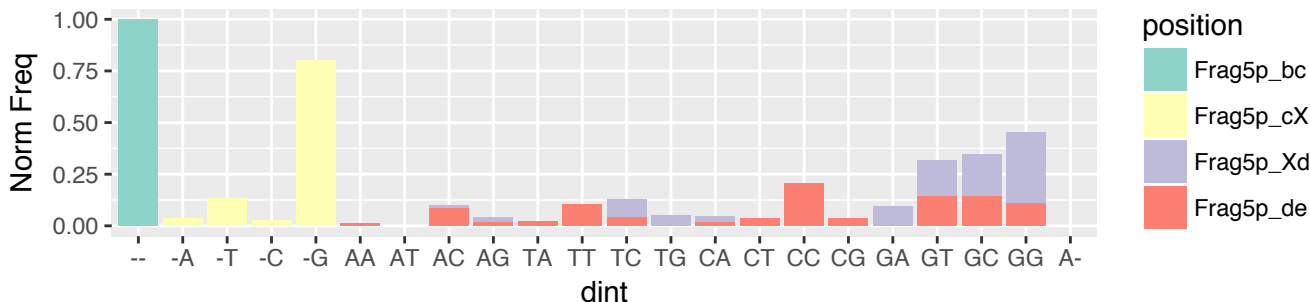

ESCA (n=813)  
 5'-tRF & exclusive (n=141)  
 5' terminus relative to 5' end of the tRNA (n=141)

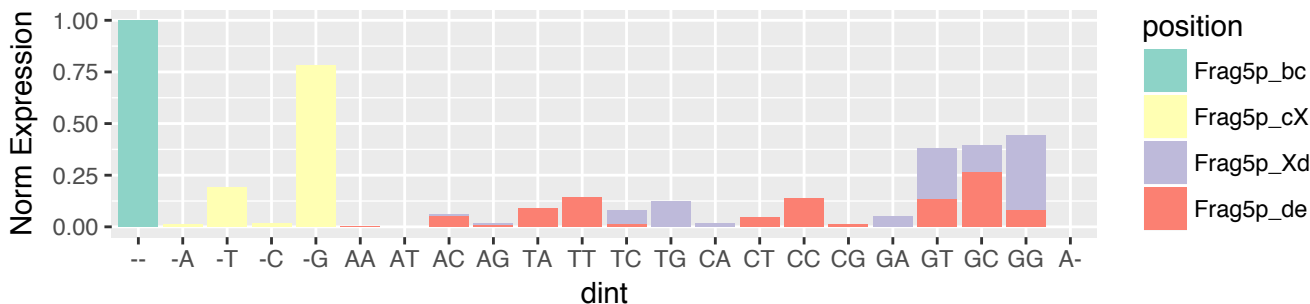

ESCA (n=813)  
 5'-tRF & exclusive (n=141)  
 3' terminus relative to 5' stem of D-loop (n=4)

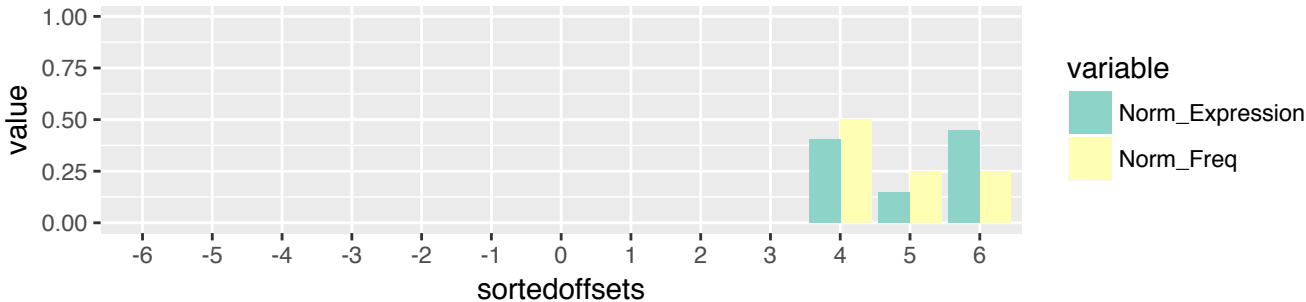

ESCA (n=813)  
 5'-tRF & exclusive (n=141)  
 3' terminus relative to 5' stem of D-loop (n=4)

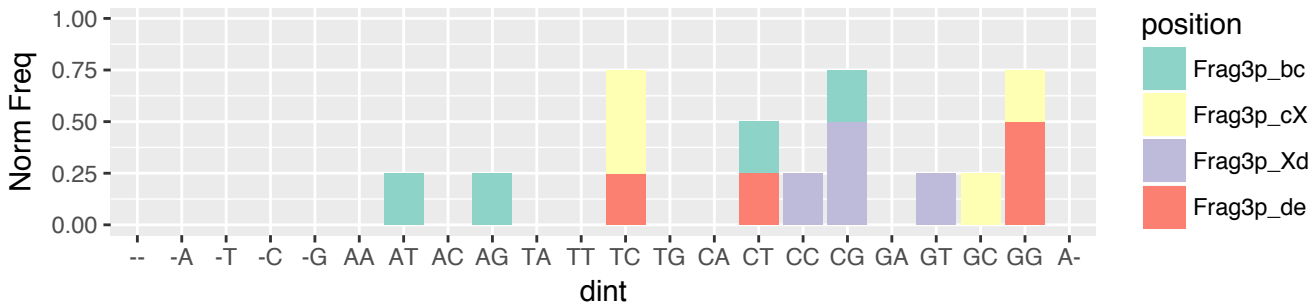

ESCA (n=813)  
 5'-tRF & exclusive (n=141)  
 3' terminus relative to 5' stem of D-loop (n=4)

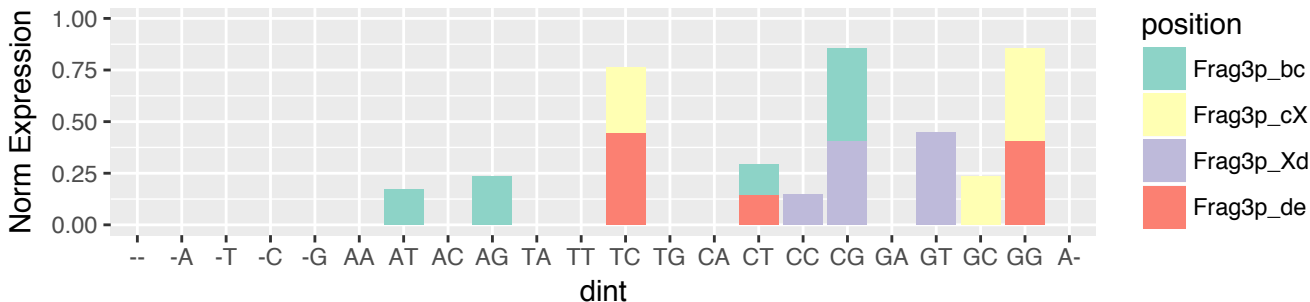

ESCA (n=813)  
 5'-tRF & exclusive (n=141)  
 3' terminus relative to 3' stem of D-loop (n=122)

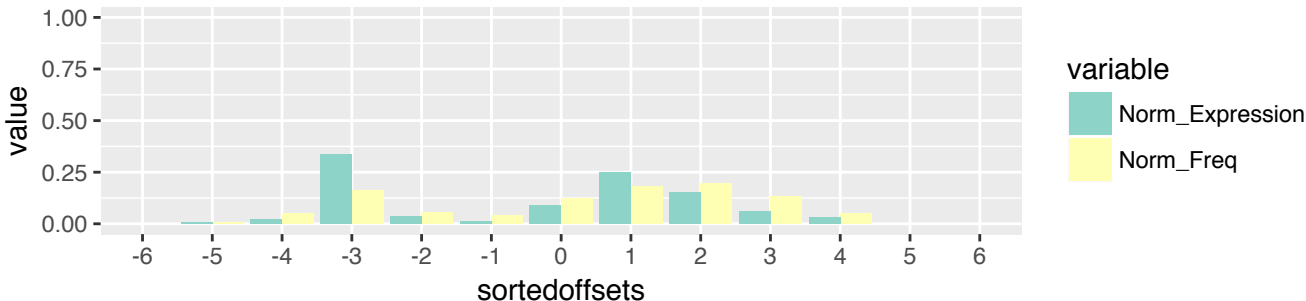

ESCA (n=813)  
 5'-tRF & exclusive (n=141)  
 3' terminus relative to 3' stem of D-loop (n=122)

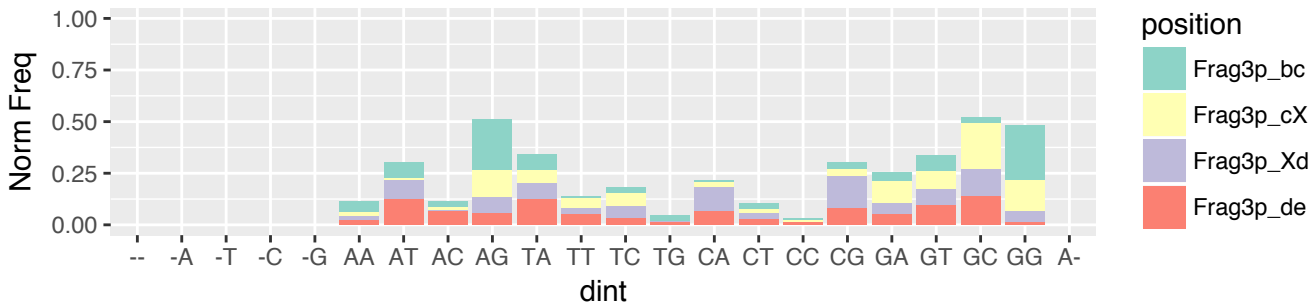

ESCA (n=813)  
 5'-tRF & exclusive (n=141)  
 3' terminus relative to 3' stem of D-loop (n=122)

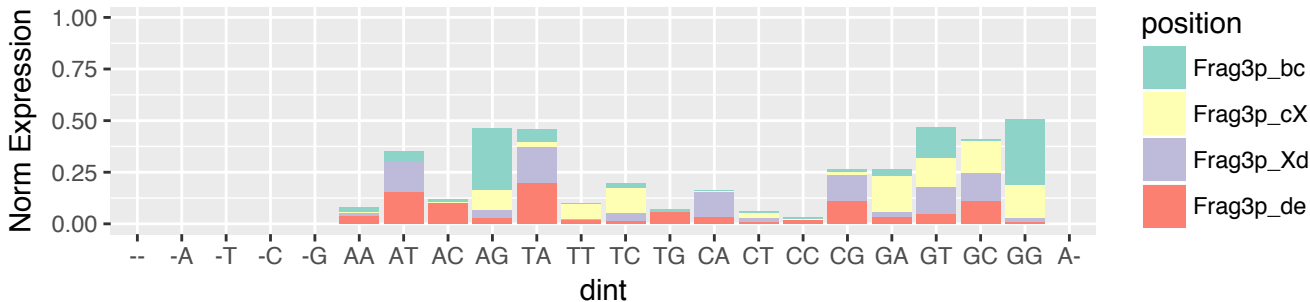

ESCA (n=813)  
 5'-tRF & exclusive (n=141)  
 3' terminus relative to 5' stem of A-loop (n=12)

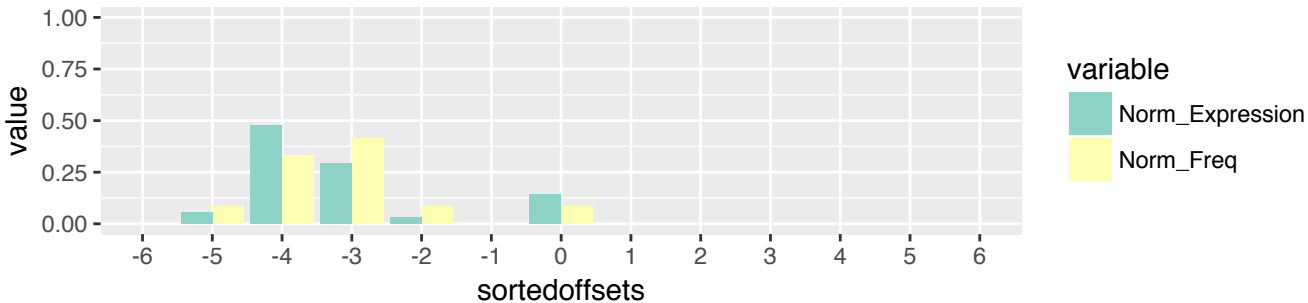

ESCA (n=813)  
 5'-tRF & exclusive (n=141)  
 3' terminus relative to 5' stem of A-loop (n=12)

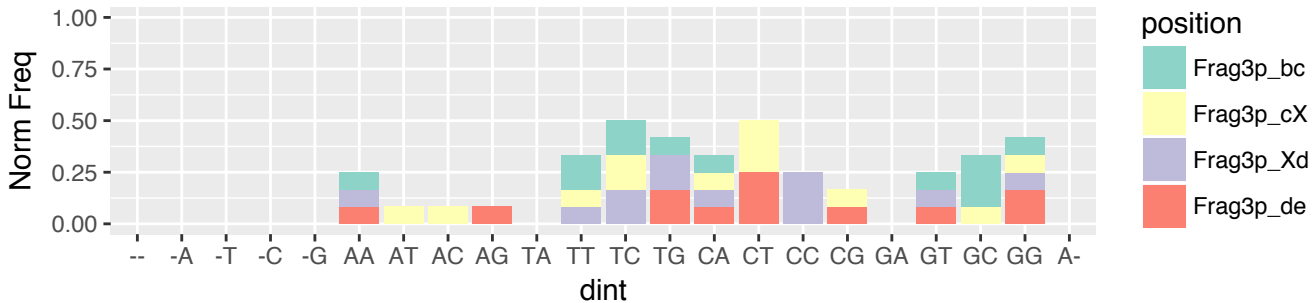

ESCA (n=813)  
 5'-tRF & exclusive (n=141)  
 3' terminus relative to 5' stem of A-loop (n=12)

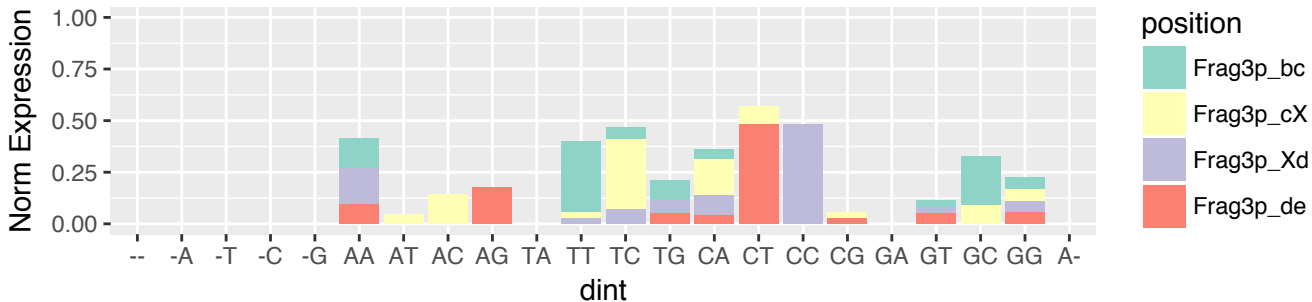

ESCA (n=813)  
 5'-tRF & exclusive (n=141)  
 3' terminus relative to 3' stem of A-loop (n=3)

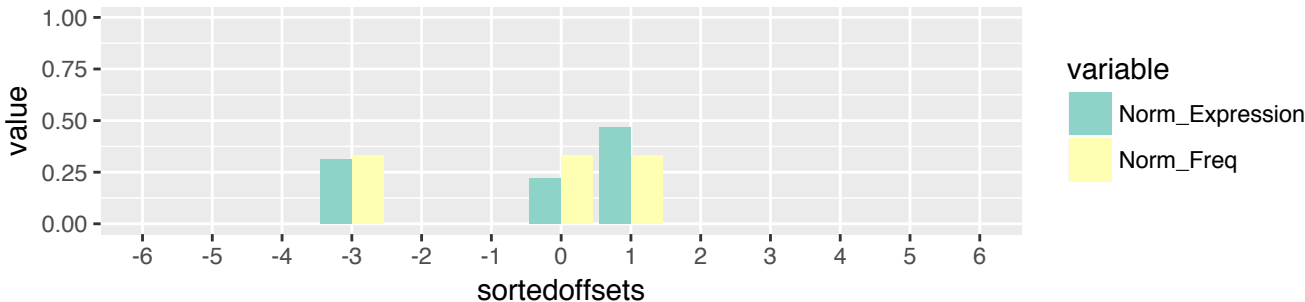

ESCA (n=813)  
 5'-tRF & exclusive (n=141)  
 3' terminus relative to 3' stem of A-loop (n=3)

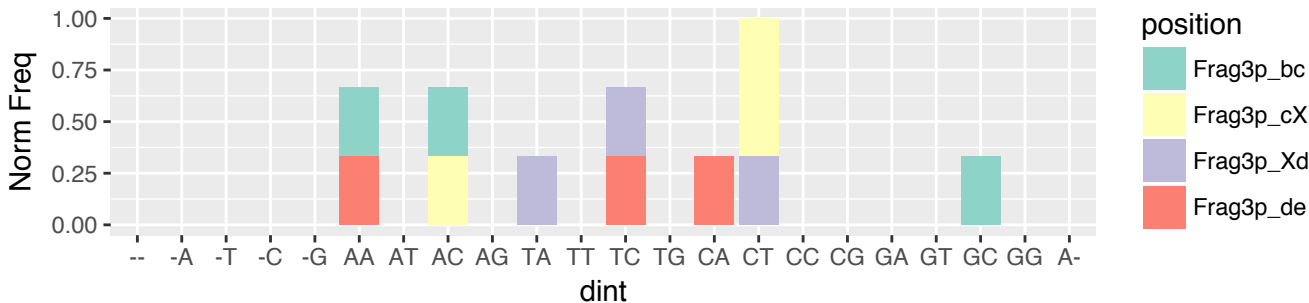

ESCA (n=813)  
 5'-tRF & exclusive (n=141)  
 3' terminus relative to 3' stem of A-loop (n=3)

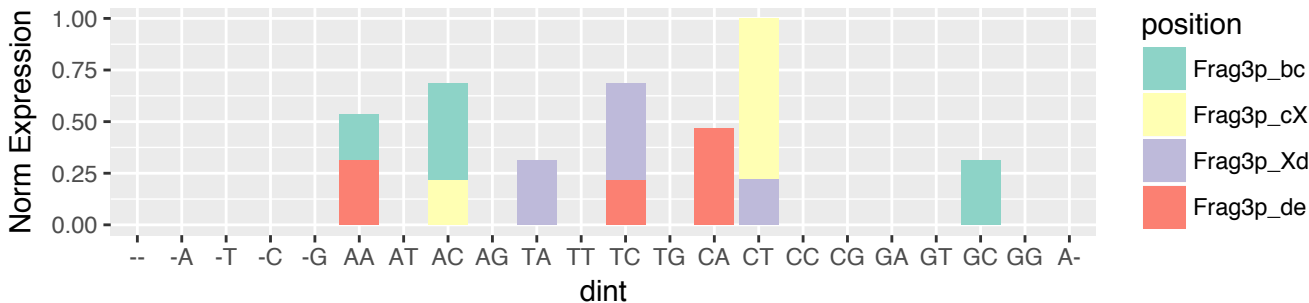



ESCA (n=813)  
 i-tRF & exclusive (n=187)  
 5' terminus relative to 5' end of the tRNA (n=8)

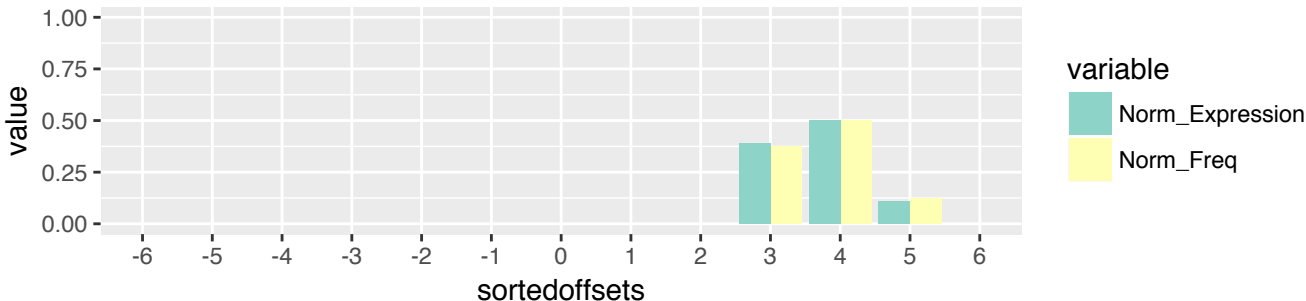

ESCA (n=813)  
 i-tRF & exclusive (n=187)  
 5' terminus relative to 5' end of the tRNA (n=8)

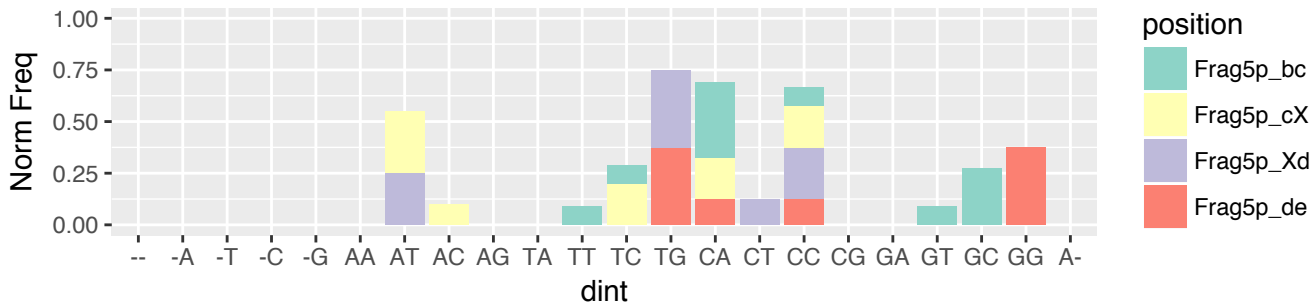

ESCA (n=813)  
 i-tRF & exclusive (n=187)  
 5' terminus relative to 5' end of the tRNA (n=8)

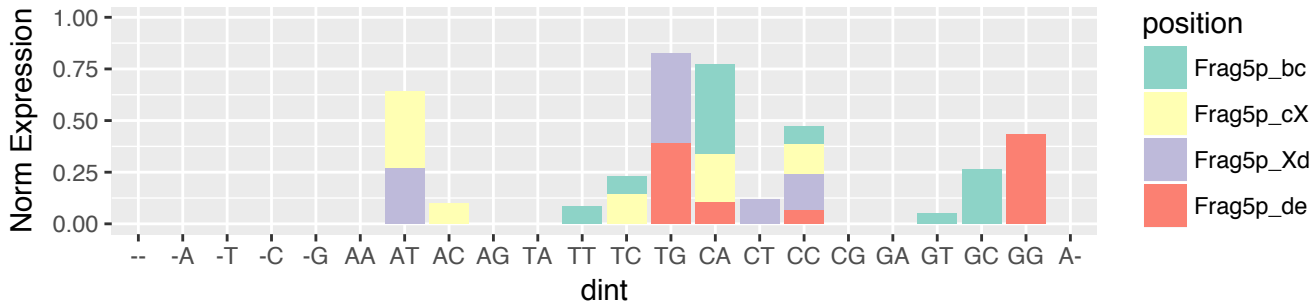

ESCA (n=813)  
 i-tRF & exclusive (n=187)  
 5' terminus relative to 5' stem of D-loop (n=73)

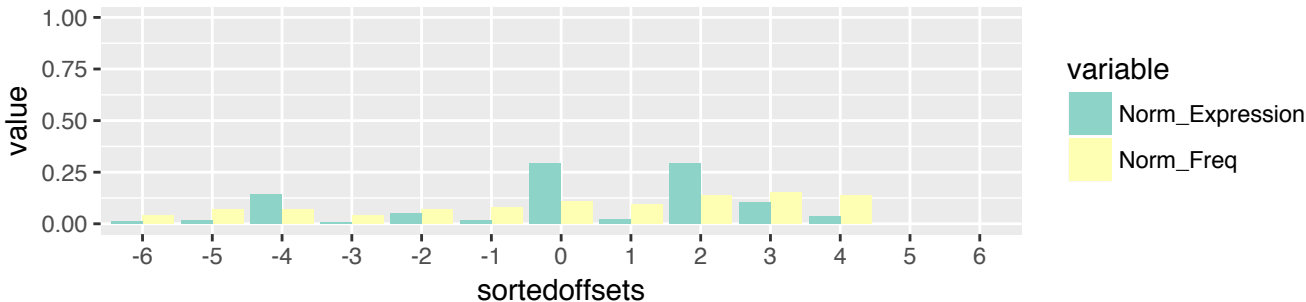

ESCA (n=813)  
 i-tRF & exclusive (n=187)  
 5' terminus relative to 5' stem of D-loop (n=73)

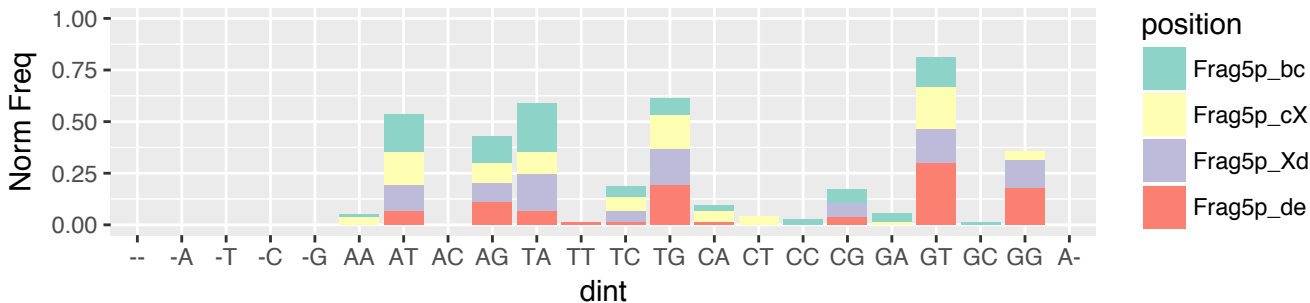

ESCA (n=813)  
 i-tRF & exclusive (n=187)  
 5' terminus relative to 5' stem of D-loop (n=73)

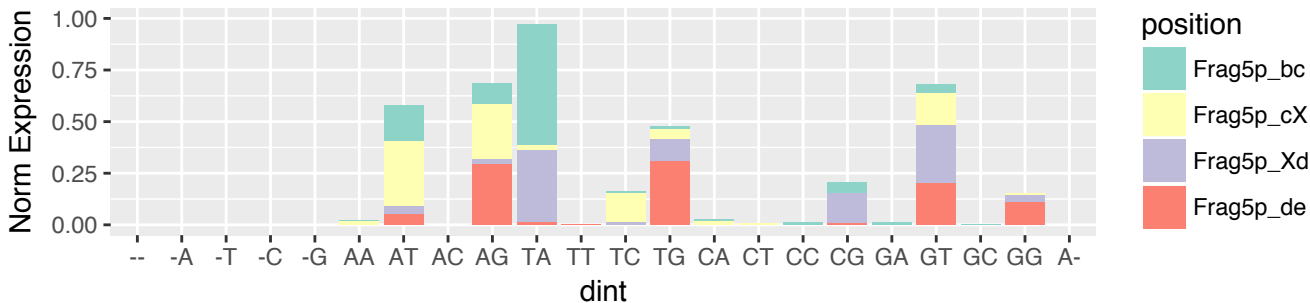

ESCA (n=813)  
 i-tRF & exclusive (n=187)  
 5' terminus relative to 3' stem of D-loop (n=9)

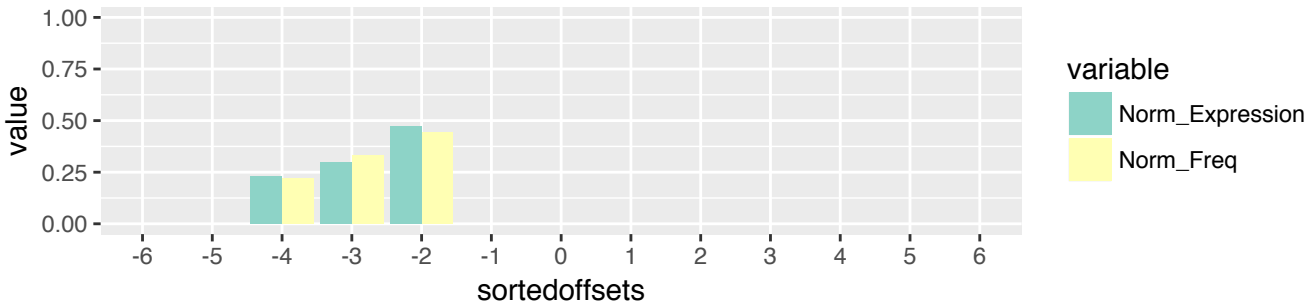

ESCA (n=813)  
 i-tRF & exclusive (n=187)  
 5' terminus relative to 3' stem of D-loop (n=9)

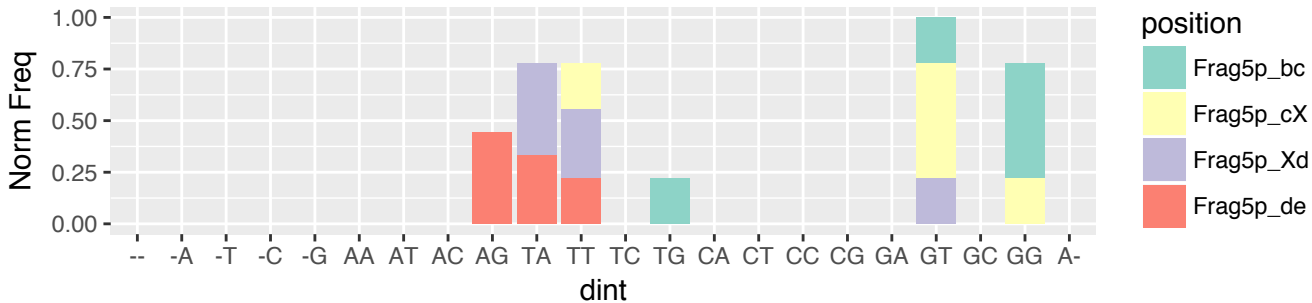

ESCA (n=813)  
 i-tRF & exclusive (n=187)  
 5' terminus relative to 3' stem of D-loop (n=9)

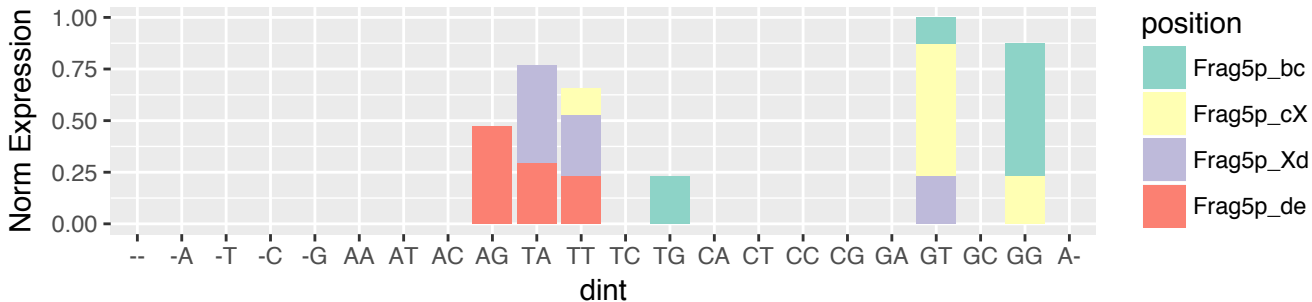

ESCA (n=813)  
 i-tRF & exclusive (n=187)  
 5' terminus relative to 5' stem of A-loop (n=27)

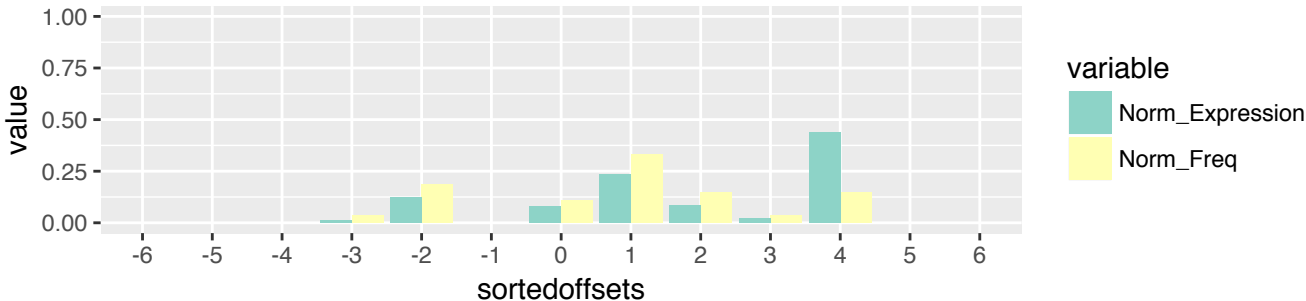

ESCA (n=813)  
 i-tRF & exclusive (n=187)  
 5' terminus relative to 5' stem of A-loop (n=27)

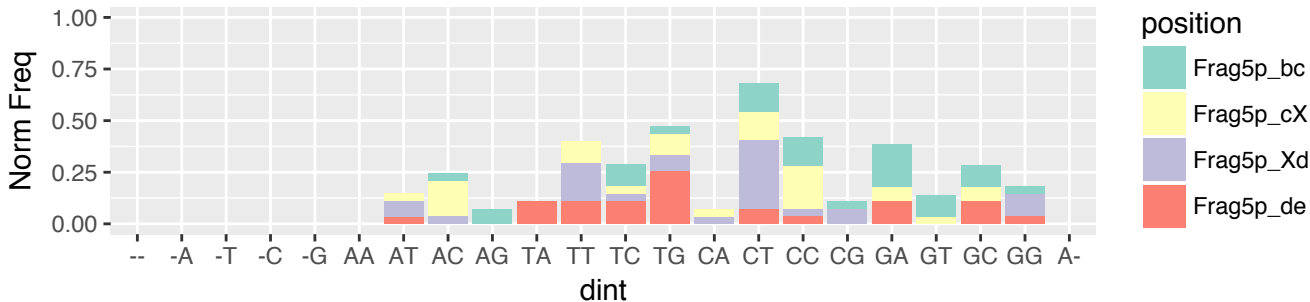

ESCA (n=813)  
 i-tRF & exclusive (n=187)  
 5' terminus relative to 5' stem of A-loop (n=27)

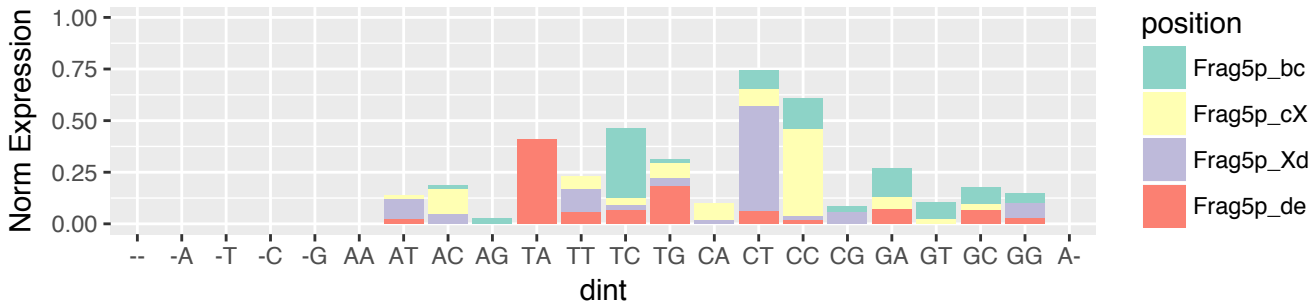

ESCA (n=813)  
 i-tRF & exclusive (n=187)  
 5' terminus relative to 3' stem of A-loop (n=57)

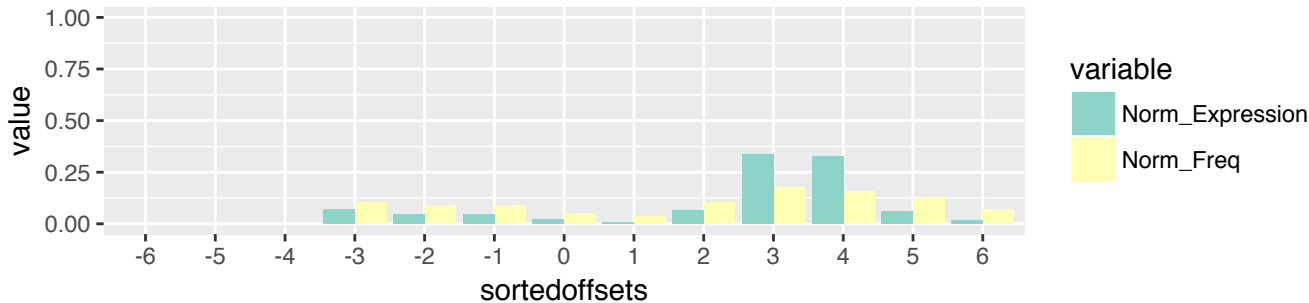

ESCA (n=813)  
 i-tRF & exclusive (n=187)  
 5' terminus relative to 3' stem of A-loop (n=57)

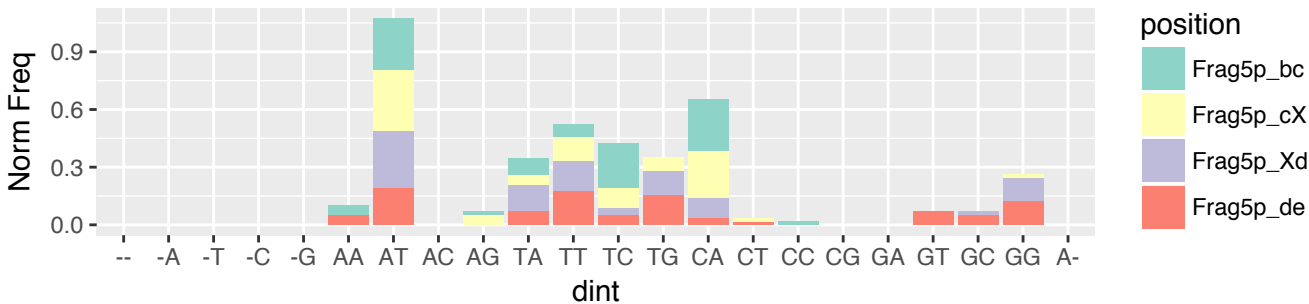

ESCA (n=813)  
 i-tRF & exclusive (n=187)  
 5' terminus relative to 3' stem of A-loop (n=57)

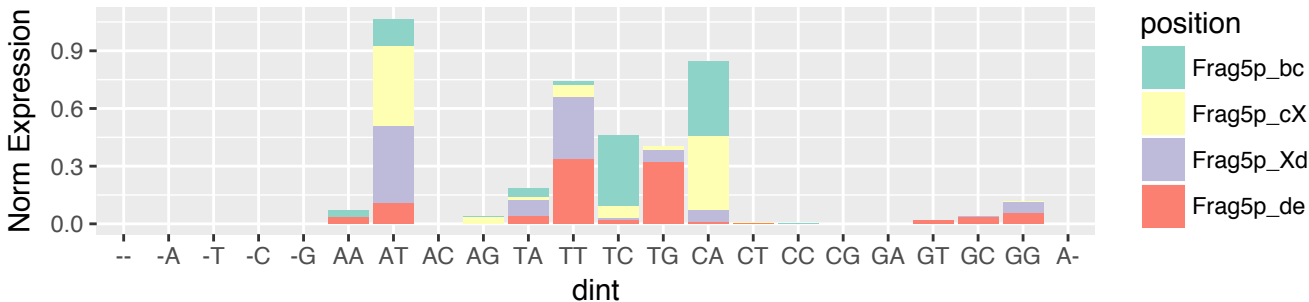

ESCA (n=813)  
i-tRF & exclusive (n=187)  
5' terminus relative to 5' stem of T-loop (n=13)

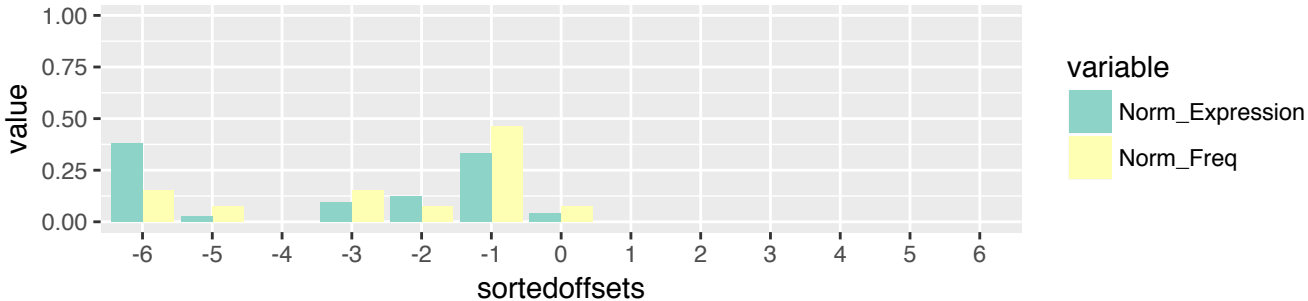

ESCA (n=813)  
i-tRF & exclusive (n=187)  
5' terminus relative to 5' stem of T-loop (n=13)

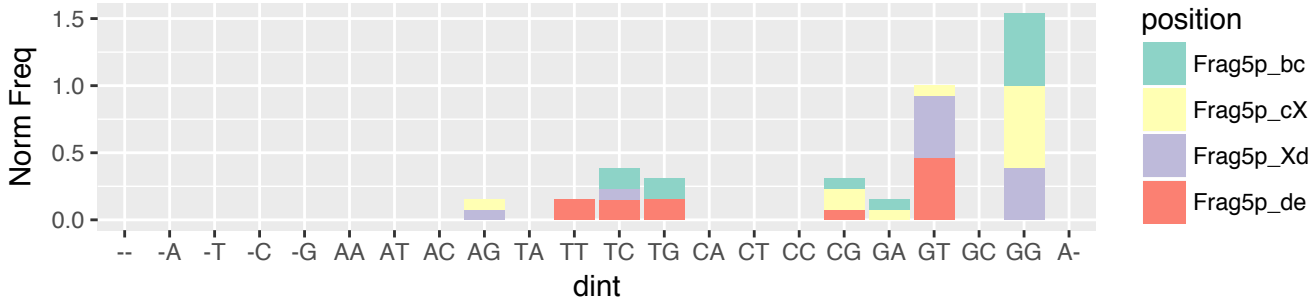

ESCA (n=813)  
i-tRF & exclusive (n=187)  
5' terminus relative to 5' stem of T-loop (n=13)

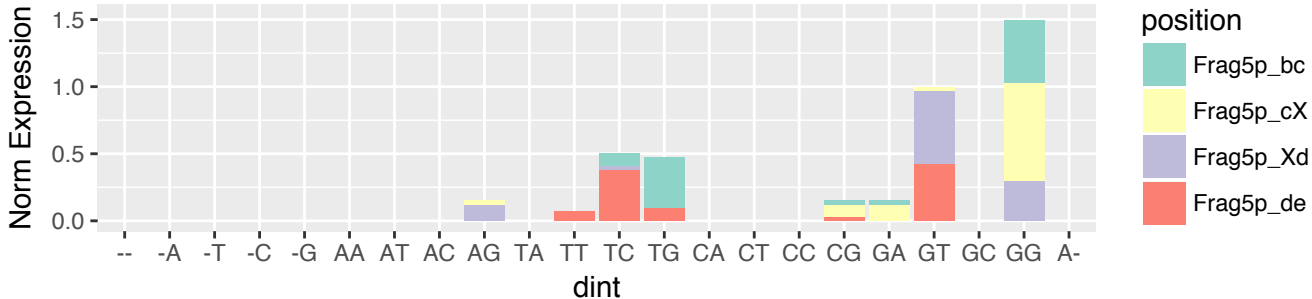

ESCA (n=813)  
 i-tRF & exclusive (n=187)  
 3' terminus relative to 5' stem of A-loop (n=63)

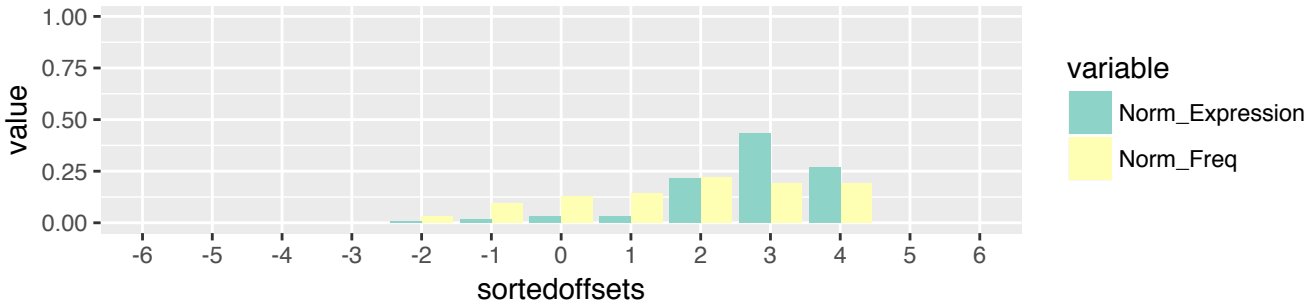

ESCA (n=813)  
 i-tRF & exclusive (n=187)  
 3' terminus relative to 5' stem of A-loop (n=63)

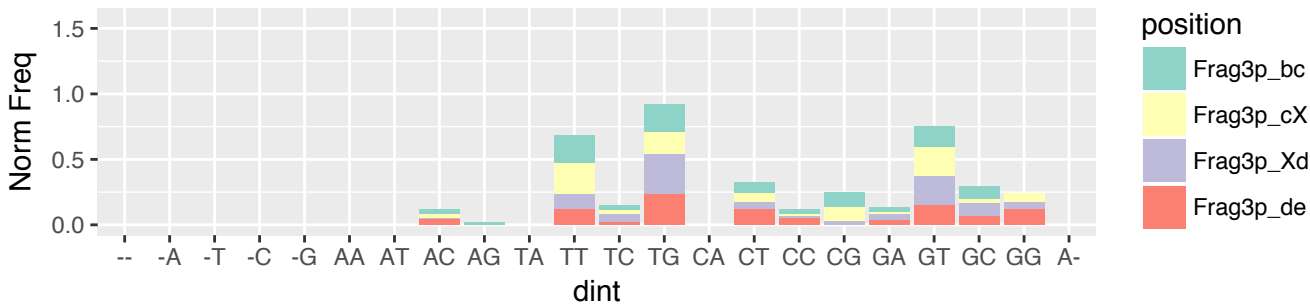

ESCA (n=813)  
 i-tRF & exclusive (n=187)  
 3' terminus relative to 5' stem of A-loop (n=63)

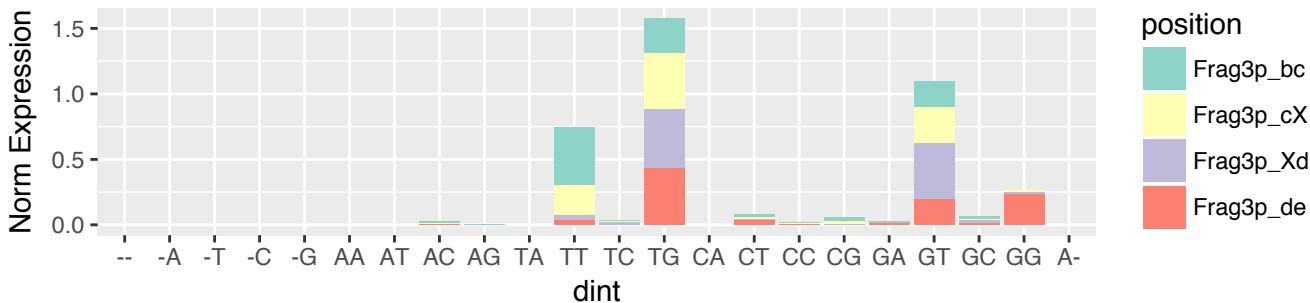

ESCA (n=813)  
 i-tRF & exclusive (n=187)  
 3' terminus relative to 3' stem of A-loop (n=29)

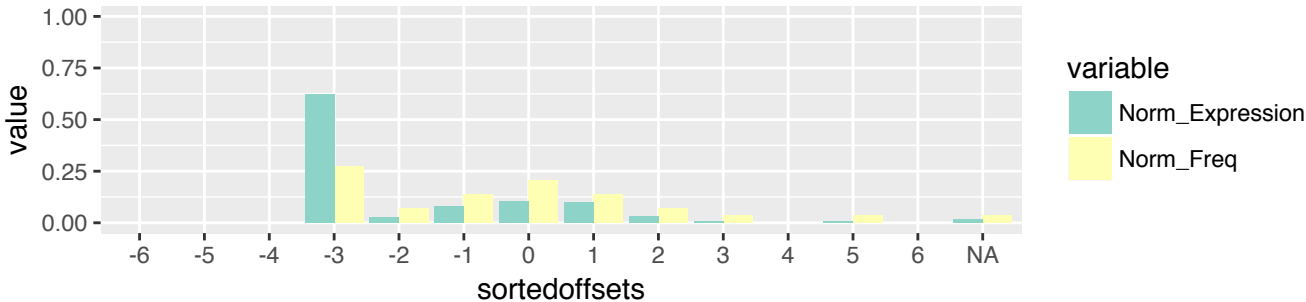

ESCA (n=813)  
 i-tRF & exclusive (n=187)  
 3' terminus relative to 3' stem of A-loop (n=29)

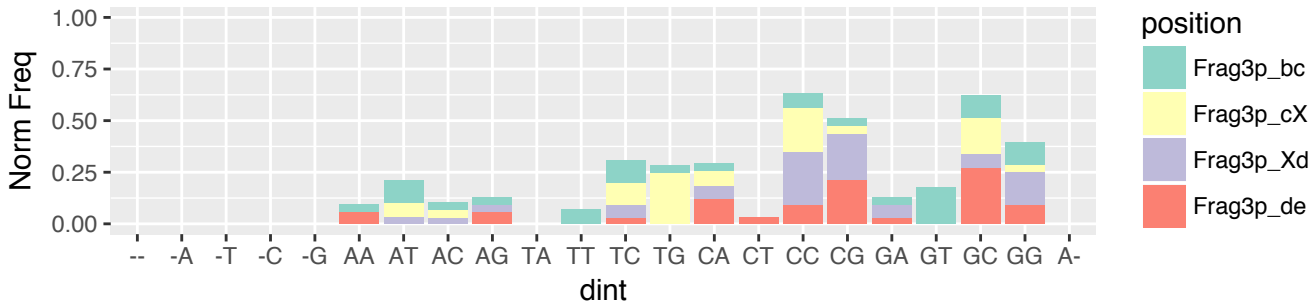

ESCA (n=813)  
 i-tRF & exclusive (n=187)  
 3' terminus relative to 3' stem of A-loop (n=29)

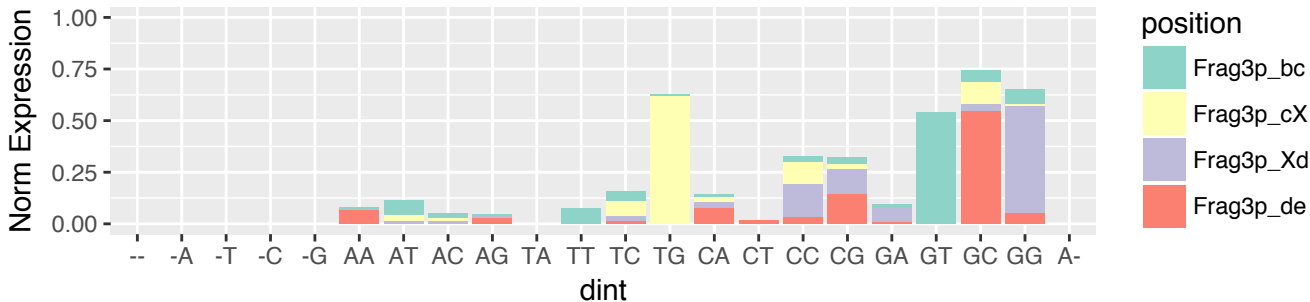



ESCA (n=813)  
i-tRF & exclusive (n=187)  
3' terminus relative to 5' stem of T-loop (n=32)

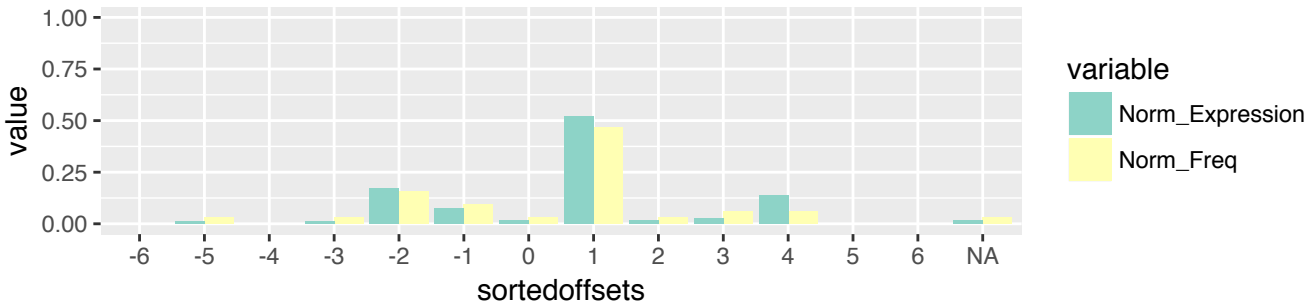

ESCA (n=813)  
i-tRF & exclusive (n=187)  
3' terminus relative to 5' stem of T-loop (n=32)

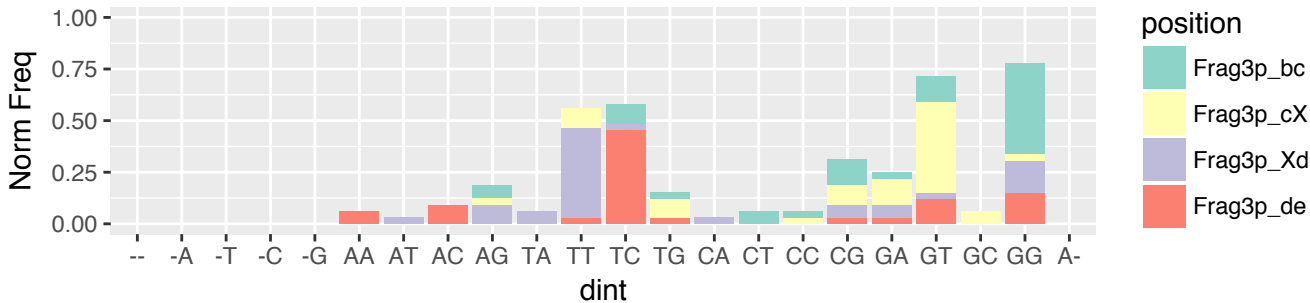

ESCA (n=813)  
i-tRF & exclusive (n=187)  
3' terminus relative to 5' stem of T-loop (n=32)

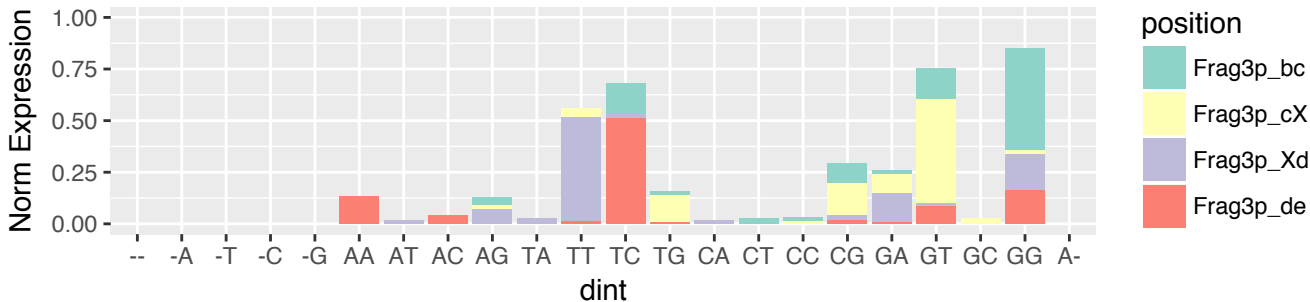

ESCA (n=813)  
i-tRF & exclusive (n=187)  
3' terminus relative to 3' stem of T-loop (n=41)

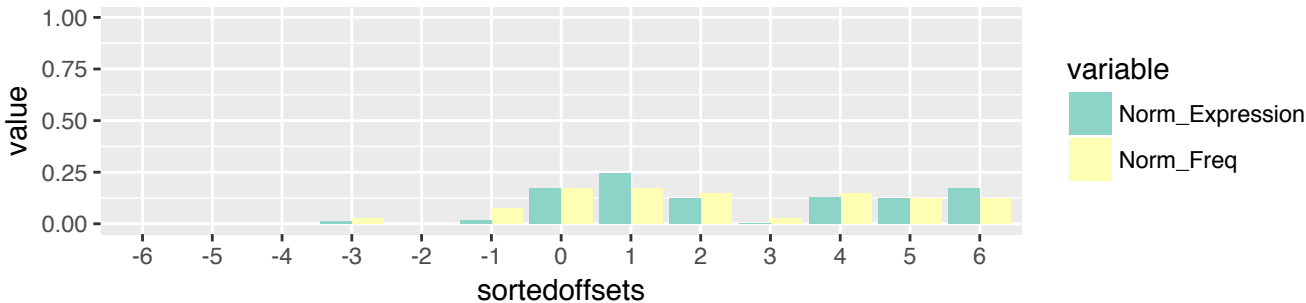

ESCA (n=813)  
i-tRF & exclusive (n=187)  
3' terminus relative to 3' stem of T-loop (n=41)

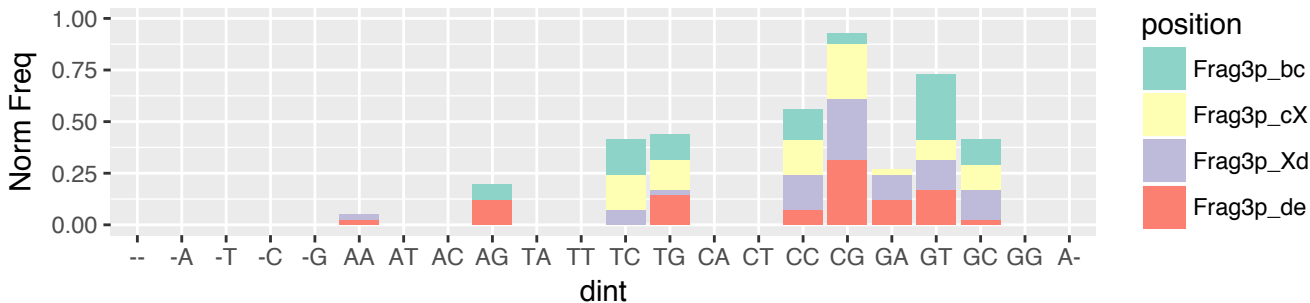

ESCA (n=813)  
i-tRF & exclusive (n=187)  
3' terminus relative to 3' stem of T-loop (n=41)

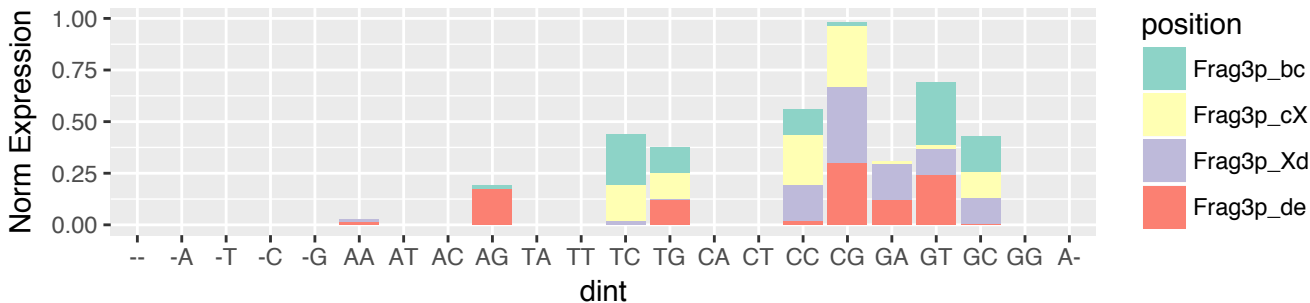

ESCA (n=813)  
 i-tRF & exclusive (n=187)  
 3' terminus relative to 3' end of the tRNA (n=23)

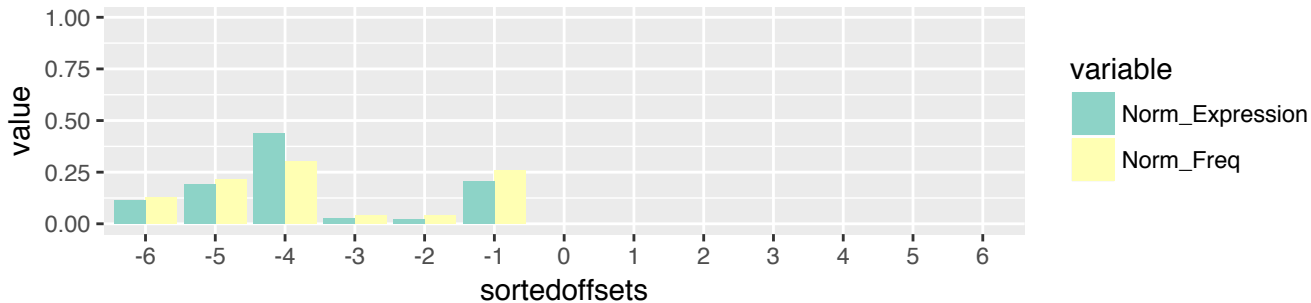

ESCA (n=813)  
 i-tRF & exclusive (n=187)  
 3' terminus relative to 3' end of the tRNA (n=23)

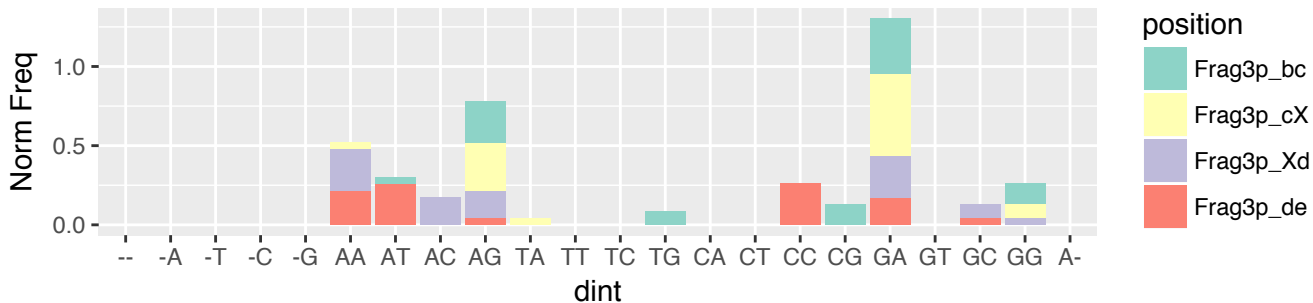

ESCA (n=813)  
 i-tRF & exclusive (n=187)  
 3' terminus relative to 3' end of the tRNA (n=23)

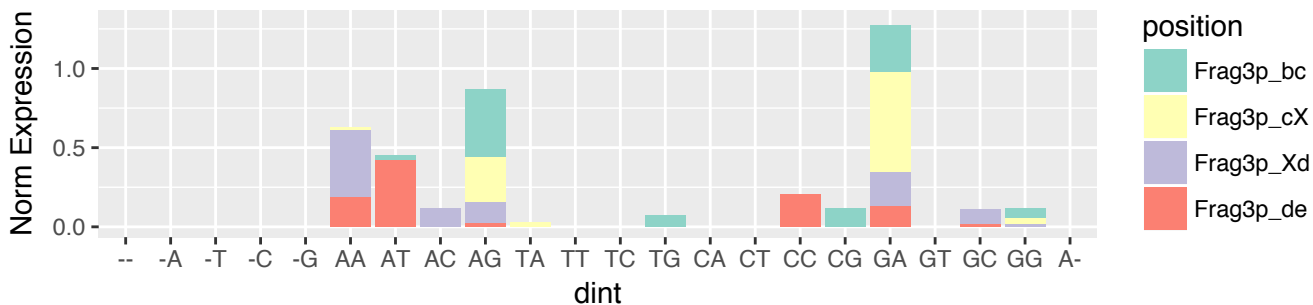

ESCA (n=813)  
 3'-tRF & exclusive (n=127)  
 5' terminus relative to 5' stem of T-loop (n=98)

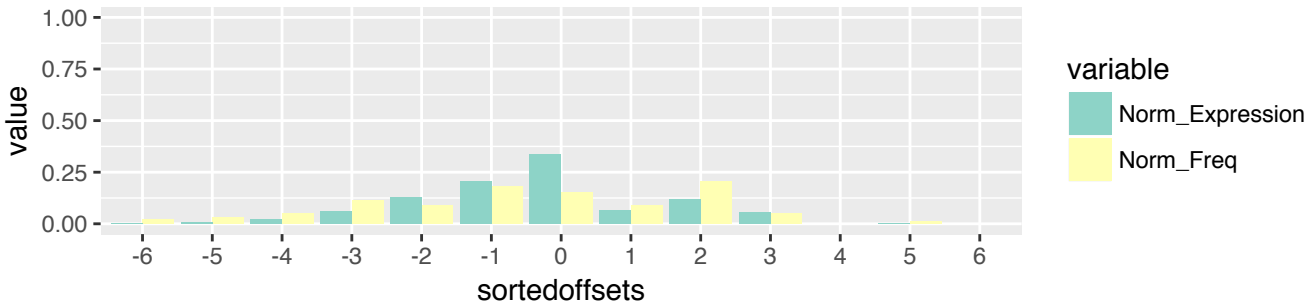

ESCA (n=813)  
 3'-tRF & exclusive (n=127)  
 5' terminus relative to 5' stem of T-loop (n=98)

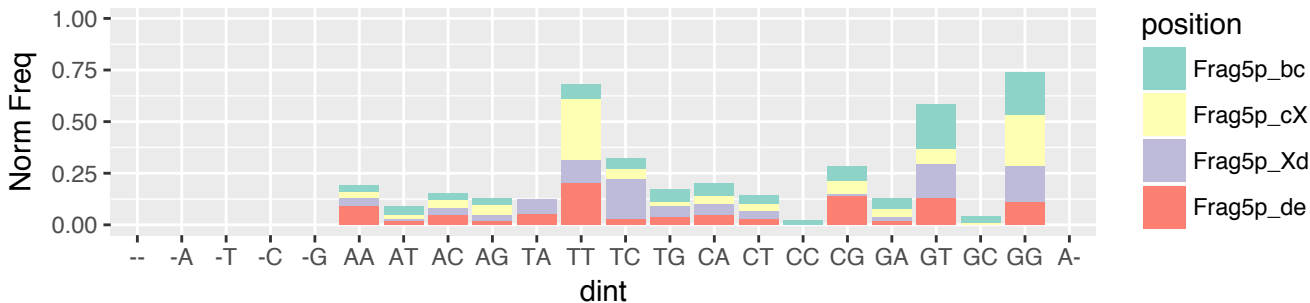

ESCA (n=813)  
 3'-tRF & exclusive (n=127)  
 5' terminus relative to 5' stem of T-loop (n=98)

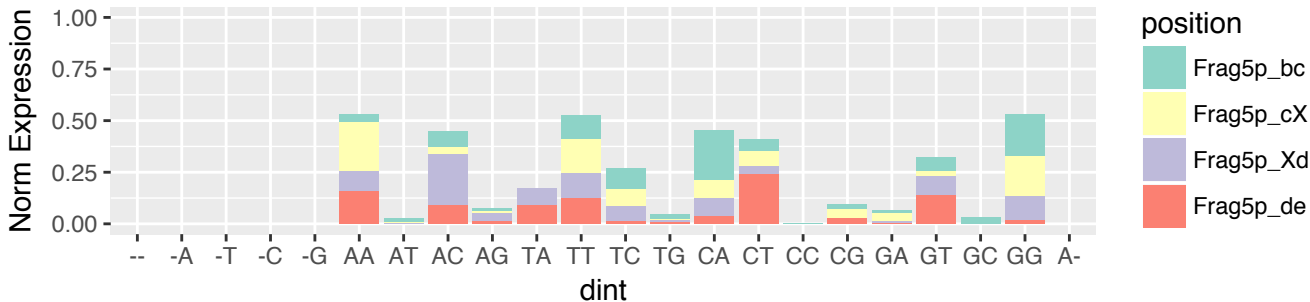

ESCA (n=813)  
 3'-tRF & exclusive (n=127)  
 5' terminus relative to 3' stem of T-loop (n=29)

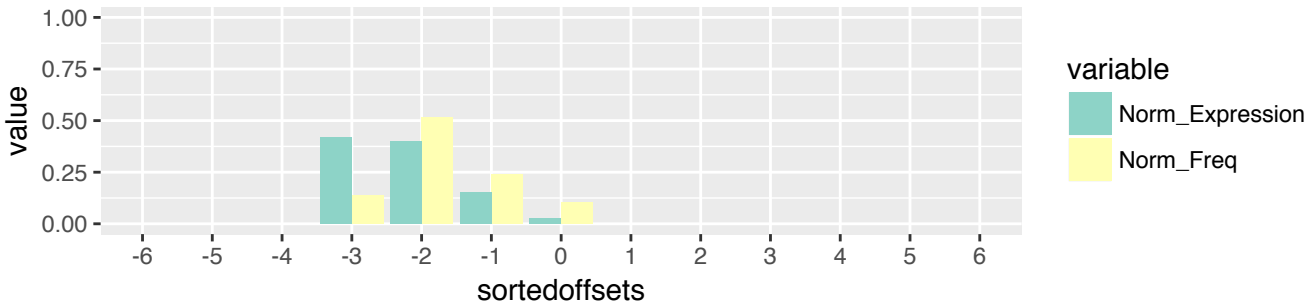

ESCA (n=813)  
 3'-tRF & exclusive (n=127)  
 5' terminus relative to 3' stem of T-loop (n=29)

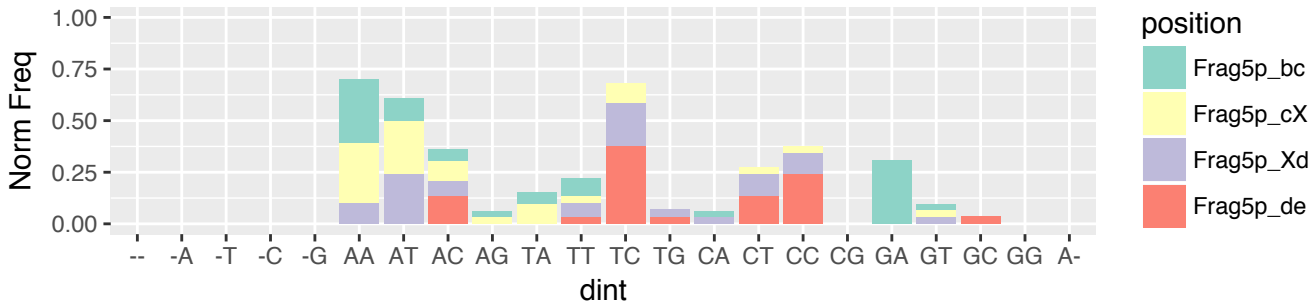

ESCA (n=813)  
 3'-tRF & exclusive (n=127)  
 5' terminus relative to 3' stem of T-loop (n=29)

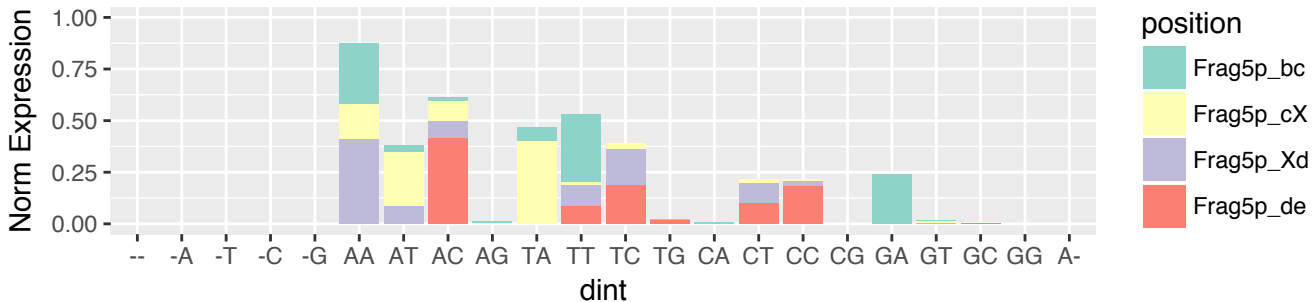

ESCA (n=813)  
 3'-tRF & exclusive (n=127)  
 3' terminus relative to 3' end of the tRNA (n=127)

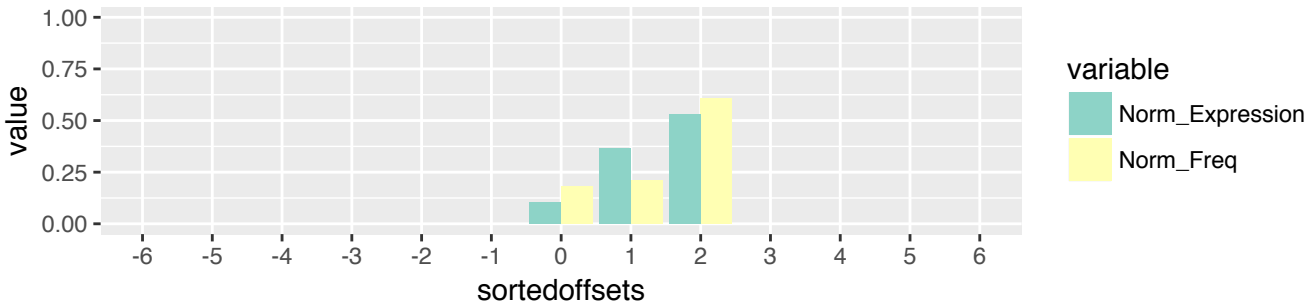

ESCA (n=813)  
 3'-tRF & exclusive (n=127)  
 3' terminus relative to 3' end of the tRNA (n=127)

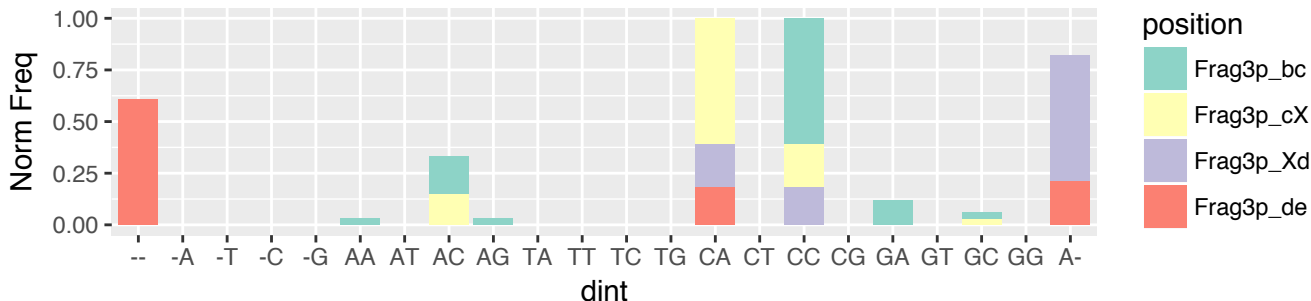

ESCA (n=813)  
 3'-tRF & exclusive (n=127)  
 3' terminus relative to 3' end of the tRNA (n=127)

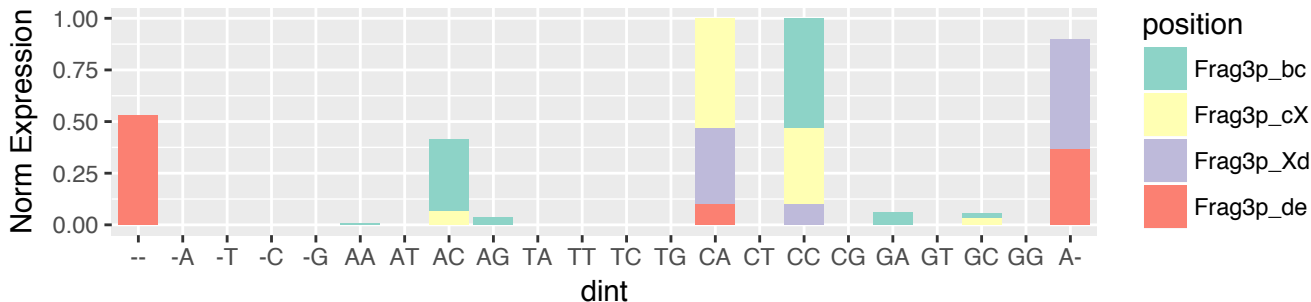

HNSC (n=1291)

5'-half & exclusive (n=4)

5' terminus relative to 5' end of the tRNA (n=4)

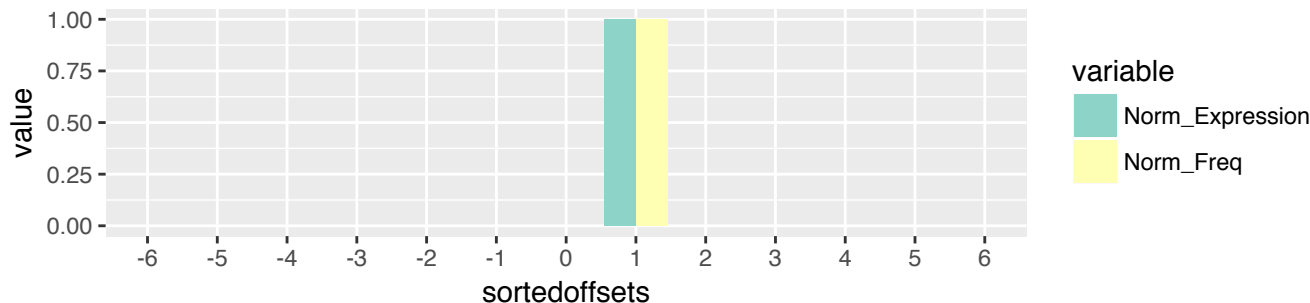

HNSC (n=1291)

5'-half & exclusive (n=4)

5' terminus relative to 5' end of the tRNA (n=4)



HNSC (n=1291)

5'-half & exclusive (n=4)

5' terminus relative to 5' end of the tRNA (n=4)

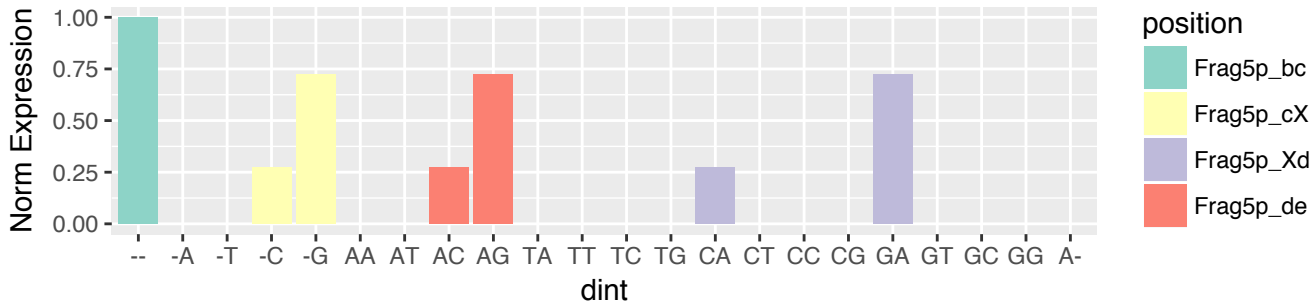

HNSC (n=1291)

5'-half & exclusive (n=4)

3' terminus relative to 5' stem of A-loop (n=4)

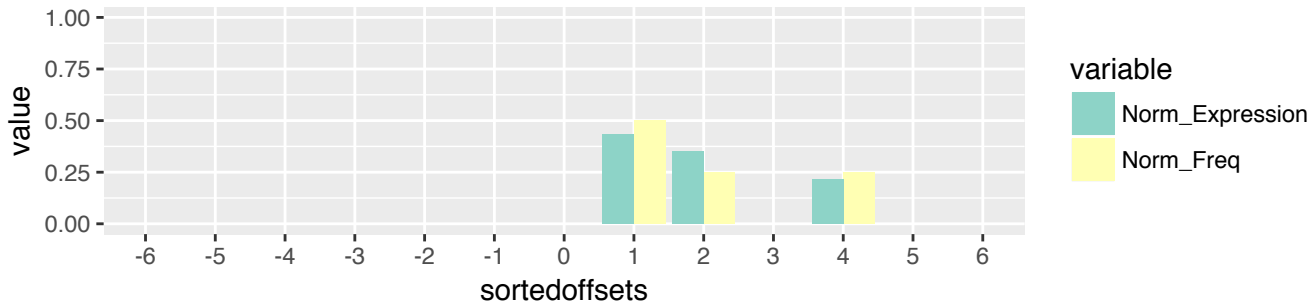

HNSC (n=1291)

5'-half & exclusive (n=4)

3' terminus relative to 5' stem of A-loop (n=4)

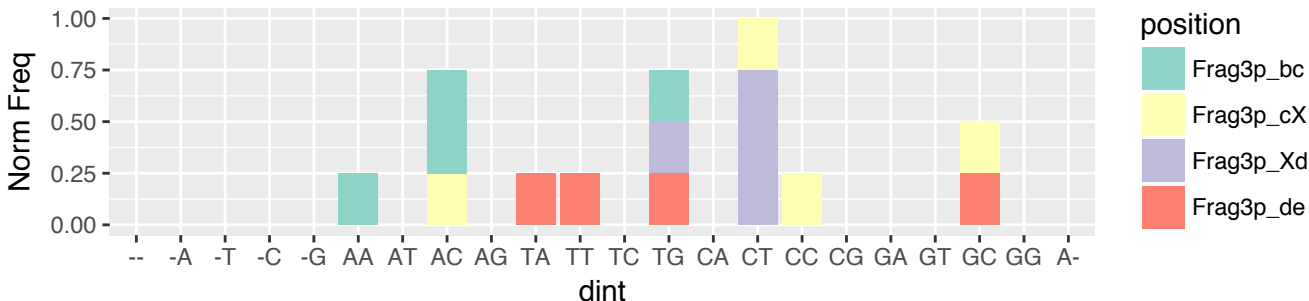

HNSC (n=1291)

5'-half & exclusive (n=4)

3' terminus relative to 5' stem of A-loop (n=4)

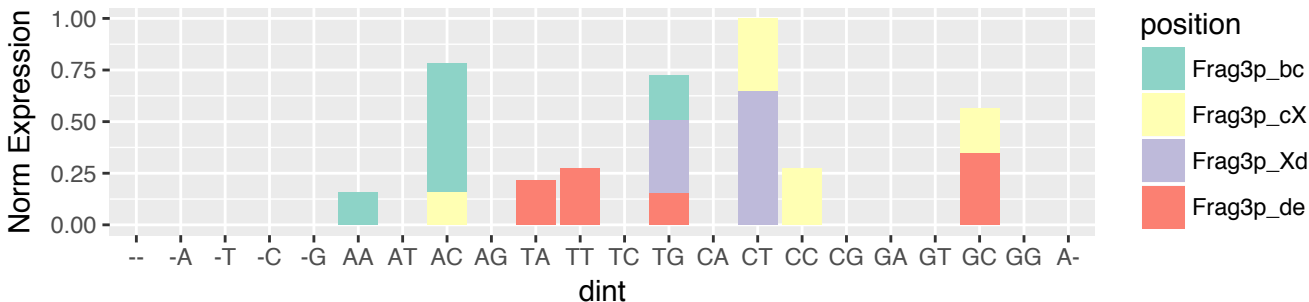



HNSC (n=1291)  
 5'-tRF & exclusive (n=174)  
 5' terminus relative to 5' end of the tRNA (n=174)

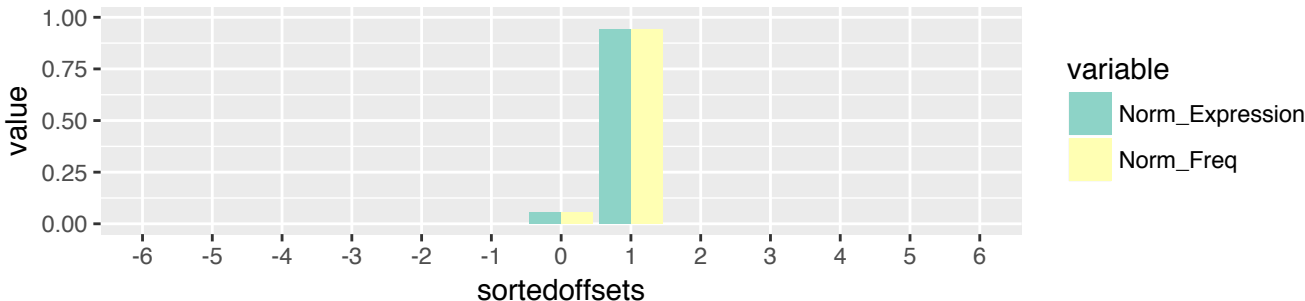

HNSC (n=1291)  
 5'-tRF & exclusive (n=174)  
 5' terminus relative to 5' end of the tRNA (n=174)

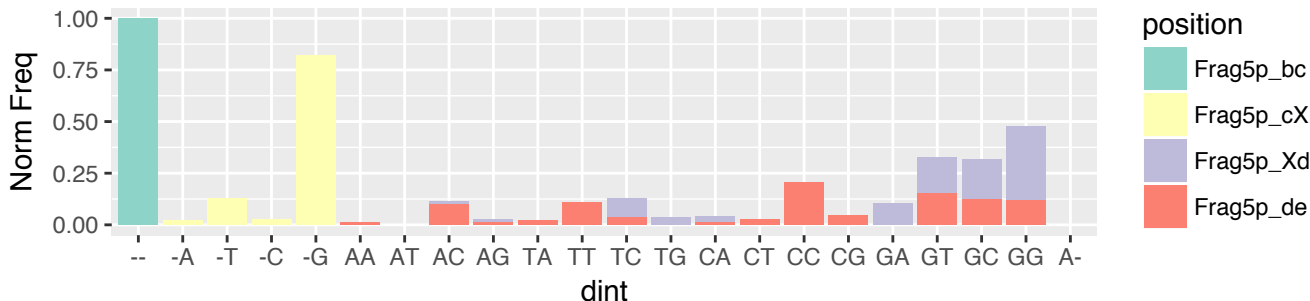

HNSC (n=1291)  
 5'-tRF & exclusive (n=174)  
 5' terminus relative to 5' end of the tRNA (n=174)

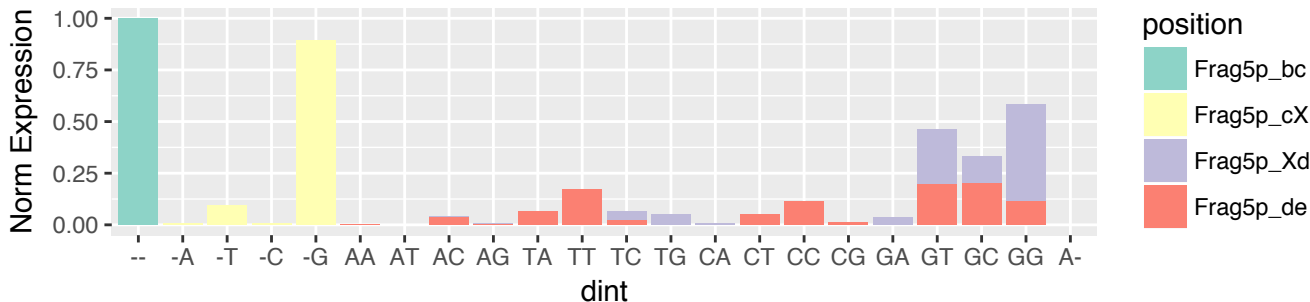

HNSC (n=1291)  
 5'-tRF & exclusive (n=174)  
 3' terminus relative to 5' stem of D-loop (n=12)

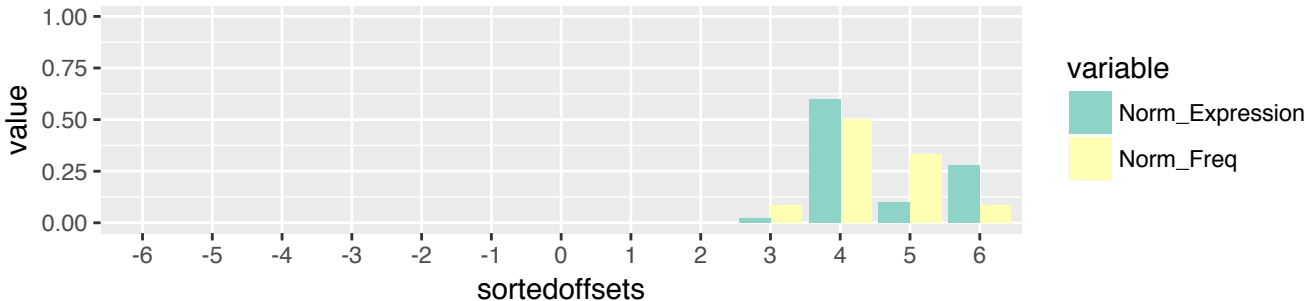

HNSC (n=1291)  
 5'-tRF & exclusive (n=174)  
 3' terminus relative to 5' stem of D-loop (n=12)

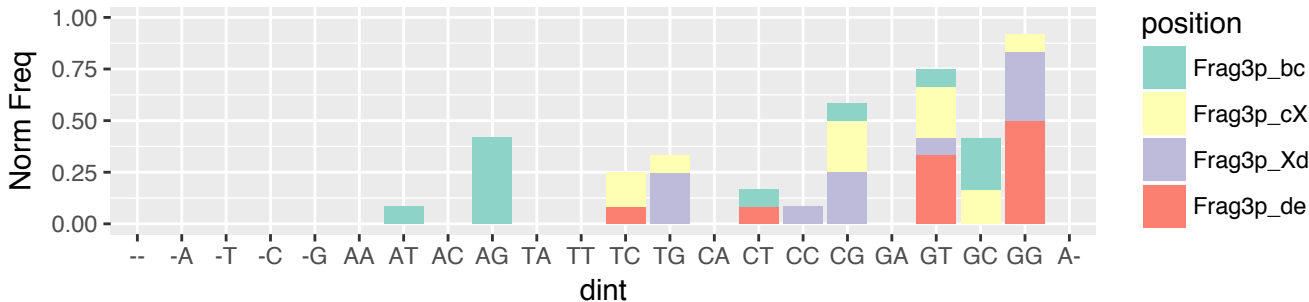

HNSC (n=1291)  
 5'-tRF & exclusive (n=174)  
 3' terminus relative to 5' stem of D-loop (n=12)

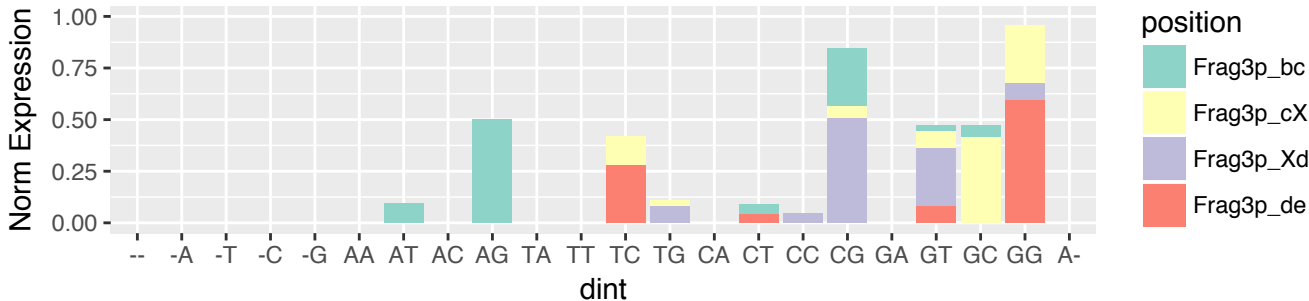

HNSC (n=1291)  
 5'-tRF & exclusive (n=174)  
 3' terminus relative to 3' stem of D-loop (n=149)

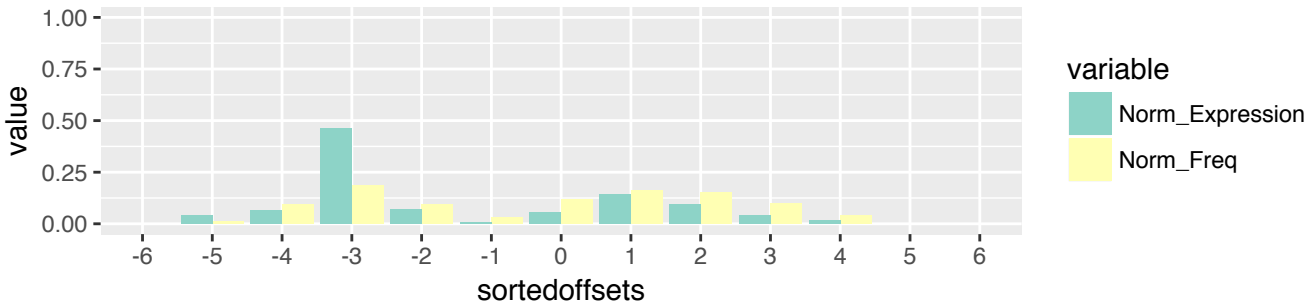

HNSC (n=1291)  
 5'-tRF & exclusive (n=174)  
 3' terminus relative to 3' stem of D-loop (n=149)

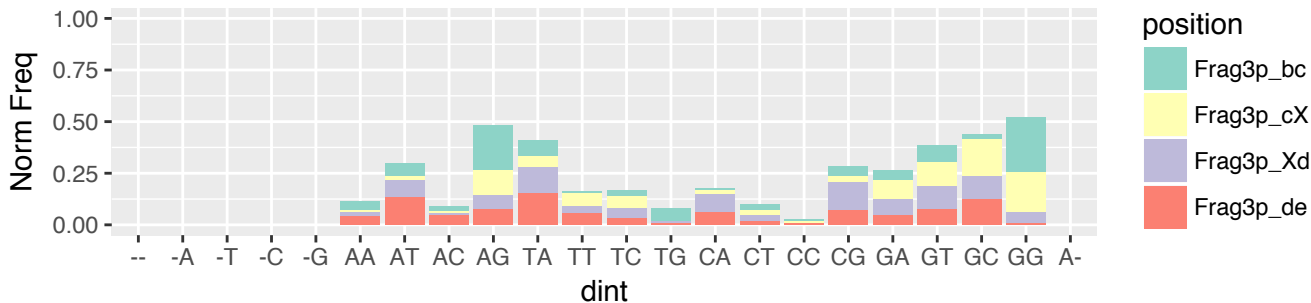

HNSC (n=1291)  
 5'-tRF & exclusive (n=174)  
 3' terminus relative to 3' stem of D-loop (n=149)

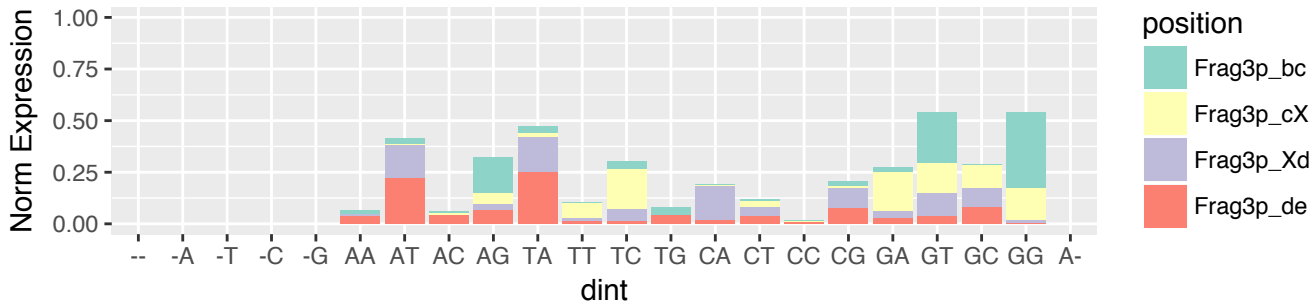

HNSC (n=1291)  
 5'-tRF & exclusive (n=174)  
 3' terminus relative to 5' stem of A-loop (n=10)

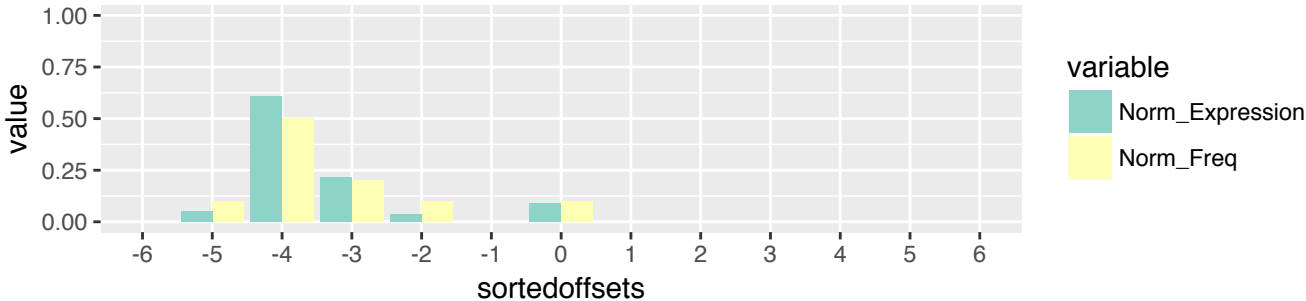

HNSC (n=1291)  
 5'-tRF & exclusive (n=174)  
 3' terminus relative to 5' stem of A-loop (n=10)

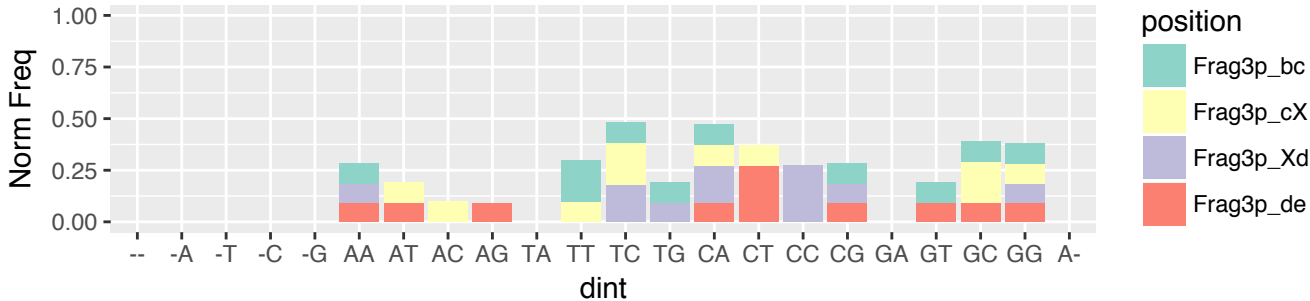

HNSC (n=1291)  
 5'-tRF & exclusive (n=174)  
 3' terminus relative to 5' stem of A-loop (n=10)

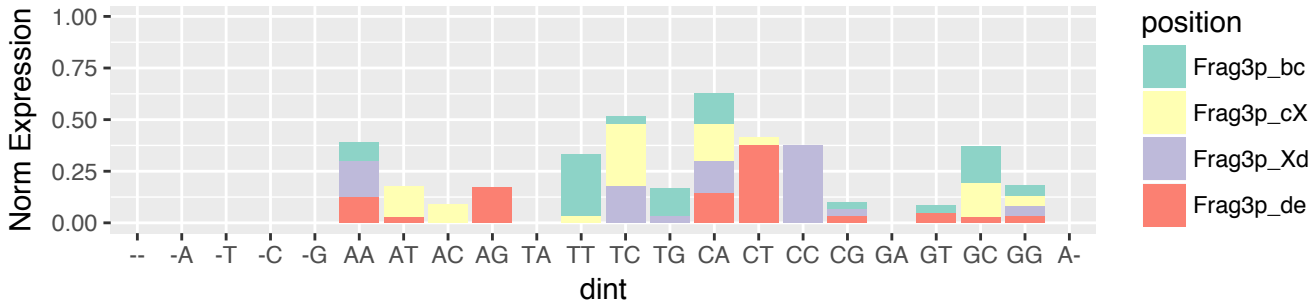

HNSC (n=1291)  
 5'-tRF & exclusive (n=174)  
 3' terminus relative to 3' stem of A-loop (n=3)

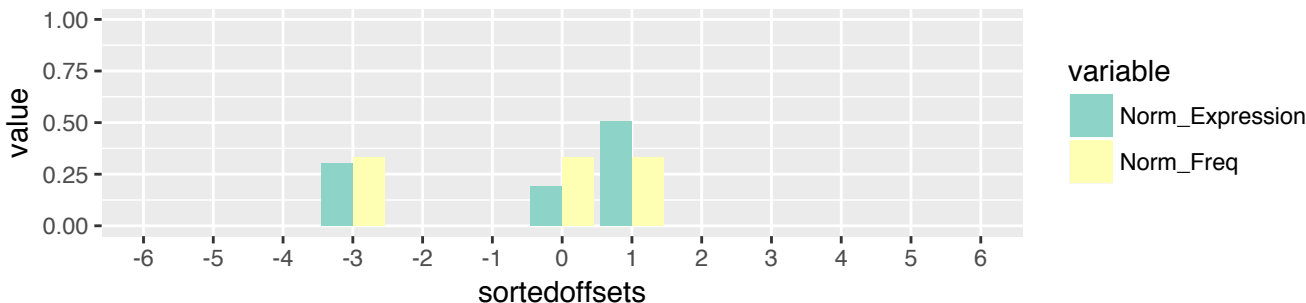

HNSC (n=1291)  
 5'-tRF & exclusive (n=174)  
 3' terminus relative to 3' stem of A-loop (n=3)

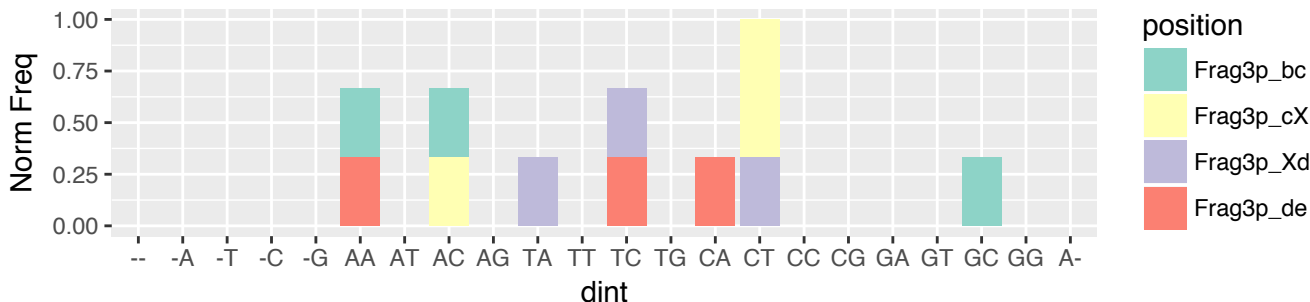

HNSC (n=1291)  
 5'-tRF & exclusive (n=174)  
 3' terminus relative to 3' stem of A-loop (n=3)

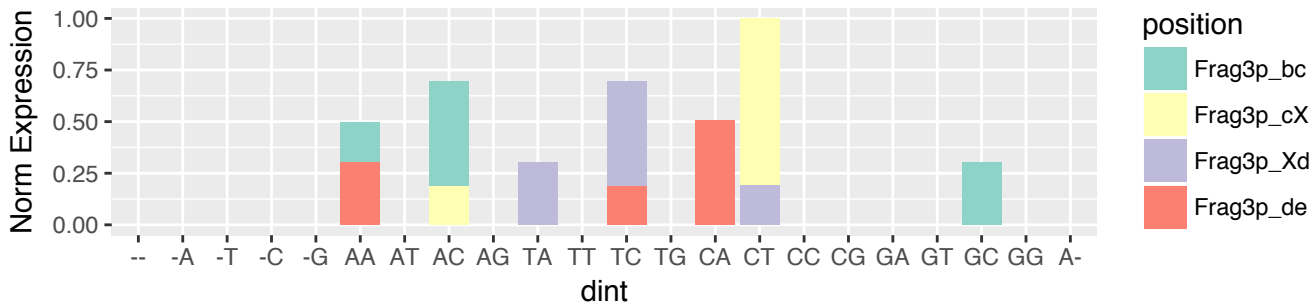

HNSC (n=1291)  
i-tRF & exclusive (n=294)  
5' terminus relative to 5' end of the tRNA (n=14)

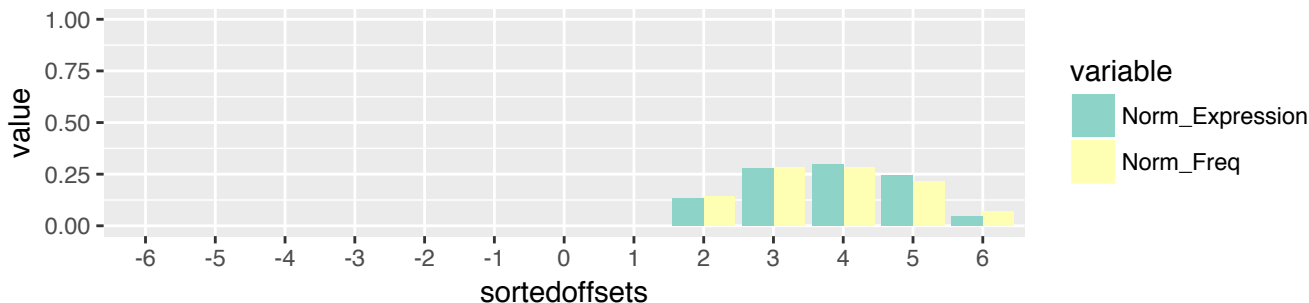

HNSC (n=1291)  
i-tRF & exclusive (n=294)  
5' terminus relative to 5' end of the tRNA (n=14)

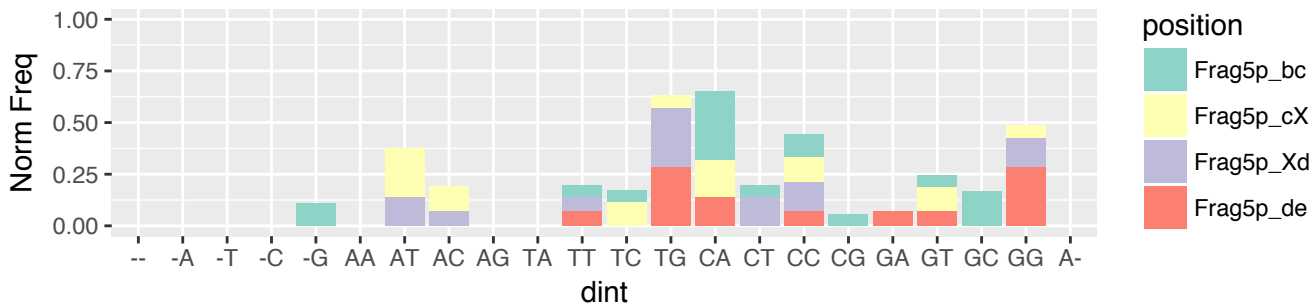

HNSC (n=1291)  
i-tRF & exclusive (n=294)  
5' terminus relative to 5' end of the tRNA (n=14)

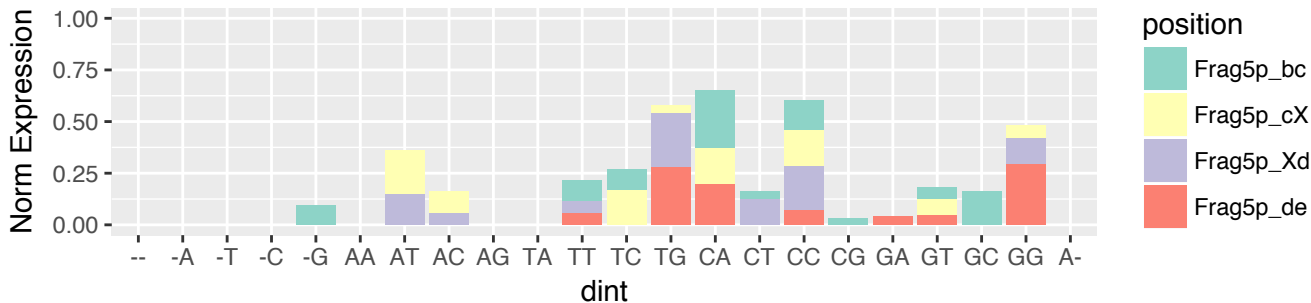

HNSC (n=1291)  
 i-tRF & exclusive (n=294)  
 5' terminus relative to 5' stem of D-loop (n=101)

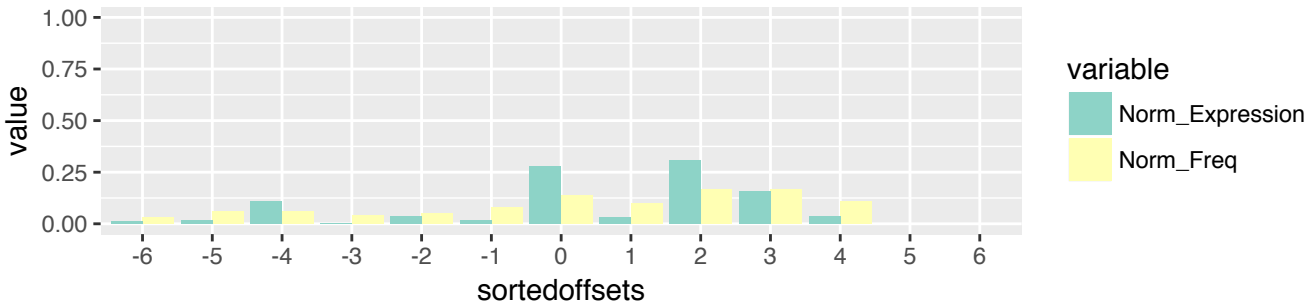

HNSC (n=1291)  
 i-tRF & exclusive (n=294)  
 5' terminus relative to 5' stem of D-loop (n=101)

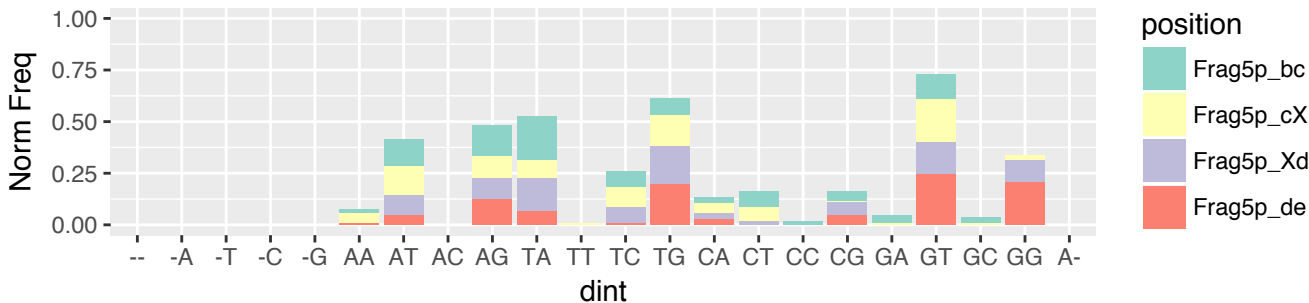

HNSC (n=1291)  
 i-tRF & exclusive (n=294)  
 5' terminus relative to 5' stem of D-loop (n=101)

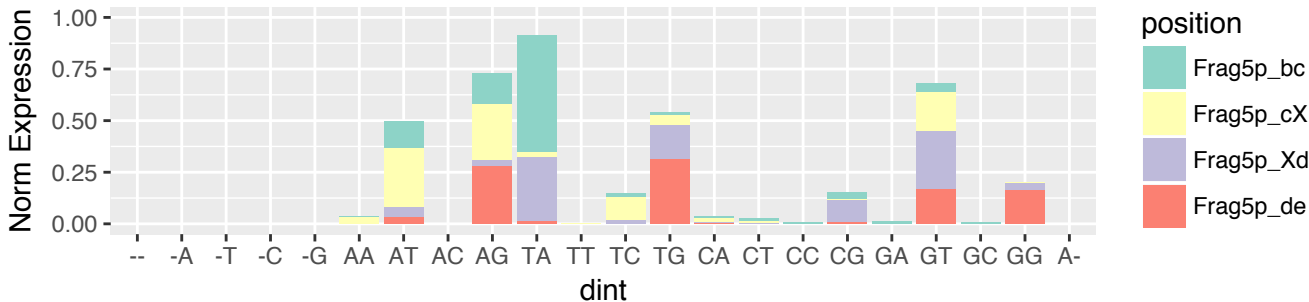

HNSC (n=1291)  
 i-tRF & exclusive (n=294)  
 5' terminus relative to 3' stem of D-loop (n=6)

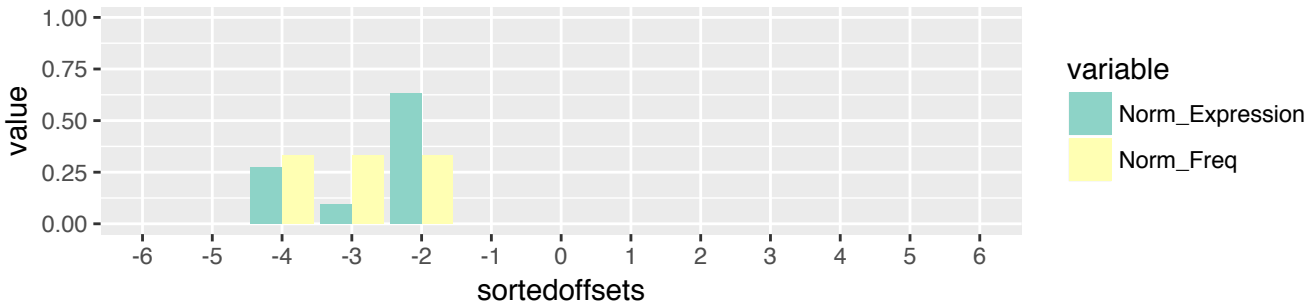

HNSC (n=1291)  
 i-tRF & exclusive (n=294)  
 5' terminus relative to 3' stem of D-loop (n=6)

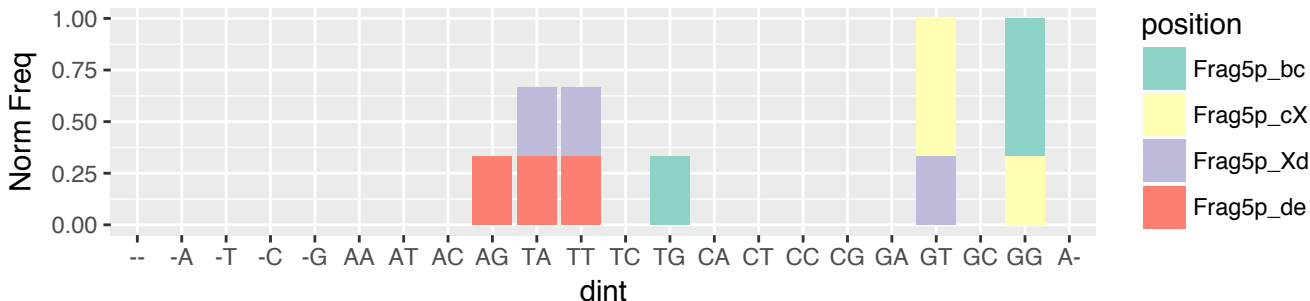

HNSC (n=1291)  
 i-tRF & exclusive (n=294)  
 5' terminus relative to 3' stem of D-loop (n=6)

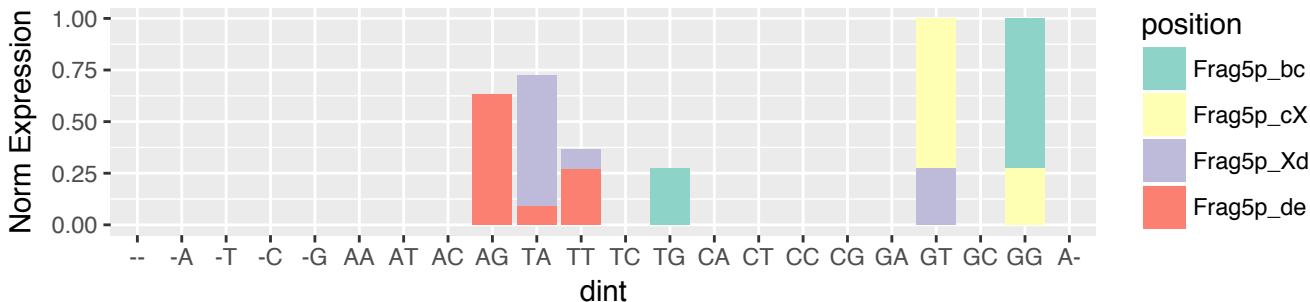



HNSC (n=1291)  
 i-tRF & exclusive (n=294)  
 5' terminus relative to 5' stem of A-loop (n=70)

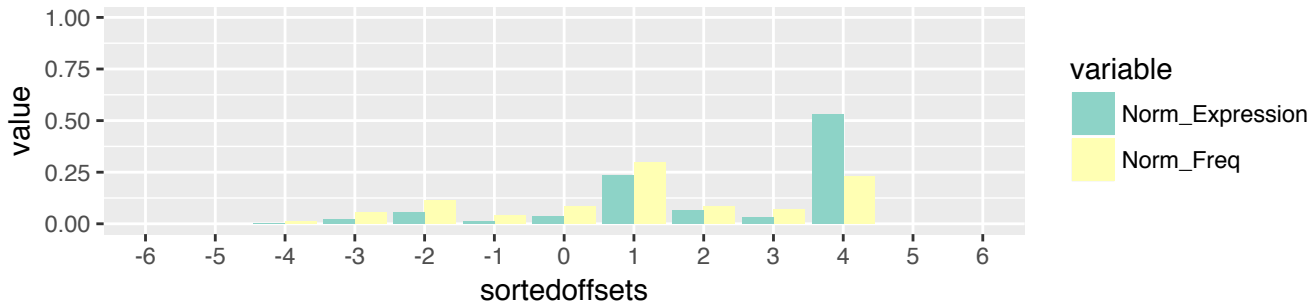

HNSC (n=1291)  
 i-tRF & exclusive (n=294)  
 5' terminus relative to 5' stem of A-loop (n=70)

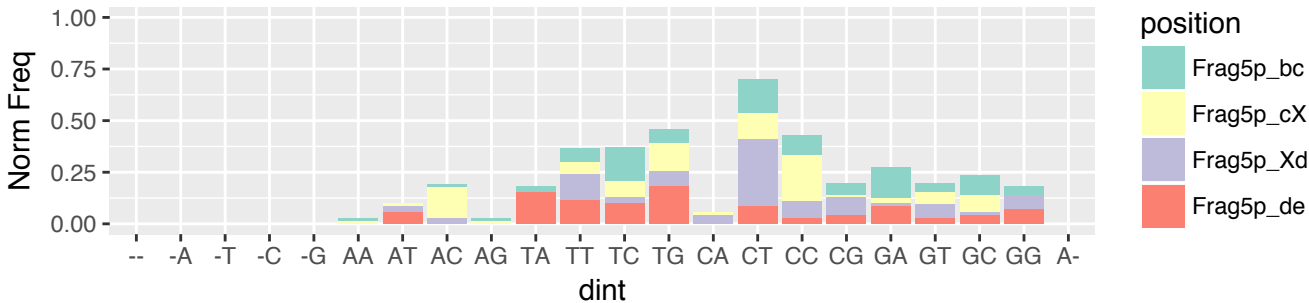

HNSC (n=1291)  
 i-tRF & exclusive (n=294)  
 5' terminus relative to 5' stem of A-loop (n=70)

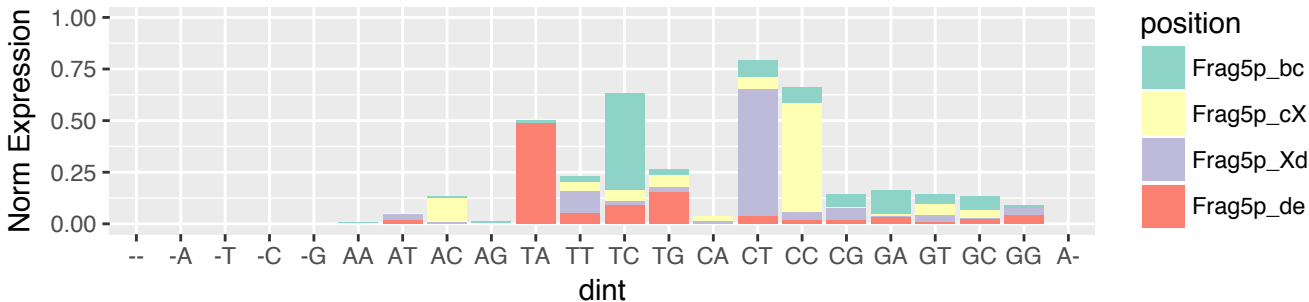

HNSC (n=1291)  
 i-tRF & exclusive (n=294)  
 5' terminus relative to 3' stem of A-loop (n=69)

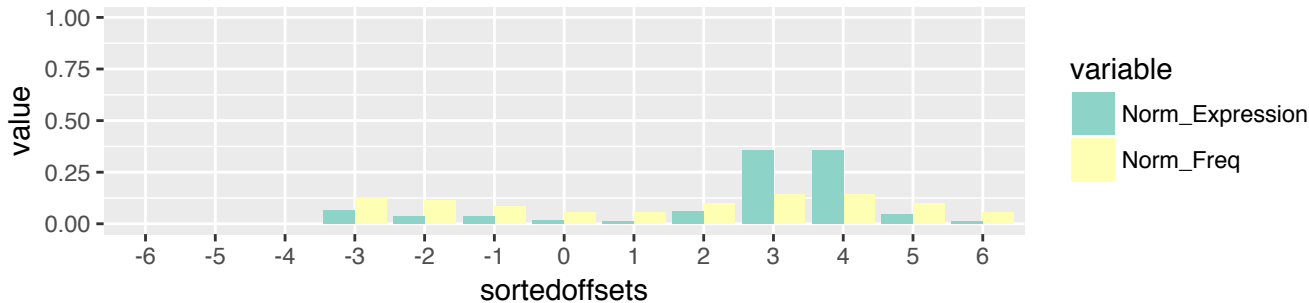

HNSC (n=1291)  
 i-tRF & exclusive (n=294)  
 5' terminus relative to 3' stem of A-loop (n=69)

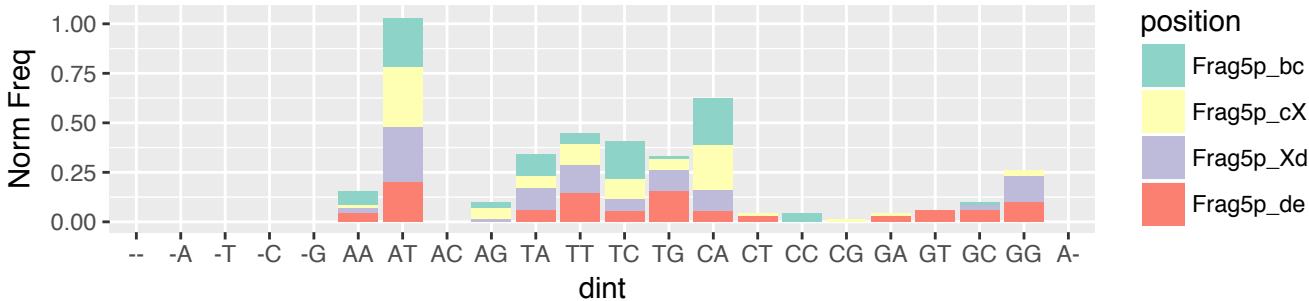

HNSC (n=1291)  
 i-tRF & exclusive (n=294)  
 5' terminus relative to 3' stem of A-loop (n=69)

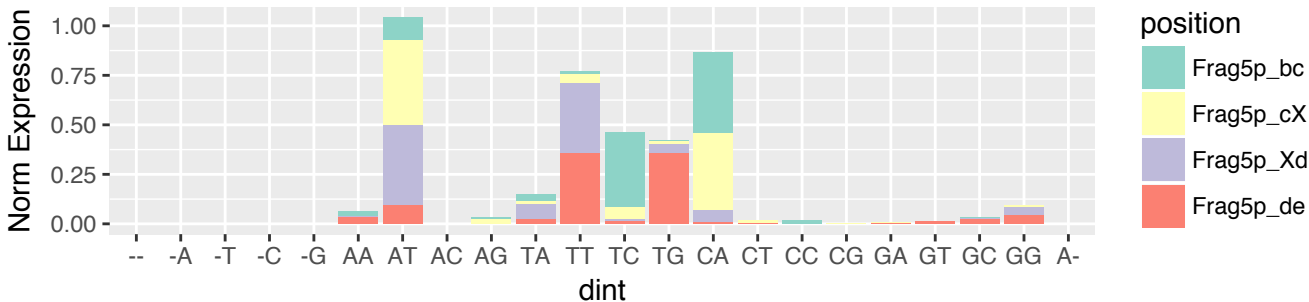

HNSC (n=1291)  
i-tRF & exclusive (n=294)  
5' terminus relative to 5' stem of T-loop (n=34)

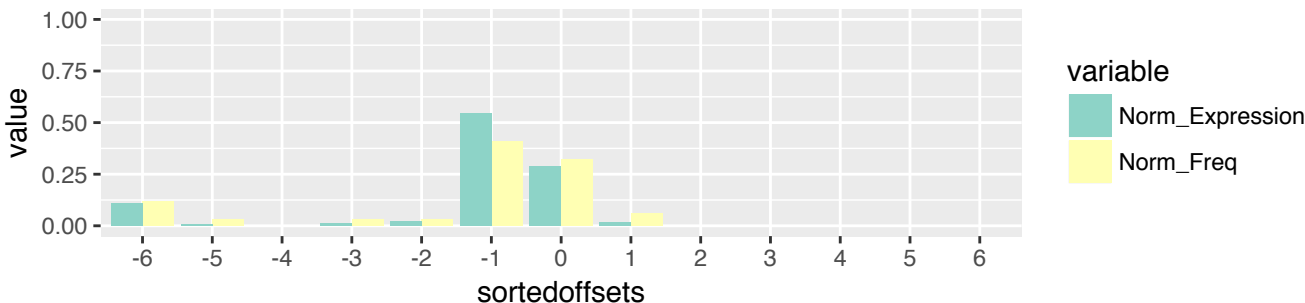

HNSC (n=1291)  
i-tRF & exclusive (n=294)  
5' terminus relative to 5' stem of T-loop (n=34)

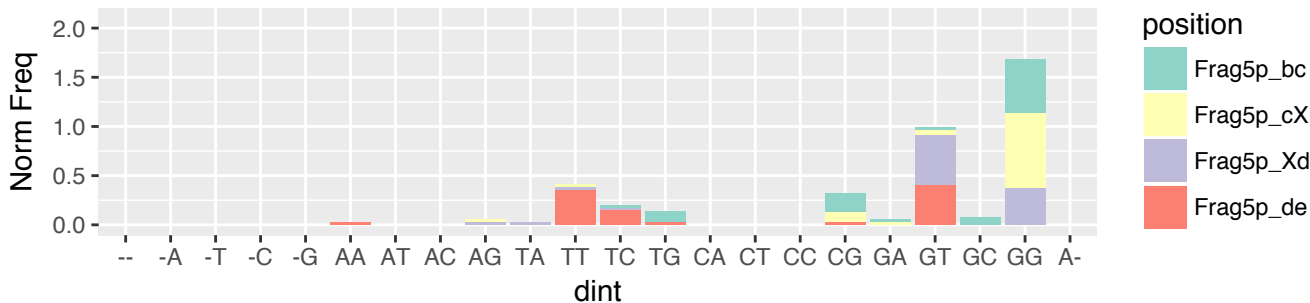

HNSC (n=1291)  
i-tRF & exclusive (n=294)  
5' terminus relative to 5' stem of T-loop (n=34)

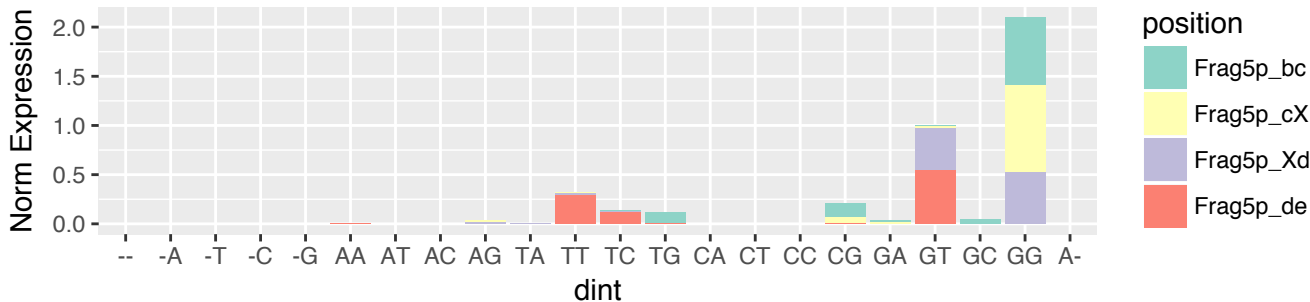

HNSC (n=1291)  
 i-tRF & exclusive (n=294)  
 3' terminus relative to 3' stem of D-loop (n=2)

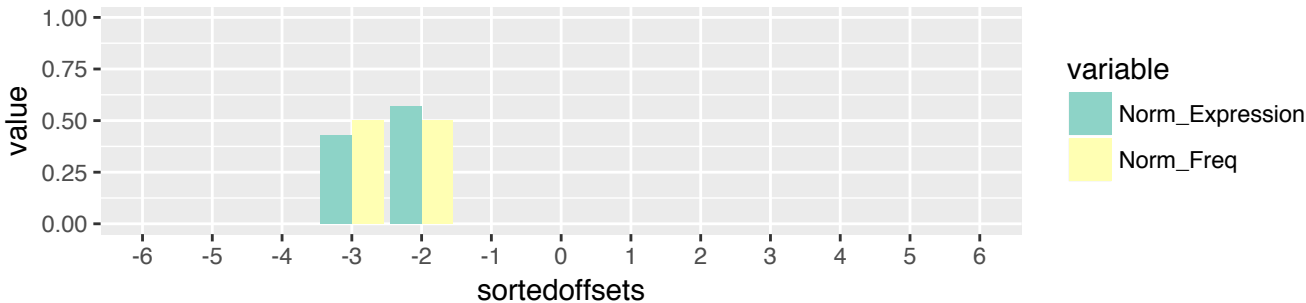

HNSC (n=1291)  
 i-tRF & exclusive (n=294)  
 3' terminus relative to 3' stem of D-loop (n=2)

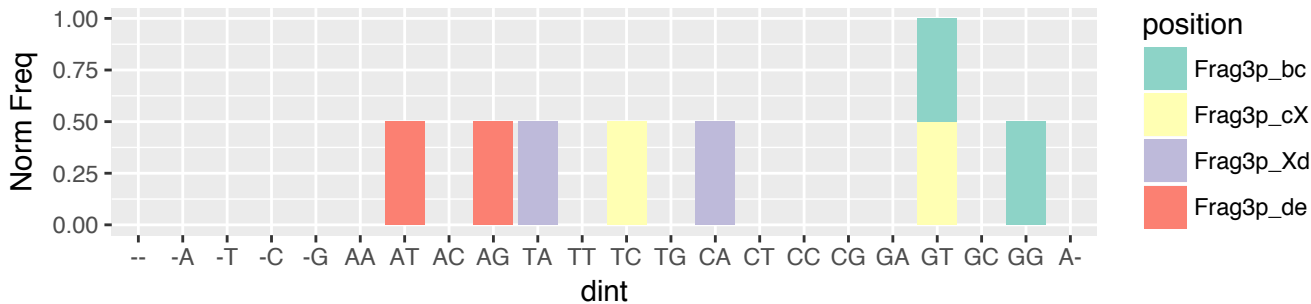

HNSC (n=1291)  
 i-tRF & exclusive (n=294)  
 3' terminus relative to 3' stem of D-loop (n=2)

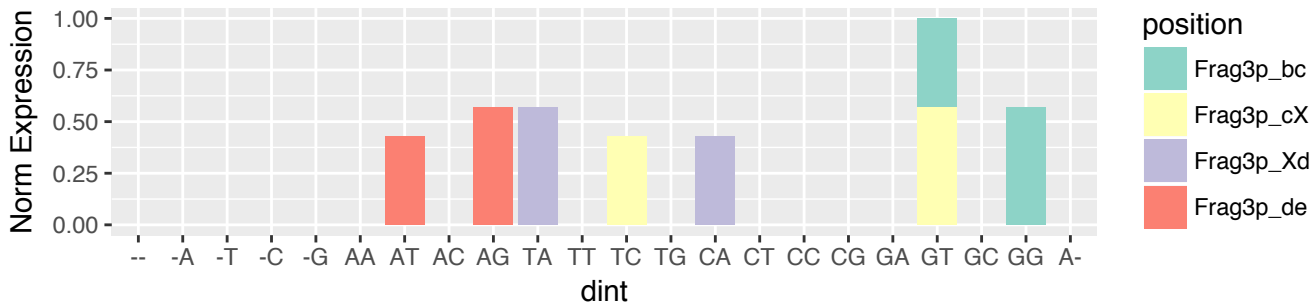

HNSC (n=1291)  
 i-tRF & exclusive (n=294)  
 3' terminus relative to 5' stem of A-loop (n=97)

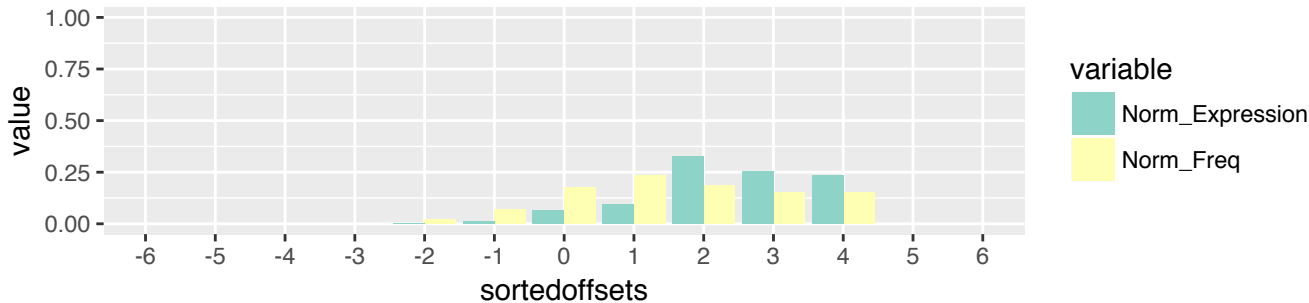

HNSC (n=1291)  
 i-tRF & exclusive (n=294)  
 3' terminus relative to 5' stem of A-loop (n=97)

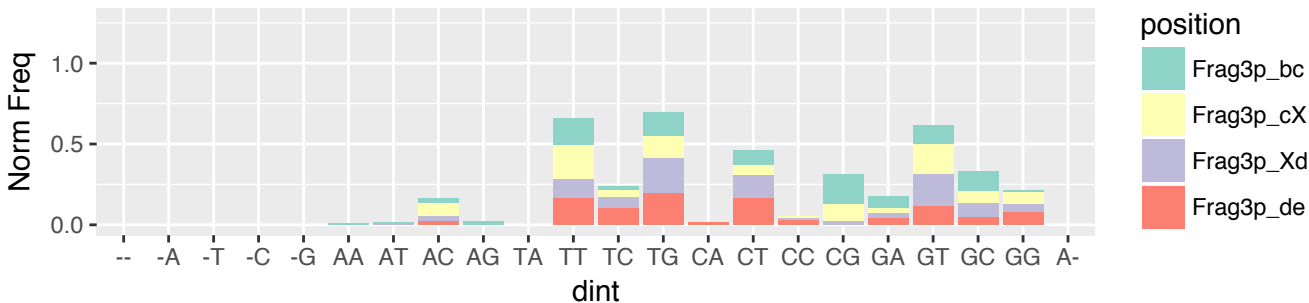

HNSC (n=1291)  
 i-tRF & exclusive (n=294)  
 3' terminus relative to 5' stem of A-loop (n=97)

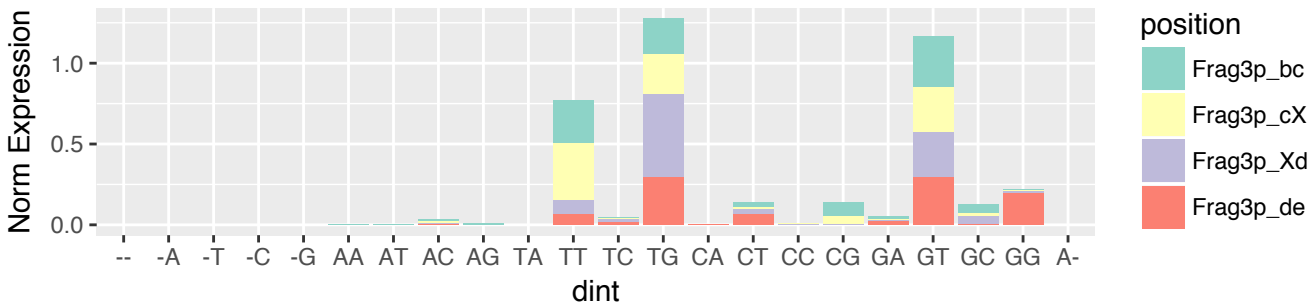

HNSC (n=1291)  
i-tRF & exclusive (n=294)  
3' terminus relative to 3' stem of A-loop (n=29)

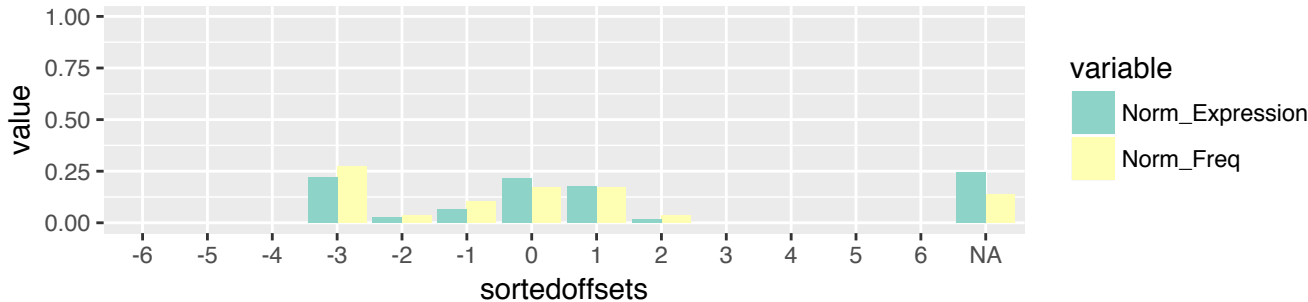

HNSC (n=1291)  
i-tRF & exclusive (n=294)  
3' terminus relative to 3' stem of A-loop (n=29)

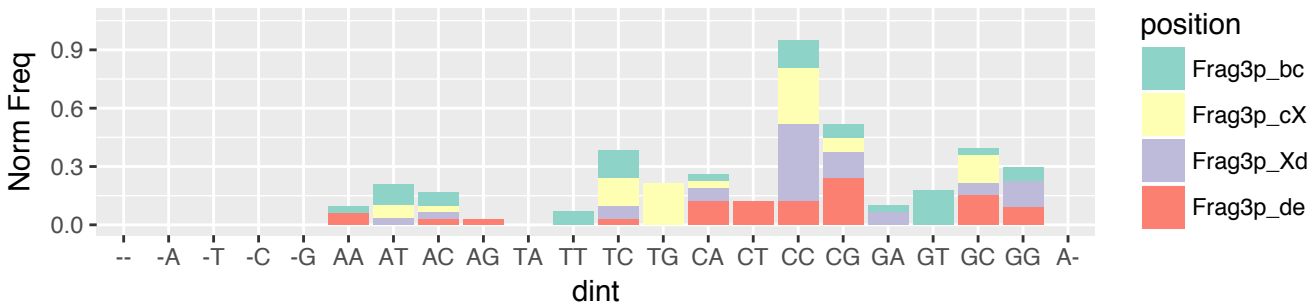

HNSC (n=1291)  
i-tRF & exclusive (n=294)  
3' terminus relative to 3' stem of A-loop (n=29)

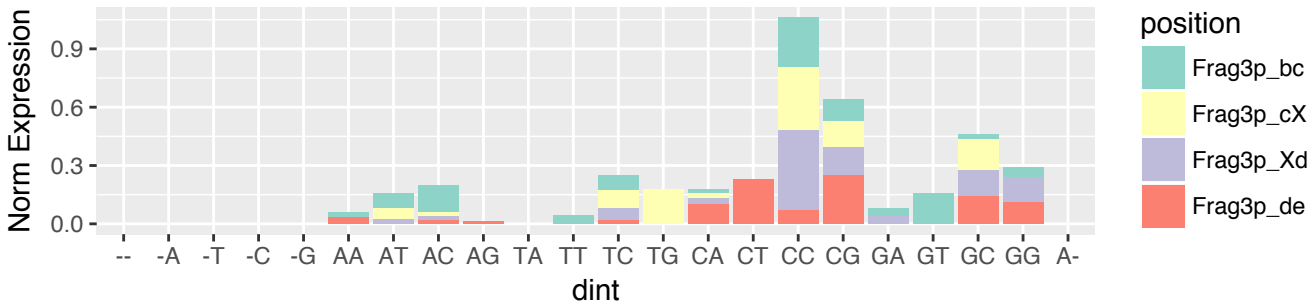

HNSC (n=1291)  
 i-tRF & exclusive (n=294)  
 3' terminus relative to 5' stem of T-loop (n=75)

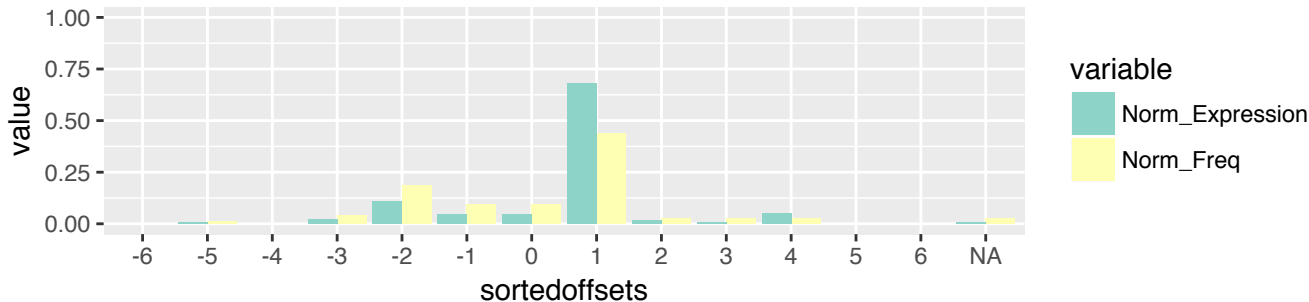

HNSC (n=1291)  
 i-tRF & exclusive (n=294)  
 3' terminus relative to 5' stem of T-loop (n=75)

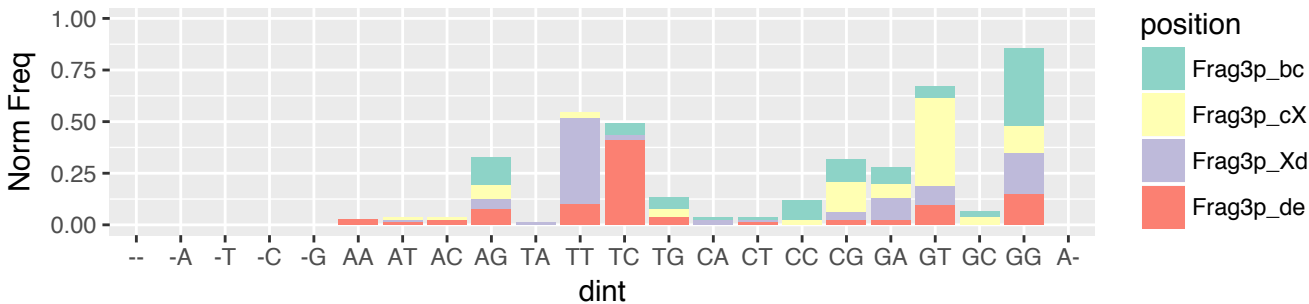

HNSC (n=1291)  
 i-tRF & exclusive (n=294)  
 3' terminus relative to 5' stem of T-loop (n=75)

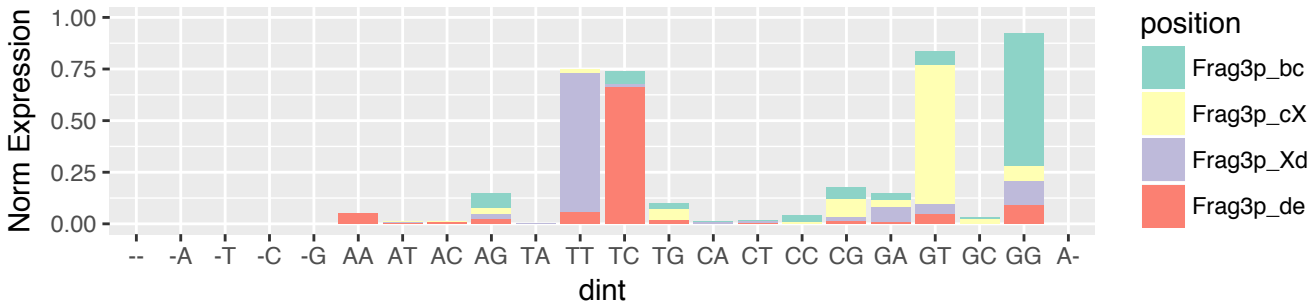

HNSC (n=1291)  
i-tRF & exclusive (n=294)  
3' terminus relative to 3' stem of T-loop (n=51)

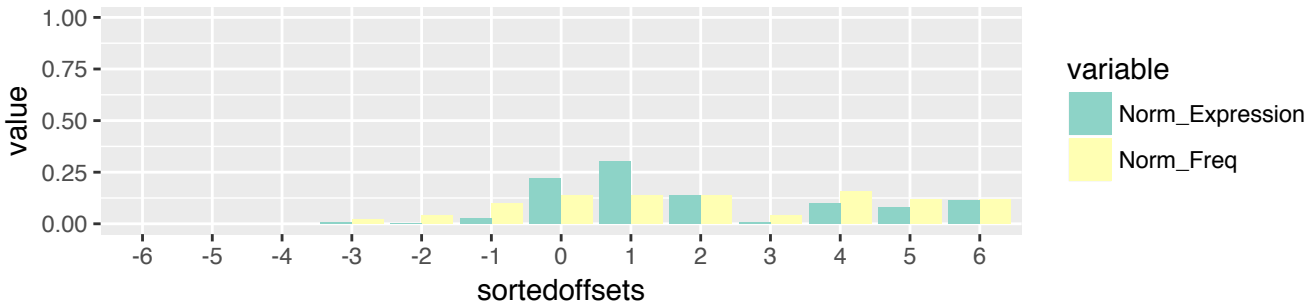

HNSC (n=1291)  
i-tRF & exclusive (n=294)  
3' terminus relative to 3' stem of T-loop (n=51)

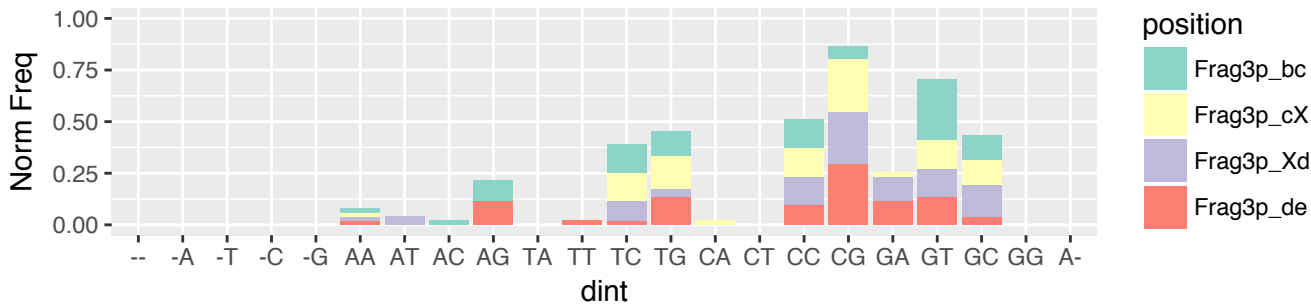

HNSC (n=1291)  
i-tRF & exclusive (n=294)  
3' terminus relative to 3' stem of T-loop (n=51)

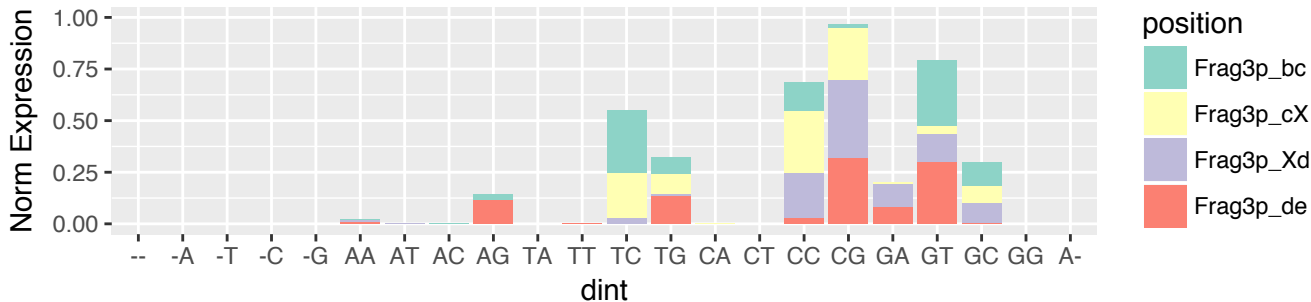



HNSC (n=1291)  
i-tRF & exclusive (n=294)  
3' terminus relative to 3' end of the tRNA (n=41)

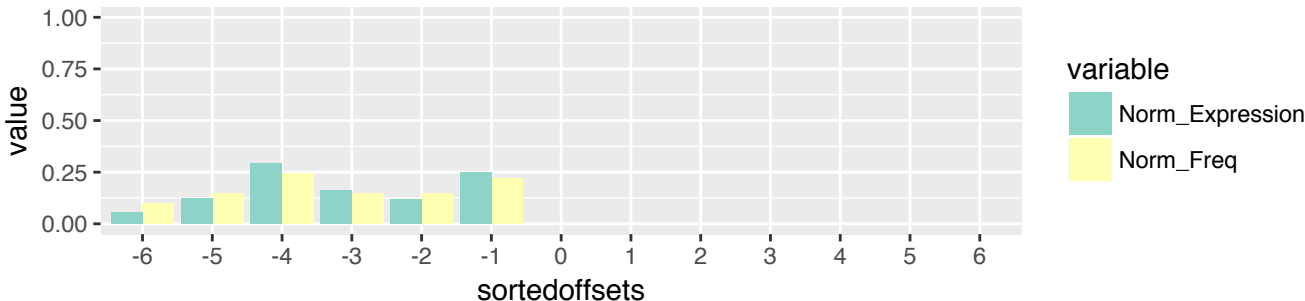

HNSC (n=1291)  
i-tRF & exclusive (n=294)  
3' terminus relative to 3' end of the tRNA (n=41)

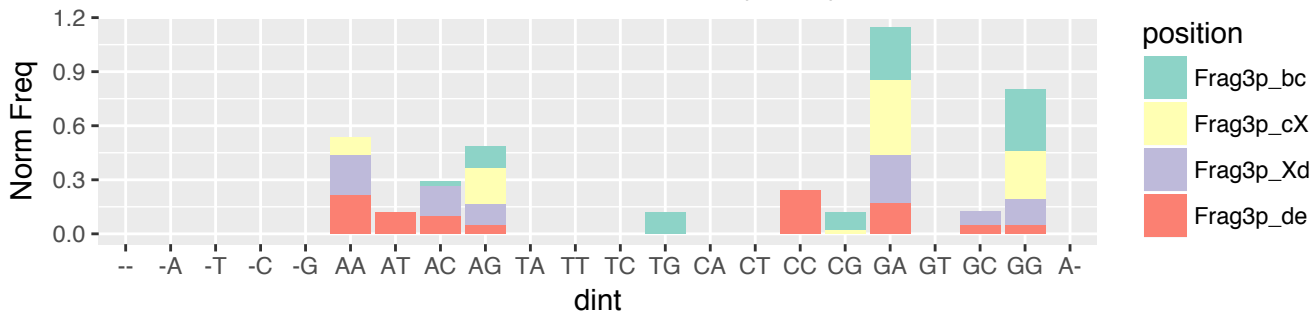

HNSC (n=1291)  
i-tRF & exclusive (n=294)  
3' terminus relative to 3' end of the tRNA (n=41)

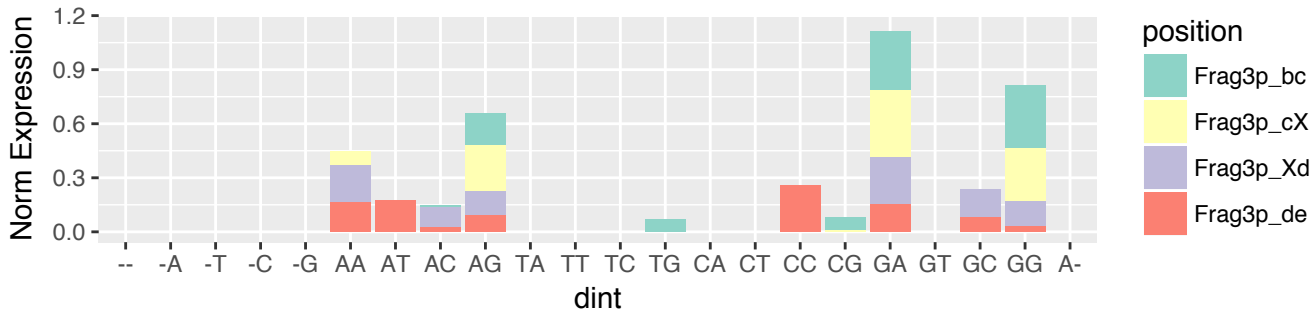

HNSC (n=1291)  
 3'-tRF & exclusive (n=215)  
 5' terminus relative to 5' stem of T-loop (n=132)

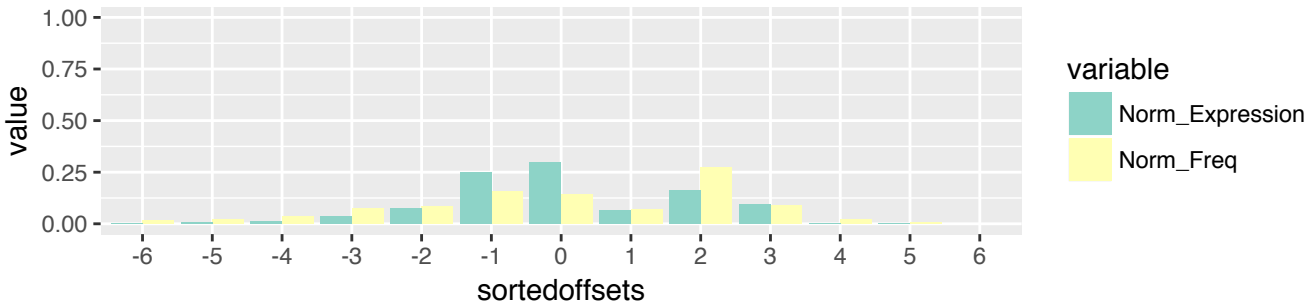

HNSC (n=1291)  
 3'-tRF & exclusive (n=215)  
 5' terminus relative to 5' stem of T-loop (n=132)

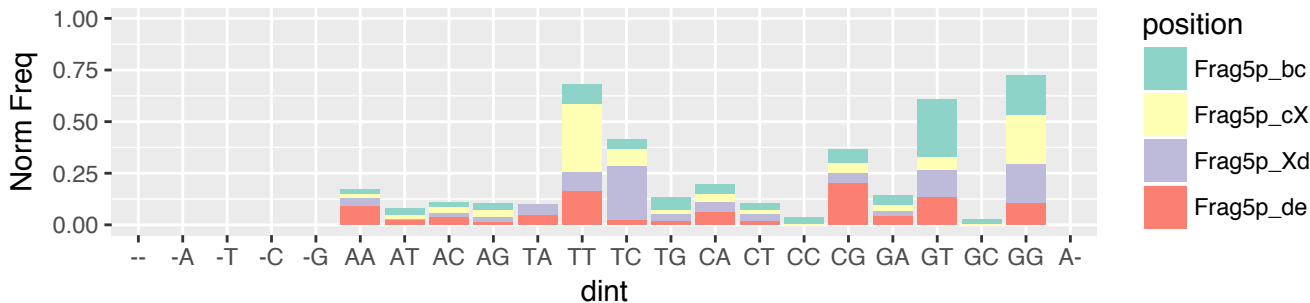

HNSC (n=1291)  
 3'-tRF & exclusive (n=215)  
 5' terminus relative to 5' stem of T-loop (n=132)

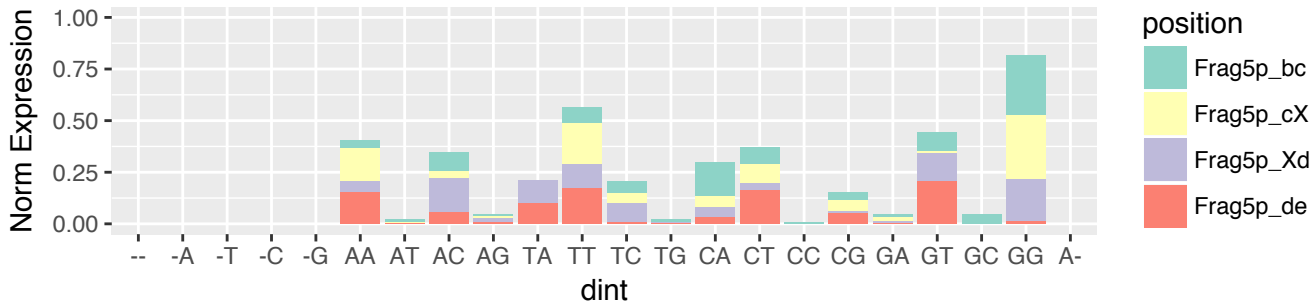

HNSC (n=1291)  
 3'-tRF & exclusive (n=215)  
 5' terminus relative to 3' stem of T-loop (n=83)

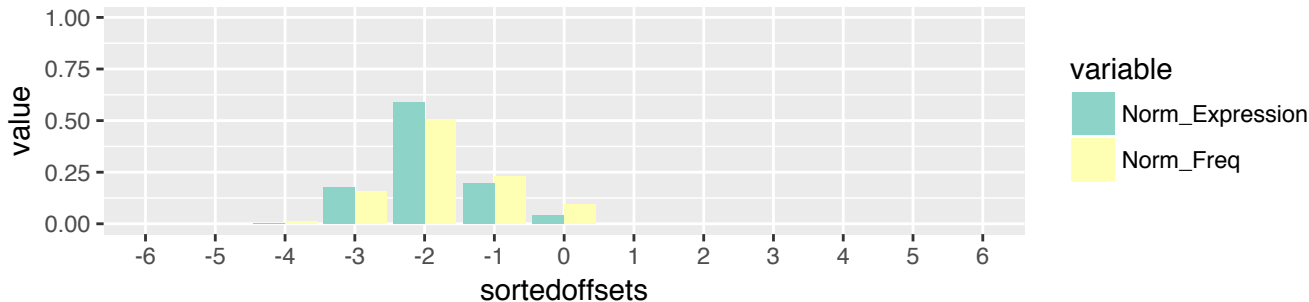

HNSC (n=1291)  
 3'-tRF & exclusive (n=215)  
 5' terminus relative to 3' stem of T-loop (n=83)

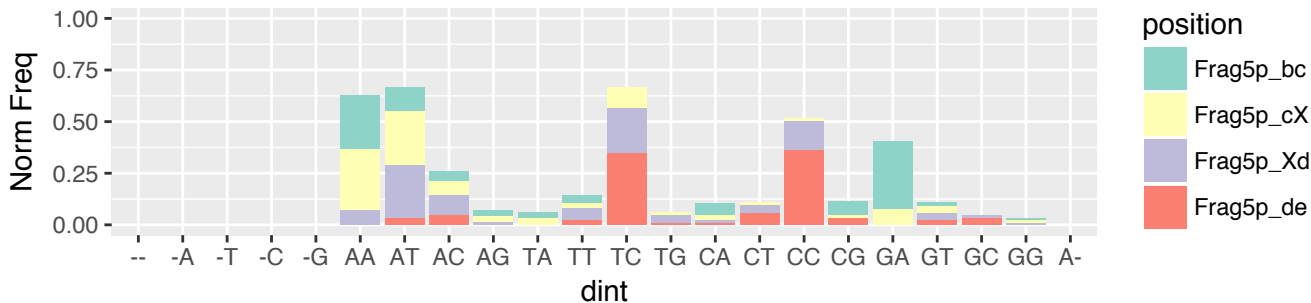

HNSC (n=1291)  
 3'-tRF & exclusive (n=215)  
 5' terminus relative to 3' stem of T-loop (n=83)

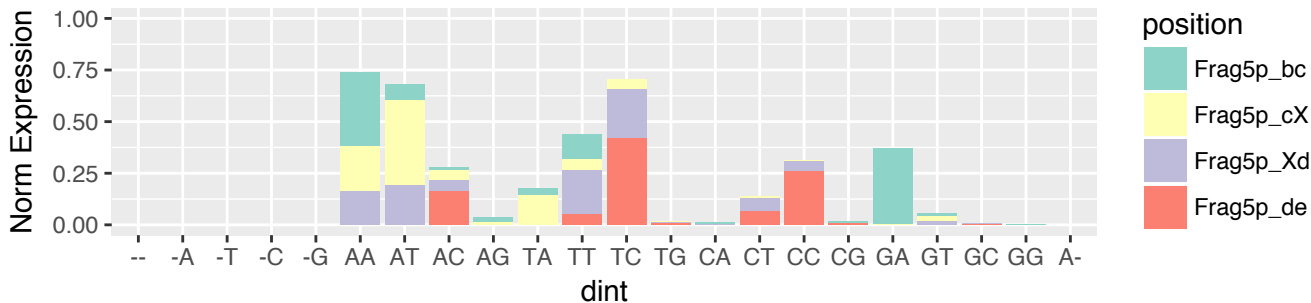

HNSC (n=1291)  
 3'-tRF & exclusive (n=215)  
 3' terminus relative to 3' end of the tRNA (n=215)

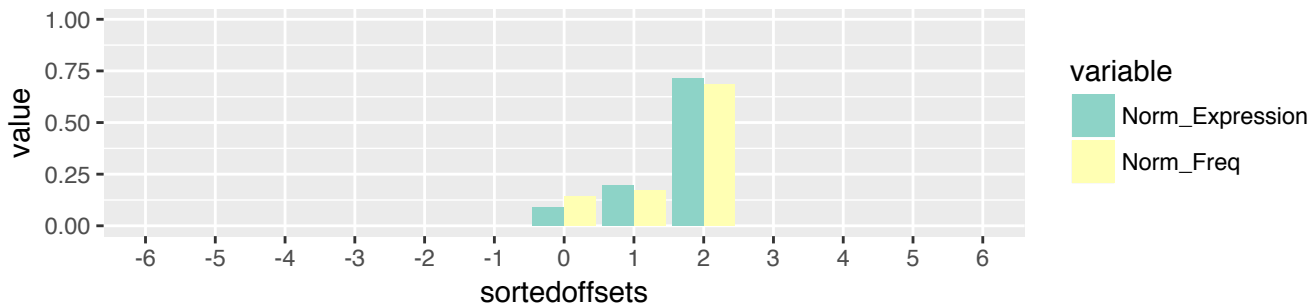

HNSC (n=1291)  
 3'-tRF & exclusive (n=215)  
 3' terminus relative to 3' end of the tRNA (n=215)

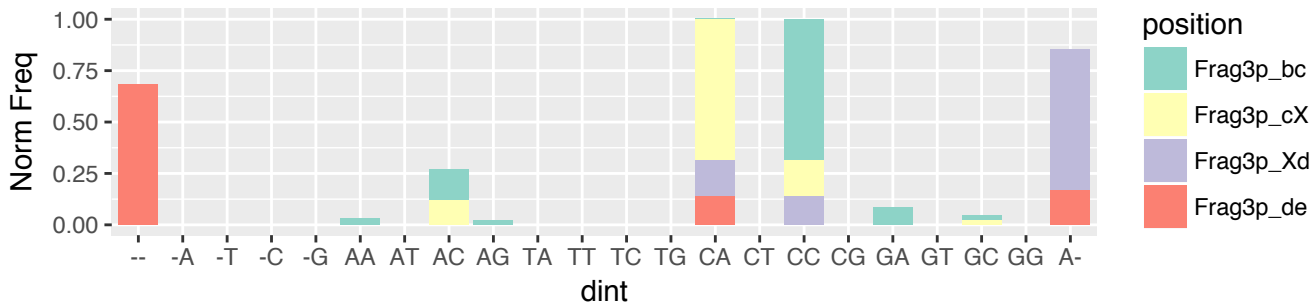

HNSC (n=1291)  
 3'-tRF & exclusive (n=215)  
 3' terminus relative to 3' end of the tRNA (n=215)

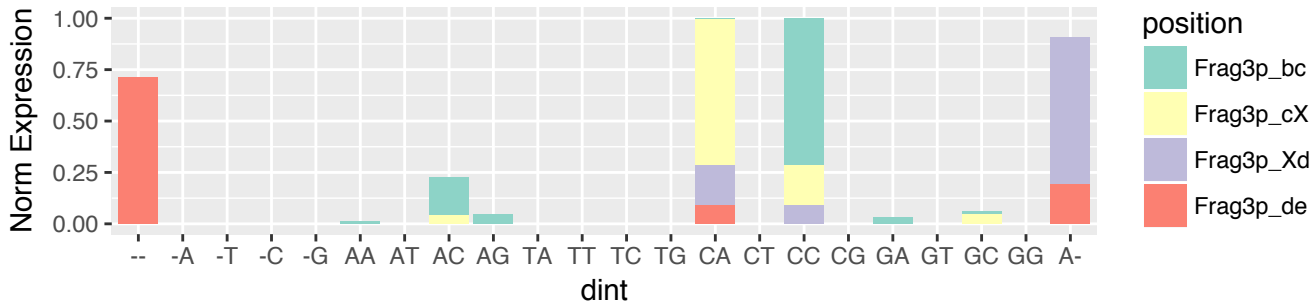

KICH (n=1003)  
5'-half & exclusive (n=5)  
5' terminus relative to 5' end of the tRNA (n=5)



KICH (n=1003)  
5'-half & exclusive (n=5)  
5' terminus relative to 5' end of the tRNA (n=5)



KICH (n=1003)  
5'-half & exclusive (n=5)  
5' terminus relative to 5' end of the tRNA (n=5)

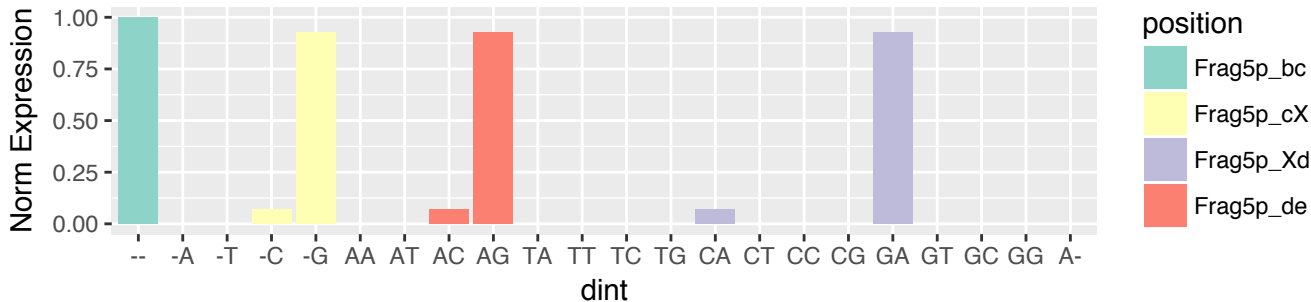

KICH (n=1003)  
 5'-half & exclusive (n=5)  
 3' terminus relative to 5' stem of A-loop (n=5)

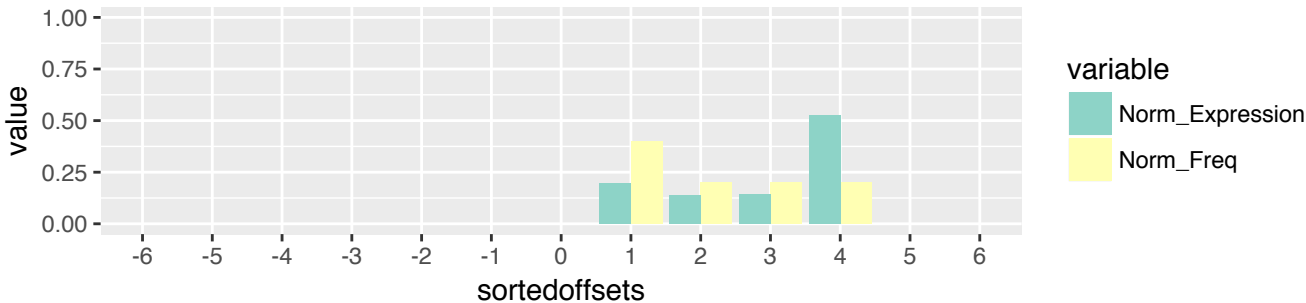

KICH (n=1003)  
 5'-half & exclusive (n=5)  
 3' terminus relative to 5' stem of A-loop (n=5)



KICH (n=1003)  
 5'-half & exclusive (n=5)  
 3' terminus relative to 5' stem of A-loop (n=5)

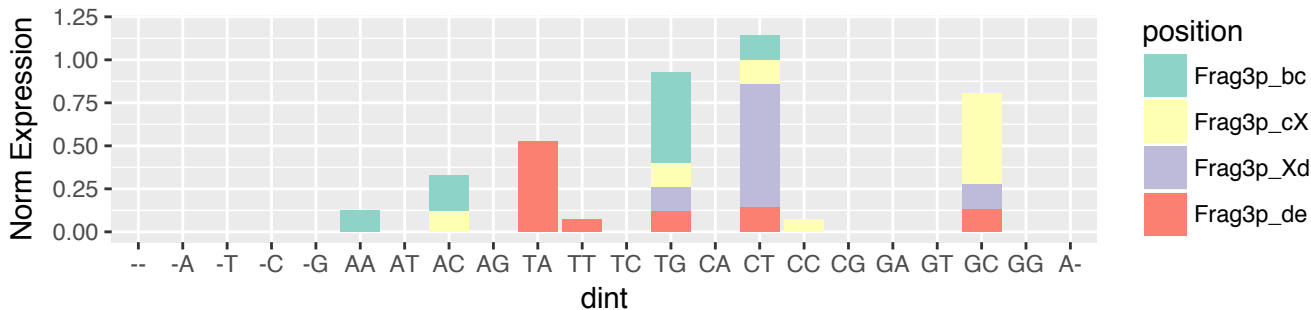

KICH (n=1003)  
 5'-tRF & exclusive (n=137)  
 5' terminus relative to 5' end of the tRNA (n=137)

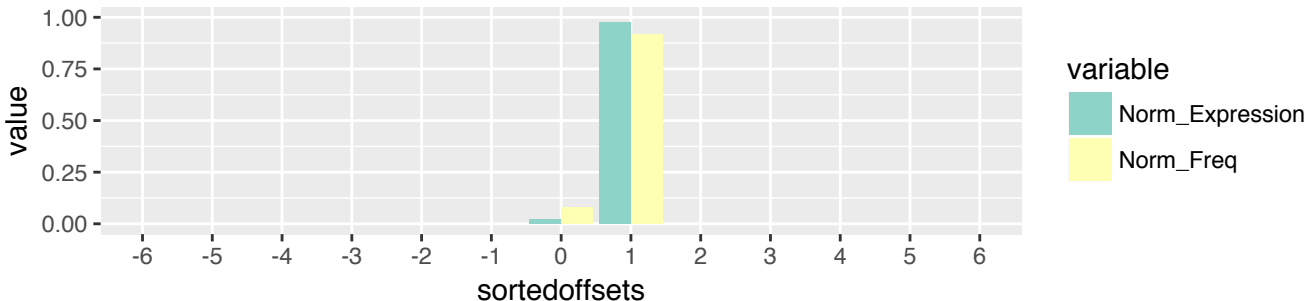

KICH (n=1003)  
 5'-tRF & exclusive (n=137)  
 5' terminus relative to 5' end of the tRNA (n=137)

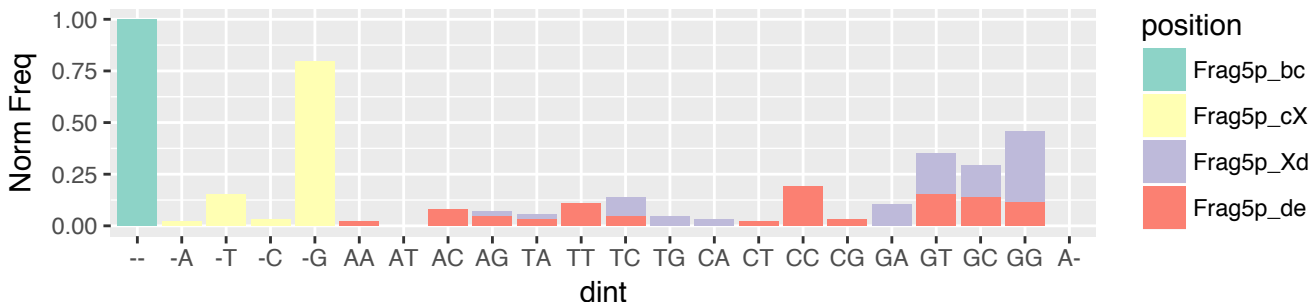

KICH (n=1003)  
 5'-tRF & exclusive (n=137)  
 5' terminus relative to 5' end of the tRNA (n=137)

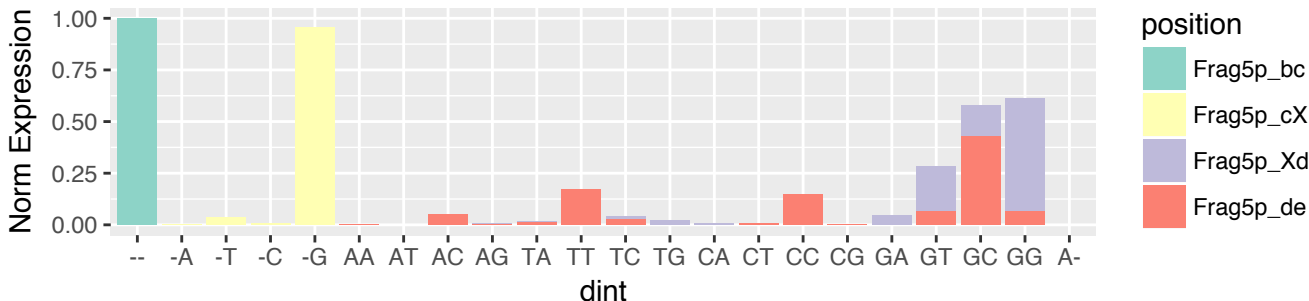

KICH (n=1003)  
5'-tRF & exclusive (n=137)  
3' terminus relative to 5' stem of D-loop (n=10)

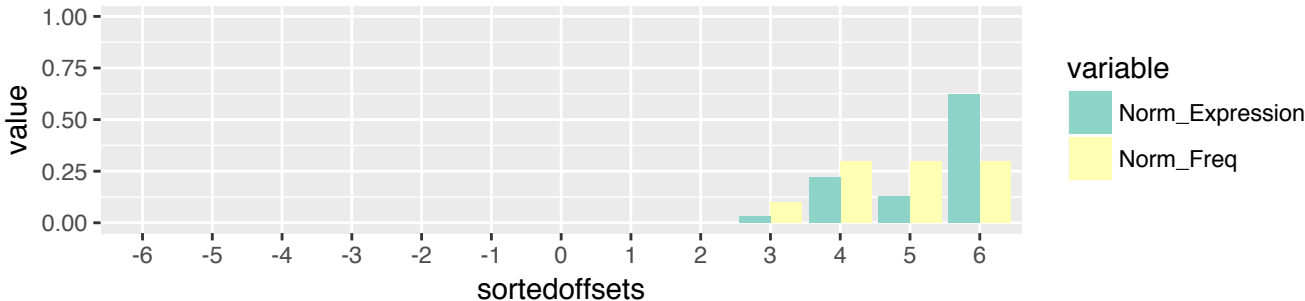

KICH (n=1003)  
5'-tRF & exclusive (n=137)  
3' terminus relative to 5' stem of D-loop (n=10)

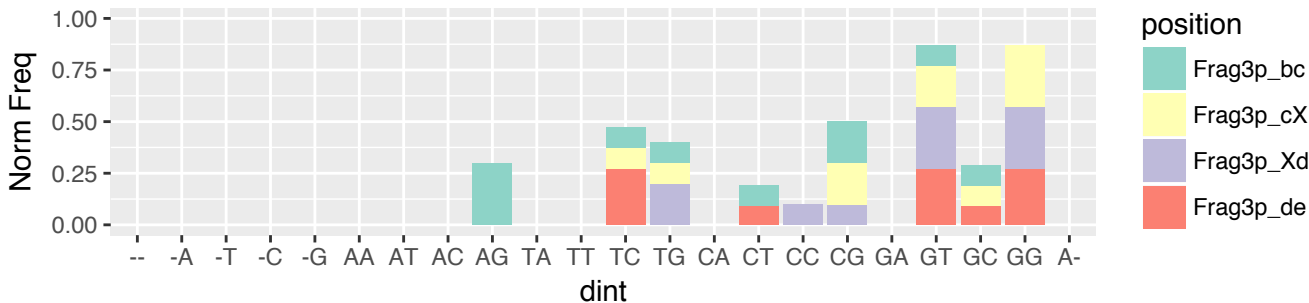

KICH (n=1003)  
5'-tRF & exclusive (n=137)  
3' terminus relative to 5' stem of D-loop (n=10)

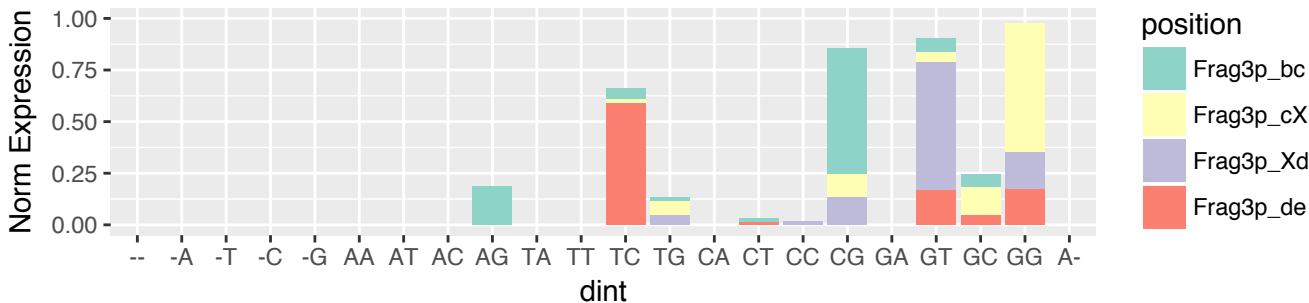



KICH (n=1003)  
 5'-tRF & exclusive (n=137)  
 3' terminus relative to 3' stem of D-loop (n=121)

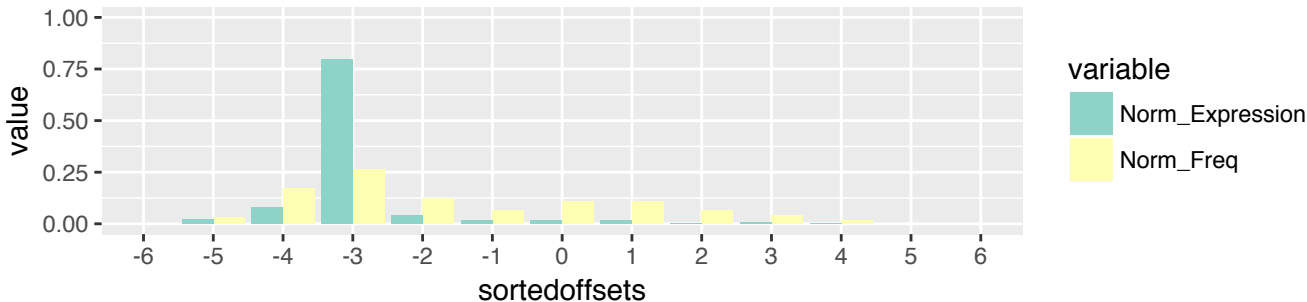

KICH (n=1003)  
 5'-tRF & exclusive (n=137)  
 3' terminus relative to 3' stem of D-loop (n=121)

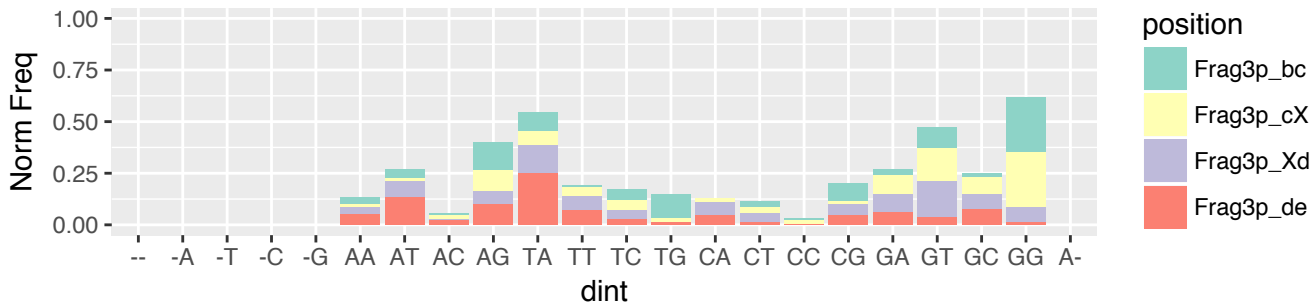

KICH (n=1003)  
 5'-tRF & exclusive (n=137)  
 3' terminus relative to 3' stem of D-loop (n=121)

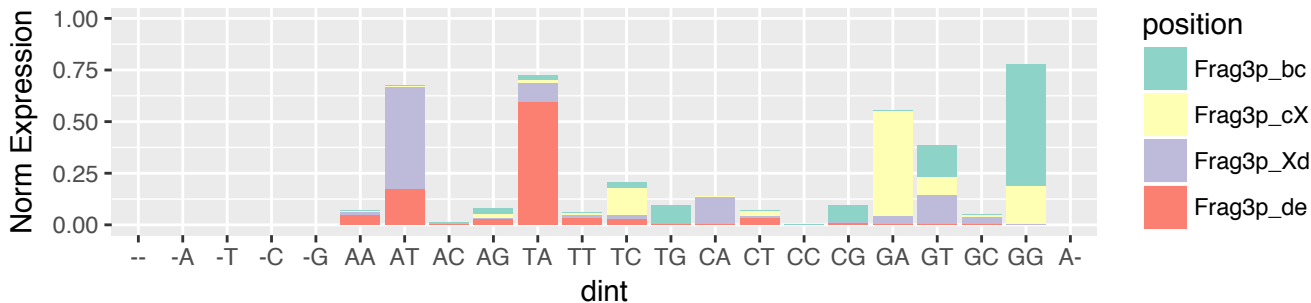

KICH (n=1003)  
 5'-tRF & exclusive (n=137)  
 3' terminus relative to 5' stem of A-loop (n=2)

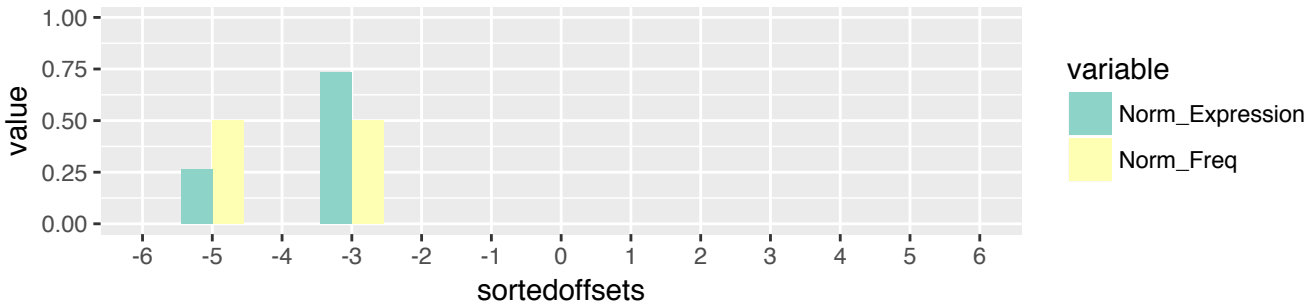

KICH (n=1003)  
 5'-tRF & exclusive (n=137)  
 3' terminus relative to 5' stem of A-loop (n=2)

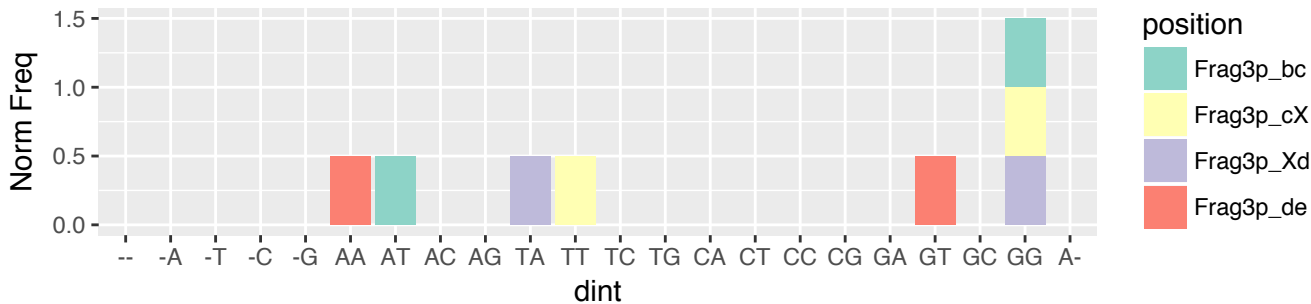

KICH (n=1003)  
 5'-tRF & exclusive (n=137)  
 3' terminus relative to 5' stem of A-loop (n=2)

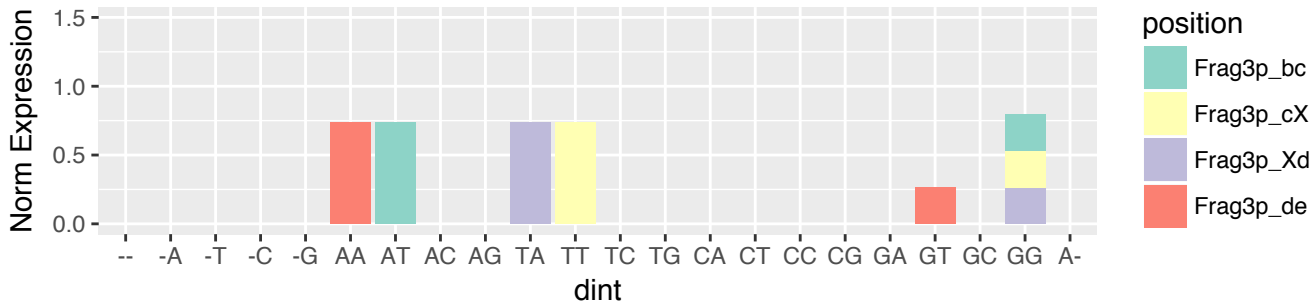

KICH (n=1003)  
 5'-tRF & exclusive (n=137)  
 3' terminus relative to 3' stem of A-loop (n=4)

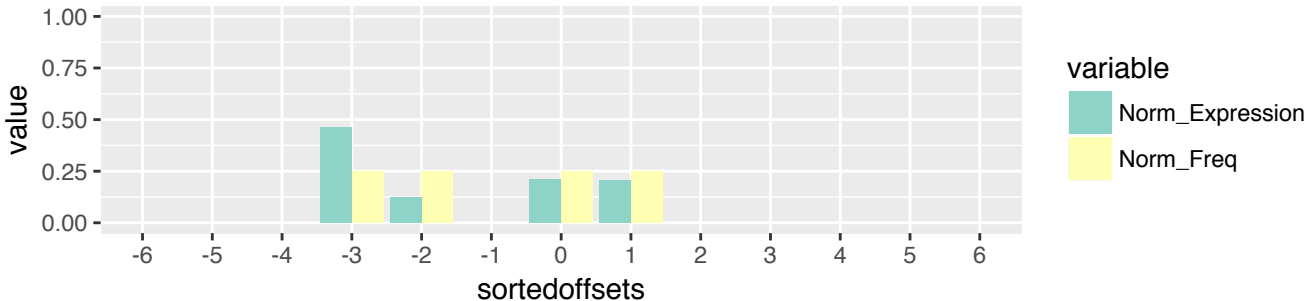

KICH (n=1003)  
 5'-tRF & exclusive (n=137)  
 3' terminus relative to 3' stem of A-loop (n=4)

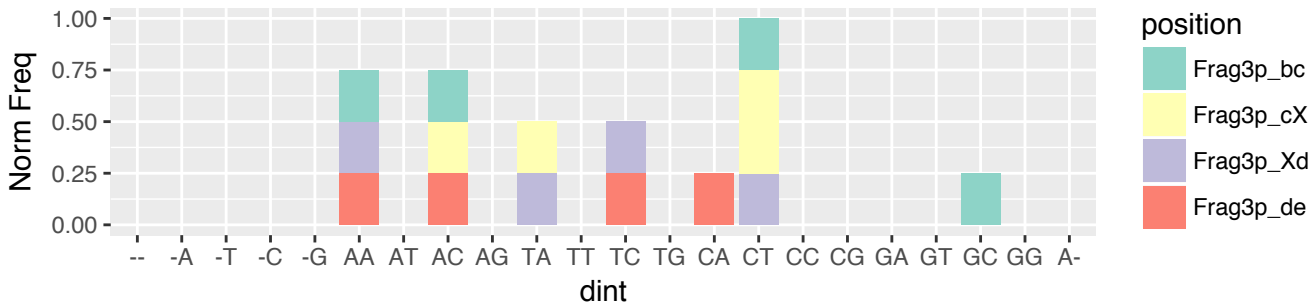

KICH (n=1003)  
 5'-tRF & exclusive (n=137)  
 3' terminus relative to 3' stem of A-loop (n=4)

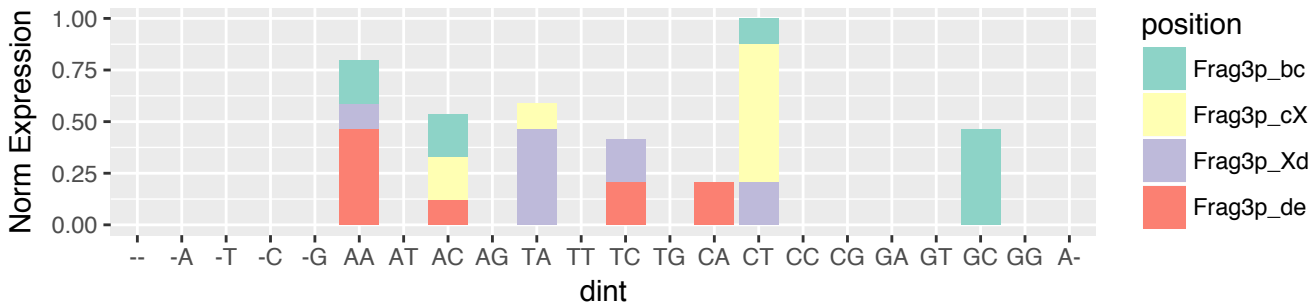

KICH (n=1003)  
 i-tRF & exclusive (n=197)  
 5' terminus relative to 5' end of the tRNA (n=8)

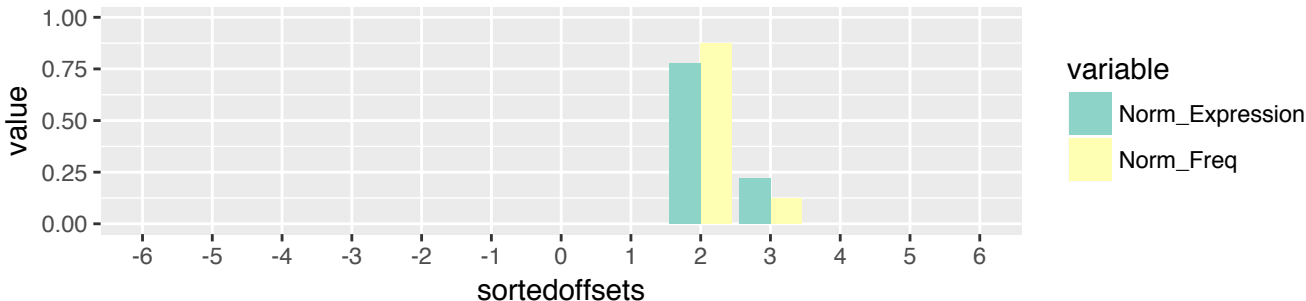

KICH (n=1003)  
 i-tRF & exclusive (n=197)  
 5' terminus relative to 5' end of the tRNA (n=8)

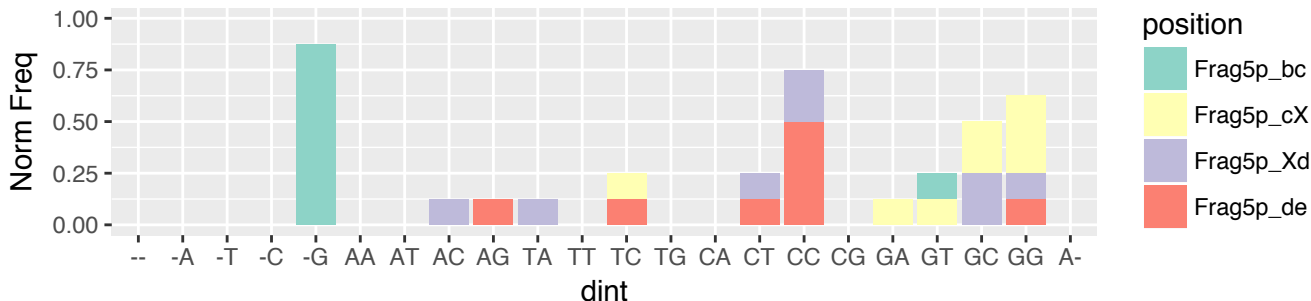

KICH (n=1003)  
 i-tRF & exclusive (n=197)  
 5' terminus relative to 5' end of the tRNA (n=8)

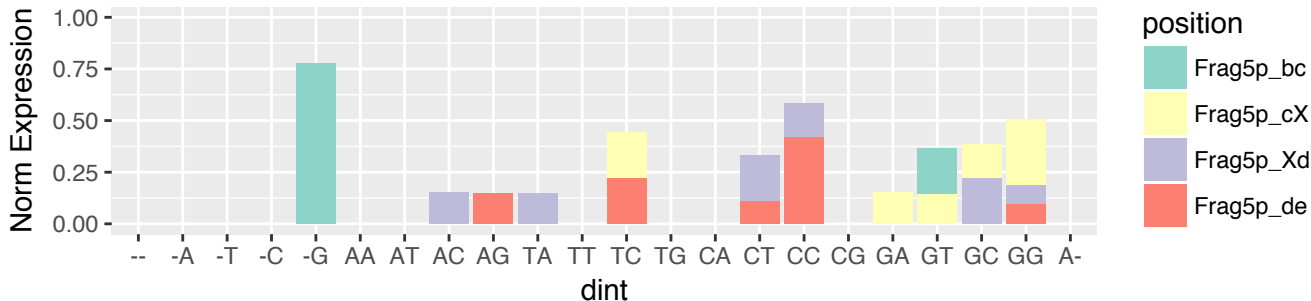

KICH (n=1003)  
i-tRF & exclusive (n=197)  
5' terminus relative to 5' stem of D-loop (n=53)

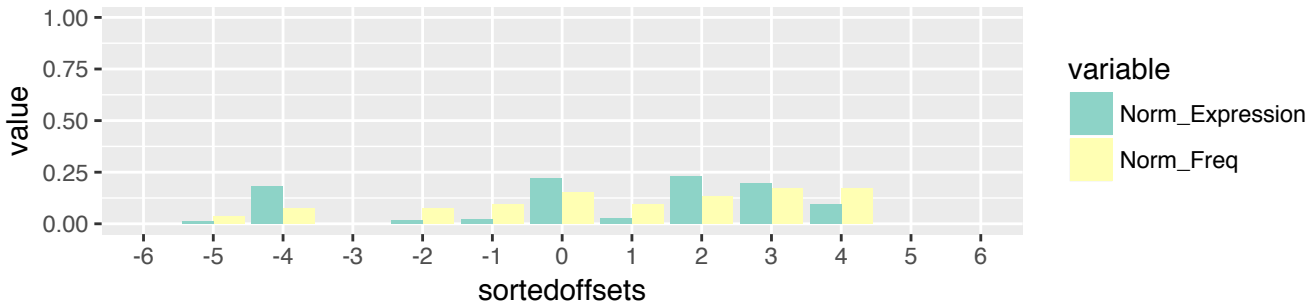

KICH (n=1003)  
i-tRF & exclusive (n=197)  
5' terminus relative to 5' stem of D-loop (n=53)

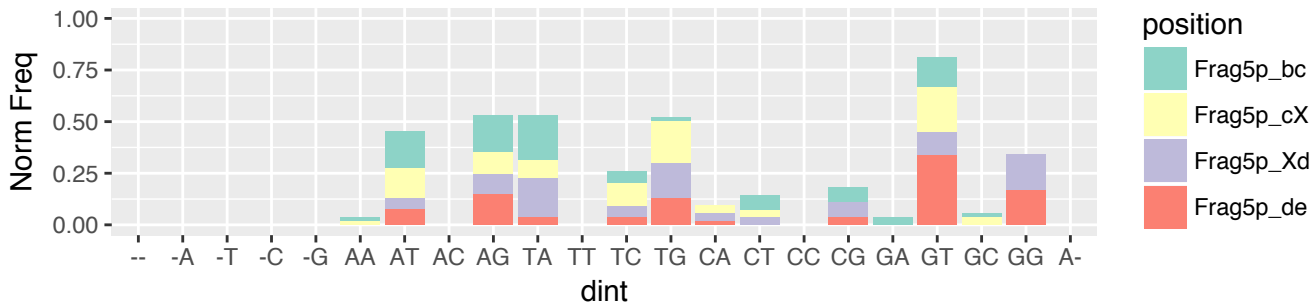

KICH (n=1003)  
i-tRF & exclusive (n=197)  
5' terminus relative to 5' stem of D-loop (n=53)

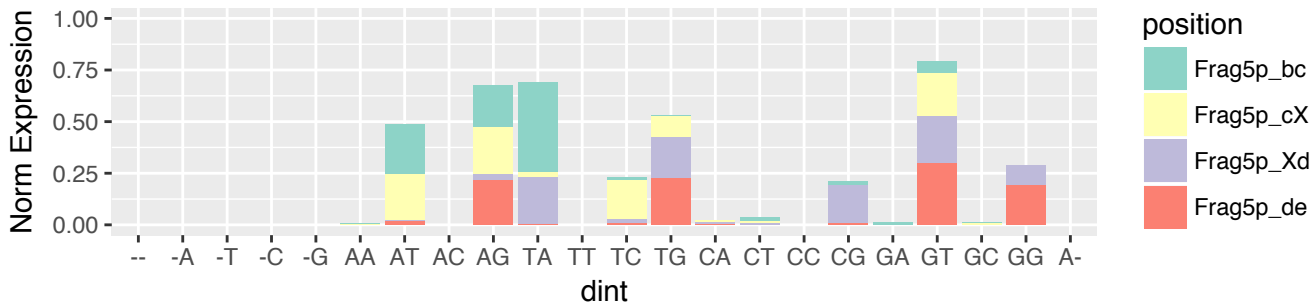

KICH (n=1003)  
 i-tRF & exclusive (n=197)  
 5' terminus relative to 3' stem of D-loop (n=22)

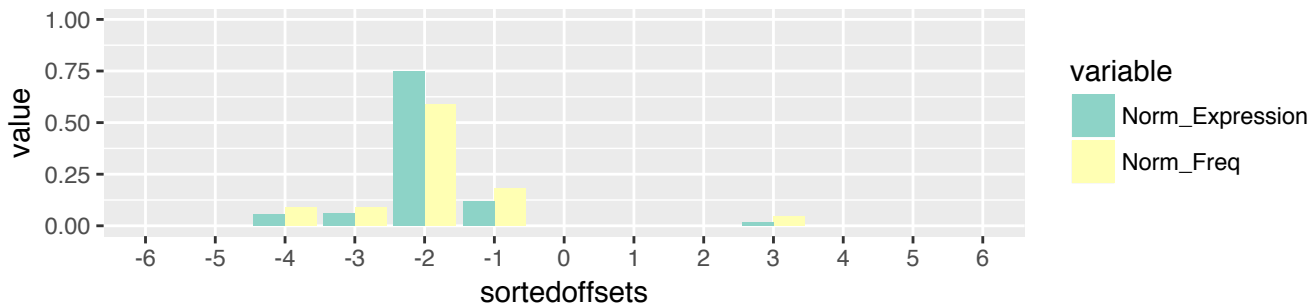

KICH (n=1003)  
 i-tRF & exclusive (n=197)  
 5' terminus relative to 3' stem of D-loop (n=22)

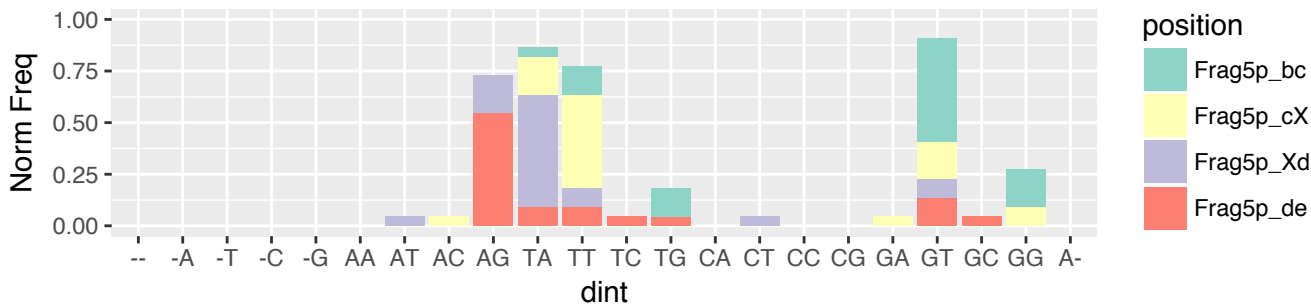

KICH (n=1003)  
 i-tRF & exclusive (n=197)  
 5' terminus relative to 3' stem of D-loop (n=22)

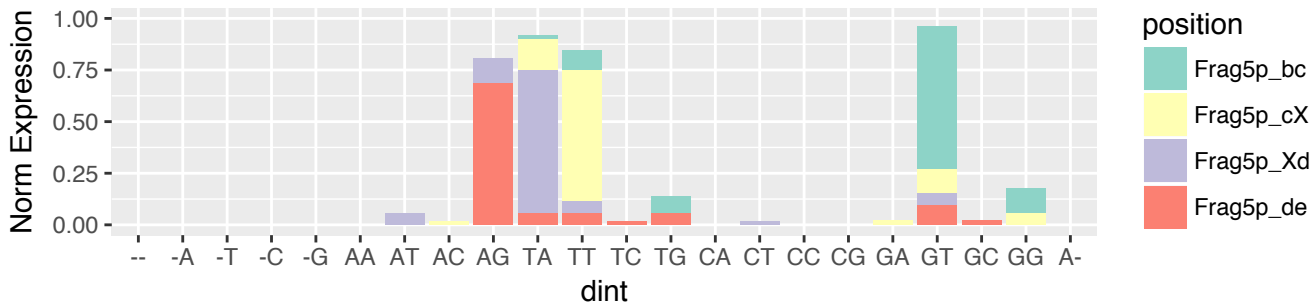

KICH (n=1003)  
 i-tRF & exclusive (n=197)  
 5' terminus relative to 5' stem of A-loop (n=34)

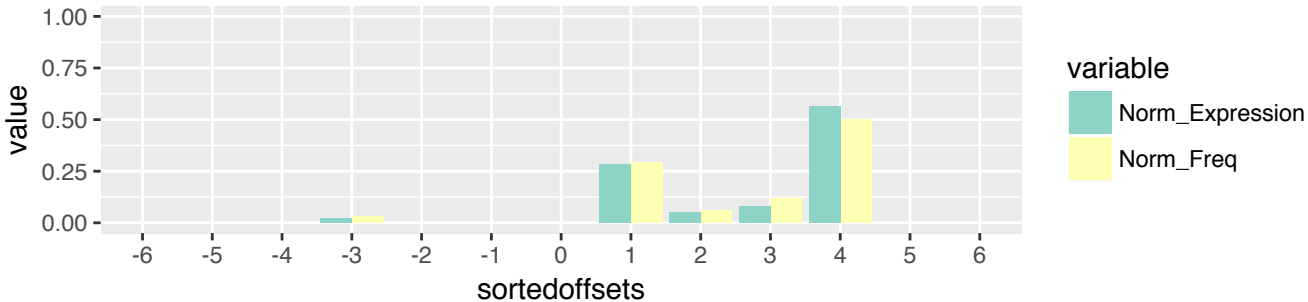

KICH (n=1003)  
 i-tRF & exclusive (n=197)  
 5' terminus relative to 5' stem of A-loop (n=34)

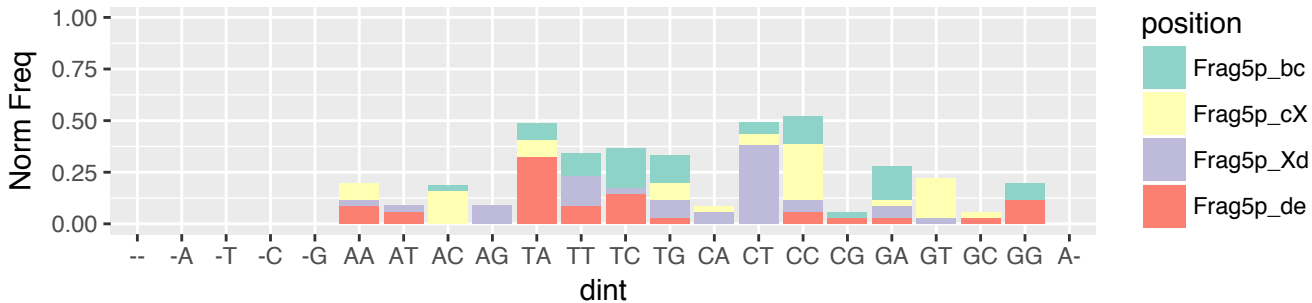

KICH (n=1003)  
 i-tRF & exclusive (n=197)  
 5' terminus relative to 5' stem of A-loop (n=34)

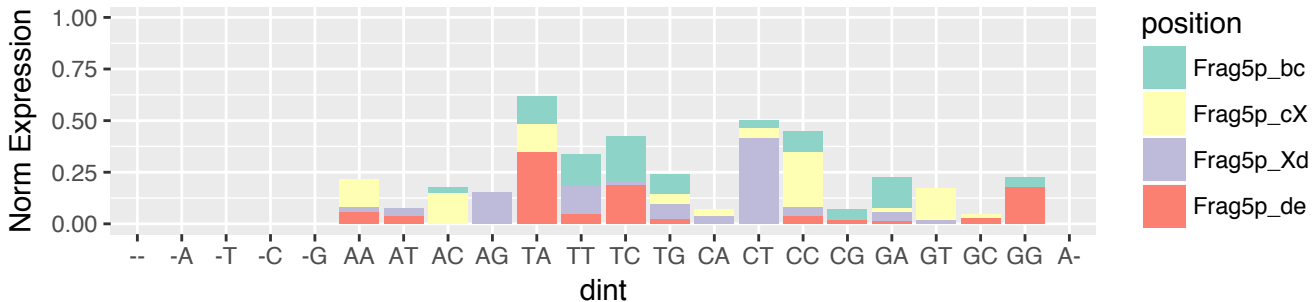

KICH (n=1003)  
 i-tRF & exclusive (n=197)  
 5' terminus relative to 3' stem of A-loop (n=48)

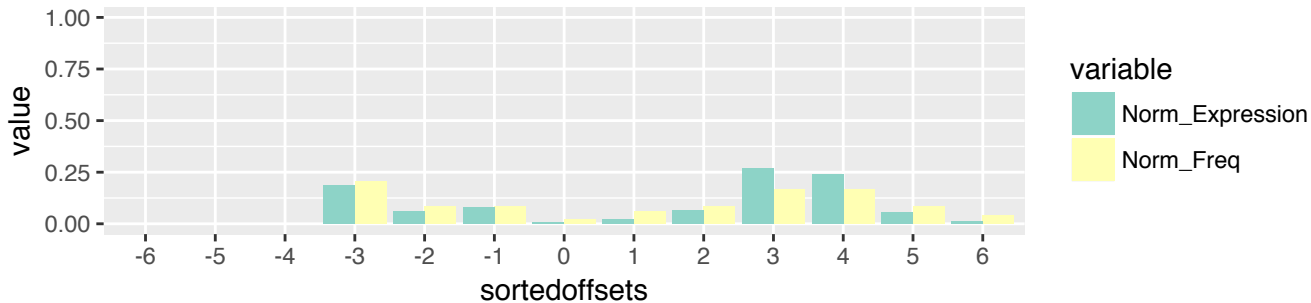

KICH (n=1003)  
 i-tRF & exclusive (n=197)  
 5' terminus relative to 3' stem of A-loop (n=48)

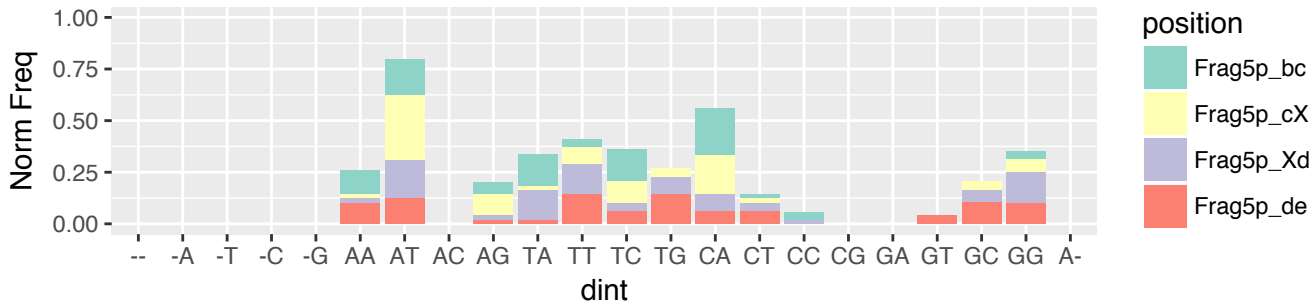

KICH (n=1003)  
 i-tRF & exclusive (n=197)  
 5' terminus relative to 3' stem of A-loop (n=48)

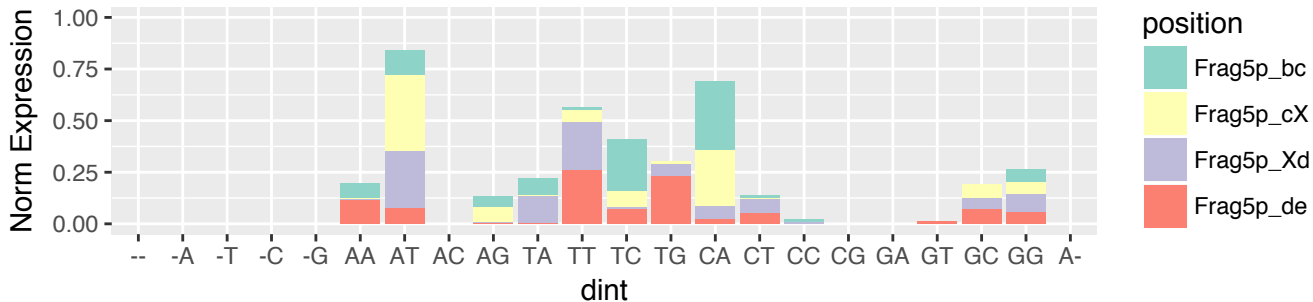



KICH (n=1003)  
i-tRF & exclusive (n=197)  
5' terminus relative to 5' stem of T-loop (n=31)

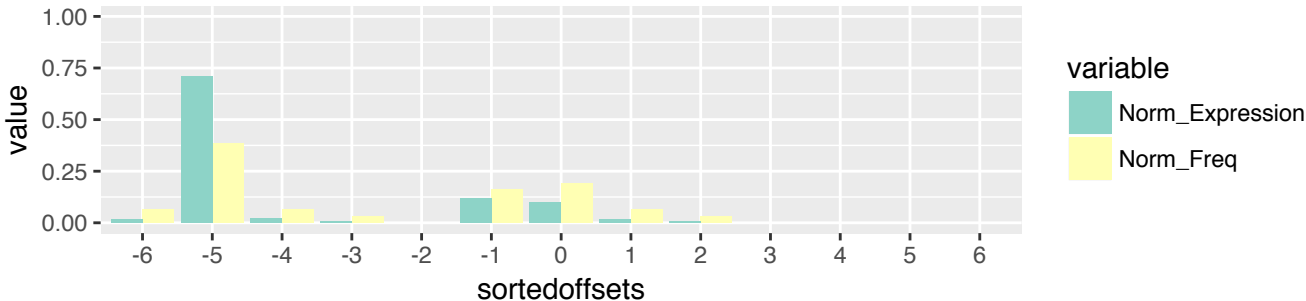

KICH (n=1003)  
i-tRF & exclusive (n=197)  
5' terminus relative to 5' stem of T-loop (n=31)

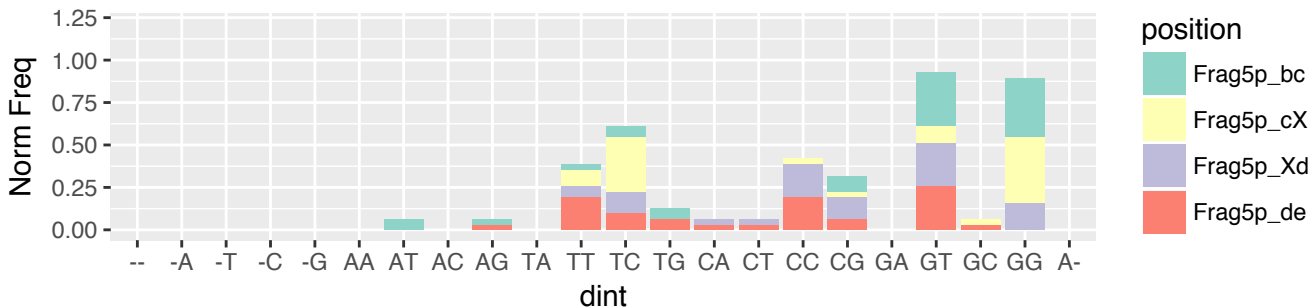

KICH (n=1003)  
i-tRF & exclusive (n=197)  
5' terminus relative to 5' stem of T-loop (n=31)

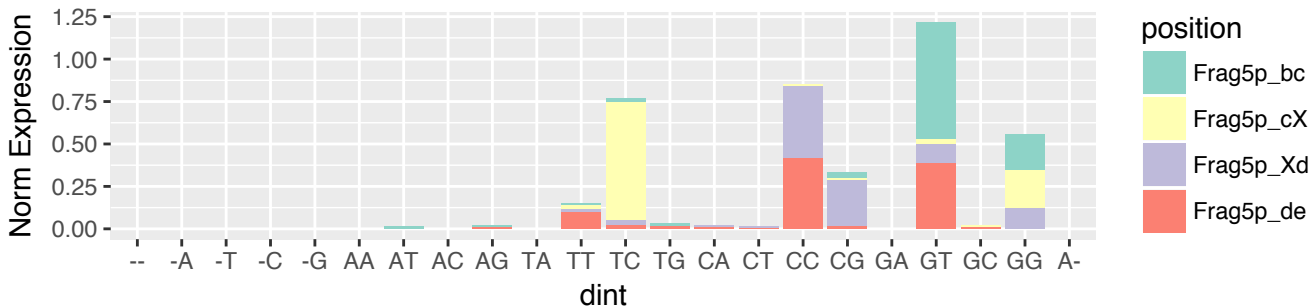

KICH (n=1003)  
i-tRF & exclusive (n=197)  
5' terminus relative to 3' stem of T-loop (n=1)

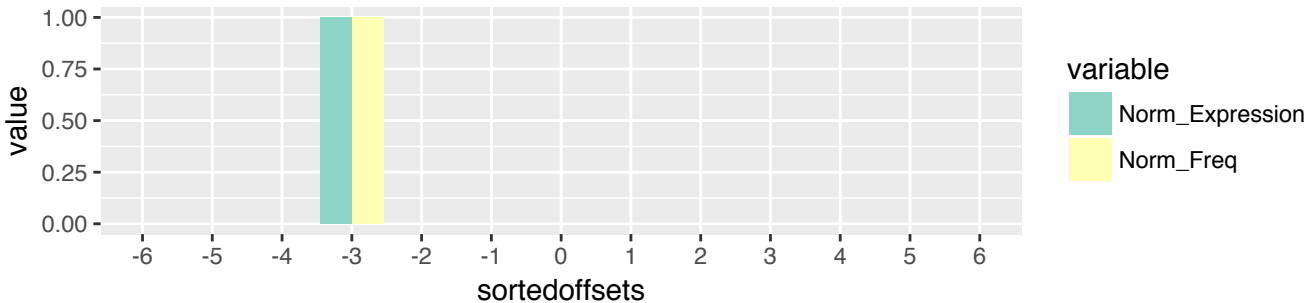

KICH (n=1003)  
i-tRF & exclusive (n=197)  
5' terminus relative to 3' stem of T-loop (n=1)

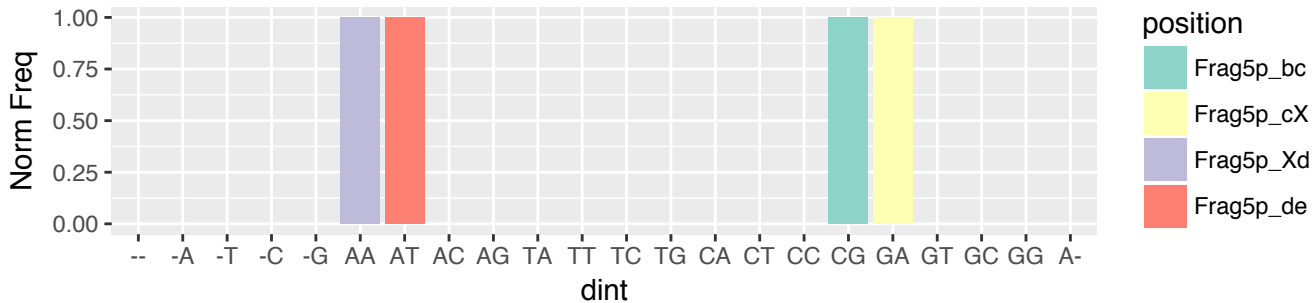

KICH (n=1003)  
i-tRF & exclusive (n=197)  
5' terminus relative to 3' stem of T-loop (n=1)

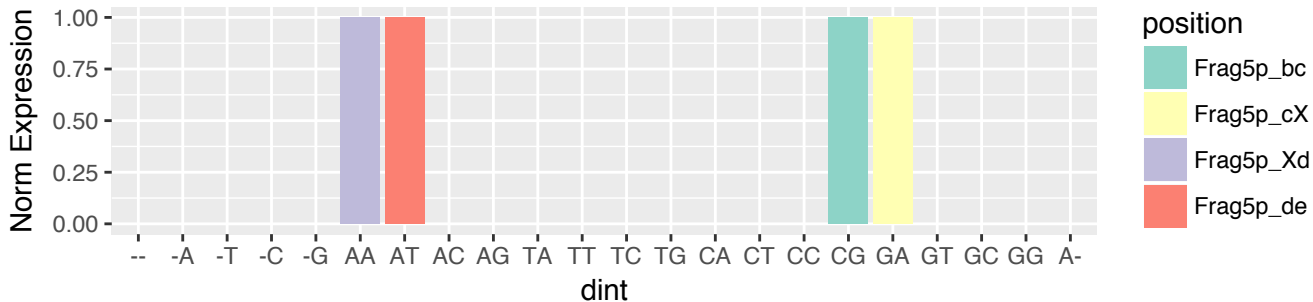

KICH (n=1003)  
i-tRF & exclusive (n=197)  
3' terminus relative to 3' stem of D-loop (n=8)

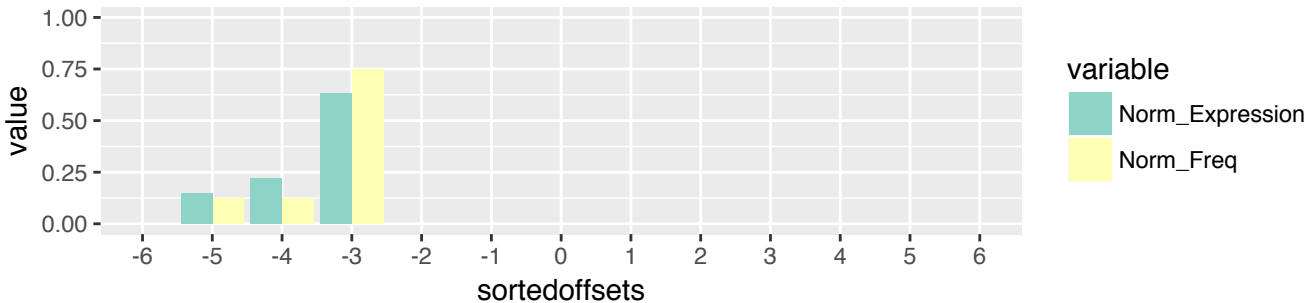

KICH (n=1003)  
i-tRF & exclusive (n=197)  
3' terminus relative to 3' stem of D-loop (n=8)

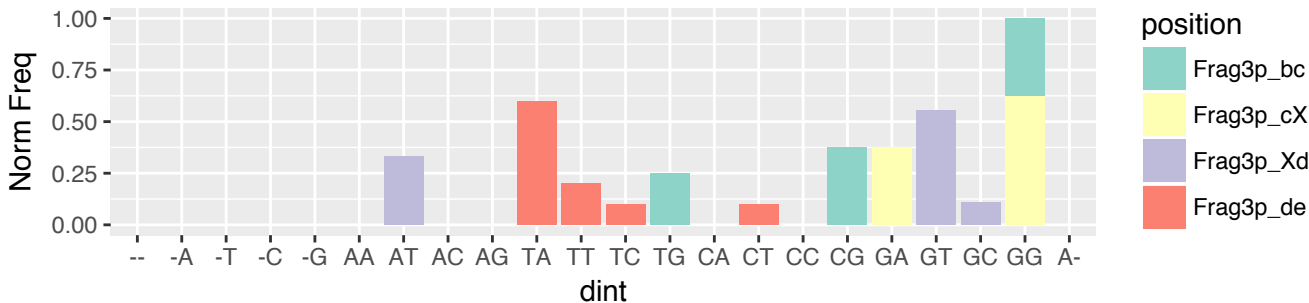

KICH (n=1003)  
i-tRF & exclusive (n=197)  
3' terminus relative to 3' stem of D-loop (n=8)

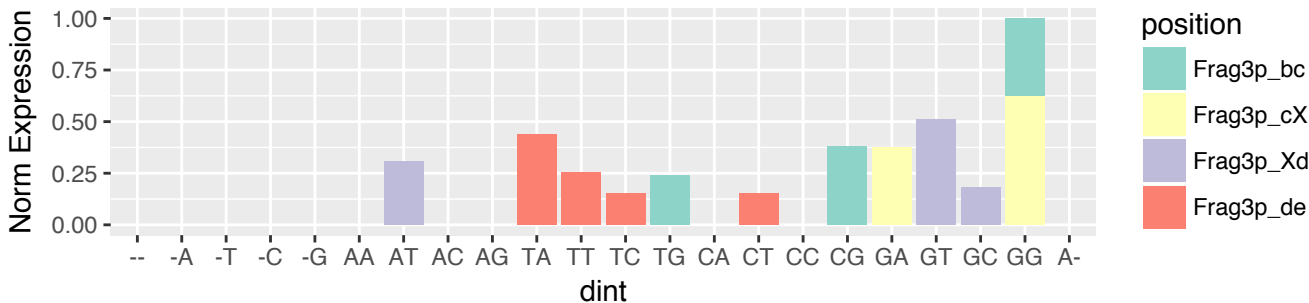

KICH (n=1003)  
 i-tRF & exclusive (n=197)  
 3' terminus relative to 5' stem of A-loop (n=43)

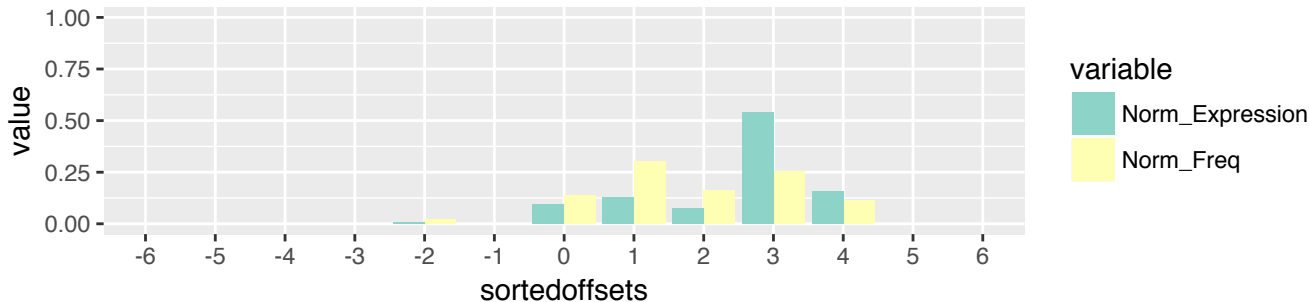

KICH (n=1003)  
 i-tRF & exclusive (n=197)  
 3' terminus relative to 5' stem of A-loop (n=43)

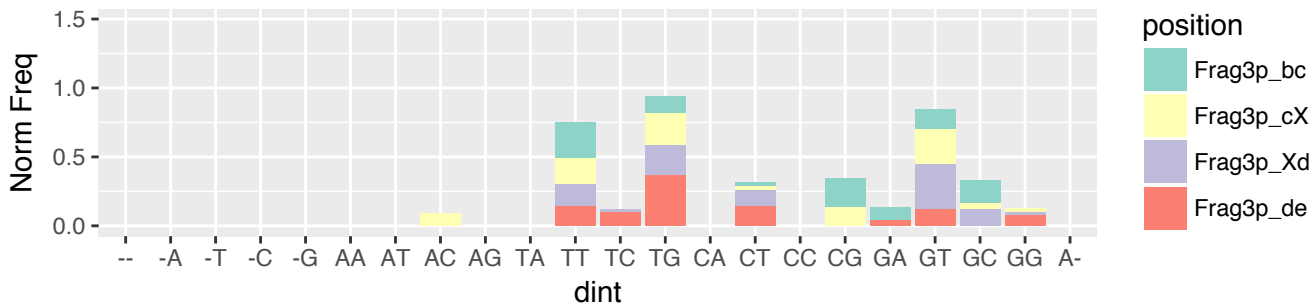

KICH (n=1003)  
 i-tRF & exclusive (n=197)  
 3' terminus relative to 5' stem of A-loop (n=43)

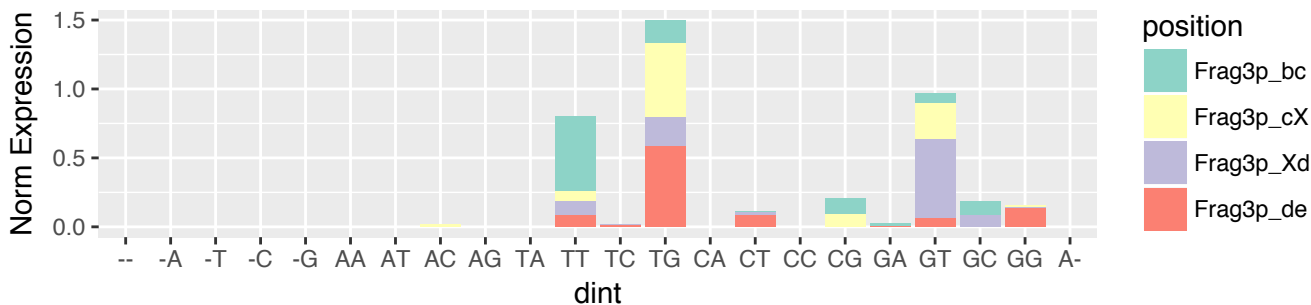

KICH (n=1003)  
i-tRF & exclusive (n=197)  
3' terminus relative to 3' stem of A-loop (n=34)

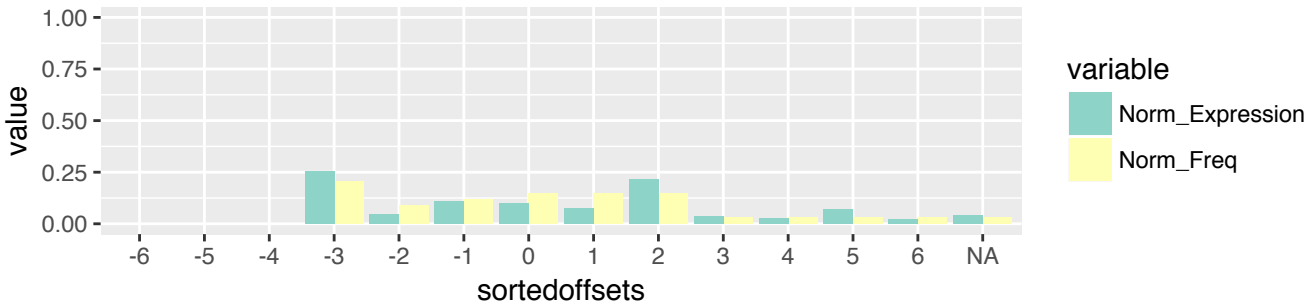

KICH (n=1003)  
i-tRF & exclusive (n=197)  
3' terminus relative to 3' stem of A-loop (n=34)

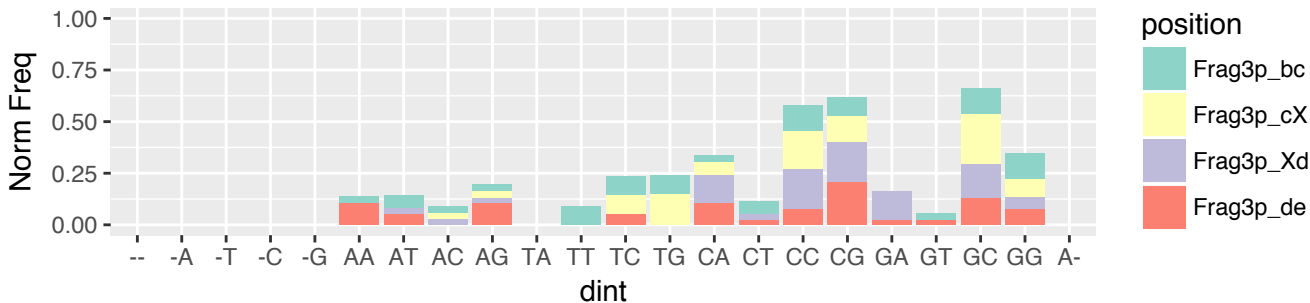

KICH (n=1003)  
i-tRF & exclusive (n=197)  
3' terminus relative to 3' stem of A-loop (n=34)

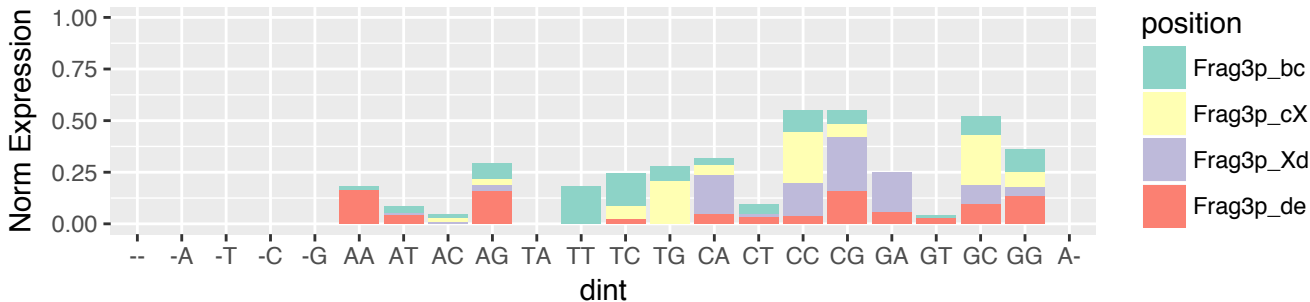

KICH (n=1003)  
i-tRF & exclusive (n=197)  
3' terminus relative to 5' stem of T-loop (n=47)

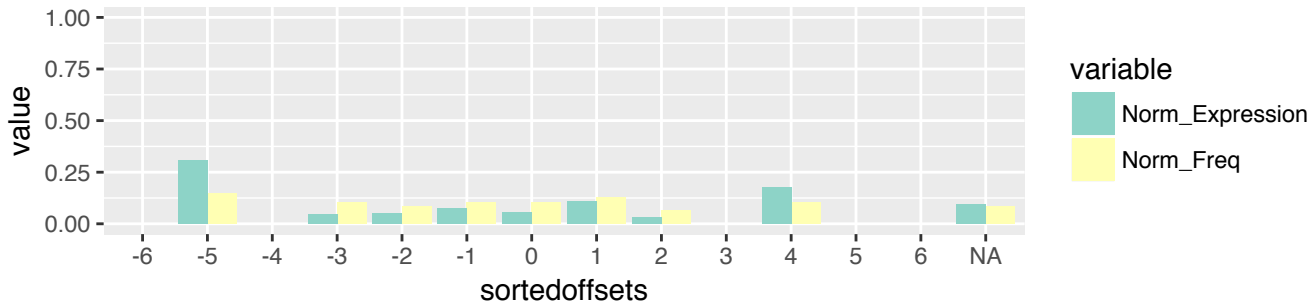

KICH (n=1003)  
i-tRF & exclusive (n=197)  
3' terminus relative to 5' stem of T-loop (n=47)

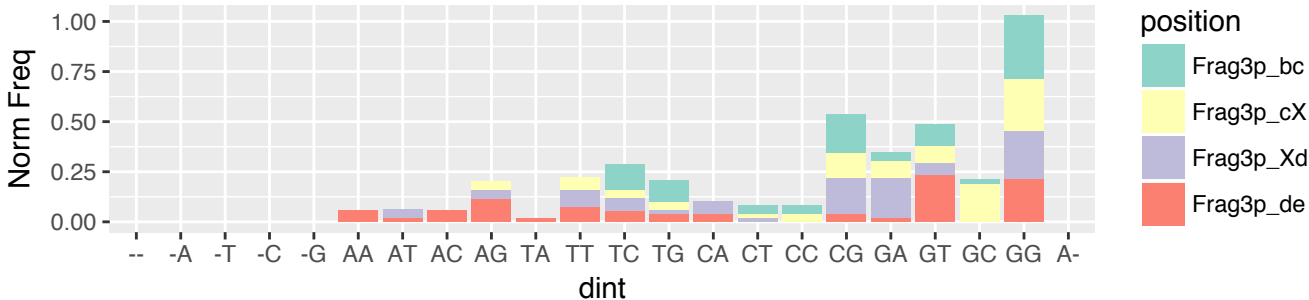

KICH (n=1003)  
i-tRF & exclusive (n=197)  
3' terminus relative to 5' stem of T-loop (n=47)

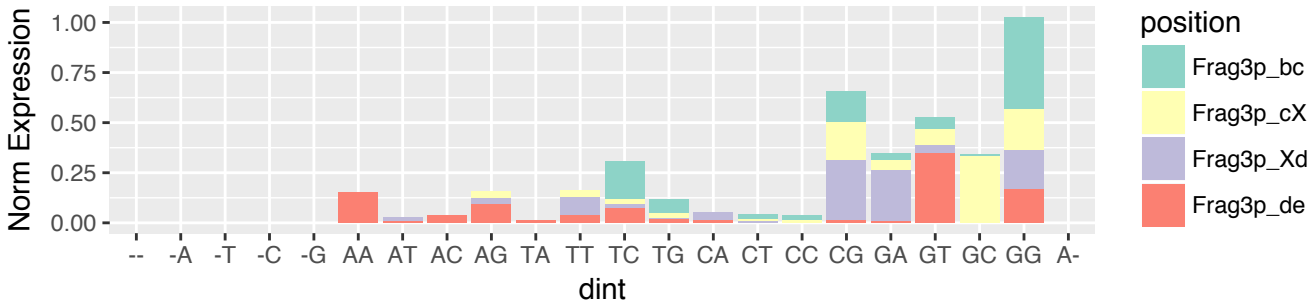

KICH (n=1003)  
i-tRF & exclusive (n=197)  
3' terminus relative to 3' stem of T-loop (n=37)

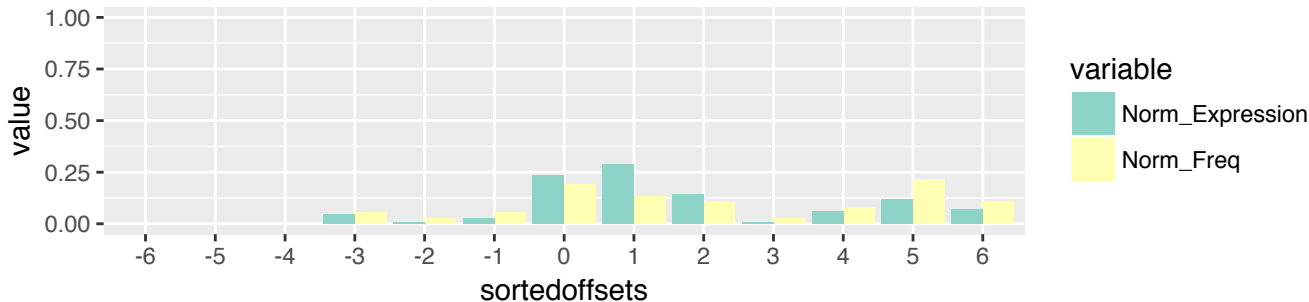

KICH (n=1003)  
i-tRF & exclusive (n=197)  
3' terminus relative to 3' stem of T-loop (n=37)

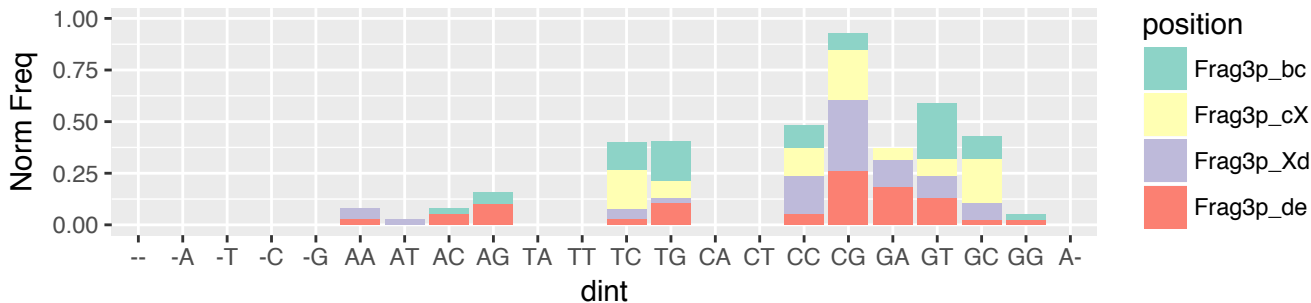

KICH (n=1003)  
i-tRF & exclusive (n=197)  
3' terminus relative to 3' stem of T-loop (n=37)

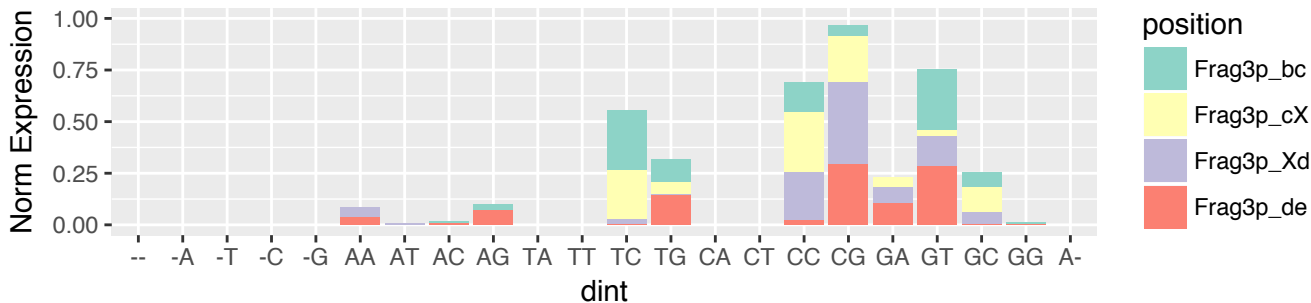

KICH (n=1003)  
 i-tRF & exclusive (n=197)  
 3' terminus relative to 3' end of the tRNA (n=29)

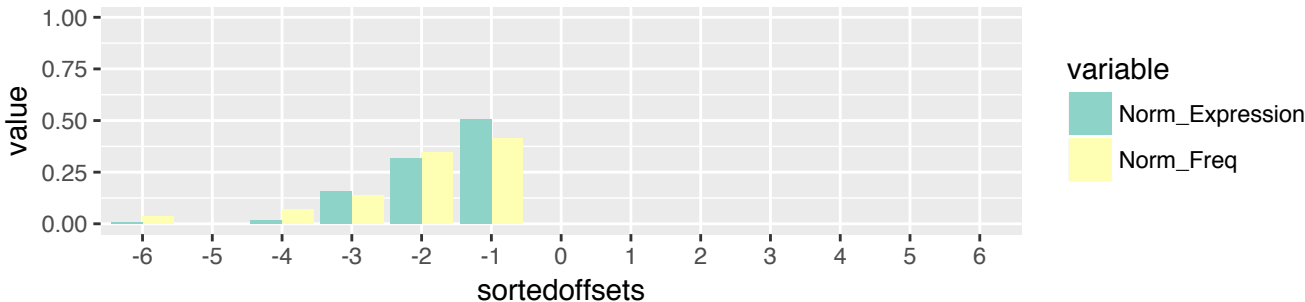

KICH (n=1003)  
 i-tRF & exclusive (n=197)  
 3' terminus relative to 3' end of the tRNA (n=29)

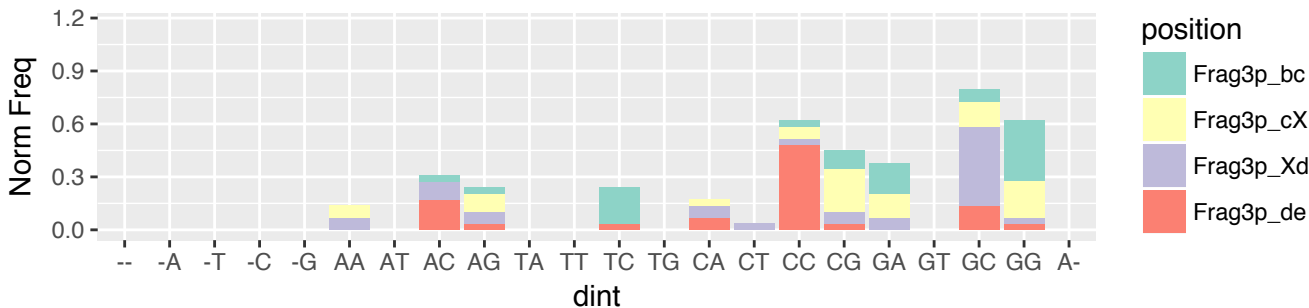

KICH (n=1003)  
 i-tRF & exclusive (n=197)  
 3' terminus relative to 3' end of the tRNA (n=29)

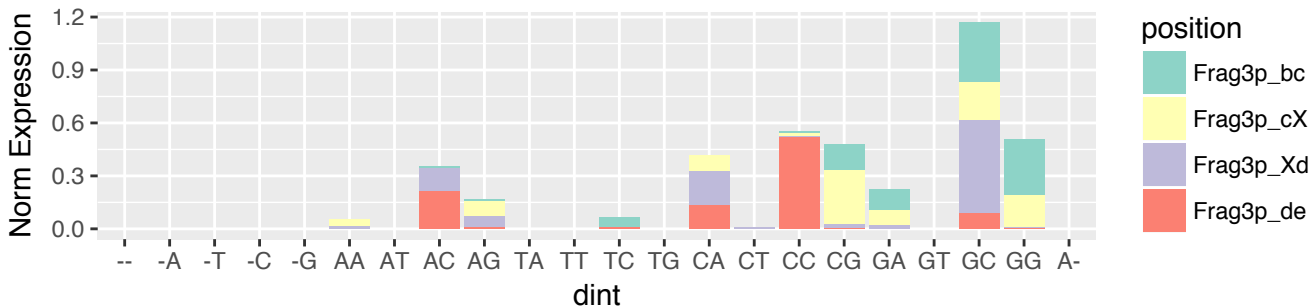



KICH (n=1003)  
 3'-tRF & exclusive (n=187)  
 5' terminus relative to 5' stem of T-loop (n=108)

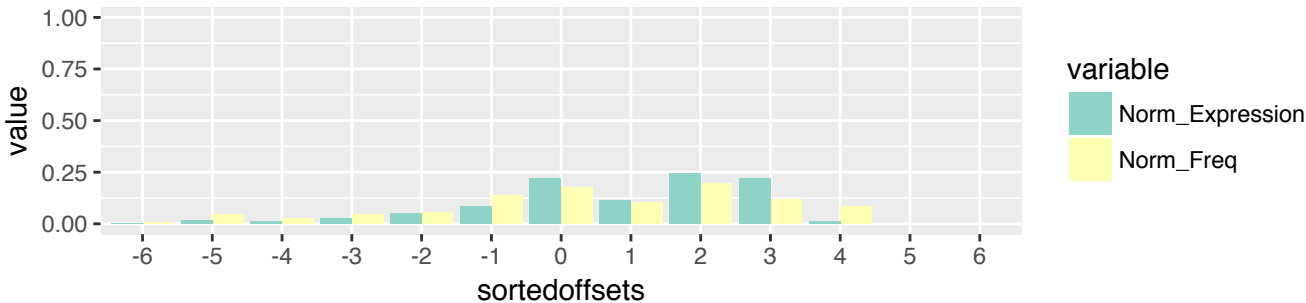

KICH (n=1003)  
 3'-tRF & exclusive (n=187)  
 5' terminus relative to 5' stem of T-loop (n=108)

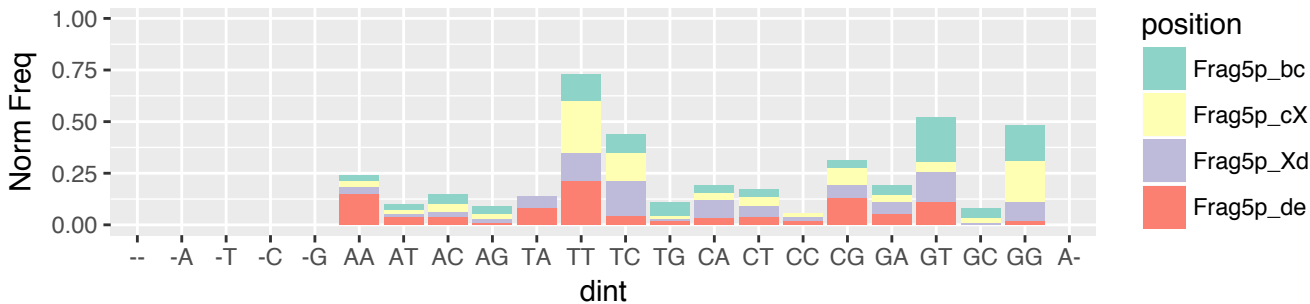

KICH (n=1003)  
 3'-tRF & exclusive (n=187)  
 5' terminus relative to 5' stem of T-loop (n=108)

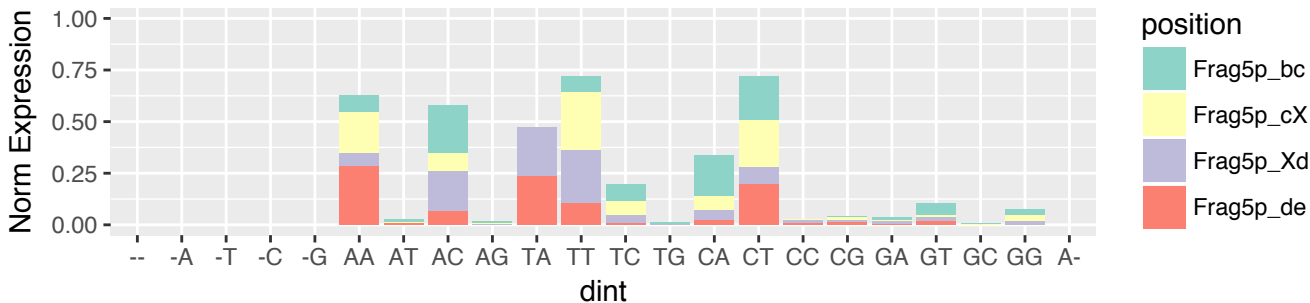

KICH (n=1003)  
 3'-tRF & exclusive (n=187)  
 5' terminus relative to 3' stem of T-loop (n=79)

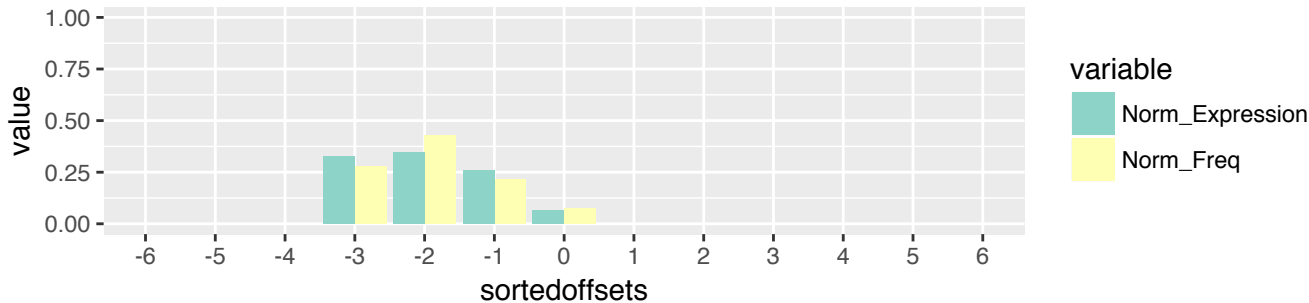

KICH (n=1003)  
 3'-tRF & exclusive (n=187)  
 5' terminus relative to 3' stem of T-loop (n=79)

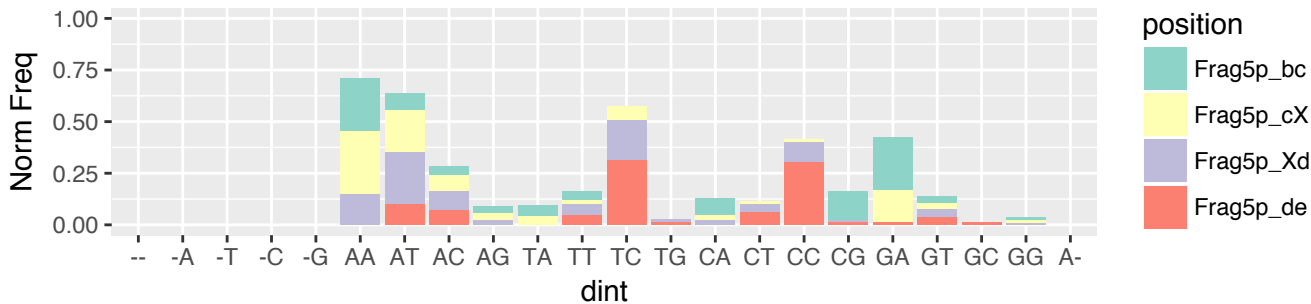

KICH (n=1003)  
 3'-tRF & exclusive (n=187)  
 5' terminus relative to 3' stem of T-loop (n=79)

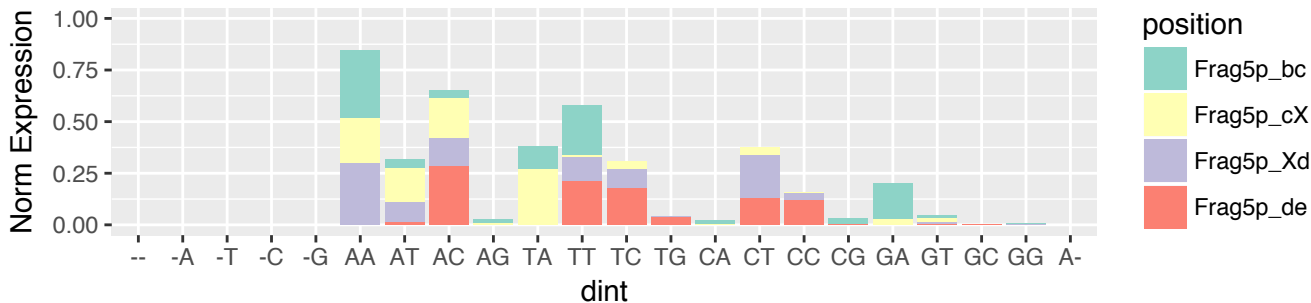

KICH (n=1003)  
 3'-tRF & exclusive (n=187)  
 3' terminus relative to 3' end of the tRNA (n=187)

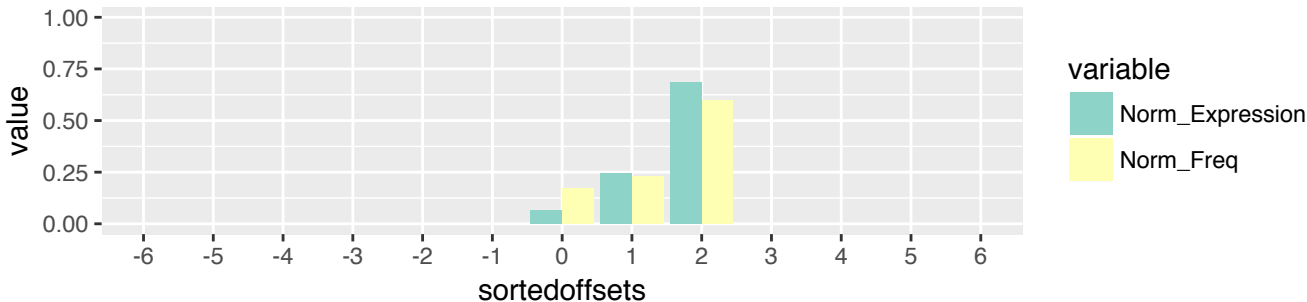

KICH (n=1003)  
 3'-tRF & exclusive (n=187)  
 3' terminus relative to 3' end of the tRNA (n=187)

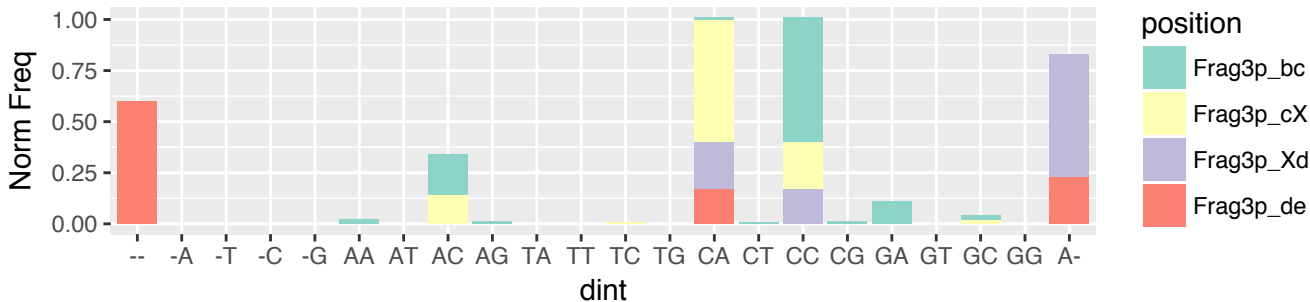

KICH (n=1003)  
 3'-tRF & exclusive (n=187)  
 3' terminus relative to 3' end of the tRNA (n=187)

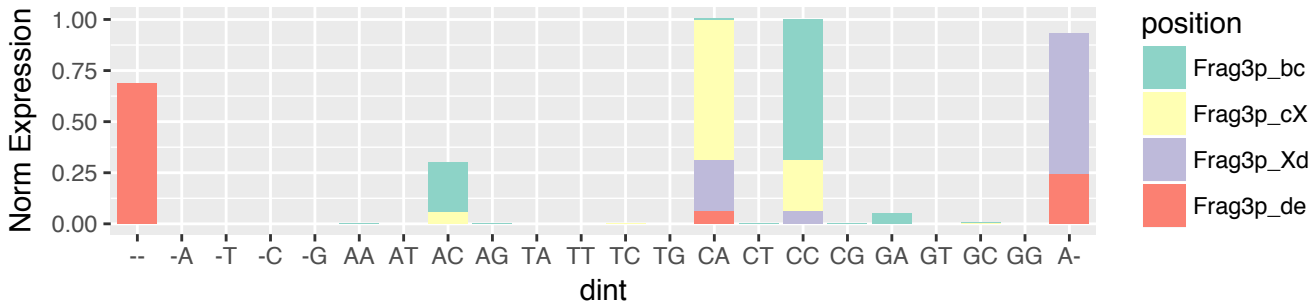

KIRC (n=907)  
 5'-half & exclusive (n=4)  
 5' terminus relative to 5' end of the tRNA (n=4)

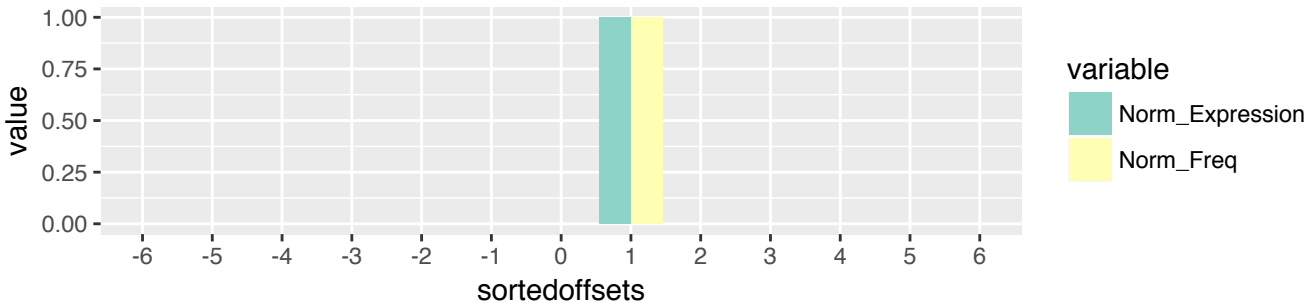

KIRC (n=907)  
 5'-half & exclusive (n=4)  
 5' terminus relative to 5' end of the tRNA (n=4)



KIRC (n=907)  
 5'-half & exclusive (n=4)  
 5' terminus relative to 5' end of the tRNA (n=4)

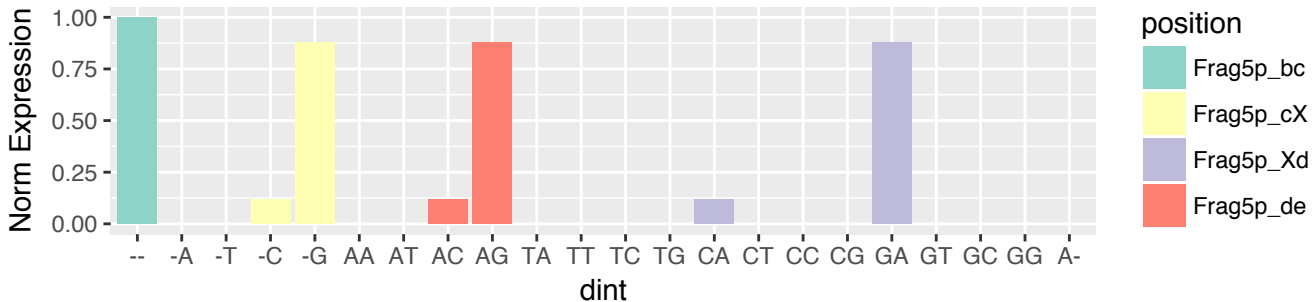

KIRC (n=907)

5'-half & exclusive (n=4)

3' terminus relative to 5' stem of A-loop (n=4)

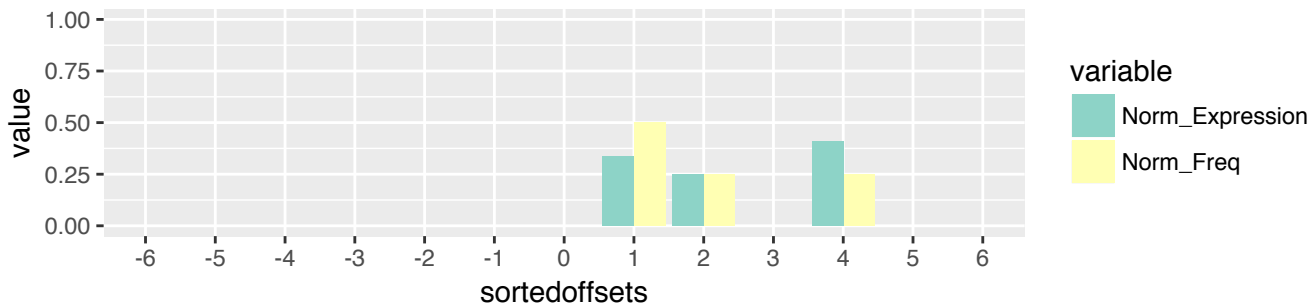

KIRC (n=907)

5'-half & exclusive (n=4)

3' terminus relative to 5' stem of A-loop (n=4)



KIRC (n=907)

5'-half & exclusive (n=4)

3' terminus relative to 5' stem of A-loop (n=4)

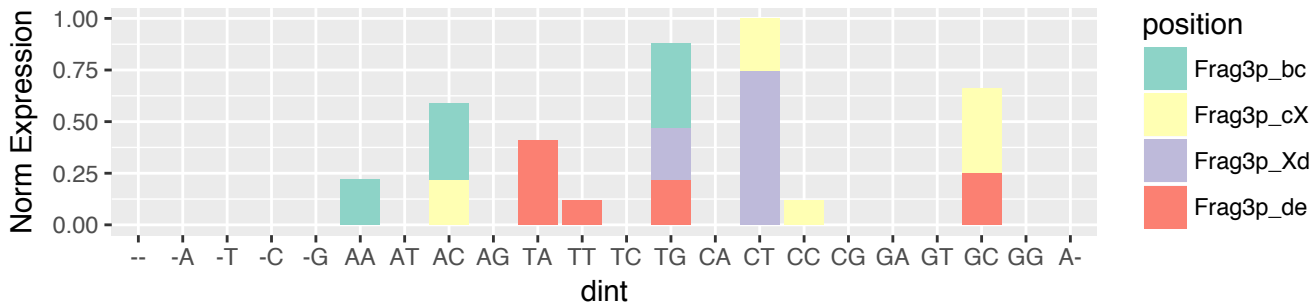

KIRC (n=907)  
 5'-tRF & exclusive (n=160)  
 5' terminus relative to 5' end of the tRNA (n=160)

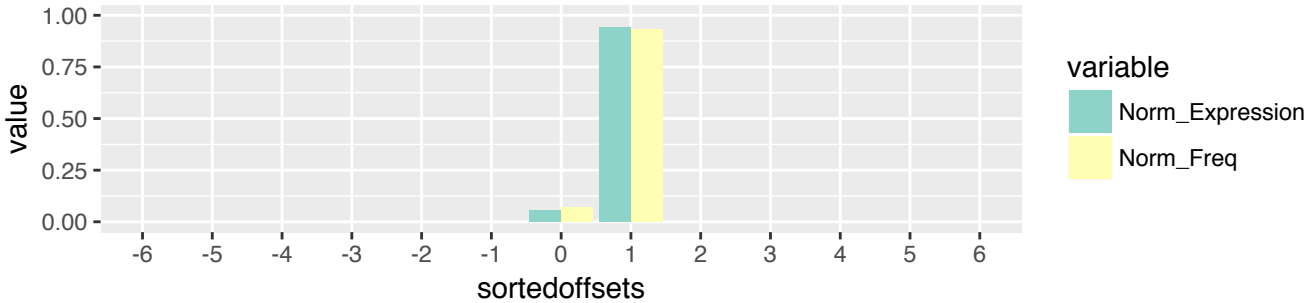

KIRC (n=907)  
 5'-tRF & exclusive (n=160)  
 5' terminus relative to 5' end of the tRNA (n=160)

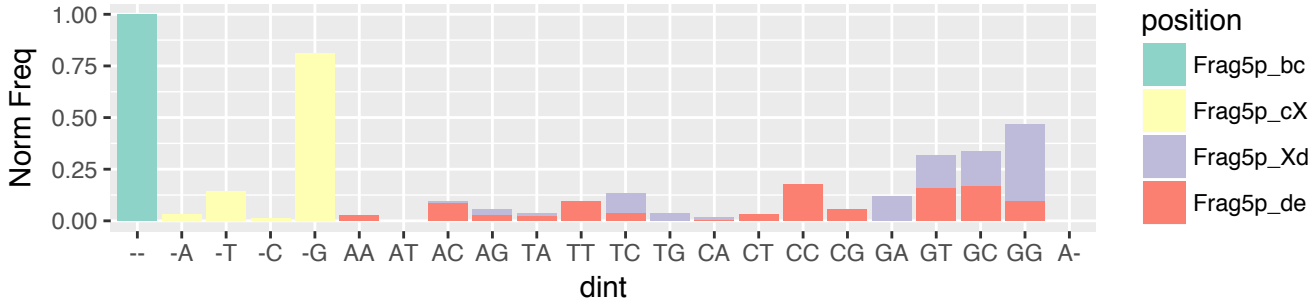

KIRC (n=907)  
 5'-tRF & exclusive (n=160)  
 5' terminus relative to 5' end of the tRNA (n=160)

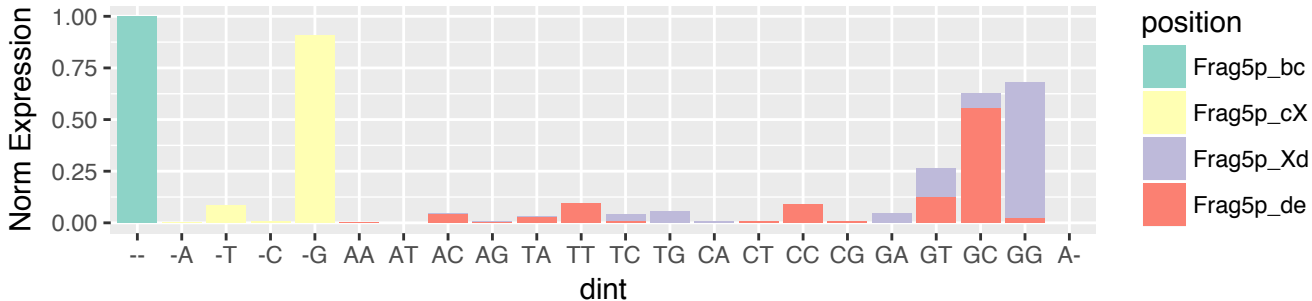

KIRC (n=907)  
 5'-tRF & exclusive (n=160)  
 3' terminus relative to 5' stem of D-loop (n=8)

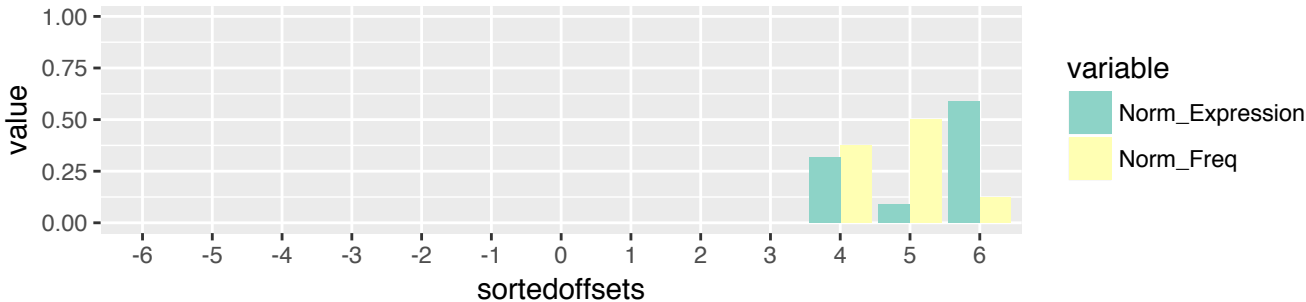

KIRC (n=907)  
 5'-tRF & exclusive (n=160)  
 3' terminus relative to 5' stem of D-loop (n=8)

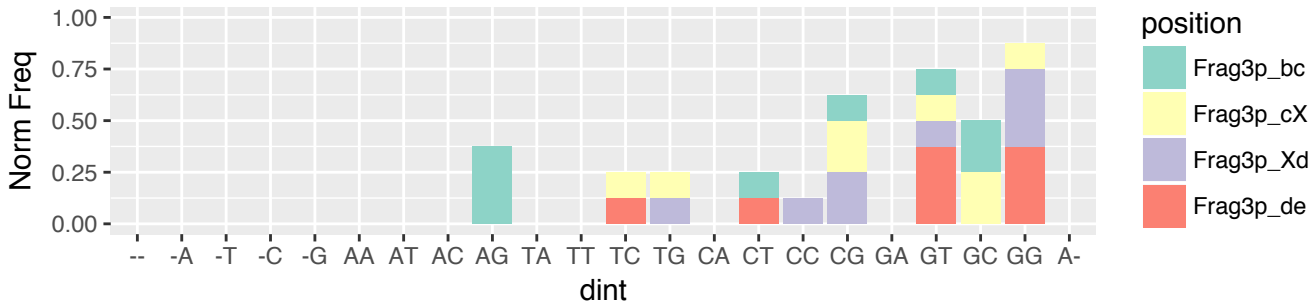

KIRC (n=907)  
 5'-tRF & exclusive (n=160)  
 3' terminus relative to 5' stem of D-loop (n=8)

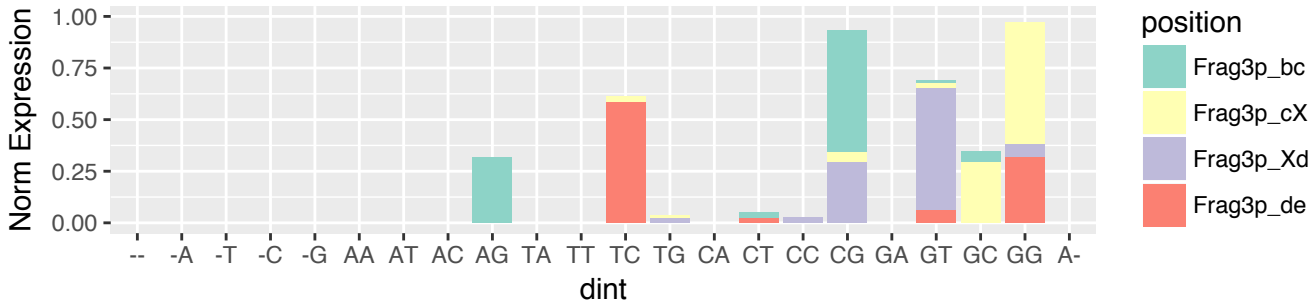

KIRC (n=907)  
 5'-tRF & exclusive (n=160)  
 3' terminus relative to 3' stem of D-loop (n=143)

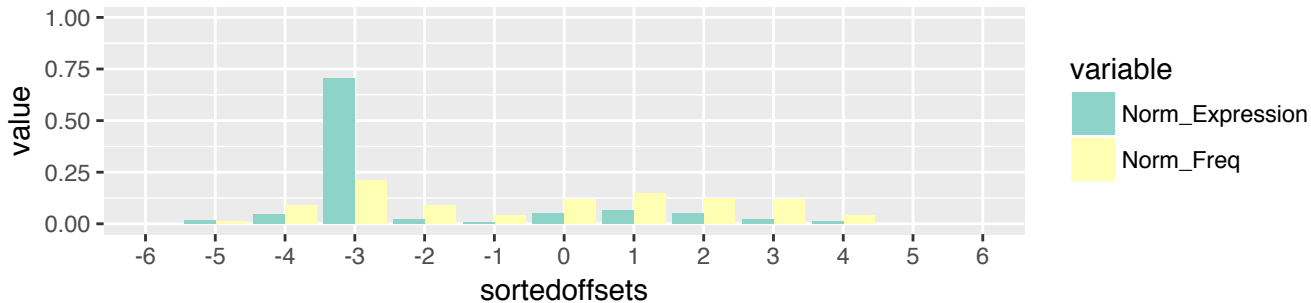

KIRC (n=907)  
 5'-tRF & exclusive (n=160)  
 3' terminus relative to 3' stem of D-loop (n=143)

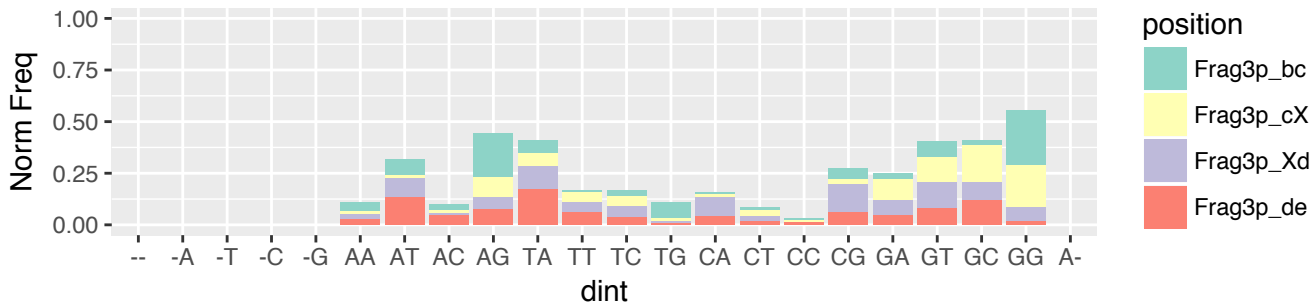

KIRC (n=907)  
 5'-tRF & exclusive (n=160)  
 3' terminus relative to 3' stem of D-loop (n=143)

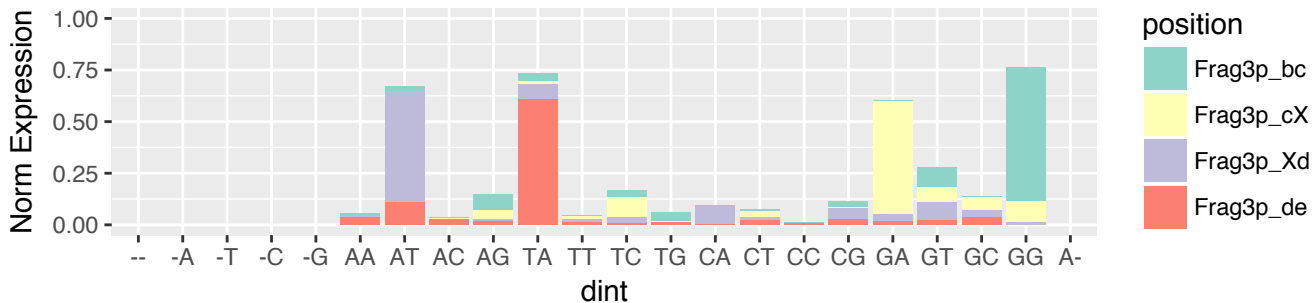



KIRC (n=907)  
 5'-tRF & exclusive (n=160)  
 3' terminus relative to 5' stem of A-loop (n=6)

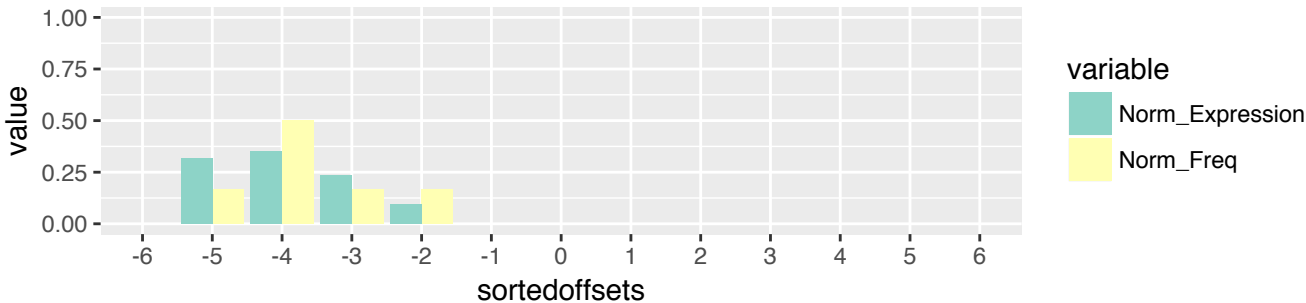

KIRC (n=907)  
 5'-tRF & exclusive (n=160)  
 3' terminus relative to 5' stem of A-loop (n=6)

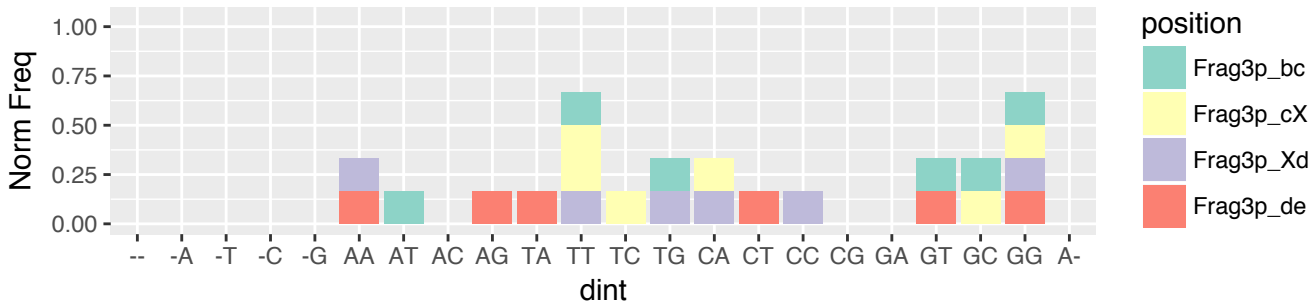

KIRC (n=907)  
 5'-tRF & exclusive (n=160)  
 3' terminus relative to 5' stem of A-loop (n=6)

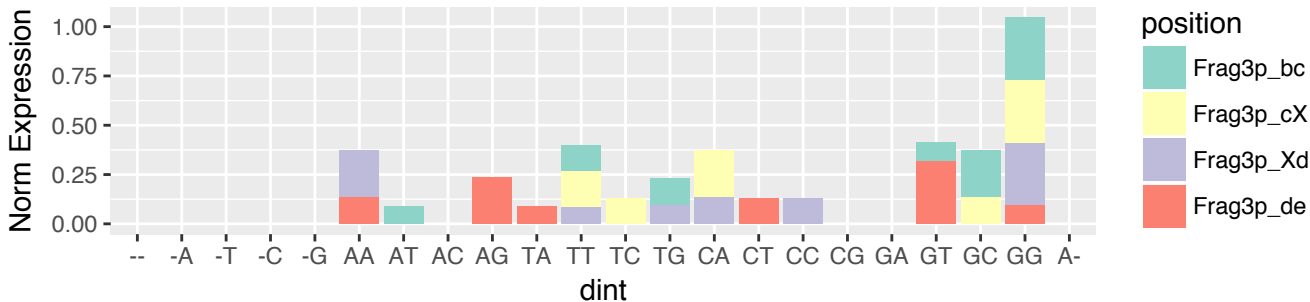

KIRC (n=907)  
 5'-tRF & exclusive (n=160)  
 3' terminus relative to 3' stem of A-loop (n=3)

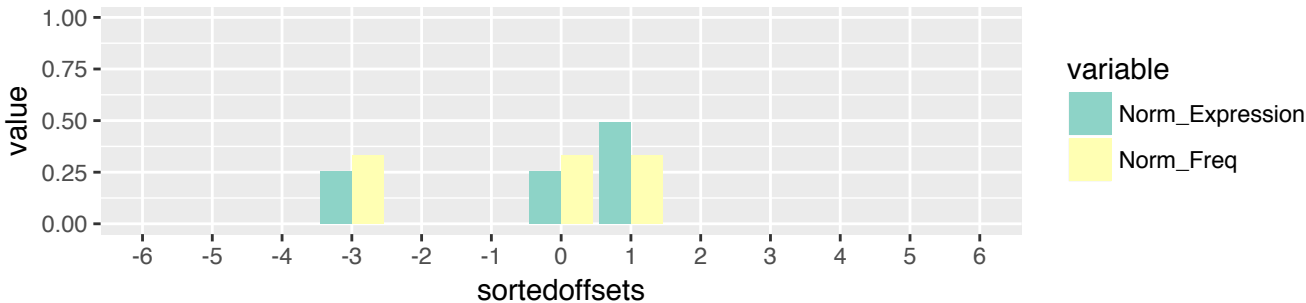

KIRC (n=907)  
 5'-tRF & exclusive (n=160)  
 3' terminus relative to 3' stem of A-loop (n=3)

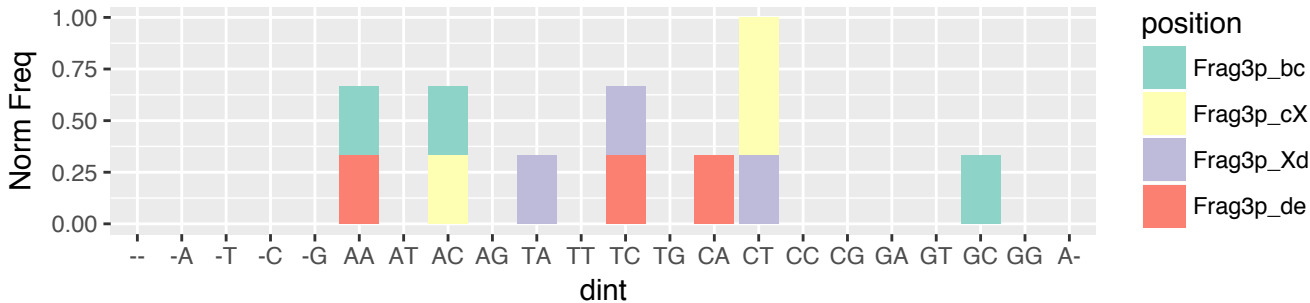

KIRC (n=907)  
 5'-tRF & exclusive (n=160)  
 3' terminus relative to 3' stem of A-loop (n=3)

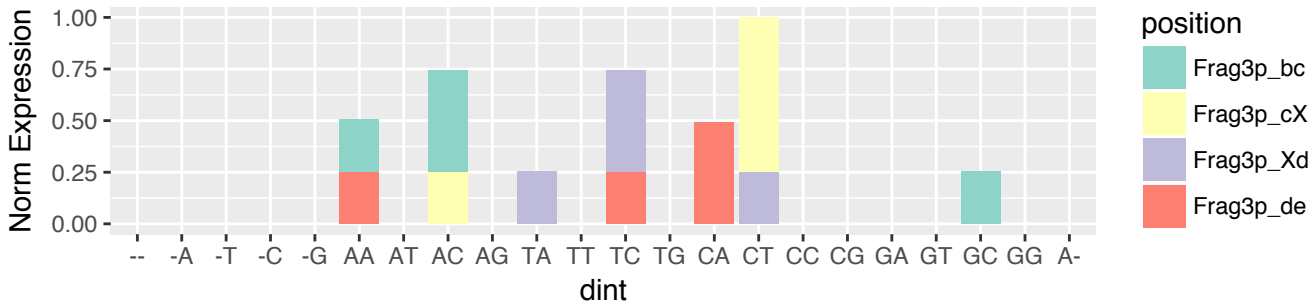

KIRC (n=907)  
i-tRF & exclusive (n=162)  
5' terminus relative to 5' end of the tRNA (n=8)

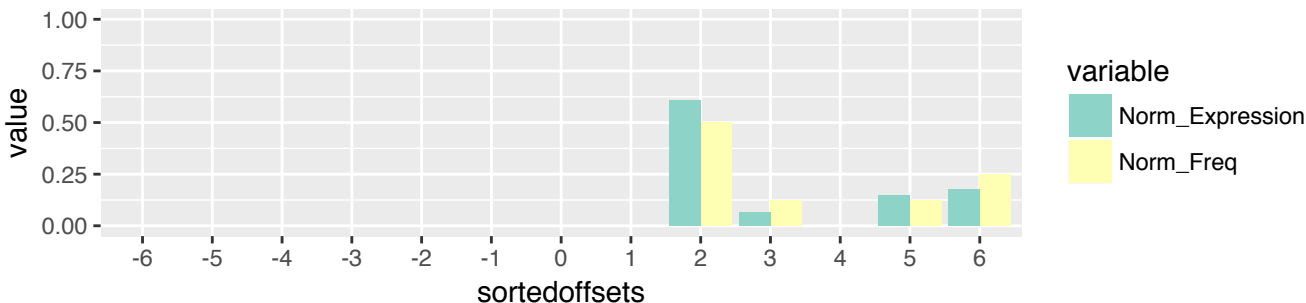

KIRC (n=907)  
i-tRF & exclusive (n=162)  
5' terminus relative to 5' end of the tRNA (n=8)

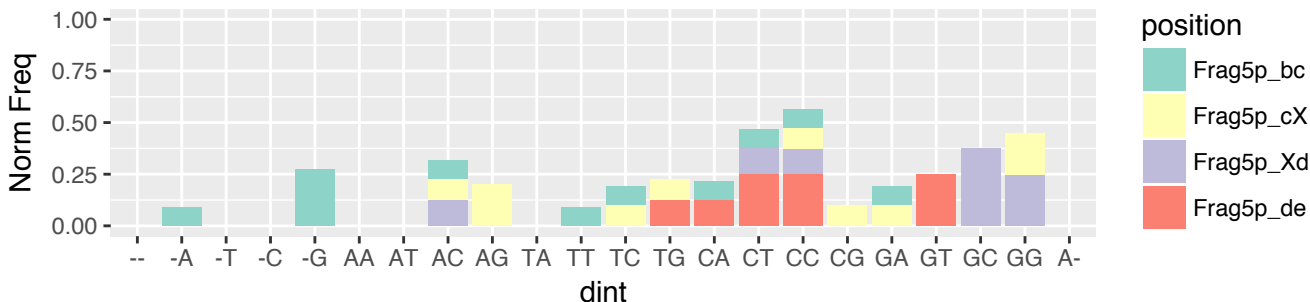

KIRC (n=907)  
i-tRF & exclusive (n=162)  
5' terminus relative to 5' end of the tRNA (n=8)

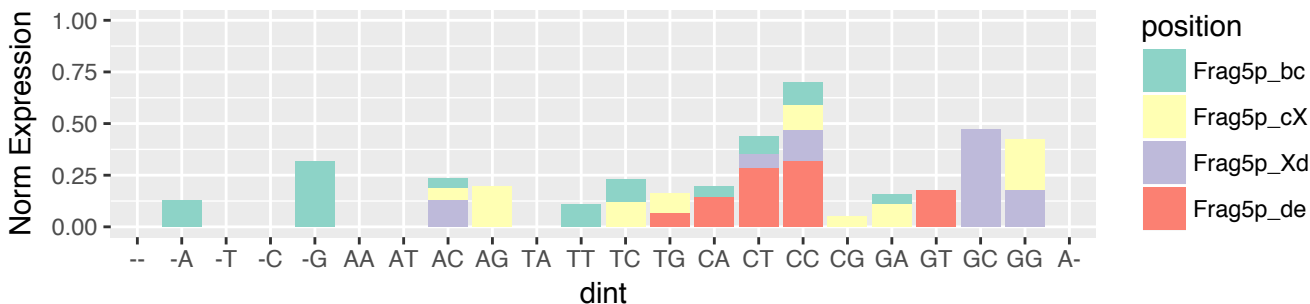

KIRC (n=907)  
 i-tRF & exclusive (n=162)  
 5' terminus relative to 5' stem of D-loop (n=66)

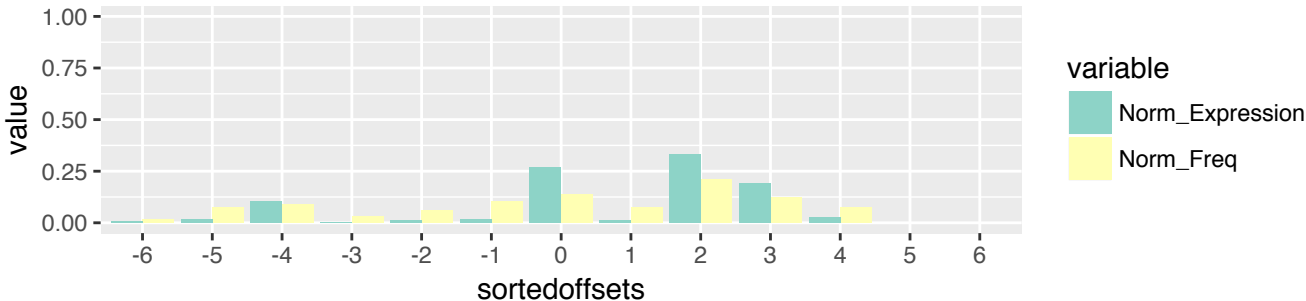

KIRC (n=907)  
 i-tRF & exclusive (n=162)  
 5' terminus relative to 5' stem of D-loop (n=66)

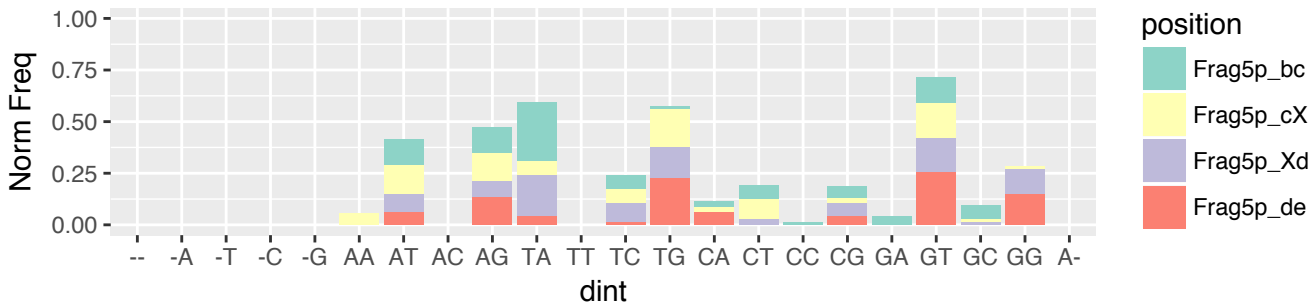

KIRC (n=907)  
 i-tRF & exclusive (n=162)  
 5' terminus relative to 5' stem of D-loop (n=66)

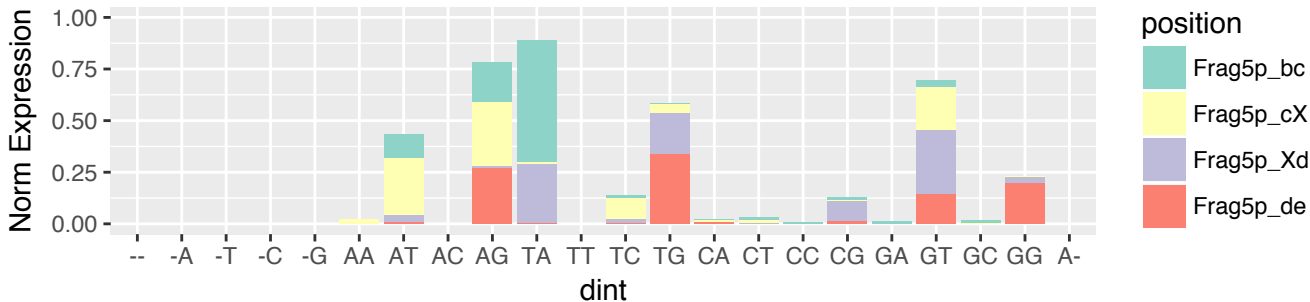

KIRC (n=907)  
 i-tRF & exclusive (n=162)  
 5' terminus relative to 3' stem of D-loop (n=9)

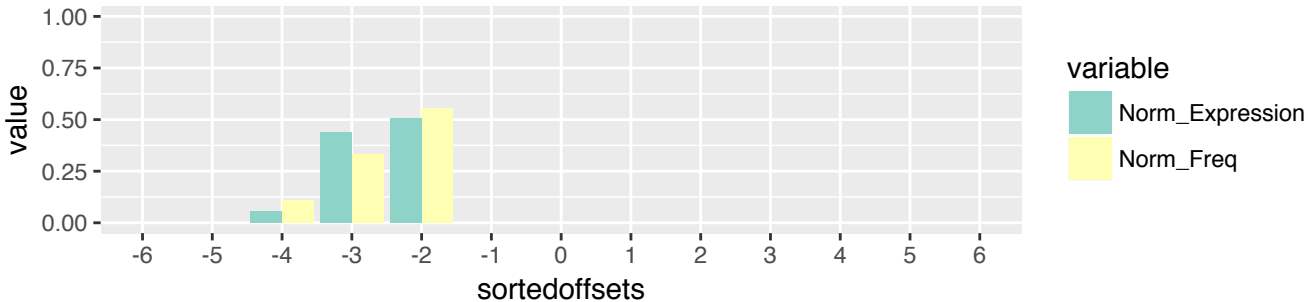

KIRC (n=907)  
 i-tRF & exclusive (n=162)  
 5' terminus relative to 3' stem of D-loop (n=9)

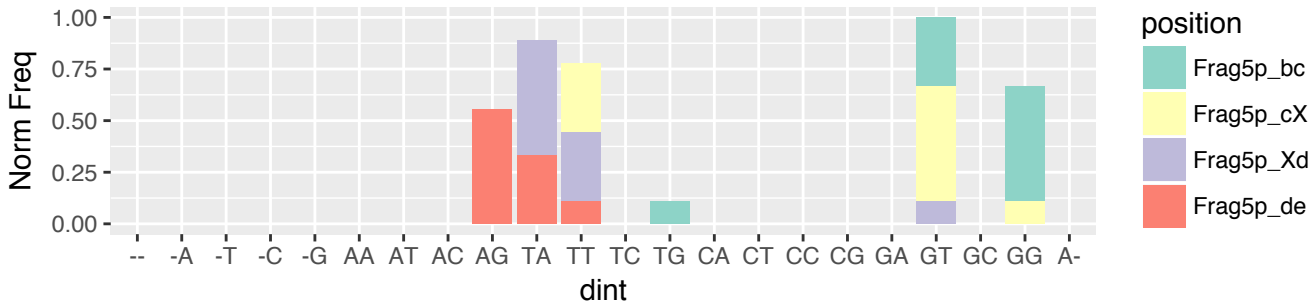

KIRC (n=907)  
 i-tRF & exclusive (n=162)  
 5' terminus relative to 3' stem of D-loop (n=9)

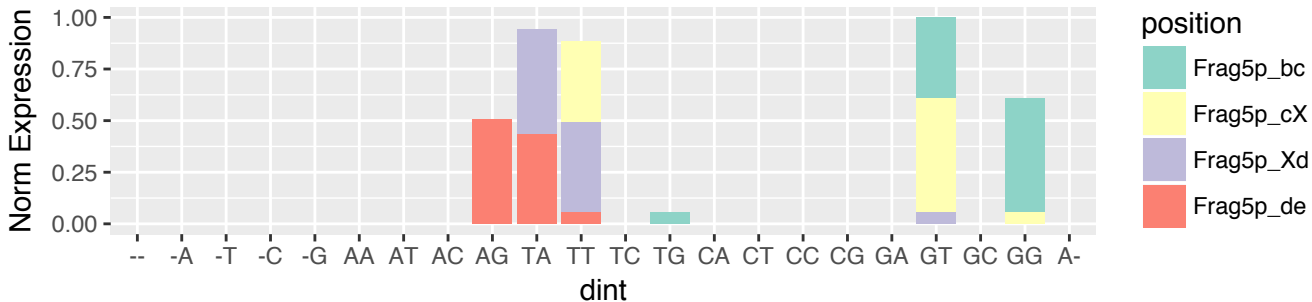

KIRC (n=907)  
 i-tRF & exclusive (n=162)  
 5' terminus relative to 5' stem of A-loop (n=29)

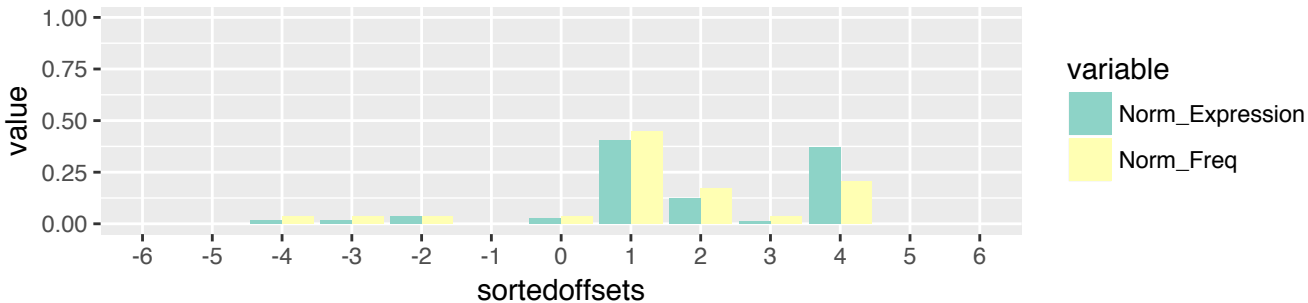

KIRC (n=907)  
 i-tRF & exclusive (n=162)  
 5' terminus relative to 5' stem of A-loop (n=29)

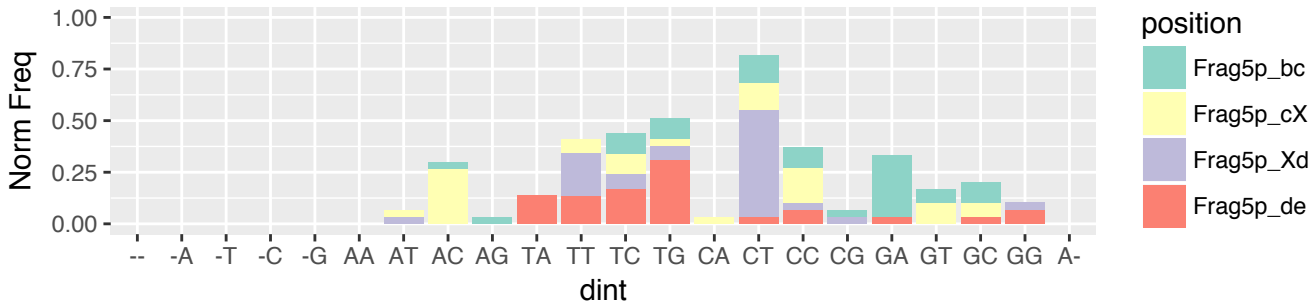

KIRC (n=907)  
 i-tRF & exclusive (n=162)  
 5' terminus relative to 5' stem of A-loop (n=29)

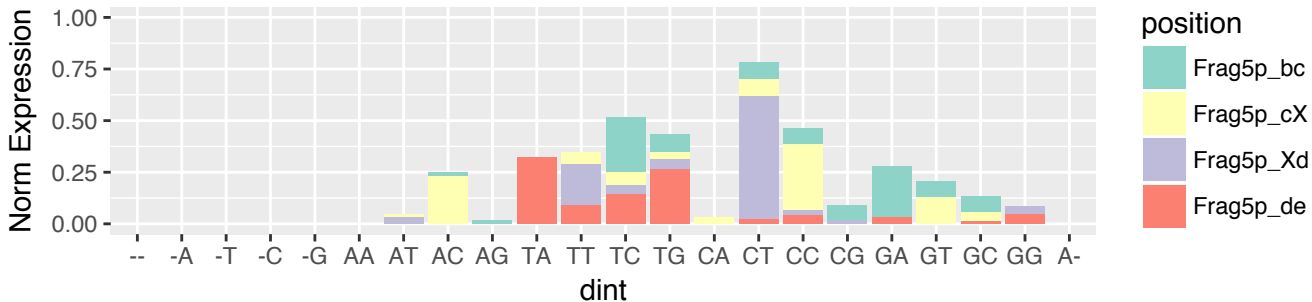

KIRC (n=907)  
 i-tRF & exclusive (n=162)  
 5' terminus relative to 3' stem of A-loop (n=41)

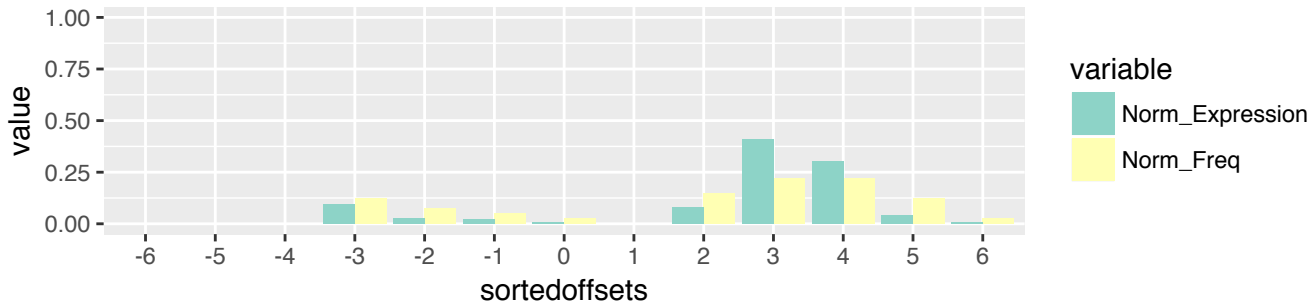

KIRC (n=907)  
 i-tRF & exclusive (n=162)  
 5' terminus relative to 3' stem of A-loop (n=41)

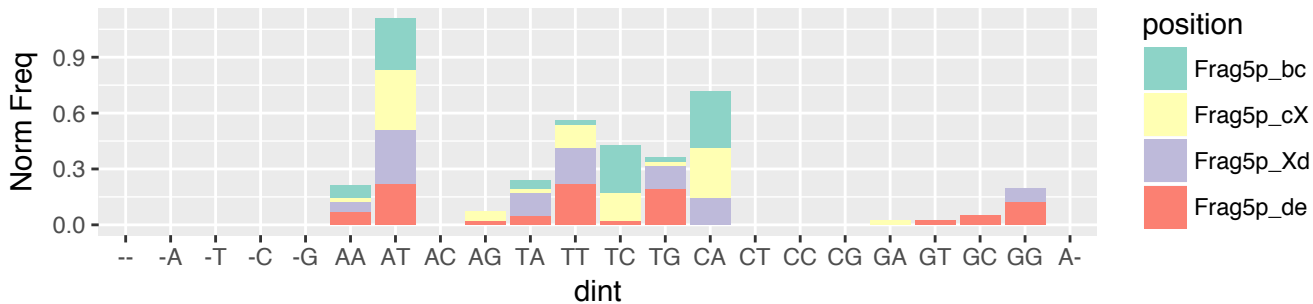

KIRC (n=907)  
 i-tRF & exclusive (n=162)  
 5' terminus relative to 3' stem of A-loop (n=41)

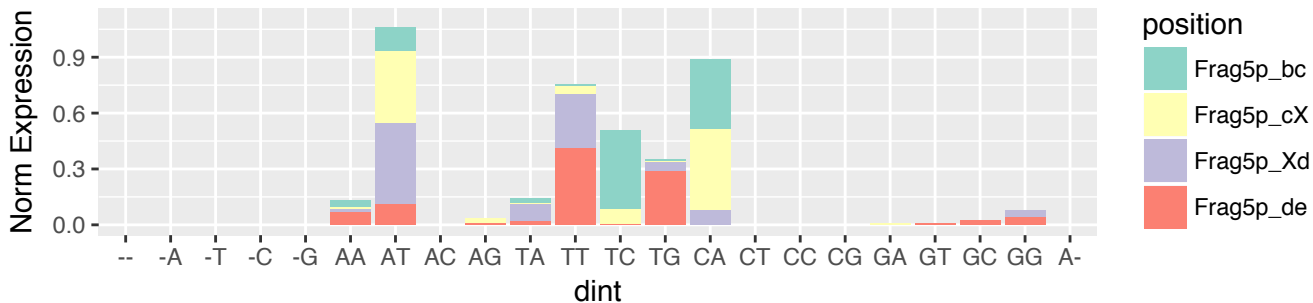

KIRC (n=907)  
 i-tRF & exclusive (n=162)  
 5' terminus relative to 5' stem of T-loop (n=9)

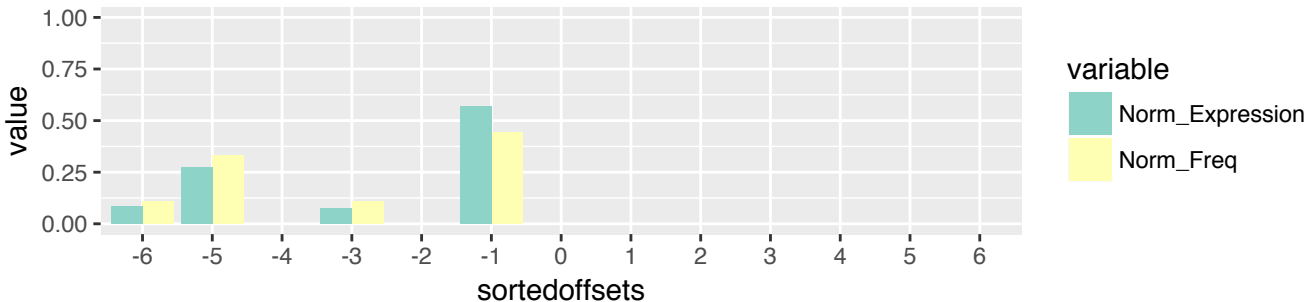

KIRC (n=907)  
 i-tRF & exclusive (n=162)  
 5' terminus relative to 5' stem of T-loop (n=9)

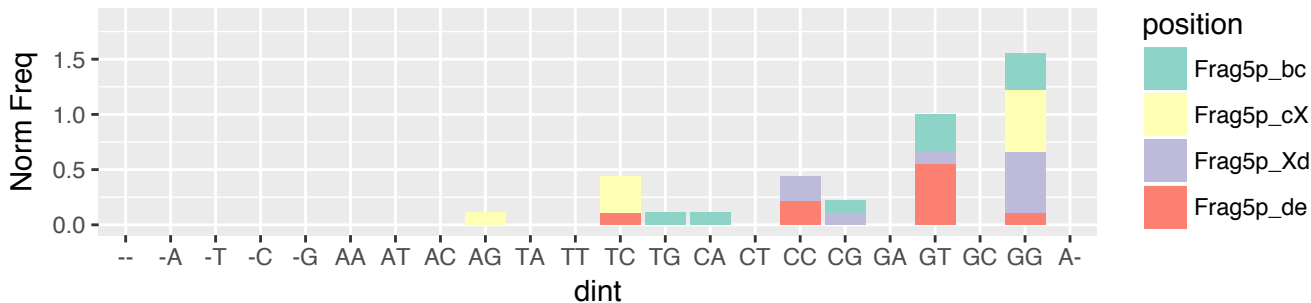

KIRC (n=907)  
 i-tRF & exclusive (n=162)  
 5' terminus relative to 5' stem of T-loop (n=9)

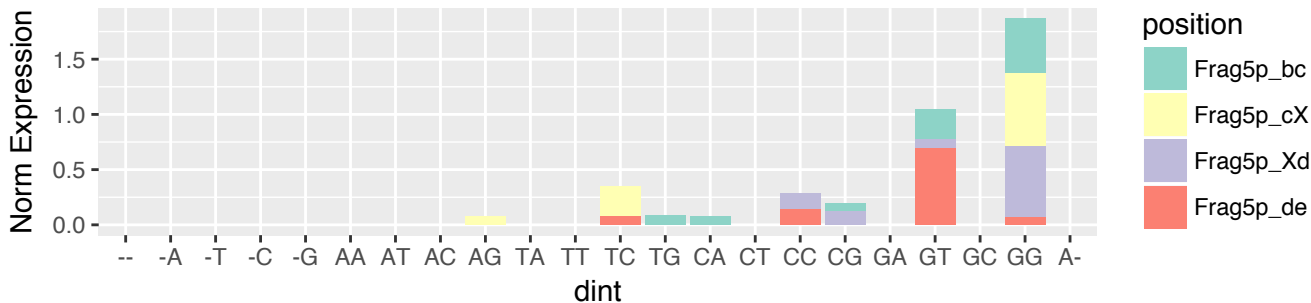



KIRC (n=907)  
 i-tRF & exclusive (n=162)  
 3' terminus relative to 3' stem of D-loop (n=5)

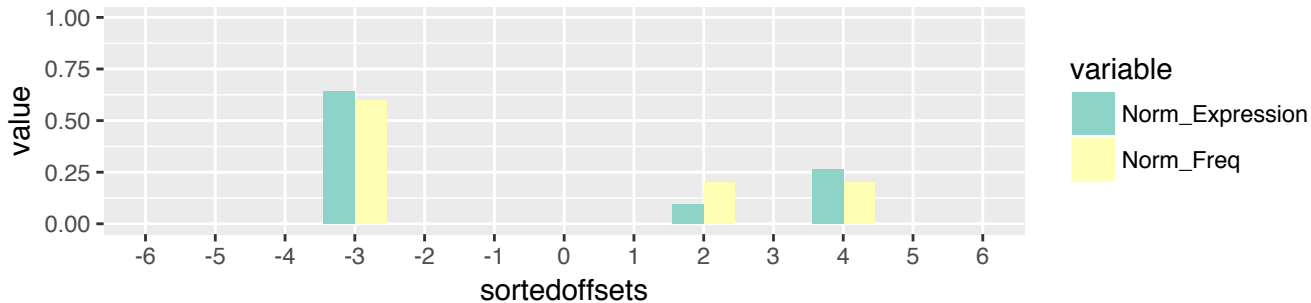

KIRC (n=907)  
 i-tRF & exclusive (n=162)  
 3' terminus relative to 3' stem of D-loop (n=5)

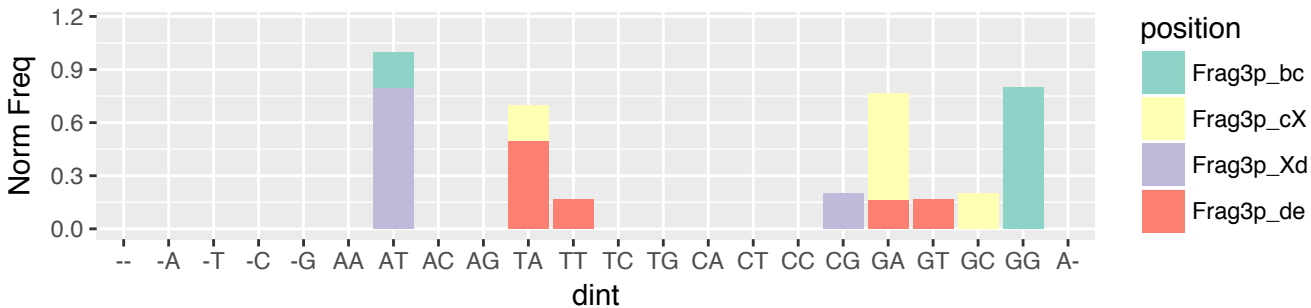

KIRC (n=907)  
 i-tRF & exclusive (n=162)  
 3' terminus relative to 3' stem of D-loop (n=5)

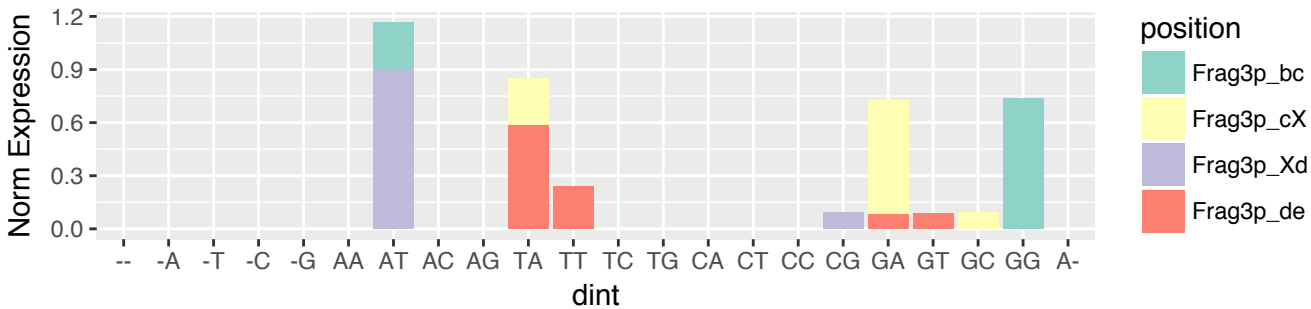

KIRC (n=907)  
i-tRF & exclusive (n=162)  
3' terminus relative to 5' stem of A-loop (n=61)

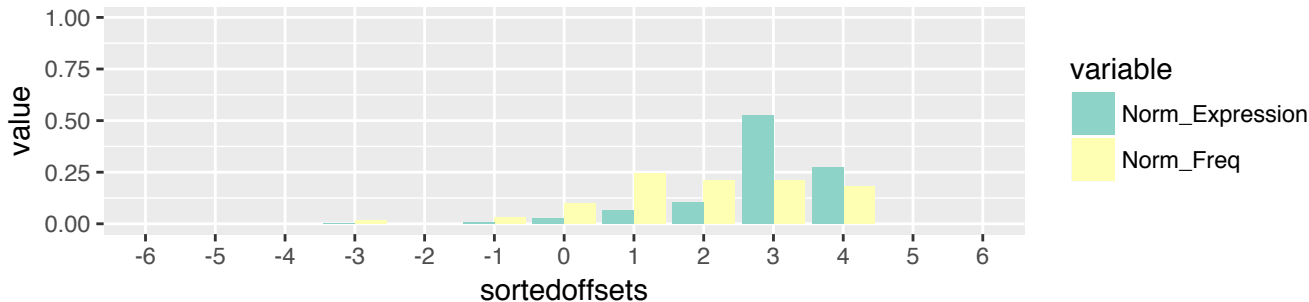

KIRC (n=907)  
i-tRF & exclusive (n=162)  
3' terminus relative to 5' stem of A-loop (n=61)

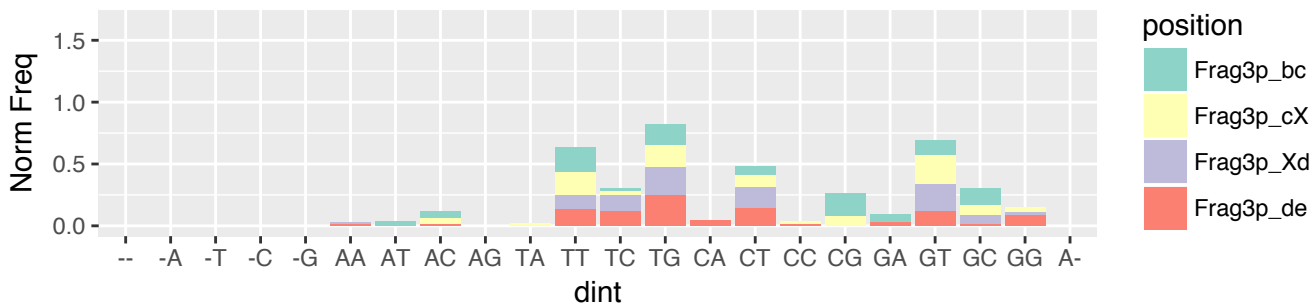

KIRC (n=907)  
i-tRF & exclusive (n=162)  
3' terminus relative to 5' stem of A-loop (n=61)

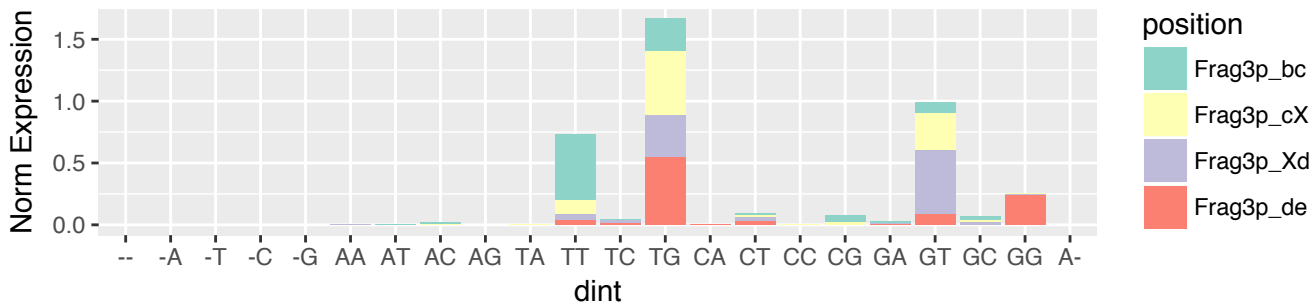

KIRC (n=907)  
i-tRF & exclusive (n=162)  
3' terminus relative to 3' stem of A-loop (n=18)

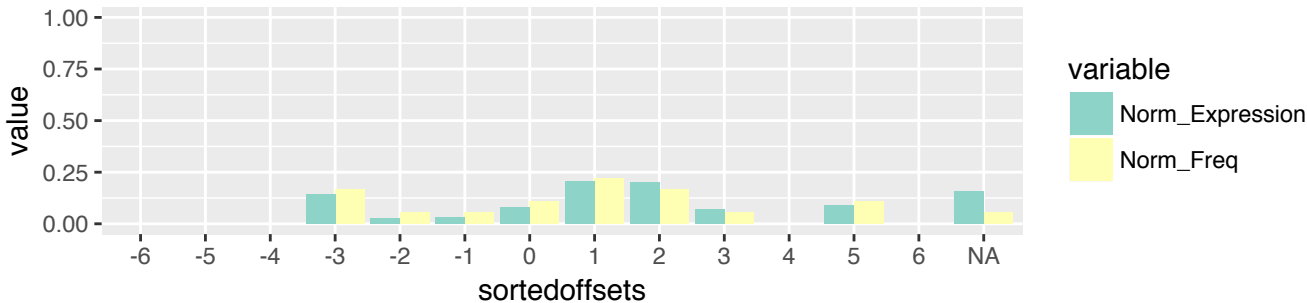

KIRC (n=907)  
i-tRF & exclusive (n=162)  
3' terminus relative to 3' stem of A-loop (n=18)

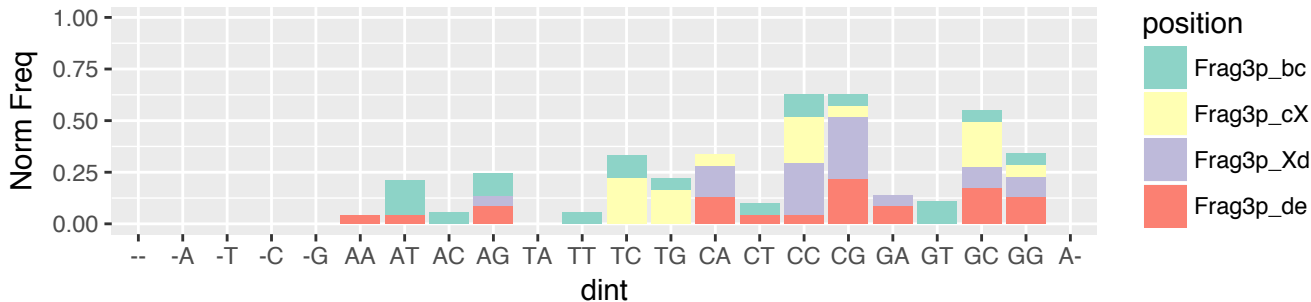

KIRC (n=907)  
i-tRF & exclusive (n=162)  
3' terminus relative to 3' stem of A-loop (n=18)

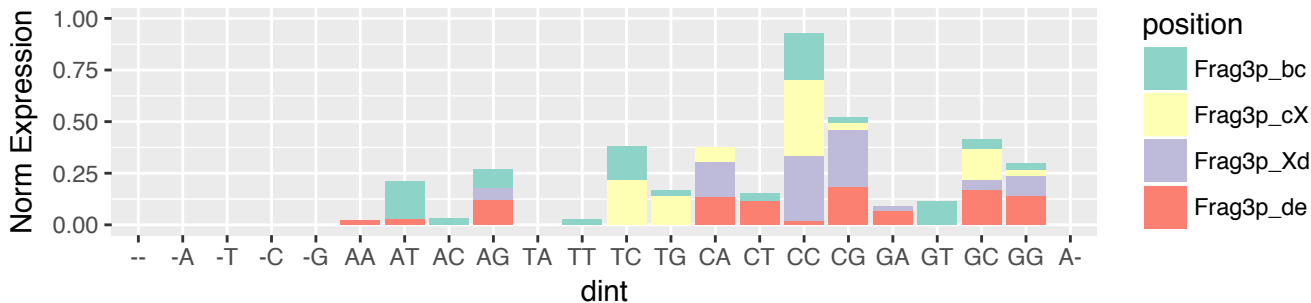

KIRC (n=907)  
i-tRF & exclusive (n=162)  
3' terminus relative to 5' stem of T-loop (n=31)

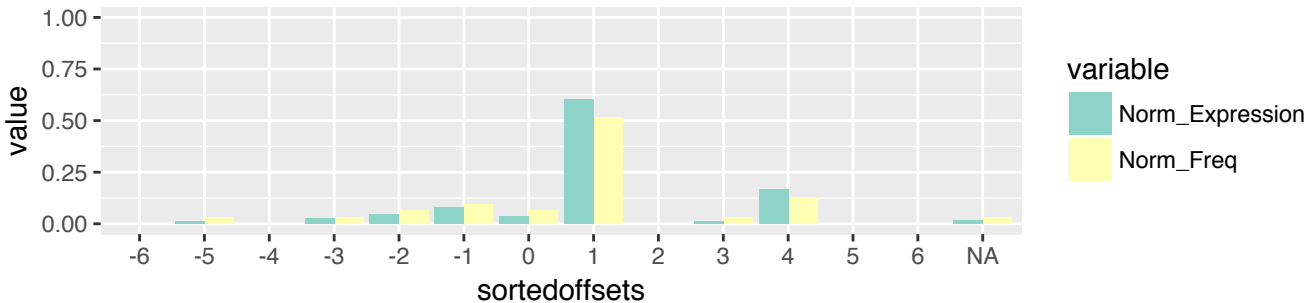

KIRC (n=907)  
i-tRF & exclusive (n=162)  
3' terminus relative to 5' stem of T-loop (n=31)

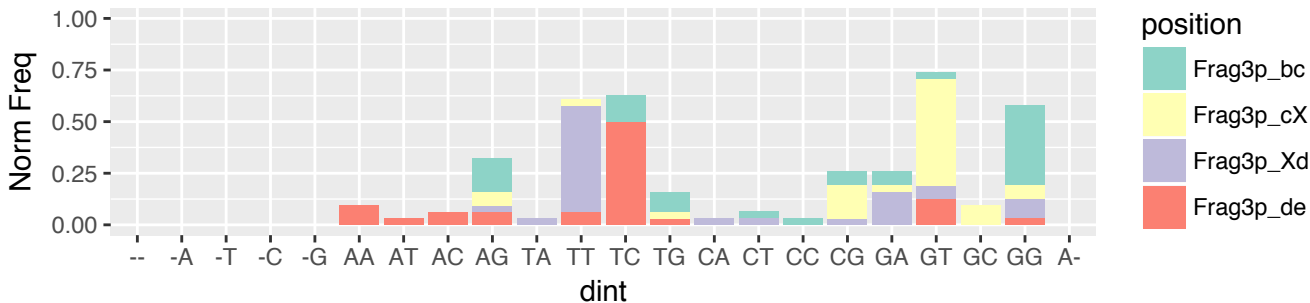

KIRC (n=907)  
i-tRF & exclusive (n=162)  
3' terminus relative to 5' stem of T-loop (n=31)

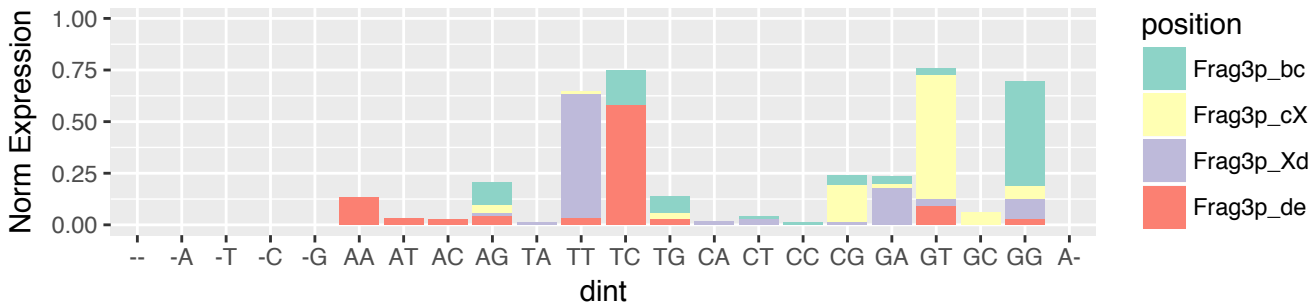

KIRC (n=907)  
 i-tRF & exclusive (n=162)  
 3' terminus relative to 3' stem of T-loop (n=33)

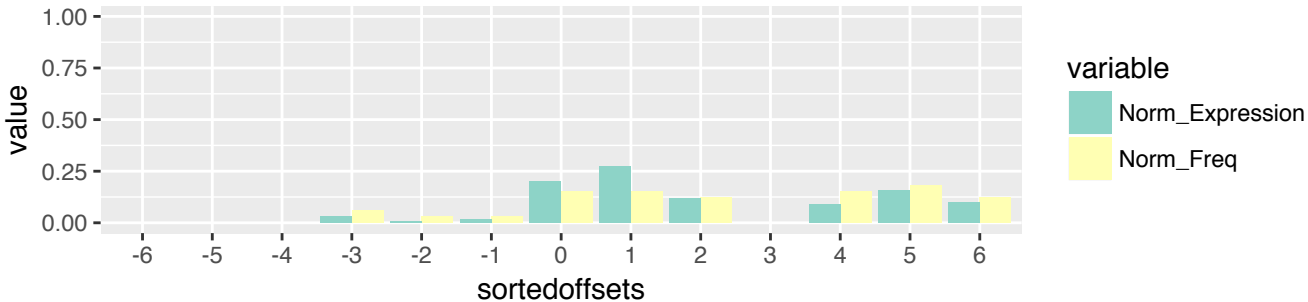

KIRC (n=907)  
 i-tRF & exclusive (n=162)  
 3' terminus relative to 3' stem of T-loop (n=33)

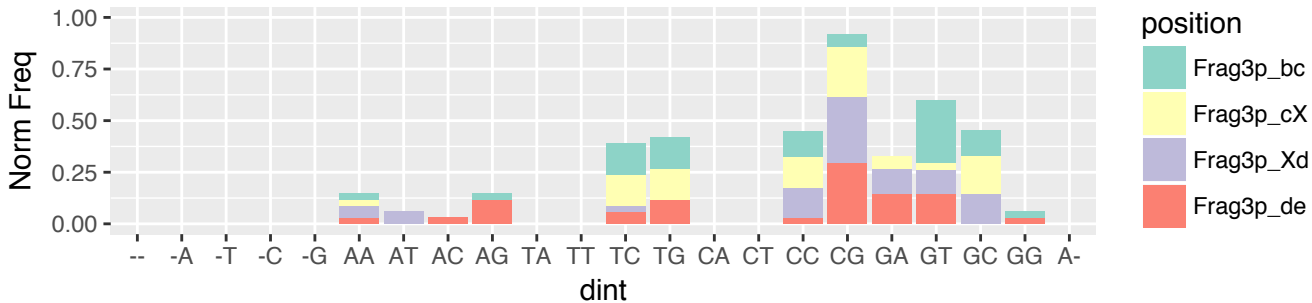

KIRC (n=907)  
 i-tRF & exclusive (n=162)  
 3' terminus relative to 3' stem of T-loop (n=33)

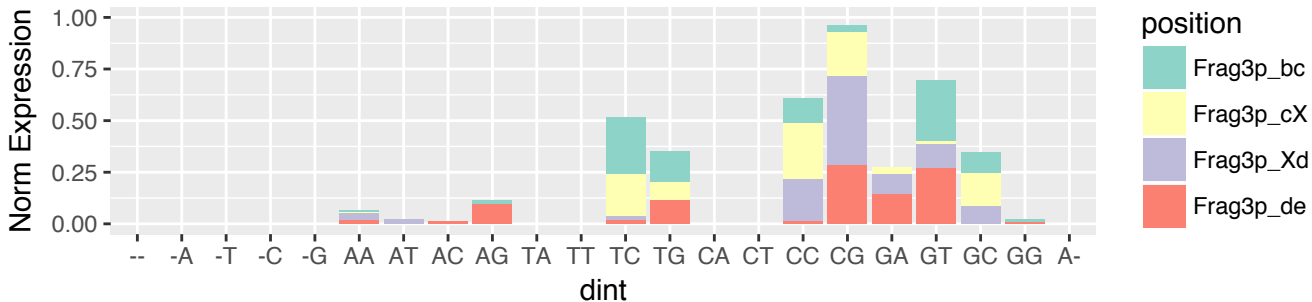

KIRC (n=907)  
i-tRF & exclusive (n=162)  
3' terminus relative to 3' end of the tRNA (n=14)

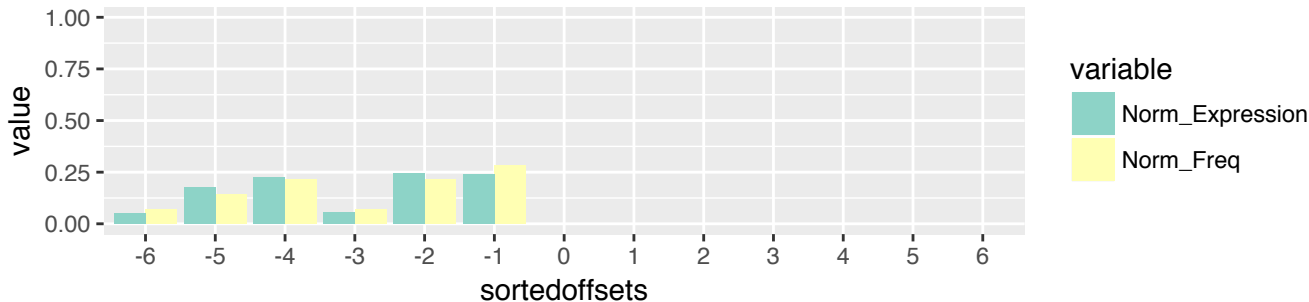

KIRC (n=907)  
i-tRF & exclusive (n=162)  
3' terminus relative to 3' end of the tRNA (n=14)

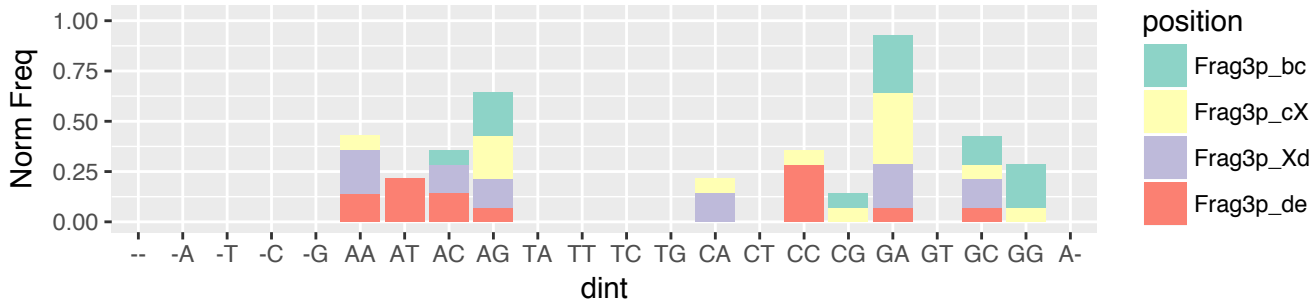

KIRC (n=907)  
i-tRF & exclusive (n=162)  
3' terminus relative to 3' end of the tRNA (n=14)

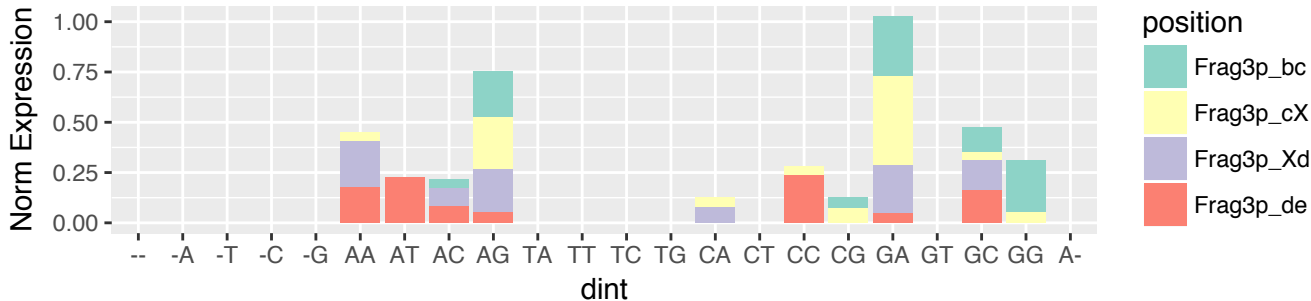

KIRC (n=907)  
 3'-tRF & exclusive (n=178)  
 5' terminus relative to 5' stem of T-loop (n=124)

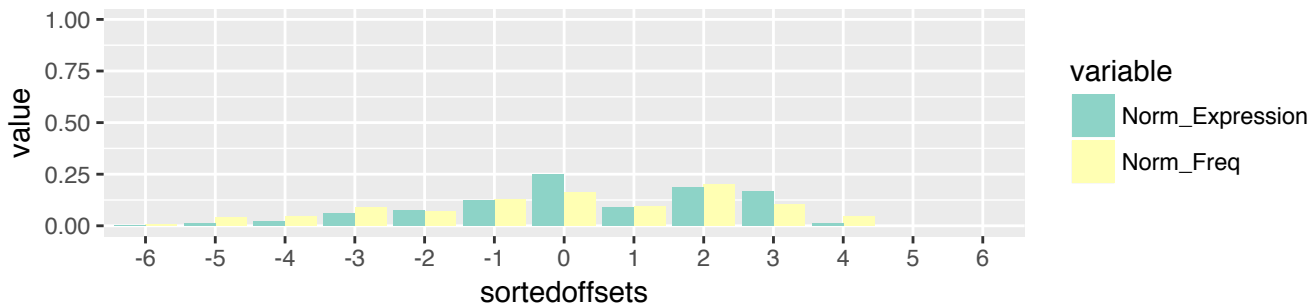

KIRC (n=907)  
 3'-tRF & exclusive (n=178)  
 5' terminus relative to 5' stem of T-loop (n=124)

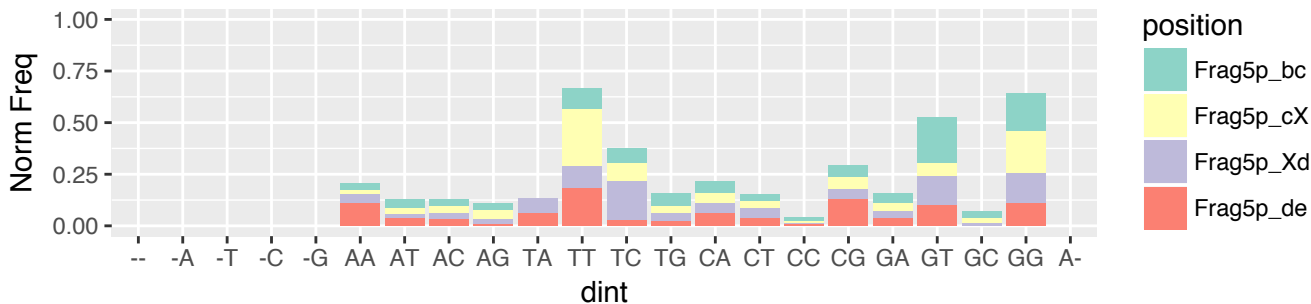

KIRC (n=907)  
 3'-tRF & exclusive (n=178)  
 5' terminus relative to 5' stem of T-loop (n=124)

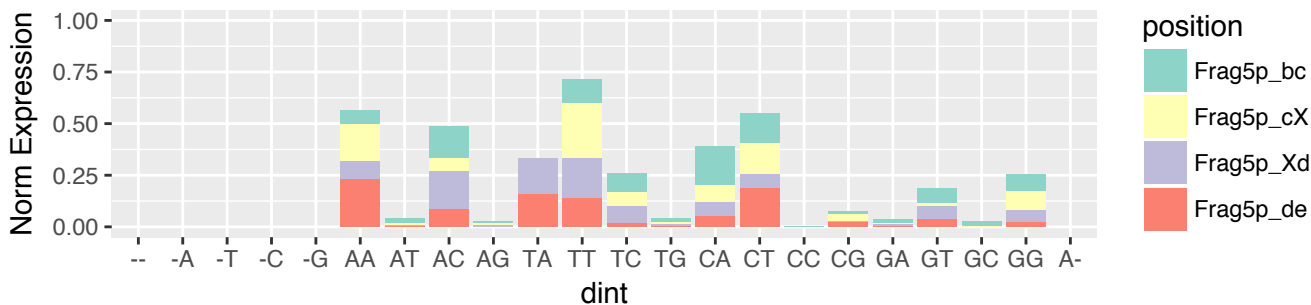

KIRC (n=907)  
 3'-tRF & exclusive (n=178)  
 5' terminus relative to 3' stem of T-loop (n=54)

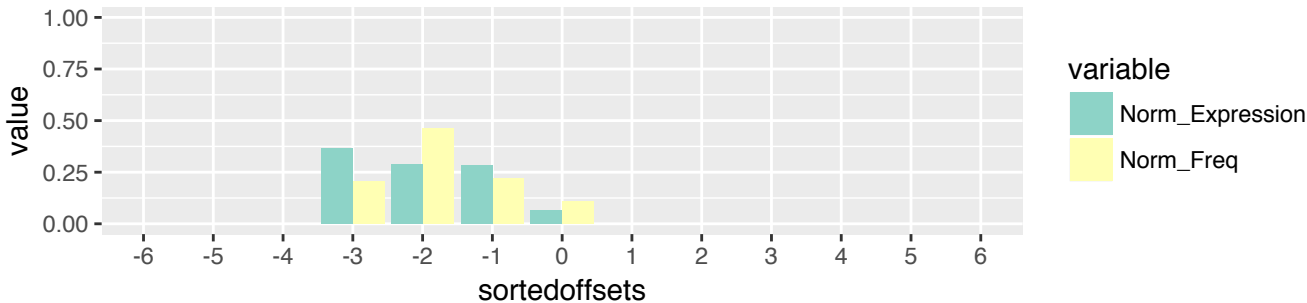

KIRC (n=907)  
 3'-tRF & exclusive (n=178)  
 5' terminus relative to 3' stem of T-loop (n=54)

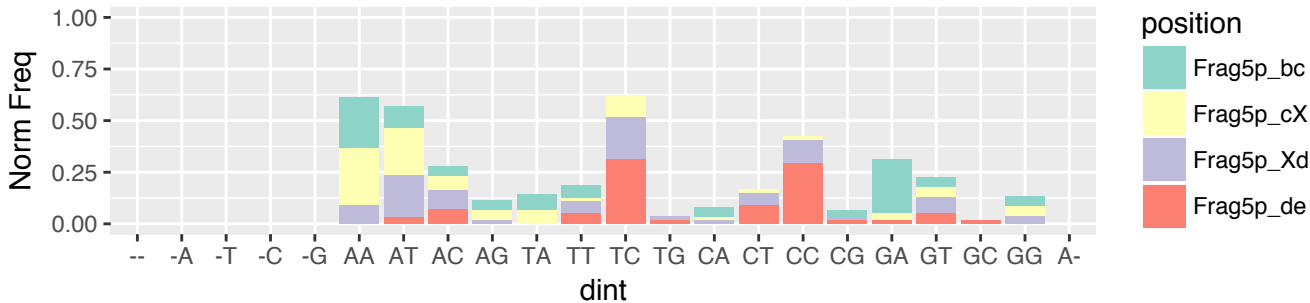

KIRC (n=907)  
 3'-tRF & exclusive (n=178)  
 5' terminus relative to 3' stem of T-loop (n=54)

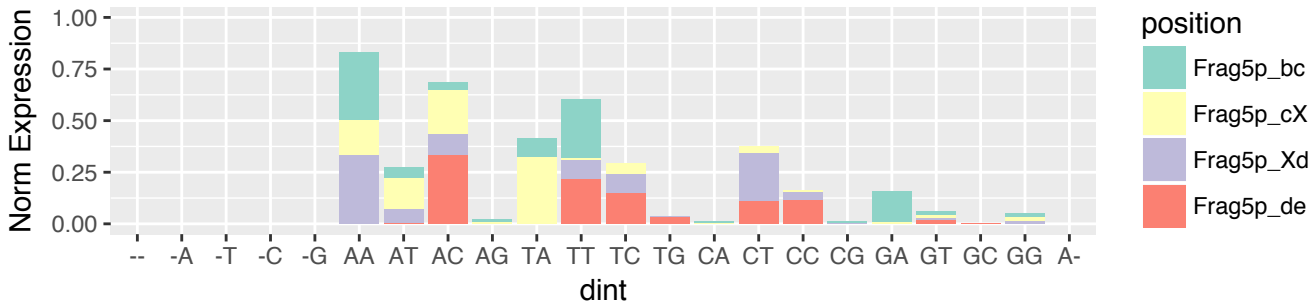



KIRC (n=907)  
 3'-tRF & exclusive (n=178)  
 3' terminus relative to 3' end of the tRNA (n=178)

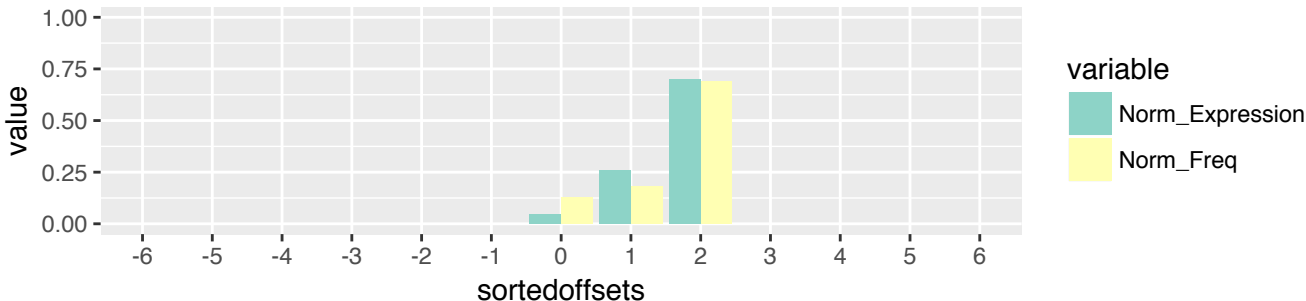

KIRC (n=907)  
 3'-tRF & exclusive (n=178)  
 3' terminus relative to 3' end of the tRNA (n=178)

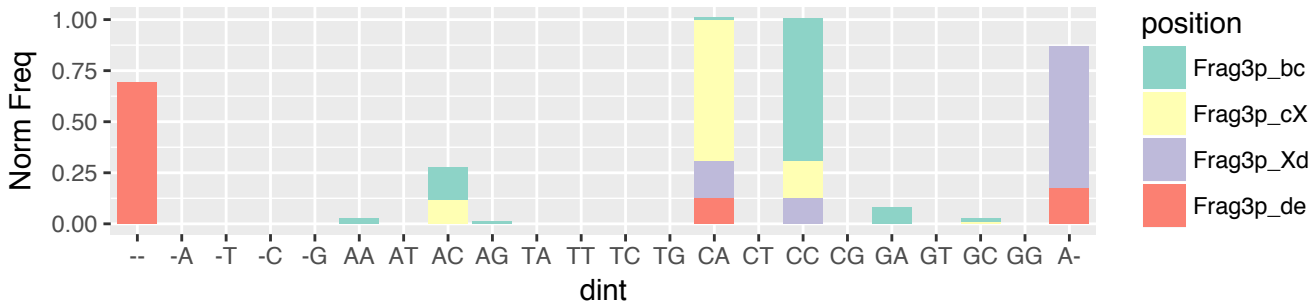

KIRC (n=907)  
 3'-tRF & exclusive (n=178)  
 3' terminus relative to 3' end of the tRNA (n=178)

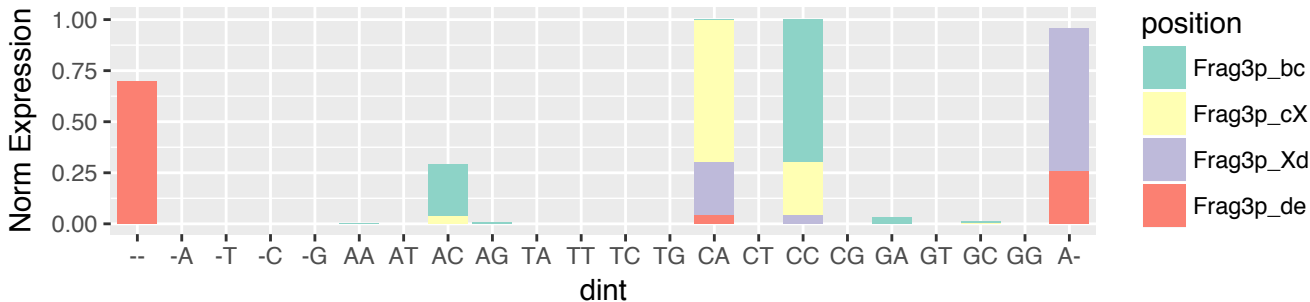

KIRP (n=696)  
 5'-half & exclusive (n=5)  
 5' terminus relative to 5' end of the tRNA (n=5)



KIRP (n=696)  
 5'-half & exclusive (n=5)  
 5' terminus relative to 5' end of the tRNA (n=5)

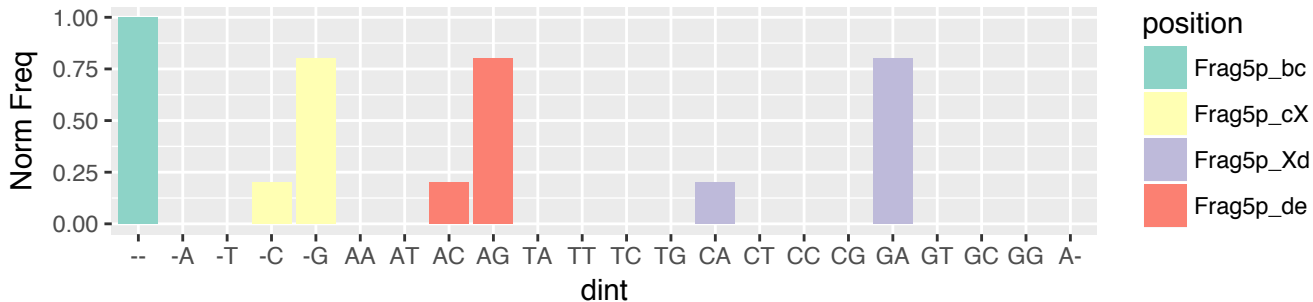

KIRP (n=696)  
 5'-half & exclusive (n=5)  
 5' terminus relative to 5' end of the tRNA (n=5)

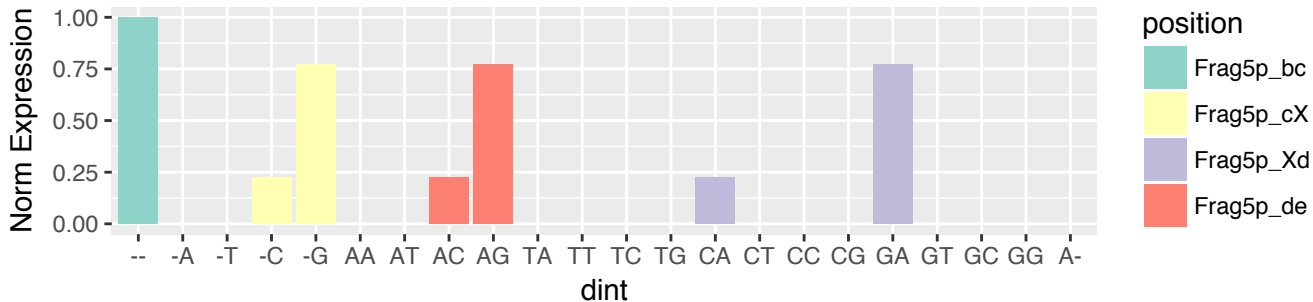

KIRP (n=696)  
 5'-half & exclusive (n=5)  
 3' terminus relative to 5' stem of A-loop (n=5)

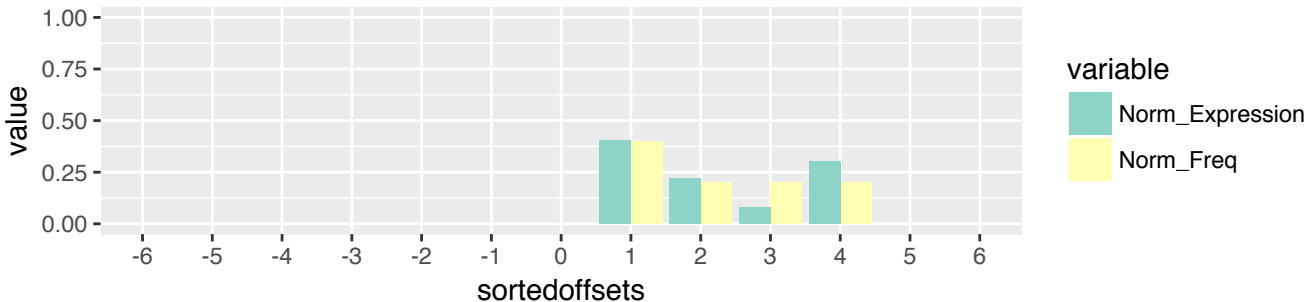

KIRP (n=696)  
 5'-half & exclusive (n=5)  
 3' terminus relative to 5' stem of A-loop (n=5)



KIRP (n=696)  
 5'-half & exclusive (n=5)  
 3' terminus relative to 5' stem of A-loop (n=5)

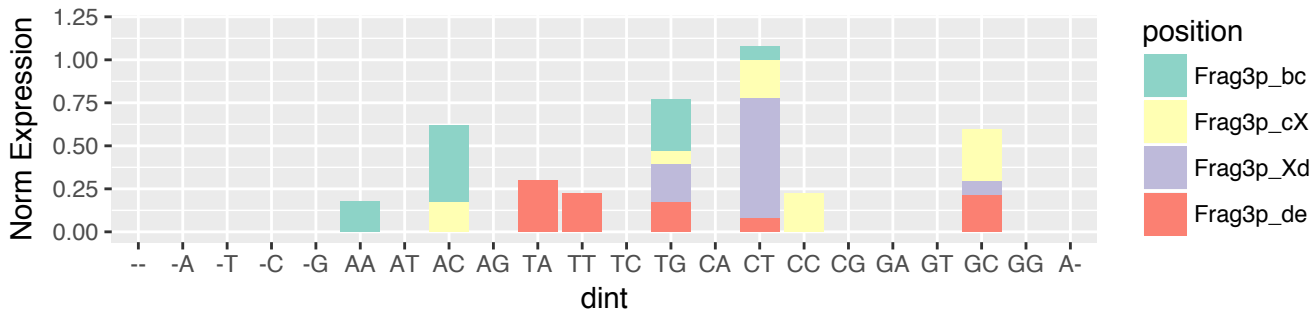

KIRP (n=696)  
 5'-tRF & exclusive (n=120)  
 5' terminus relative to 5' end of the tRNA (n=120)

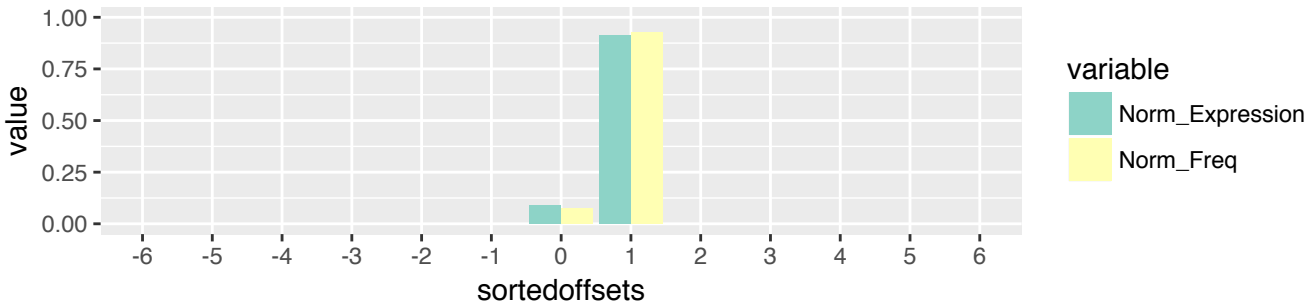

KIRP (n=696)  
 5'-tRF & exclusive (n=120)  
 5' terminus relative to 5' end of the tRNA (n=120)

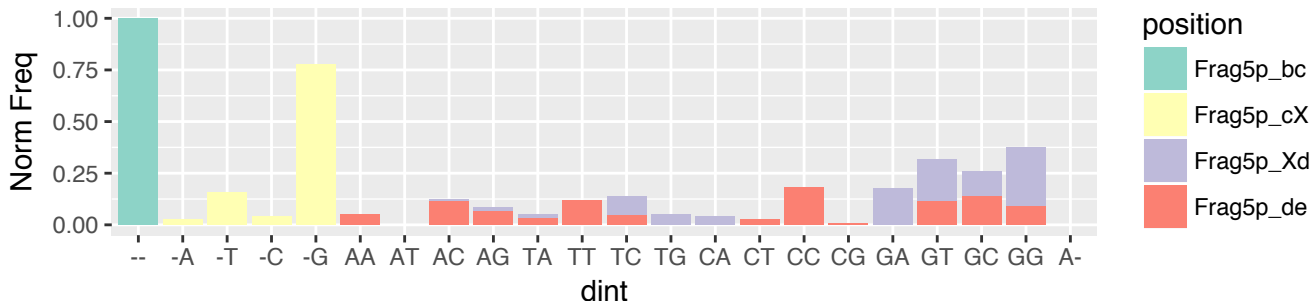

KIRP (n=696)  
 5'-tRF & exclusive (n=120)  
 5' terminus relative to 5' end of the tRNA (n=120)

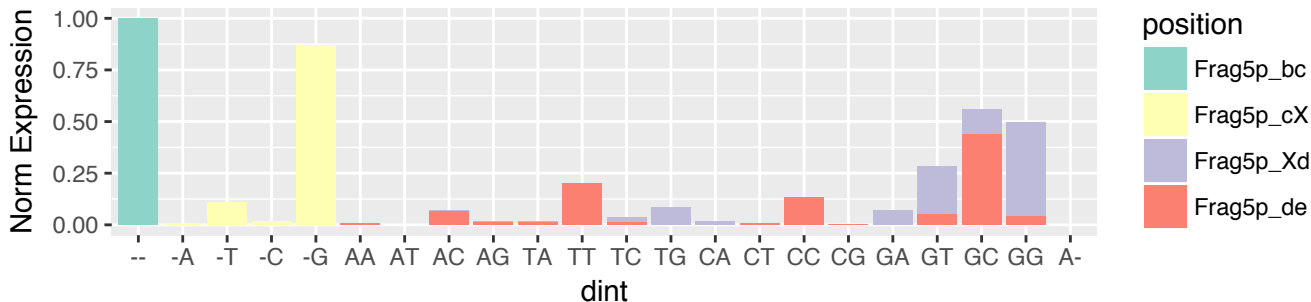

KIRP (n=696)  
 5'-tRF & exclusive (n=120)  
 3' terminus relative to 5' stem of D-loop (n=4)

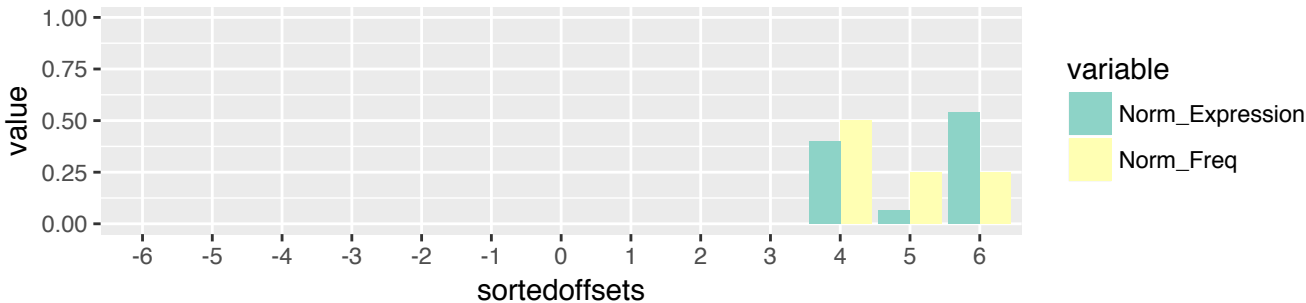

KIRP (n=696)  
 5'-tRF & exclusive (n=120)  
 3' terminus relative to 5' stem of D-loop (n=4)

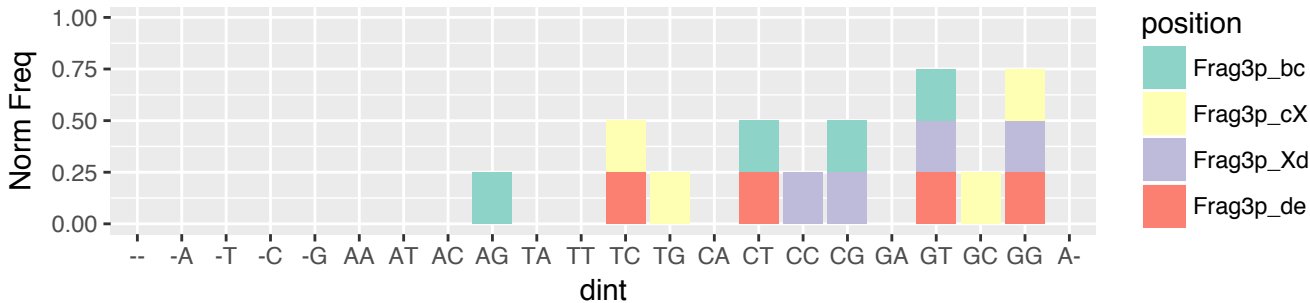

KIRP (n=696)  
 5'-tRF & exclusive (n=120)  
 3' terminus relative to 5' stem of D-loop (n=4)

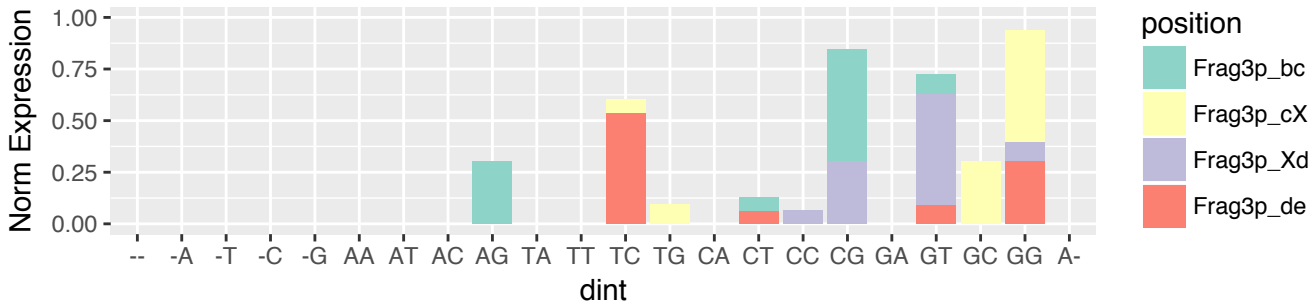

KIRP (n=696)  
 5'-tRF & exclusive (n=120)  
 3' terminus relative to 3' stem of D-loop (n=103)

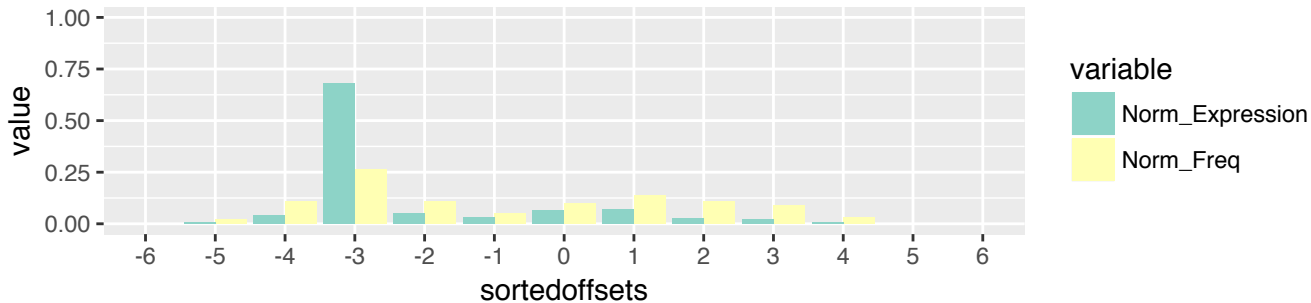

KIRP (n=696)  
 5'-tRF & exclusive (n=120)  
 3' terminus relative to 3' stem of D-loop (n=103)

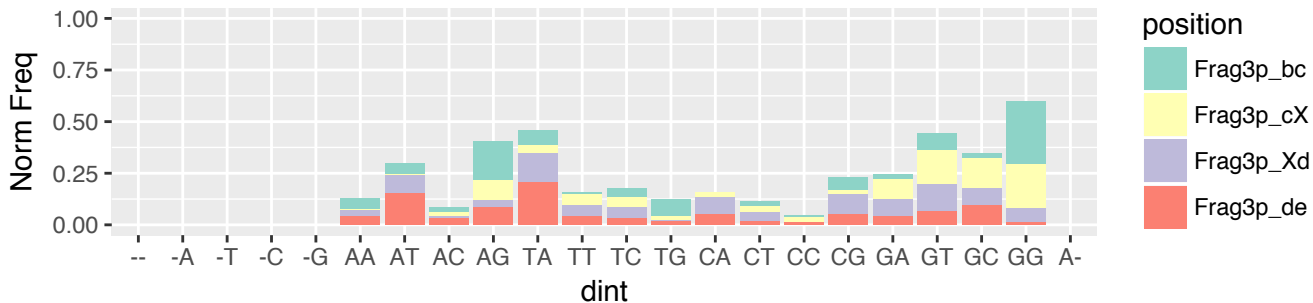

KIRP (n=696)  
 5'-tRF & exclusive (n=120)  
 3' terminus relative to 3' stem of D-loop (n=103)

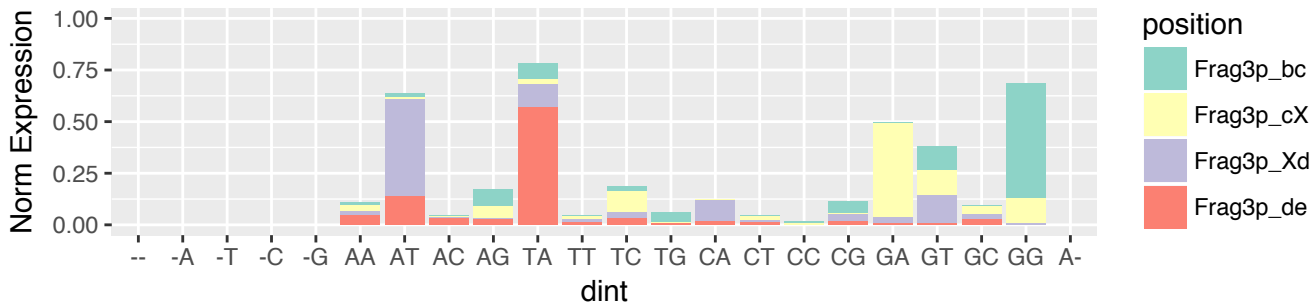

KIRP (n=696)  
 5'-tRF & exclusive (n=120)  
 3' terminus relative to 5' stem of A-loop (n=7)

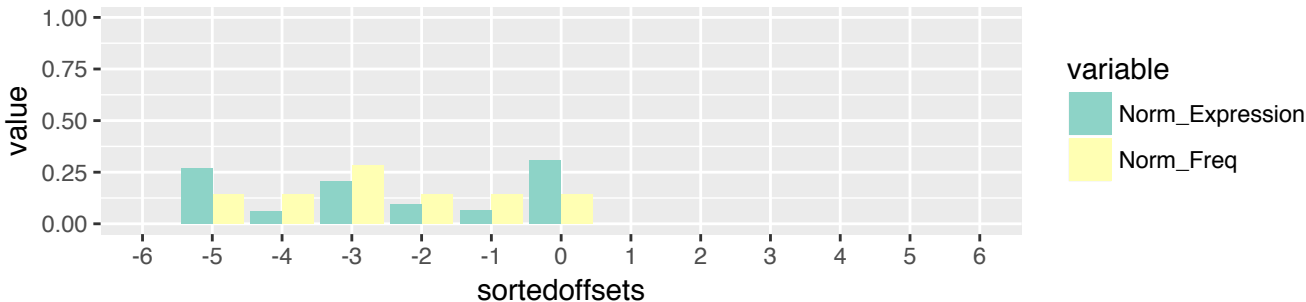

KIRP (n=696)  
 5'-tRF & exclusive (n=120)  
 3' terminus relative to 5' stem of A-loop (n=7)

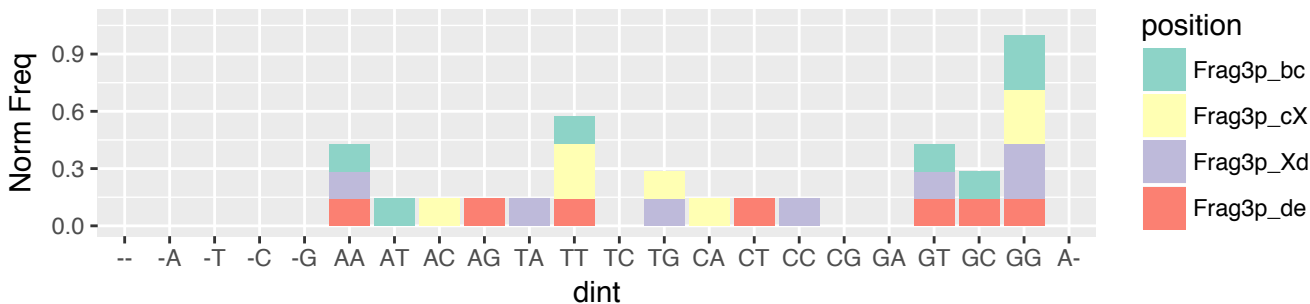

KIRP (n=696)  
 5'-tRF & exclusive (n=120)  
 3' terminus relative to 5' stem of A-loop (n=7)

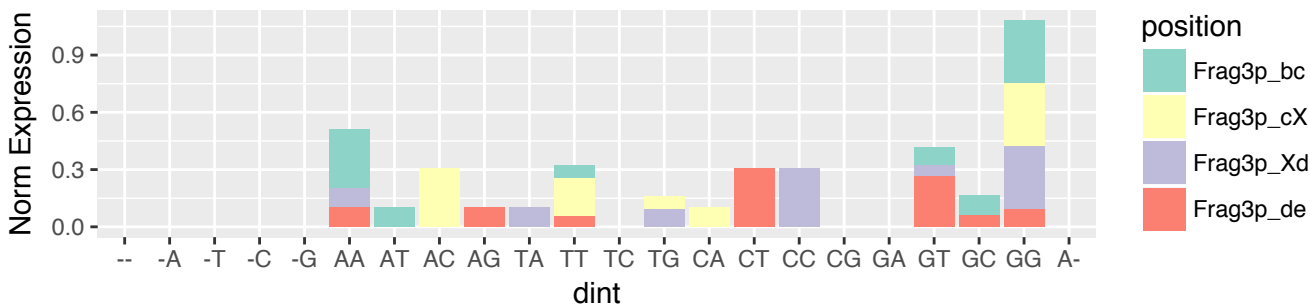

KIRP (n=696)  
 5'-tRF & exclusive (n=120)  
 3' terminus relative to 3' stem of A-loop (n=6)

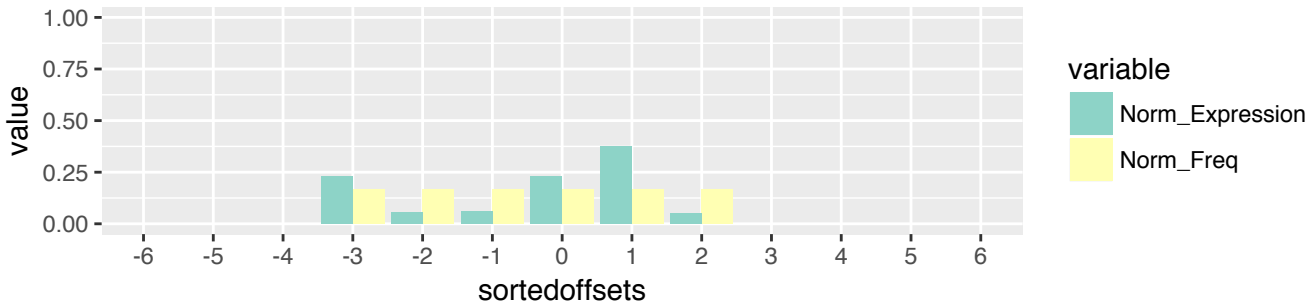

KIRP (n=696)  
 5'-tRF & exclusive (n=120)  
 3' terminus relative to 3' stem of A-loop (n=6)

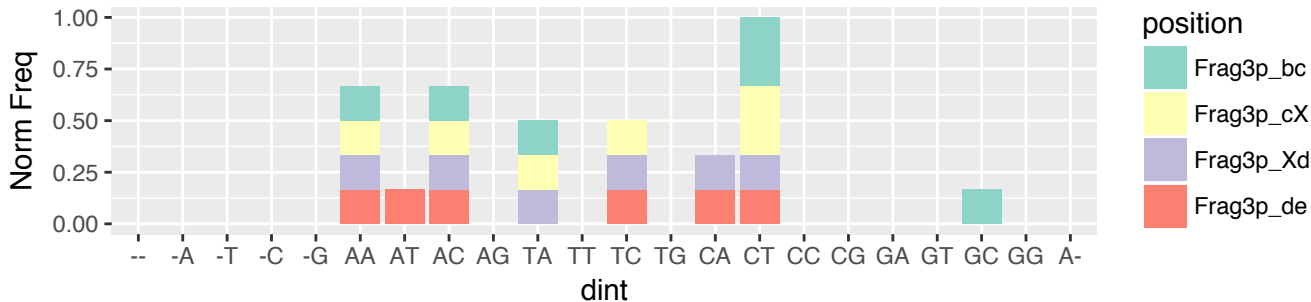

KIRP (n=696)  
 5'-tRF & exclusive (n=120)  
 3' terminus relative to 3' stem of A-loop (n=6)

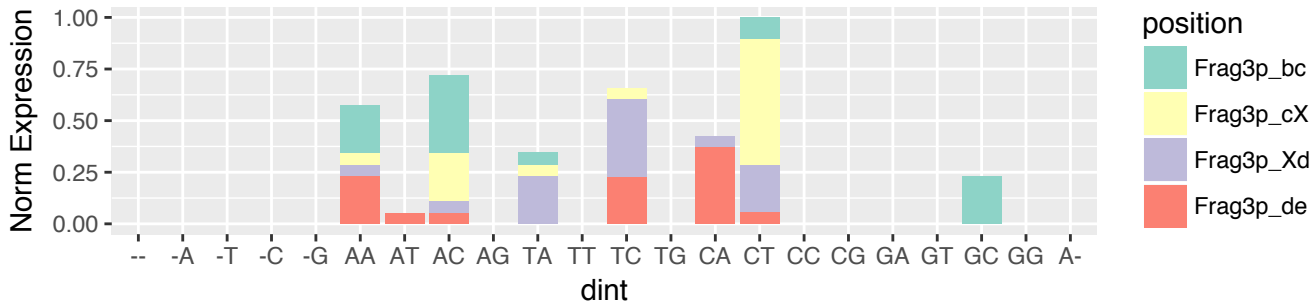



KIRP (n=696)  
 i-tRF & exclusive (n=112)  
 5' terminus relative to 5' end of the tRNA (n=3)

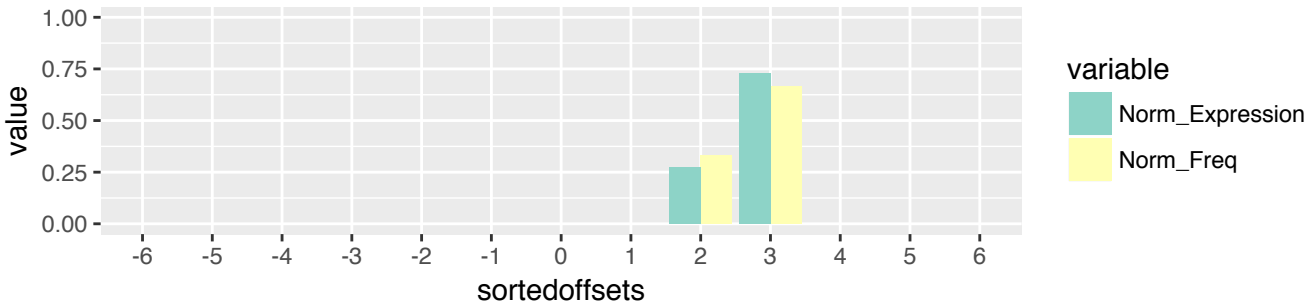

KIRP (n=696)  
 i-tRF & exclusive (n=112)  
 5' terminus relative to 5' end of the tRNA (n=3)

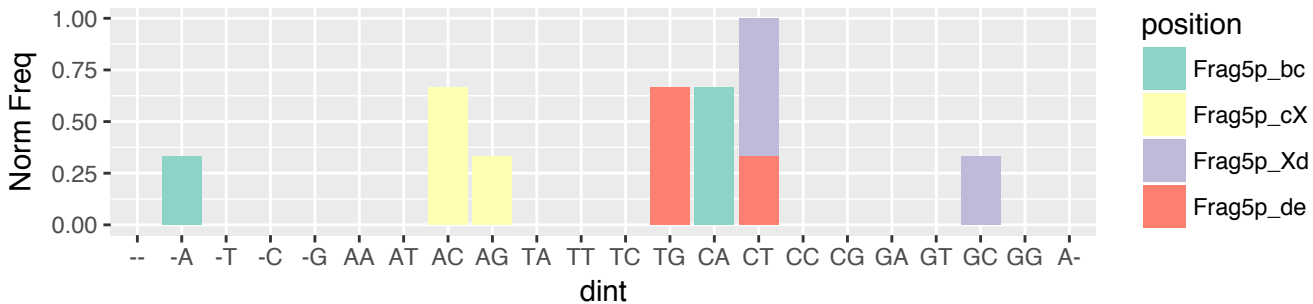

KIRP (n=696)  
 i-tRF & exclusive (n=112)  
 5' terminus relative to 5' end of the tRNA (n=3)

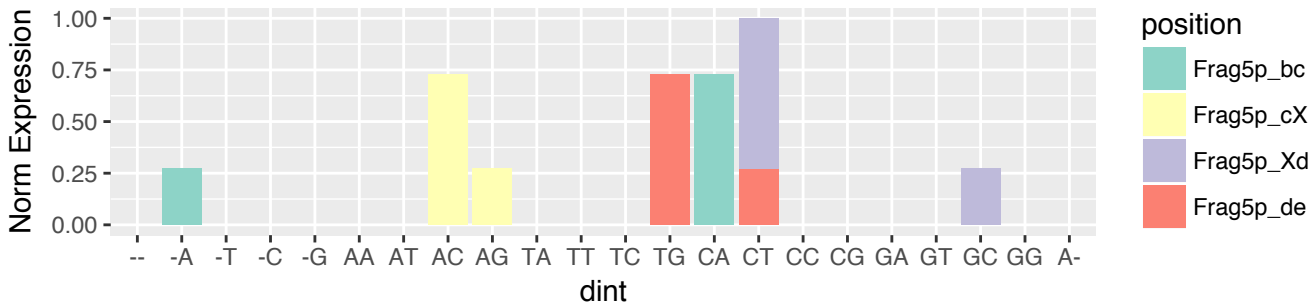

KIRP (n=696)  
 i-tRF & exclusive (n=112)  
 5' terminus relative to 5' stem of D-loop (n=39)

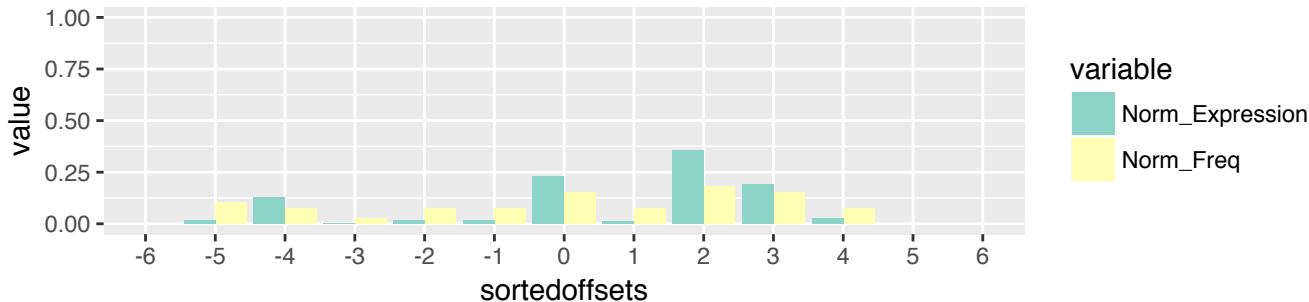

KIRP (n=696)  
 i-tRF & exclusive (n=112)  
 5' terminus relative to 5' stem of D-loop (n=39)

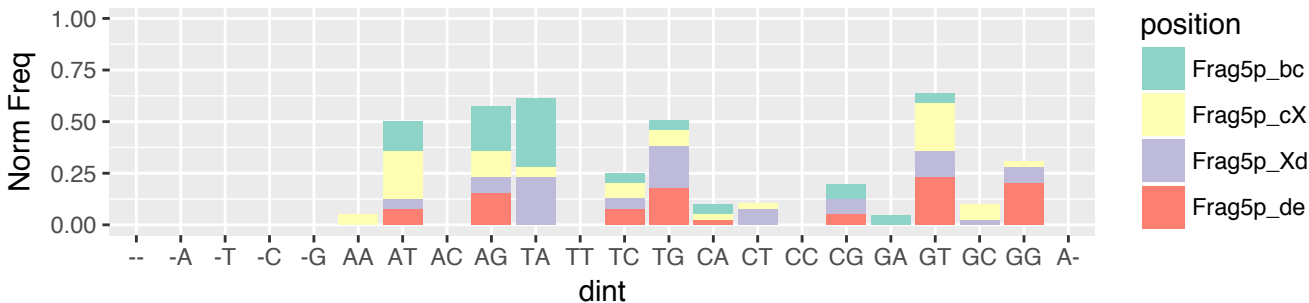

KIRP (n=696)  
 i-tRF & exclusive (n=112)  
 5' terminus relative to 5' stem of D-loop (n=39)

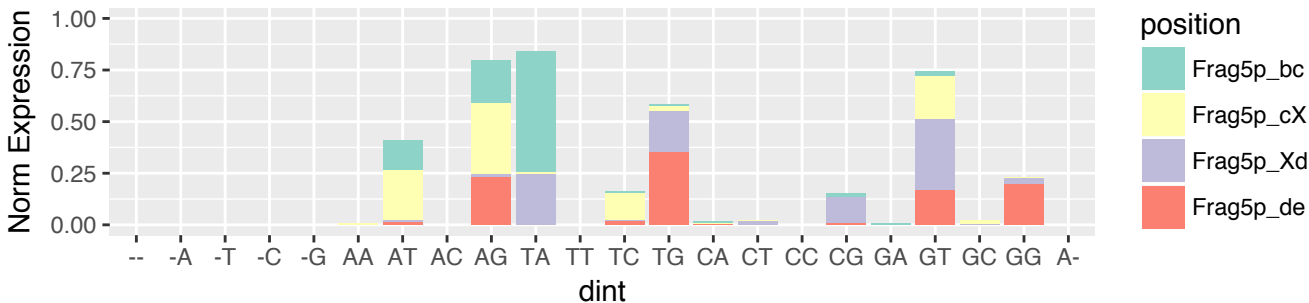

KIRP (n=696)  
i-tRF & exclusive (n=112)  
5' terminus relative to 3' stem of D-loop (n=7)

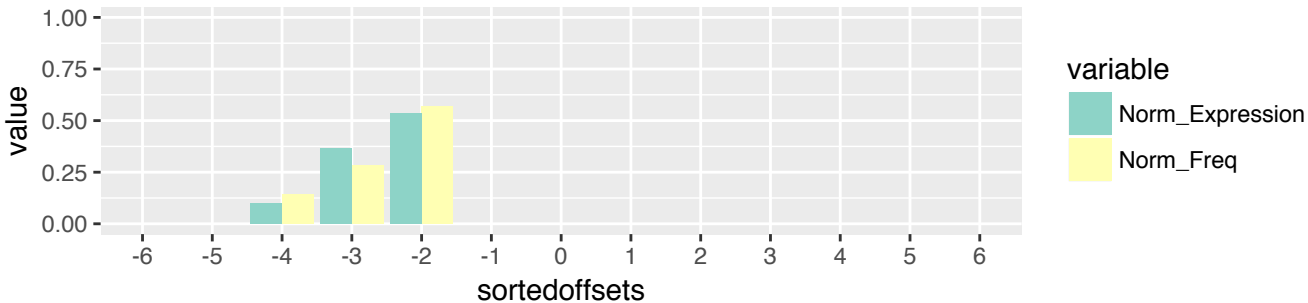

KIRP (n=696)  
i-tRF & exclusive (n=112)  
5' terminus relative to 3' stem of D-loop (n=7)

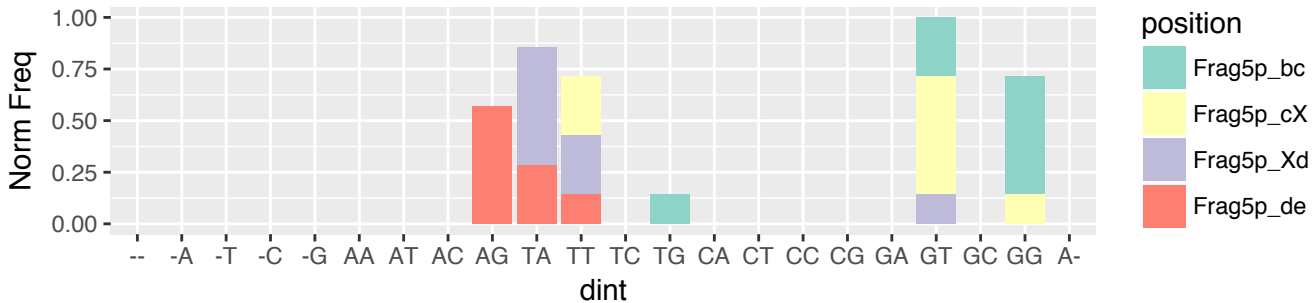

KIRP (n=696)  
i-tRF & exclusive (n=112)  
5' terminus relative to 3' stem of D-loop (n=7)

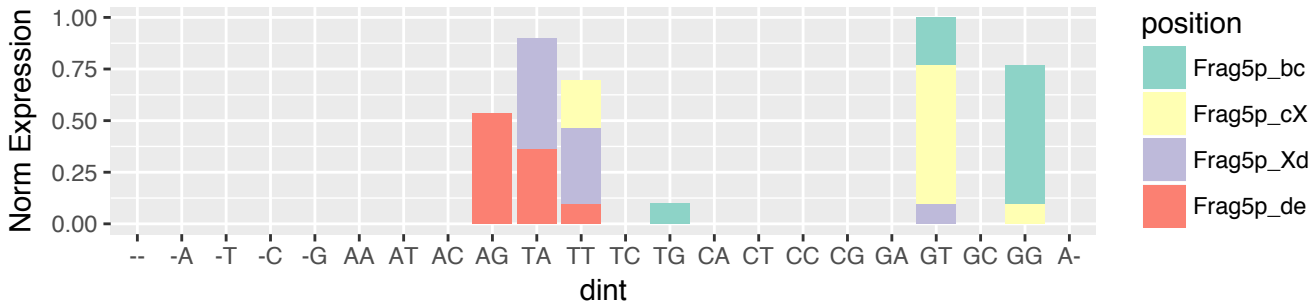

KIRP (n=696)  
 i-tRF & exclusive (n=112)  
 5' terminus relative to 5' stem of A-loop (n=12)

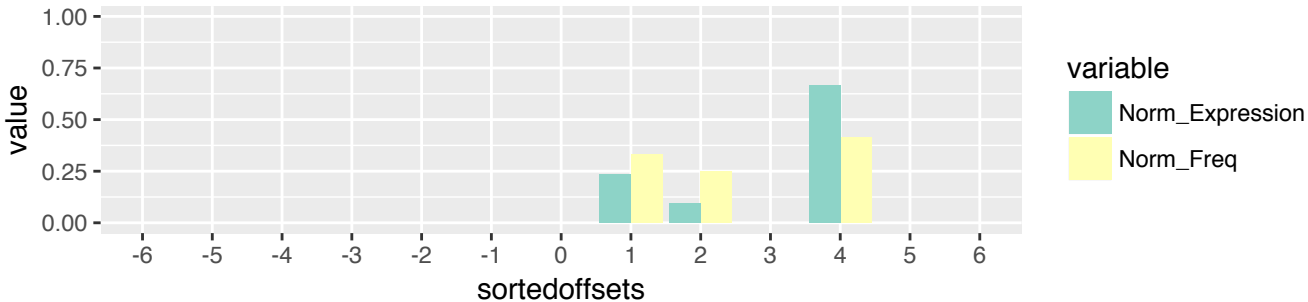

KIRP (n=696)  
 i-tRF & exclusive (n=112)  
 5' terminus relative to 5' stem of A-loop (n=12)

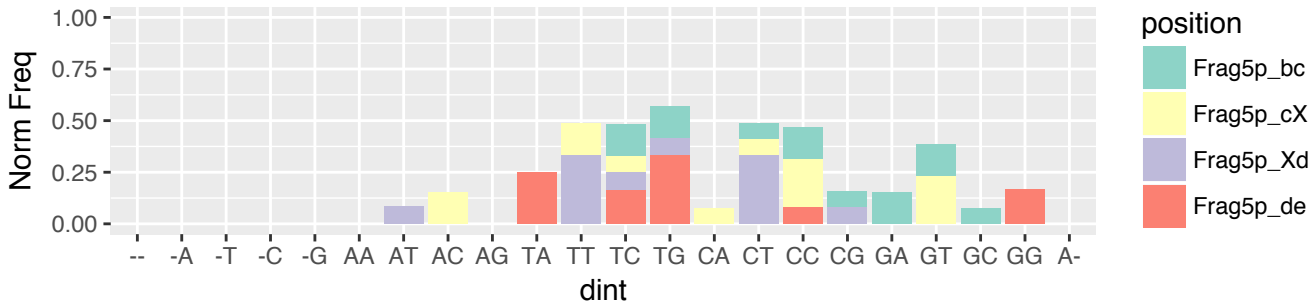

KIRP (n=696)  
 i-tRF & exclusive (n=112)  
 5' terminus relative to 5' stem of A-loop (n=12)

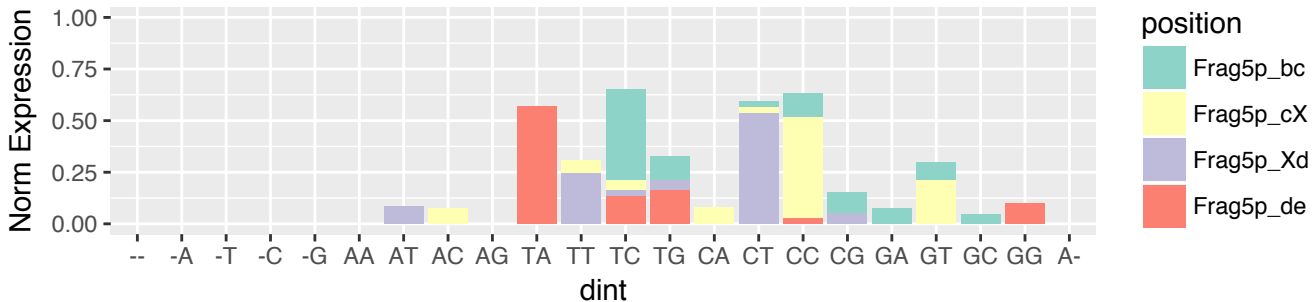

KIRP (n=696)  
i-tRF & exclusive (n=112)  
5' terminus relative to 3' stem of A-loop (n=45)

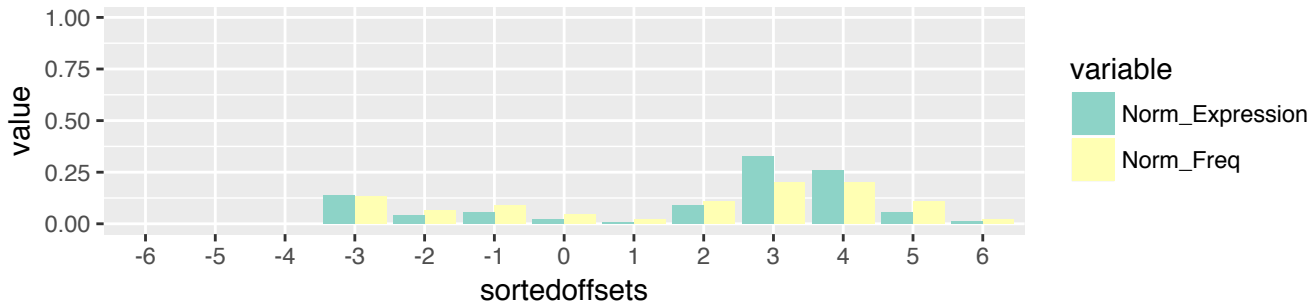

KIRP (n=696)  
i-tRF & exclusive (n=112)  
5' terminus relative to 3' stem of A-loop (n=45)

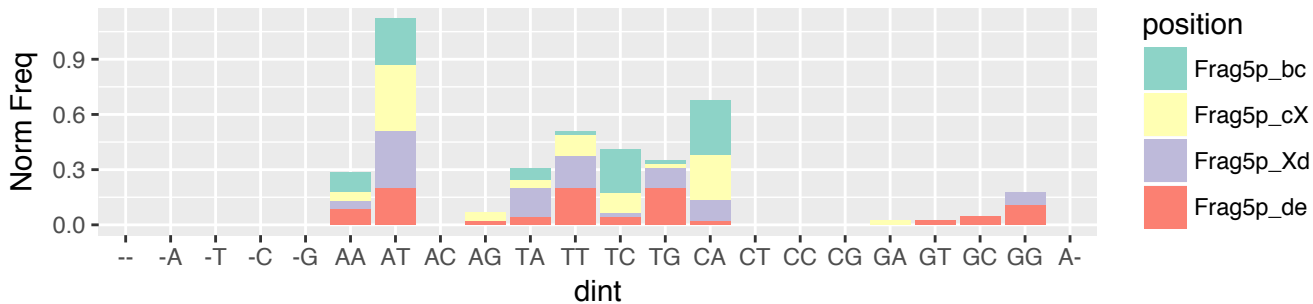

KIRP (n=696)  
i-tRF & exclusive (n=112)  
5' terminus relative to 3' stem of A-loop (n=45)

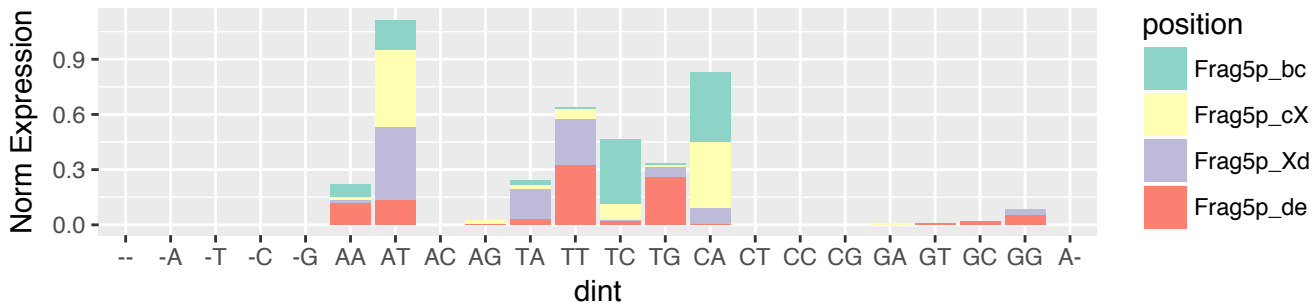

KIRP (n=696)  
 i-tRF & exclusive (n=112)  
 5' terminus relative to 5' stem of T-loop (n=6)

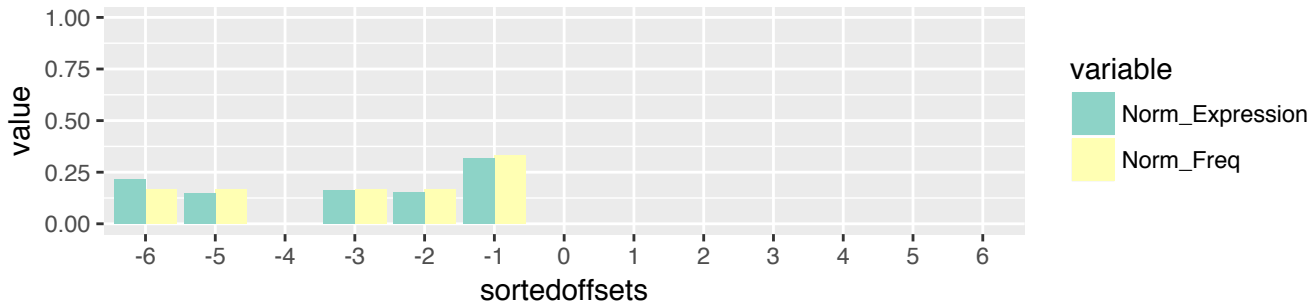

KIRP (n=696)  
 i-tRF & exclusive (n=112)  
 5' terminus relative to 5' stem of T-loop (n=6)

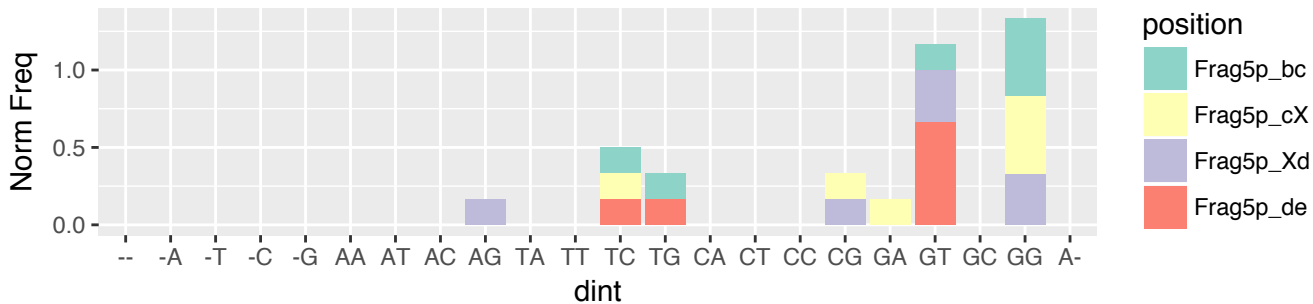

KIRP (n=696)  
 i-tRF & exclusive (n=112)  
 5' terminus relative to 5' stem of T-loop (n=6)

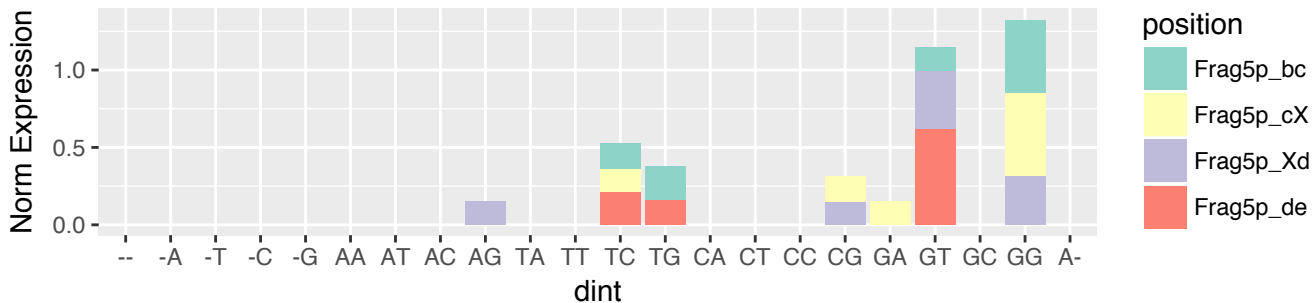

KIRP (n=696)  
i-tRF & exclusive (n=112)  
3' terminus relative to 3' stem of D-loop (n=1)



KIRP (n=696)  
i-tRF & exclusive (n=112)  
3' terminus relative to 3' stem of D-loop (n=1)



KIRP (n=696)  
i-tRF & exclusive (n=112)  
3' terminus relative to 3' stem of D-loop (n=1)



KIRP (n=696)  
i-tRF & exclusive (n=112)  
3' terminus relative to 5' stem of A-loop (n=35)

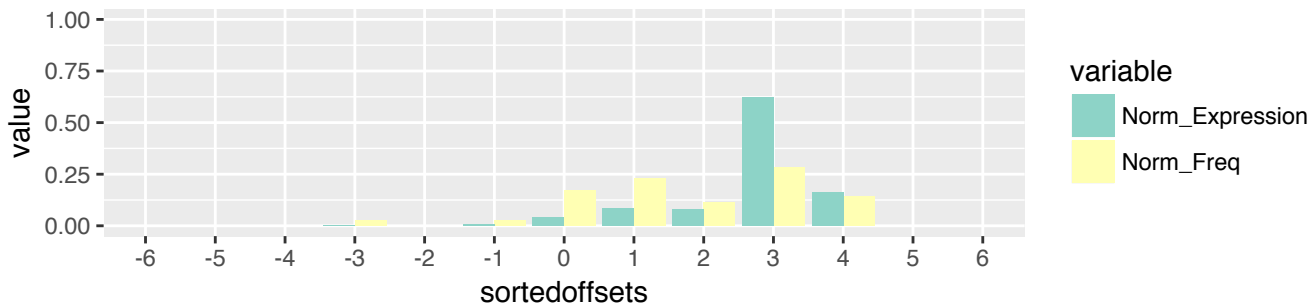

KIRP (n=696)  
i-tRF & exclusive (n=112)  
3' terminus relative to 5' stem of A-loop (n=35)

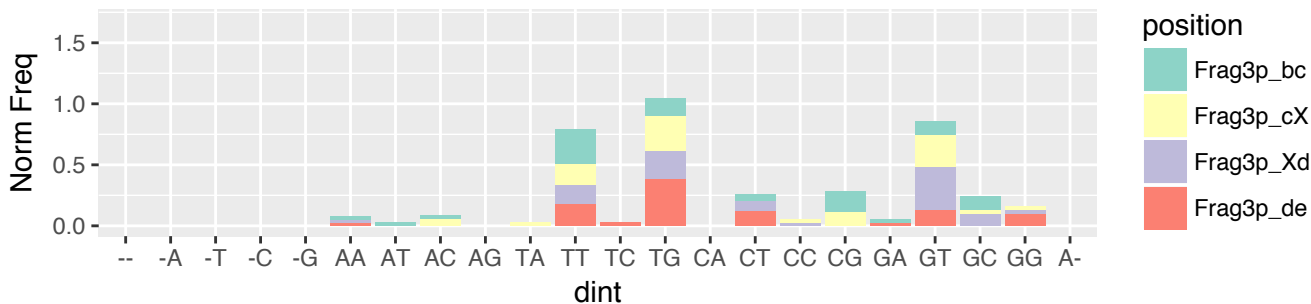

KIRP (n=696)  
i-tRF & exclusive (n=112)  
3' terminus relative to 5' stem of A-loop (n=35)

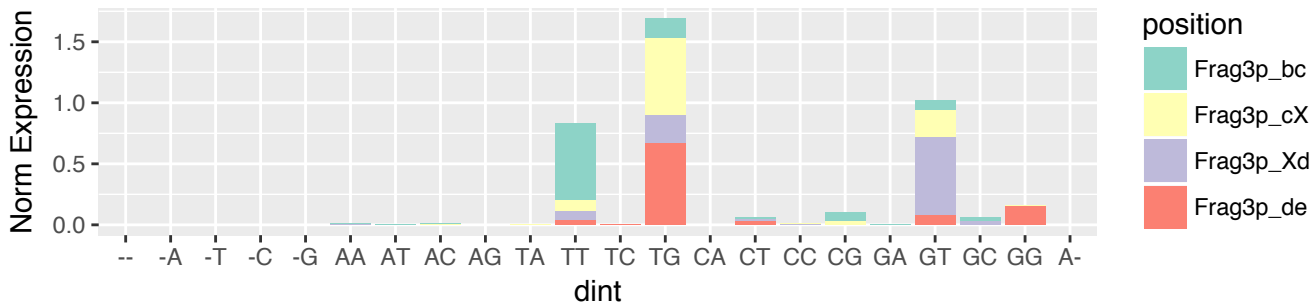



KIRP (n=696)  
i-tRF & exclusive (n=112)  
3' terminus relative to 3' stem of A-loop (n=15)

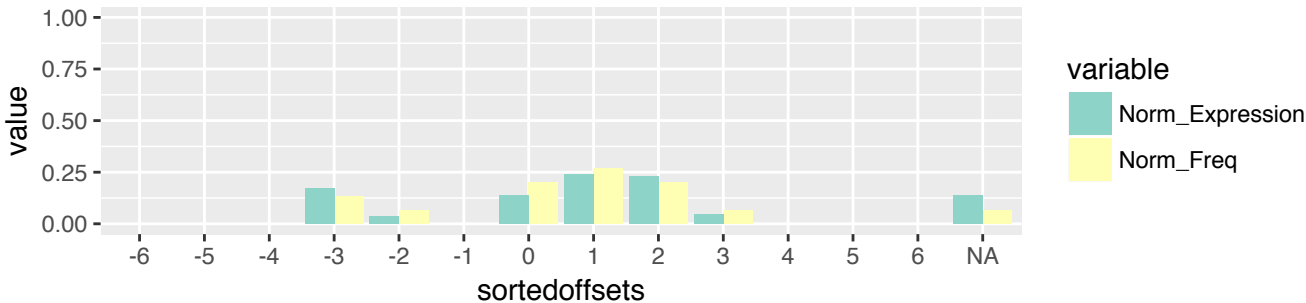

KIRP (n=696)  
i-tRF & exclusive (n=112)  
3' terminus relative to 3' stem of A-loop (n=15)

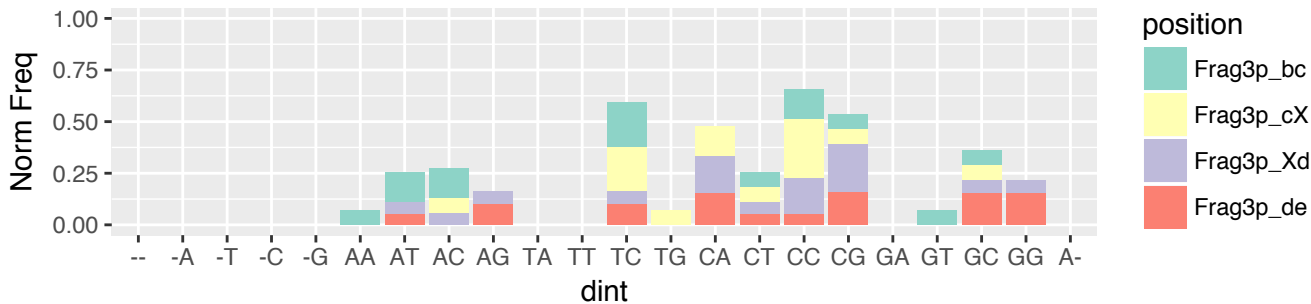

KIRP (n=696)  
i-tRF & exclusive (n=112)  
3' terminus relative to 3' stem of A-loop (n=15)

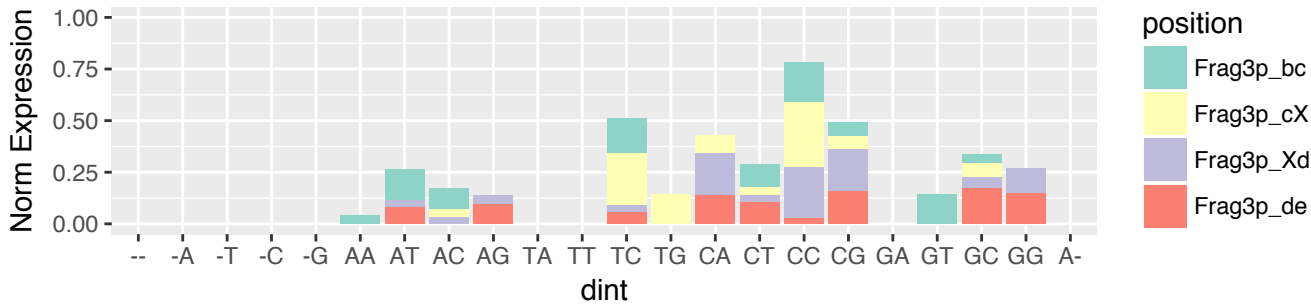

KIRP (n=696)  
i-tRF & exclusive (n=112)  
3' terminus relative to 5' stem of T-loop (n=16)

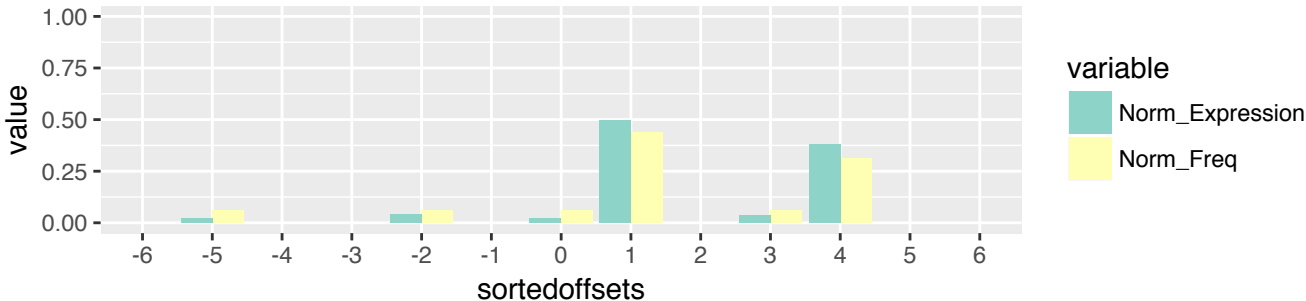

KIRP (n=696)  
i-tRF & exclusive (n=112)  
3' terminus relative to 5' stem of T-loop (n=16)

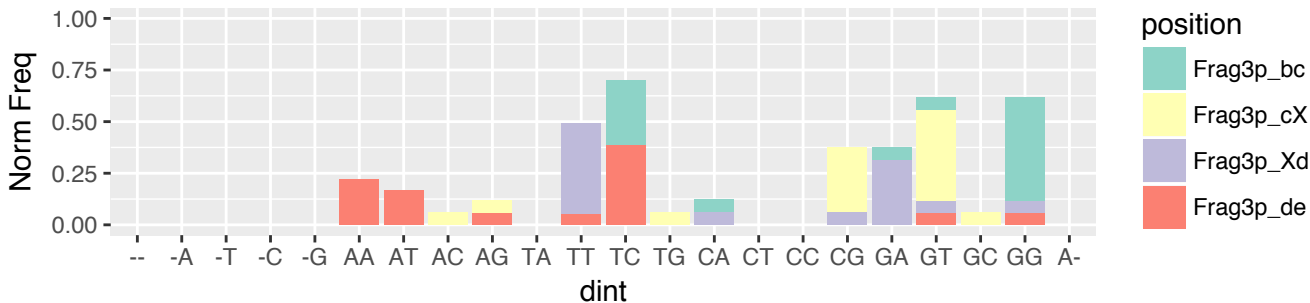

KIRP (n=696)  
i-tRF & exclusive (n=112)  
3' terminus relative to 5' stem of T-loop (n=16)

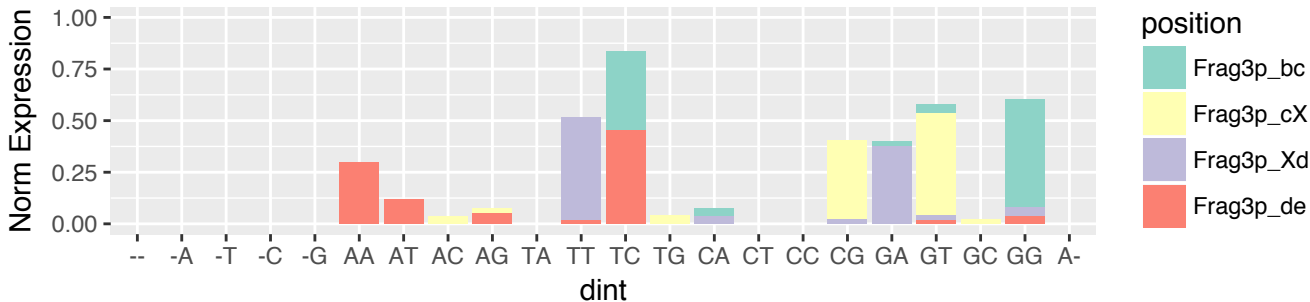

KIRP (n=696)  
i-tRF & exclusive (n=112)  
3' terminus relative to 3' stem of T-loop (n=35)

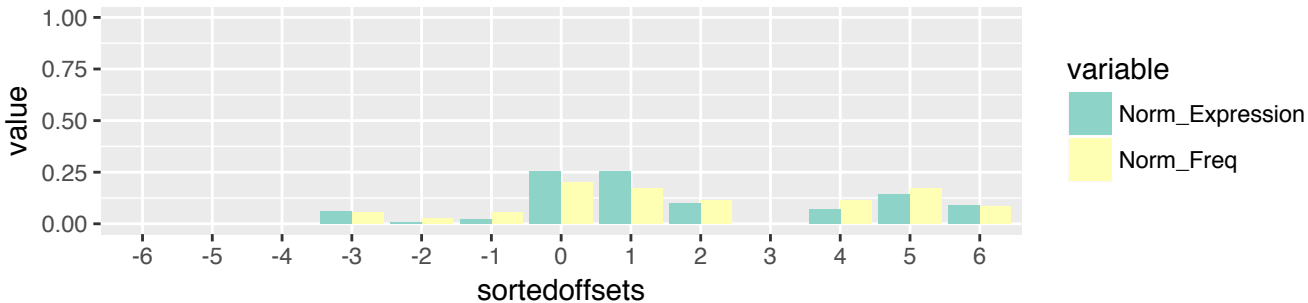

KIRP (n=696)  
i-tRF & exclusive (n=112)  
3' terminus relative to 3' stem of T-loop (n=35)

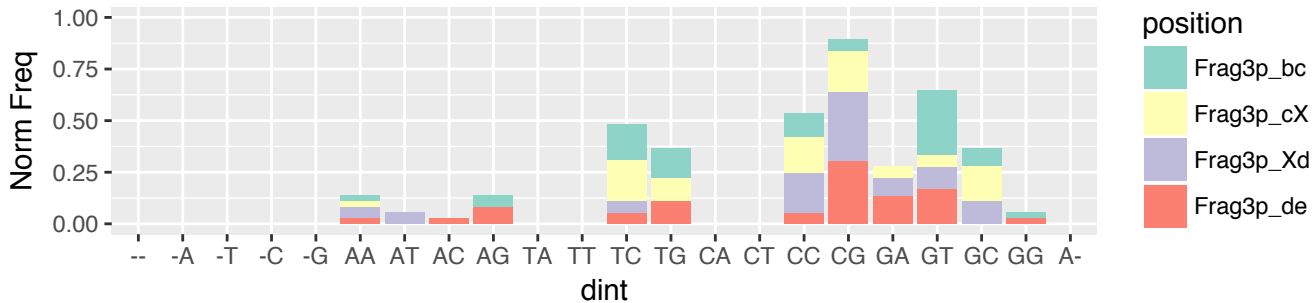

KIRP (n=696)  
i-tRF & exclusive (n=112)  
3' terminus relative to 3' stem of T-loop (n=35)

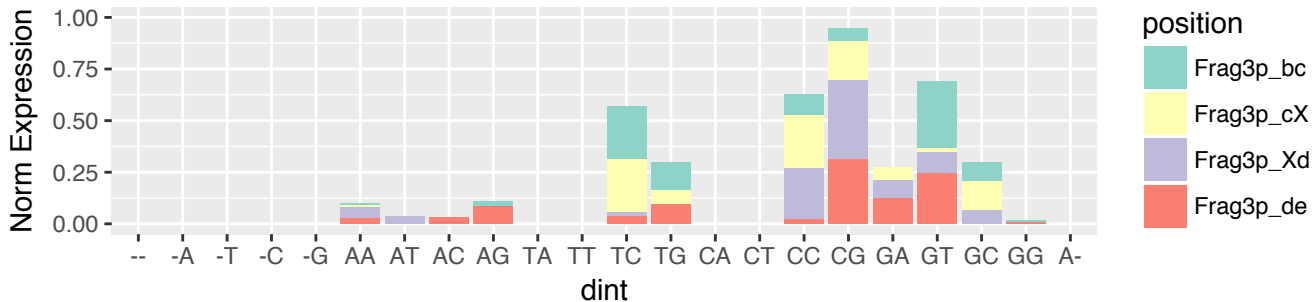

KIRP (n=696)  
i-tRF & exclusive (n=112)  
3' terminus relative to 3' end of the tRNA (n=11)

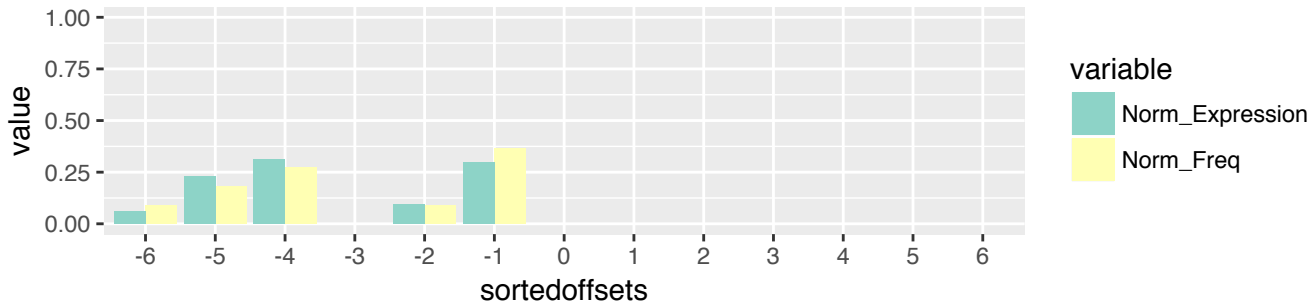

KIRP (n=696)  
i-tRF & exclusive (n=112)  
3' terminus relative to 3' end of the tRNA (n=11)

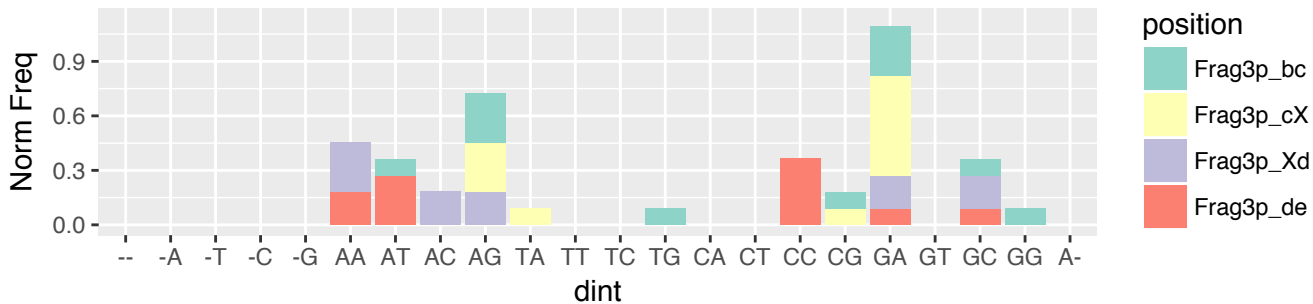

KIRP (n=696)  
i-tRF & exclusive (n=112)  
3' terminus relative to 3' end of the tRNA (n=11)

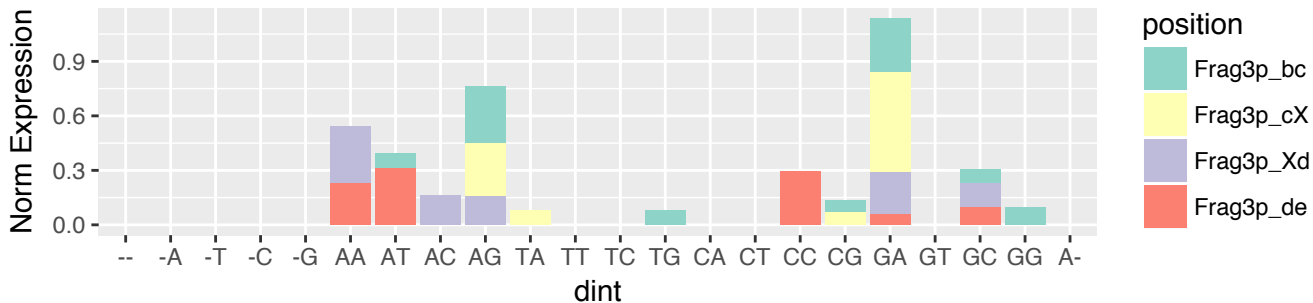

KIRP (n=696)  
 3'-tRF & exclusive (n=152)  
 5' terminus relative to 5' stem of T-loop (n=104)

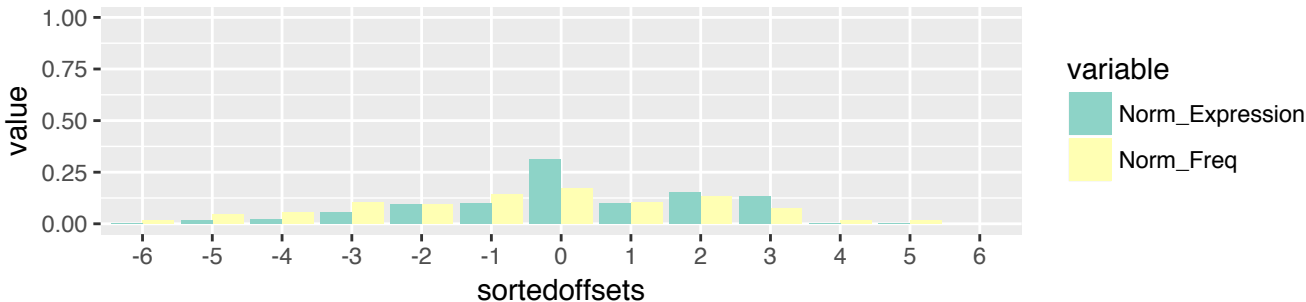

KIRP (n=696)  
 3'-tRF & exclusive (n=152)  
 5' terminus relative to 5' stem of T-loop (n=104)

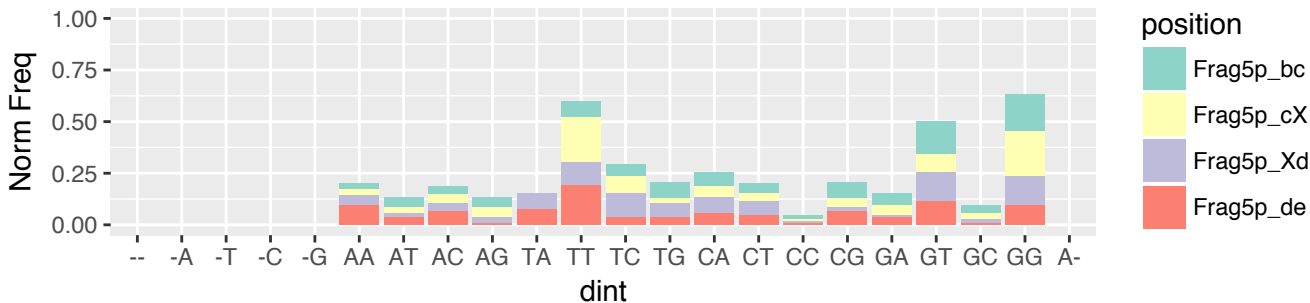

KIRP (n=696)  
 3'-tRF & exclusive (n=152)  
 5' terminus relative to 5' stem of T-loop (n=104)

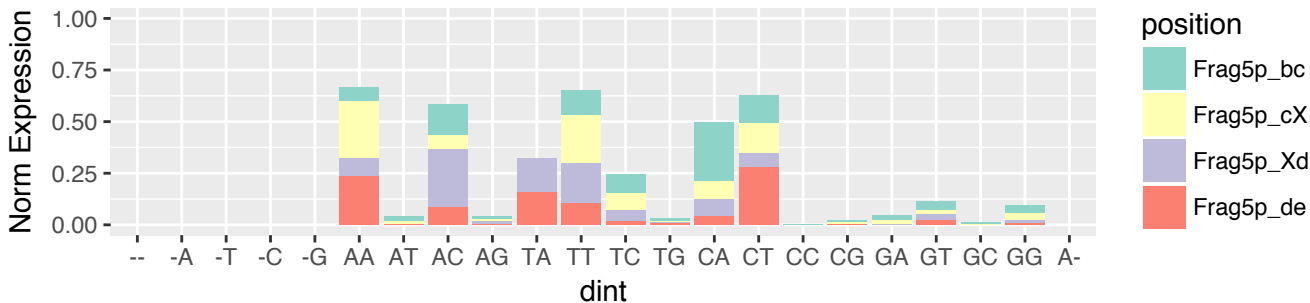

KIRP (n=696)  
 3'-tRF & exclusive (n=152)  
 5' terminus relative to 3' stem of T-loop (n=48)

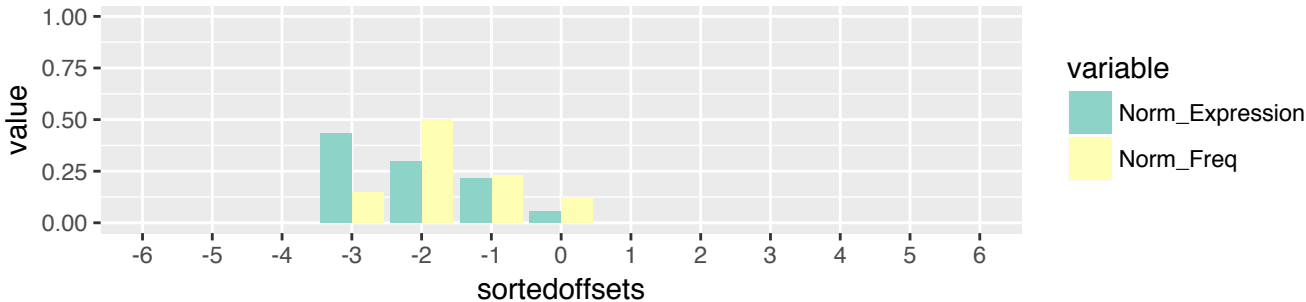

KIRP (n=696)  
 3'-tRF & exclusive (n=152)  
 5' terminus relative to 3' stem of T-loop (n=48)

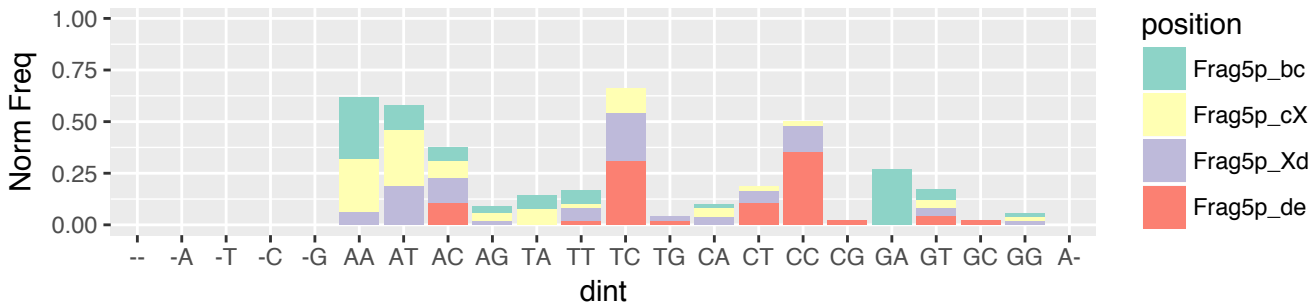

KIRP (n=696)  
 3'-tRF & exclusive (n=152)  
 5' terminus relative to 3' stem of T-loop (n=48)

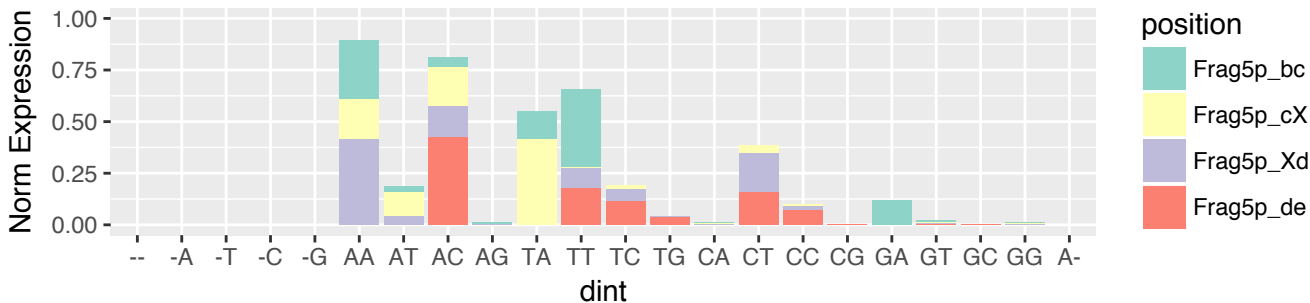

KIRP (n=696)  
 3'-tRF & exclusive (n=152)  
 3' terminus relative to 3' end of the tRNA (n=152)

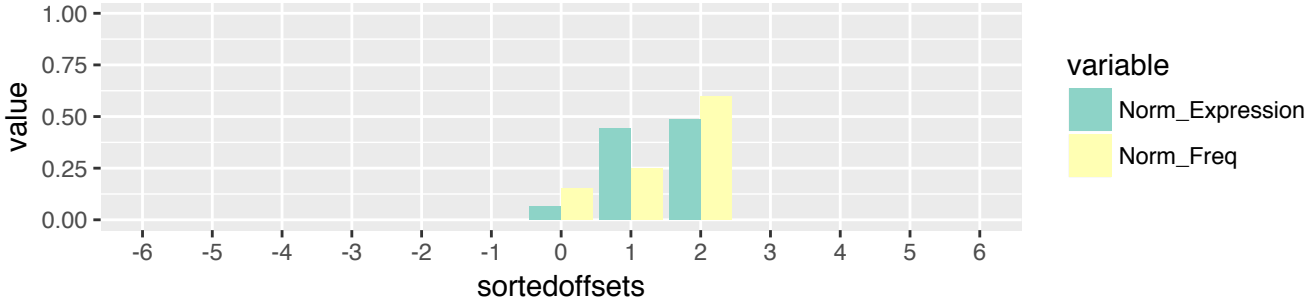

KIRP (n=696)  
 3'-tRF & exclusive (n=152)  
 3' terminus relative to 3' end of the tRNA (n=152)

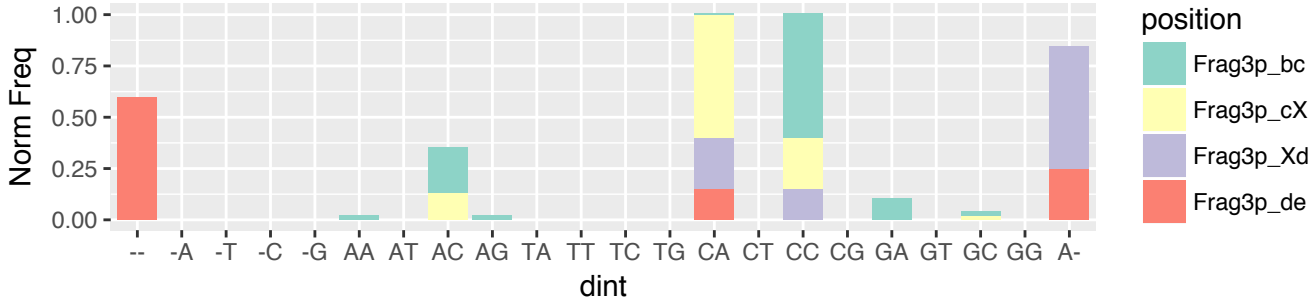

KIRP (n=696)  
 3'-tRF & exclusive (n=152)  
 3' terminus relative to 3' end of the tRNA (n=152)

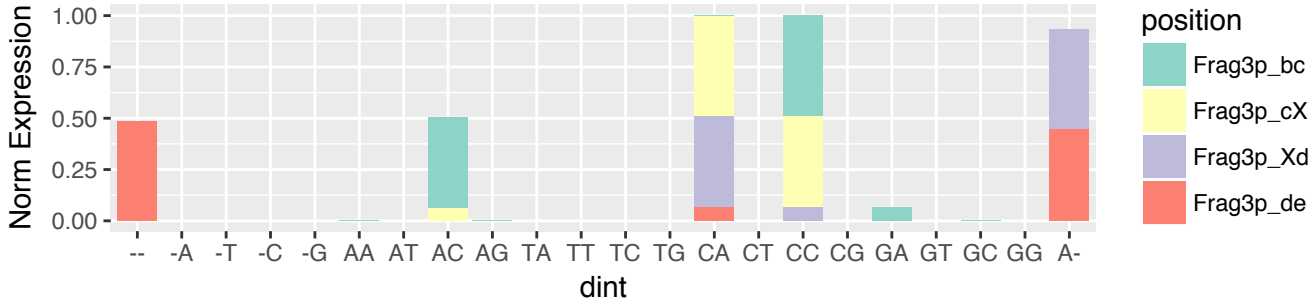

LAML (n=1909)  
 5'-half & exclusive (n=5)  
 5' terminus relative to 5' end of the tRNA (n=5)

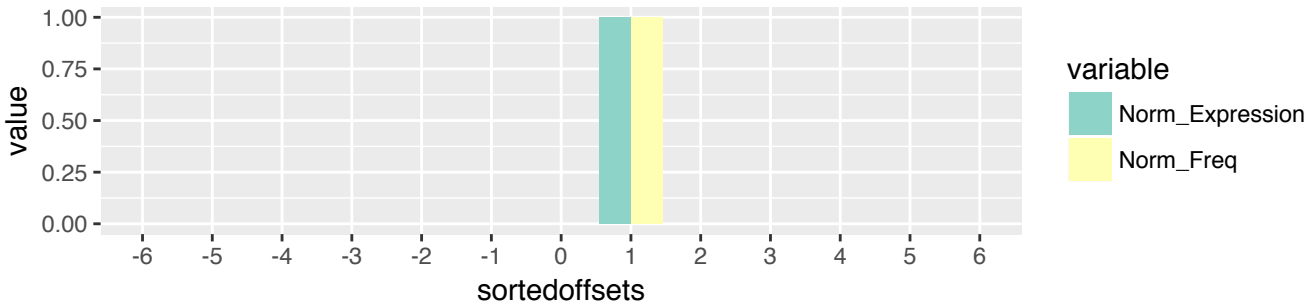

LAML (n=1909)  
 5'-half & exclusive (n=5)  
 5' terminus relative to 5' end of the tRNA (n=5)



LAML (n=1909)  
 5'-half & exclusive (n=5)  
 5' terminus relative to 5' end of the tRNA (n=5)

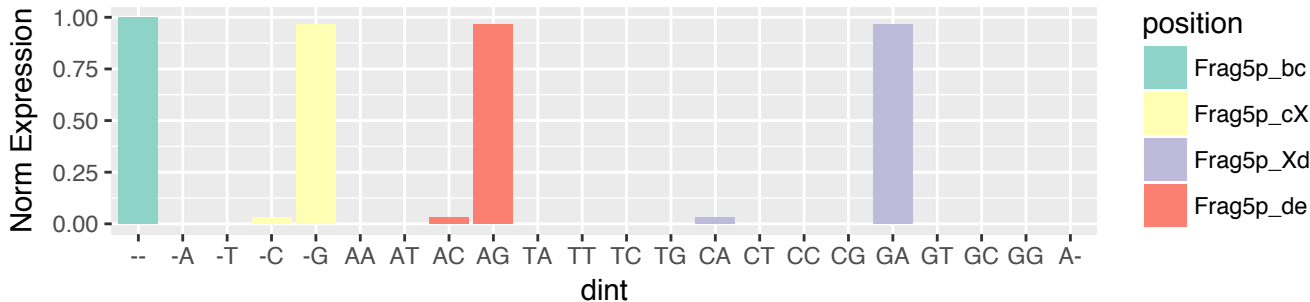



LAML (n=1909)  
 5'-half & exclusive (n=5)  
 3' terminus relative to 5' stem of A-loop (n=5)

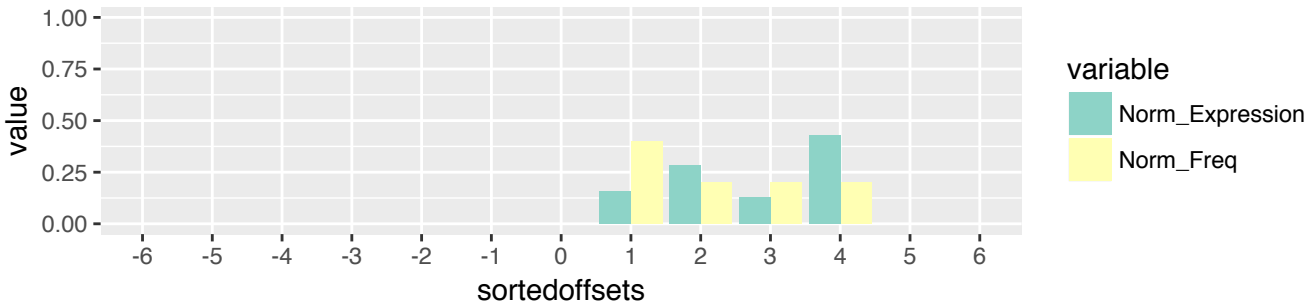

LAML (n=1909)  
 5'-half & exclusive (n=5)  
 3' terminus relative to 5' stem of A-loop (n=5)

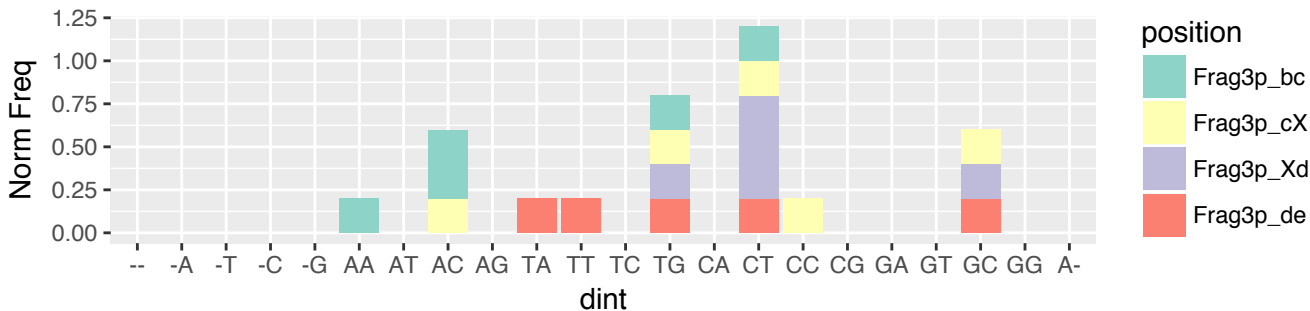

LAML (n=1909)  
 5'-half & exclusive (n=5)  
 3' terminus relative to 5' stem of A-loop (n=5)

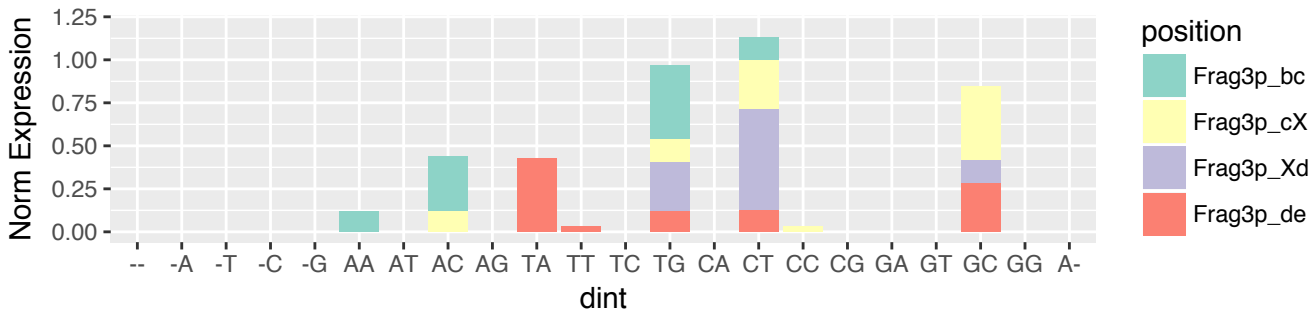

LAML (n=1909)

5'-tRF & exclusive (n=223)

5' terminus relative to 5' end of the tRNA (n=223)

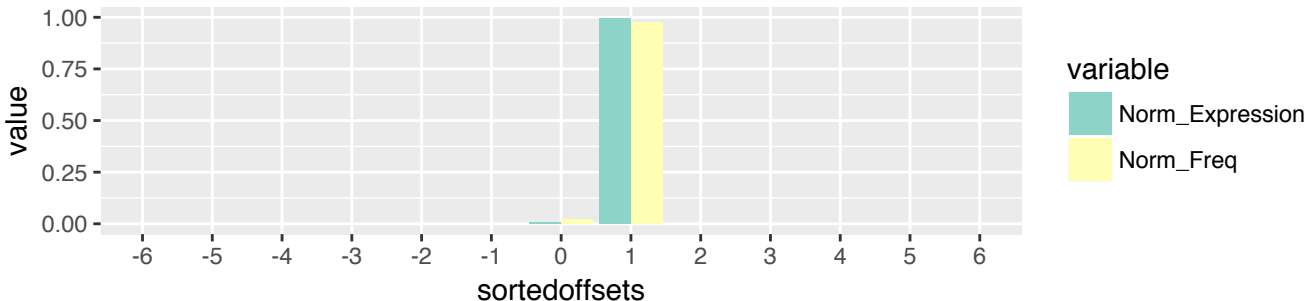

LAML (n=1909)

5'-tRF & exclusive (n=223)

5' terminus relative to 5' end of the tRNA (n=223)

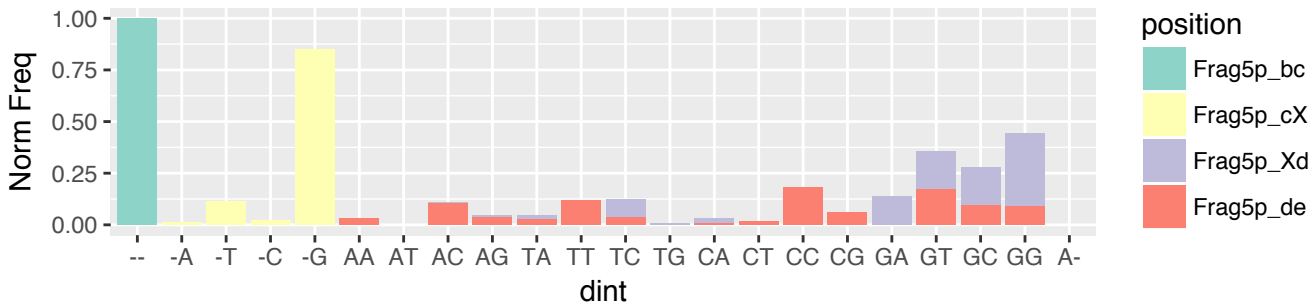

LAML (n=1909)

5'-tRF & exclusive (n=223)

5' terminus relative to 5' end of the tRNA (n=223)

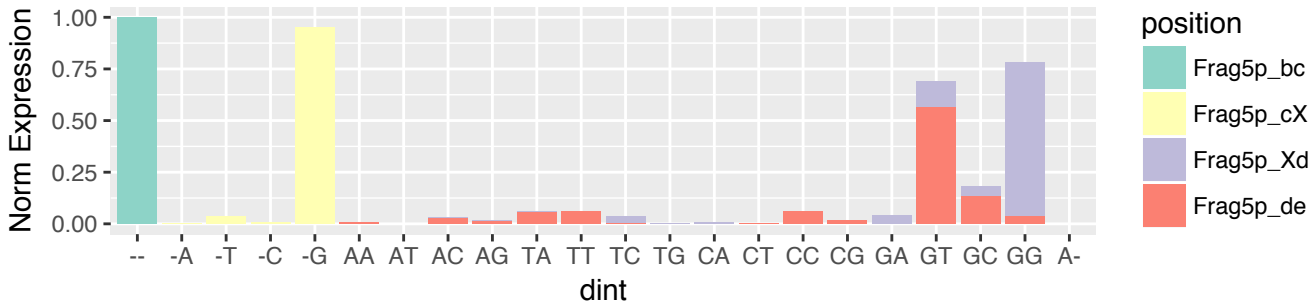

LAML (n=1909)  
 5'-tRF & exclusive (n=223)  
 3' terminus relative to 5' stem of D-loop (n=15)

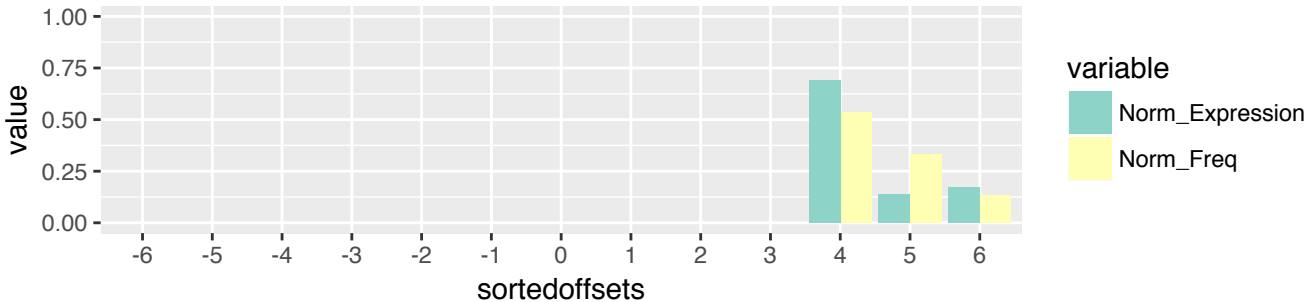

LAML (n=1909)  
 5'-tRF & exclusive (n=223)  
 3' terminus relative to 5' stem of D-loop (n=15)

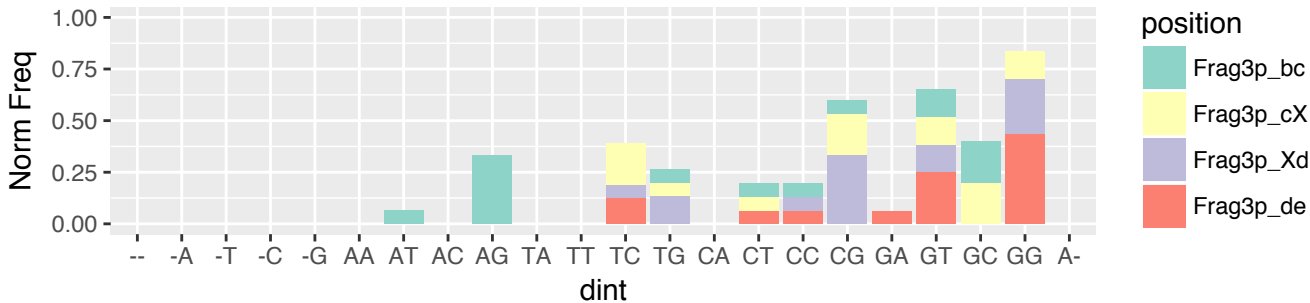

LAML (n=1909)  
 5'-tRF & exclusive (n=223)  
 3' terminus relative to 5' stem of D-loop (n=15)

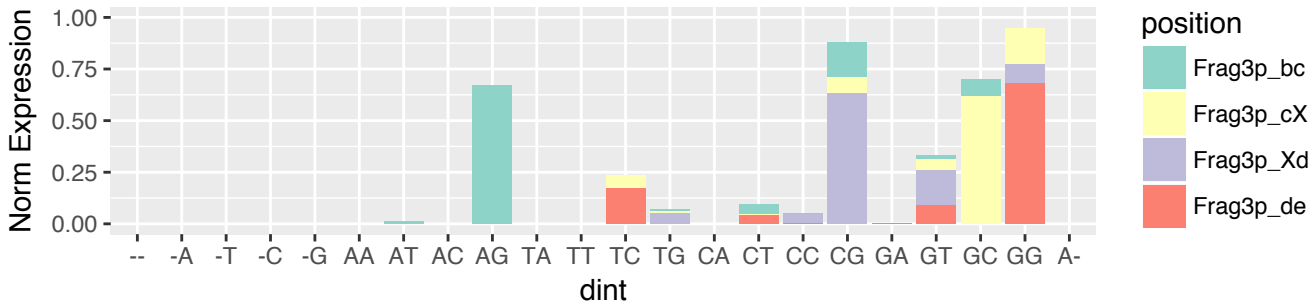

LAML (n=1909)  
 5'-tRF & exclusive (n=223)  
 3' terminus relative to 3' stem of D-loop (n=193)

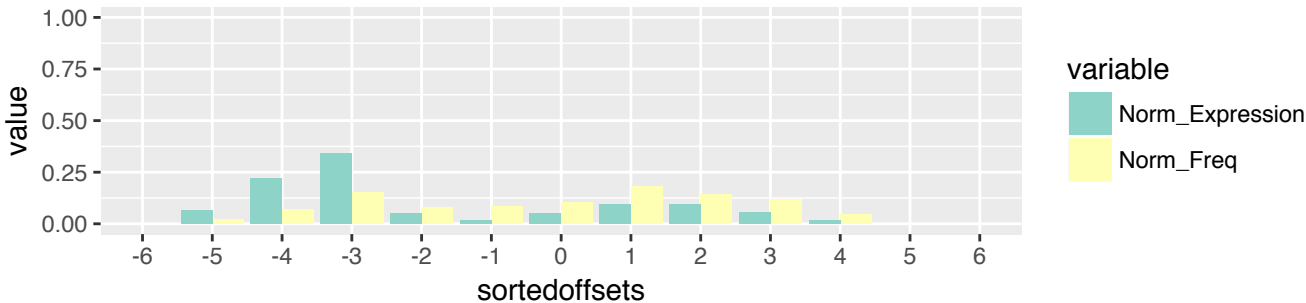

LAML (n=1909)  
 5'-tRF & exclusive (n=223)  
 3' terminus relative to 3' stem of D-loop (n=193)

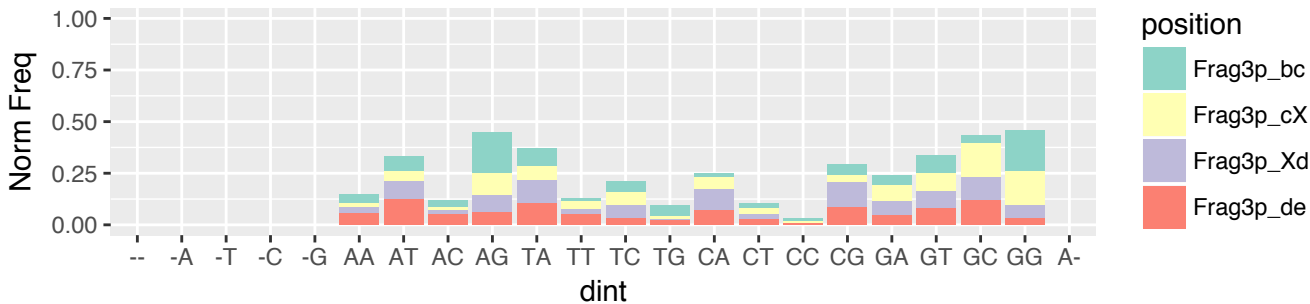

LAML (n=1909)  
 5'-tRF & exclusive (n=223)  
 3' terminus relative to 3' stem of D-loop (n=193)

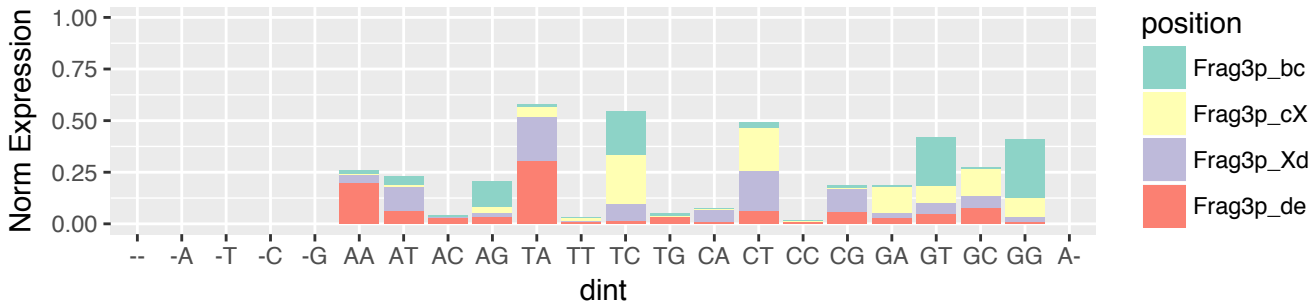

LAML (n=1909)  
 5'-tRF & exclusive (n=223)  
 3' terminus relative to 5' stem of A-loop (n=10)

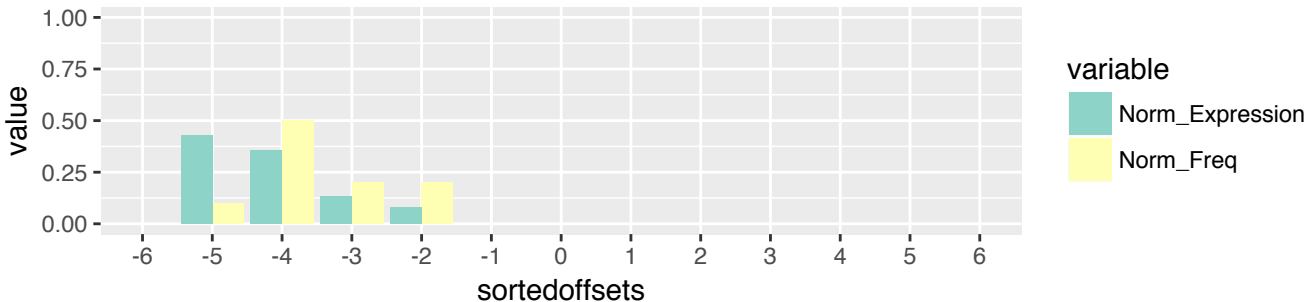

LAML (n=1909)  
 5'-tRF & exclusive (n=223)  
 3' terminus relative to 5' stem of A-loop (n=10)

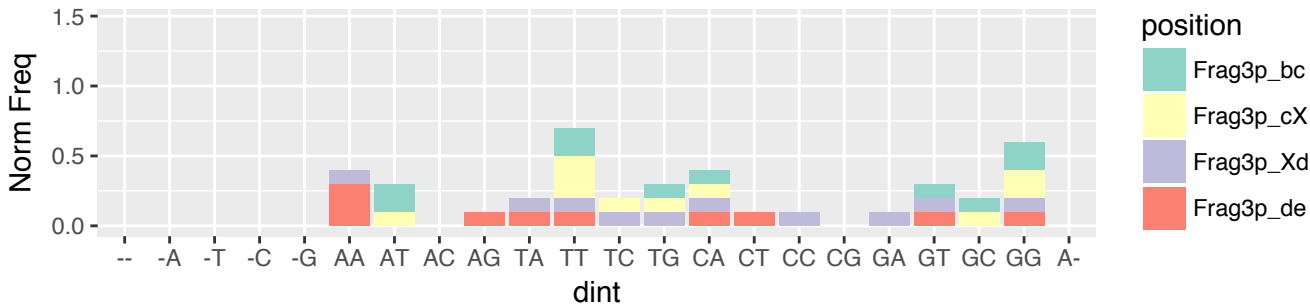

LAML (n=1909)  
 5'-tRF & exclusive (n=223)  
 3' terminus relative to 5' stem of A-loop (n=10)

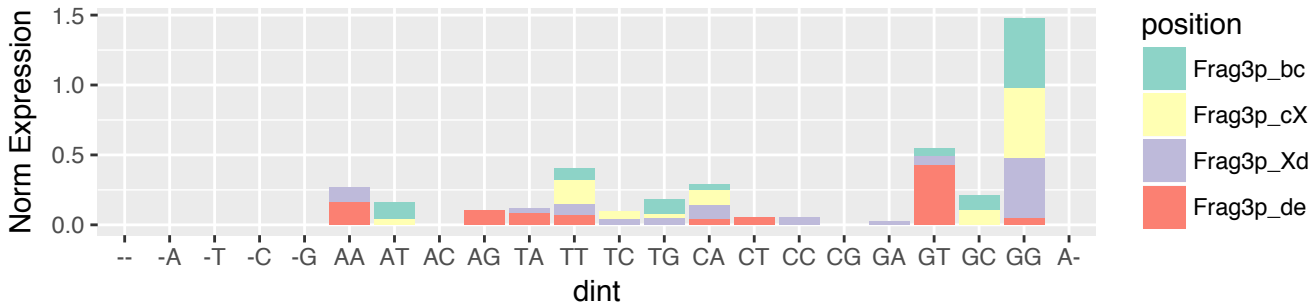

LAML (n=1909)  
 5'-tRF & exclusive (n=223)  
 3' terminus relative to 3' stem of A-loop (n=5)

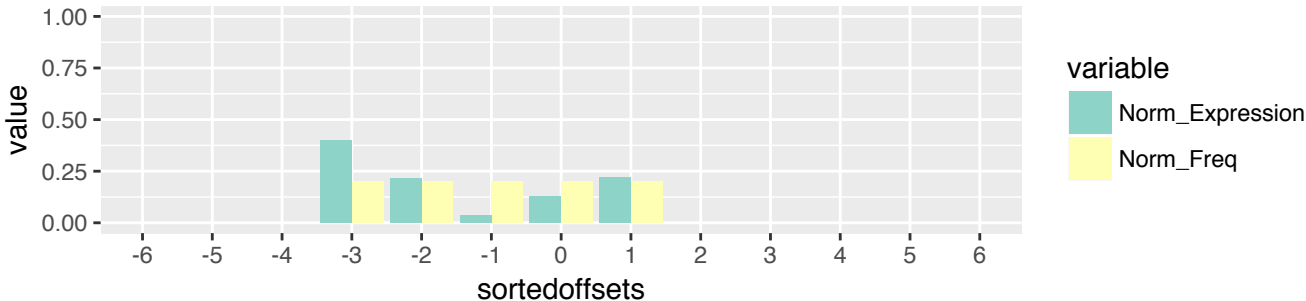

LAML (n=1909)  
 5'-tRF & exclusive (n=223)  
 3' terminus relative to 3' stem of A-loop (n=5)

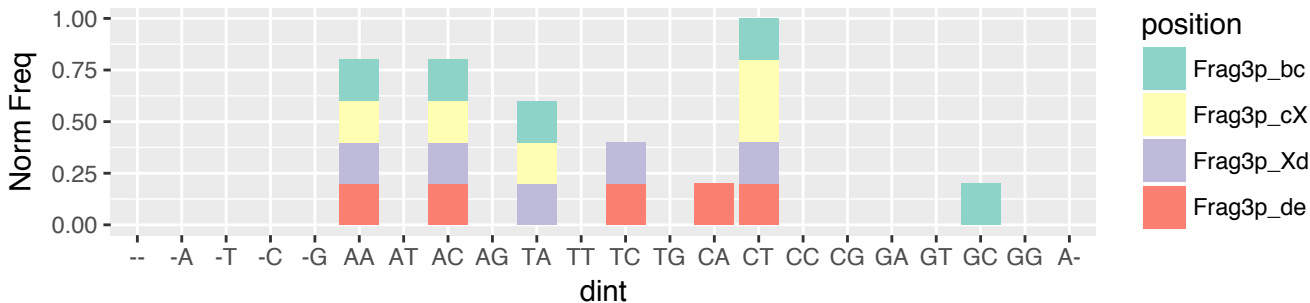

LAML (n=1909)  
 5'-tRF & exclusive (n=223)  
 3' terminus relative to 3' stem of A-loop (n=5)

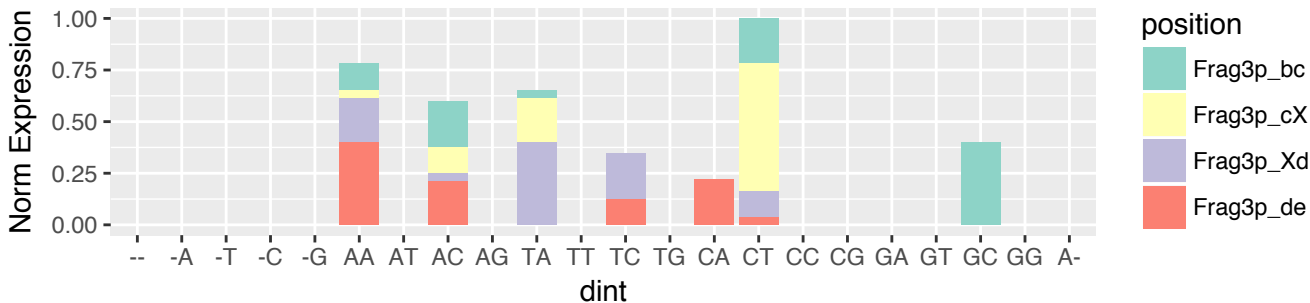

LAML (n=1909)  
i-tRF & exclusive (n=542)  
5' terminus relative to 5' end of the tRNA (n=22)

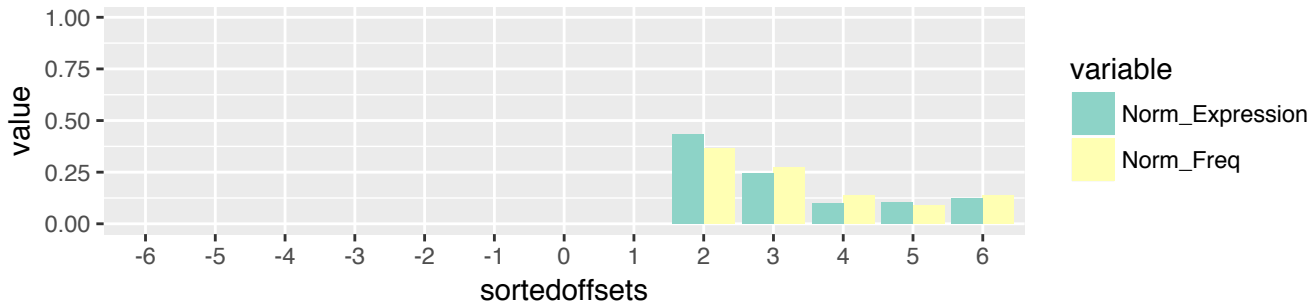

LAML (n=1909)  
i-tRF & exclusive (n=542)  
5' terminus relative to 5' end of the tRNA (n=22)

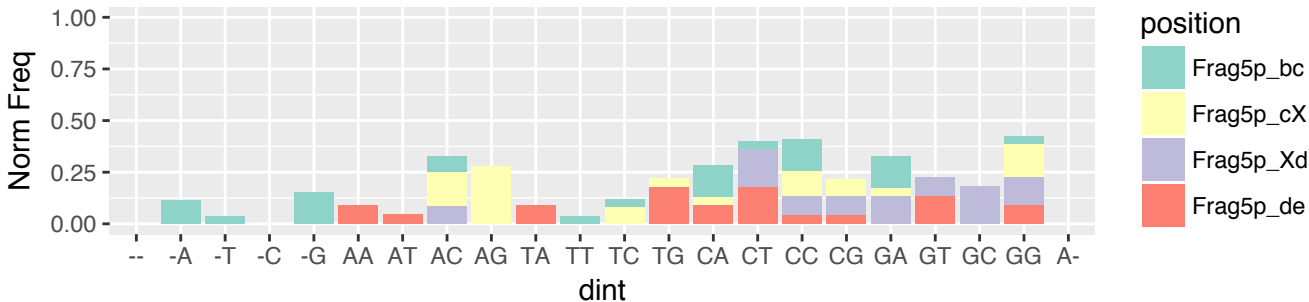

LAML (n=1909)  
i-tRF & exclusive (n=542)  
5' terminus relative to 5' end of the tRNA (n=22)

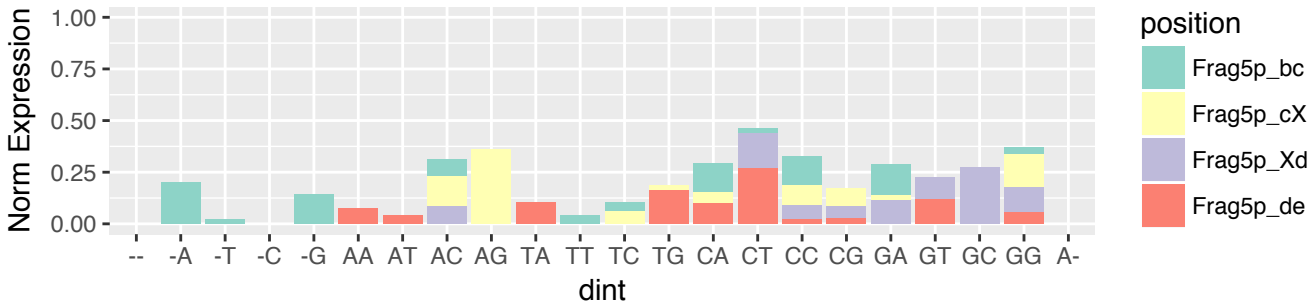

LAML (n=1909)  
i-tRF & exclusive (n=542)  
5' terminus relative to 5' stem of D-loop (n=212)

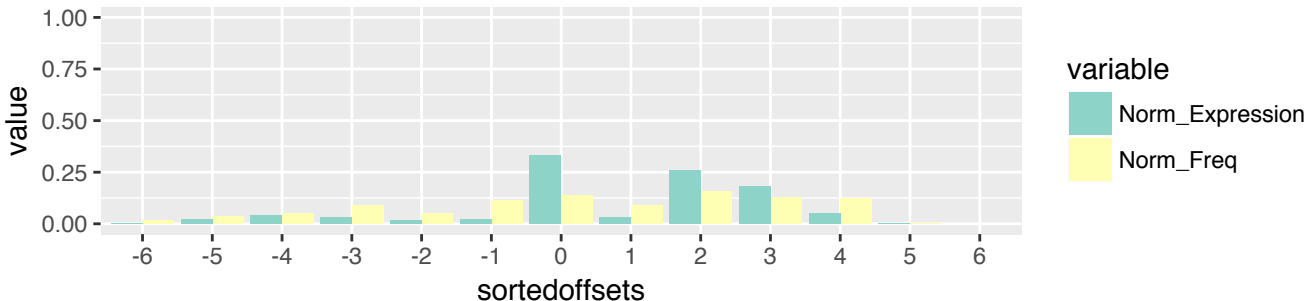

LAML (n=1909)  
i-tRF & exclusive (n=542)  
5' terminus relative to 5' stem of D-loop (n=212)

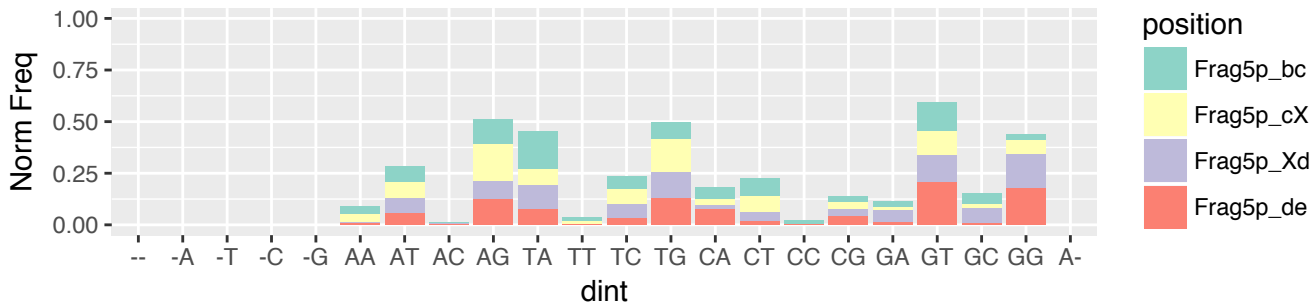

LAML (n=1909)  
i-tRF & exclusive (n=542)  
5' terminus relative to 5' stem of D-loop (n=212)

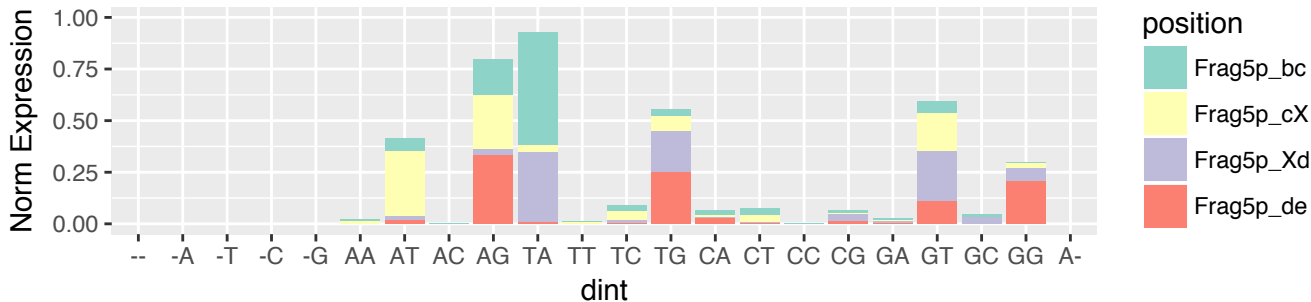



LAML (n=1909)  
 i-tRF & exclusive (n=542)  
 5' terminus relative to 3' stem of D-loop (n=24)

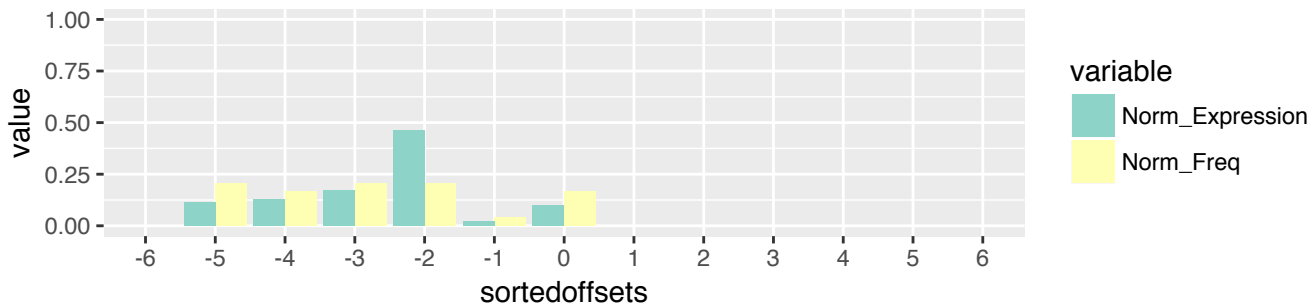

LAML (n=1909)  
 i-tRF & exclusive (n=542)  
 5' terminus relative to 3' stem of D-loop (n=24)

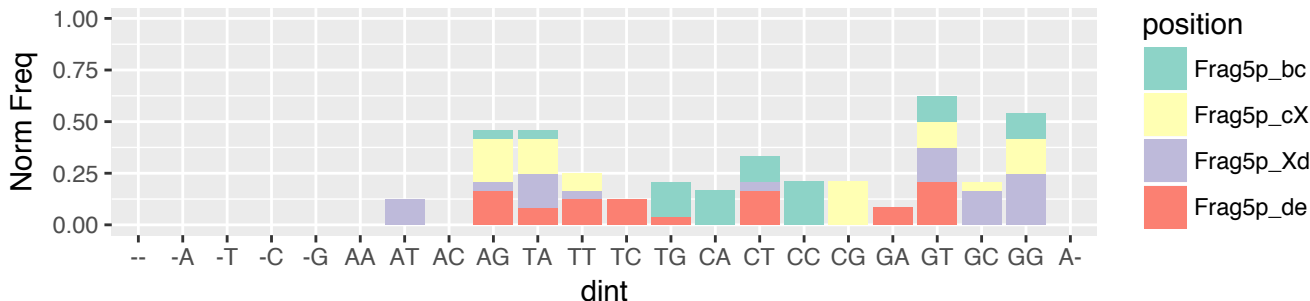

LAML (n=1909)  
 i-tRF & exclusive (n=542)  
 5' terminus relative to 3' stem of D-loop (n=24)

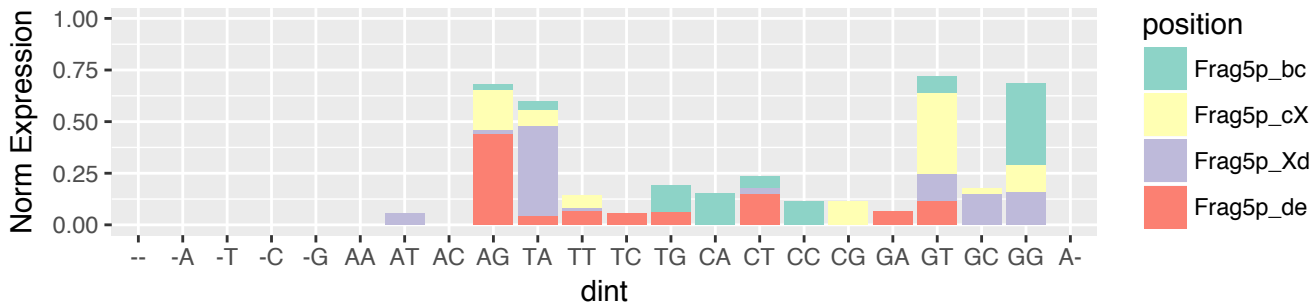

LAML (n=1909)  
i-tRF & exclusive (n=542)  
5' terminus relative to 5' stem of A-loop (n=151)

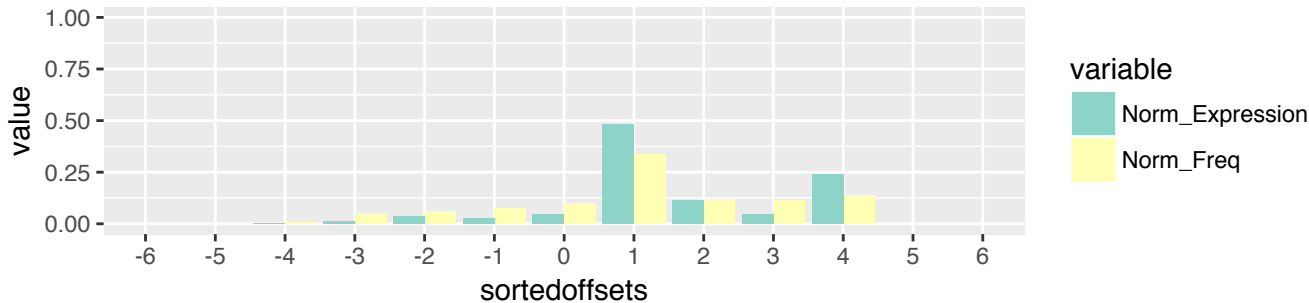

LAML (n=1909)  
i-tRF & exclusive (n=542)  
5' terminus relative to 5' stem of A-loop (n=151)

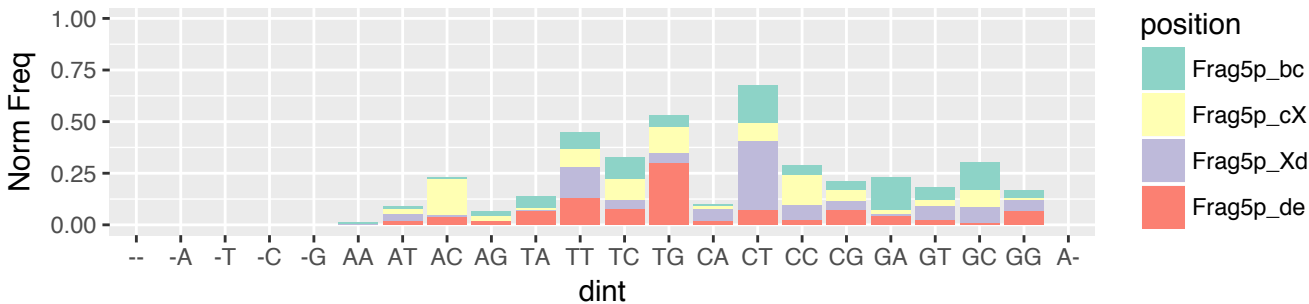

LAML (n=1909)  
i-tRF & exclusive (n=542)  
5' terminus relative to 5' stem of A-loop (n=151)

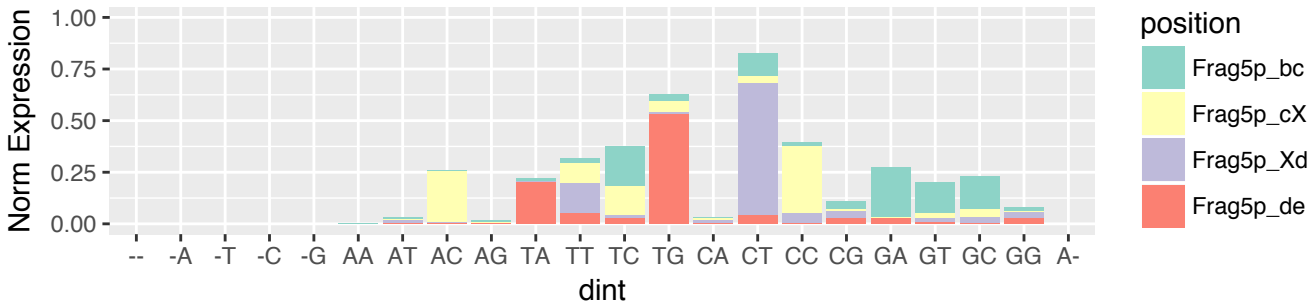

LAML (n=1909)  
i-tRF & exclusive (n=542)  
5' terminus relative to 3' stem of A-loop (n=88)

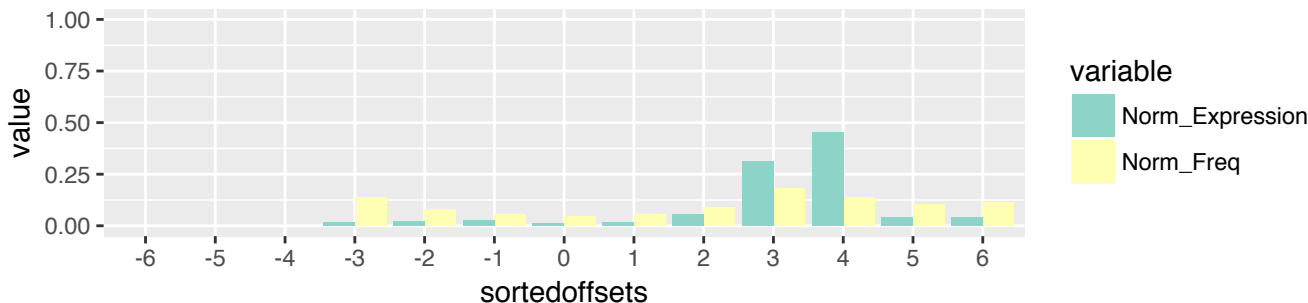

LAML (n=1909)  
i-tRF & exclusive (n=542)  
5' terminus relative to 3' stem of A-loop (n=88)

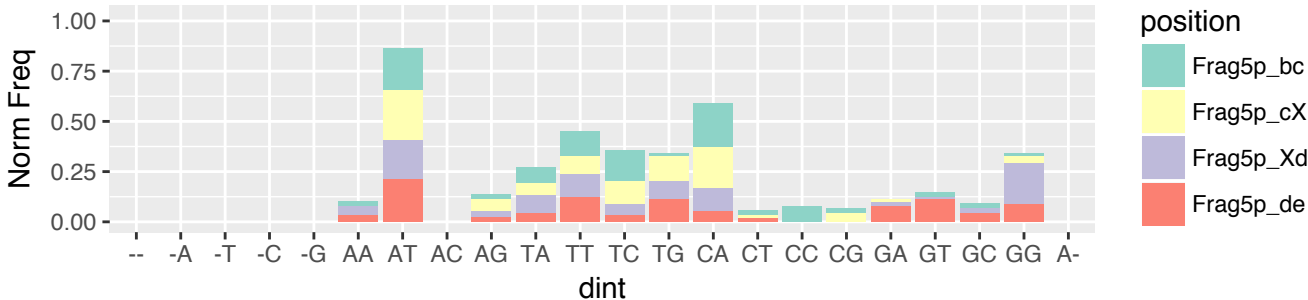

LAML (n=1909)  
i-tRF & exclusive (n=542)  
5' terminus relative to 3' stem of A-loop (n=88)

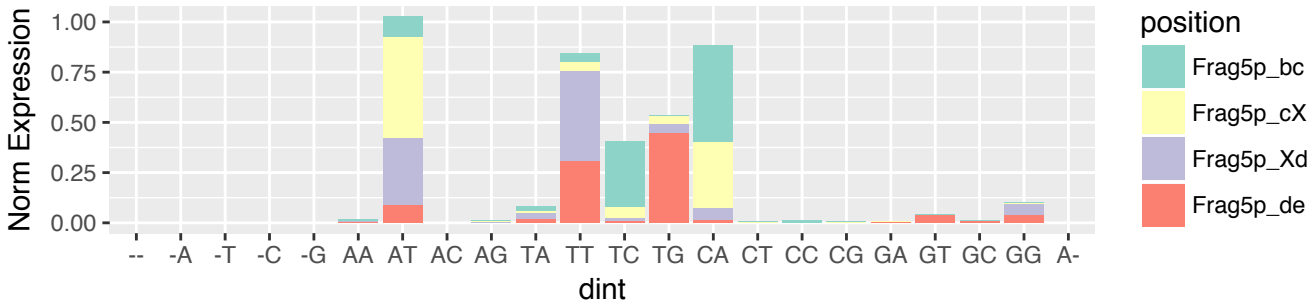

LAML (n=1909)  
 i-tRF & exclusive (n=542)  
 5' terminus relative to 5' stem of T-loop (n=45)

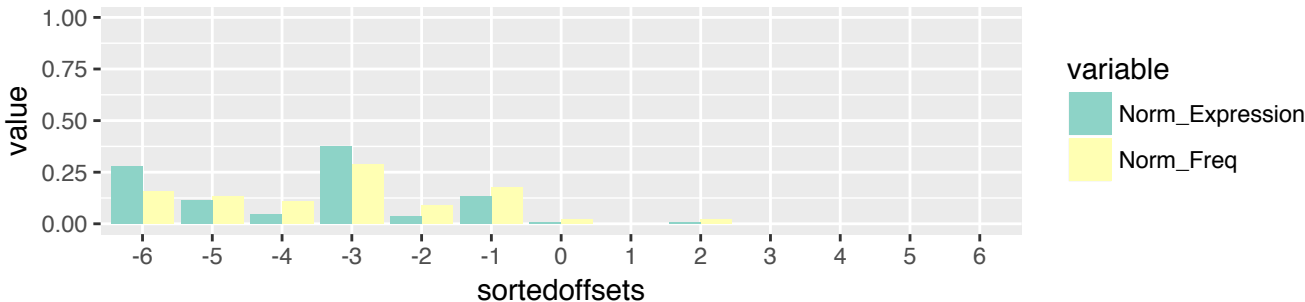

LAML (n=1909)  
 i-tRF & exclusive (n=542)  
 5' terminus relative to 5' stem of T-loop (n=45)

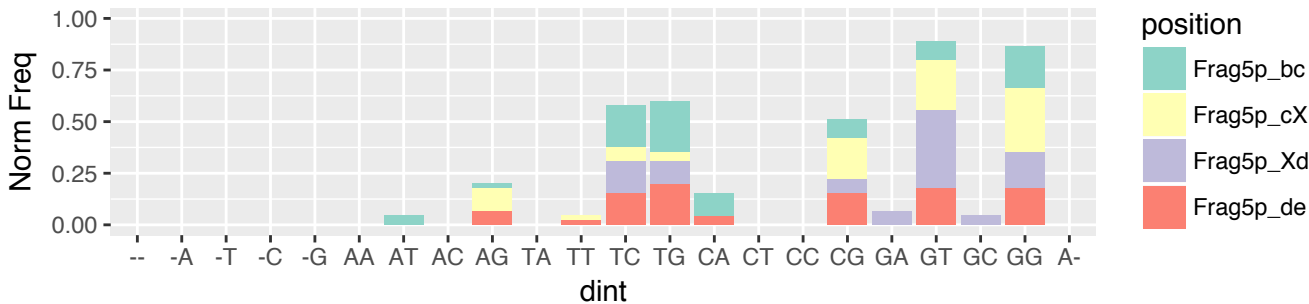

LAML (n=1909)  
 i-tRF & exclusive (n=542)  
 5' terminus relative to 5' stem of T-loop (n=45)

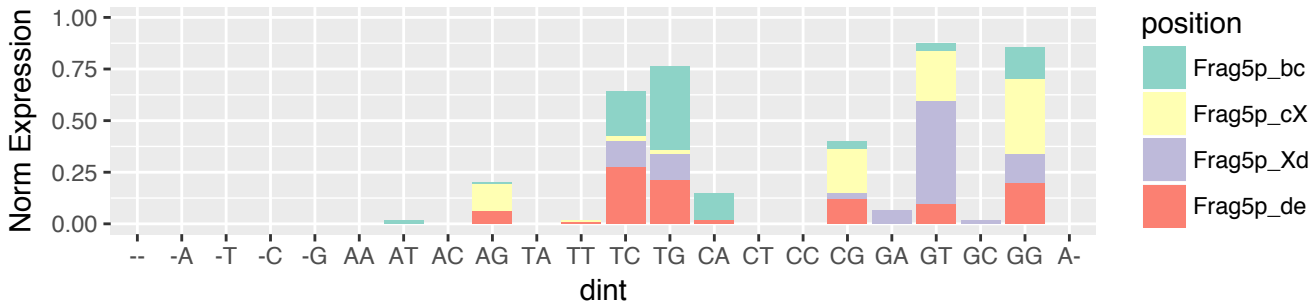

LAML (n=1909)  
i-tRF & exclusive (n=542)  
3' terminus relative to 3' stem of D-loop (n=16)

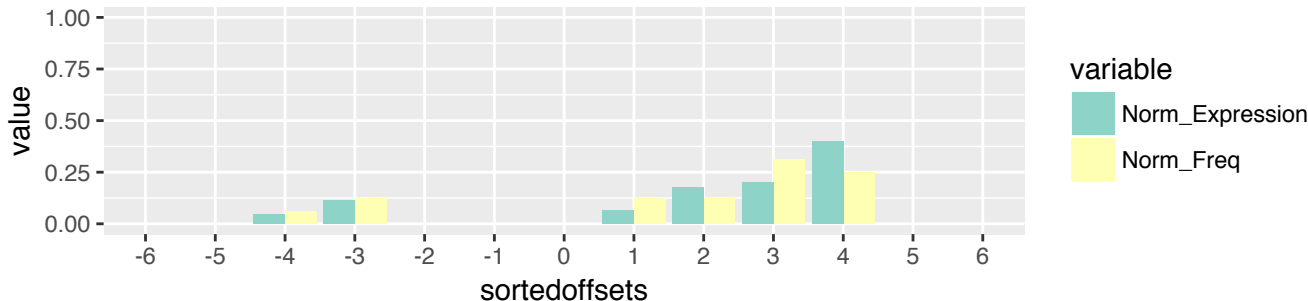

LAML (n=1909)  
i-tRF & exclusive (n=542)  
3' terminus relative to 3' stem of D-loop (n=16)

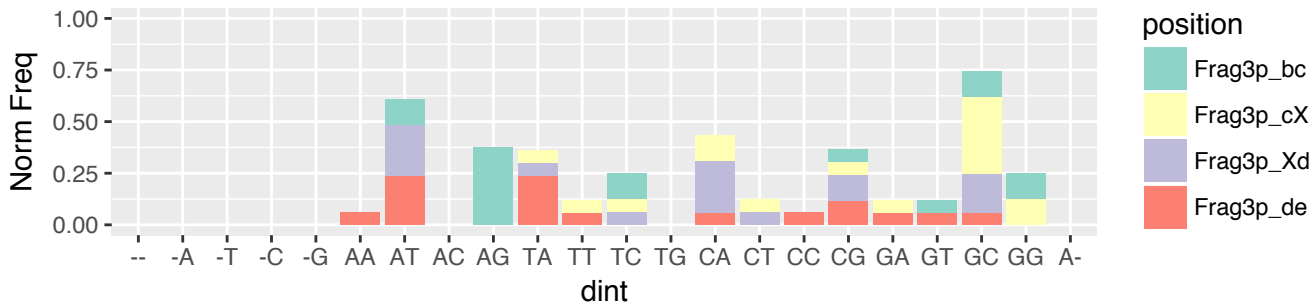

LAML (n=1909)  
i-tRF & exclusive (n=542)  
3' terminus relative to 3' stem of D-loop (n=16)

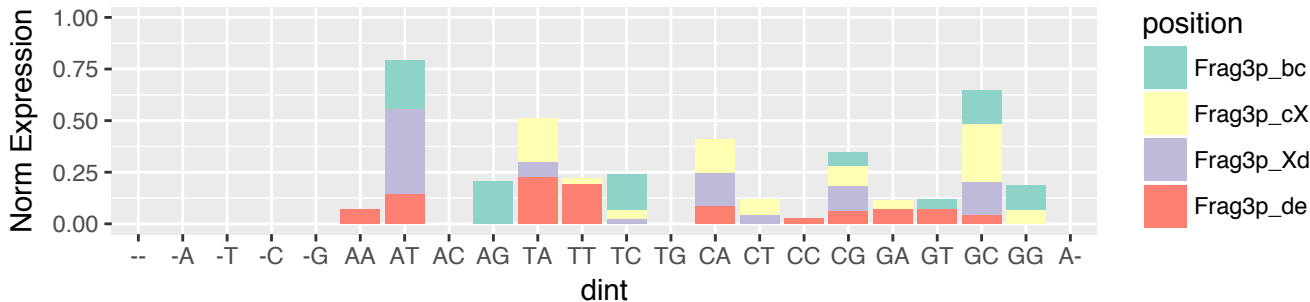

LAML (n=1909)  
 i-tRF & exclusive (n=542)  
 3' terminus relative to 5' stem of A-loop (n=165)

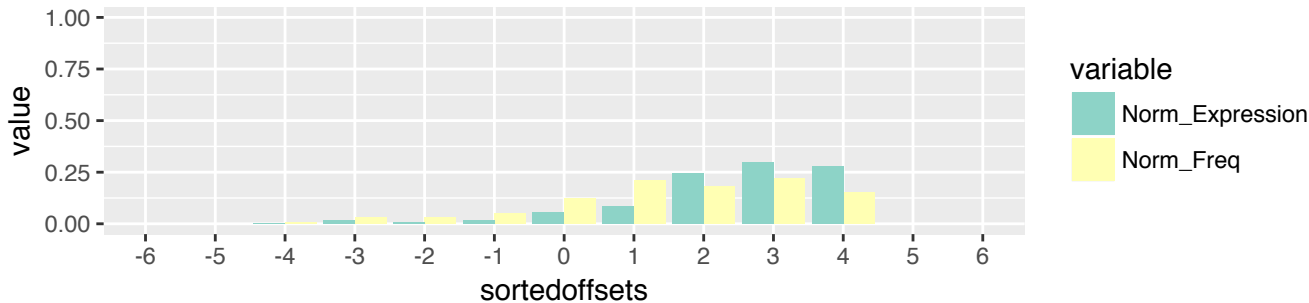

LAML (n=1909)  
 i-tRF & exclusive (n=542)  
 3' terminus relative to 5' stem of A-loop (n=165)

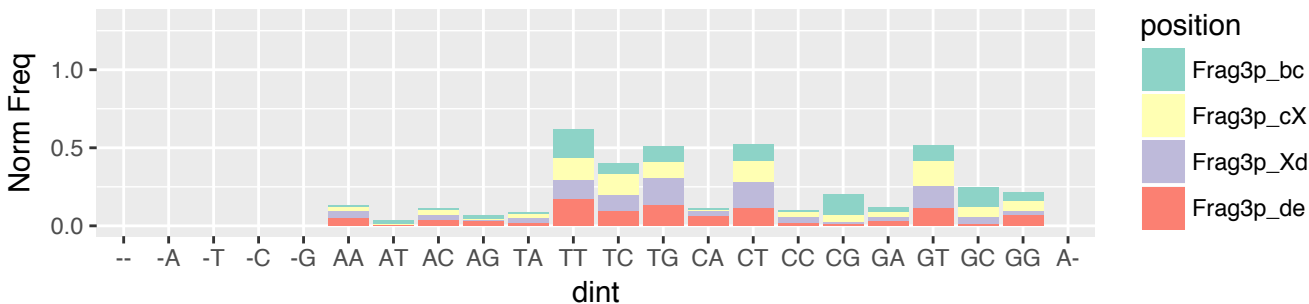

LAML (n=1909)  
 i-tRF & exclusive (n=542)  
 3' terminus relative to 5' stem of A-loop (n=165)

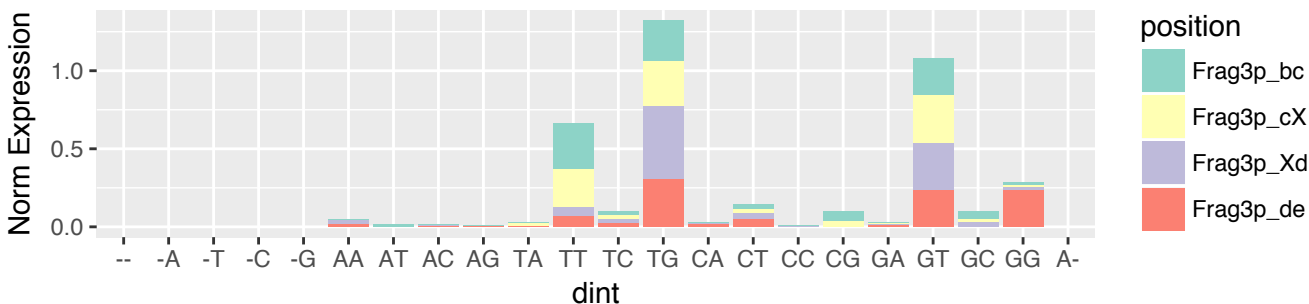

LAML (n=1909)  
i-tRF & exclusive (n=542)  
3' terminus relative to 3' stem of A-loop (n=96)

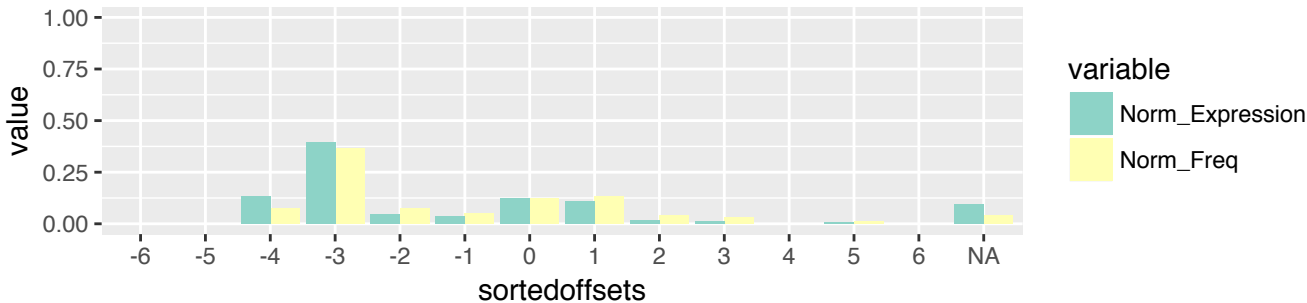

LAML (n=1909)  
i-tRF & exclusive (n=542)  
3' terminus relative to 3' stem of A-loop (n=96)

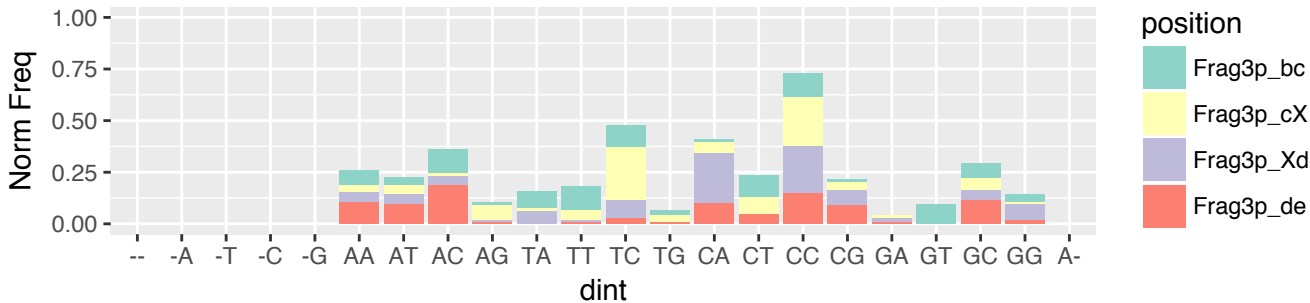

LAML (n=1909)  
i-tRF & exclusive (n=542)  
3' terminus relative to 3' stem of A-loop (n=96)

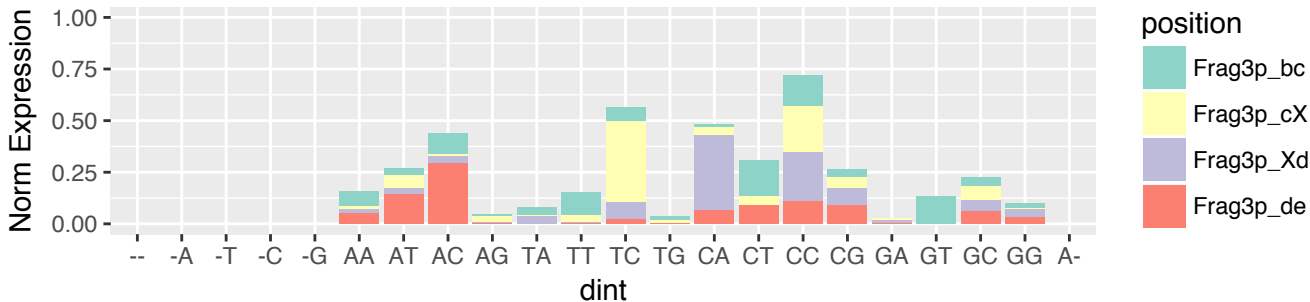

LAML (n=1909)  
 i-tRF & exclusive (n=542)  
 3' terminus relative to 5' stem of T-loop (n=150)

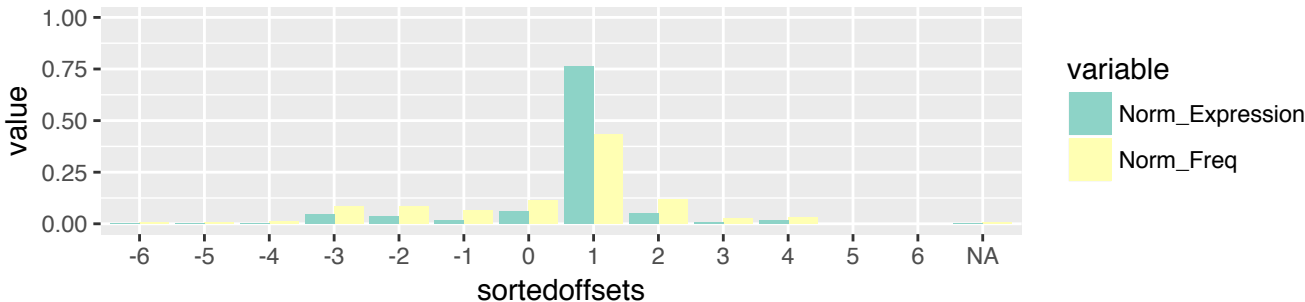

LAML (n=1909)  
 i-tRF & exclusive (n=542)  
 3' terminus relative to 5' stem of T-loop (n=150)

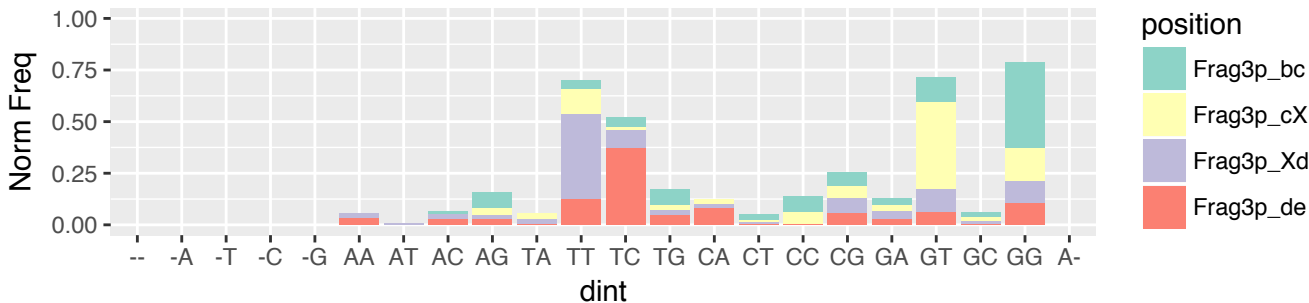

LAML (n=1909)  
 i-tRF & exclusive (n=542)  
 3' terminus relative to 5' stem of T-loop (n=150)

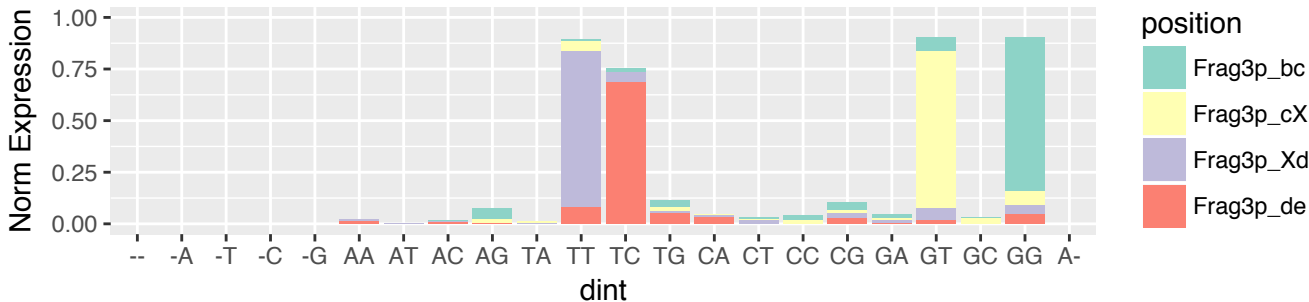



LAML (n=1909)  
i-tRF & exclusive (n=542)  
3' terminus relative to 3' stem of T-loop (n=78)

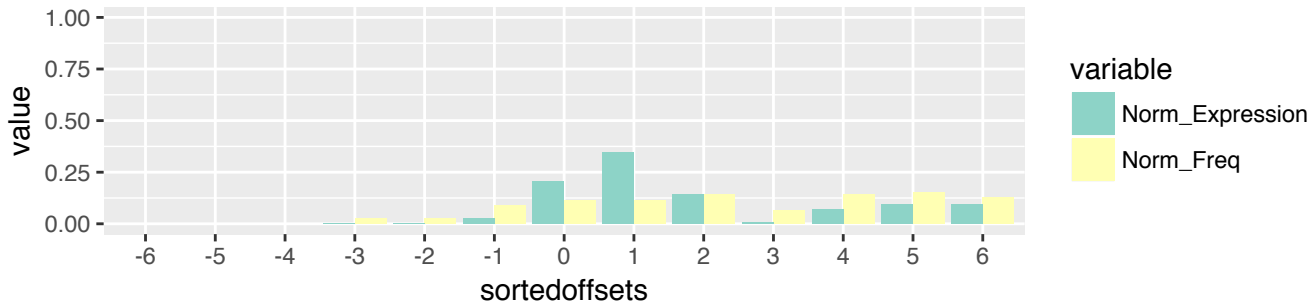

LAML (n=1909)  
i-tRF & exclusive (n=542)  
3' terminus relative to 3' stem of T-loop (n=78)

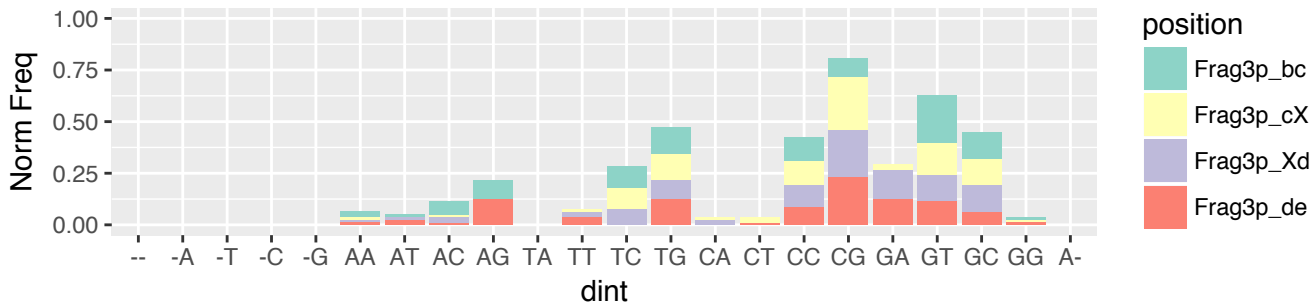

LAML (n=1909)  
i-tRF & exclusive (n=542)  
3' terminus relative to 3' stem of T-loop (n=78)

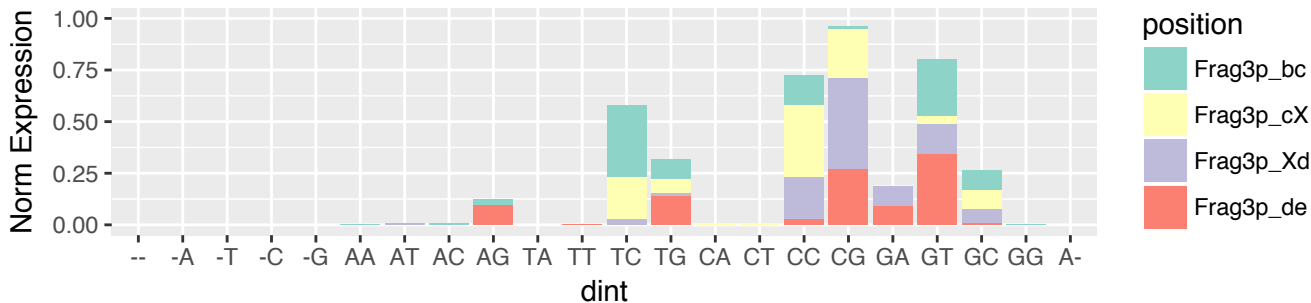

LAML (n=1909)  
 i-tRF & exclusive (n=542)  
 3' terminus relative to 3' end of the tRNA (n=47)

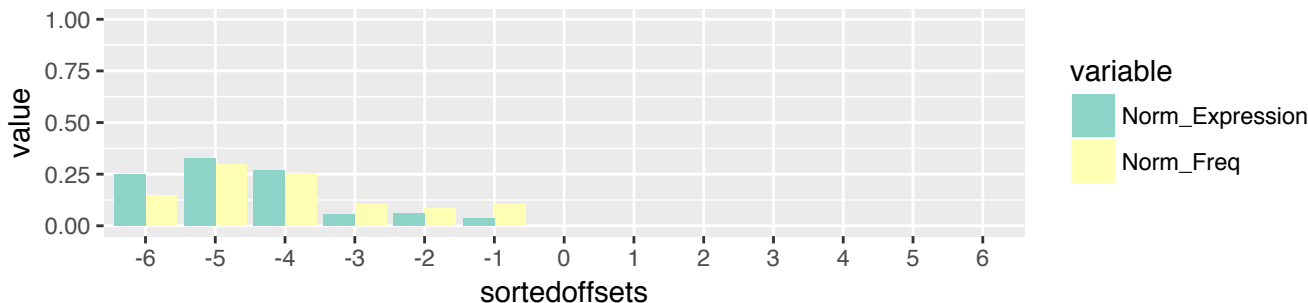

LAML (n=1909)  
 i-tRF & exclusive (n=542)  
 3' terminus relative to 3' end of the tRNA (n=47)

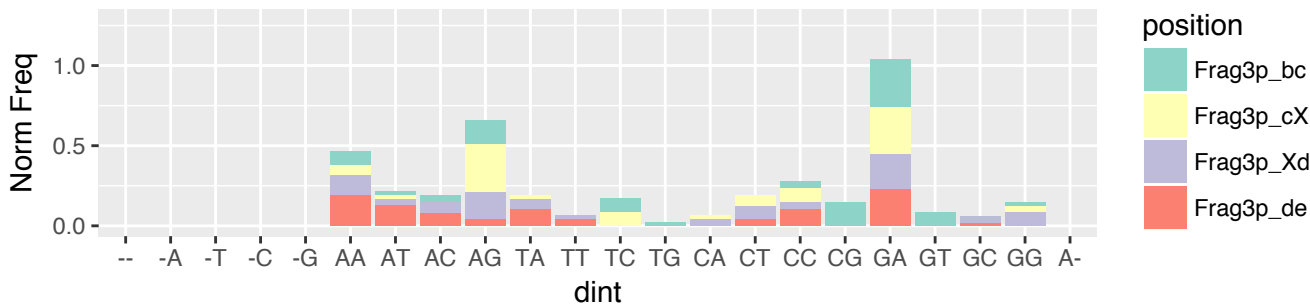

LAML (n=1909)  
 i-tRF & exclusive (n=542)  
 3' terminus relative to 3' end of the tRNA (n=47)

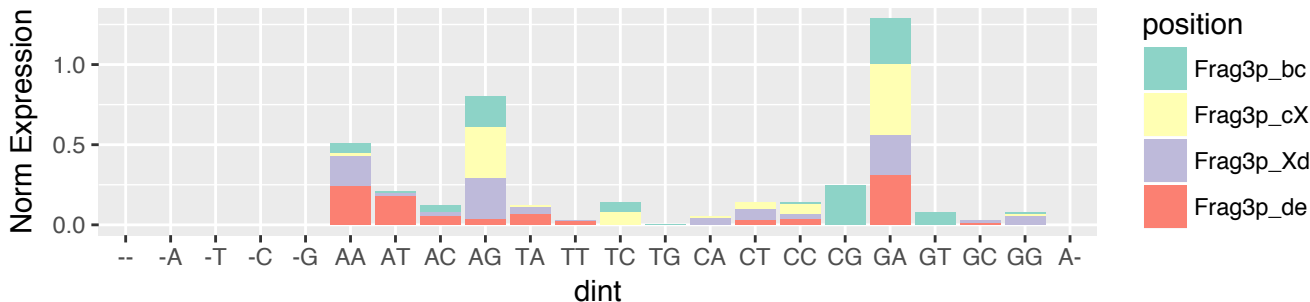

LAML (n=1909)  
 3'-tRF & exclusive (n=319)  
 5' terminus relative to 5' stem of T-loop (n=233)

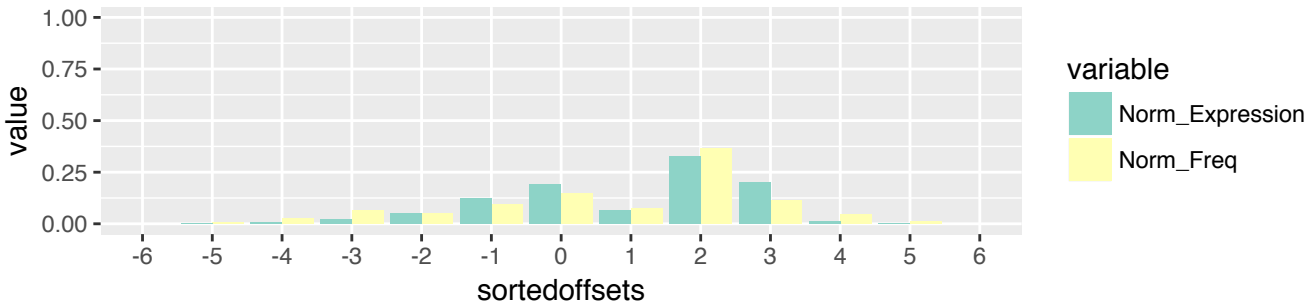

LAML (n=1909)  
 3'-tRF & exclusive (n=319)  
 5' terminus relative to 5' stem of T-loop (n=233)

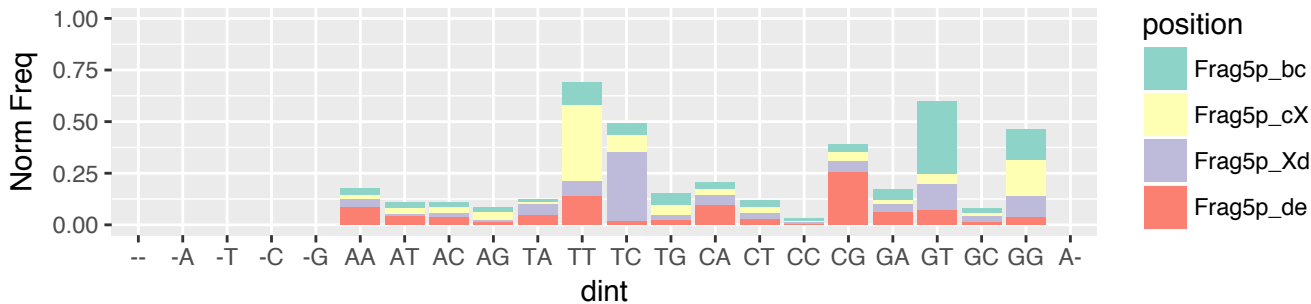

LAML (n=1909)  
 3'-tRF & exclusive (n=319)  
 5' terminus relative to 5' stem of T-loop (n=233)

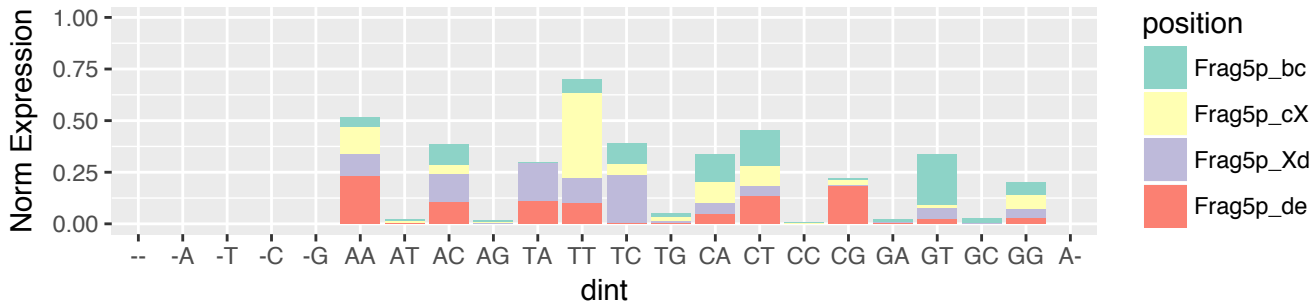

LAML (n=1909)  
 3'-tRF & exclusive (n=319)  
 5' terminus relative to 3' stem of T-loop (n=87)

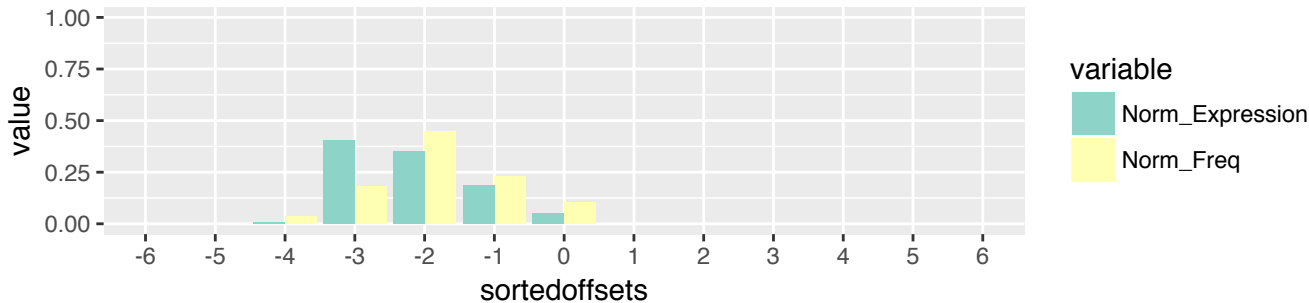

LAML (n=1909)  
 3'-tRF & exclusive (n=319)  
 5' terminus relative to 3' stem of T-loop (n=87)

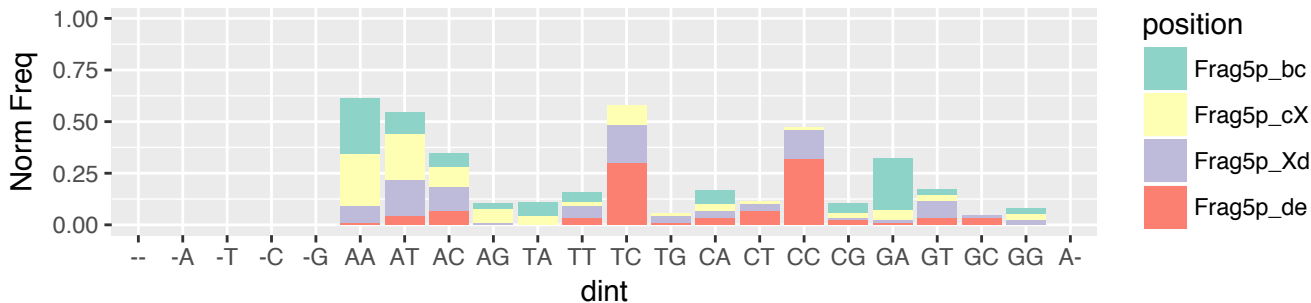

LAML (n=1909)  
 3'-tRF & exclusive (n=319)  
 5' terminus relative to 3' stem of T-loop (n=87)

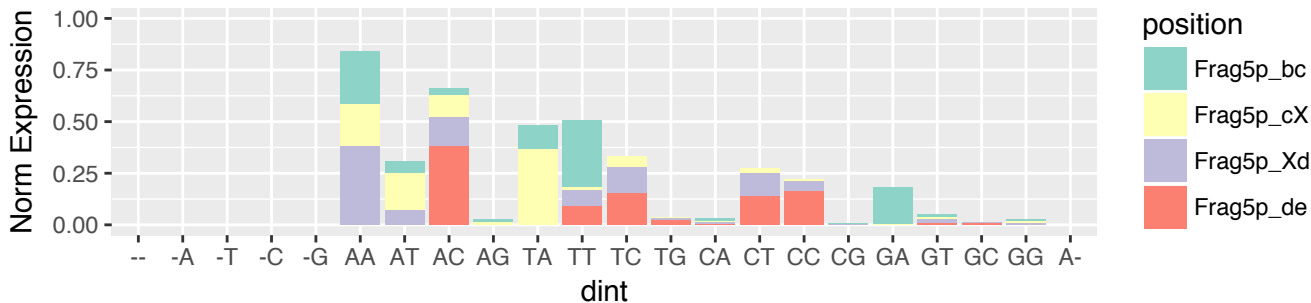

LAML (n=1909)  
 3'-tRF & exclusive (n=319)  
 3' terminus relative to 3' end of the tRNA (n=319)

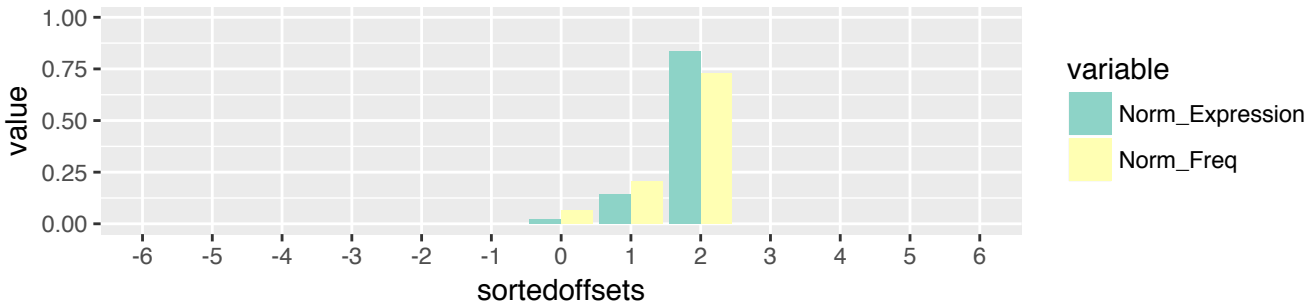

LAML (n=1909)  
 3'-tRF & exclusive (n=319)  
 3' terminus relative to 3' end of the tRNA (n=319)

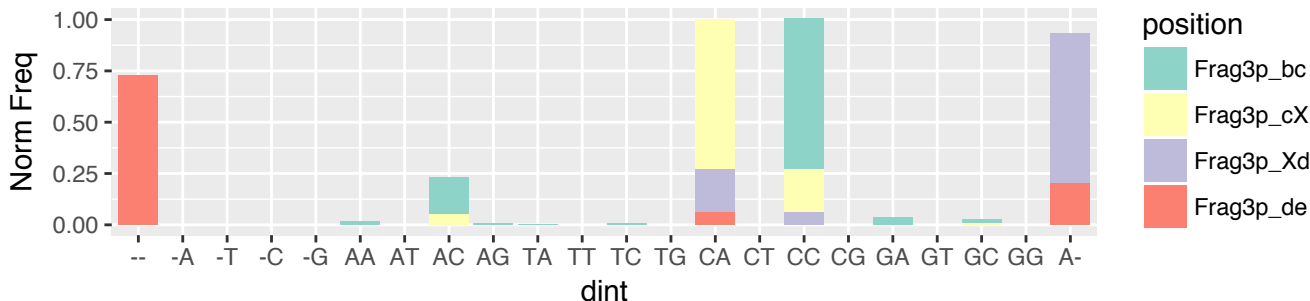

LAML (n=1909)  
 3'-tRF & exclusive (n=319)  
 3' terminus relative to 3' end of the tRNA (n=319)

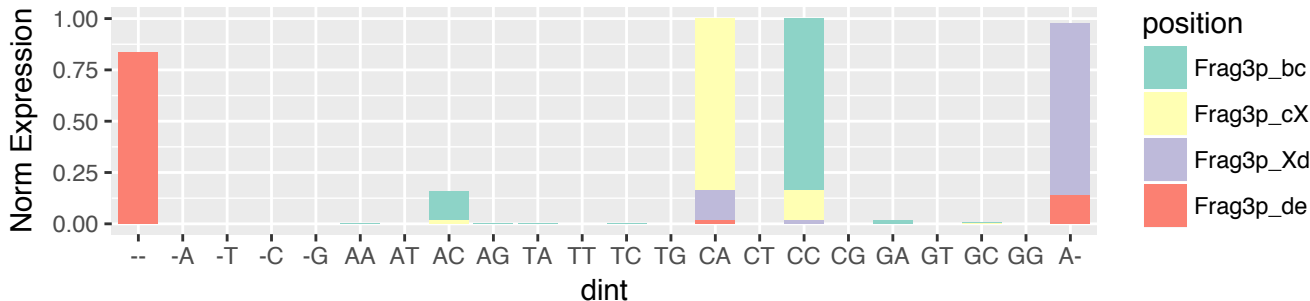

LGG (n=912)  
 5'-half & exclusive (n=3)  
 5' terminus relative to 5' end of the tRNA (n=3)



LGG (n=912)  
 5'-half & exclusive (n=3)  
 5' terminus relative to 5' end of the tRNA (n=3)

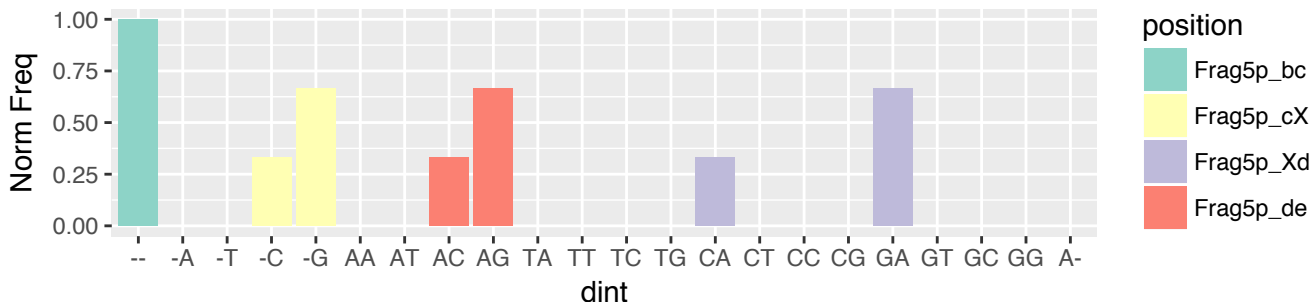

LGG (n=912)  
 5'-half & exclusive (n=3)  
 5' terminus relative to 5' end of the tRNA (n=3)

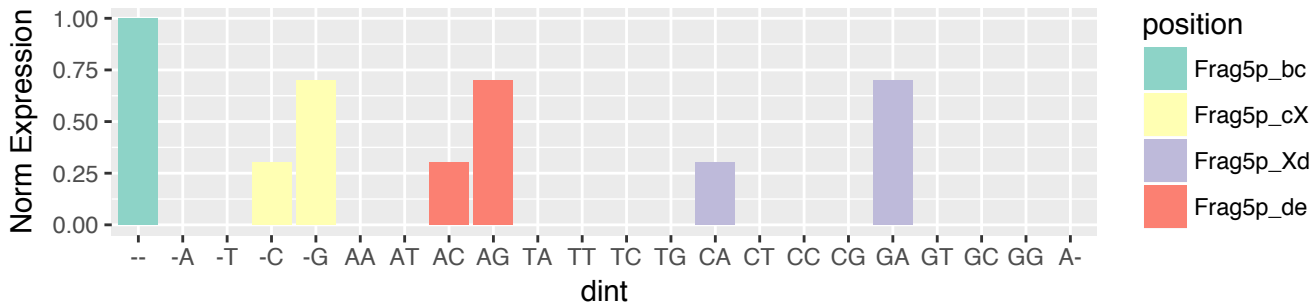

LGG (n=912)  
 5'-half & exclusive (n=3)  
 3' terminus relative to 5' stem of A-loop (n=3)

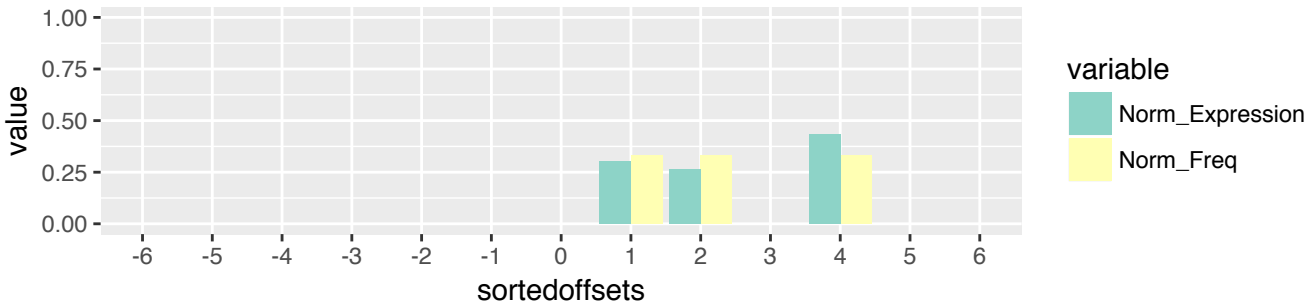

LGG (n=912)  
 5'-half & exclusive (n=3)  
 3' terminus relative to 5' stem of A-loop (n=3)

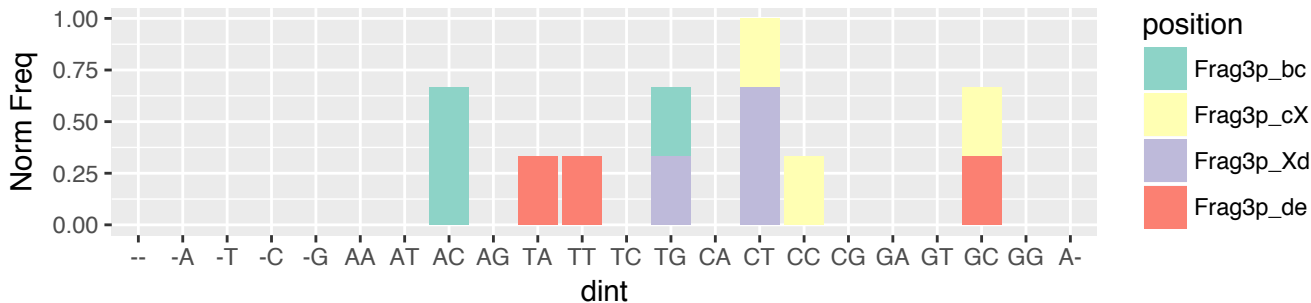

LGG (n=912)  
 5'-half & exclusive (n=3)  
 3' terminus relative to 5' stem of A-loop (n=3)

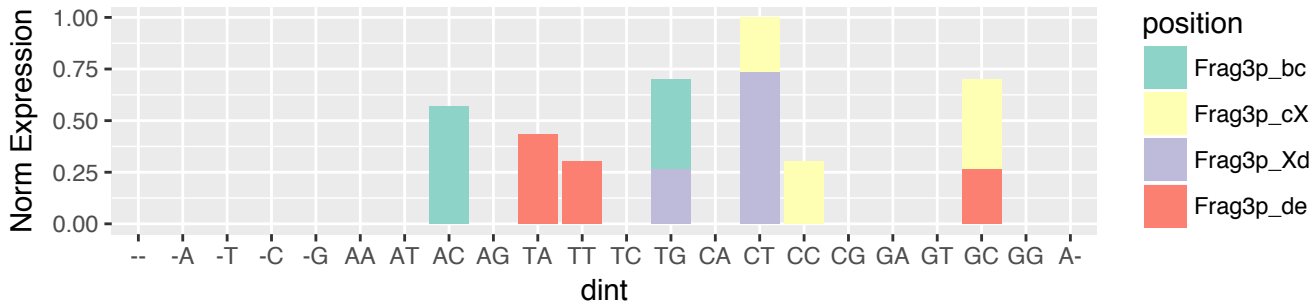

LGG (n=912)  
 5'-tRF & exclusive (n=135)  
 5' terminus relative to 5' end of the tRNA (n=135)

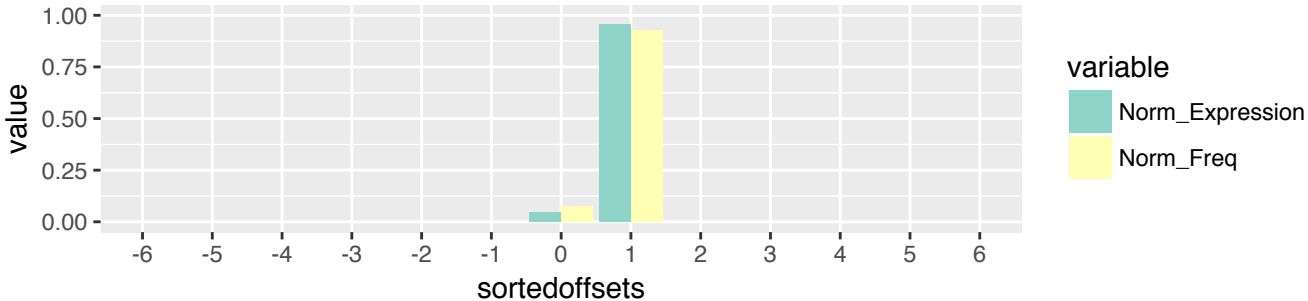

LGG (n=912)  
 5'-tRF & exclusive (n=135)  
 5' terminus relative to 5' end of the tRNA (n=135)

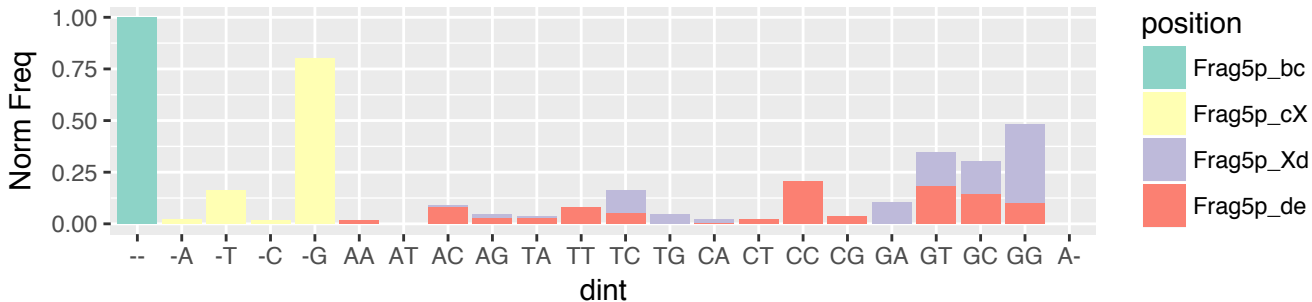

LGG (n=912)  
 5'-tRF & exclusive (n=135)  
 5' terminus relative to 5' end of the tRNA (n=135)

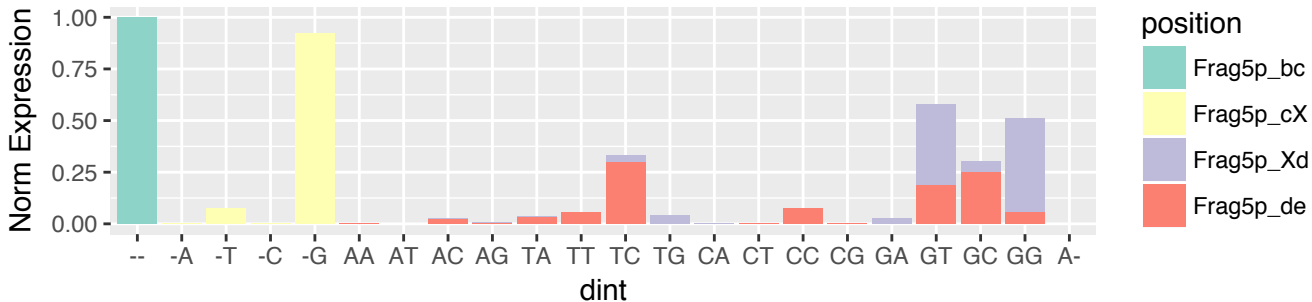



LGG (n=912)  
 5'-tRF & exclusive (n=135)  
 3' terminus relative to 5' stem of D-loop (n=7)

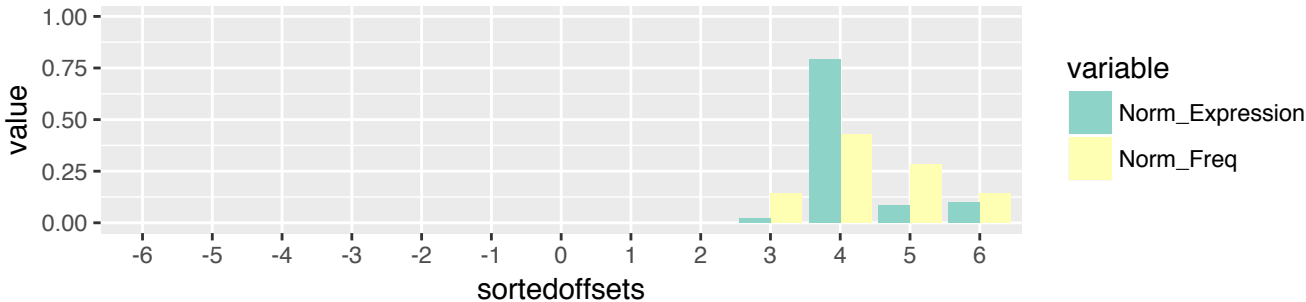

LGG (n=912)  
 5'-tRF & exclusive (n=135)  
 3' terminus relative to 5' stem of D-loop (n=7)

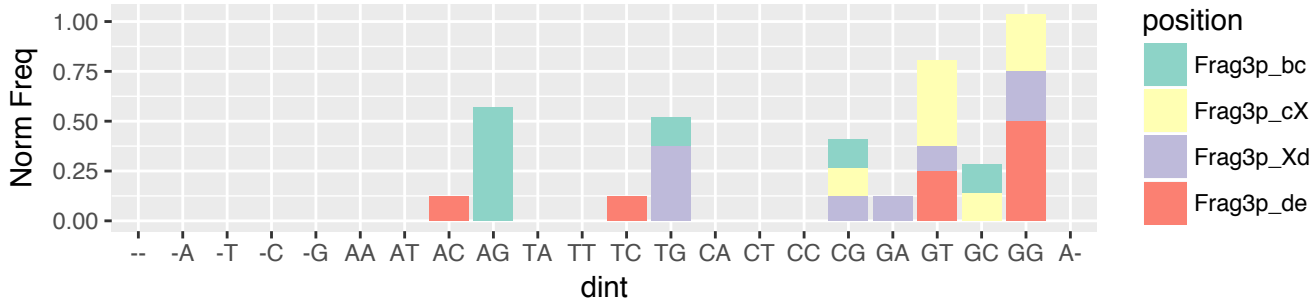

LGG (n=912)  
 5'-tRF & exclusive (n=135)  
 3' terminus relative to 5' stem of D-loop (n=7)

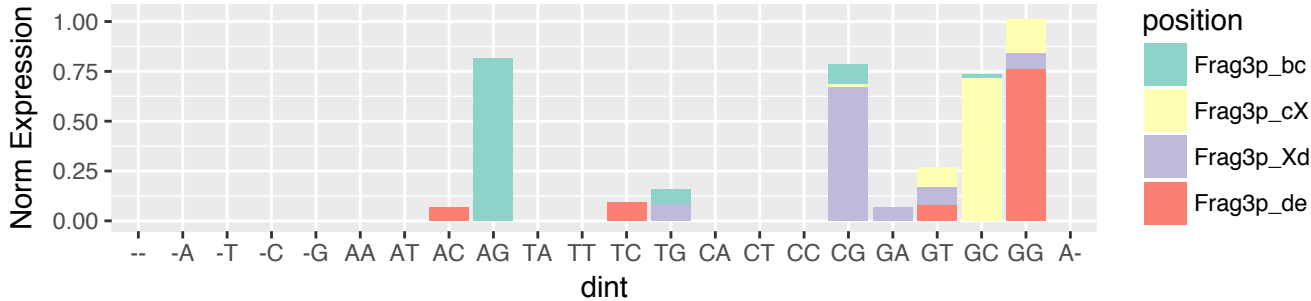

LGG (n=912)  
 5'-tRF & exclusive (n=135)  
 3' terminus relative to 3' stem of D-loop (n=119)

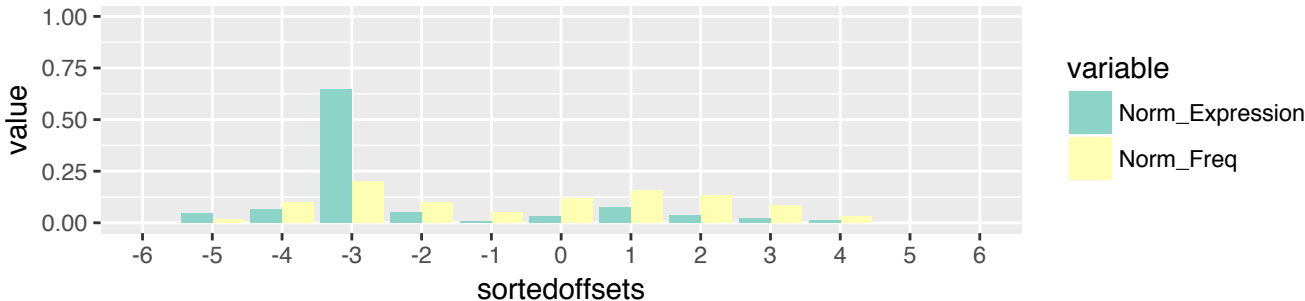

LGG (n=912)  
 5'-tRF & exclusive (n=135)  
 3' terminus relative to 3' stem of D-loop (n=119)

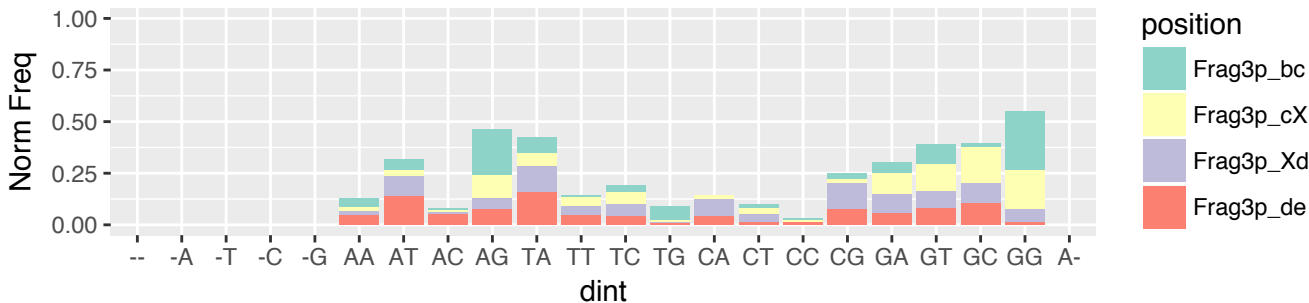

LGG (n=912)  
 5'-tRF & exclusive (n=135)  
 3' terminus relative to 3' stem of D-loop (n=119)

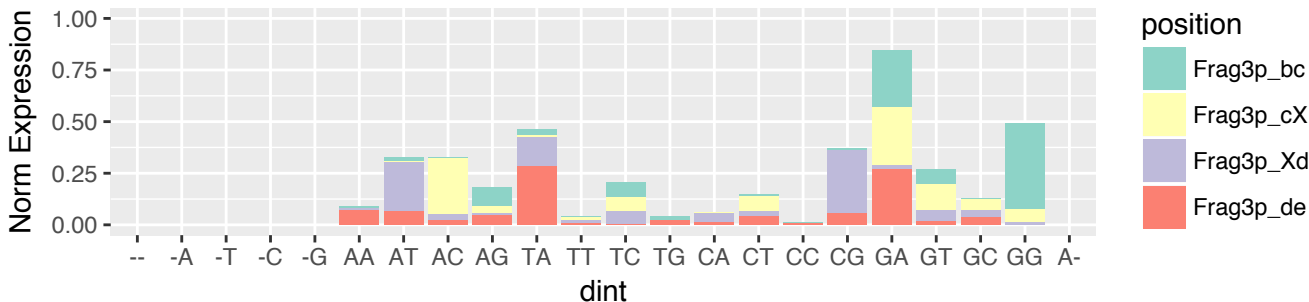

LGG (n=912)  
 5'-tRF & exclusive (n=135)  
 3' terminus relative to 5' stem of A-loop (n=6)

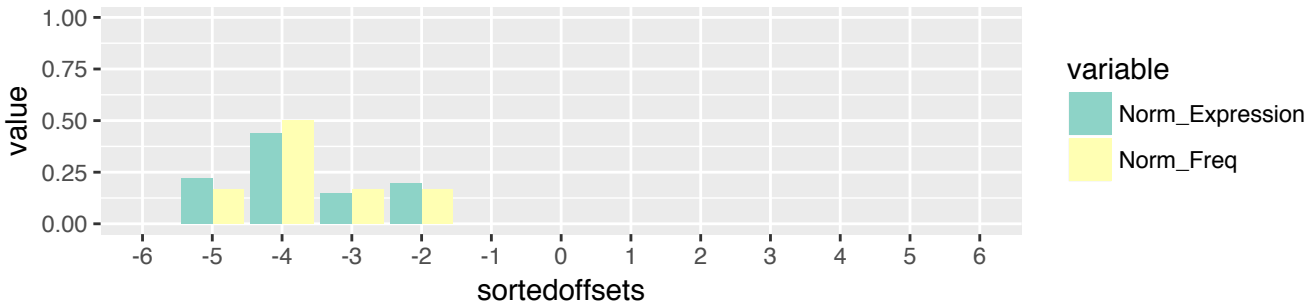

LGG (n=912)  
 5'-tRF & exclusive (n=135)  
 3' terminus relative to 5' stem of A-loop (n=6)

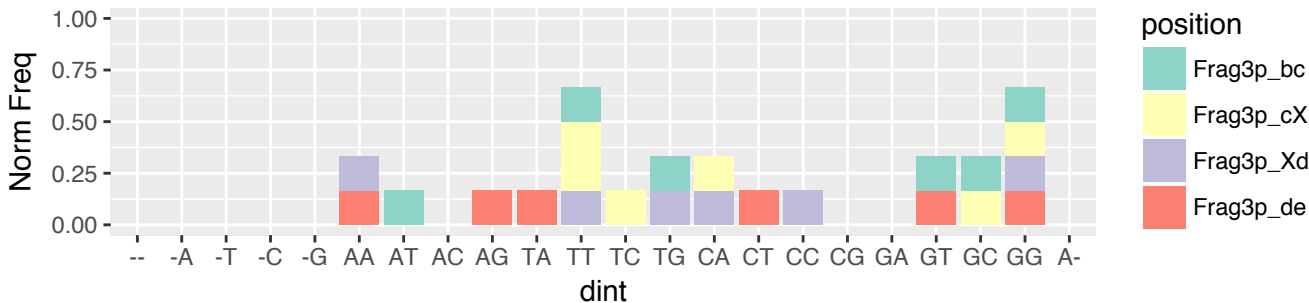

LGG (n=912)  
 5'-tRF & exclusive (n=135)  
 3' terminus relative to 5' stem of A-loop (n=6)

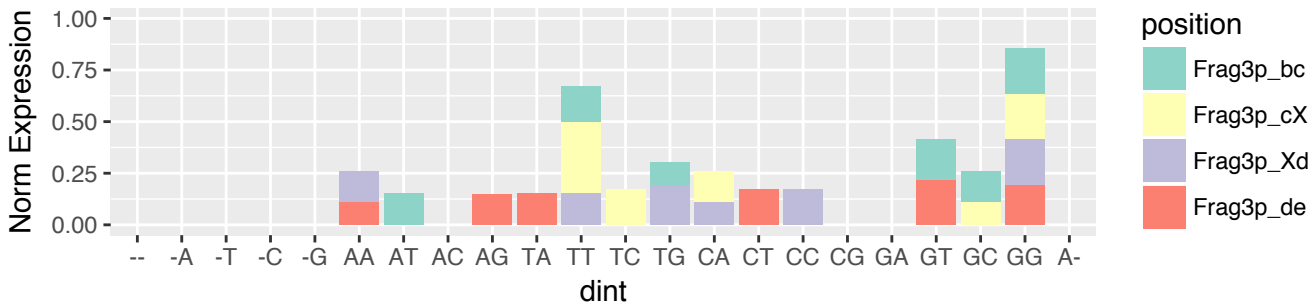

LGG (n=912)  
 5'-tRF & exclusive (n=135)  
 3' terminus relative to 3' stem of A-loop (n=3)

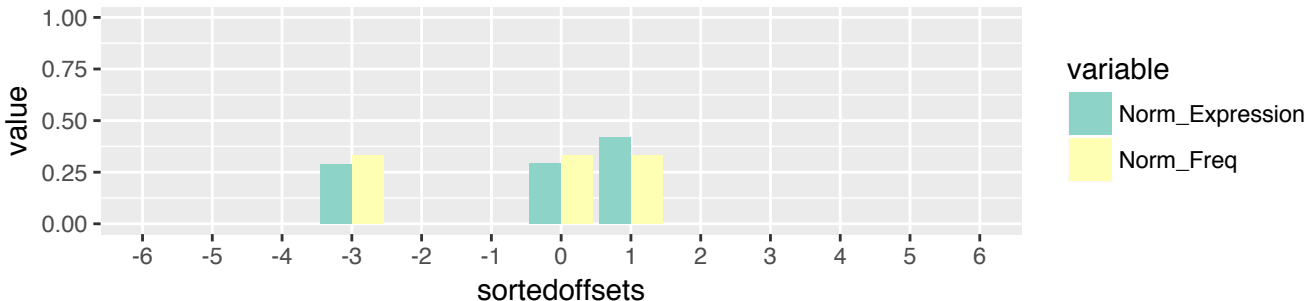

LGG (n=912)  
 5'-tRF & exclusive (n=135)  
 3' terminus relative to 3' stem of A-loop (n=3)

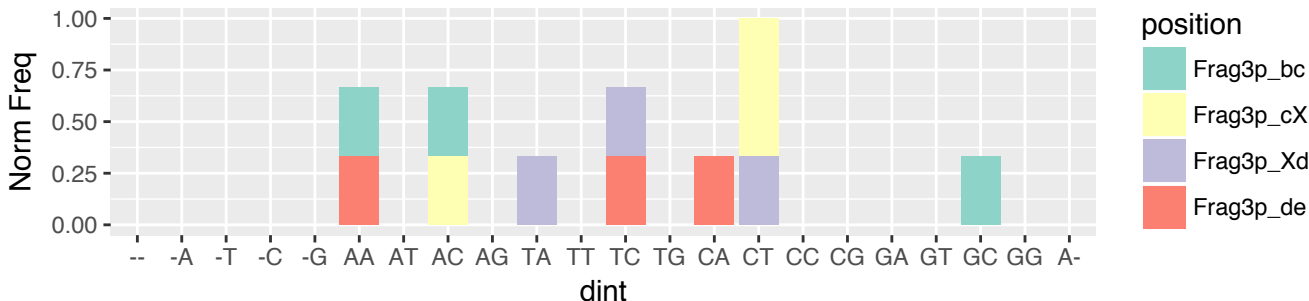

LGG (n=912)  
 5'-tRF & exclusive (n=135)  
 3' terminus relative to 3' stem of A-loop (n=3)

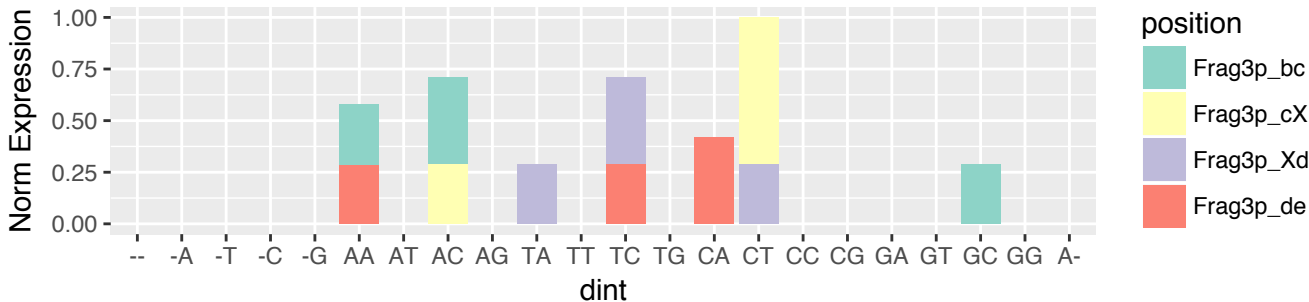

LGG (n=912)  
 i-tRF & exclusive (n=204)  
 5' terminus relative to 5' end of the tRNA (n=9)

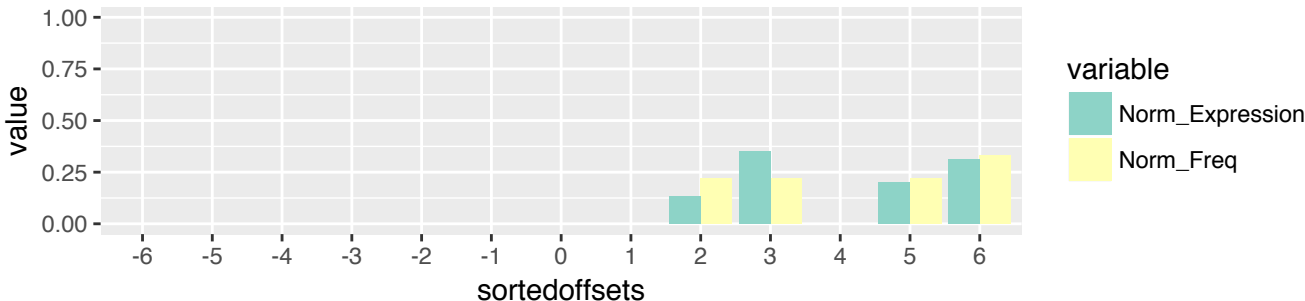

LGG (n=912)  
 i-tRF & exclusive (n=204)  
 5' terminus relative to 5' end of the tRNA (n=9)

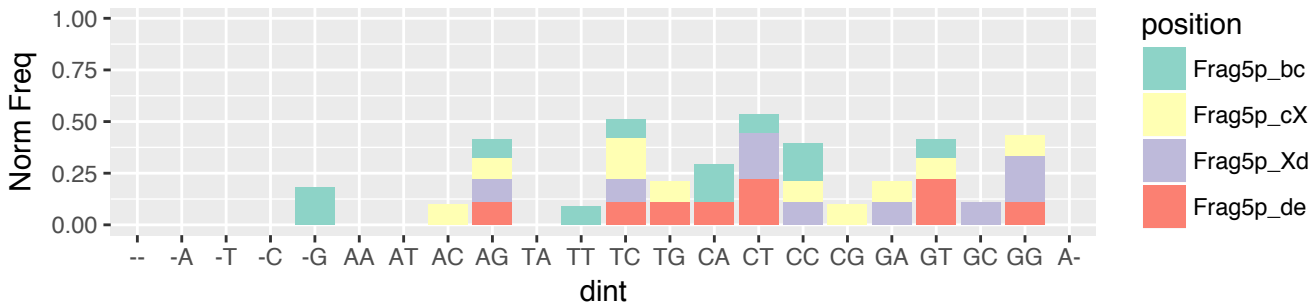

LGG (n=912)  
 i-tRF & exclusive (n=204)  
 5' terminus relative to 5' end of the tRNA (n=9)

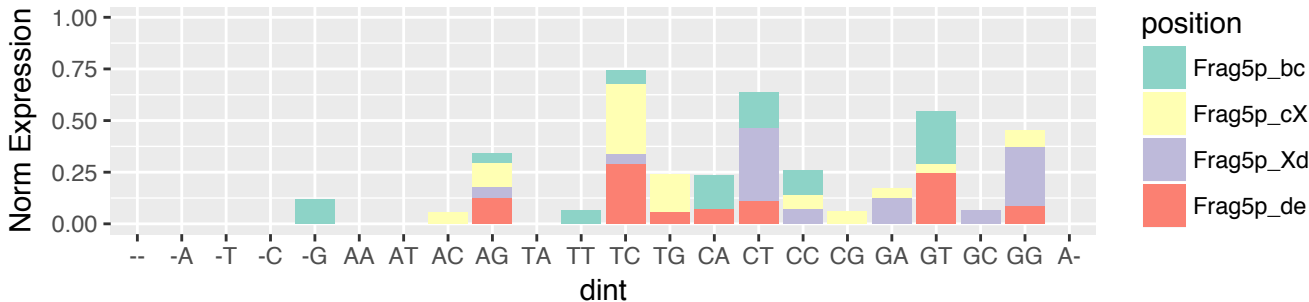

LGG (n=912)  
i-tRF & exclusive (n=204)  
5' terminus relative to 5' stem of D-loop (n=76)

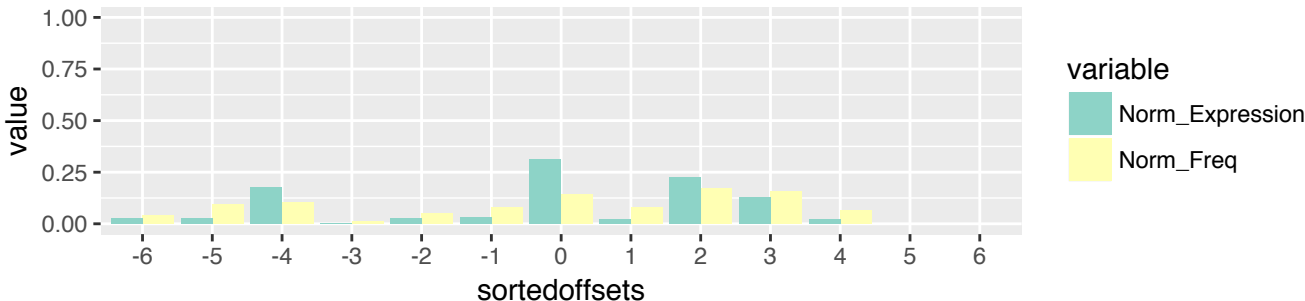

LGG (n=912)  
i-tRF & exclusive (n=204)  
5' terminus relative to 5' stem of D-loop (n=76)

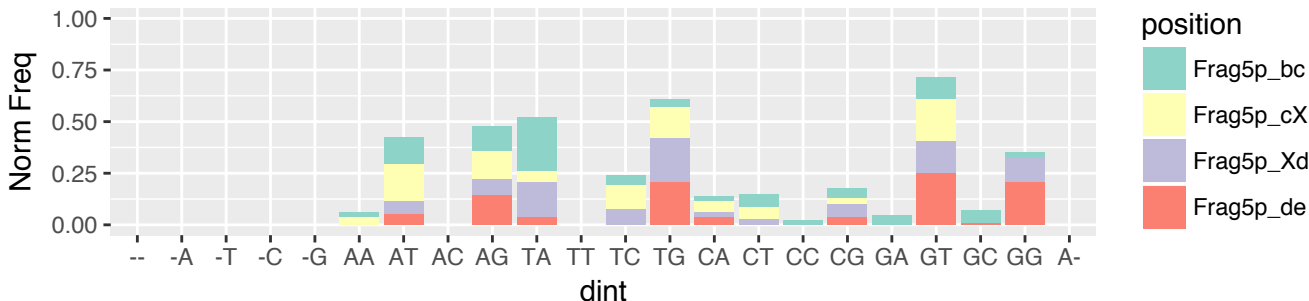

LGG (n=912)  
i-tRF & exclusive (n=204)  
5' terminus relative to 5' stem of D-loop (n=76)

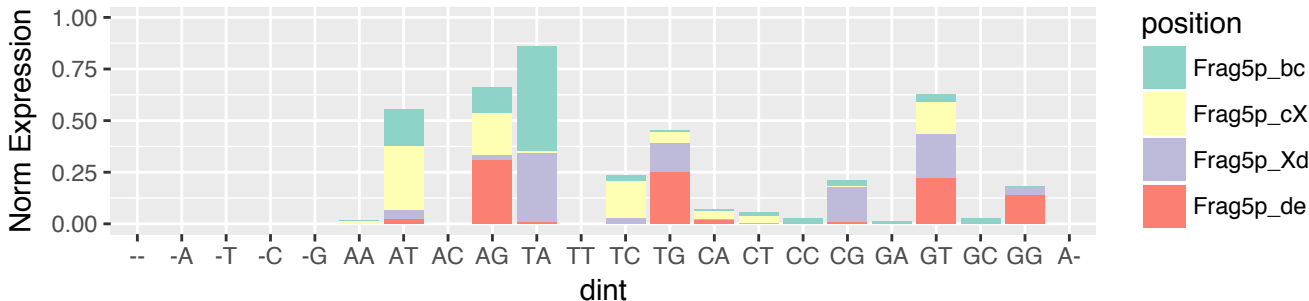

LGG (n=912)  
 i-tRF & exclusive (n=204)  
 5' terminus relative to 3' stem of D-loop (n=8)

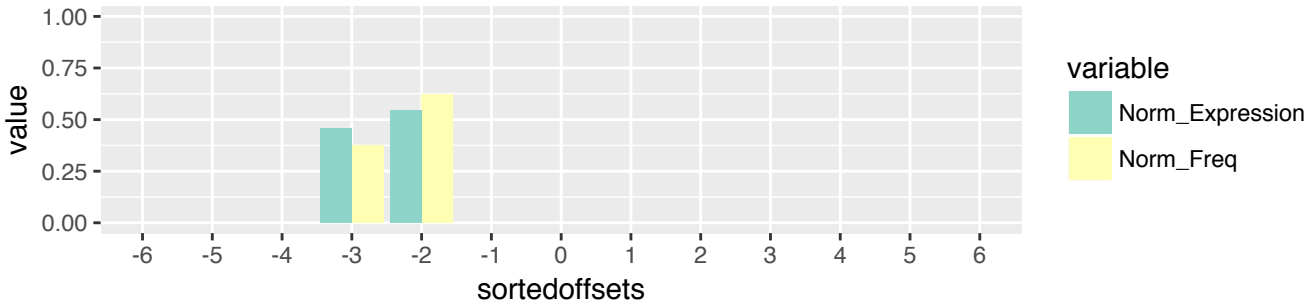

LGG (n=912)  
 i-tRF & exclusive (n=204)  
 5' terminus relative to 3' stem of D-loop (n=8)

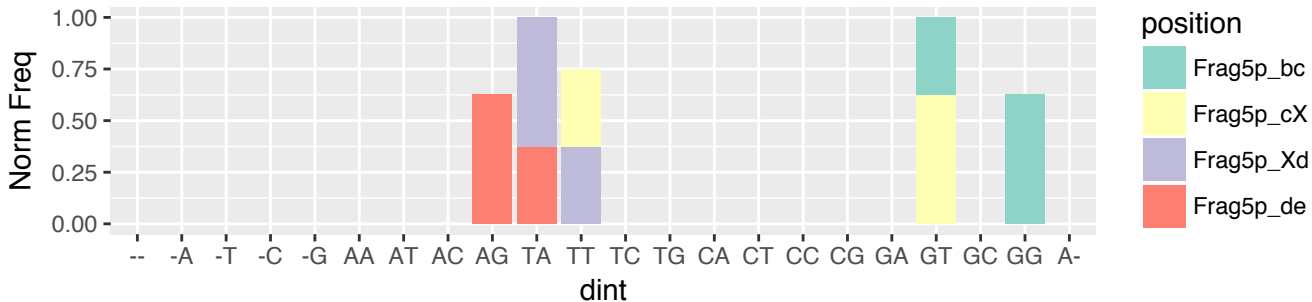

LGG (n=912)  
 i-tRF & exclusive (n=204)  
 5' terminus relative to 3' stem of D-loop (n=8)

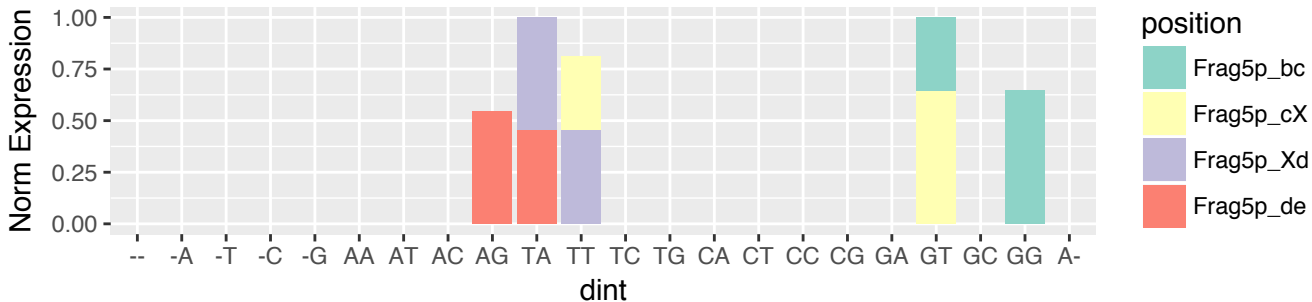

LGG (n=912)  
 i-tRF & exclusive (n=204)  
 5' terminus relative to 5' stem of A-loop (n=47)

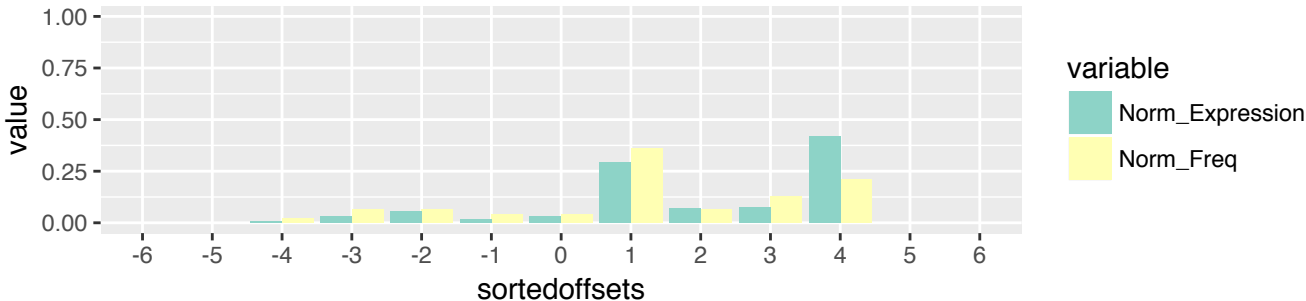

LGG (n=912)  
 i-tRF & exclusive (n=204)  
 5' terminus relative to 5' stem of A-loop (n=47)

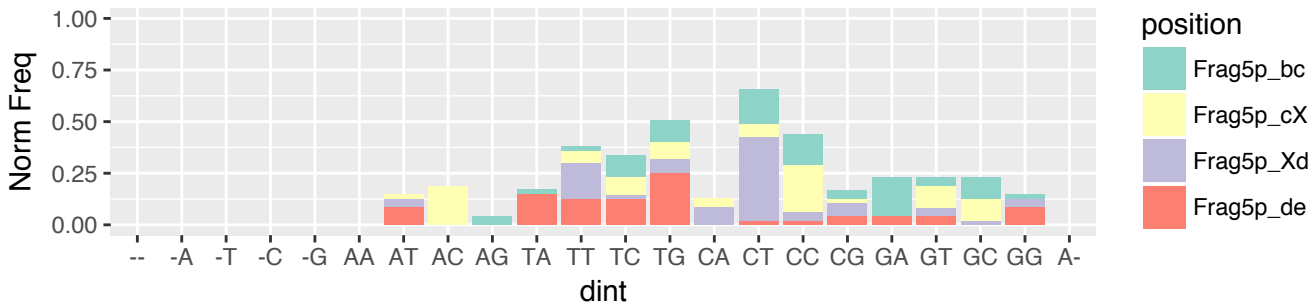

LGG (n=912)  
 i-tRF & exclusive (n=204)  
 5' terminus relative to 5' stem of A-loop (n=47)

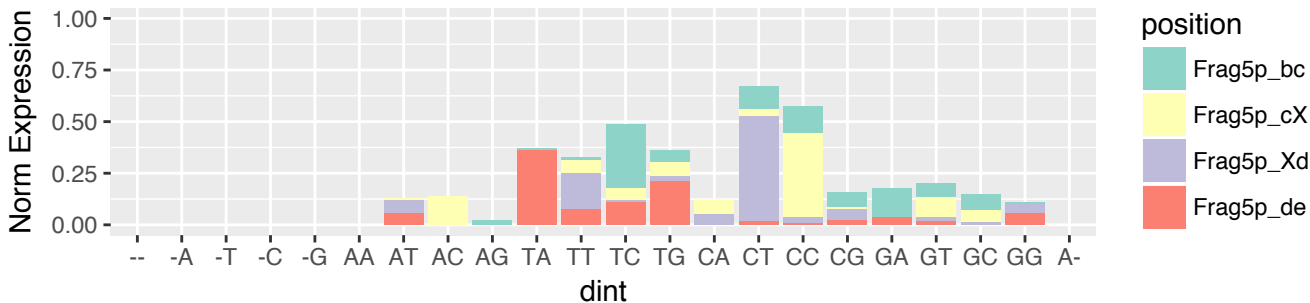



LGG (n=912)  
i-tRF & exclusive (n=204)  
5' terminus relative to 3' stem of A-loop (n=60)

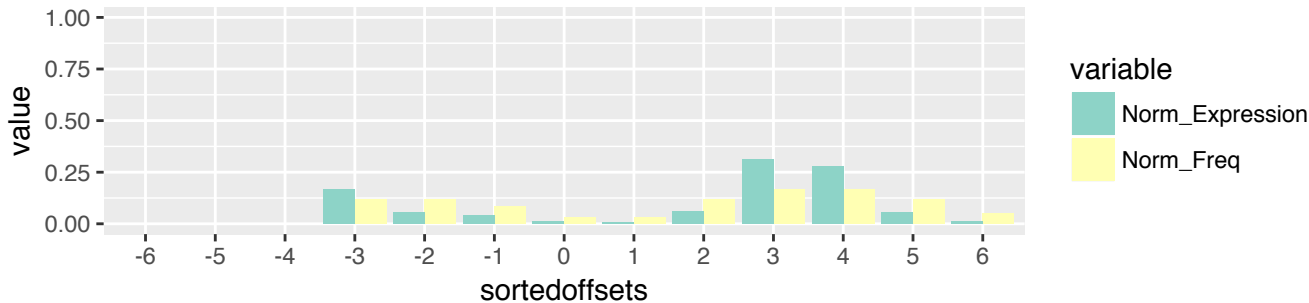

LGG (n=912)  
i-tRF & exclusive (n=204)  
5' terminus relative to 3' stem of A-loop (n=60)

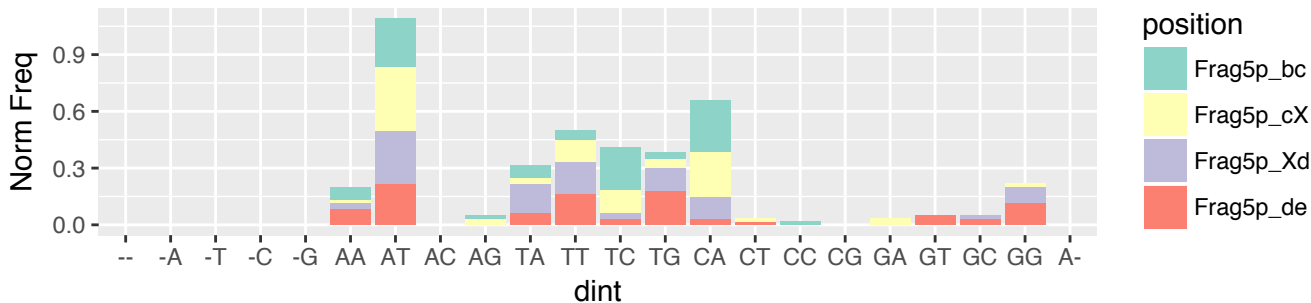

LGG (n=912)  
i-tRF & exclusive (n=204)  
5' terminus relative to 3' stem of A-loop (n=60)

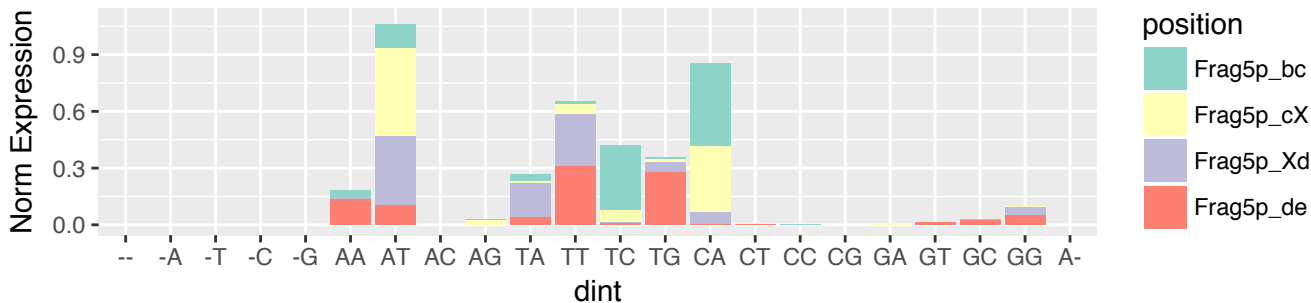

LGG (n=912)  
 i-tRF & exclusive (n=204)  
 5' terminus relative to 5' stem of T-loop (n=4)

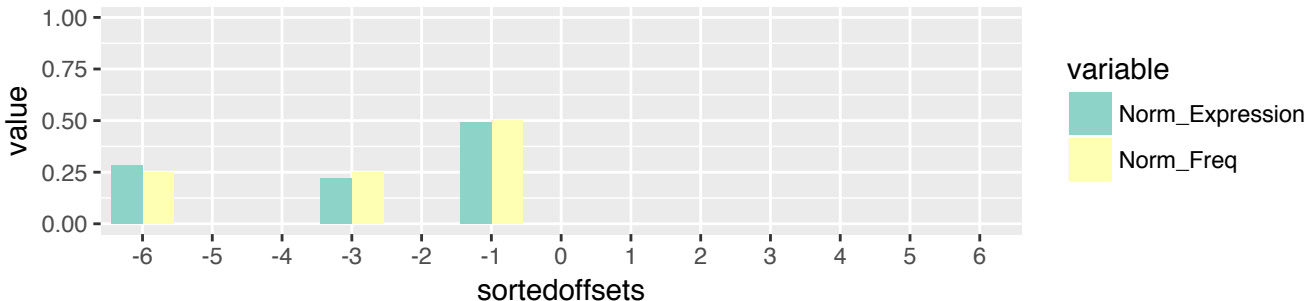

LGG (n=912)  
 i-tRF & exclusive (n=204)  
 5' terminus relative to 5' stem of T-loop (n=4)

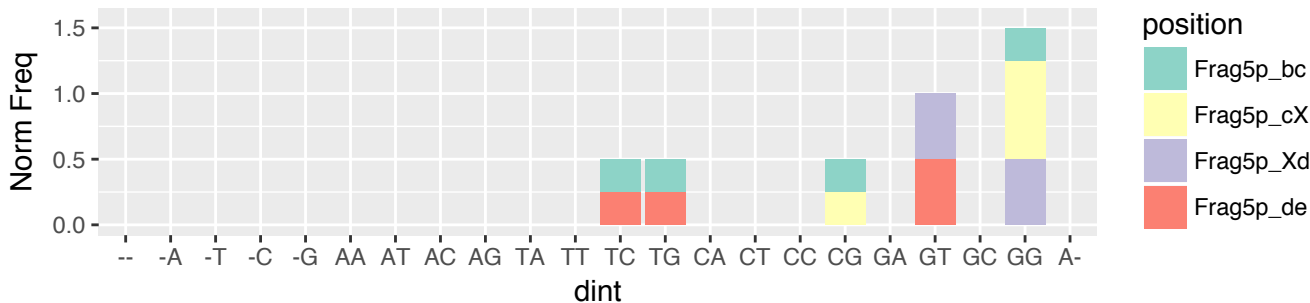

LGG (n=912)  
 i-tRF & exclusive (n=204)  
 5' terminus relative to 5' stem of T-loop (n=4)

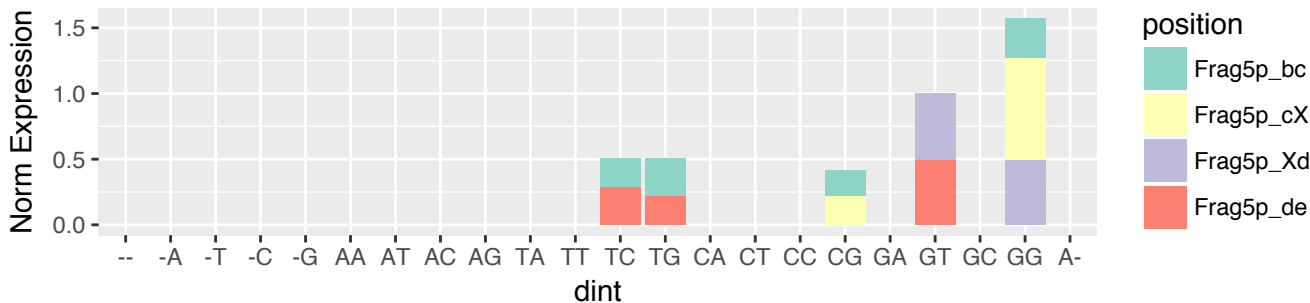

LGG (n=912)  
i-tRF & exclusive (n=204)  
3' terminus relative to 3' stem of D-loop (n=3)

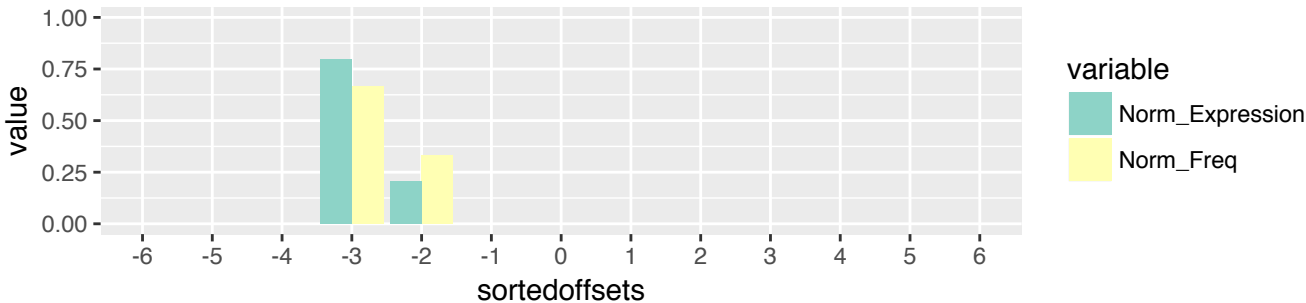

LGG (n=912)  
i-tRF & exclusive (n=204)  
3' terminus relative to 3' stem of D-loop (n=3)

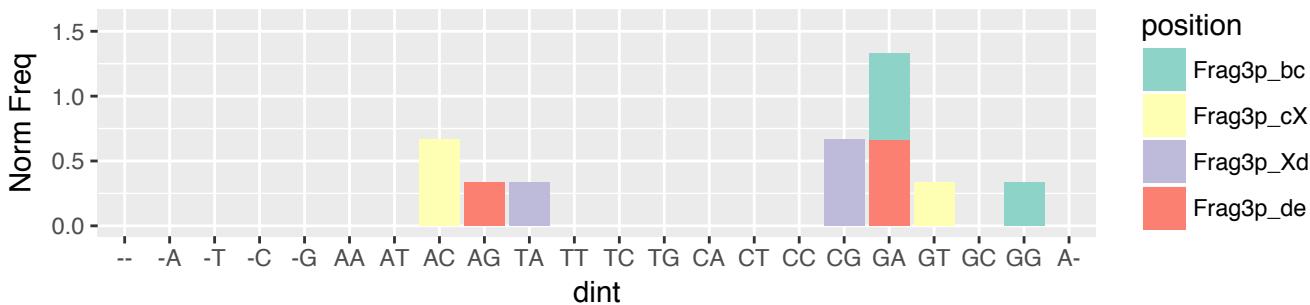

LGG (n=912)  
i-tRF & exclusive (n=204)  
3' terminus relative to 3' stem of D-loop (n=3)

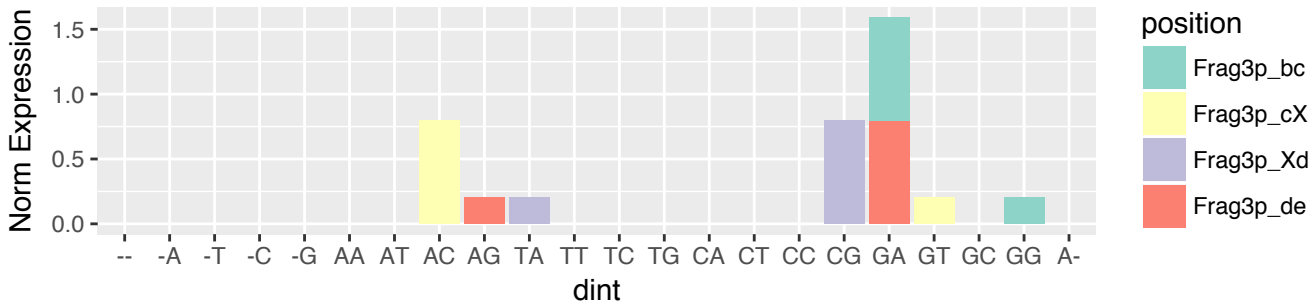

LGG (n=912)  
i-tRF & exclusive (n=204)  
3' terminus relative to 5' stem of A-loop (n=66)

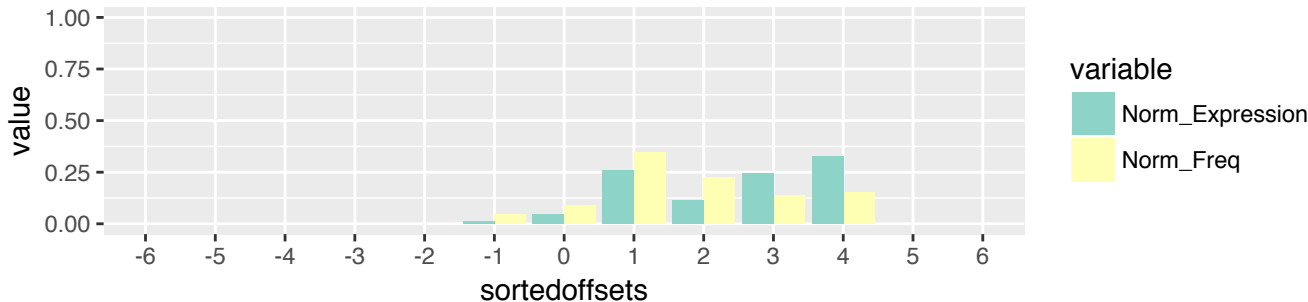

LGG (n=912)  
i-tRF & exclusive (n=204)  
3' terminus relative to 5' stem of A-loop (n=66)

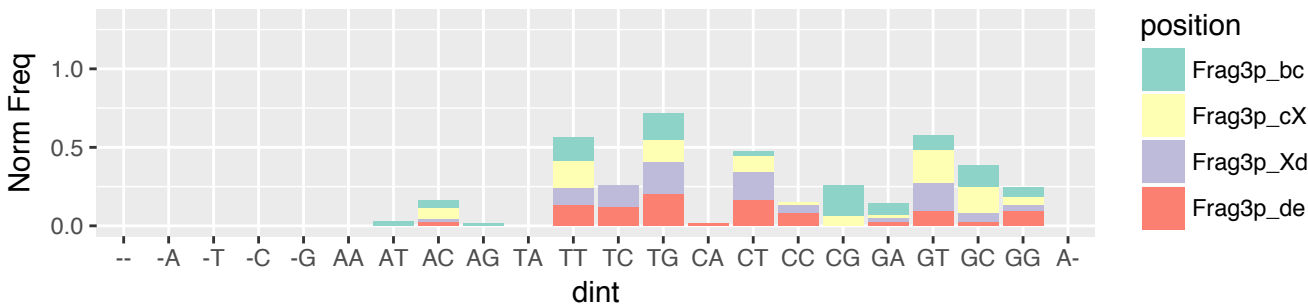

LGG (n=912)  
i-tRF & exclusive (n=204)  
3' terminus relative to 5' stem of A-loop (n=66)

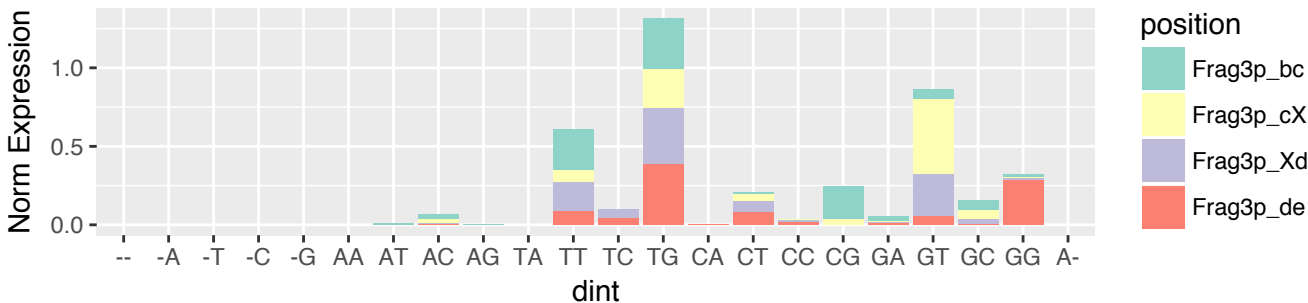

LGG (n=912)  
 i-tRF & exclusive (n=204)  
 3' terminus relative to 3' stem of A-loop (n=30)

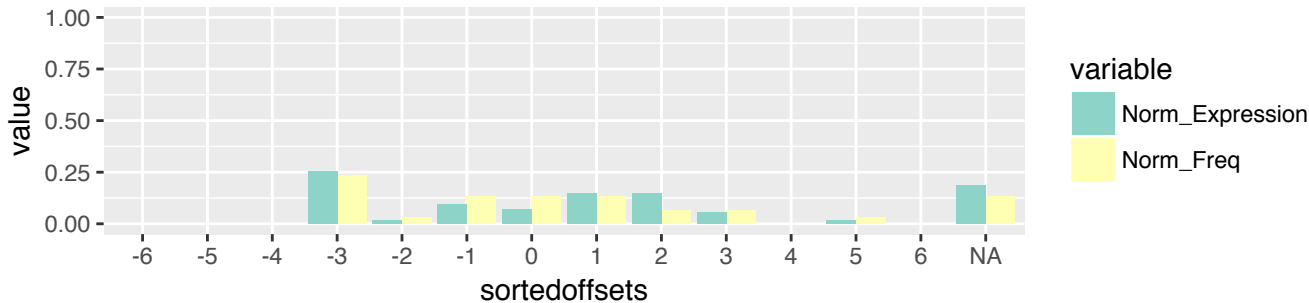

LGG (n=912)  
 i-tRF & exclusive (n=204)  
 3' terminus relative to 3' stem of A-loop (n=30)

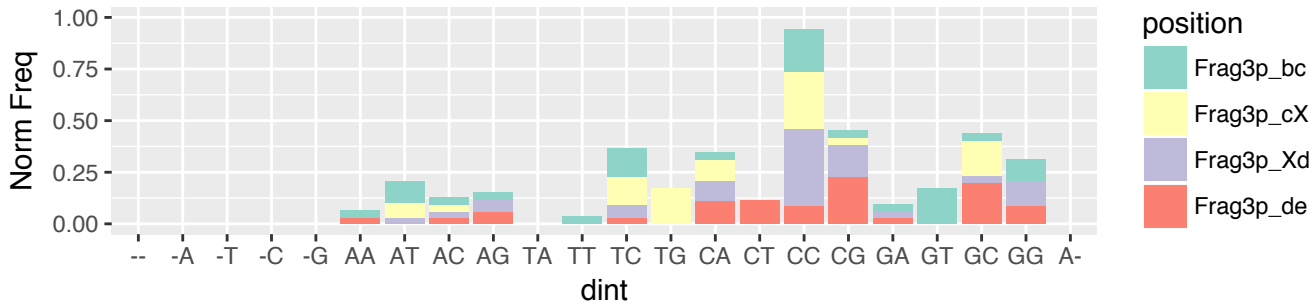

LGG (n=912)  
 i-tRF & exclusive (n=204)  
 3' terminus relative to 3' stem of A-loop (n=30)

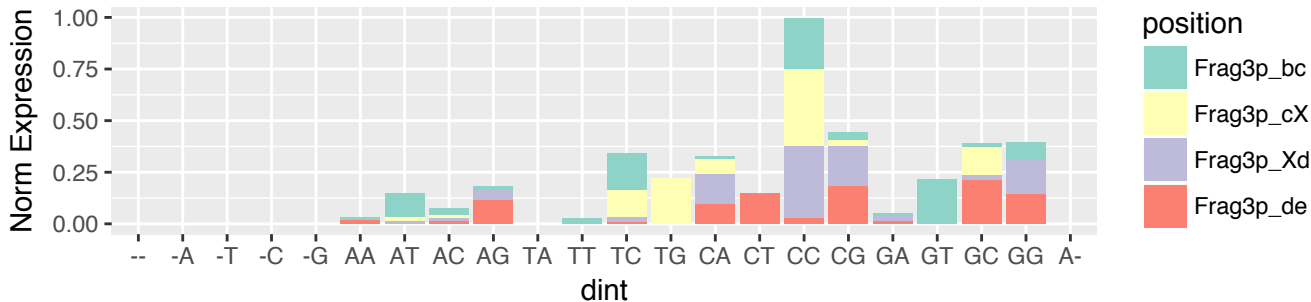

LGG (n=912)  
i-tRF & exclusive (n=204)  
3' terminus relative to 5' stem of T-loop (n=46)

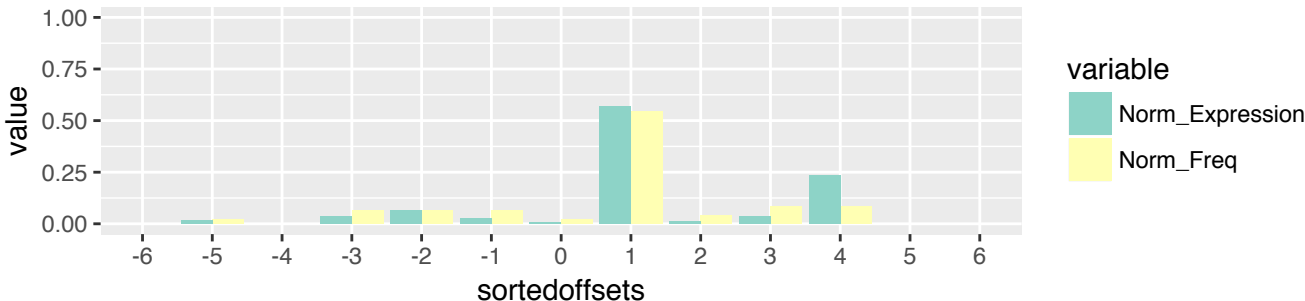

LGG (n=912)  
i-tRF & exclusive (n=204)  
3' terminus relative to 5' stem of T-loop (n=46)

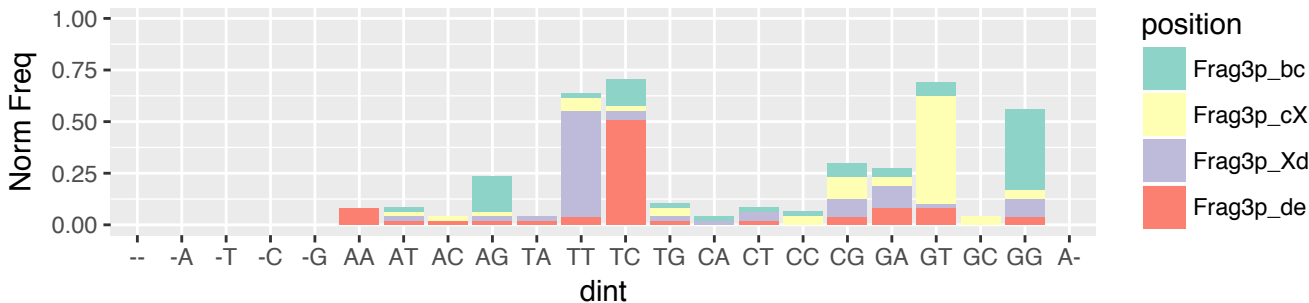

LGG (n=912)  
i-tRF & exclusive (n=204)  
3' terminus relative to 5' stem of T-loop (n=46)

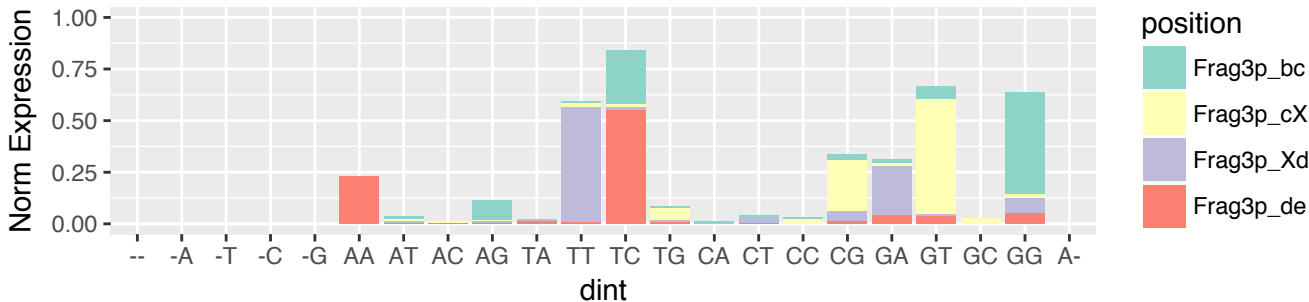

LGG (n=912)  
i-tRF & exclusive (n=204)  
3' terminus relative to 3' stem of T-loop (n=48)

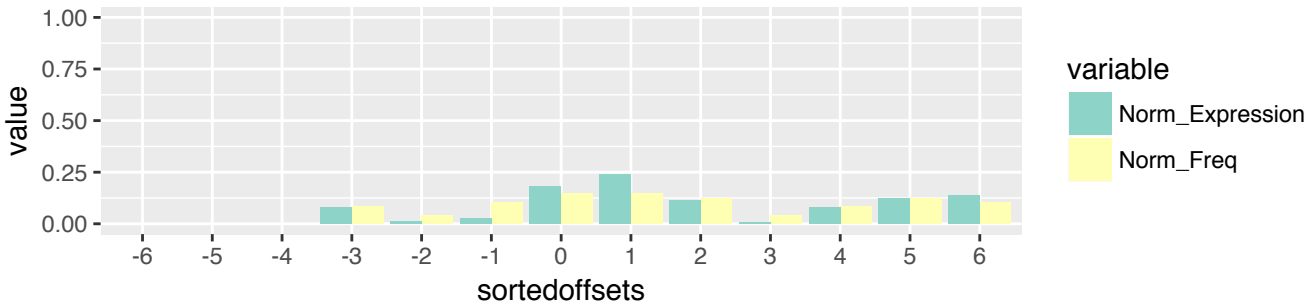

LGG (n=912)  
i-tRF & exclusive (n=204)  
3' terminus relative to 3' stem of T-loop (n=48)

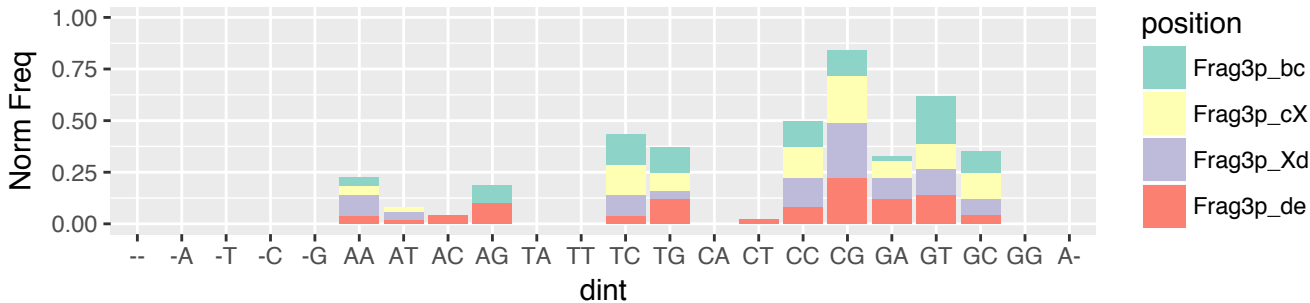

LGG (n=912)  
i-tRF & exclusive (n=204)  
3' terminus relative to 3' stem of T-loop (n=48)

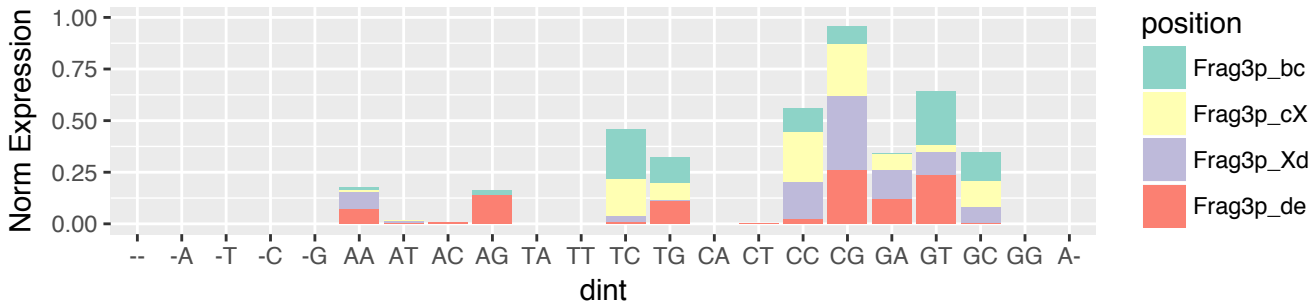

LGG (n=912)  
i-tRF & exclusive (n=204)  
3' terminus relative to 3' end of the tRNA (n=12)

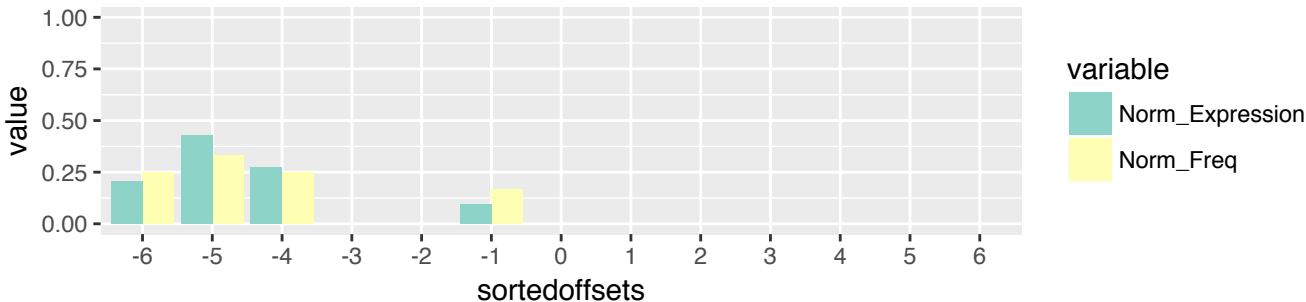

LGG (n=912)  
i-tRF & exclusive (n=204)  
3' terminus relative to 3' end of the tRNA (n=12)

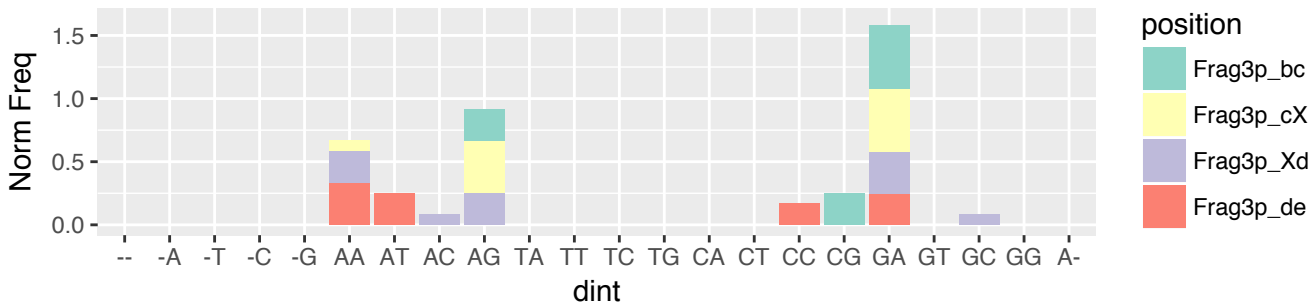

LGG (n=912)  
i-tRF & exclusive (n=204)  
3' terminus relative to 3' end of the tRNA (n=12)

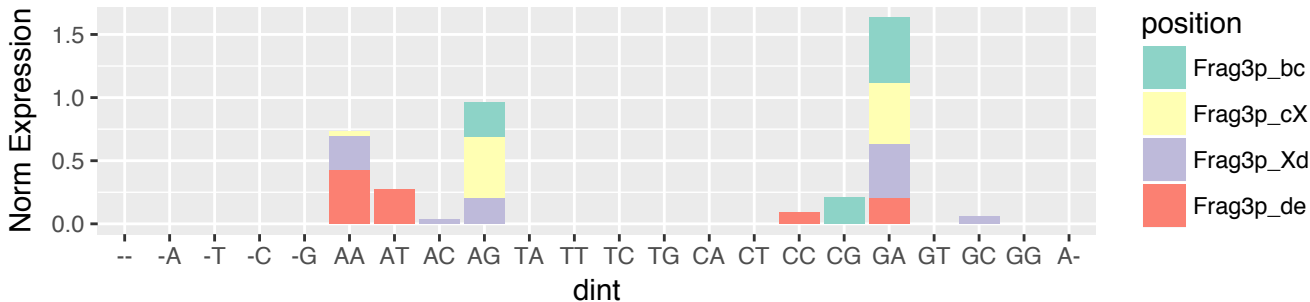



LGG (n=912)  
 3'-tRF & exclusive (n=159)  
 5' terminus relative to 5' stem of T-loop (n=110)

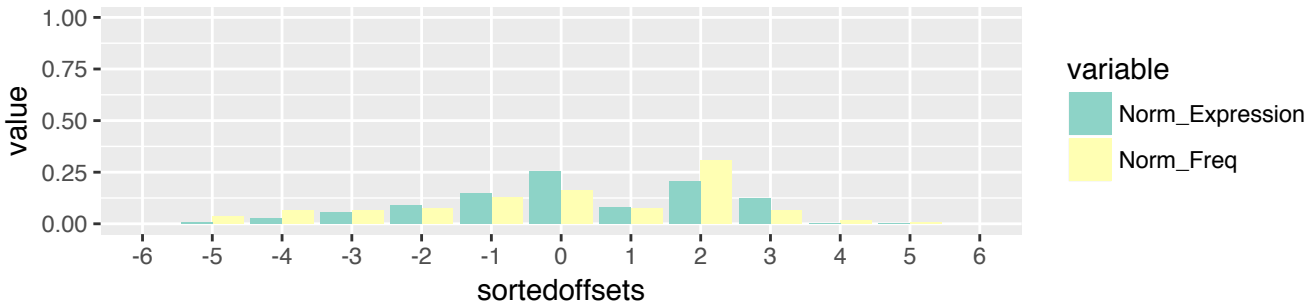

LGG (n=912)  
 3'-tRF & exclusive (n=159)  
 5' terminus relative to 5' stem of T-loop (n=110)

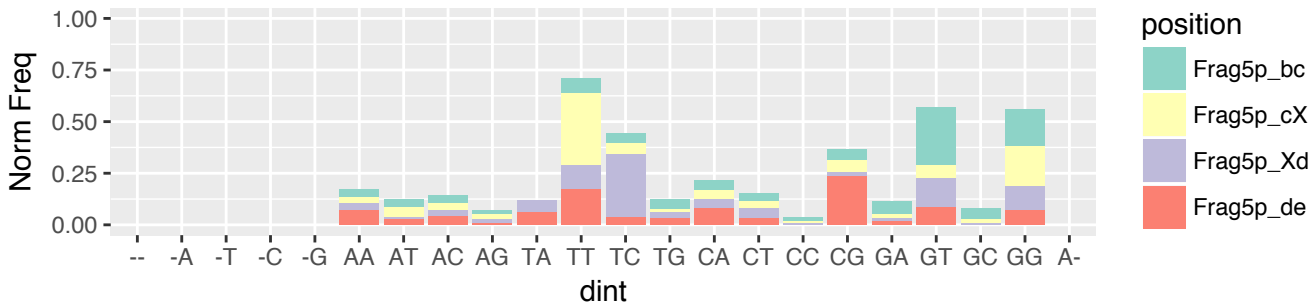

LGG (n=912)  
 3'-tRF & exclusive (n=159)  
 5' terminus relative to 5' stem of T-loop (n=110)

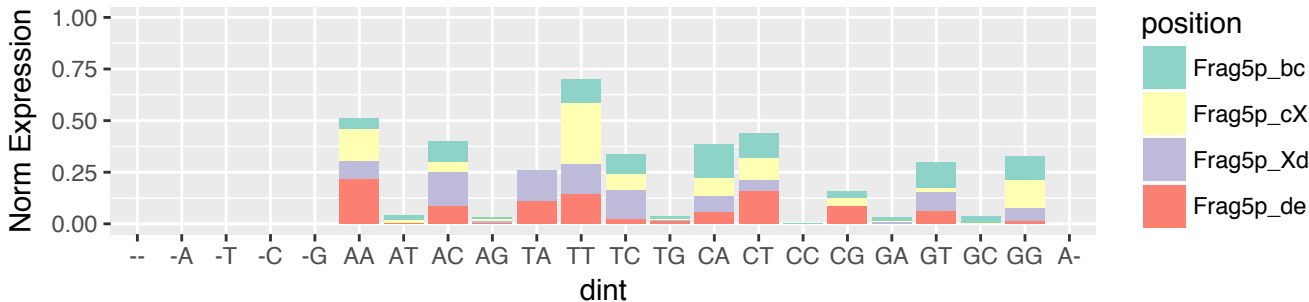

LGG (n=912)  
 3'-tRF & exclusive (n=159)  
 5' terminus relative to 3' stem of T-loop (n=49)

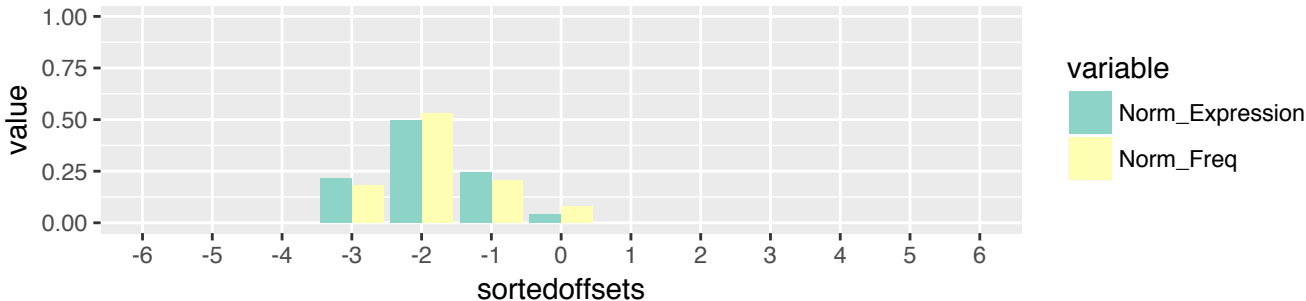

LGG (n=912)  
 3'-tRF & exclusive (n=159)  
 5' terminus relative to 3' stem of T-loop (n=49)

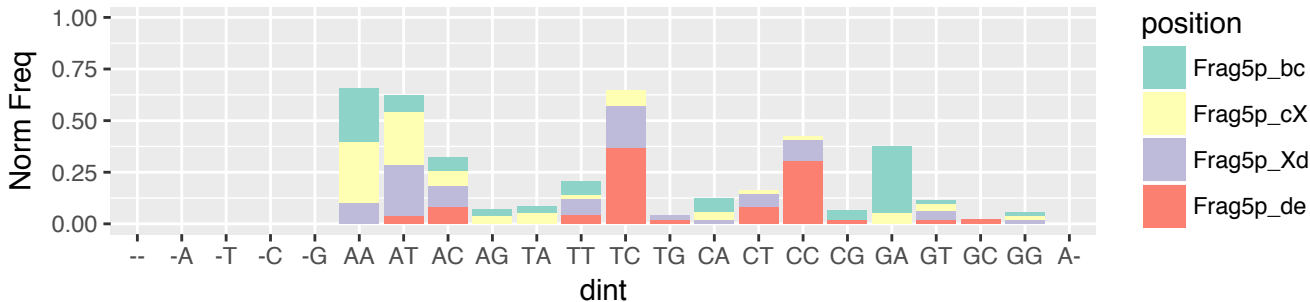

LGG (n=912)  
 3'-tRF & exclusive (n=159)  
 5' terminus relative to 3' stem of T-loop (n=49)

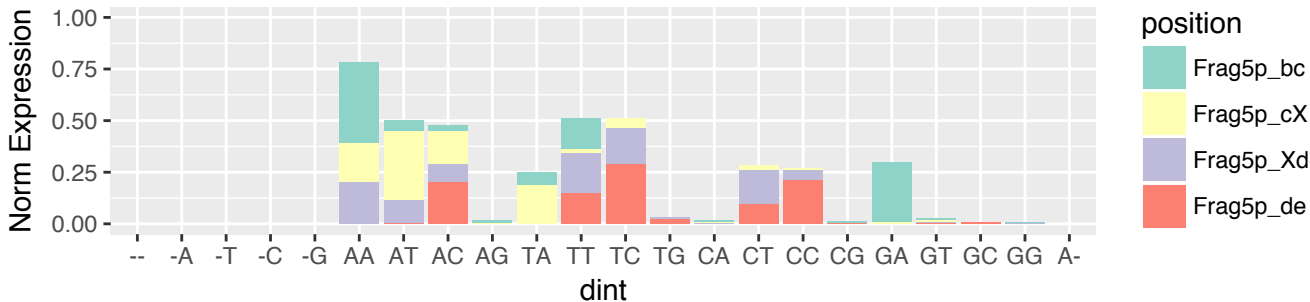

LGG (n=912)  
 3'-tRF & exclusive (n=159)  
 3' terminus relative to 3' end of the tRNA (n=159)

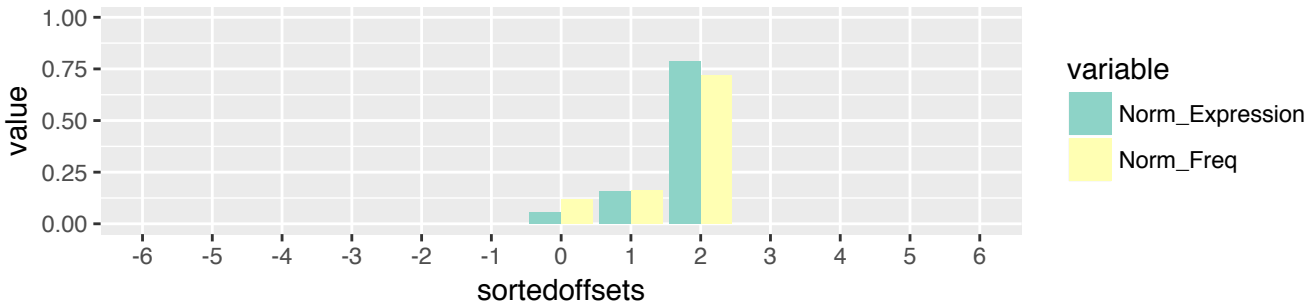

LGG (n=912)  
 3'-tRF & exclusive (n=159)  
 3' terminus relative to 3' end of the tRNA (n=159)

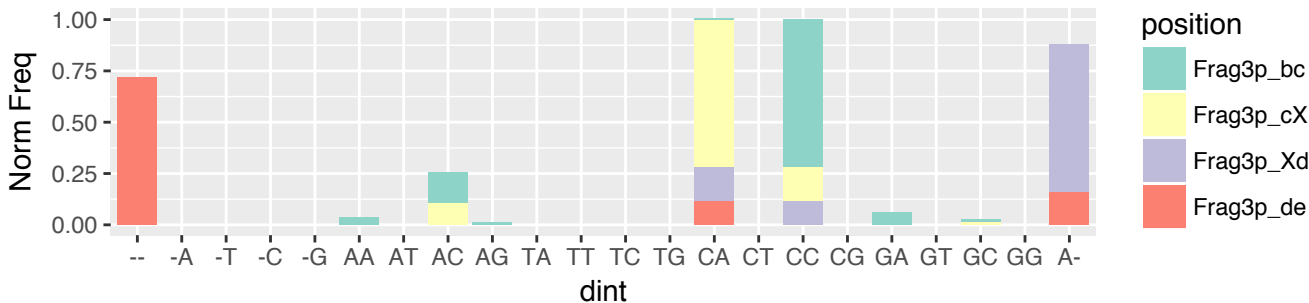

LGG (n=912)  
 3'-tRF & exclusive (n=159)  
 3' terminus relative to 3' end of the tRNA (n=159)

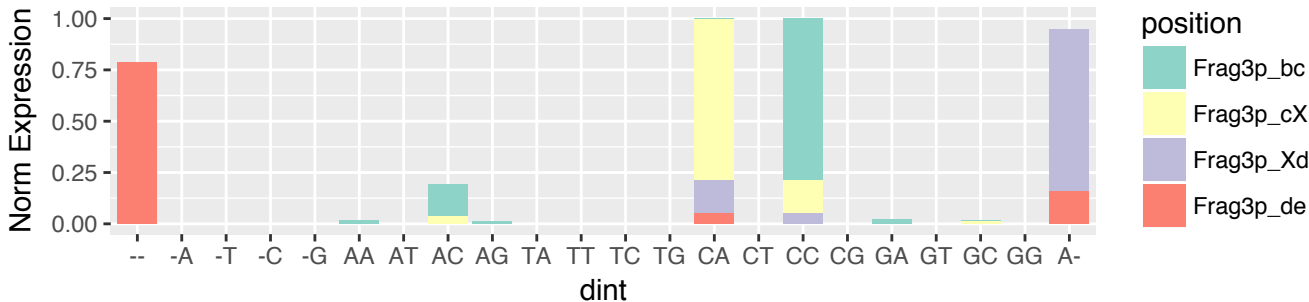

LIHC (n=949)  
5'-half & exclusive (n=5)  
5' terminus relative to 5' end of the tRNA (n=5)

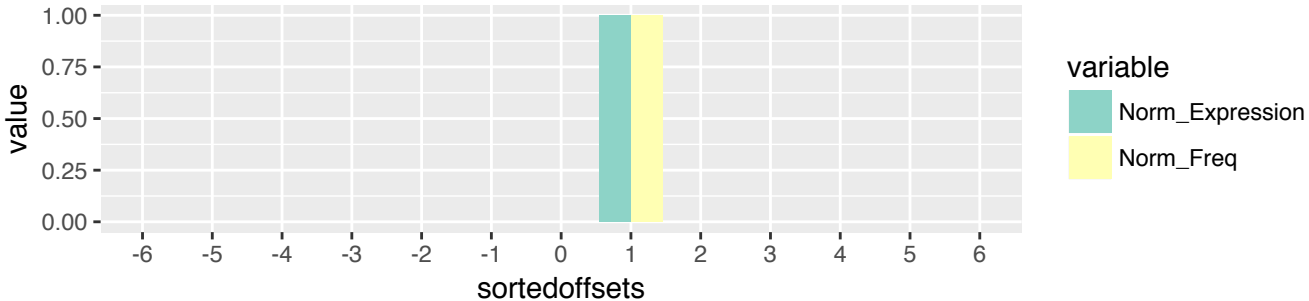

LIHC (n=949)  
5'-half & exclusive (n=5)  
5' terminus relative to 5' end of the tRNA (n=5)

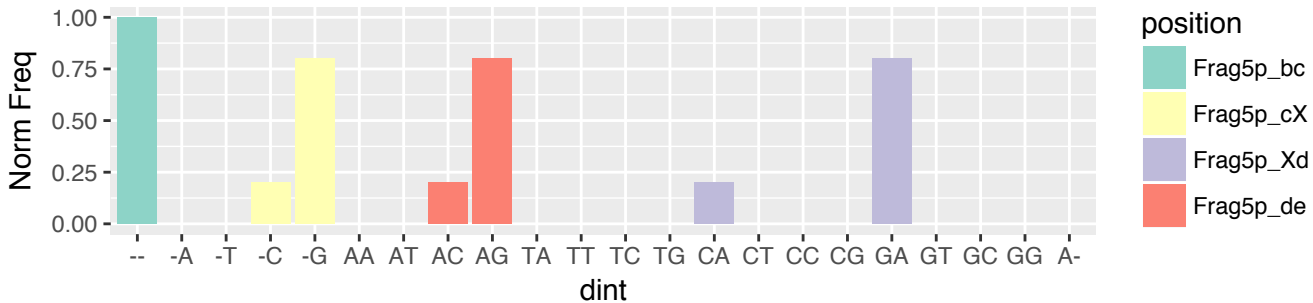

LIHC (n=949)  
5'-half & exclusive (n=5)  
5' terminus relative to 5' end of the tRNA (n=5)

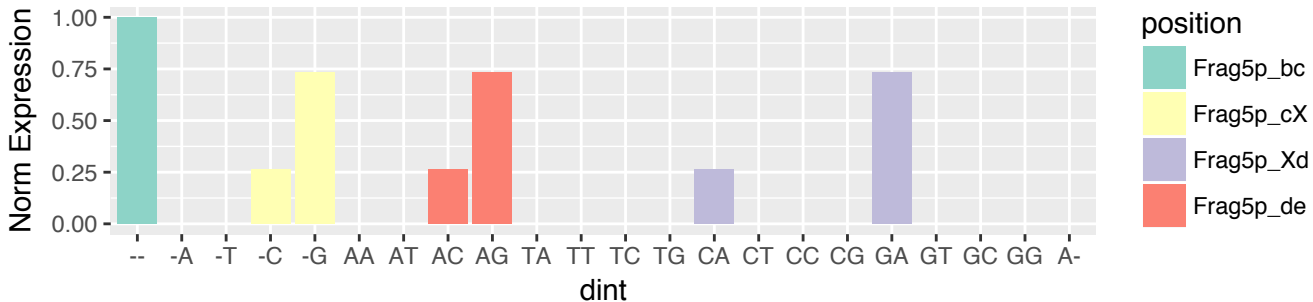

LIHC (n=949)  
 5'-half & exclusive (n=5)  
 3' terminus relative to 5' stem of A-loop (n=5)

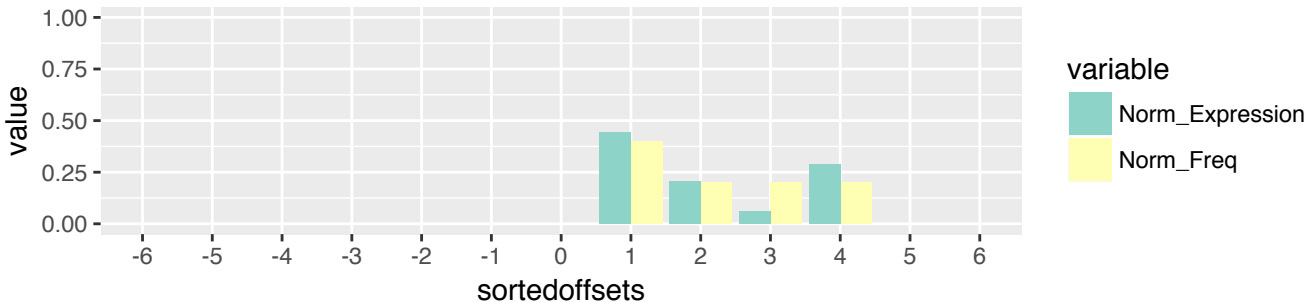

LIHC (n=949)  
 5'-half & exclusive (n=5)  
 3' terminus relative to 5' stem of A-loop (n=5)

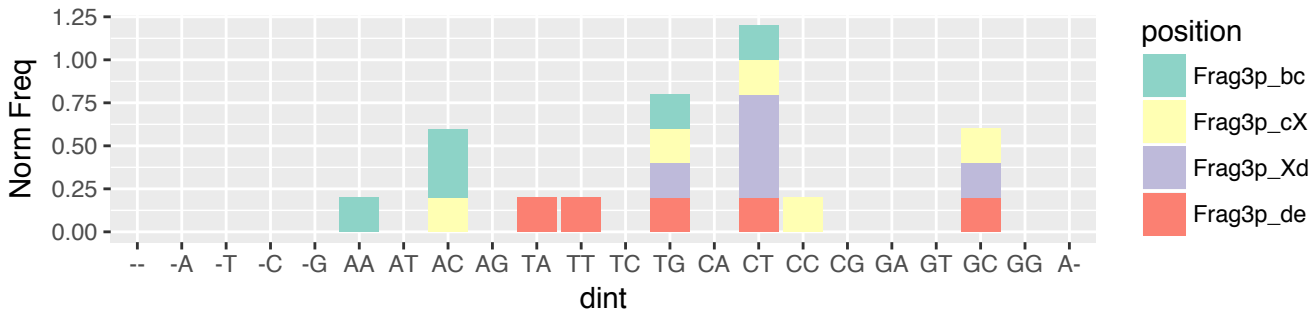

LIHC (n=949)  
 5'-half & exclusive (n=5)  
 3' terminus relative to 5' stem of A-loop (n=5)

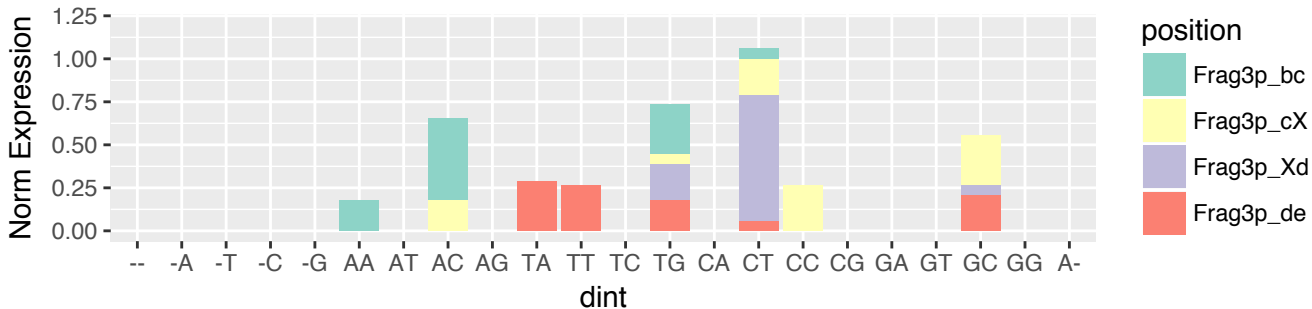

LIHC (n=949)  
 5'-tRF & exclusive (n=159)  
 5' terminus relative to 5' end of the tRNA (n=159)

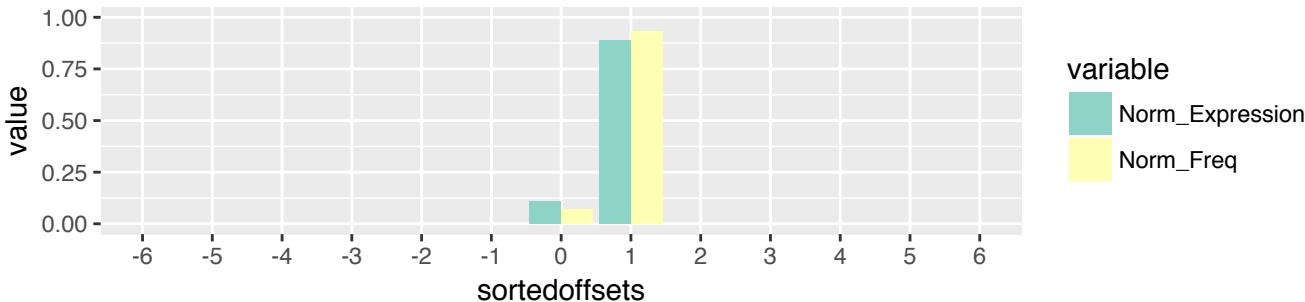

LIHC (n=949)  
 5'-tRF & exclusive (n=159)  
 5' terminus relative to 5' end of the tRNA (n=159)

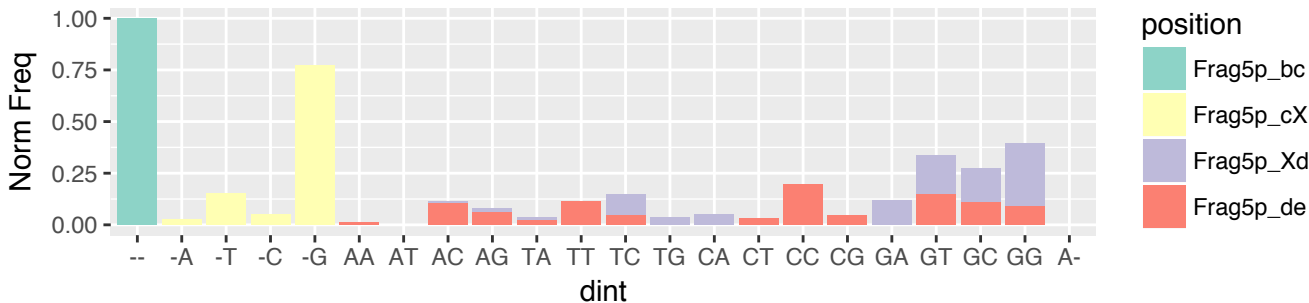

LIHC (n=949)  
 5'-tRF & exclusive (n=159)  
 5' terminus relative to 5' end of the tRNA (n=159)

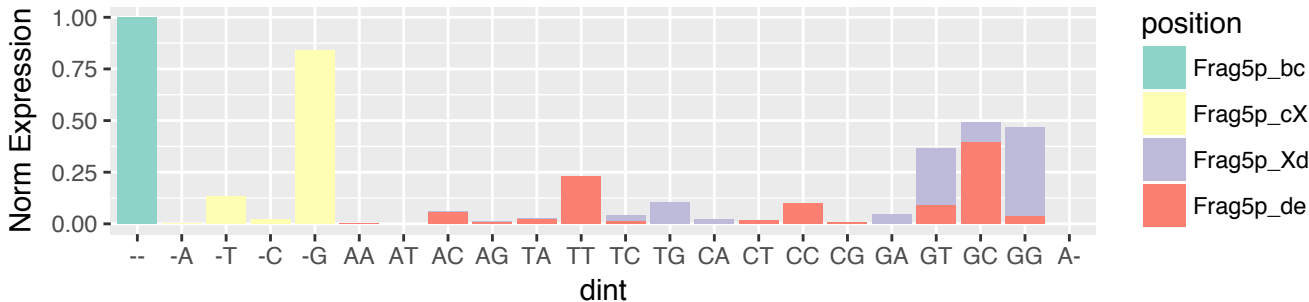

LIHC (n=949)  
 5'-tRF & exclusive (n=159)  
 3' terminus relative to 5' stem of D-loop (n=8)

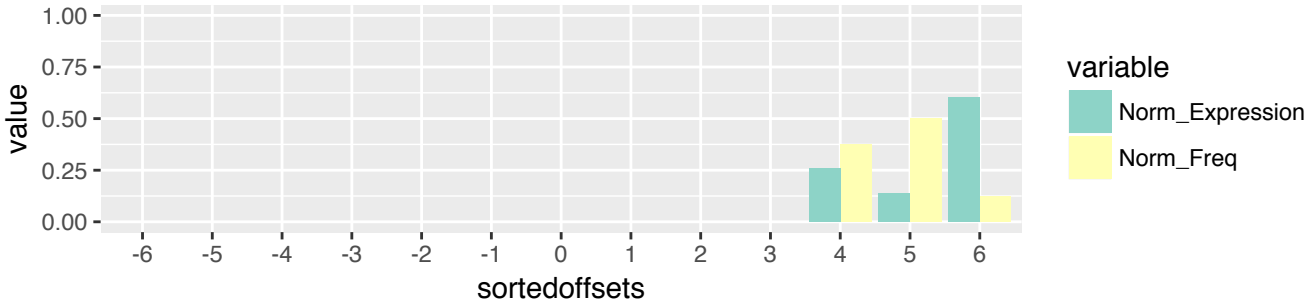

LIHC (n=949)  
 5'-tRF & exclusive (n=159)  
 3' terminus relative to 5' stem of D-loop (n=8)

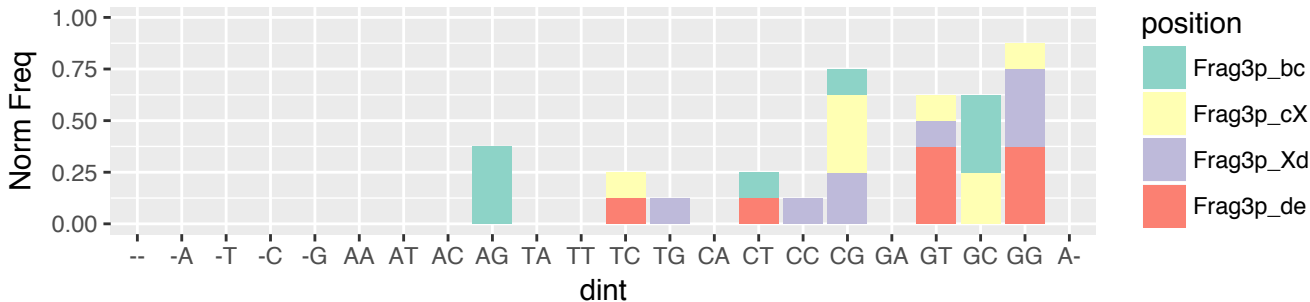

LIHC (n=949)  
 5'-tRF & exclusive (n=159)  
 3' terminus relative to 5' stem of D-loop (n=8)

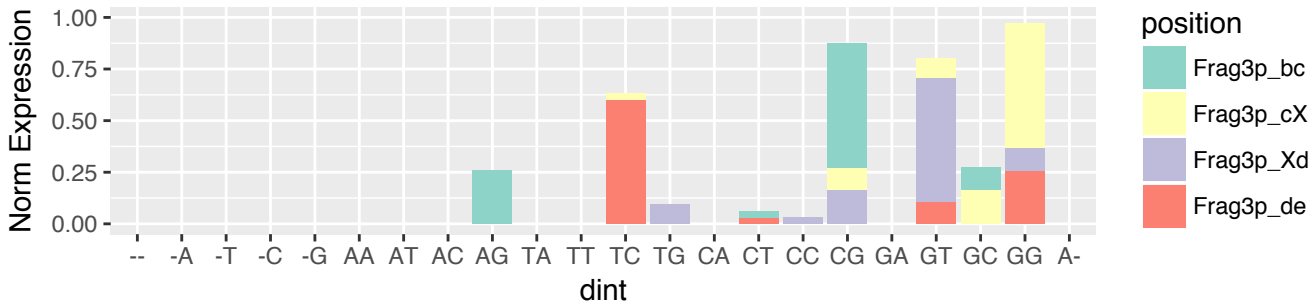

LIHC (n=949)  
 5'-tRF & exclusive (n=159)  
 3' terminus relative to 3' stem of D-loop (n=137)

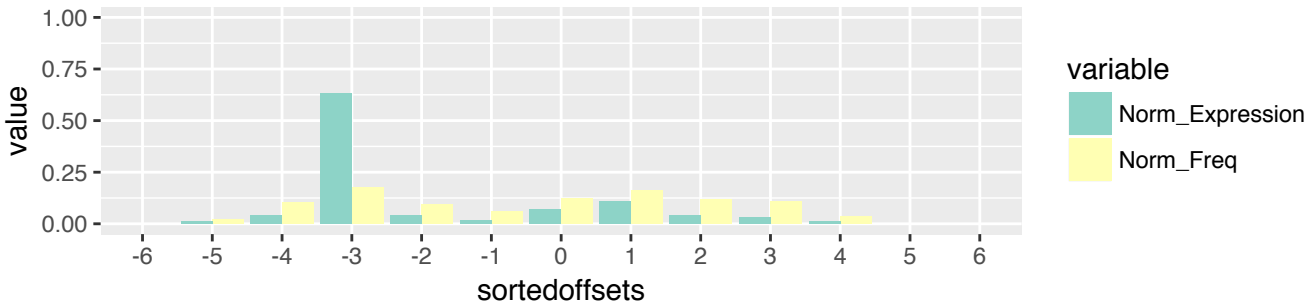

LIHC (n=949)  
 5'-tRF & exclusive (n=159)  
 3' terminus relative to 3' stem of D-loop (n=137)

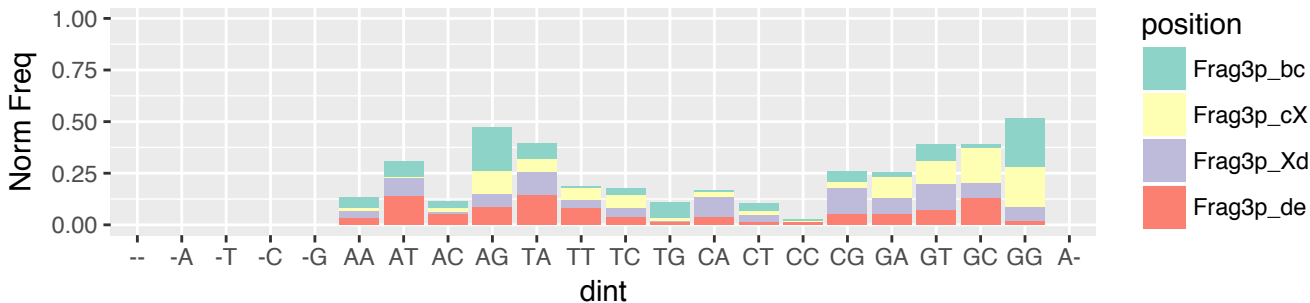

LIHC (n=949)  
 5'-tRF & exclusive (n=159)  
 3' terminus relative to 3' stem of D-loop (n=137)

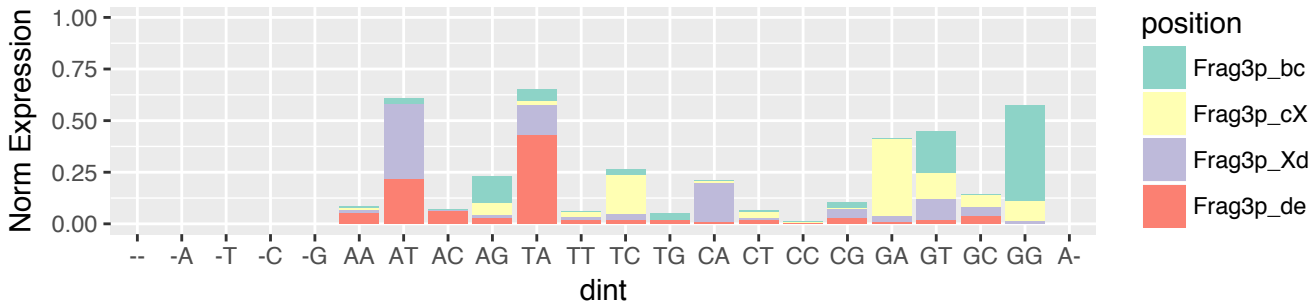



LIHC (n=949)  
 5'-tRF & exclusive (n=159)  
 3' terminus relative to 5' stem of A-loop (n=8)

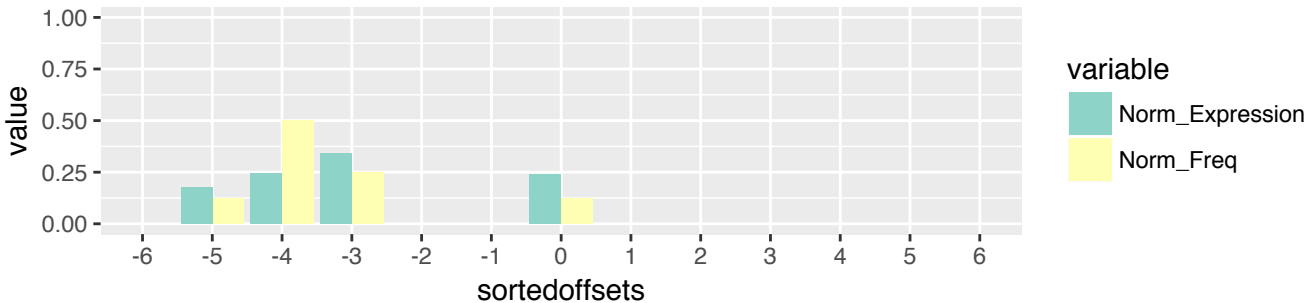

LIHC (n=949)  
 5'-tRF & exclusive (n=159)  
 3' terminus relative to 5' stem of A-loop (n=8)

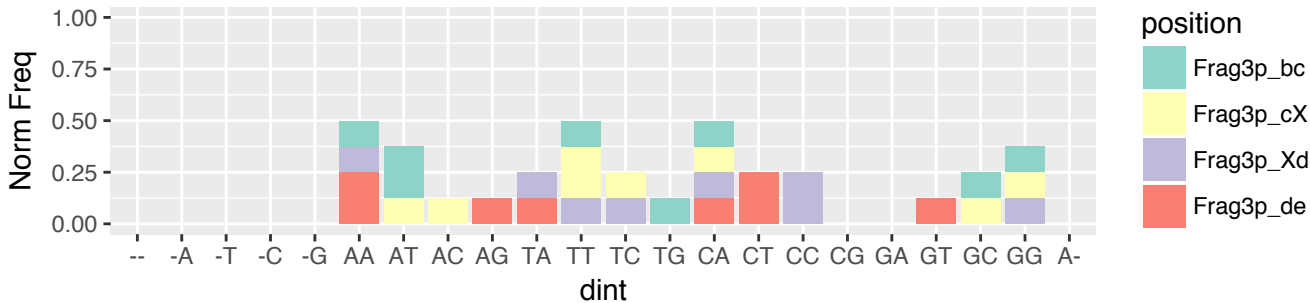

LIHC (n=949)  
 5'-tRF & exclusive (n=159)  
 3' terminus relative to 5' stem of A-loop (n=8)

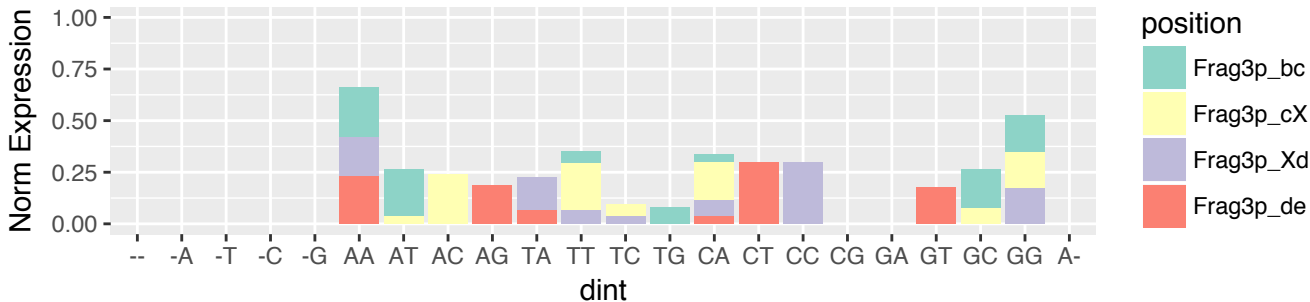

LIHC (n=949)  
 5'-tRF & exclusive (n=159)  
 3' terminus relative to 3' stem of A-loop (n=6)

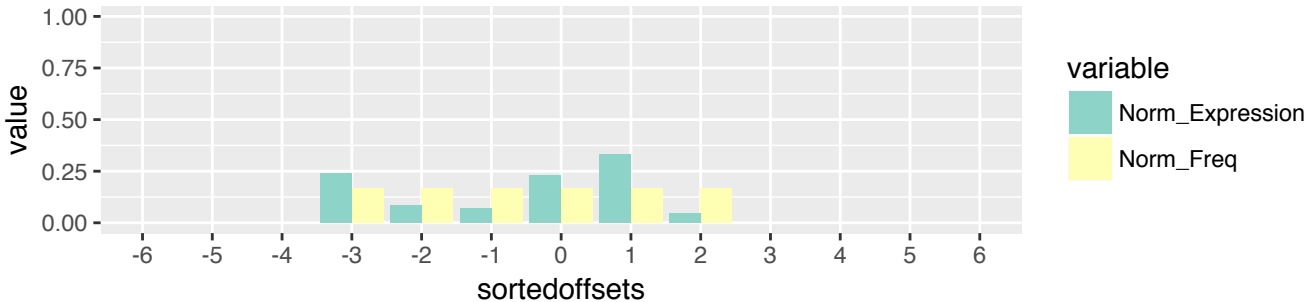

LIHC (n=949)  
 5'-tRF & exclusive (n=159)  
 3' terminus relative to 3' stem of A-loop (n=6)

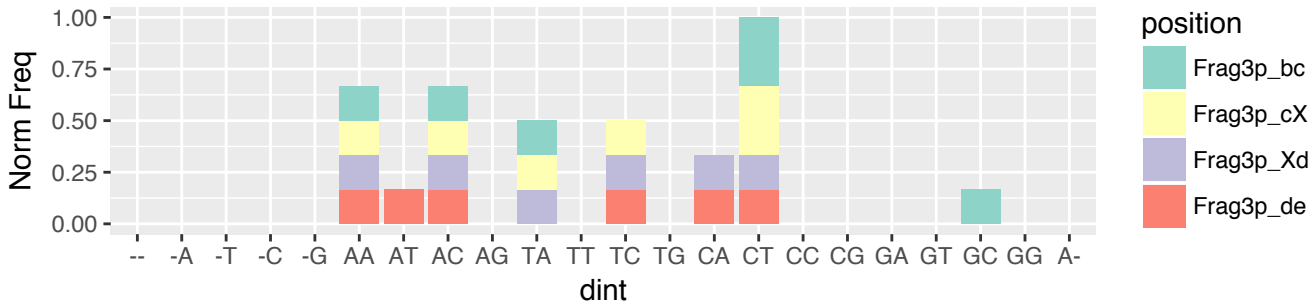

LIHC (n=949)  
 5'-tRF & exclusive (n=159)  
 3' terminus relative to 3' stem of A-loop (n=6)

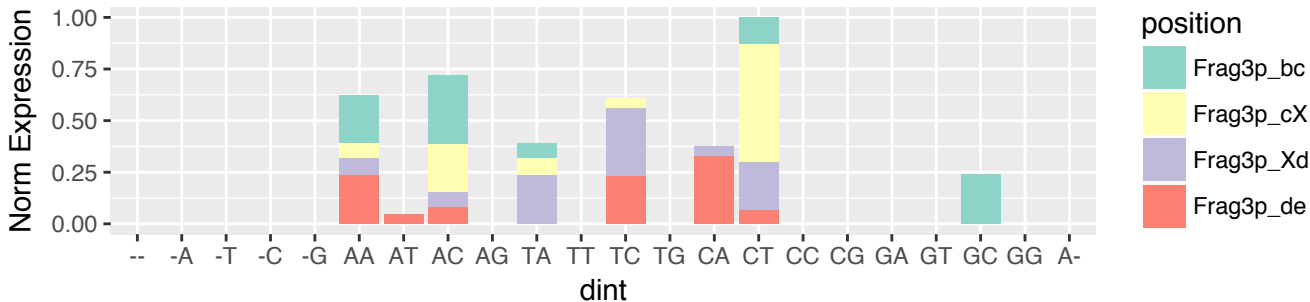

LIHC (n=949)  
 i-tRF & exclusive (n=167)  
 5' terminus relative to 5' end of the tRNA (n=3)

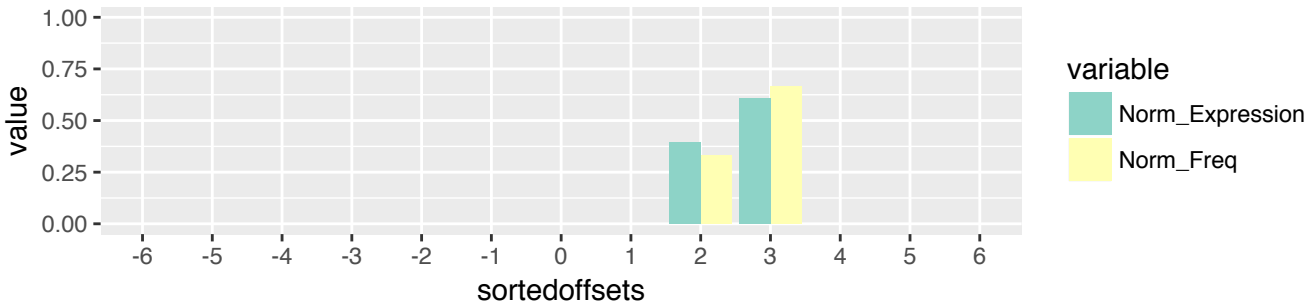

LIHC (n=949)  
 i-tRF & exclusive (n=167)  
 5' terminus relative to 5' end of the tRNA (n=3)

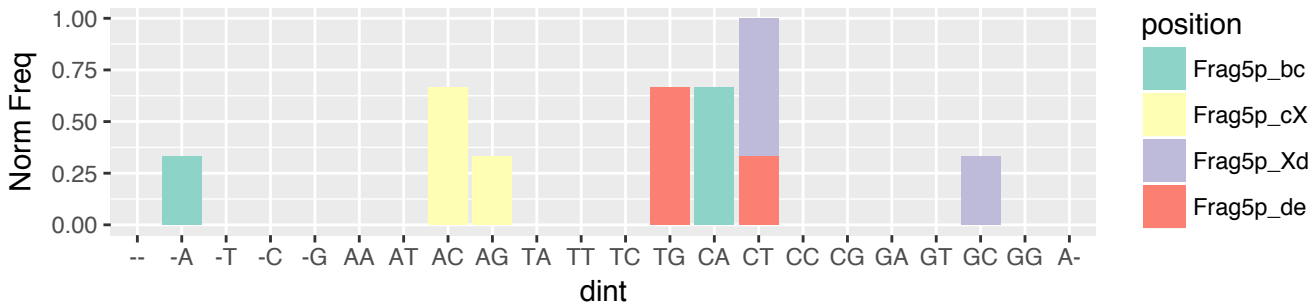

LIHC (n=949)  
 i-tRF & exclusive (n=167)  
 5' terminus relative to 5' end of the tRNA (n=3)

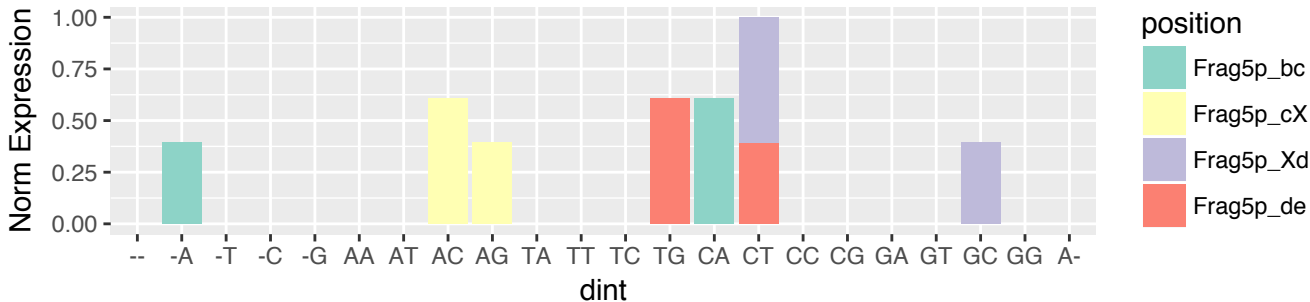

LIHC (n=949)  
 i-tRF & exclusive (n=167)  
 5' terminus relative to 5' stem of D-loop (n=68)

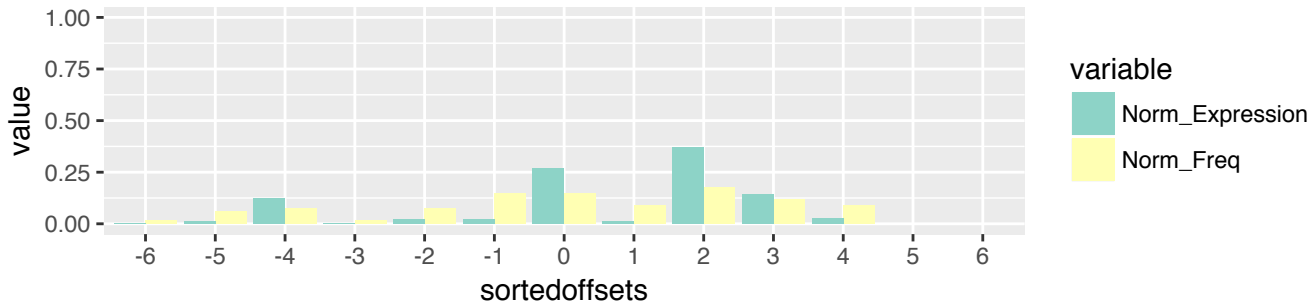

LIHC (n=949)  
 i-tRF & exclusive (n=167)  
 5' terminus relative to 5' stem of D-loop (n=68)

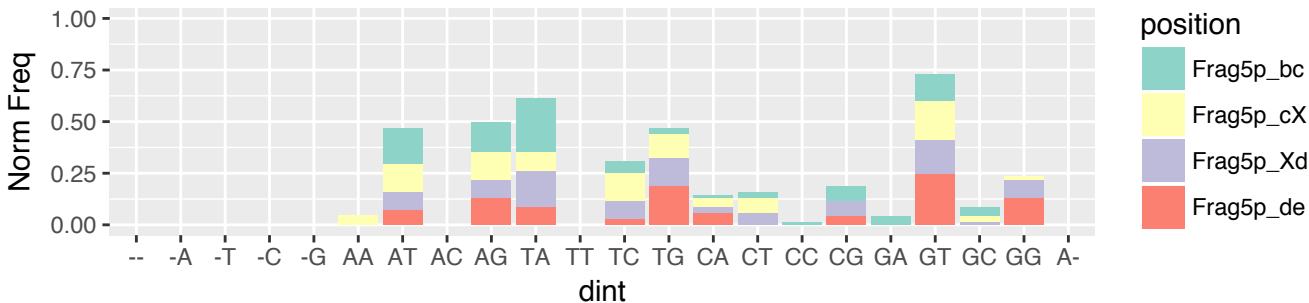

LIHC (n=949)  
 i-tRF & exclusive (n=167)  
 5' terminus relative to 5' stem of D-loop (n=68)

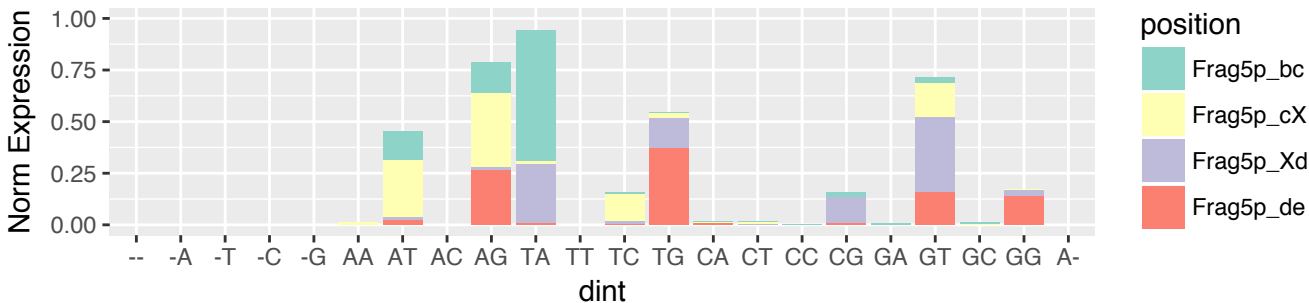

LIHC (n=949)  
 i-tRF & exclusive (n=167)  
 5' terminus relative to 3' stem of D-loop (n=8)

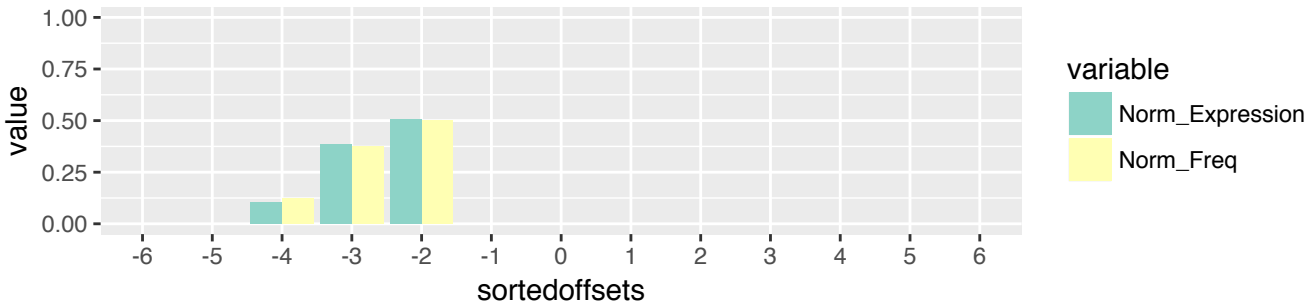

LIHC (n=949)  
 i-tRF & exclusive (n=167)  
 5' terminus relative to 3' stem of D-loop (n=8)

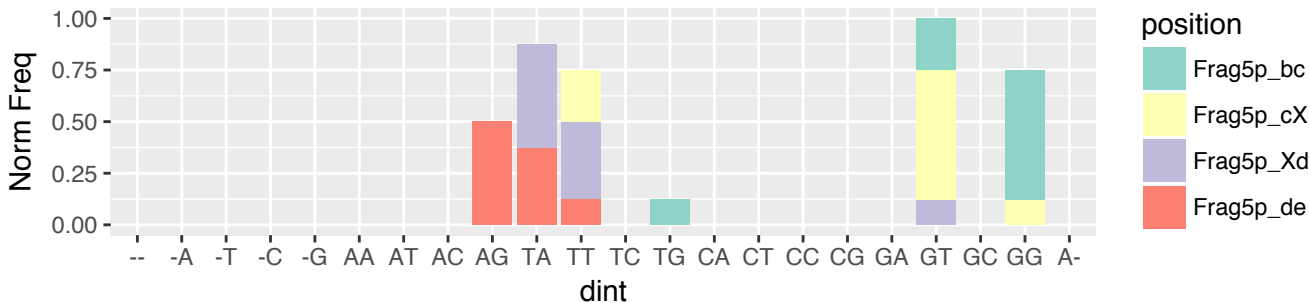

LIHC (n=949)  
 i-tRF & exclusive (n=167)  
 5' terminus relative to 3' stem of D-loop (n=8)

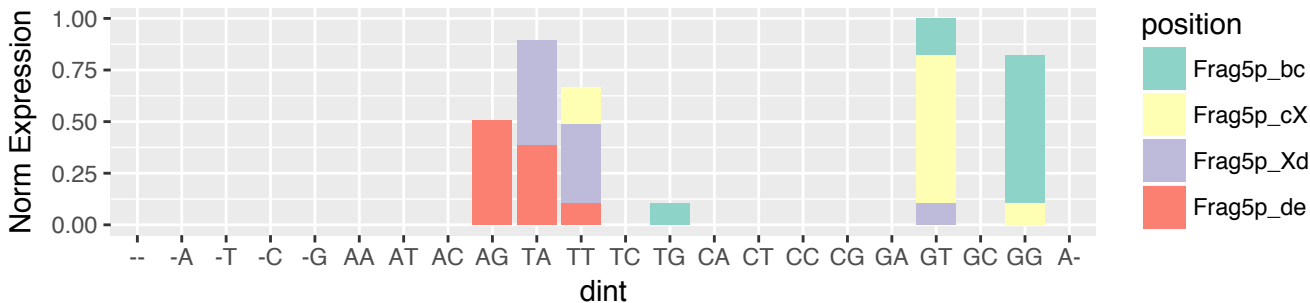

LIHC (n=949)  
i-tRF & exclusive (n=167)  
5' terminus relative to 5' stem of A-loop (n=25)

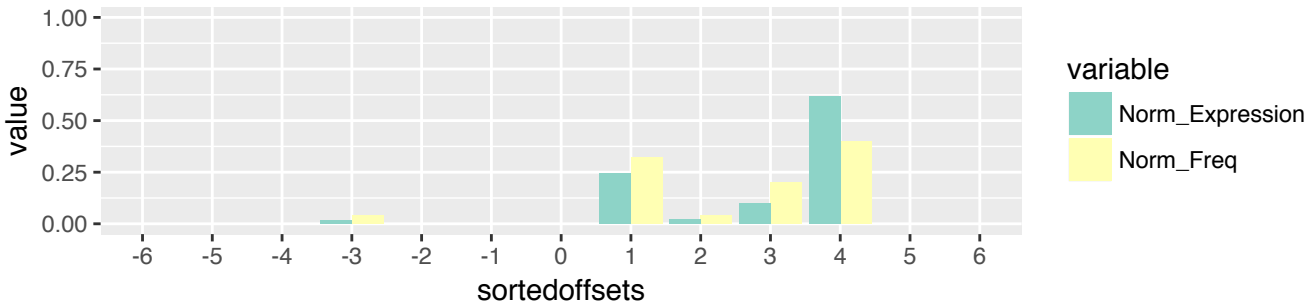

LIHC (n=949)  
i-tRF & exclusive (n=167)  
5' terminus relative to 5' stem of A-loop (n=25)

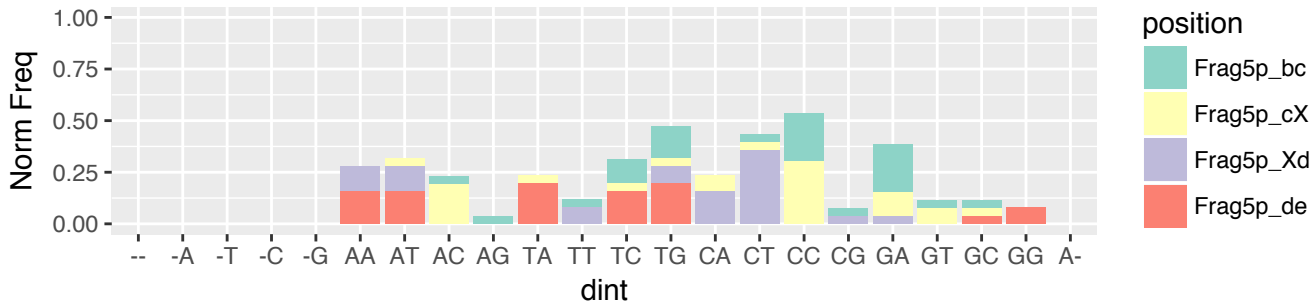

LIHC (n=949)  
i-tRF & exclusive (n=167)  
5' terminus relative to 5' stem of A-loop (n=25)

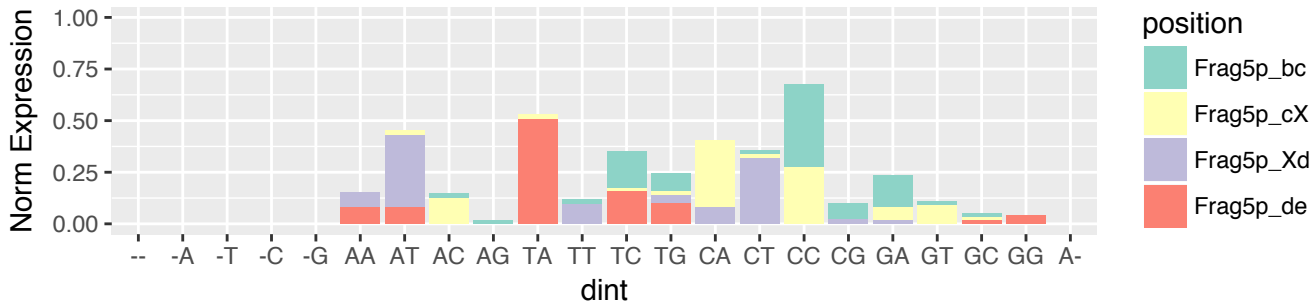

LIHC (n=949)  
i-tRF & exclusive (n=167)  
5' terminus relative to 3' stem of A-loop (n=51)

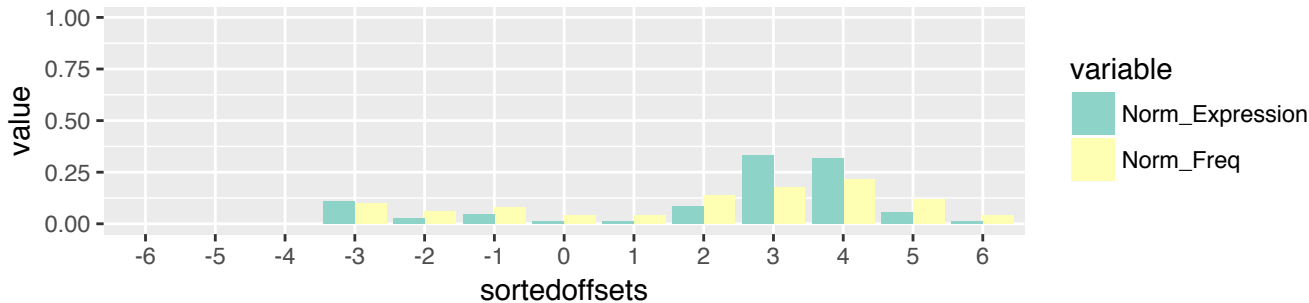

LIHC (n=949)  
i-tRF & exclusive (n=167)  
5' terminus relative to 3' stem of A-loop (n=51)

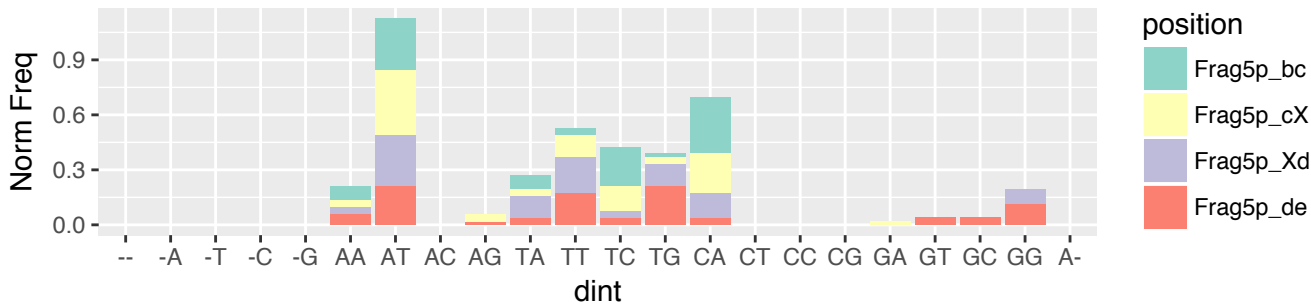

LIHC (n=949)  
i-tRF & exclusive (n=167)  
5' terminus relative to 3' stem of A-loop (n=51)

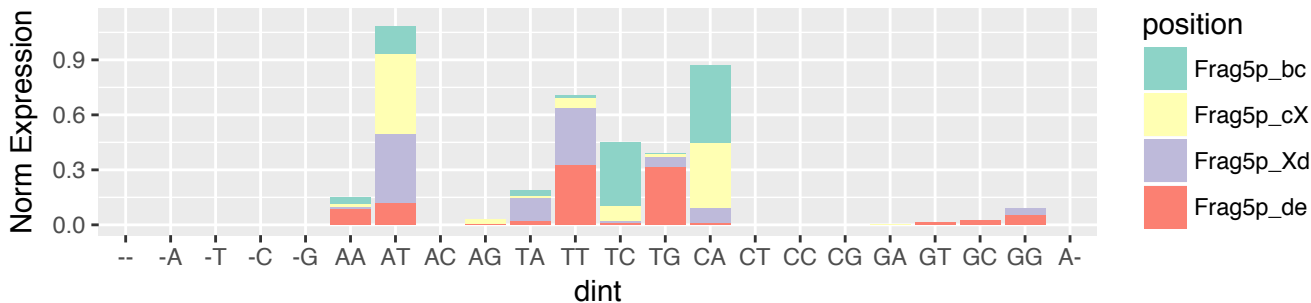

LIHC (n=949)  
i-tRF & exclusive (n=167)  
5' terminus relative to 5' stem of T-loop (n=12)

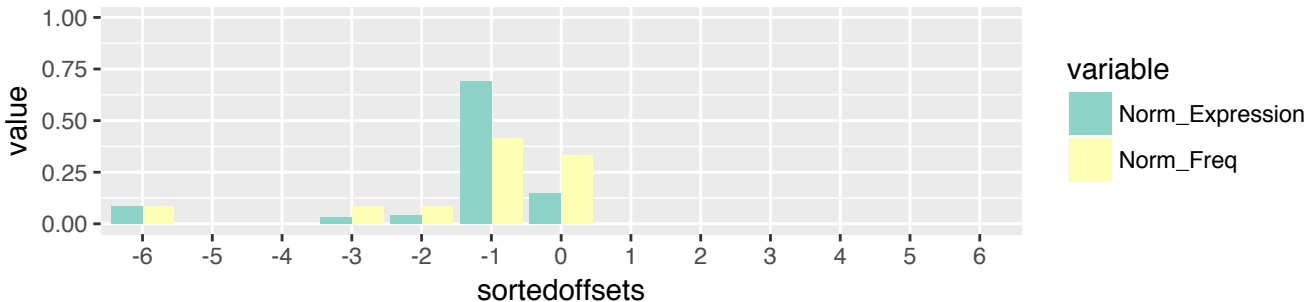

LIHC (n=949)  
i-tRF & exclusive (n=167)  
5' terminus relative to 5' stem of T-loop (n=12)

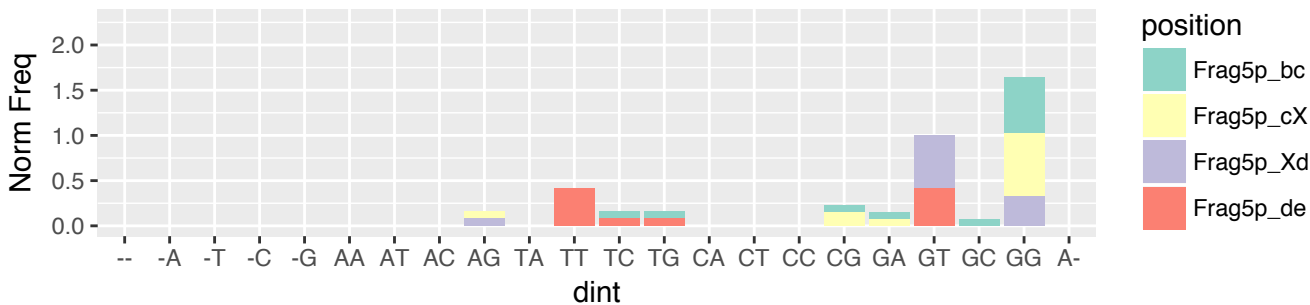

LIHC (n=949)  
i-tRF & exclusive (n=167)  
5' terminus relative to 5' stem of T-loop (n=12)

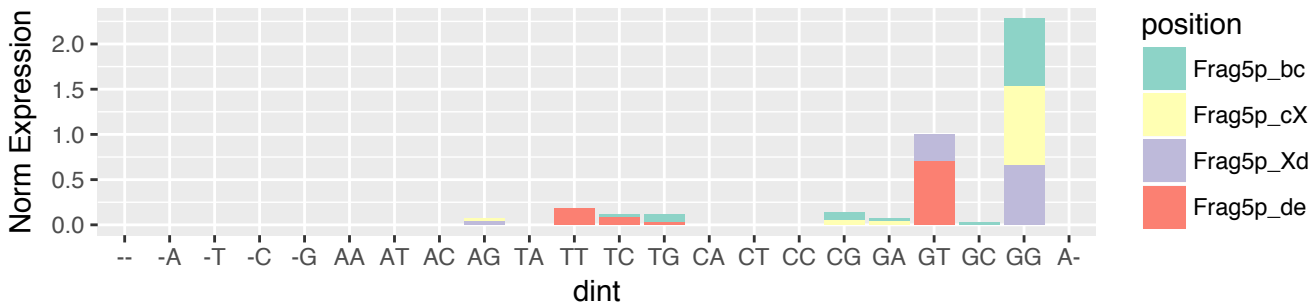



LIHC (n=949)  
i-tRF & exclusive (n=167)  
3' terminus relative to 3' stem of D-loop (n=1)

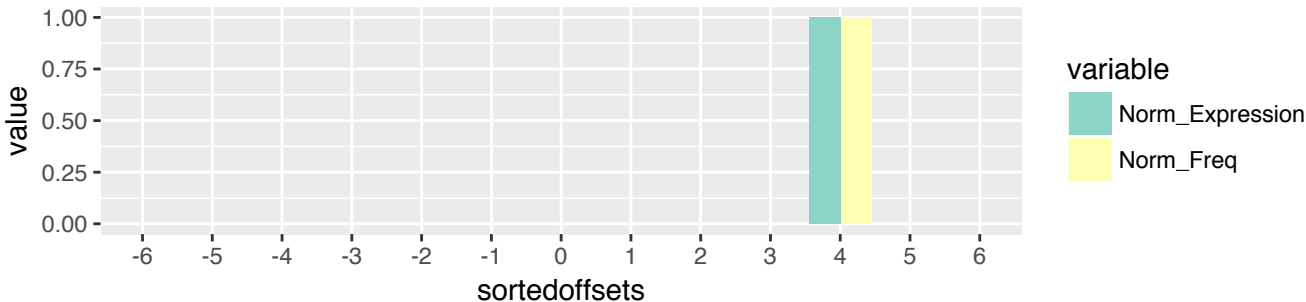

LIHC (n=949)  
i-tRF & exclusive (n=167)  
3' terminus relative to 3' stem of D-loop (n=1)

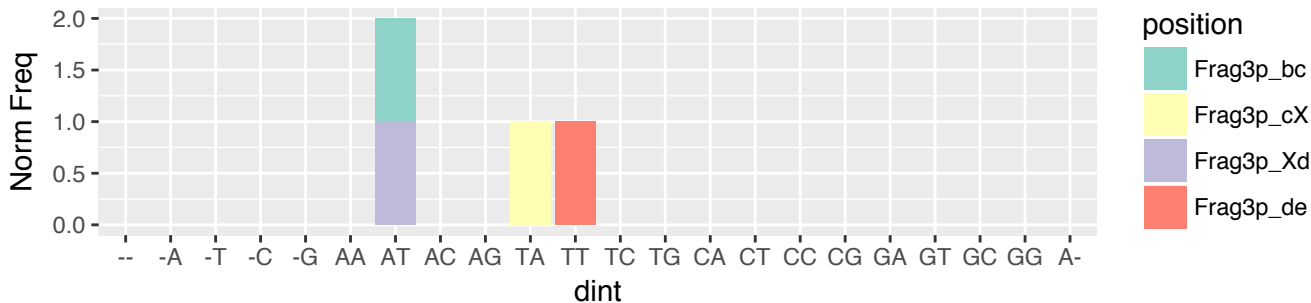

LIHC (n=949)  
i-tRF & exclusive (n=167)  
3' terminus relative to 3' stem of D-loop (n=1)

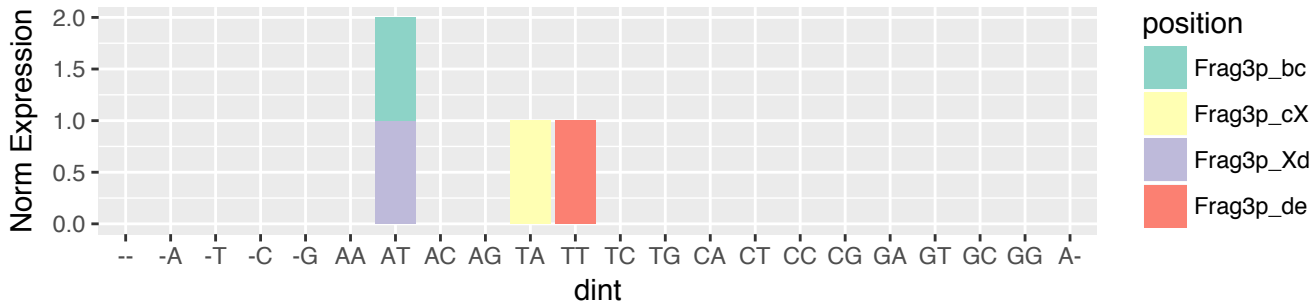

LIHC (n=949)  
 i-tRF & exclusive (n=167)  
 3' terminus relative to 5' stem of A-loop (n=58)

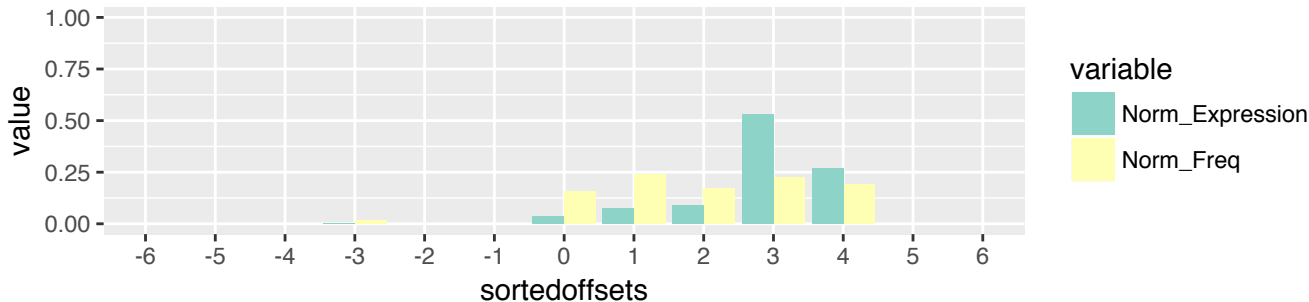

LIHC (n=949)  
 i-tRF & exclusive (n=167)  
 3' terminus relative to 5' stem of A-loop (n=58)

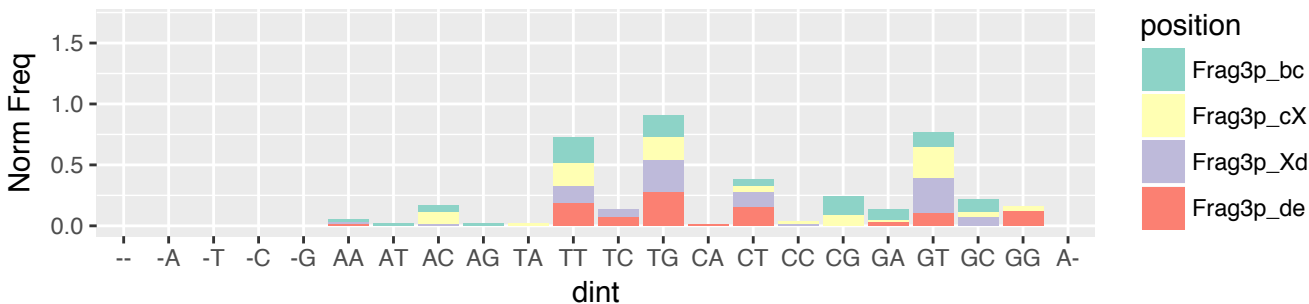

LIHC (n=949)  
 i-tRF & exclusive (n=167)  
 3' terminus relative to 5' stem of A-loop (n=58)

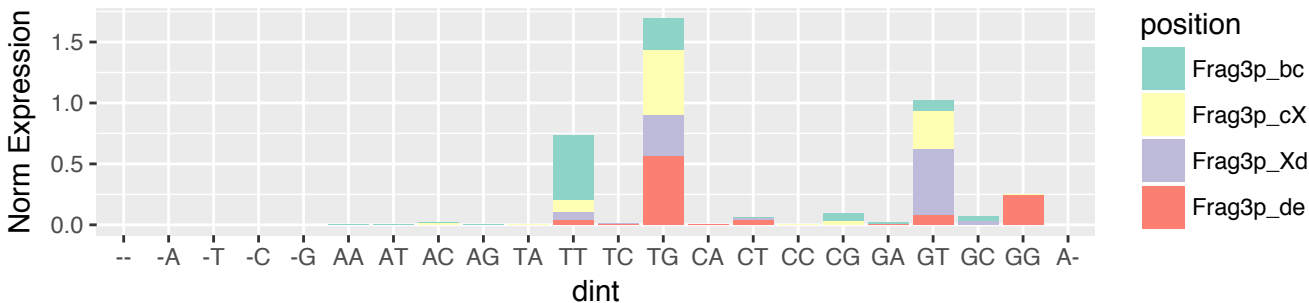

LIHC (n=949)  
 i-tRF & exclusive (n=167)  
 3' terminus relative to 3' stem of A-loop (n=22)

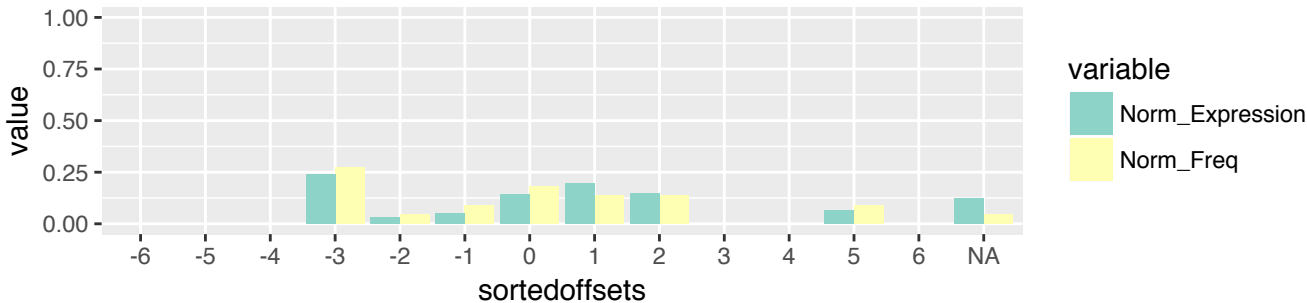

LIHC (n=949)  
 i-tRF & exclusive (n=167)  
 3' terminus relative to 3' stem of A-loop (n=22)

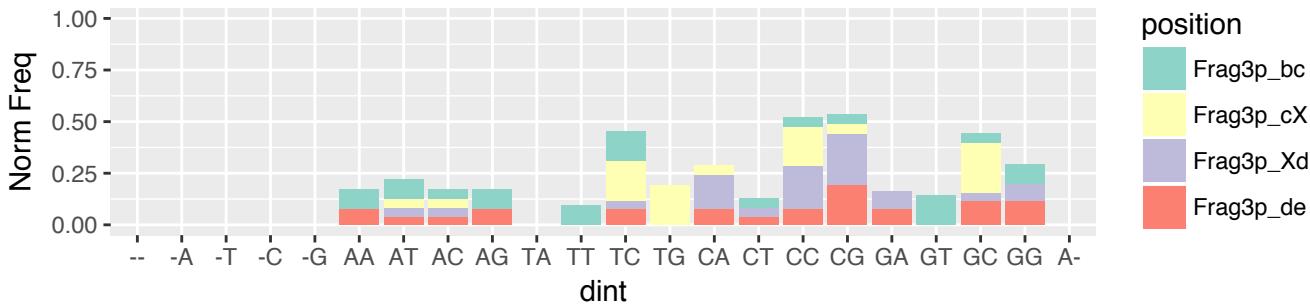

LIHC (n=949)  
 i-tRF & exclusive (n=167)  
 3' terminus relative to 3' stem of A-loop (n=22)

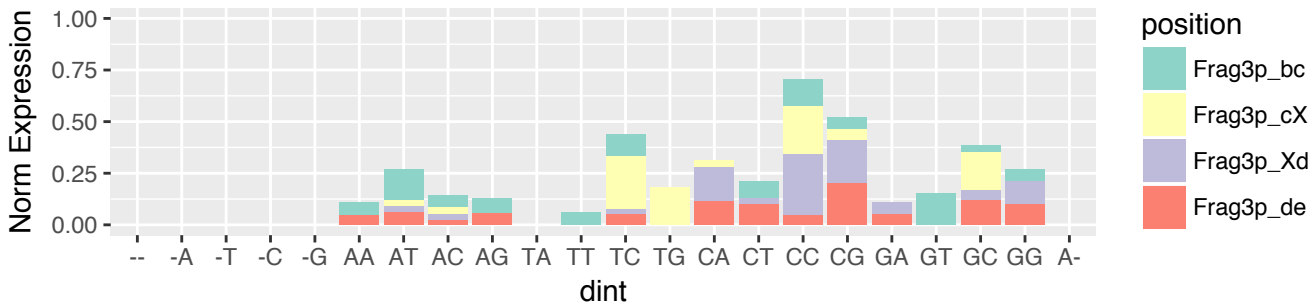

LIHC (n=949)  
i-tRF & exclusive (n=167)  
3' terminus relative to 5' stem of T-loop (n=27)

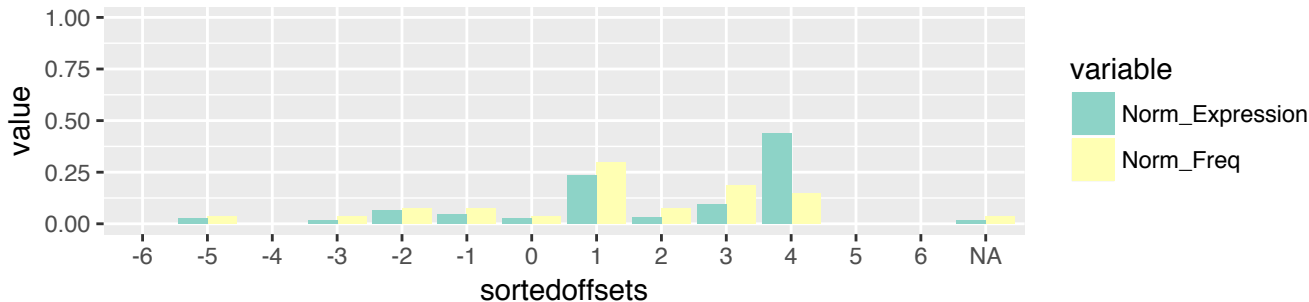

LIHC (n=949)  
i-tRF & exclusive (n=167)  
3' terminus relative to 5' stem of T-loop (n=27)

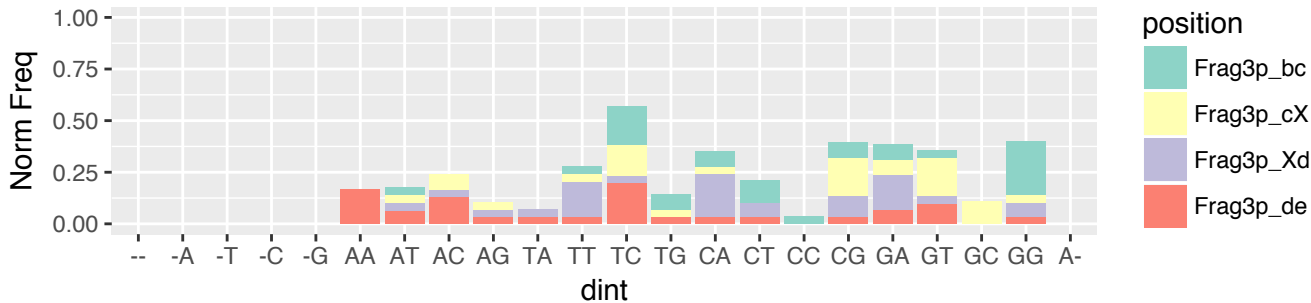

LIHC (n=949)  
i-tRF & exclusive (n=167)  
3' terminus relative to 5' stem of T-loop (n=27)

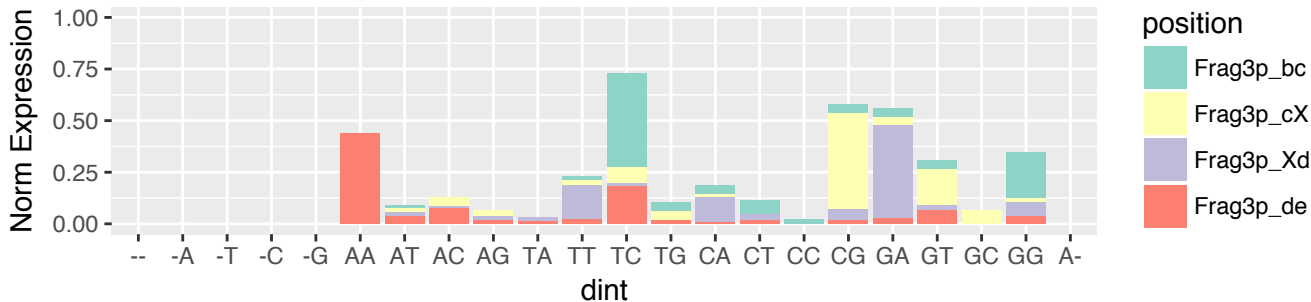

LIHC (n=949)  
i-tRF & exclusive (n=167)  
3' terminus relative to 3' stem of T-loop (n=40)

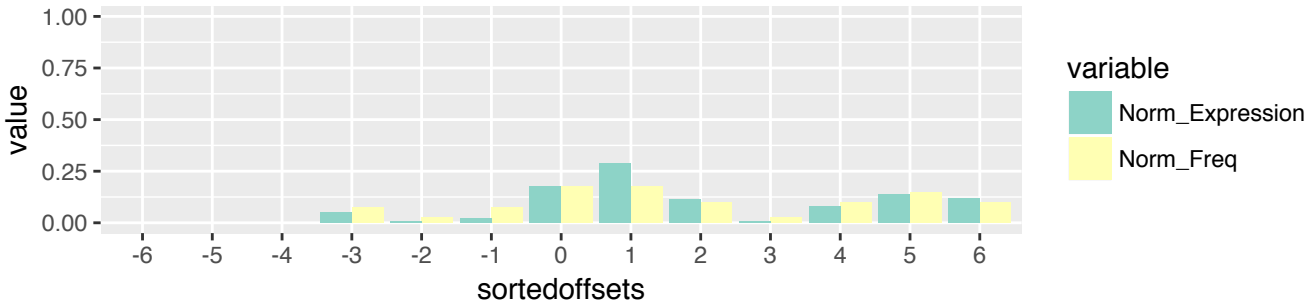

LIHC (n=949)  
i-tRF & exclusive (n=167)  
3' terminus relative to 3' stem of T-loop (n=40)

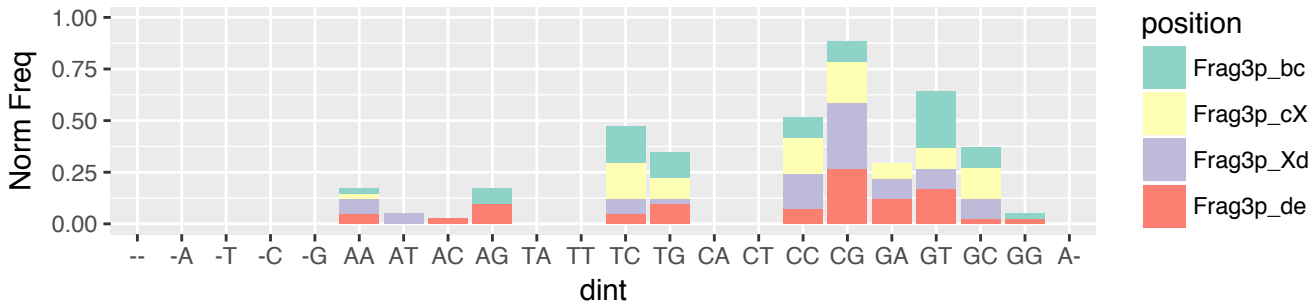

LIHC (n=949)  
i-tRF & exclusive (n=167)  
3' terminus relative to 3' stem of T-loop (n=40)

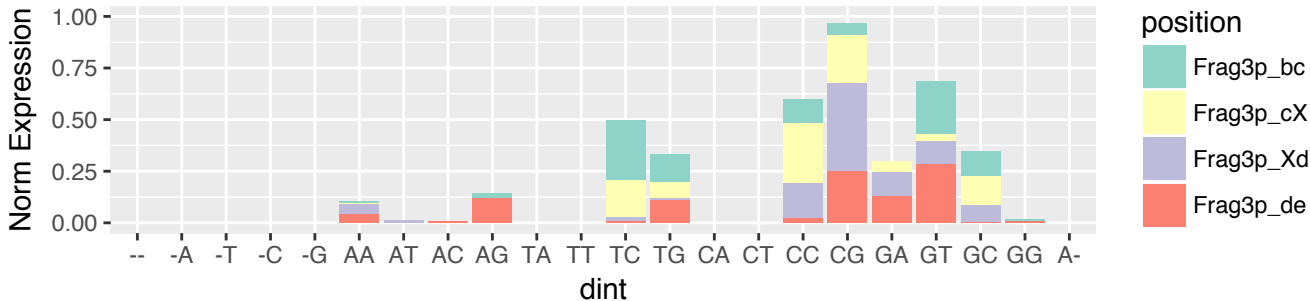

LIHC (n=949)  
 i-tRF & exclusive (n=167)  
 3' terminus relative to 3' end of the tRNA (n=20)

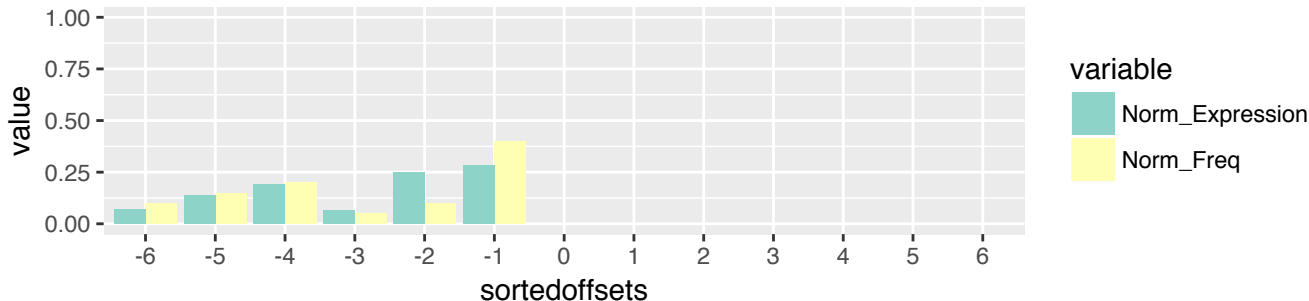

LIHC (n=949)  
 i-tRF & exclusive (n=167)  
 3' terminus relative to 3' end of the tRNA (n=20)

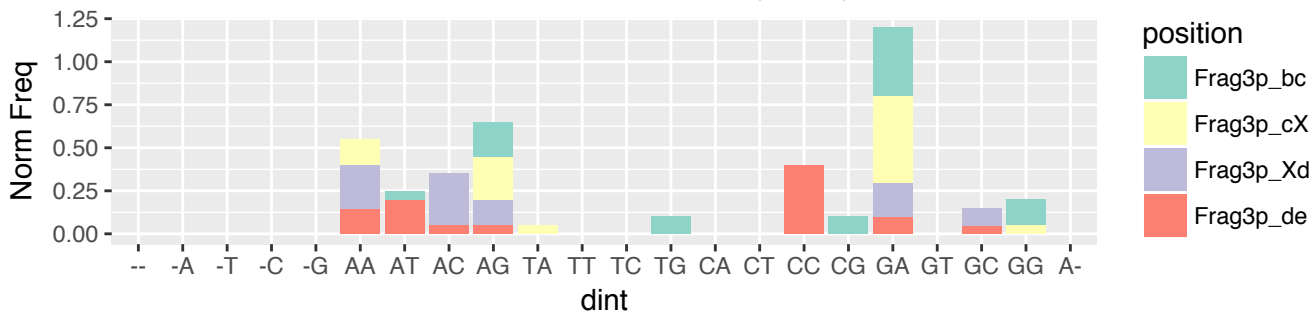

LIHC (n=949)  
 i-tRF & exclusive (n=167)  
 3' terminus relative to 3' end of the tRNA (n=20)

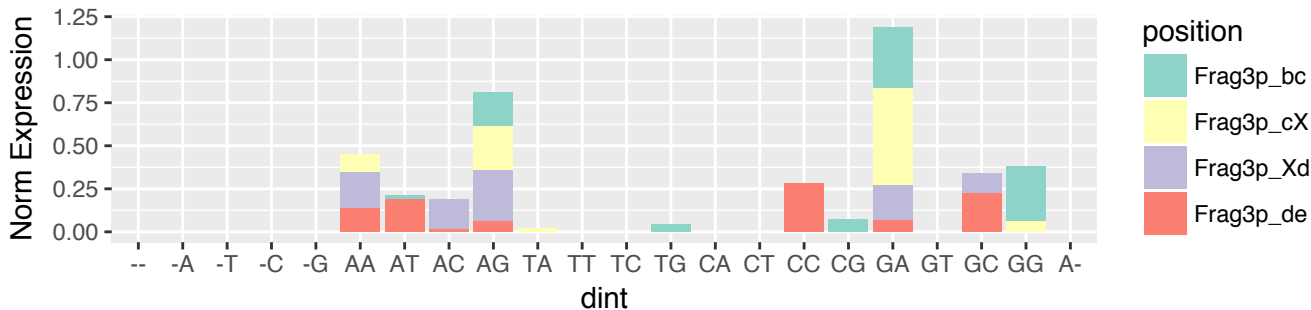

LIHC (n=949)  
 3'-tRF & exclusive (n=180)  
 5' terminus relative to 5' stem of T-loop (n=125)

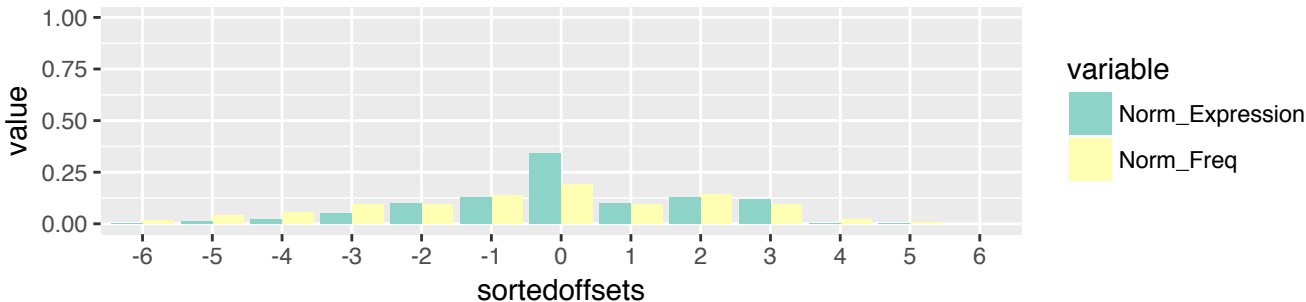

LIHC (n=949)  
 3'-tRF & exclusive (n=180)  
 5' terminus relative to 5' stem of T-loop (n=125)

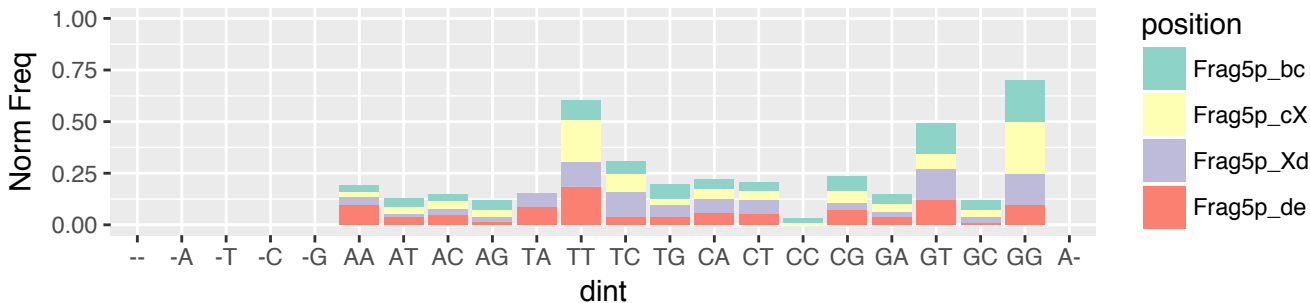

LIHC (n=949)  
 3'-tRF & exclusive (n=180)  
 5' terminus relative to 5' stem of T-loop (n=125)

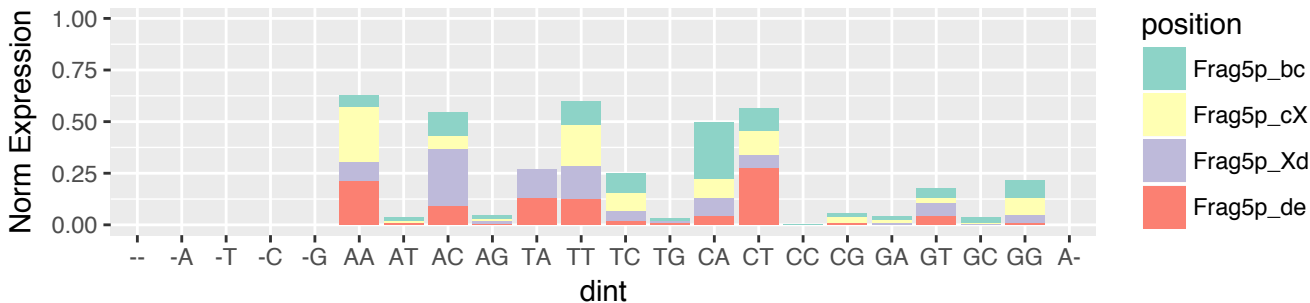

LIHC (n=949)  
 3'-tRF & exclusive (n=180)  
 5' terminus relative to 3' stem of T-loop (n=55)

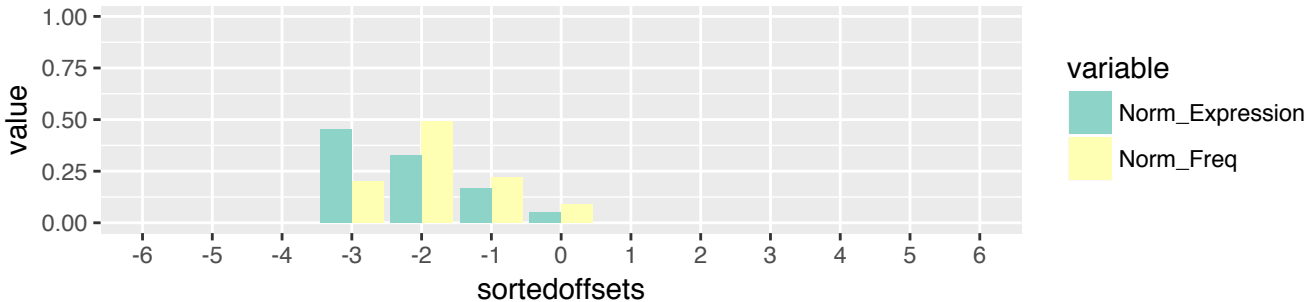

LIHC (n=949)  
 3'-tRF & exclusive (n=180)  
 5' terminus relative to 3' stem of T-loop (n=55)

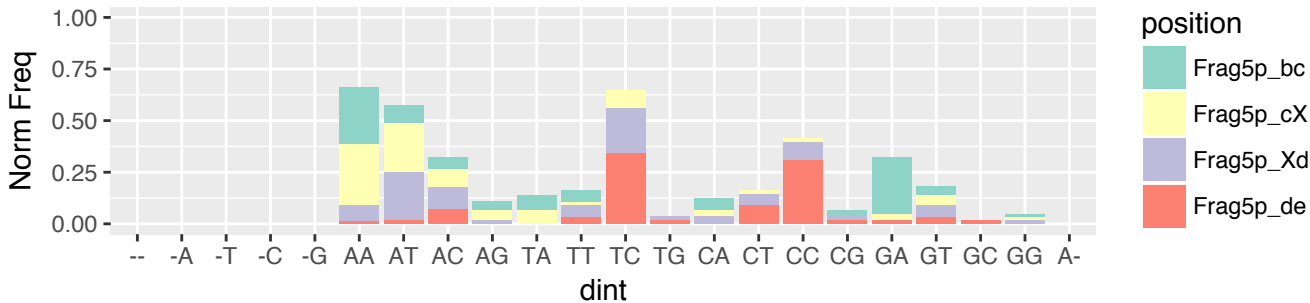

LIHC (n=949)  
 3'-tRF & exclusive (n=180)  
 5' terminus relative to 3' stem of T-loop (n=55)

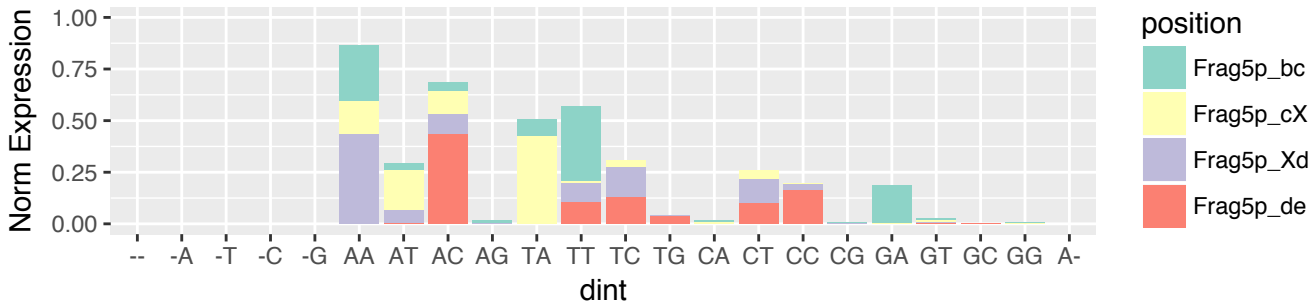



LIHC (n=949)  
 3'-tRF & exclusive (n=180)  
 3' terminus relative to 3' end of the tRNA (n=180)

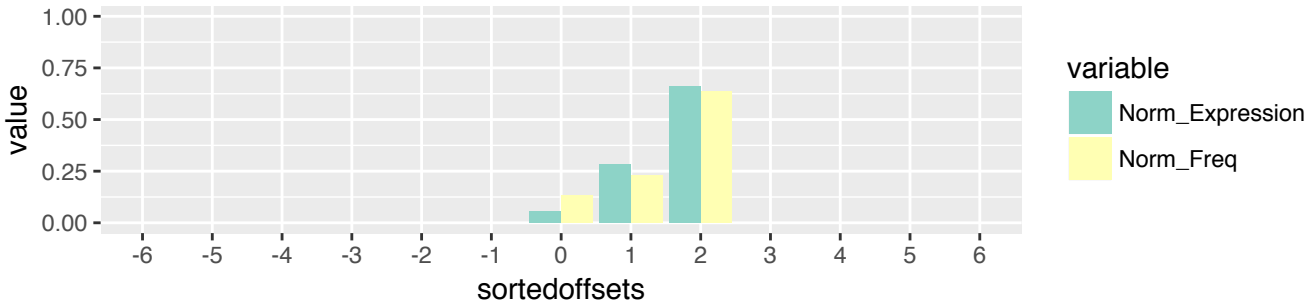

LIHC (n=949)  
 3'-tRF & exclusive (n=180)  
 3' terminus relative to 3' end of the tRNA (n=180)

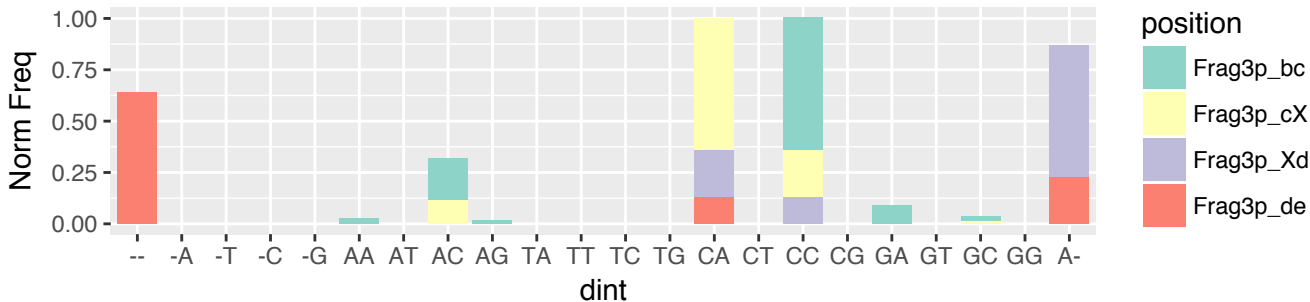

LIHC (n=949)  
 3'-tRF & exclusive (n=180)  
 3' terminus relative to 3' end of the tRNA (n=180)

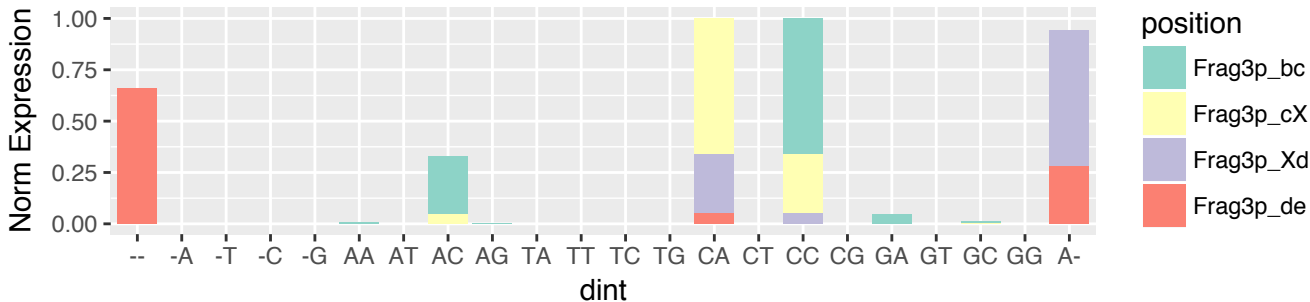

LUAD (n=839)  
 5'-half & exclusive (n=3)  
 5' terminus relative to 5' end of the tRNA (n=3)



LUAD (n=839)  
 5'-half & exclusive (n=3)  
 5' terminus relative to 5' end of the tRNA (n=3)

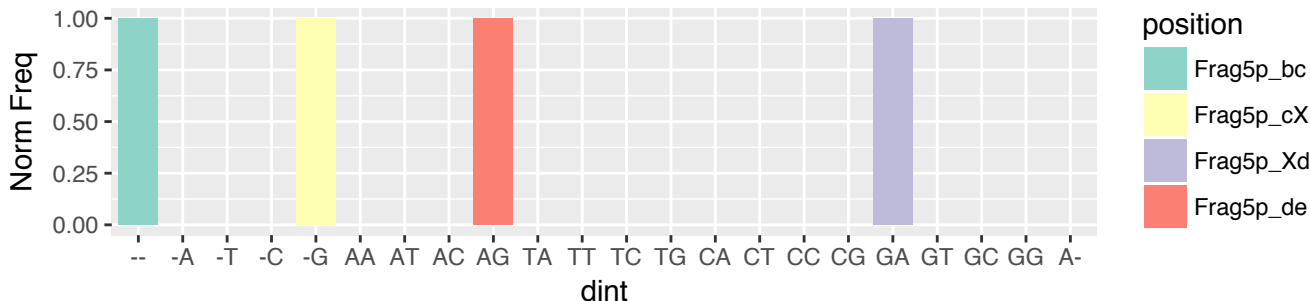

LUAD (n=839)  
 5'-half & exclusive (n=3)  
 5' terminus relative to 5' end of the tRNA (n=3)

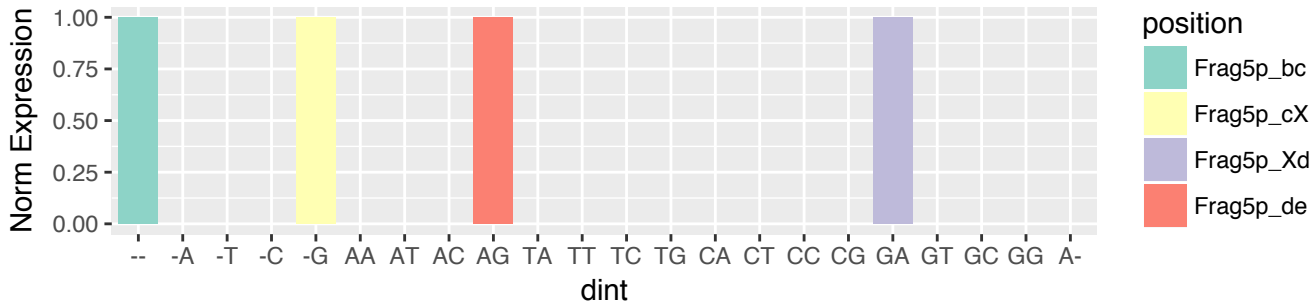

LUAD (n=839)  
 5'-half & exclusive (n=3)  
 3' terminus relative to 5' stem of A-loop (n=3)

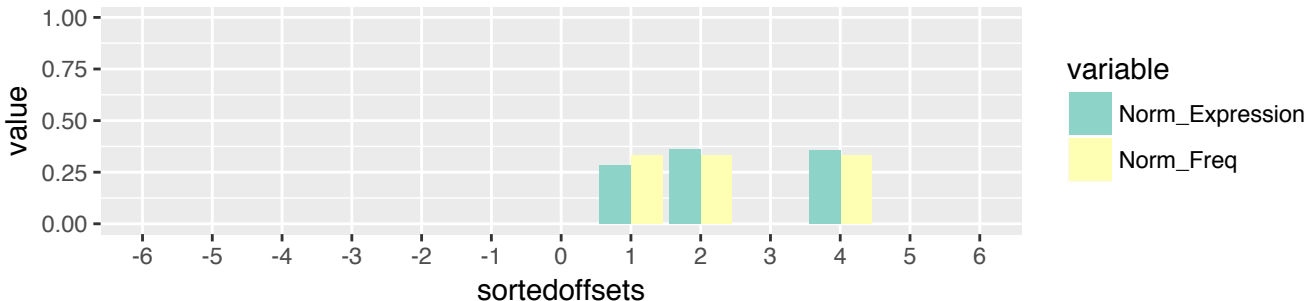

LUAD (n=839)  
 5'-half & exclusive (n=3)  
 3' terminus relative to 5' stem of A-loop (n=3)

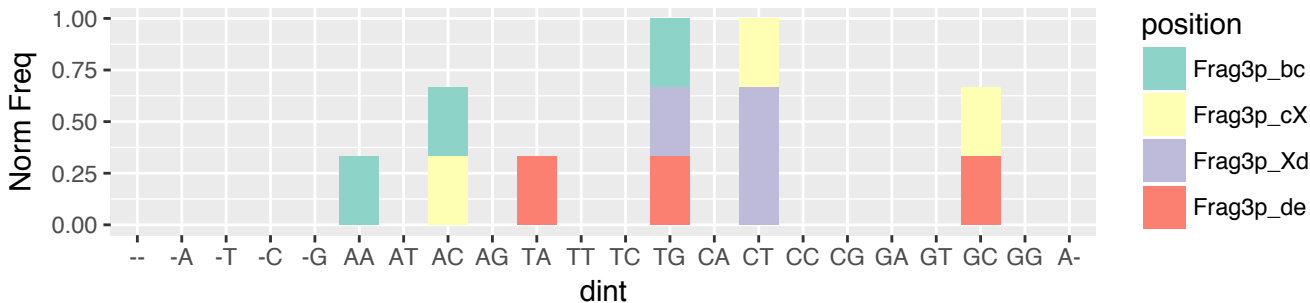

LUAD (n=839)  
 5'-half & exclusive (n=3)  
 3' terminus relative to 5' stem of A-loop (n=3)

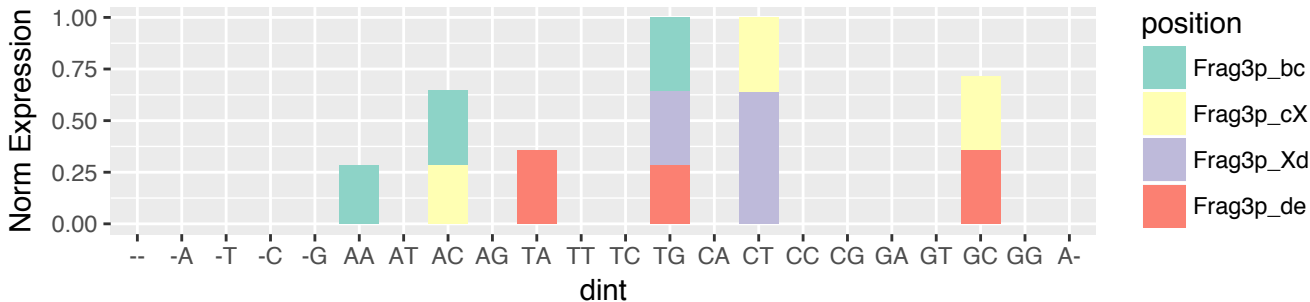

LUAD (n=839)  
 5'-tRF & exclusive (n=139)  
 5' terminus relative to 5' end of the tRNA (n=139)

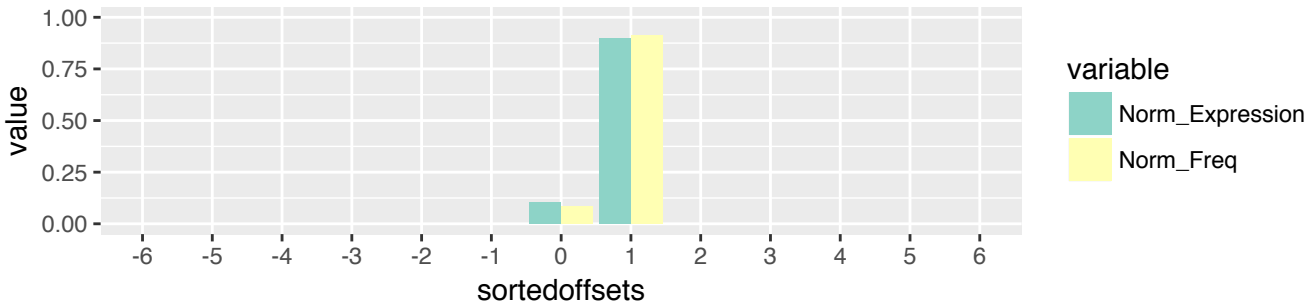

LUAD (n=839)  
 5'-tRF & exclusive (n=139)  
 5' terminus relative to 5' end of the tRNA (n=139)

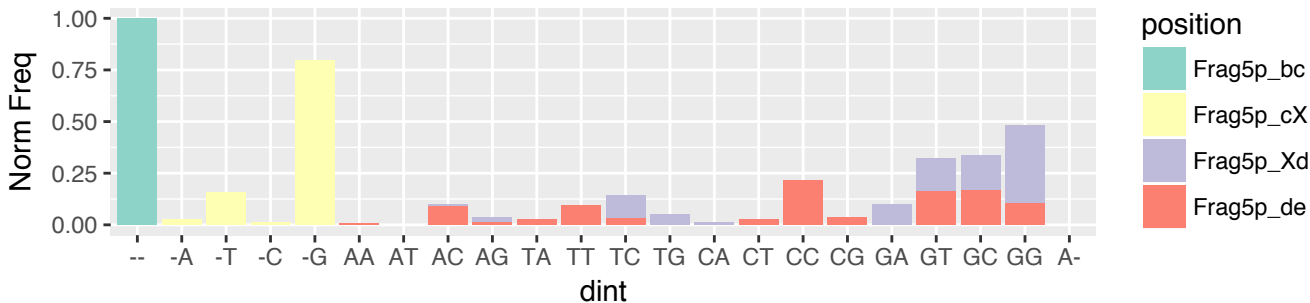

LUAD (n=839)  
 5'-tRF & exclusive (n=139)  
 5' terminus relative to 5' end of the tRNA (n=139)

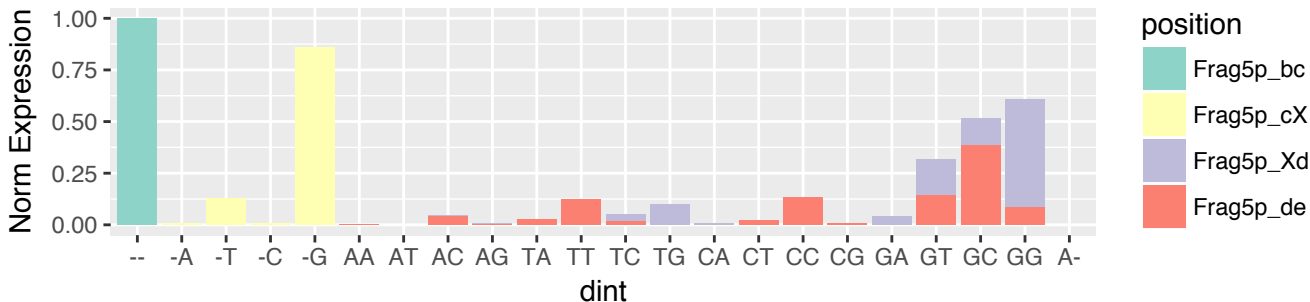

LUAD (n=839)  
 5'-tRF & exclusive (n=139)  
 3' terminus relative to 5' stem of D-loop (n=12)

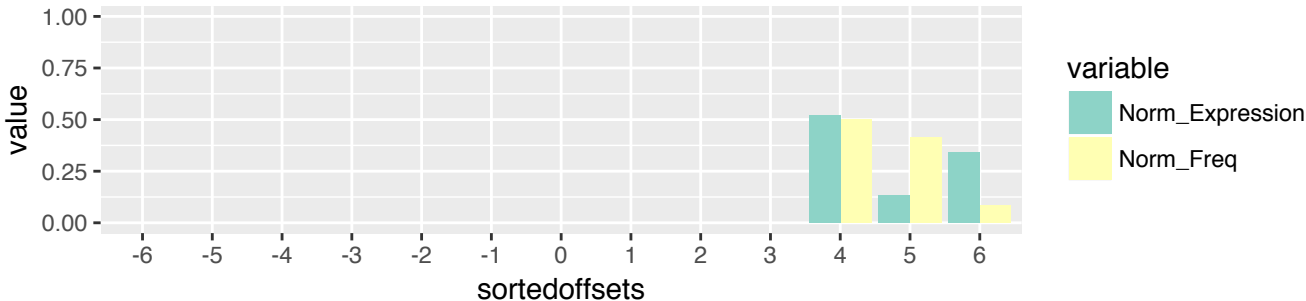

LUAD (n=839)  
 5'-tRF & exclusive (n=139)  
 3' terminus relative to 5' stem of D-loop (n=12)

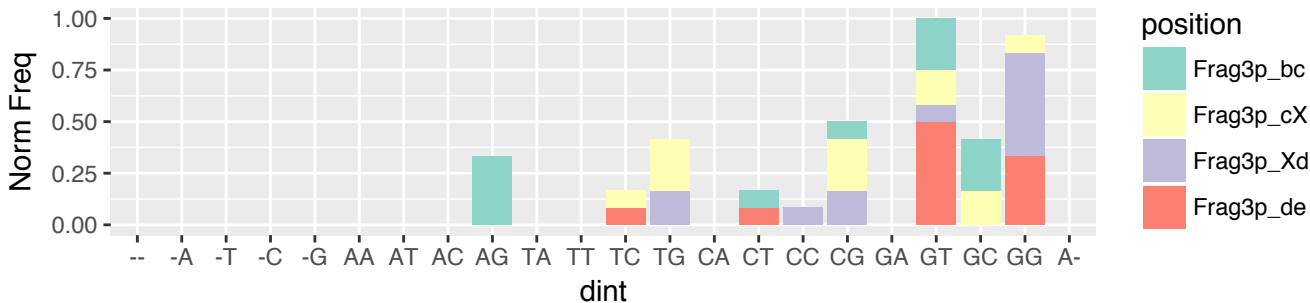

LUAD (n=839)  
 5'-tRF & exclusive (n=139)  
 3' terminus relative to 5' stem of D-loop (n=12)

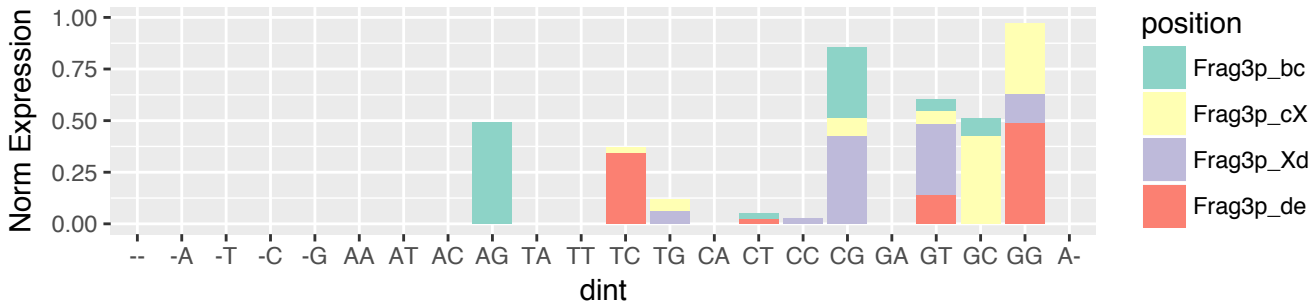

LUAD (n=839)  
 5'-tRF & exclusive (n=139)  
 3' terminus relative to 3' stem of D-loop (n=124)

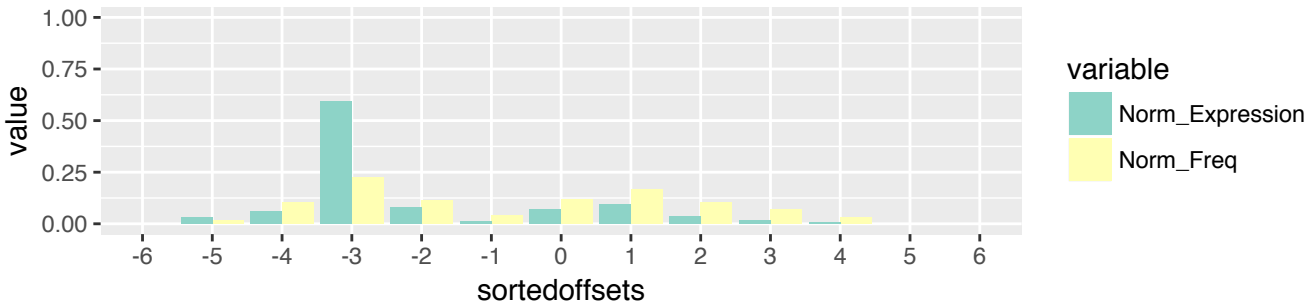

LUAD (n=839)  
 5'-tRF & exclusive (n=139)  
 3' terminus relative to 3' stem of D-loop (n=124)

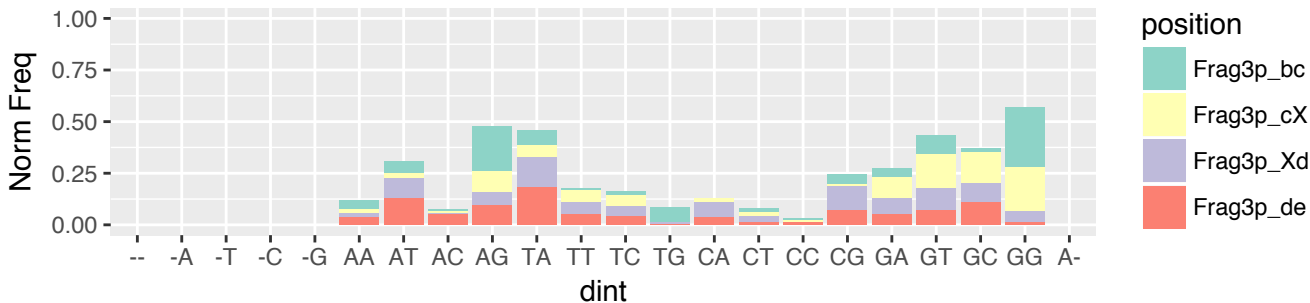

LUAD (n=839)  
 5'-tRF & exclusive (n=139)  
 3' terminus relative to 3' stem of D-loop (n=124)

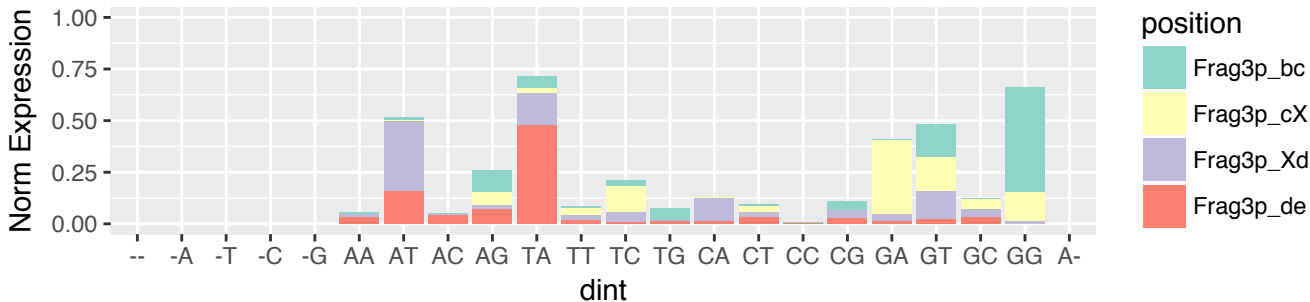

LUAD (n=839)

5'-tRF & exclusive (n=139)

3' terminus relative to 5' stem of A-loop (n=1)

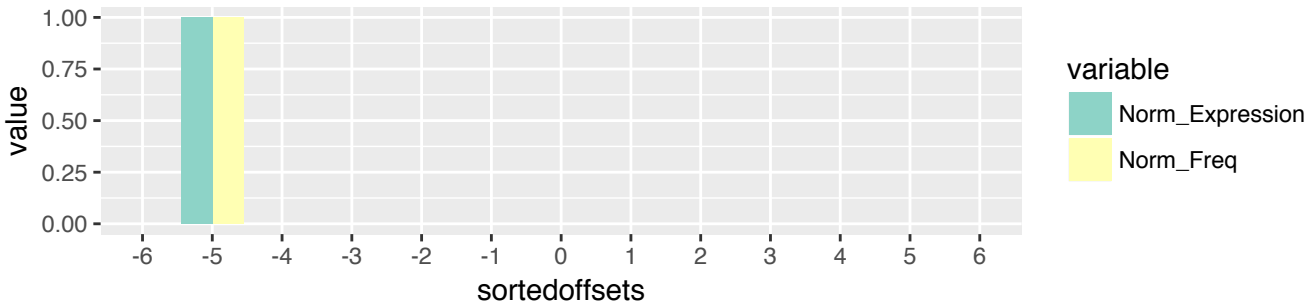

LUAD (n=839)

5'-tRF & exclusive (n=139)

3' terminus relative to 5' stem of A-loop (n=1)

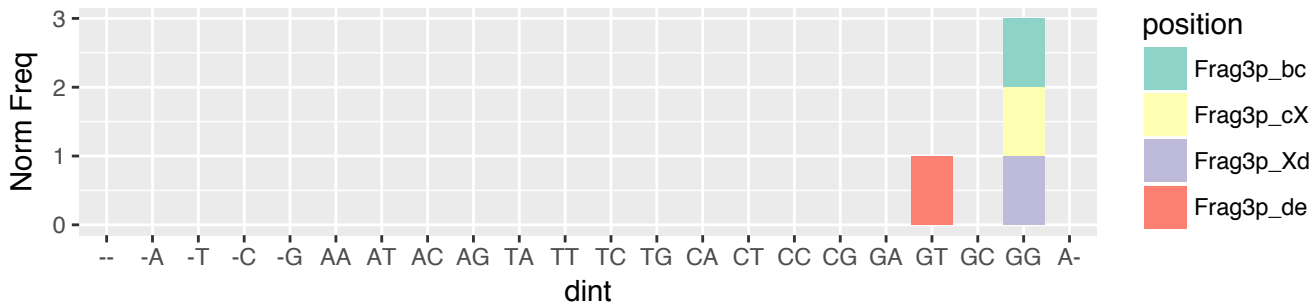

LUAD (n=839)

5'-tRF & exclusive (n=139)

3' terminus relative to 5' stem of A-loop (n=1)

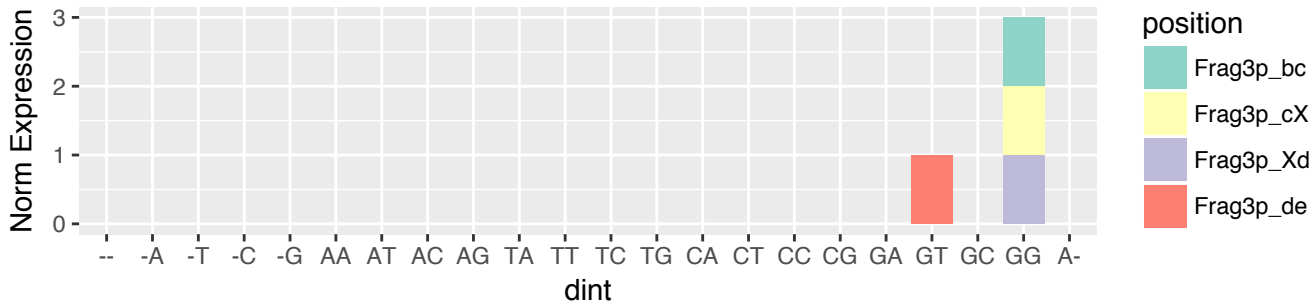

LUAD (n=839)  
 5'-tRF & exclusive (n=139)  
 3' terminus relative to 3' stem of A-loop (n=2)

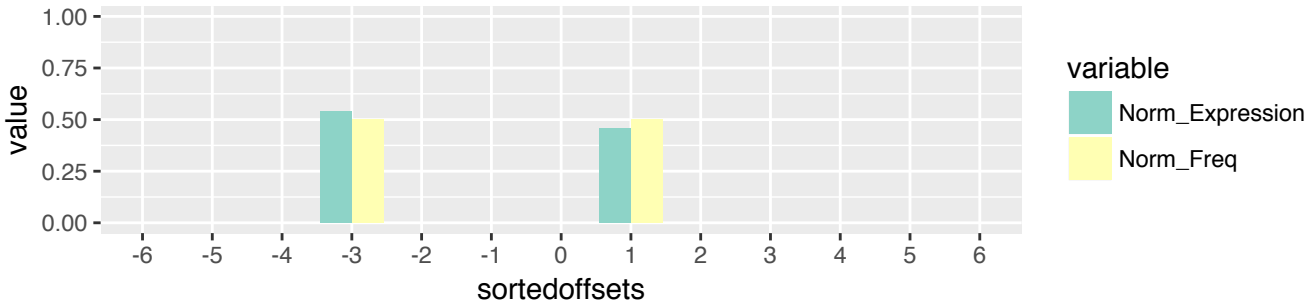

LUAD (n=839)  
 5'-tRF & exclusive (n=139)  
 3' terminus relative to 3' stem of A-loop (n=2)

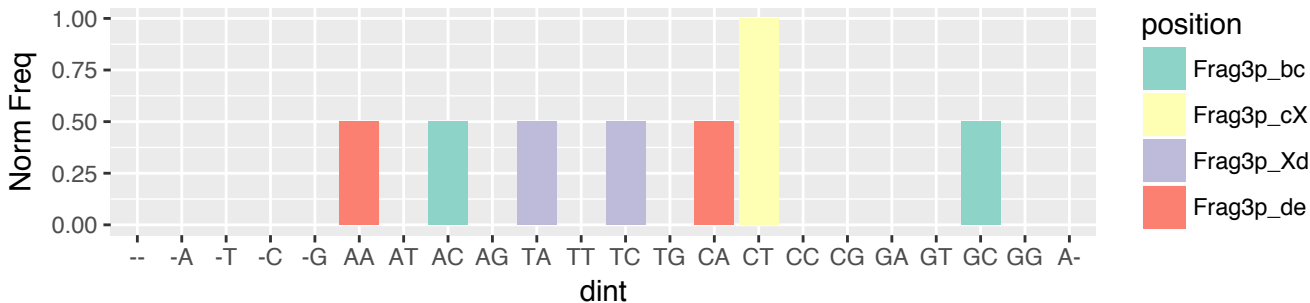

LUAD (n=839)  
 5'-tRF & exclusive (n=139)  
 3' terminus relative to 3' stem of A-loop (n=2)

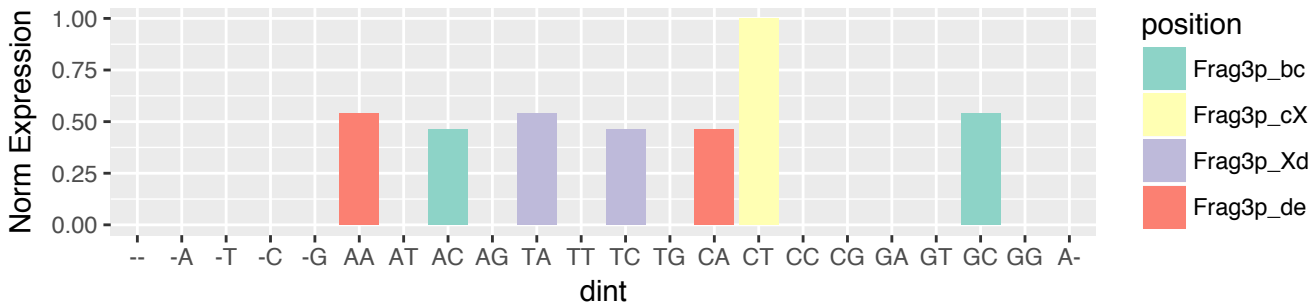



LUAD (n=839)  
 i-tRF & exclusive (n=140)  
 5' terminus relative to 5' stem of D-loop (n=54)

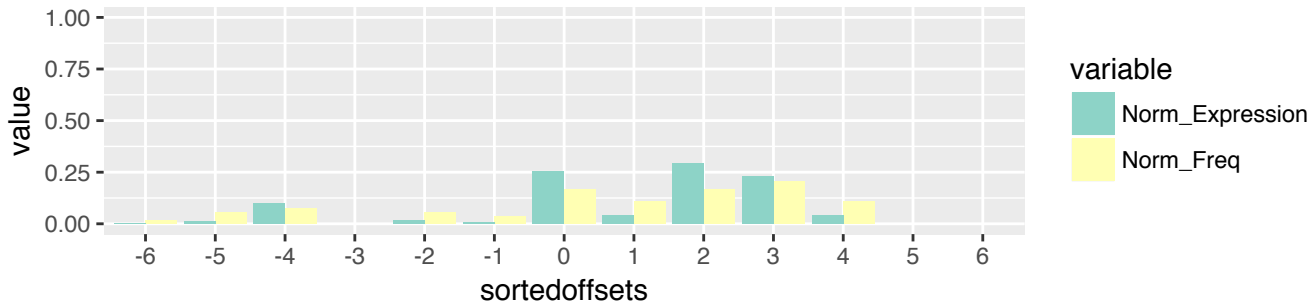

LUAD (n=839)  
 i-tRF & exclusive (n=140)  
 5' terminus relative to 5' stem of D-loop (n=54)

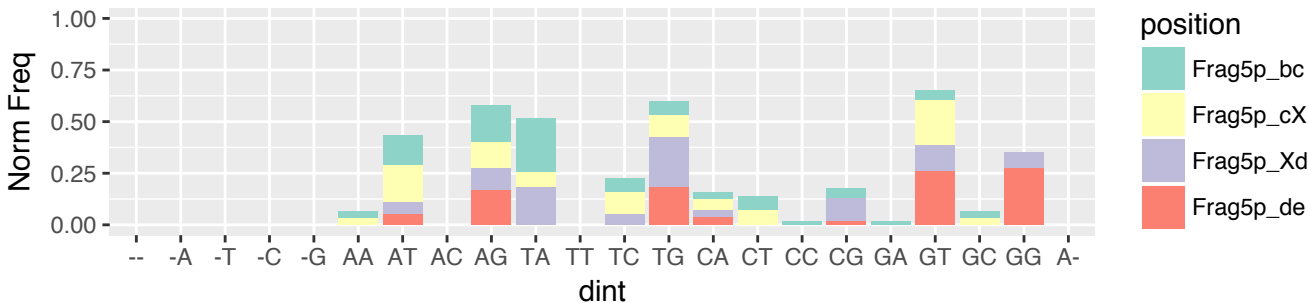

LUAD (n=839)  
 i-tRF & exclusive (n=140)  
 5' terminus relative to 5' stem of D-loop (n=54)

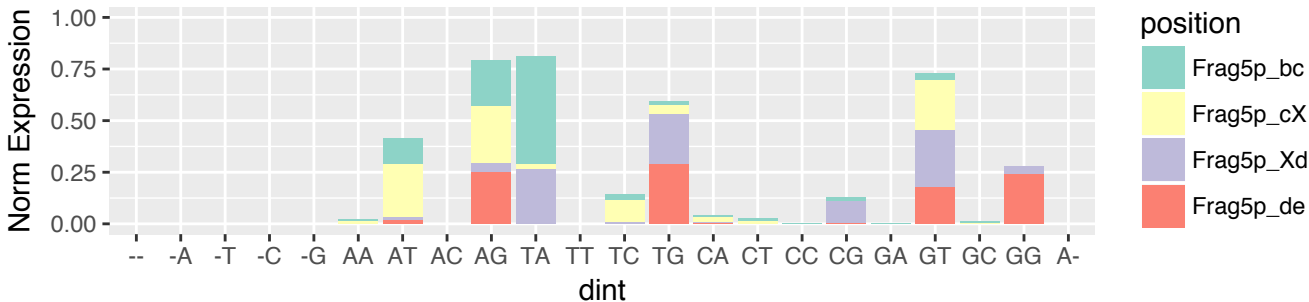

LUAD (n=839)  
 i-tRF & exclusive (n=140)  
 5' terminus relative to 3' stem of D-loop (n=6)

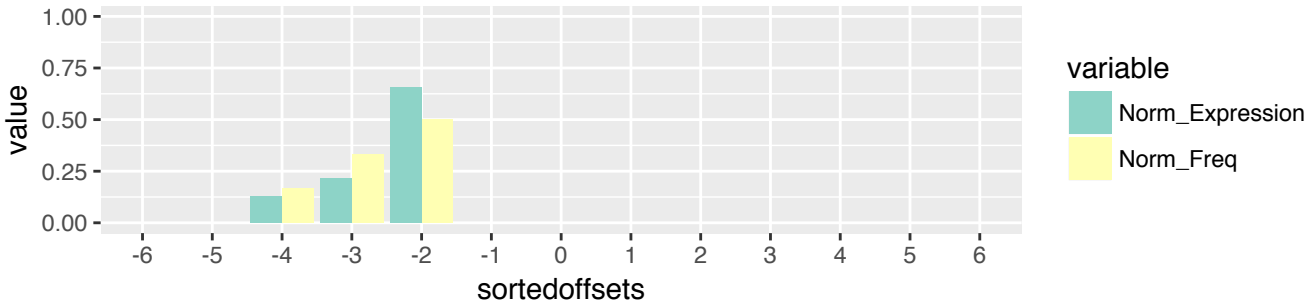

LUAD (n=839)  
 i-tRF & exclusive (n=140)  
 5' terminus relative to 3' stem of D-loop (n=6)

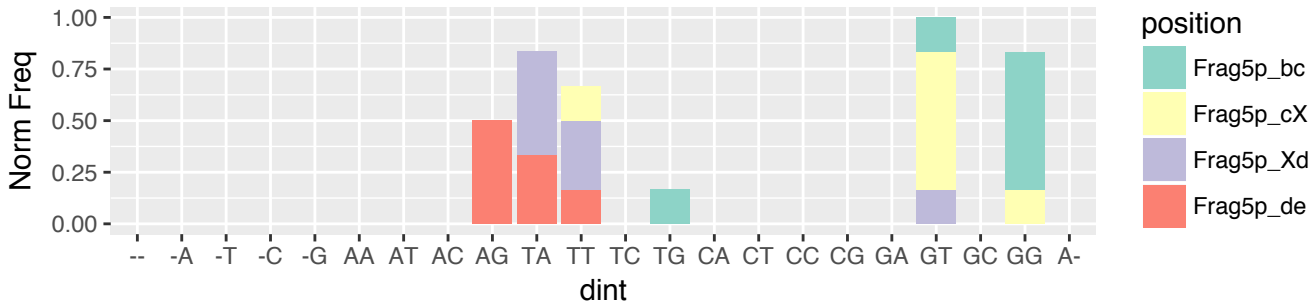

LUAD (n=839)  
 i-tRF & exclusive (n=140)  
 5' terminus relative to 3' stem of D-loop (n=6)

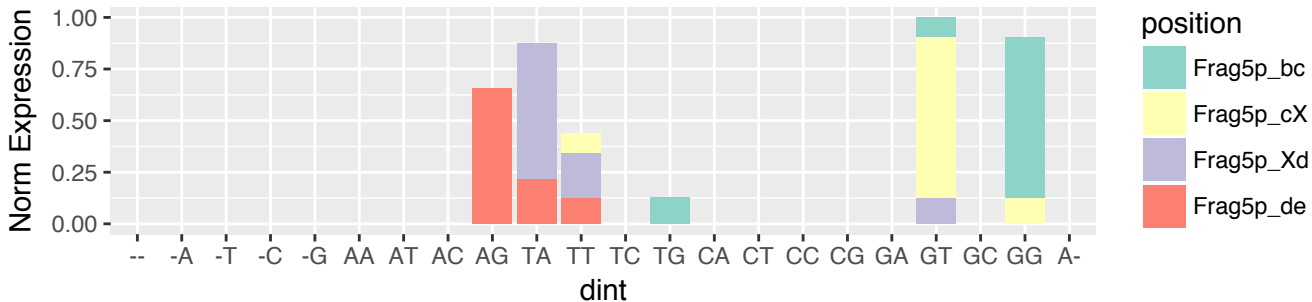

LUAD (n=839)  
i-tRF & exclusive (n=140)  
5' terminus relative to 5' stem of A-loop (n=37)

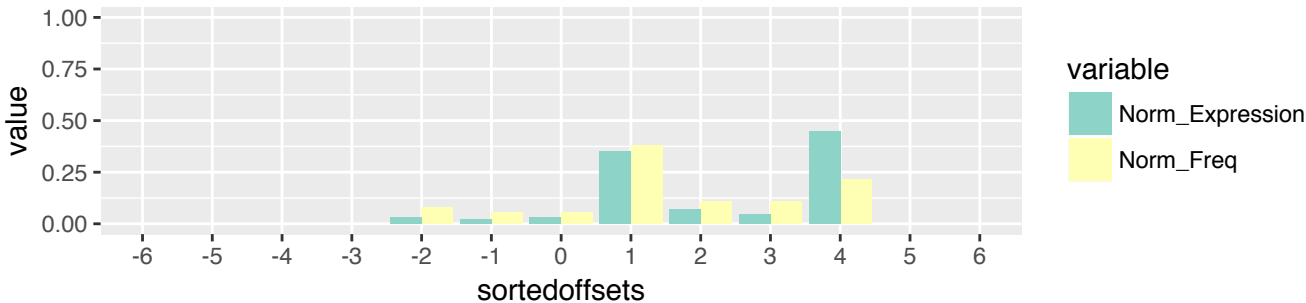

LUAD (n=839)  
i-tRF & exclusive (n=140)  
5' terminus relative to 5' stem of A-loop (n=37)

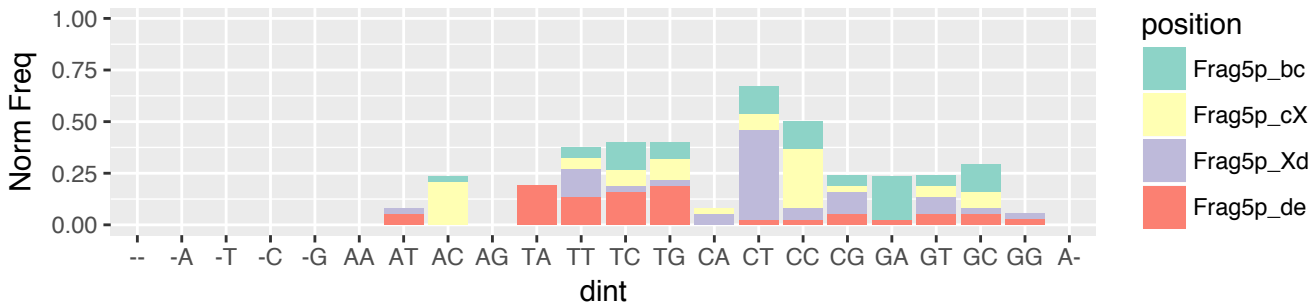

LUAD (n=839)  
i-tRF & exclusive (n=140)  
5' terminus relative to 5' stem of A-loop (n=37)

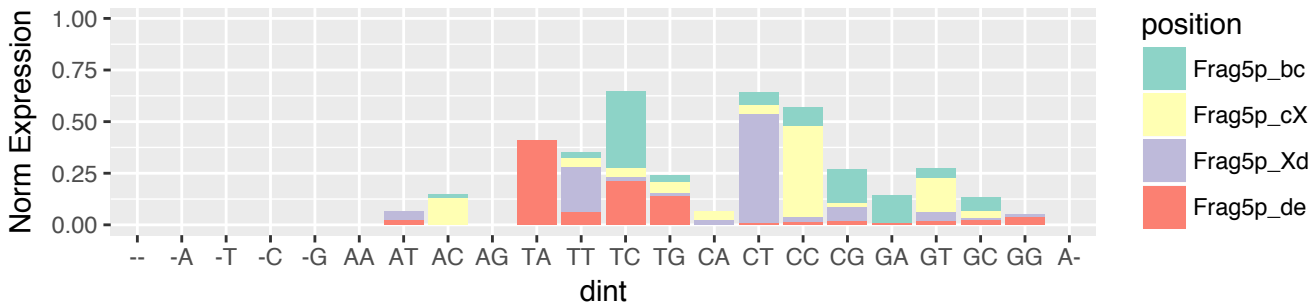

LUAD (n=839)  
i-tRF & exclusive (n=140)  
5' terminus relative to 3' stem of A-loop (n=37)

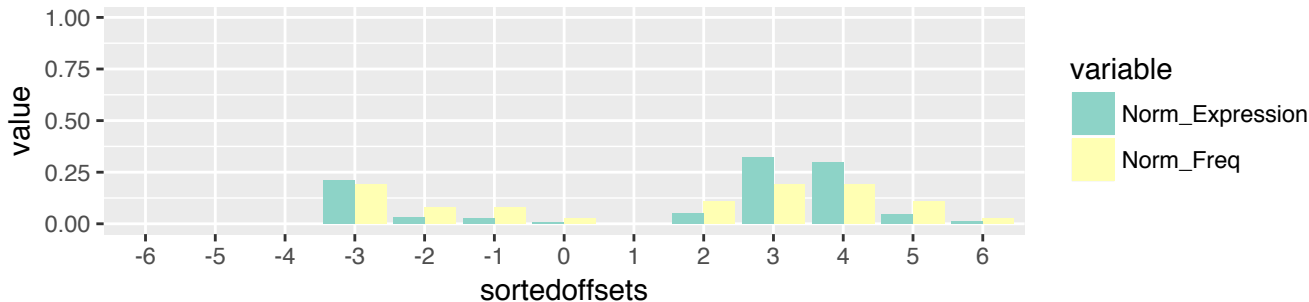

LUAD (n=839)  
i-tRF & exclusive (n=140)  
5' terminus relative to 3' stem of A-loop (n=37)

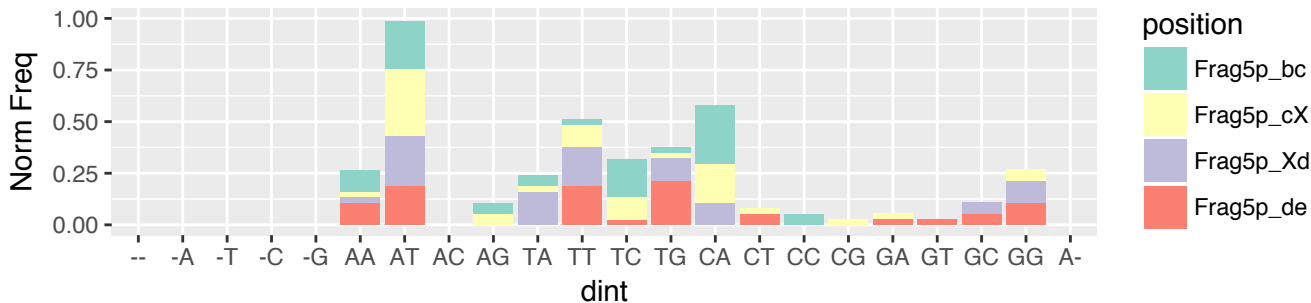

LUAD (n=839)  
i-tRF & exclusive (n=140)  
5' terminus relative to 3' stem of A-loop (n=37)

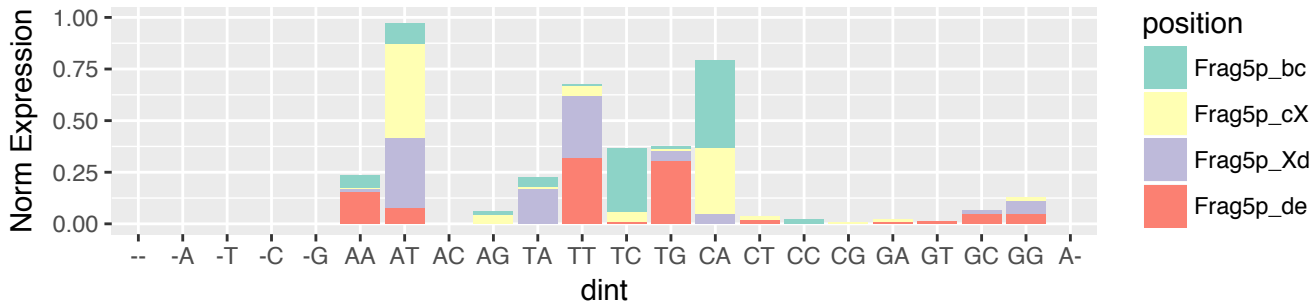

LUAD (n=839)  
i-tRF & exclusive (n=140)  
5' terminus relative to 5' stem of T-loop (n=6)

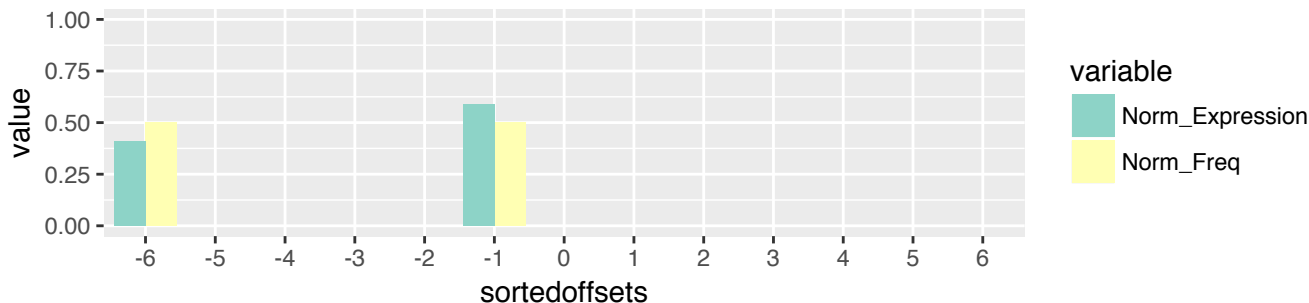

LUAD (n=839)  
i-tRF & exclusive (n=140)  
5' terminus relative to 5' stem of T-loop (n=6)

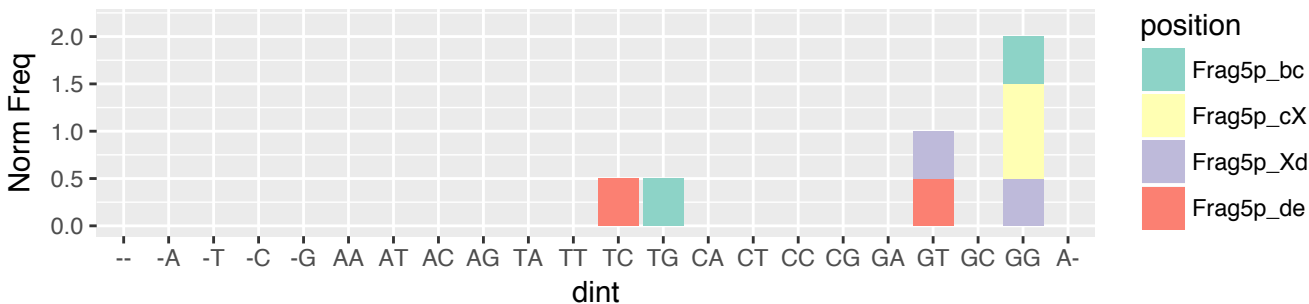

LUAD (n=839)  
i-tRF & exclusive (n=140)  
5' terminus relative to 5' stem of T-loop (n=6)

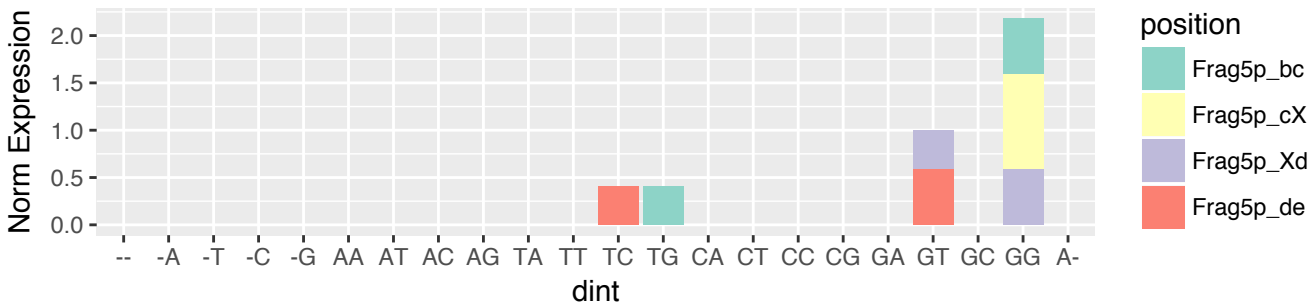

LUAD (n=839)  
 i-tRF & exclusive (n=140)  
 3' terminus relative to 5' stem of A-loop (n=49)

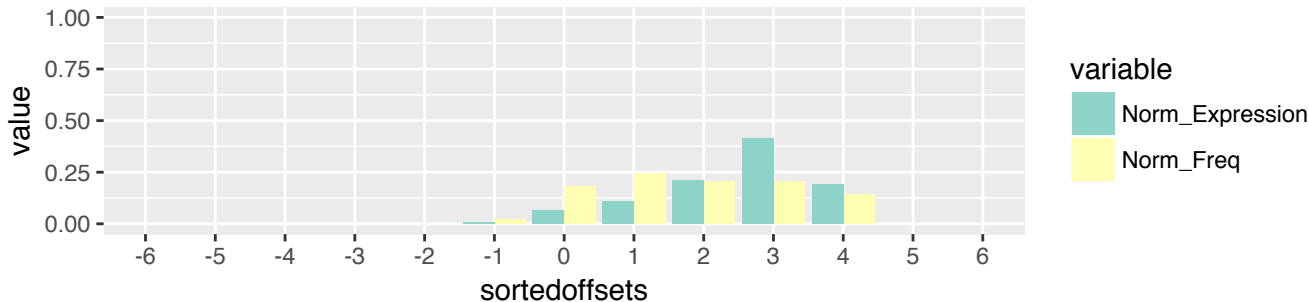

LUAD (n=839)  
 i-tRF & exclusive (n=140)  
 3' terminus relative to 5' stem of A-loop (n=49)

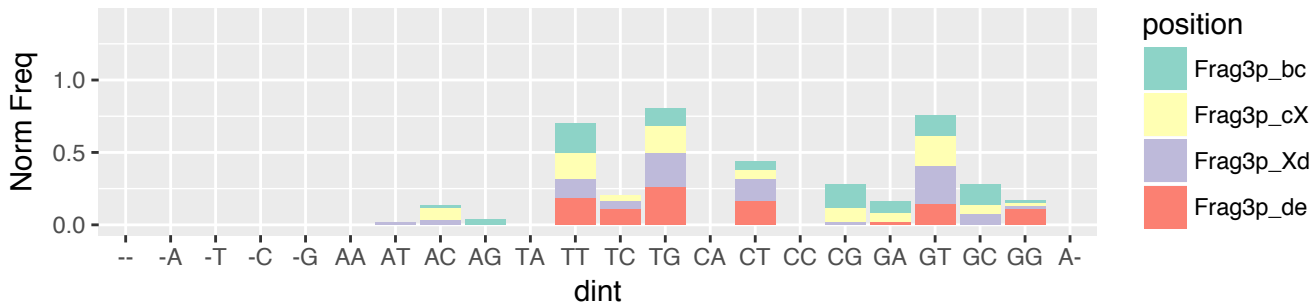

LUAD (n=839)  
 i-tRF & exclusive (n=140)  
 3' terminus relative to 5' stem of A-loop (n=49)

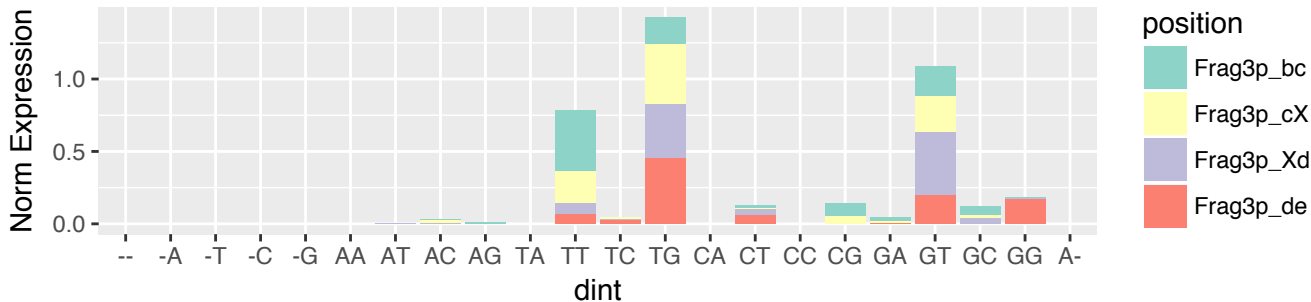

LUAD (n=839)  
 i-tRF & exclusive (n=140)  
 3' terminus relative to 3' stem of A-loop (n=18)

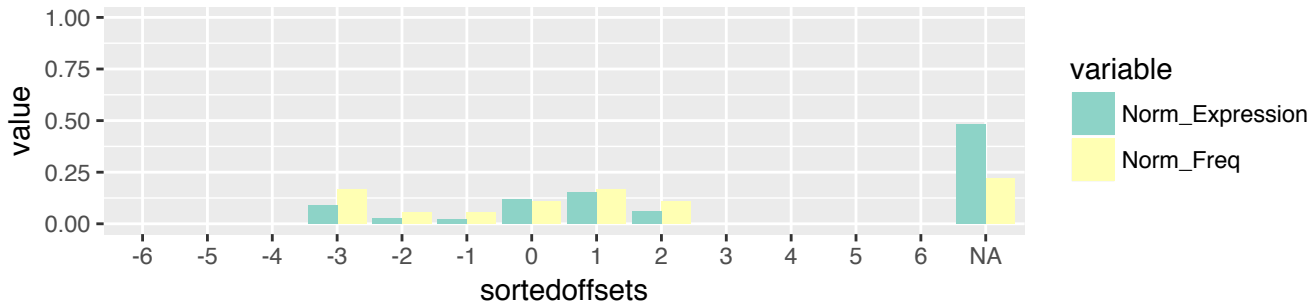

LUAD (n=839)  
 i-tRF & exclusive (n=140)  
 3' terminus relative to 3' stem of A-loop (n=18)

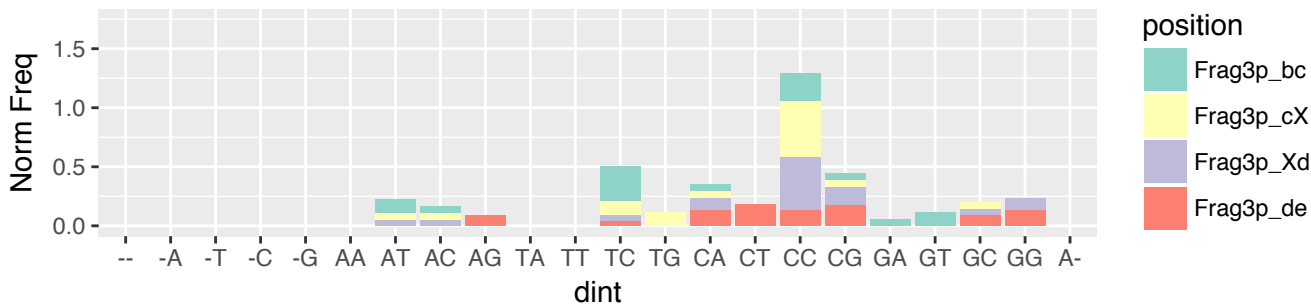

LUAD (n=839)  
 i-tRF & exclusive (n=140)  
 3' terminus relative to 3' stem of A-loop (n=18)

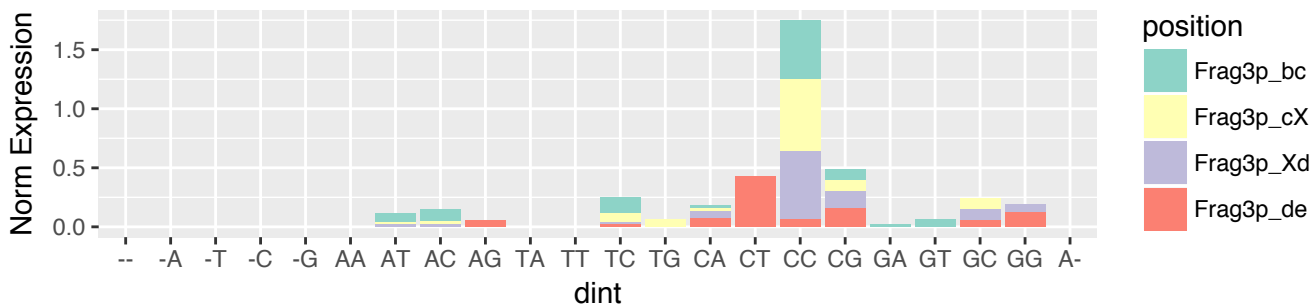

LUAD (n=839)  
i-tRF & exclusive (n=140)  
3' terminus relative to 5' stem of T-loop (n=39)

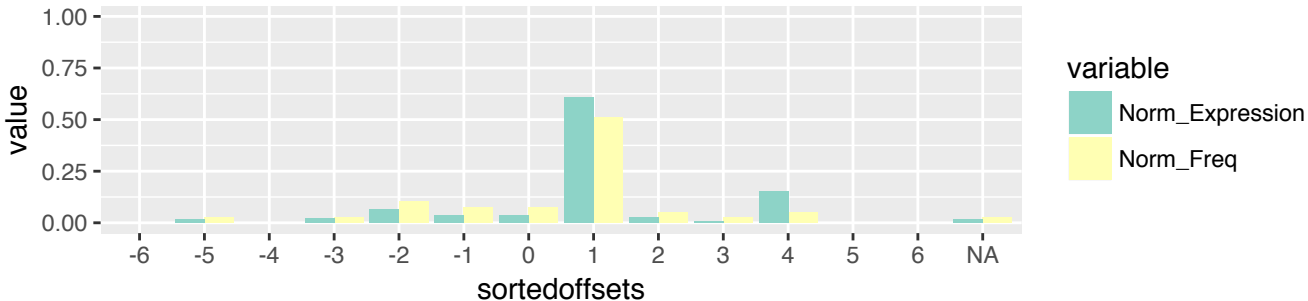

LUAD (n=839)  
i-tRF & exclusive (n=140)  
3' terminus relative to 5' stem of T-loop (n=39)

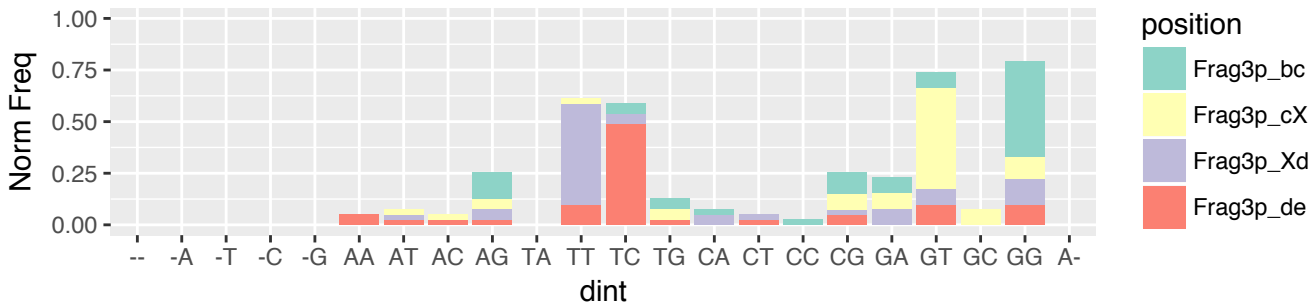

LUAD (n=839)  
i-tRF & exclusive (n=140)  
3' terminus relative to 5' stem of T-loop (n=39)

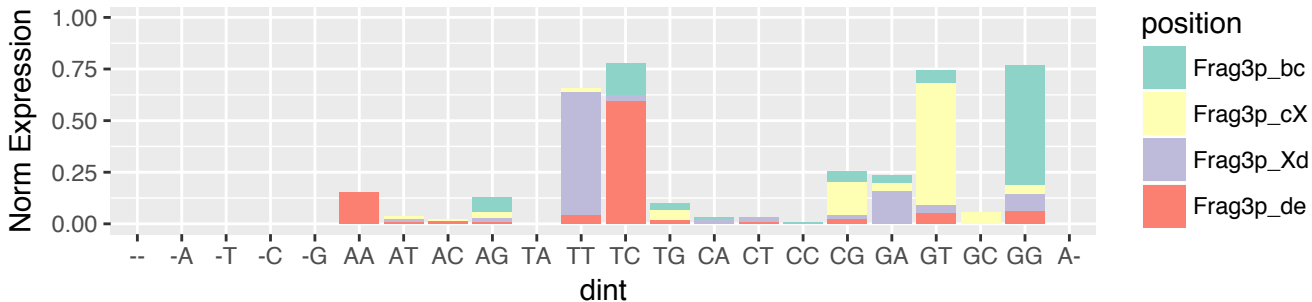



LUAD (n=839)  
i-tRF & exclusive (n=140)  
3' terminus relative to 3' stem of T-loop (n=30)

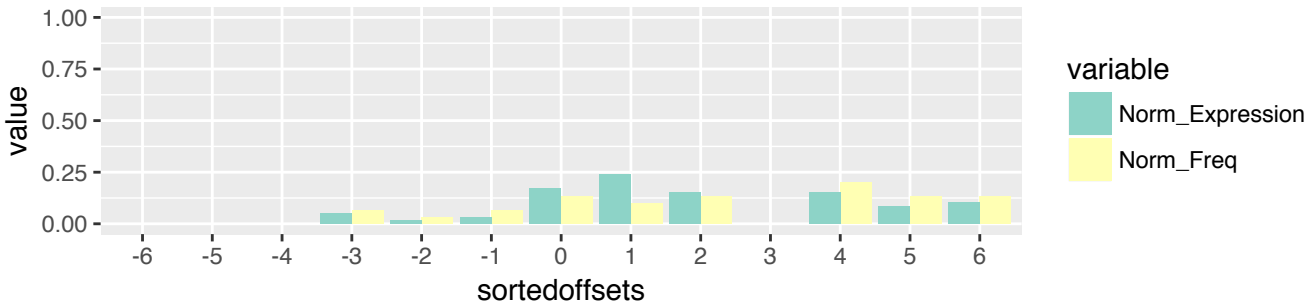

LUAD (n=839)  
i-tRF & exclusive (n=140)  
3' terminus relative to 3' stem of T-loop (n=30)

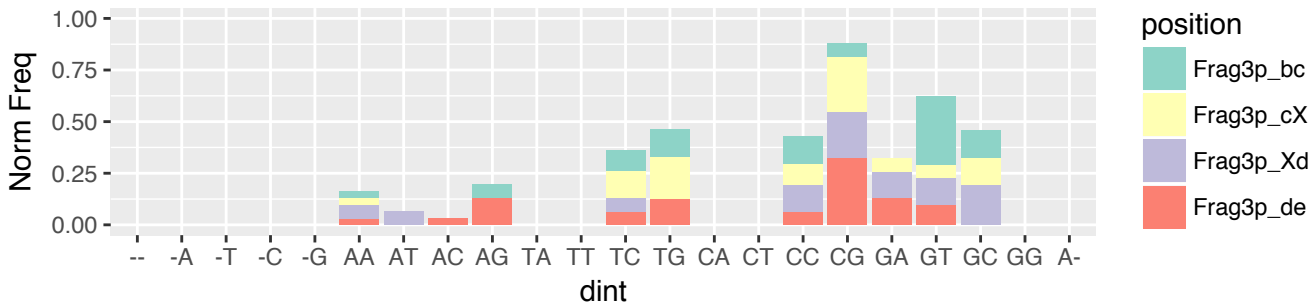

LUAD (n=839)  
i-tRF & exclusive (n=140)  
3' terminus relative to 3' stem of T-loop (n=30)

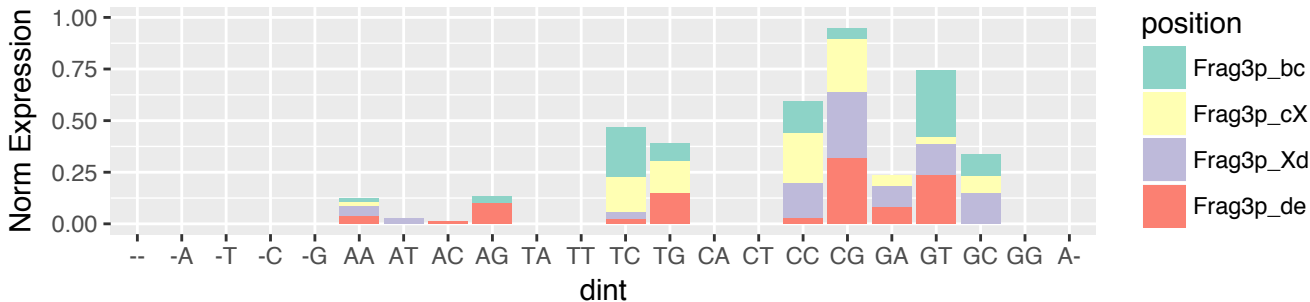

LUAD (n=839)  
 i-tRF & exclusive (n=140)  
 3' terminus relative to 3' end of the tRNA (n=5)

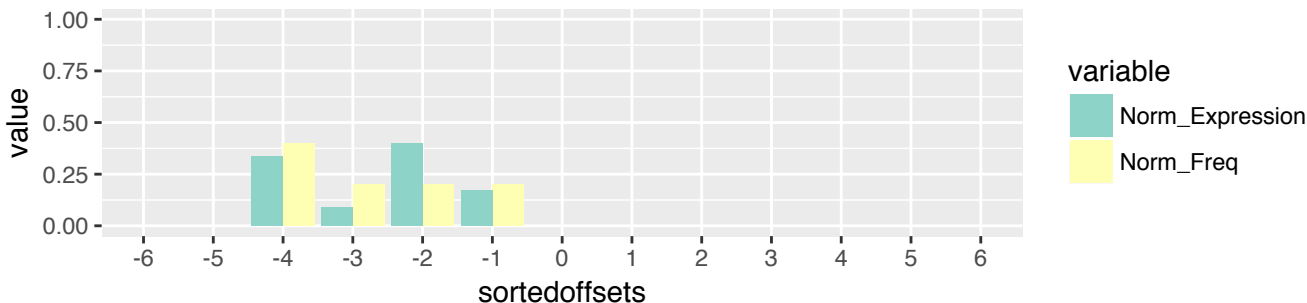

LUAD (n=839)  
 i-tRF & exclusive (n=140)  
 3' terminus relative to 3' end of the tRNA (n=5)

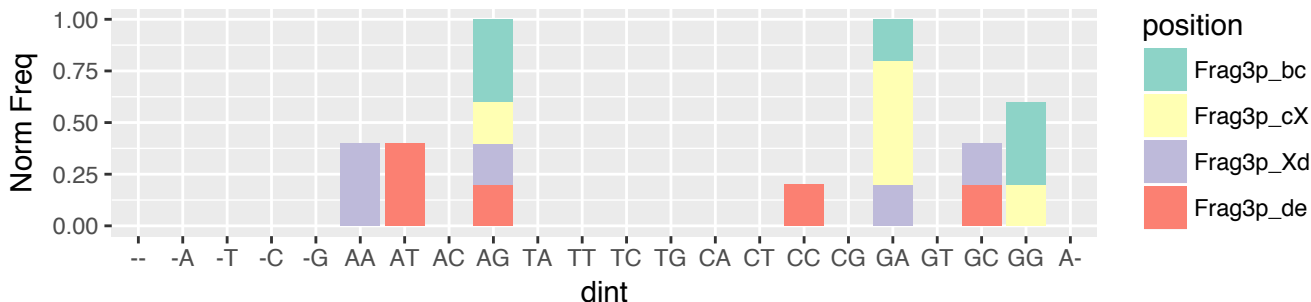

LUAD (n=839)  
 i-tRF & exclusive (n=140)  
 3' terminus relative to 3' end of the tRNA (n=5)

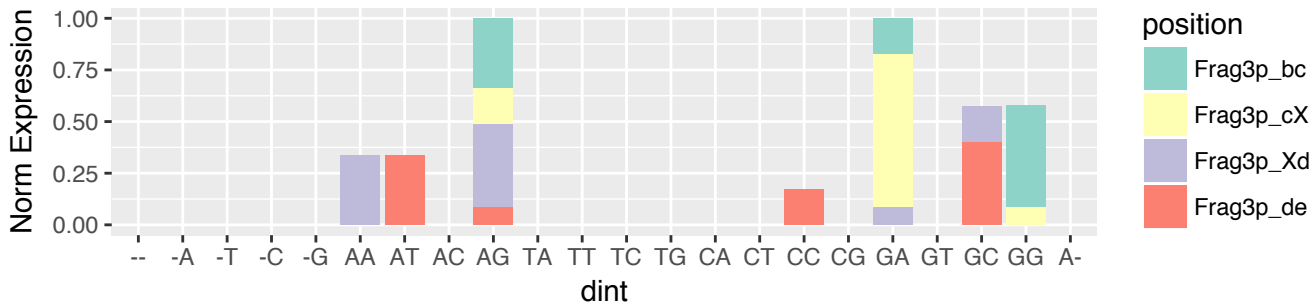

LUAD (n=839)  
 3'-tRF & exclusive (n=173)  
 5' terminus relative to 5' stem of T-loop (n=103)

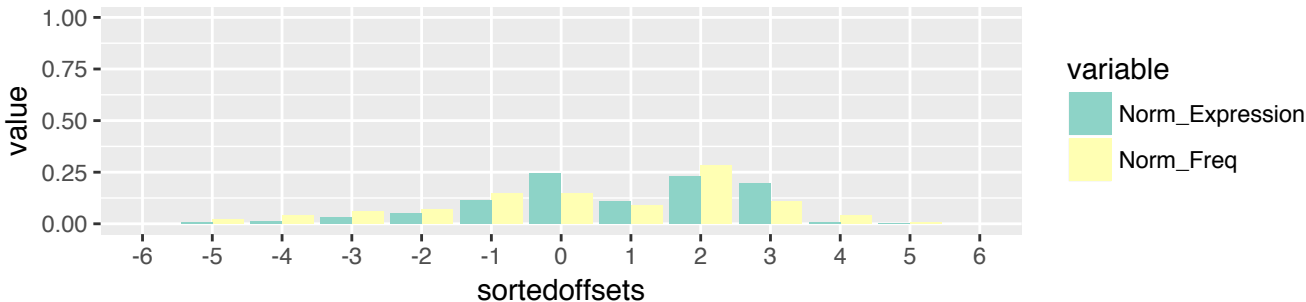

LUAD (n=839)  
 3'-tRF & exclusive (n=173)  
 5' terminus relative to 5' stem of T-loop (n=103)

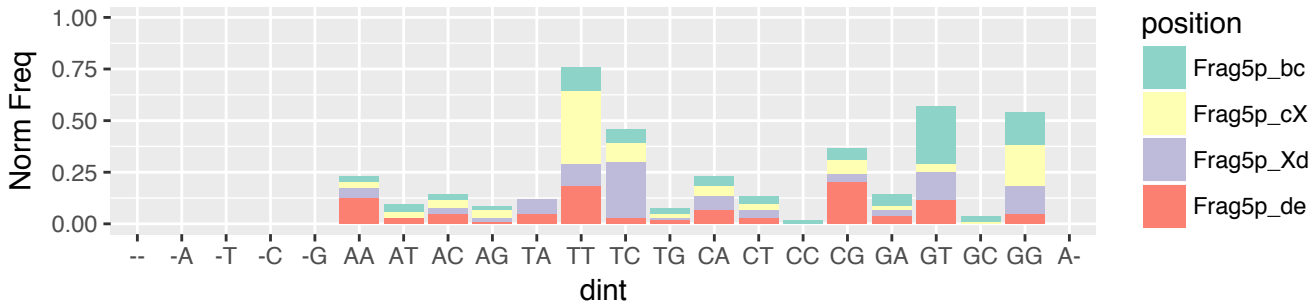

LUAD (n=839)  
 3'-tRF & exclusive (n=173)  
 5' terminus relative to 5' stem of T-loop (n=103)

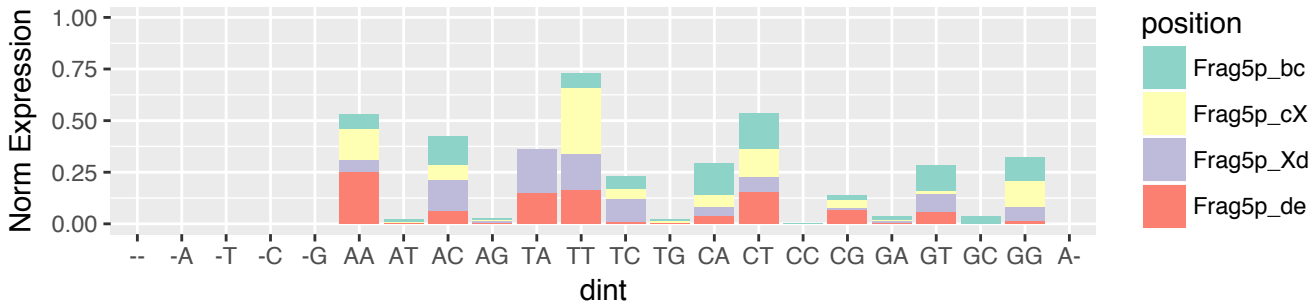

LUAD (n=839)  
 3'-tRF & exclusive (n=173)  
 5' terminus relative to 3' stem of T-loop (n=70)

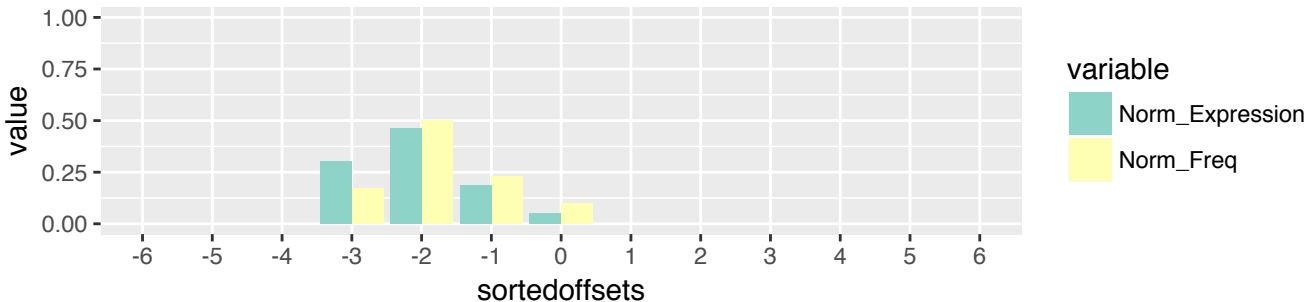

LUAD (n=839)  
 3'-tRF & exclusive (n=173)  
 5' terminus relative to 3' stem of T-loop (n=70)

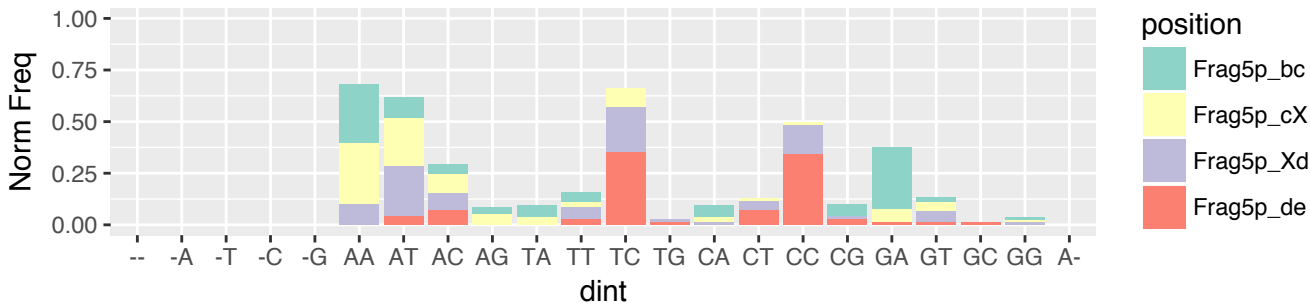

LUAD (n=839)  
 3'-tRF & exclusive (n=173)  
 5' terminus relative to 3' stem of T-loop (n=70)

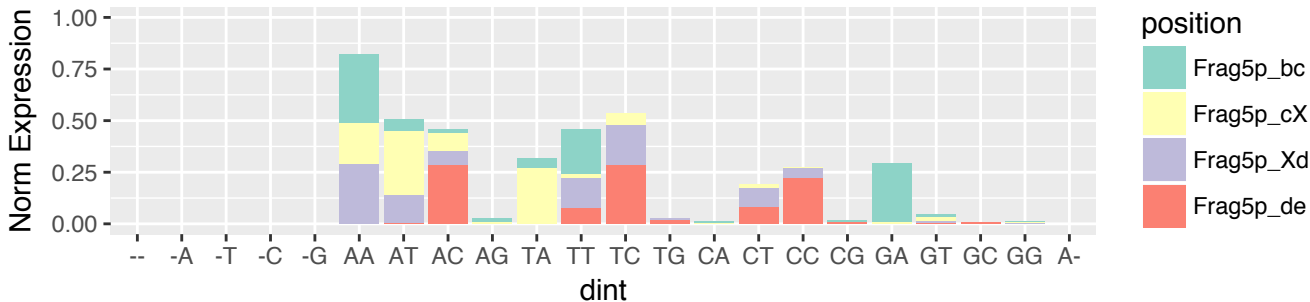

LUAD (n=839)  
 3'-tRF & exclusive (n=173)  
 3' terminus relative to 3' end of the tRNA (n=173)

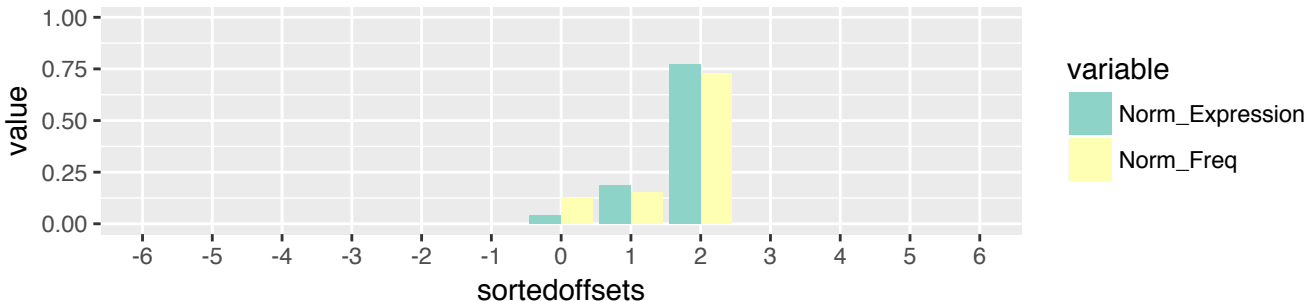

LUAD (n=839)  
 3'-tRF & exclusive (n=173)  
 3' terminus relative to 3' end of the tRNA (n=173)

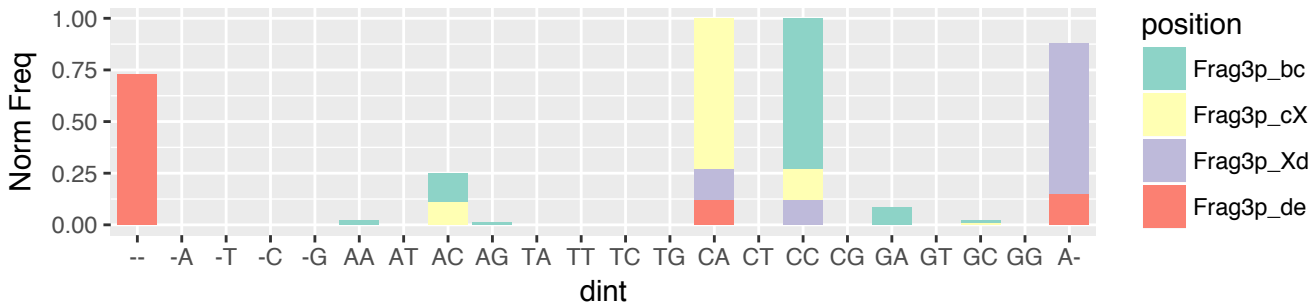

LUAD (n=839)  
 3'-tRF & exclusive (n=173)  
 3' terminus relative to 3' end of the tRNA (n=173)

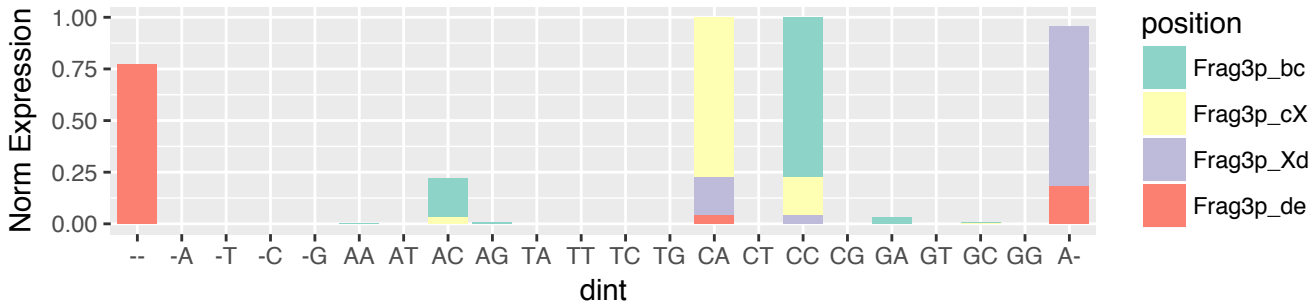

LUSC (n=1160)  
5'-half & exclusive (n=4)  
5' terminus relative to 5' end of the tRNA (n=4)



LUSC (n=1160)  
5'-half & exclusive (n=4)  
5' terminus relative to 5' end of the tRNA (n=4)



LUSC (n=1160)  
5'-half & exclusive (n=4)  
5' terminus relative to 5' end of the tRNA (n=4)

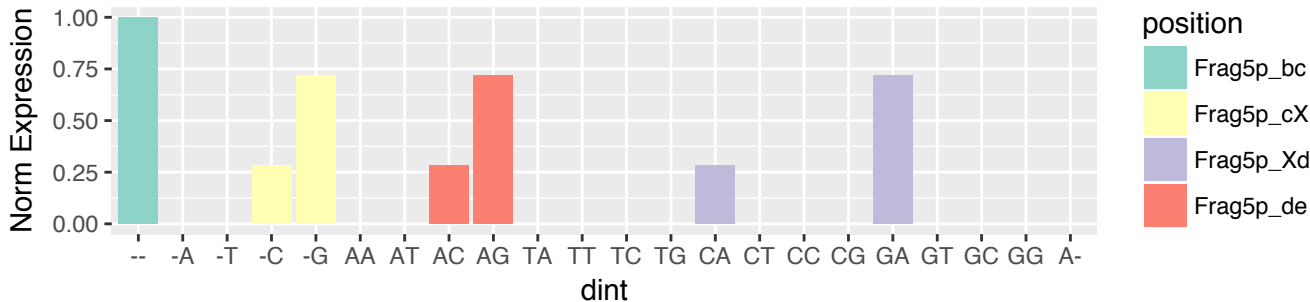

LUSC (n=1160)  
 5'-half & exclusive (n=4)  
 3' terminus relative to 5' stem of A-loop (n=4)

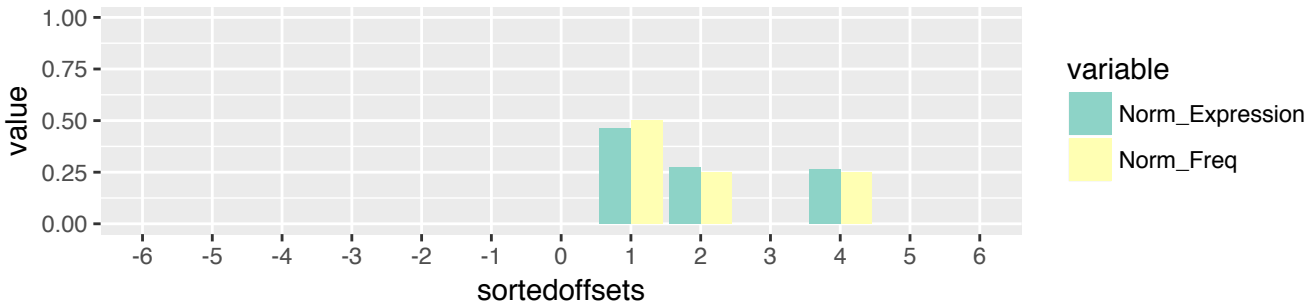

LUSC (n=1160)  
 5'-half & exclusive (n=4)  
 3' terminus relative to 5' stem of A-loop (n=4)



LUSC (n=1160)  
 5'-half & exclusive (n=4)  
 3' terminus relative to 5' stem of A-loop (n=4)

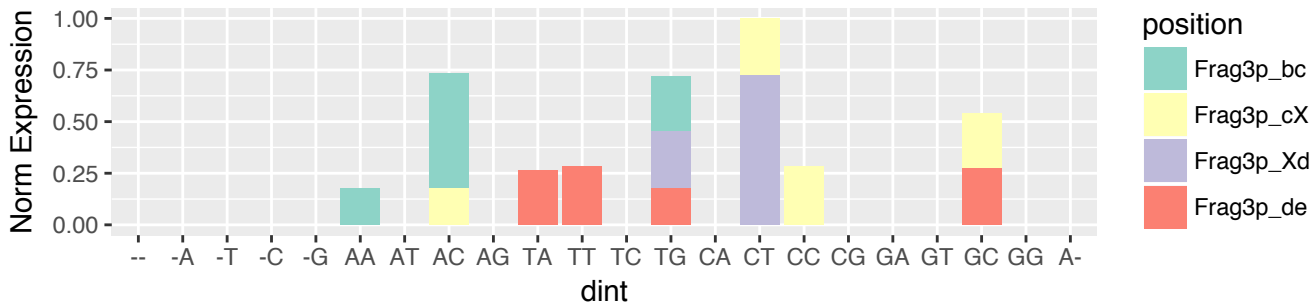

LUSC (n=1160)  
 5'-tRF & exclusive (n=180)  
 5' terminus relative to 5' end of the tRNA (n=180)

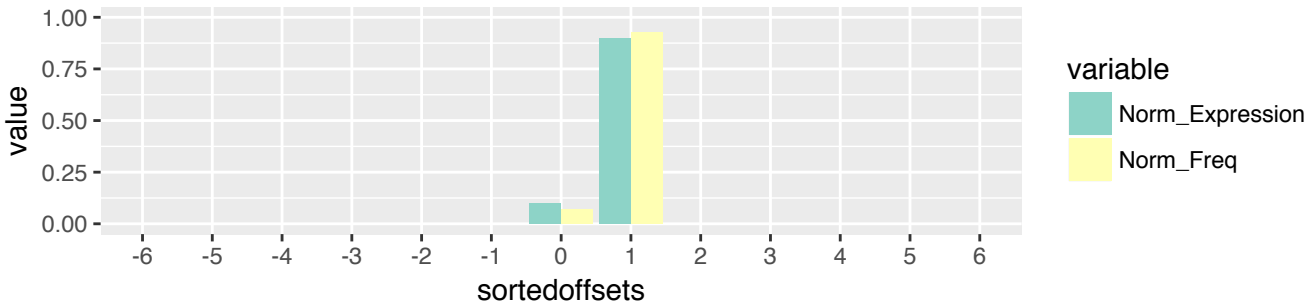

LUSC (n=1160)  
 5'-tRF & exclusive (n=180)  
 5' terminus relative to 5' end of the tRNA (n=180)

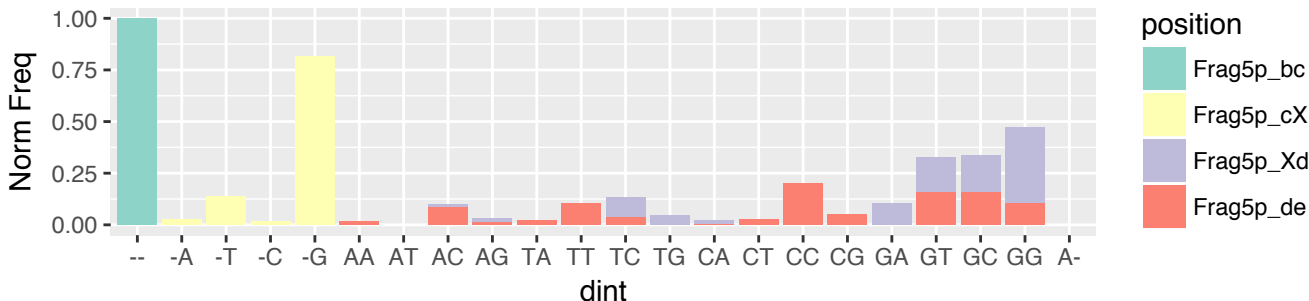

LUSC (n=1160)  
 5'-tRF & exclusive (n=180)  
 5' terminus relative to 5' end of the tRNA (n=180)

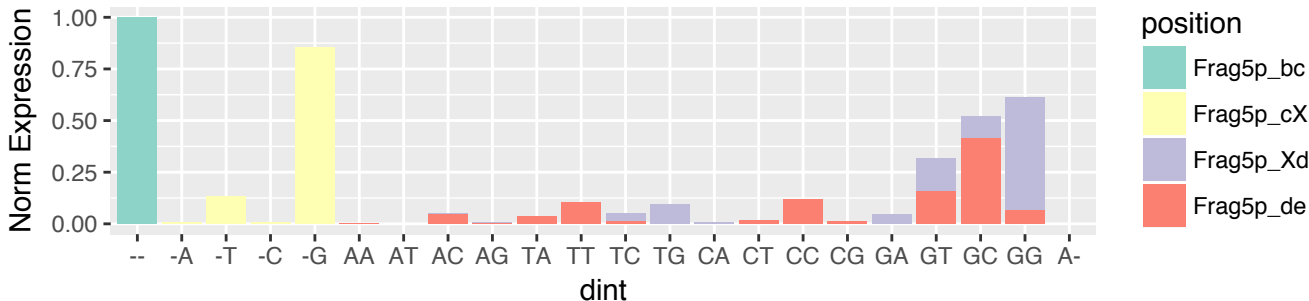



LUSC (n=1160)  
 5'-tRF & exclusive (n=180)  
 3' terminus relative to 5' stem of D-loop (n=17)

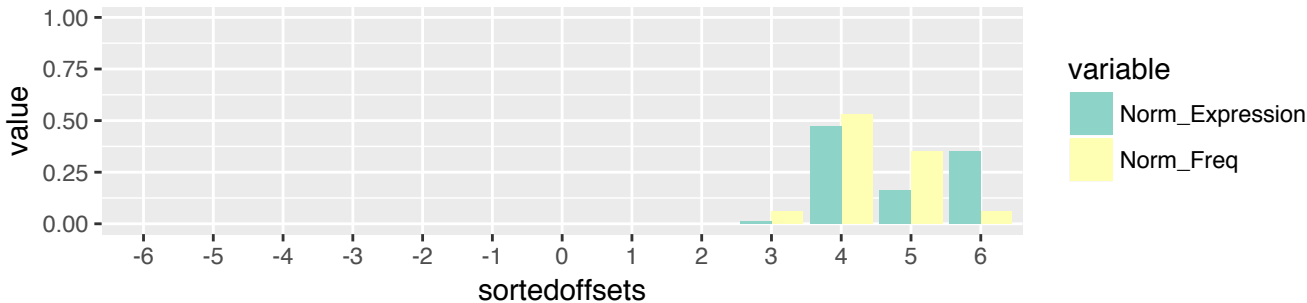

LUSC (n=1160)  
 5'-tRF & exclusive (n=180)  
 3' terminus relative to 5' stem of D-loop (n=17)

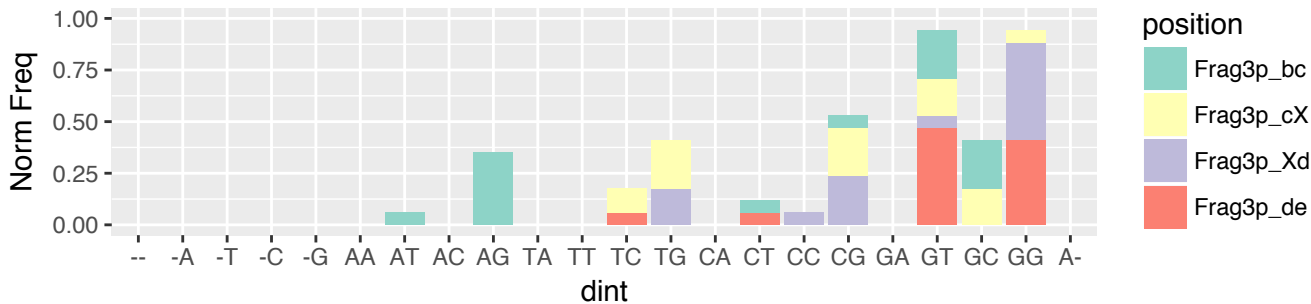

LUSC (n=1160)  
 5'-tRF & exclusive (n=180)  
 3' terminus relative to 5' stem of D-loop (n=17)

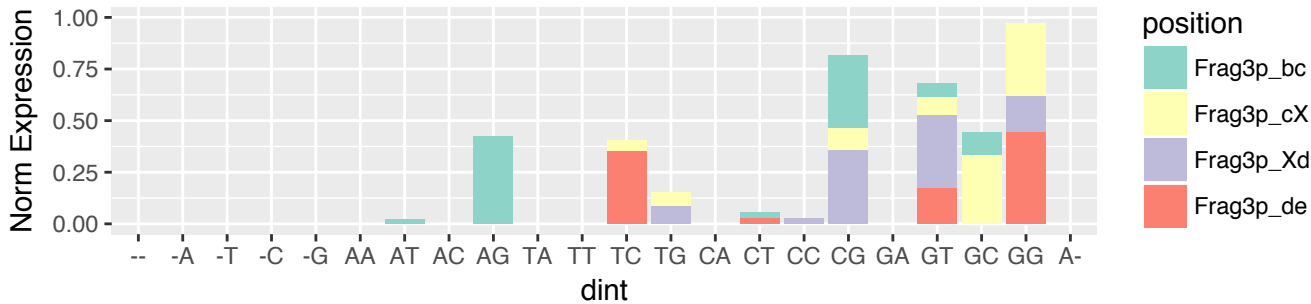

LUSC (n=1160)  
 5'-tRF & exclusive (n=180)  
 3' terminus relative to 3' stem of D-loop (n=153)

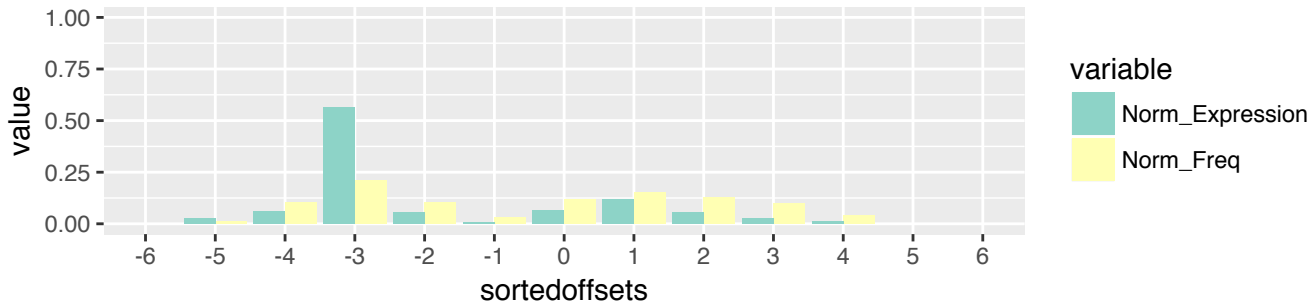

LUSC (n=1160)  
 5'-tRF & exclusive (n=180)  
 3' terminus relative to 3' stem of D-loop (n=153)

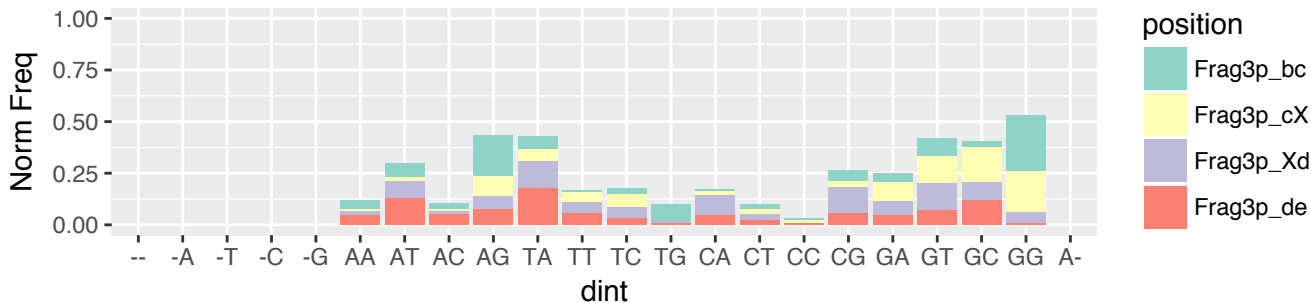

LUSC (n=1160)  
 5'-tRF & exclusive (n=180)  
 3' terminus relative to 3' stem of D-loop (n=153)

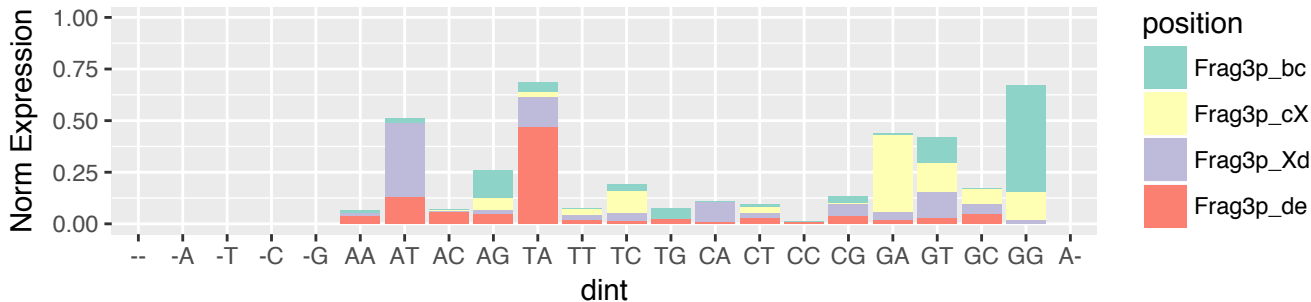

LUSC (n=1160)  
 5'-tRF & exclusive (n=180)  
 3' terminus relative to 5' stem of A-loop (n=7)

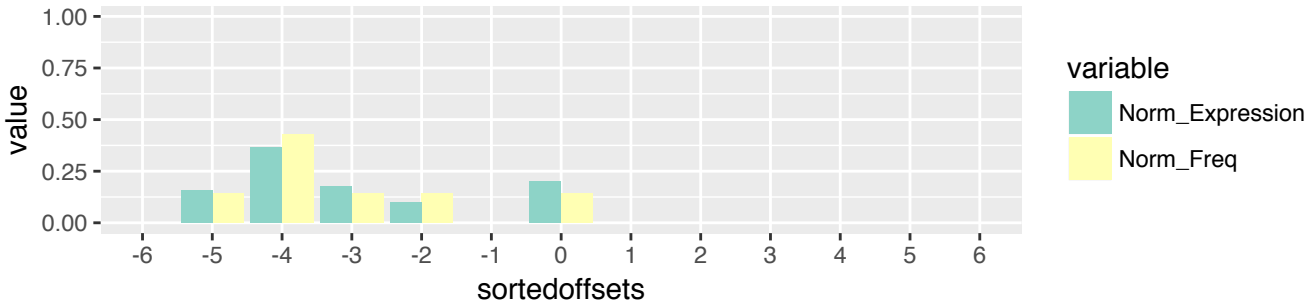

LUSC (n=1160)  
 5'-tRF & exclusive (n=180)  
 3' terminus relative to 5' stem of A-loop (n=7)

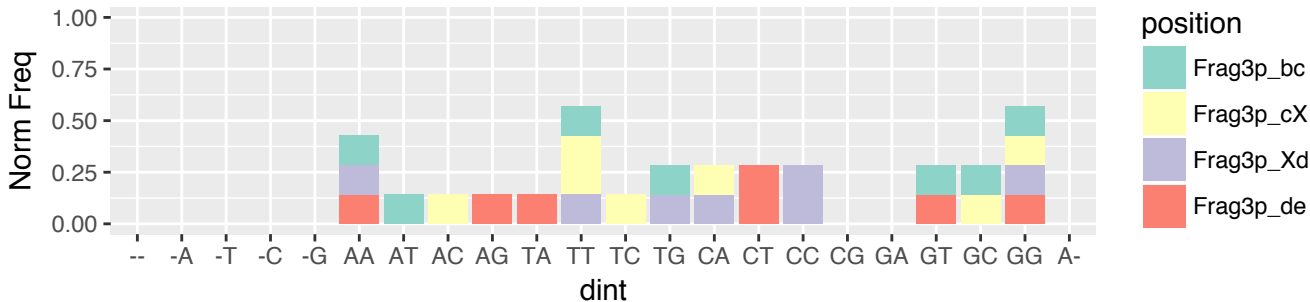

LUSC (n=1160)  
 5'-tRF & exclusive (n=180)  
 3' terminus relative to 5' stem of A-loop (n=7)

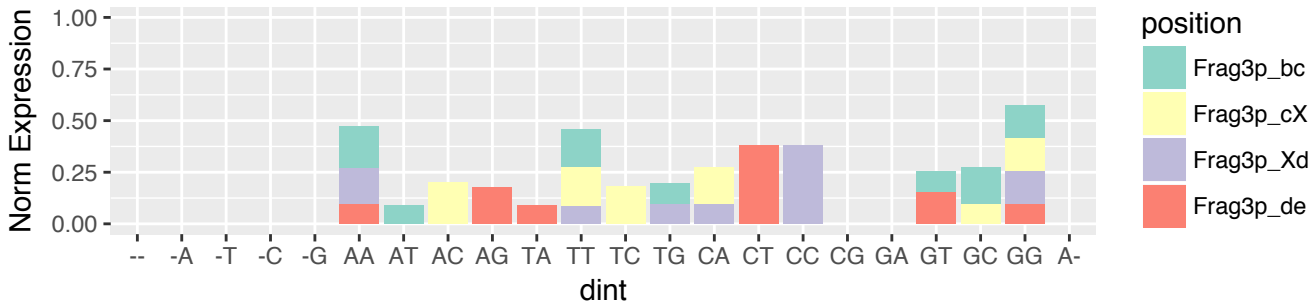

LUSC (n=1160)  
5'-tRF & exclusive (n=180)  
3' terminus relative to 3' stem of A-loop (n=3)

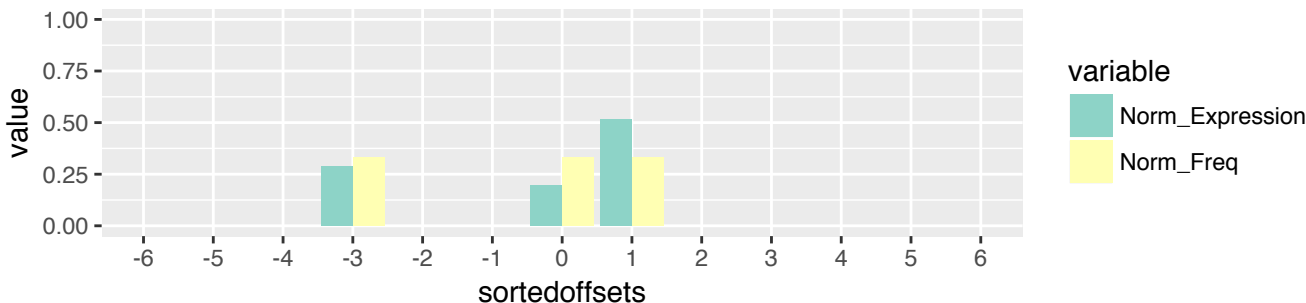

LUSC (n=1160)  
5'-tRF & exclusive (n=180)  
3' terminus relative to 3' stem of A-loop (n=3)

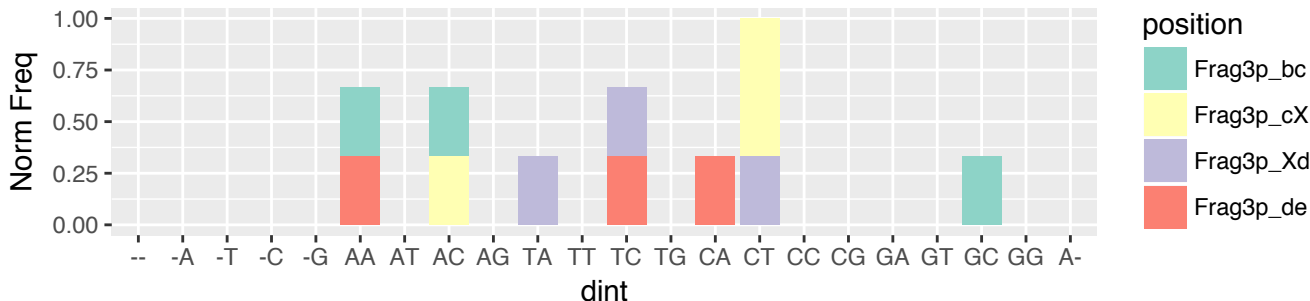

LUSC (n=1160)  
5'-tRF & exclusive (n=180)  
3' terminus relative to 3' stem of A-loop (n=3)

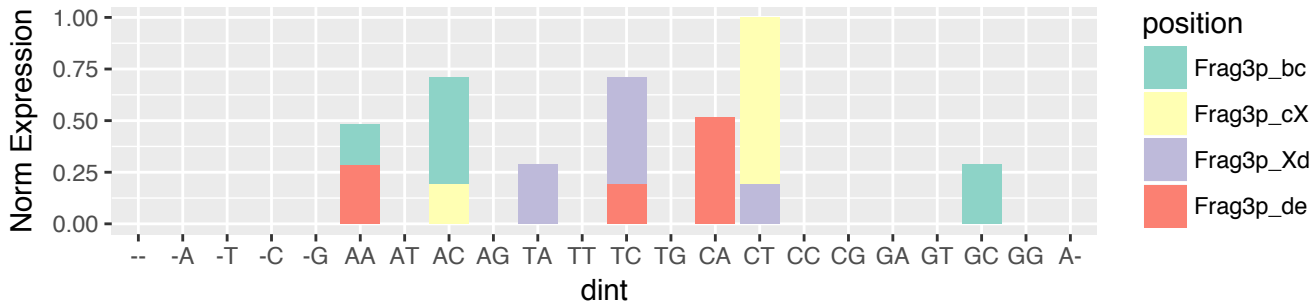

LUSC (n=1160)  
i-tRF & exclusive (n=243)  
5' terminus relative to 5' end of the tRNA (n=7)

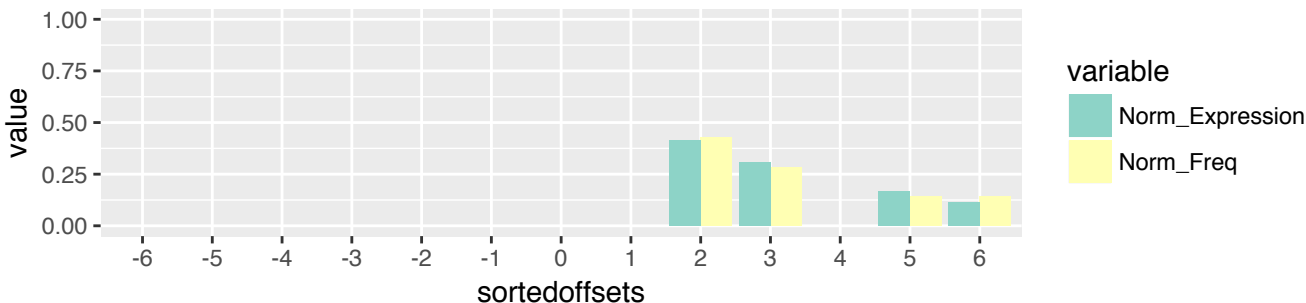

LUSC (n=1160)  
i-tRF & exclusive (n=243)  
5' terminus relative to 5' end of the tRNA (n=7)

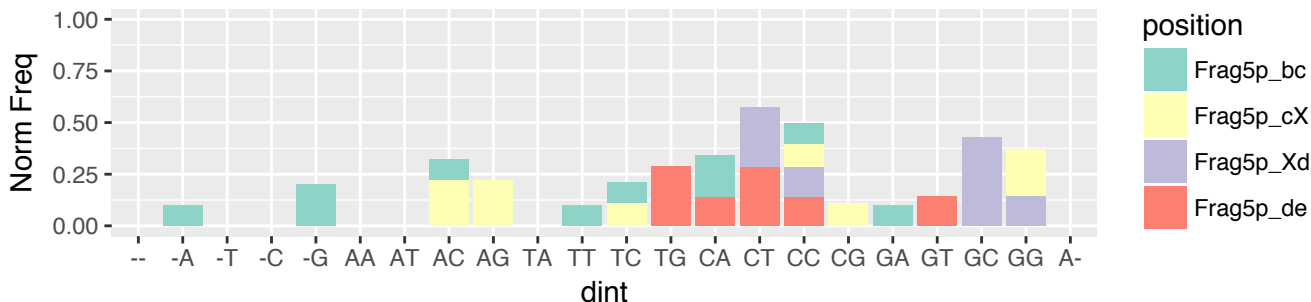

LUSC (n=1160)  
i-tRF & exclusive (n=243)  
5' terminus relative to 5' end of the tRNA (n=7)

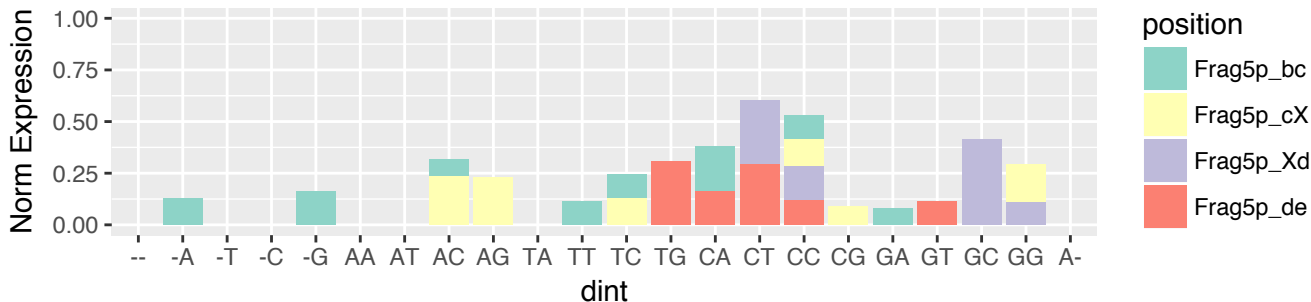

LUSC (n=1160)  
 i-tRF & exclusive (n=243)  
 5' terminus relative to 5' stem of D-loop (n=85)

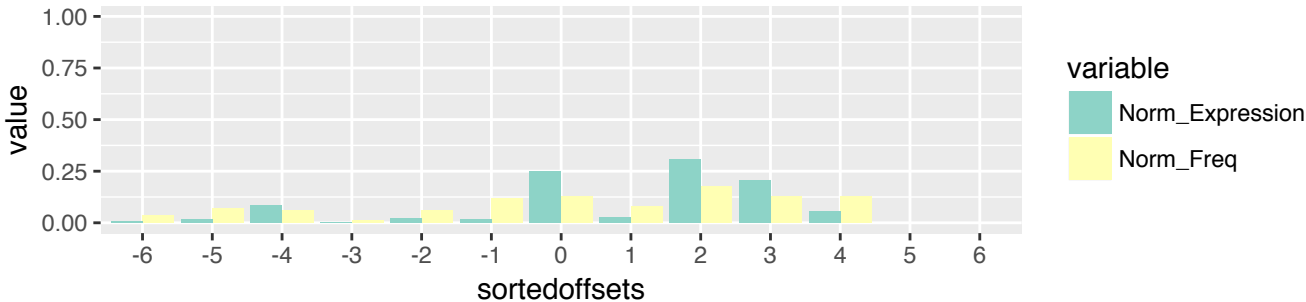

LUSC (n=1160)  
 i-tRF & exclusive (n=243)  
 5' terminus relative to 5' stem of D-loop (n=85)

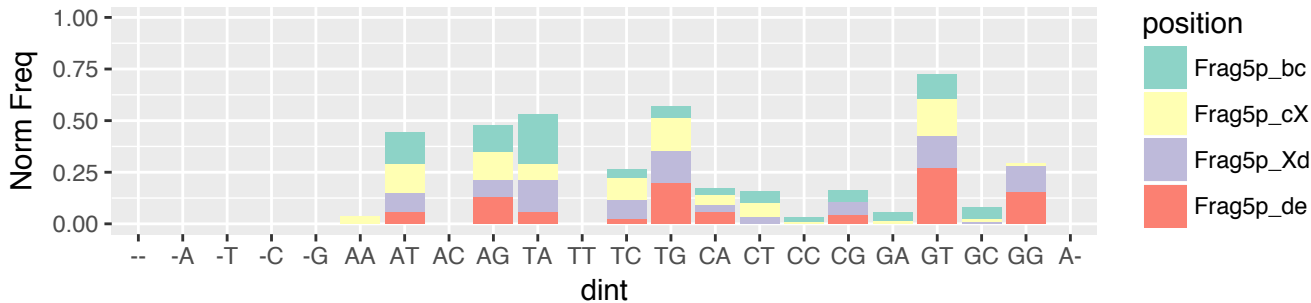

LUSC (n=1160)  
 i-tRF & exclusive (n=243)  
 5' terminus relative to 5' stem of D-loop (n=85)

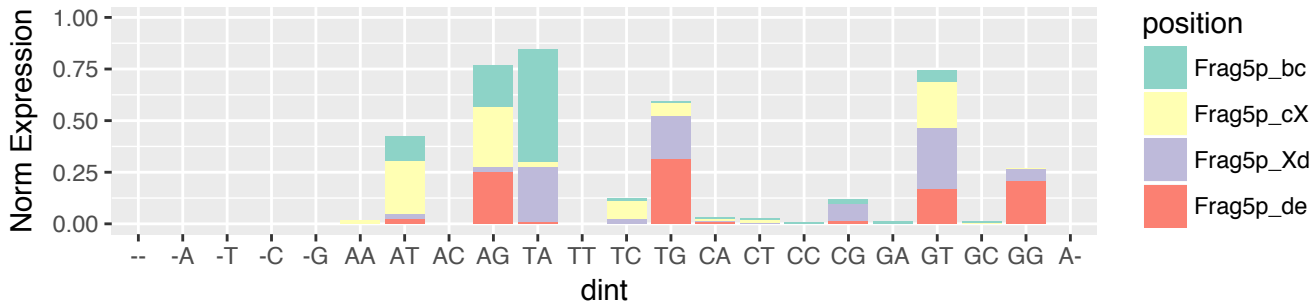

LUSC (n=1160)  
i-tRF & exclusive (n=243)  
5' terminus relative to 3' stem of D-loop (n=9)

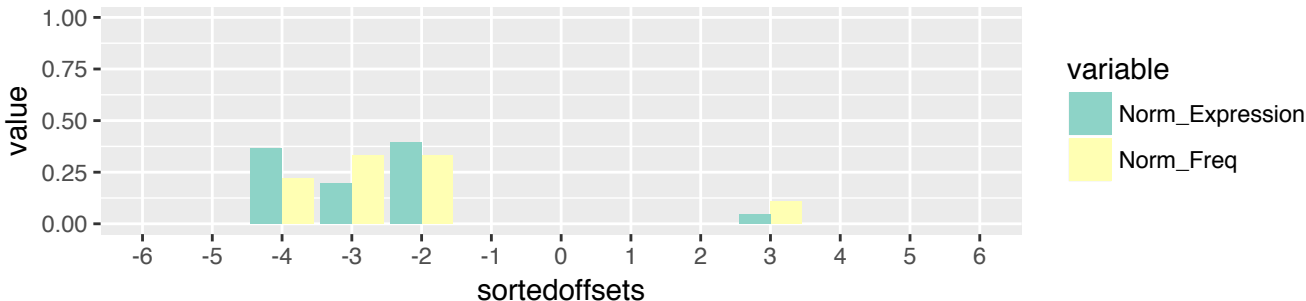

LUSC (n=1160)  
i-tRF & exclusive (n=243)  
5' terminus relative to 3' stem of D-loop (n=9)

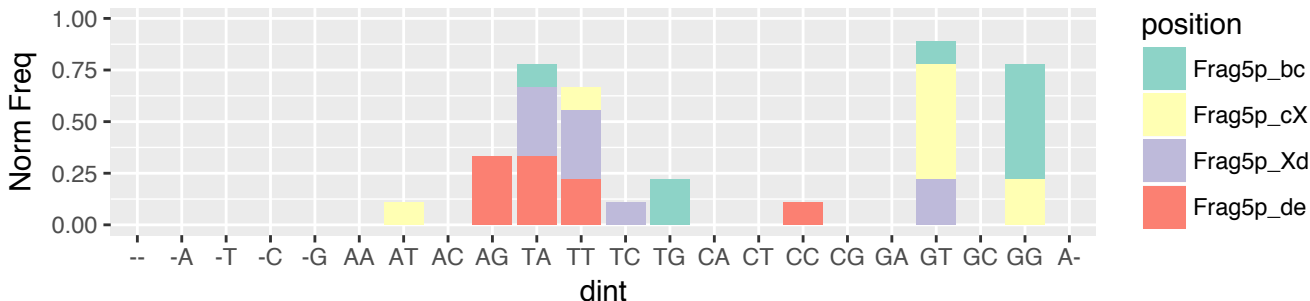

LUSC (n=1160)  
i-tRF & exclusive (n=243)  
5' terminus relative to 3' stem of D-loop (n=9)

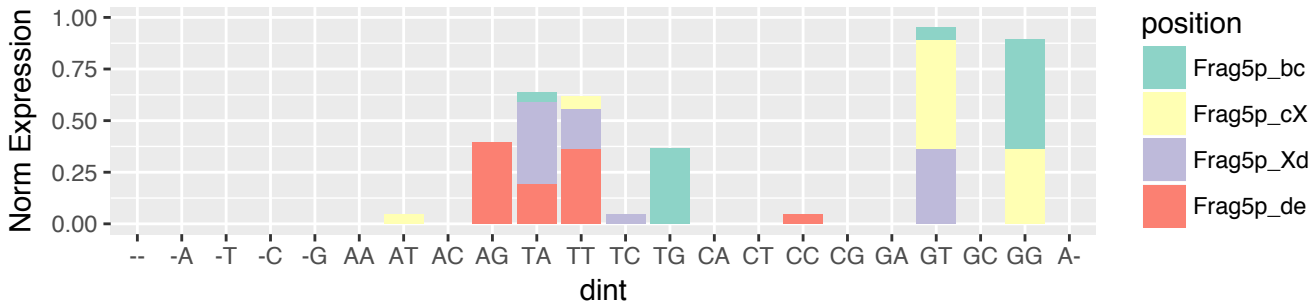

LUSC (n=1160)  
i-tRF & exclusive (n=243)  
5' terminus relative to 5' stem of A-loop (n=50)

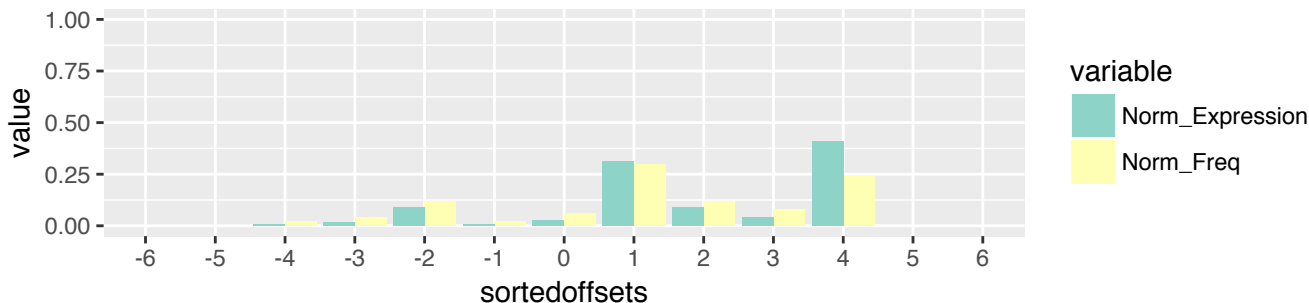

LUSC (n=1160)  
i-tRF & exclusive (n=243)  
5' terminus relative to 5' stem of A-loop (n=50)

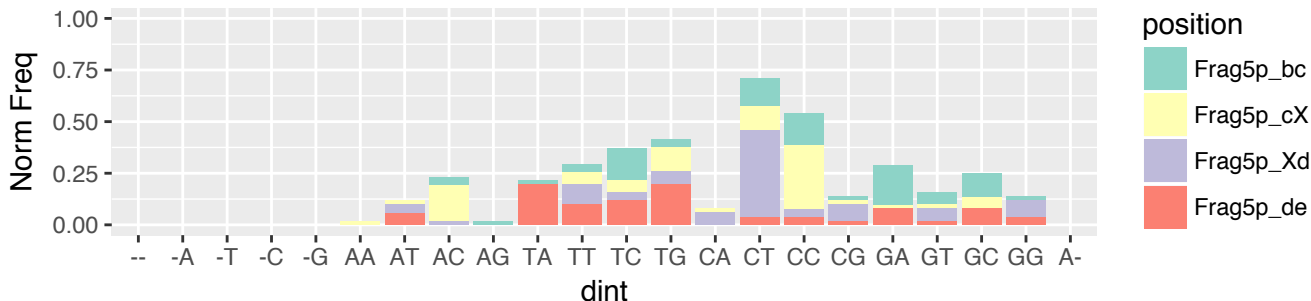

LUSC (n=1160)  
i-tRF & exclusive (n=243)  
5' terminus relative to 5' stem of A-loop (n=50)

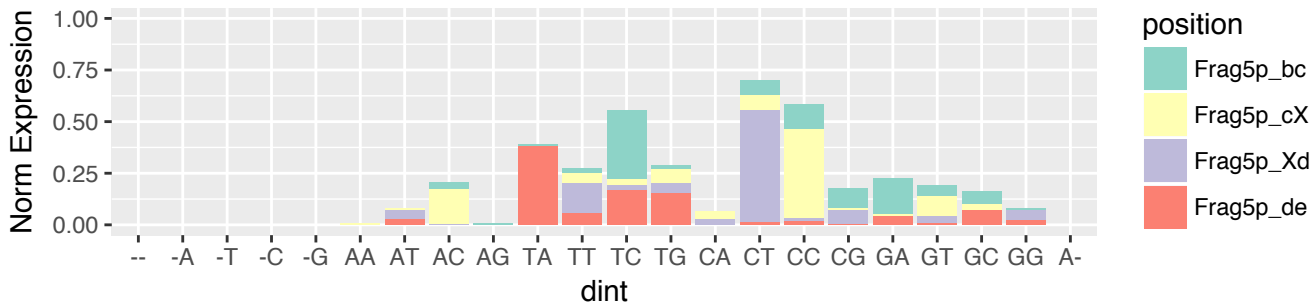



LUSC (n=1160)  
 i-tRF & exclusive (n=243)  
 5' terminus relative to 3' stem of A-loop (n=70)

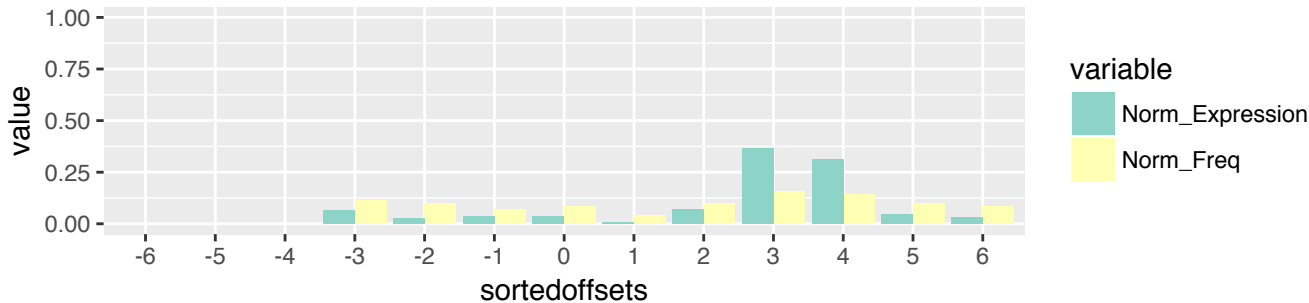

LUSC (n=1160)  
 i-tRF & exclusive (n=243)  
 5' terminus relative to 3' stem of A-loop (n=70)

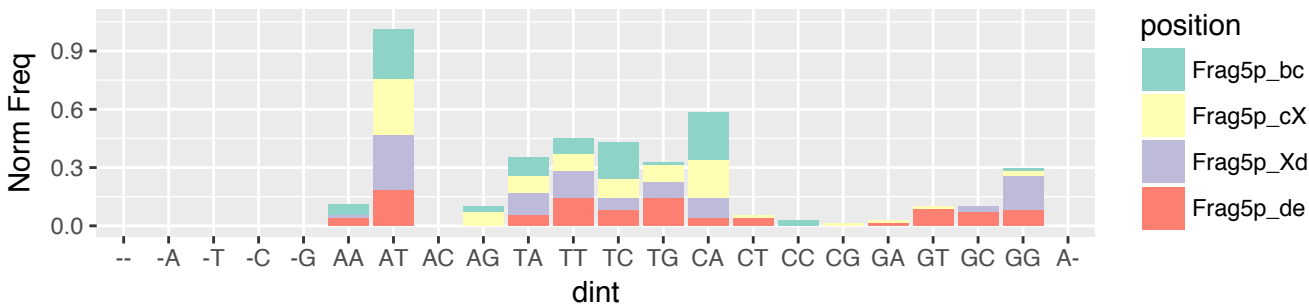

LUSC (n=1160)  
 i-tRF & exclusive (n=243)  
 5' terminus relative to 3' stem of A-loop (n=70)

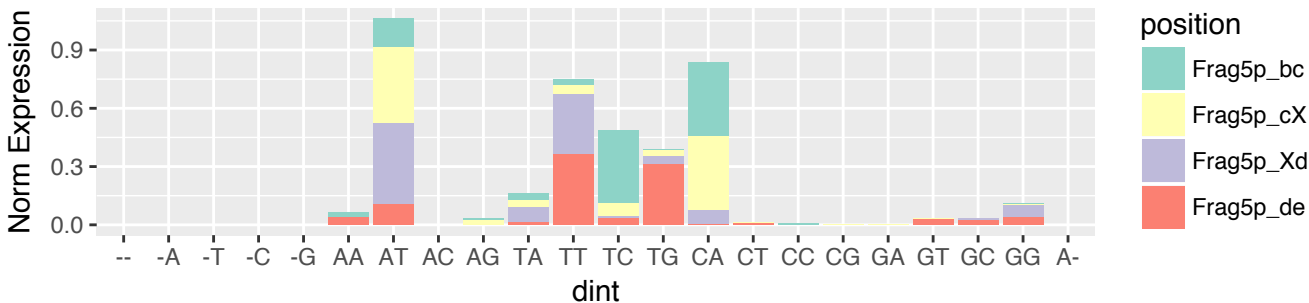

LUSC (n=1160)  
i-tRF & exclusive (n=243)  
5' terminus relative to 5' stem of T-loop (n=22)

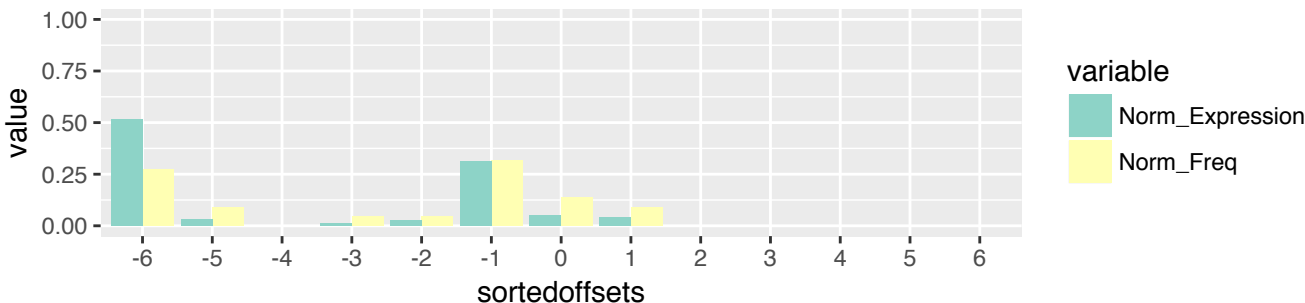

LUSC (n=1160)  
i-tRF & exclusive (n=243)  
5' terminus relative to 5' stem of T-loop (n=22)

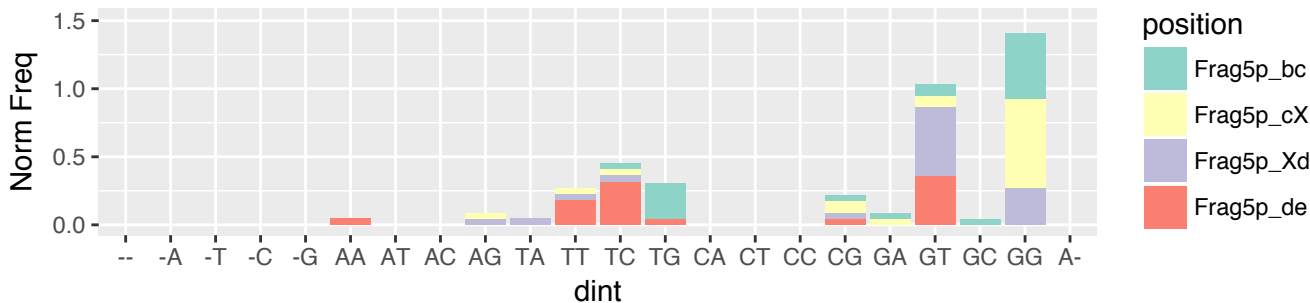

LUSC (n=1160)  
i-tRF & exclusive (n=243)  
5' terminus relative to 5' stem of T-loop (n=22)

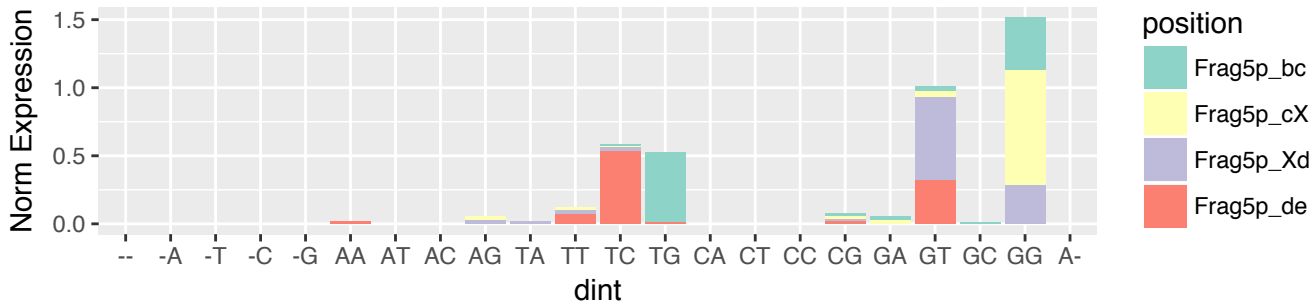

LUSC (n=1160)  
 i-tRF & exclusive (n=243)  
 3' terminus relative to 3' stem of D-loop (n=4)

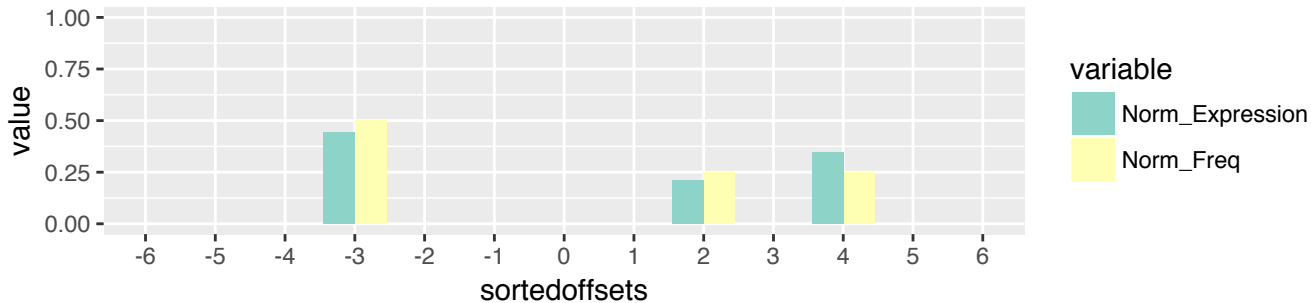

LUSC (n=1160)  
 i-tRF & exclusive (n=243)  
 3' terminus relative to 3' stem of D-loop (n=4)

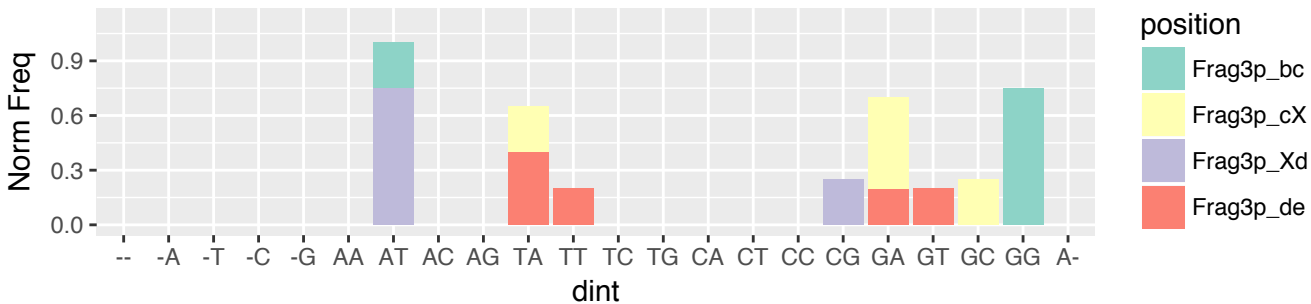

LUSC (n=1160)  
 i-tRF & exclusive (n=243)  
 3' terminus relative to 3' stem of D-loop (n=4)

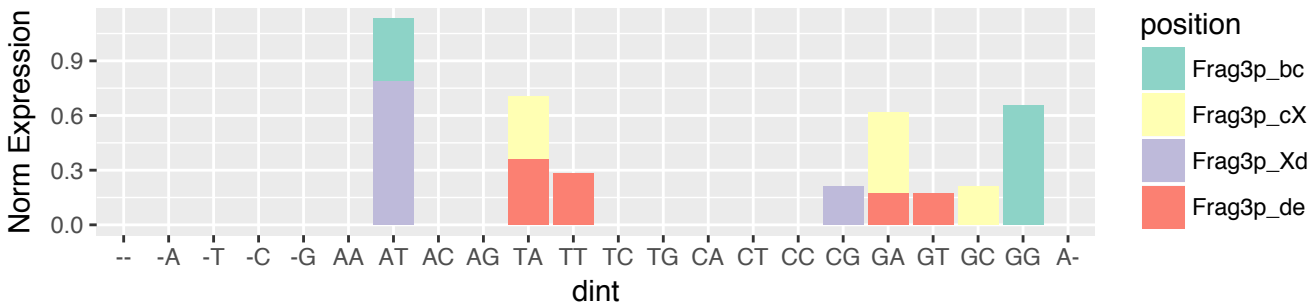

LUSC (n=1160)  
i-tRF & exclusive (n=243)  
3' terminus relative to 5' stem of A-loop (n=72)

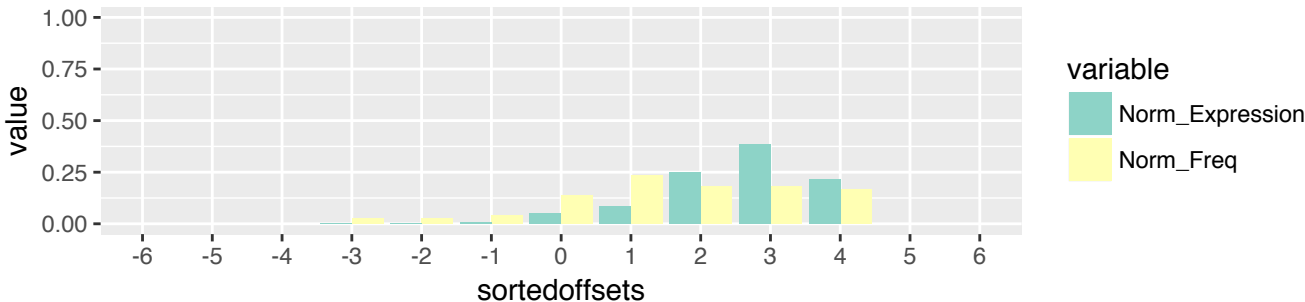

LUSC (n=1160)  
i-tRF & exclusive (n=243)  
3' terminus relative to 5' stem of A-loop (n=72)

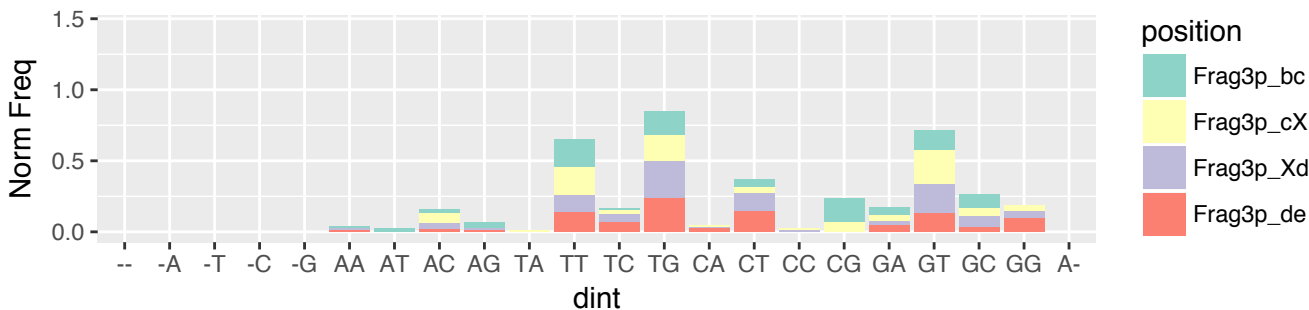

LUSC (n=1160)  
i-tRF & exclusive (n=243)  
3' terminus relative to 5' stem of A-loop (n=72)

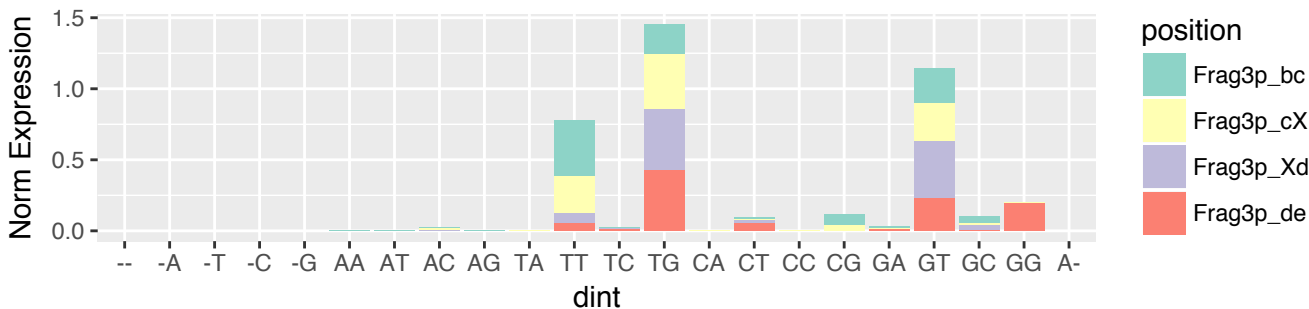

LUSC (n=1160)  
 i-tRF & exclusive (n=243)  
 3' terminus relative to 3' stem of A-loop (n=29)

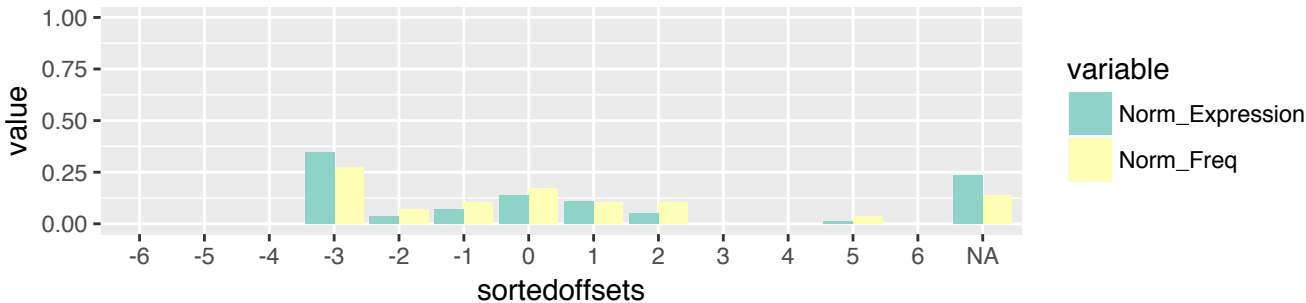

LUSC (n=1160)  
 i-tRF & exclusive (n=243)  
 3' terminus relative to 3' stem of A-loop (n=29)

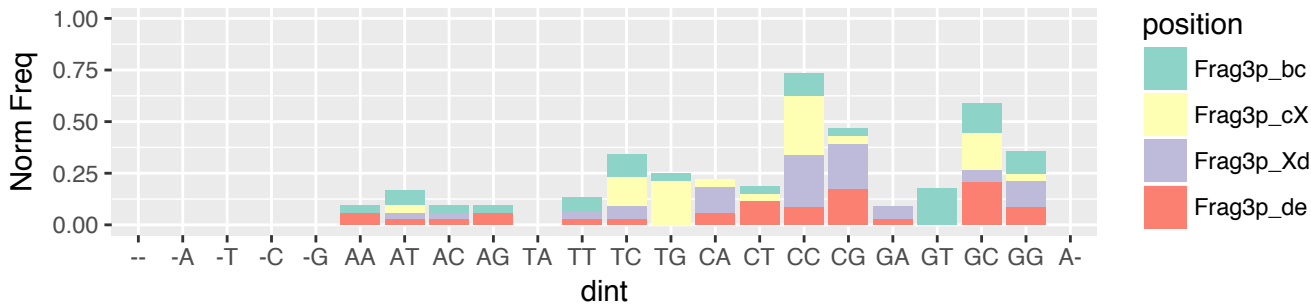

LUSC (n=1160)  
 i-tRF & exclusive (n=243)  
 3' terminus relative to 3' stem of A-loop (n=29)

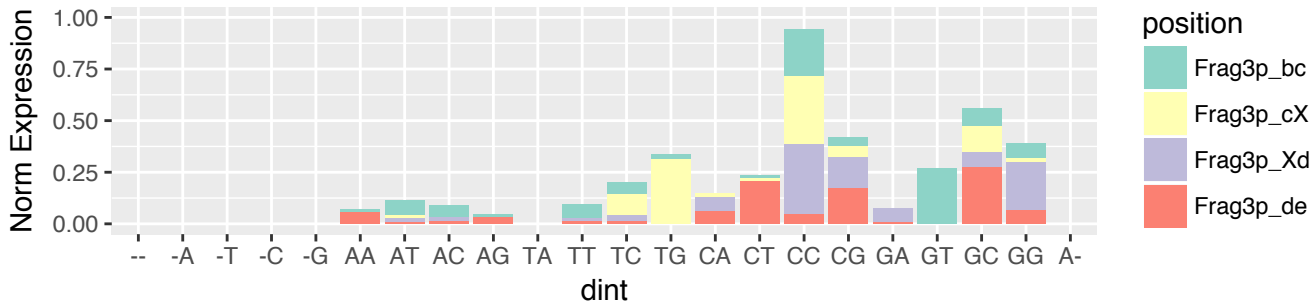

LUSC (n=1160)  
i-tRF & exclusive (n=243)  
3' terminus relative to 5' stem of T-loop (n=57)

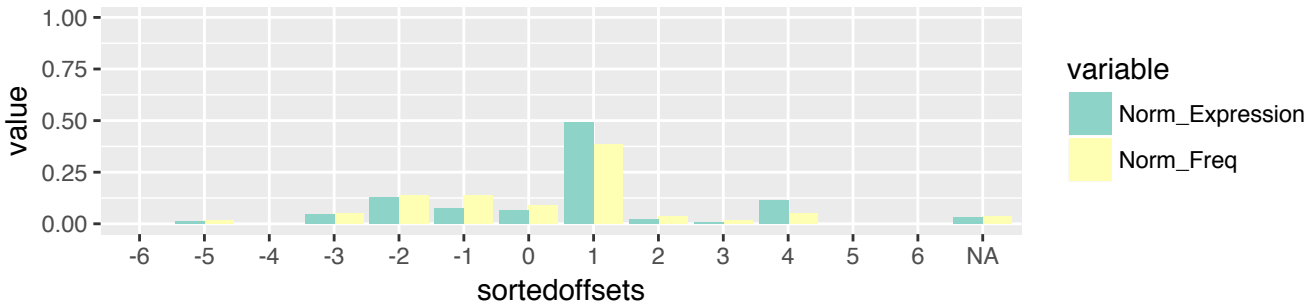

LUSC (n=1160)  
i-tRF & exclusive (n=243)  
3' terminus relative to 5' stem of T-loop (n=57)

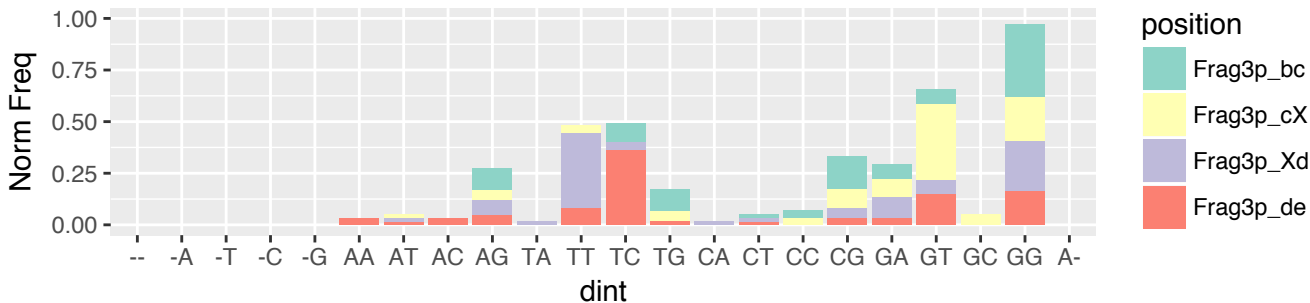

LUSC (n=1160)  
i-tRF & exclusive (n=243)  
3' terminus relative to 5' stem of T-loop (n=57)

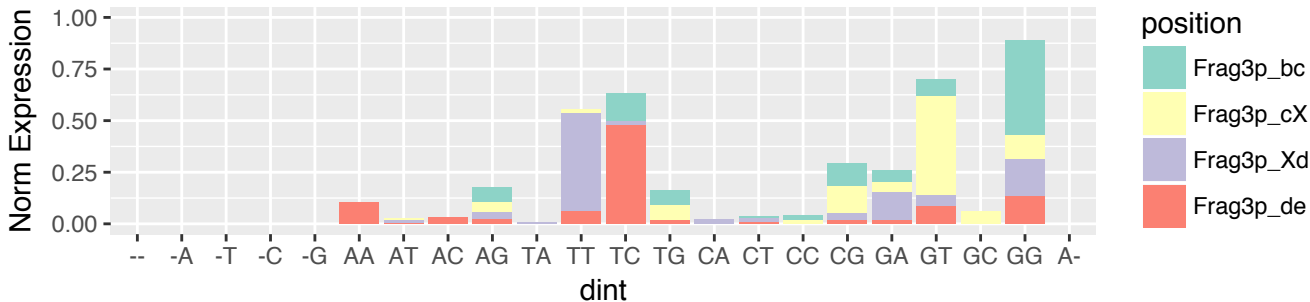

LUSC (n=1160)  
i-tRF & exclusive (n=243)  
3' terminus relative to 3' stem of T-loop (n=55)

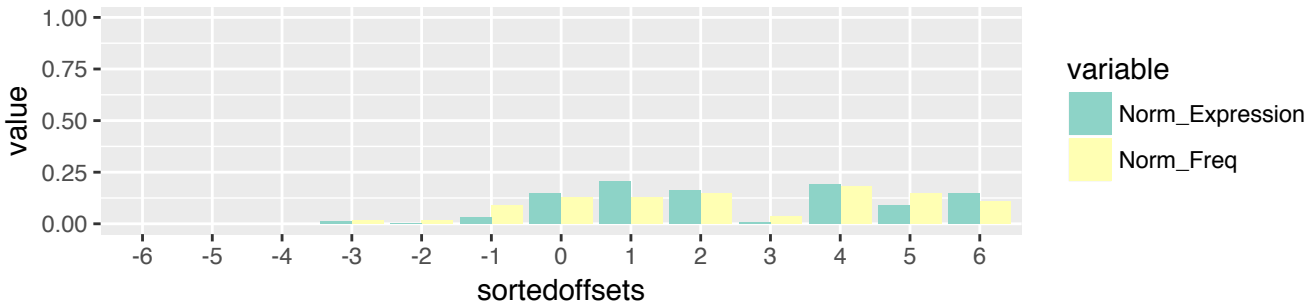

LUSC (n=1160)  
i-tRF & exclusive (n=243)  
3' terminus relative to 3' stem of T-loop (n=55)

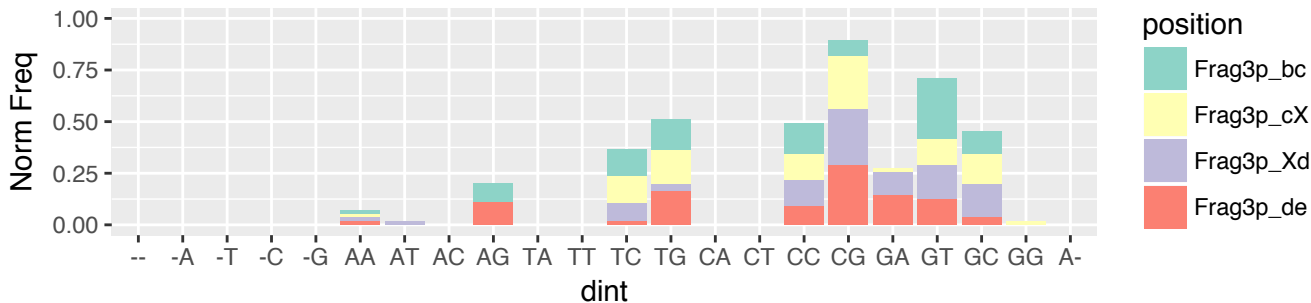

LUSC (n=1160)  
i-tRF & exclusive (n=243)  
3' terminus relative to 3' stem of T-loop (n=55)

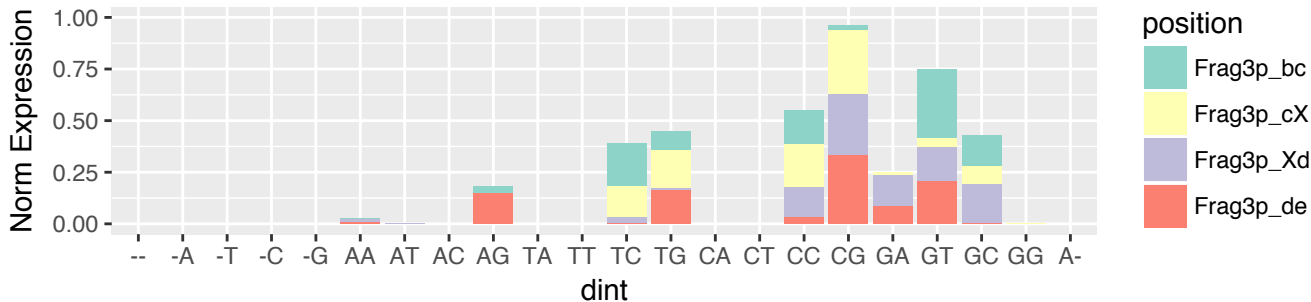

LUSC (n=1160)  
i-tRF & exclusive (n=243)  
3' terminus relative to 3' end of the tRNA (n=27)

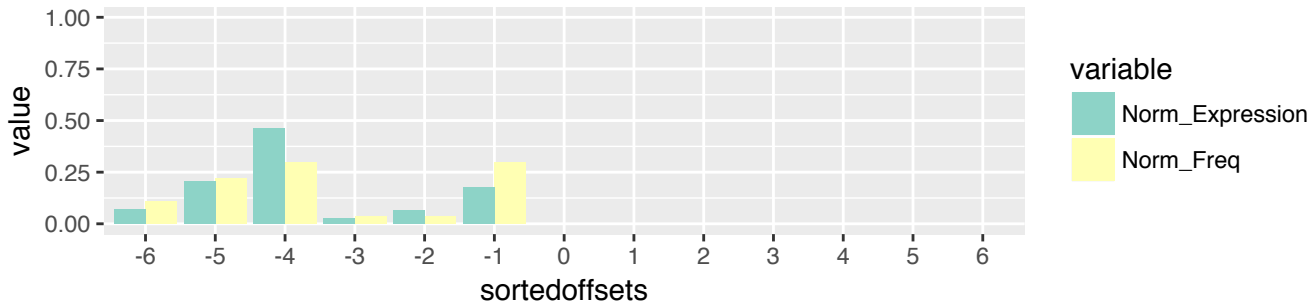

LUSC (n=1160)  
i-tRF & exclusive (n=243)  
3' terminus relative to 3' end of the tRNA (n=27)

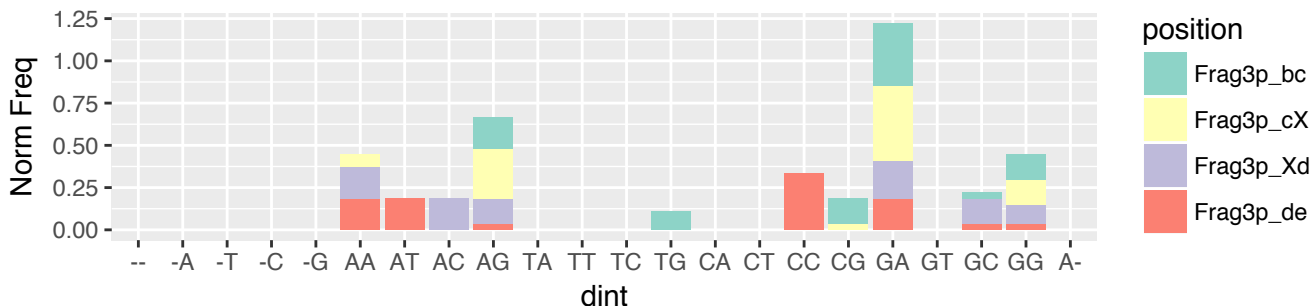

LUSC (n=1160)  
i-tRF & exclusive (n=243)  
3' terminus relative to 3' end of the tRNA (n=27)

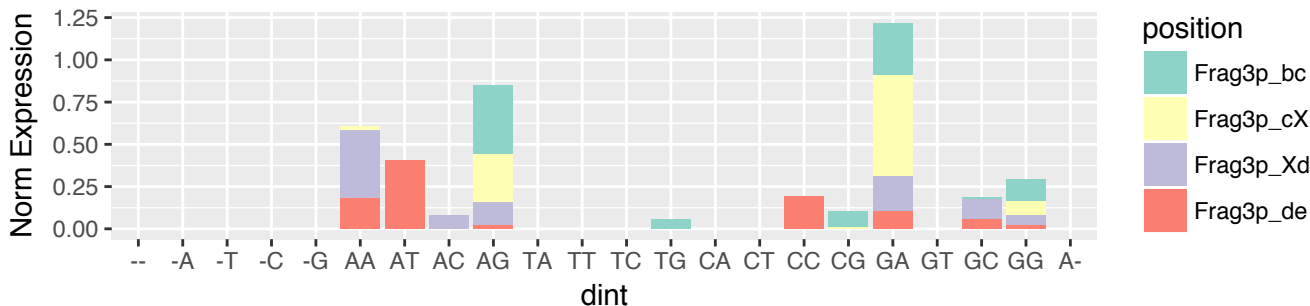



LUSC (n=1160)  
 3'-tRF & exclusive (n=186)  
 5' terminus relative to 5' stem of T-loop (n=117)

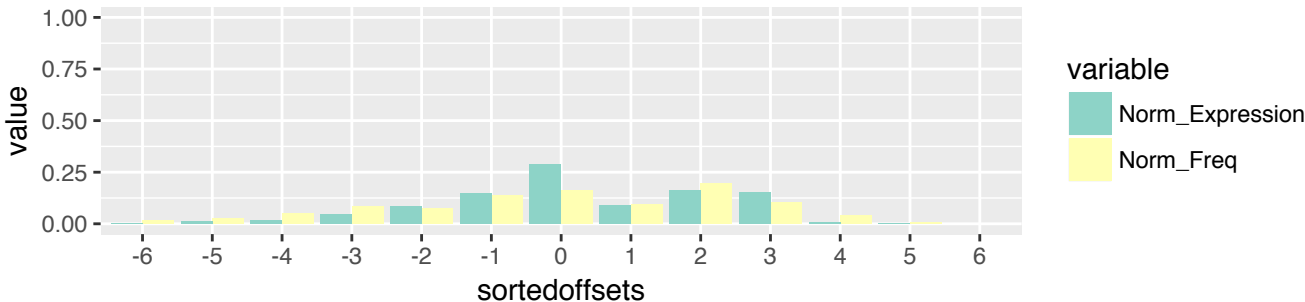

LUSC (n=1160)  
 3'-tRF & exclusive (n=186)  
 5' terminus relative to 5' stem of T-loop (n=117)

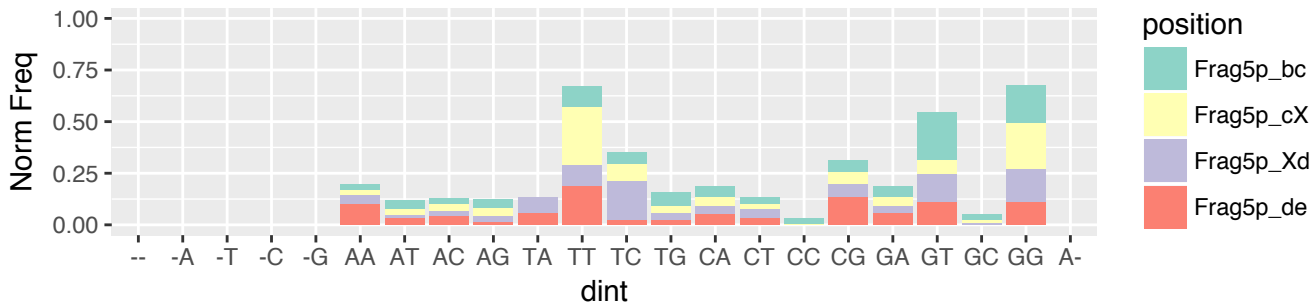

LUSC (n=1160)  
 3'-tRF & exclusive (n=186)  
 5' terminus relative to 5' stem of T-loop (n=117)

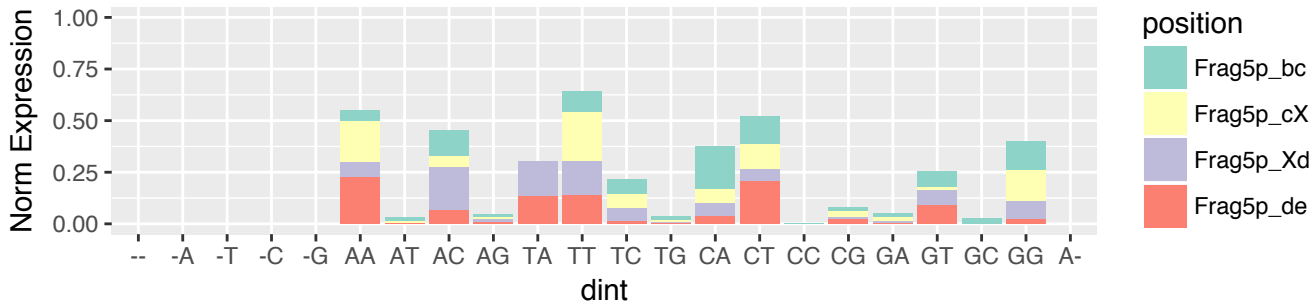

LUSC (n=1160)  
 3'-tRF & exclusive (n=186)  
 5' terminus relative to 3' stem of T-loop (n=69)

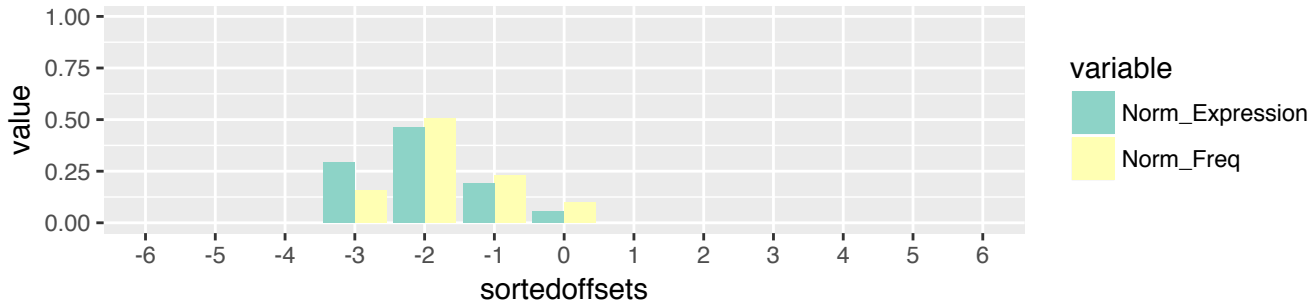

LUSC (n=1160)  
 3'-tRF & exclusive (n=186)  
 5' terminus relative to 3' stem of T-loop (n=69)

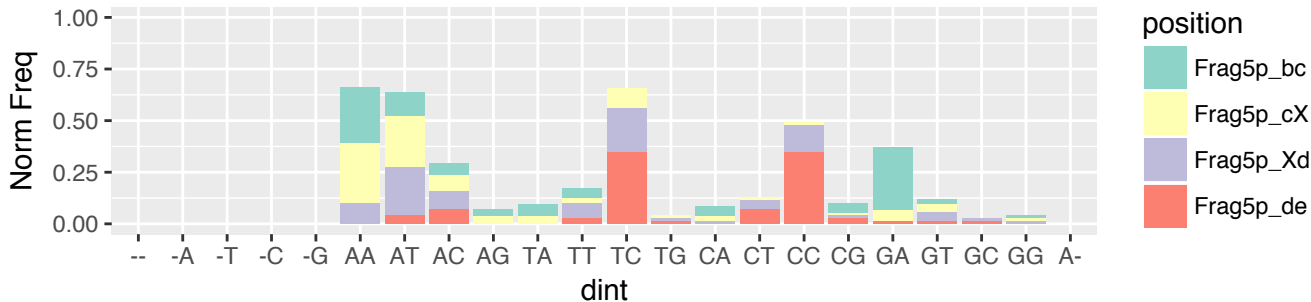

LUSC (n=1160)  
 3'-tRF & exclusive (n=186)  
 5' terminus relative to 3' stem of T-loop (n=69)

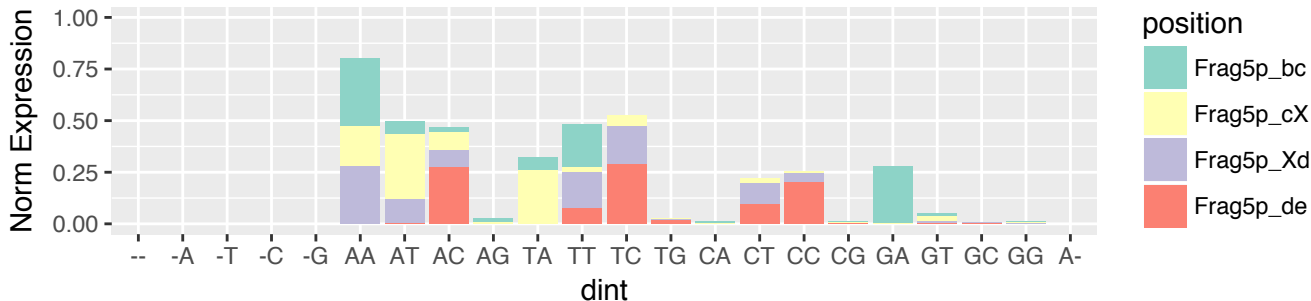

LUSC (n=1160)  
 3'-tRF & exclusive (n=186)  
 3' terminus relative to 3' end of the tRNA (n=186)

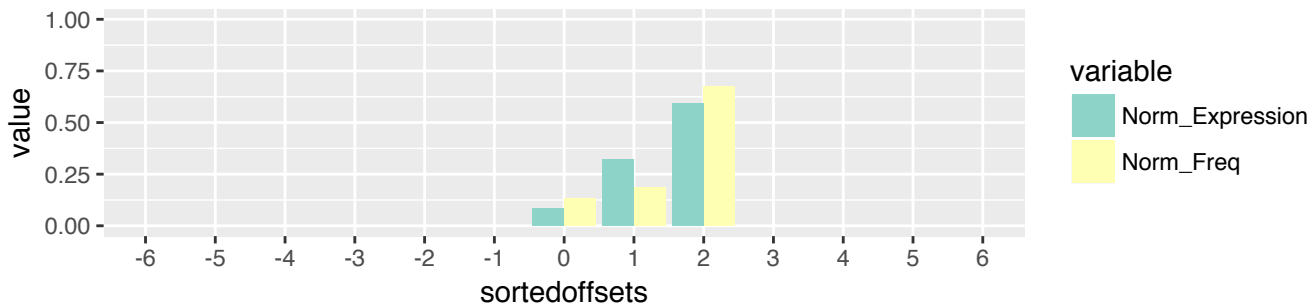

LUSC (n=1160)  
 3'-tRF & exclusive (n=186)  
 3' terminus relative to 3' end of the tRNA (n=186)

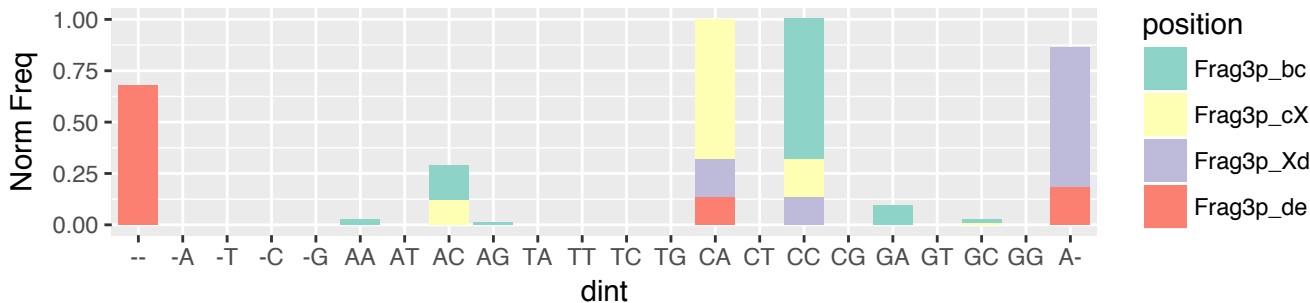

LUSC (n=1160)  
 3'-tRF & exclusive (n=186)  
 3' terminus relative to 3' end of the tRNA (n=186)

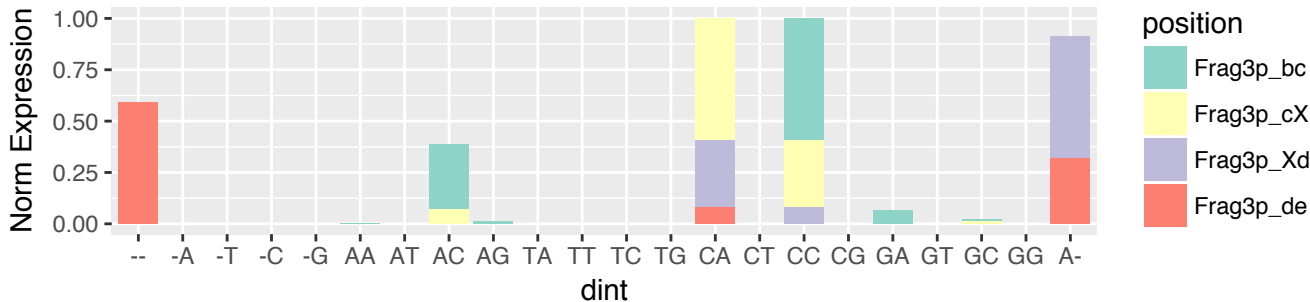

MESO (n=731)  
5'-half & exclusive (n=3)  
5' terminus relative to 5' end of the tRNA (n=3)

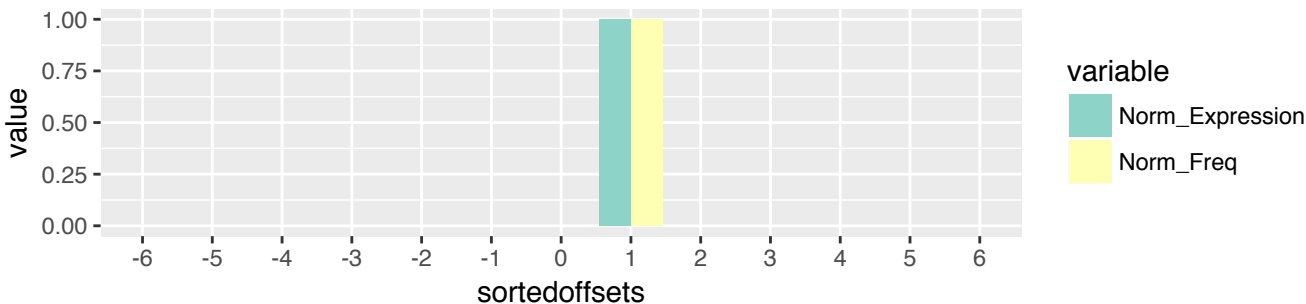

MESO (n=731)  
5'-half & exclusive (n=3)  
5' terminus relative to 5' end of the tRNA (n=3)

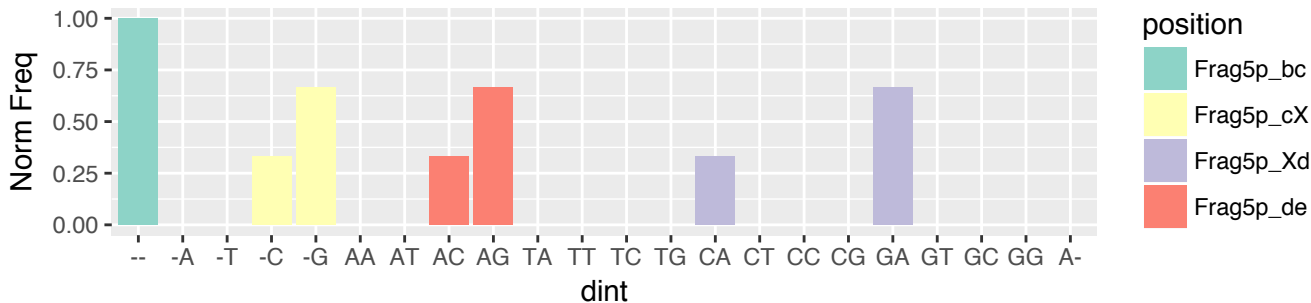

MESO (n=731)  
5'-half & exclusive (n=3)  
5' terminus relative to 5' end of the tRNA (n=3)

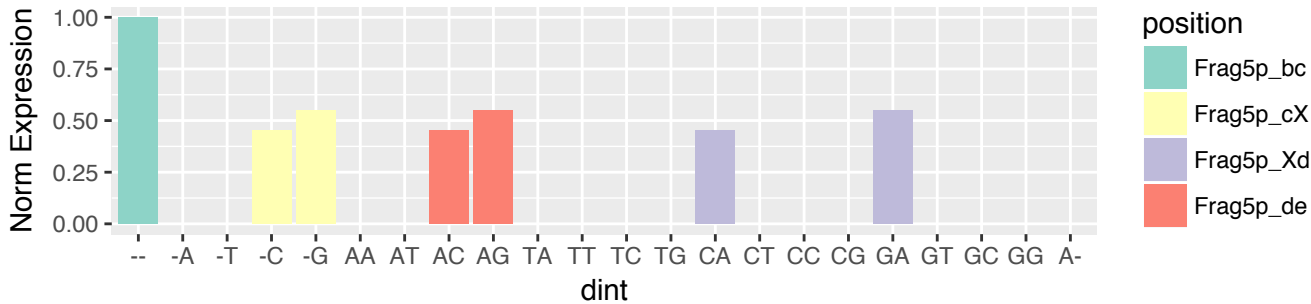

MESO (n=731)  
 5'-half & exclusive (n=3)  
 3' terminus relative to 5' stem of A-loop (n=3)

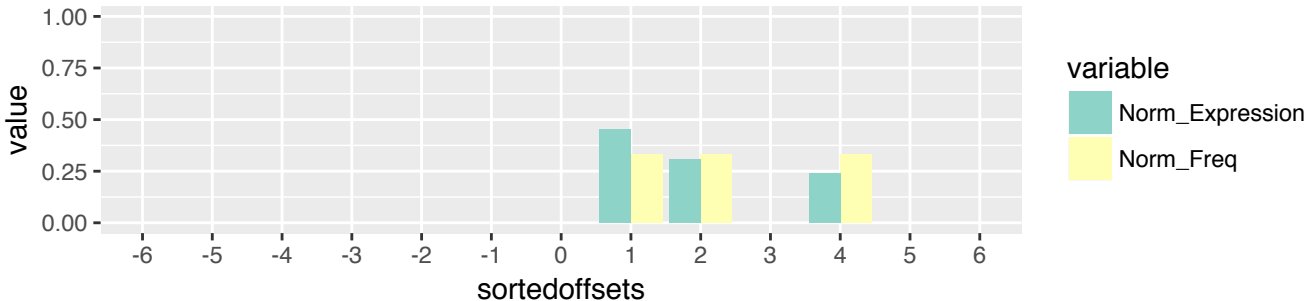

MESO (n=731)  
 5'-half & exclusive (n=3)  
 3' terminus relative to 5' stem of A-loop (n=3)

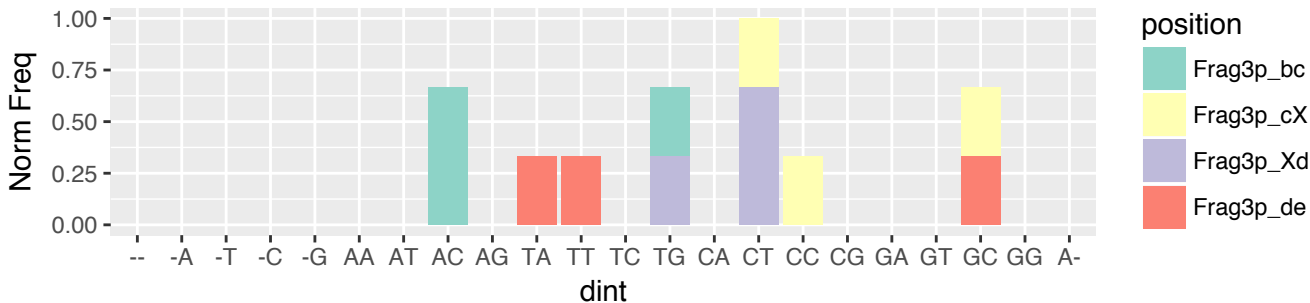

MESO (n=731)  
 5'-half & exclusive (n=3)  
 3' terminus relative to 5' stem of A-loop (n=3)

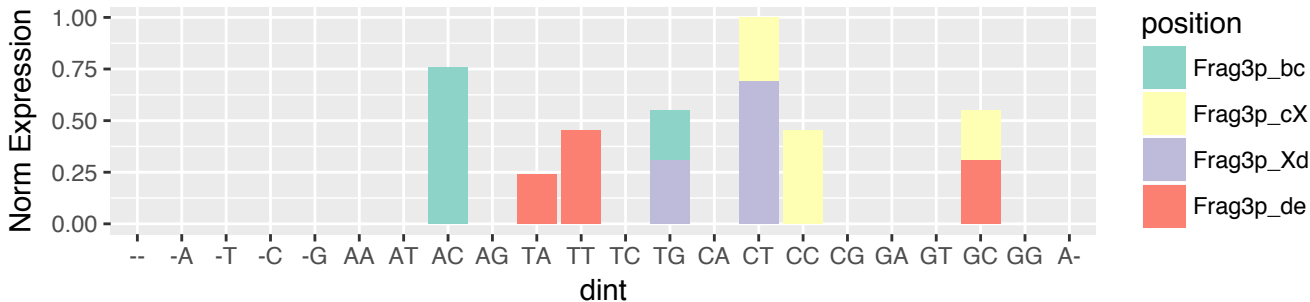

MESO (n=731)  
 5'-tRF & exclusive (n=133)  
 5' terminus relative to 5' end of the tRNA (n=133)

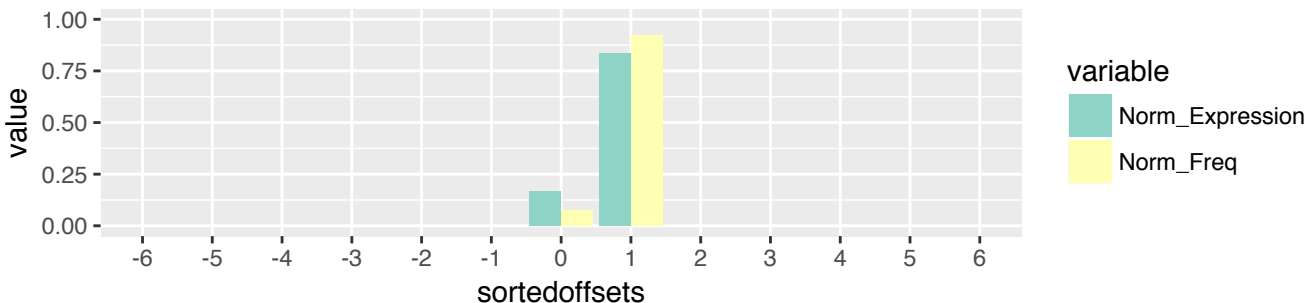

MESO (n=731)  
 5'-tRF & exclusive (n=133)  
 5' terminus relative to 5' end of the tRNA (n=133)

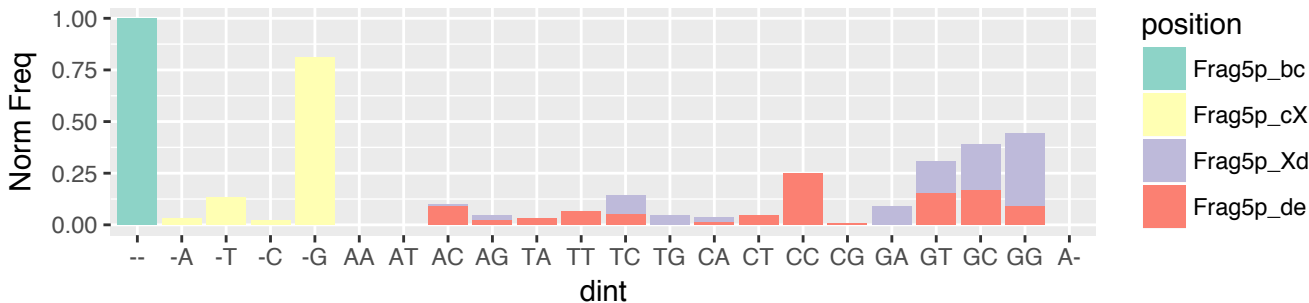

MESO (n=731)  
 5'-tRF & exclusive (n=133)  
 5' terminus relative to 5' end of the tRNA (n=133)

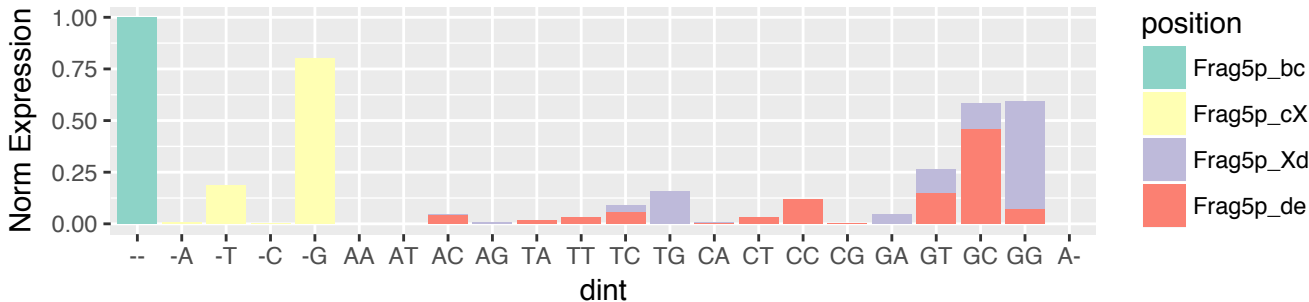

MESO (n=731)  
 5'-tRF & exclusive (n=133)  
 3' terminus relative to 5' stem of D-loop (n=2)

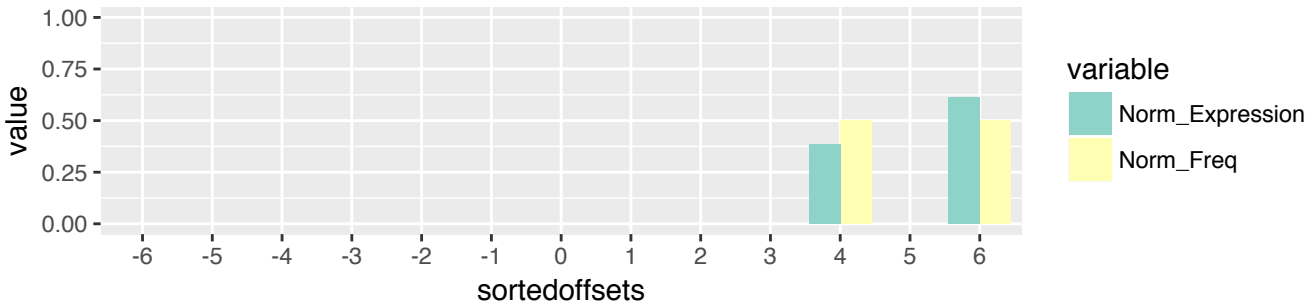

MESO (n=731)  
 5'-tRF & exclusive (n=133)  
 3' terminus relative to 5' stem of D-loop (n=2)

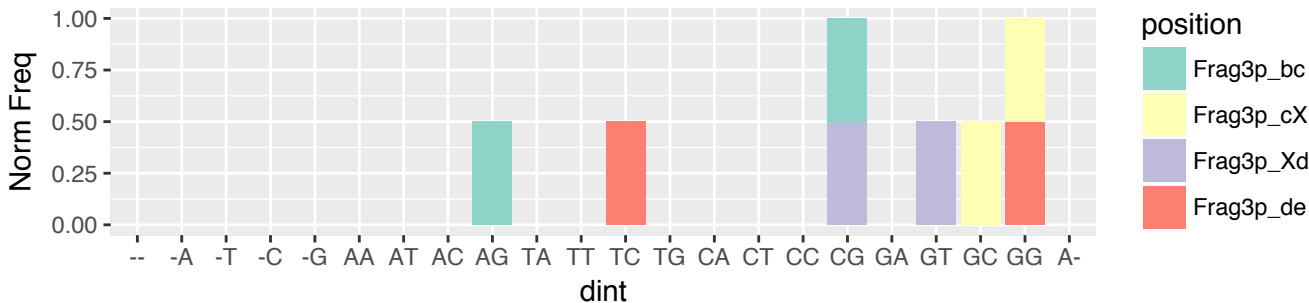

MESO (n=731)  
 5'-tRF & exclusive (n=133)  
 3' terminus relative to 5' stem of D-loop (n=2)

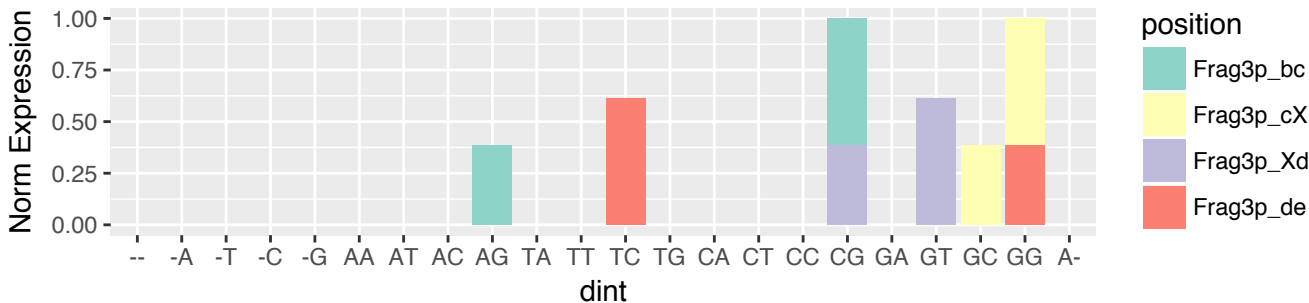

MESO (n=731)  
 5'-tRF & exclusive (n=133)  
 3' terminus relative to 3' stem of D-loop (n=120)

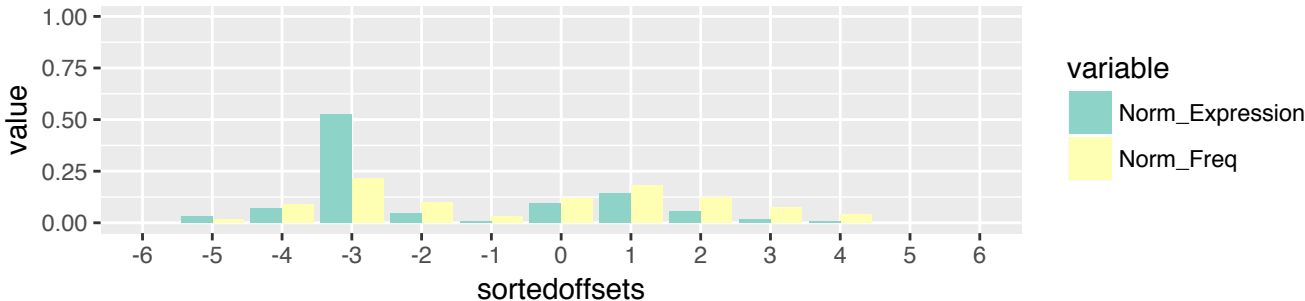

MESO (n=731)  
 5'-tRF & exclusive (n=133)  
 3' terminus relative to 3' stem of D-loop (n=120)

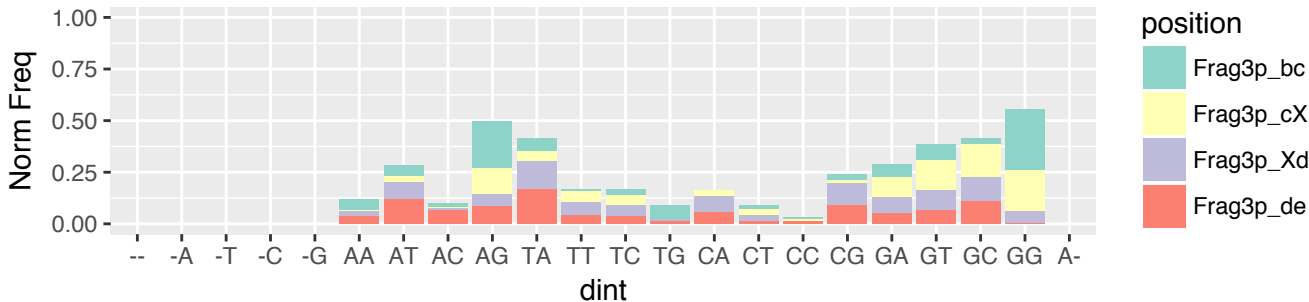

MESO (n=731)  
 5'-tRF & exclusive (n=133)  
 3' terminus relative to 3' stem of D-loop (n=120)

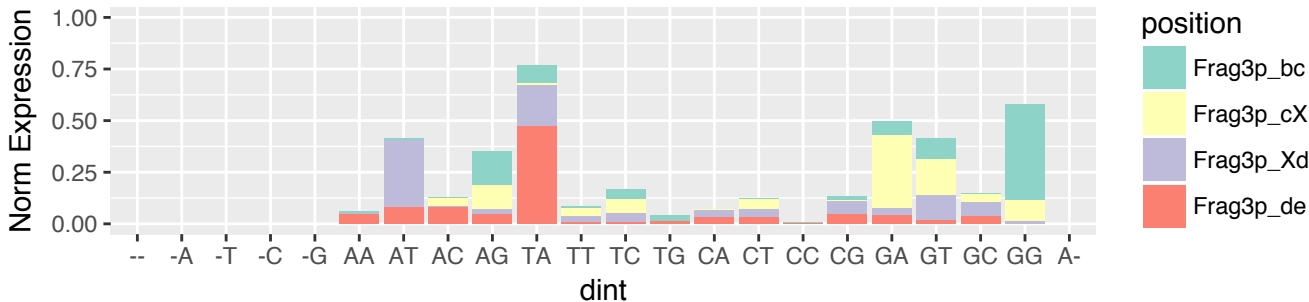



MESO (n=731)  
 5'-tRF & exclusive (n=133)  
 3' terminus relative to 5' stem of A-loop (n=8)

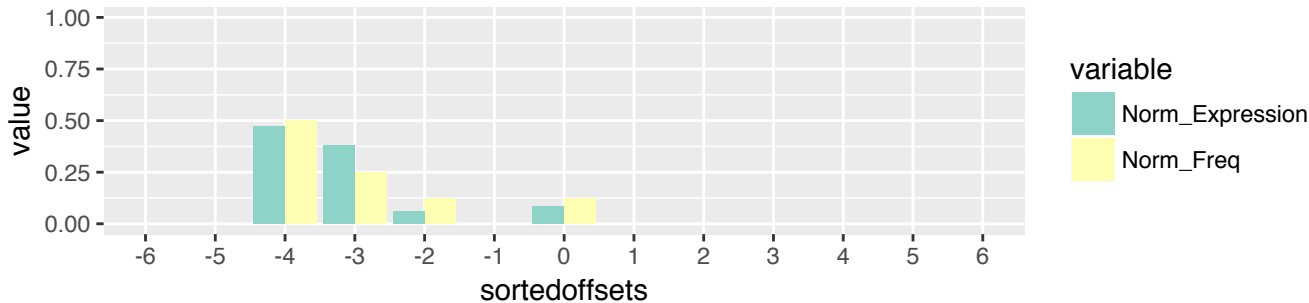

MESO (n=731)  
 5'-tRF & exclusive (n=133)  
 3' terminus relative to 5' stem of A-loop (n=8)

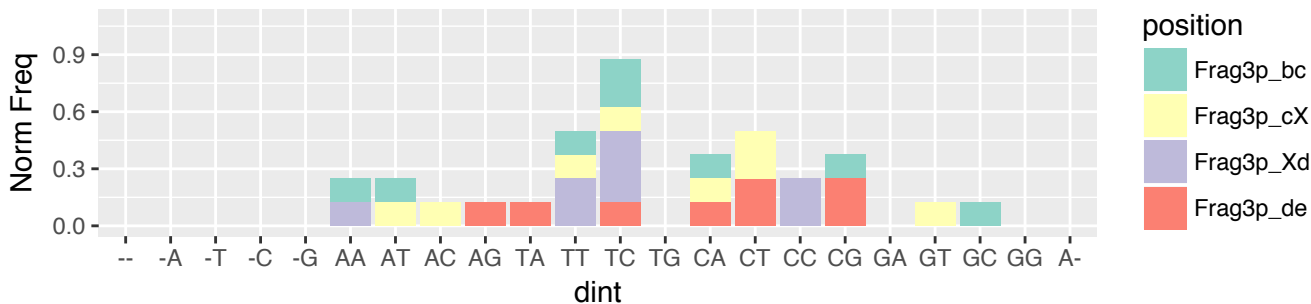

MESO (n=731)  
 5'-tRF & exclusive (n=133)  
 3' terminus relative to 5' stem of A-loop (n=8)

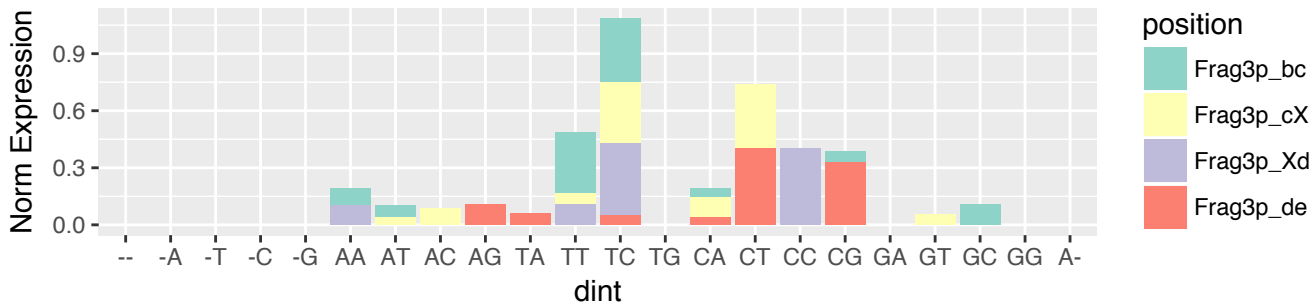

MESO (n=731)  
 5'-tRF & exclusive (n=133)  
 3' terminus relative to 3' stem of A-loop (n=3)

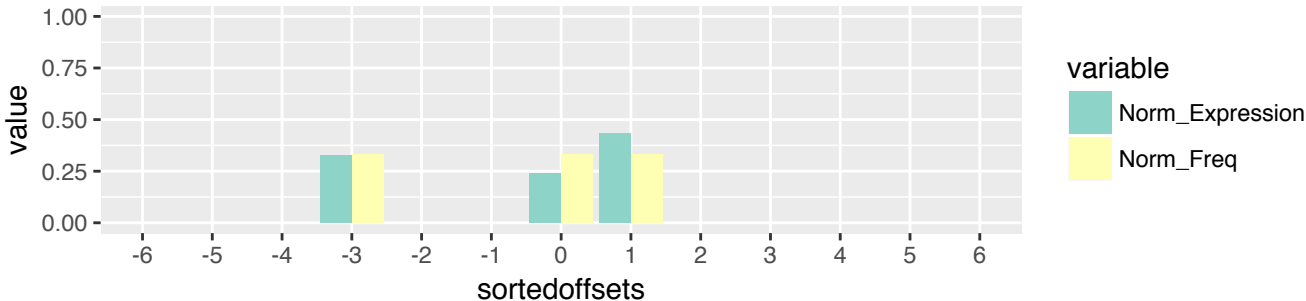

MESO (n=731)  
 5'-tRF & exclusive (n=133)  
 3' terminus relative to 3' stem of A-loop (n=3)

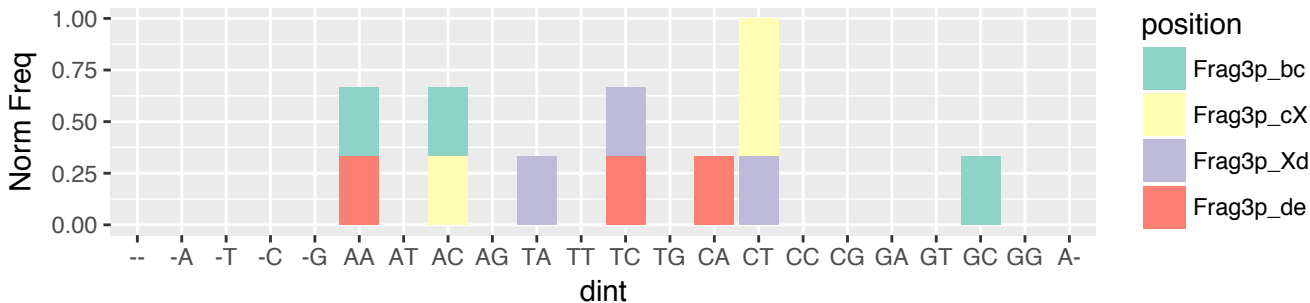

MESO (n=731)  
 5'-tRF & exclusive (n=133)  
 3' terminus relative to 3' stem of A-loop (n=3)

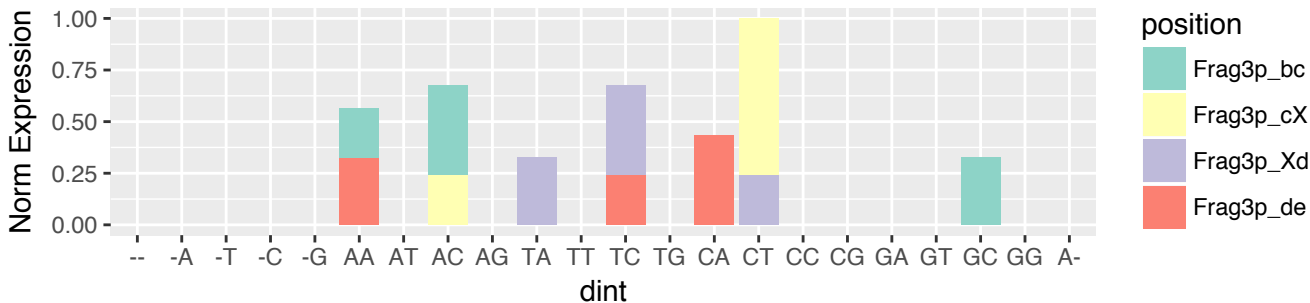

MESO (n=731)  
i-tRF & exclusive (n=150)  
5' terminus relative to 5' end of the tRNA (n=2)

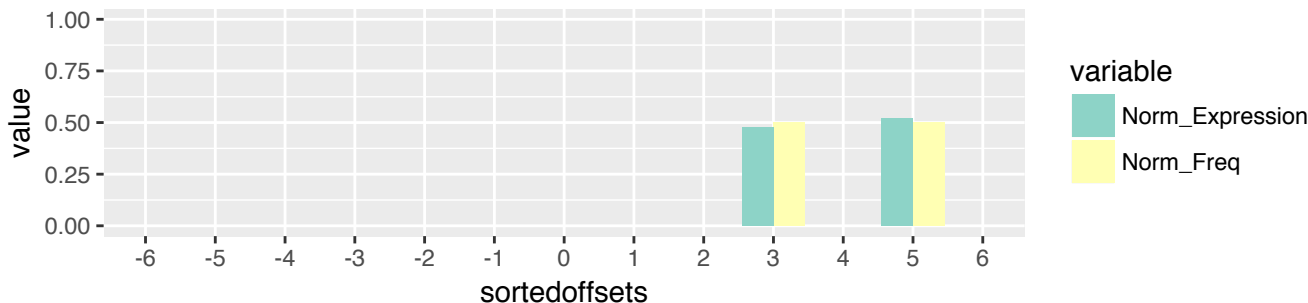

MESO (n=731)  
i-tRF & exclusive (n=150)  
5' terminus relative to 5' end of the tRNA (n=2)

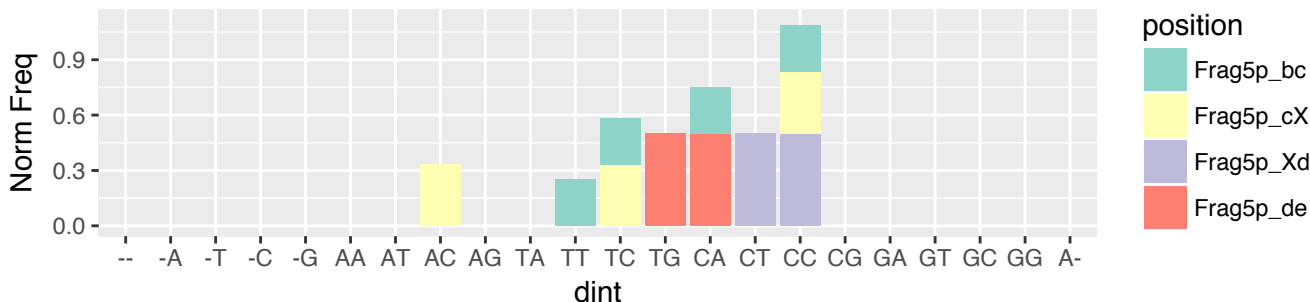

MESO (n=731)  
i-tRF & exclusive (n=150)  
5' terminus relative to 5' end of the tRNA (n=2)

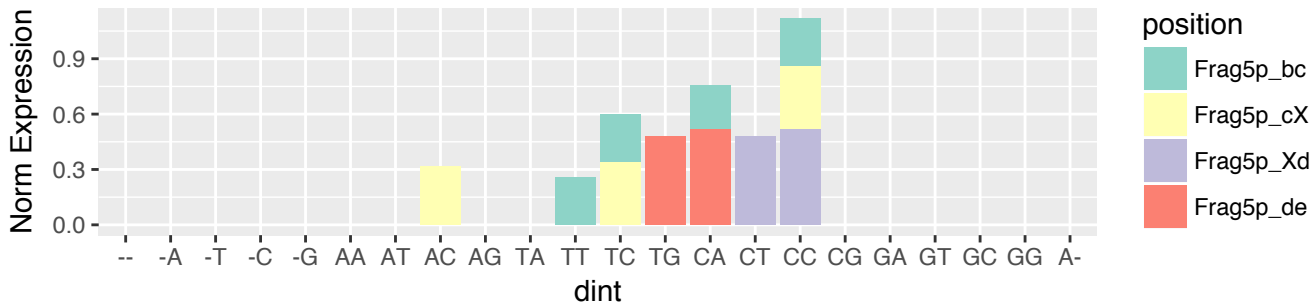

MESO (n=731)  
i-tRF & exclusive (n=150)  
5' terminus relative to 5' stem of D-loop (n=59)

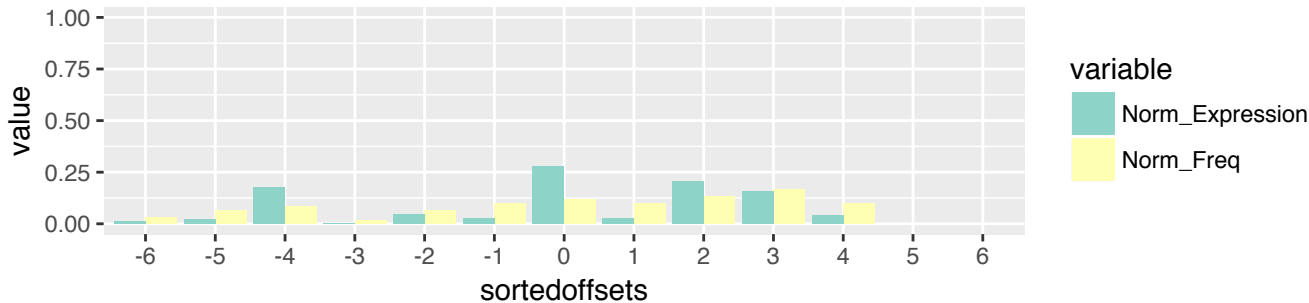

MESO (n=731)  
i-tRF & exclusive (n=150)  
5' terminus relative to 5' stem of D-loop (n=59)

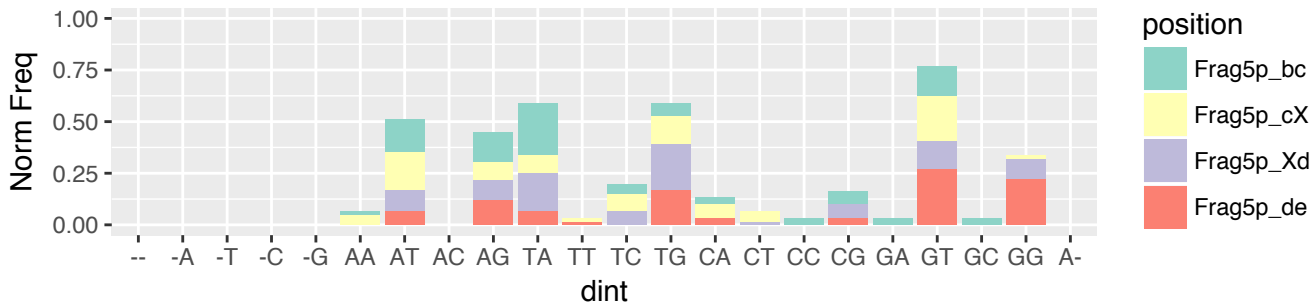

MESO (n=731)  
i-tRF & exclusive (n=150)  
5' terminus relative to 5' stem of D-loop (n=59)

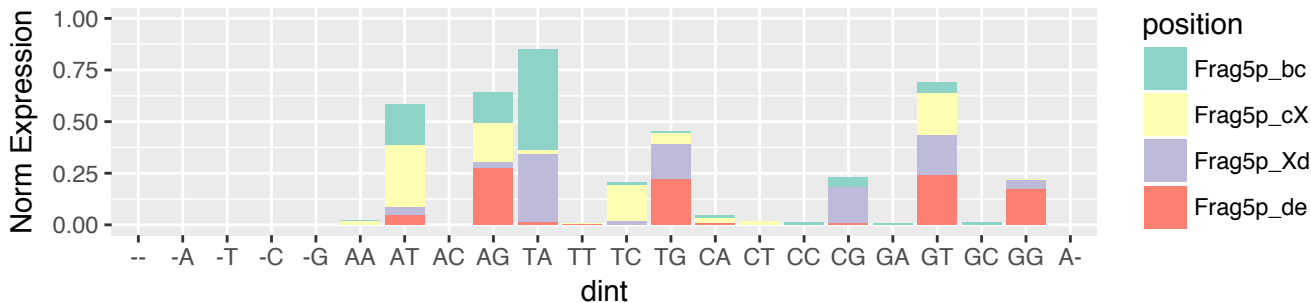

MESO (n=731)  
 i-tRF & exclusive (n=150)  
 5' terminus relative to 3' stem of D-loop (n=8)

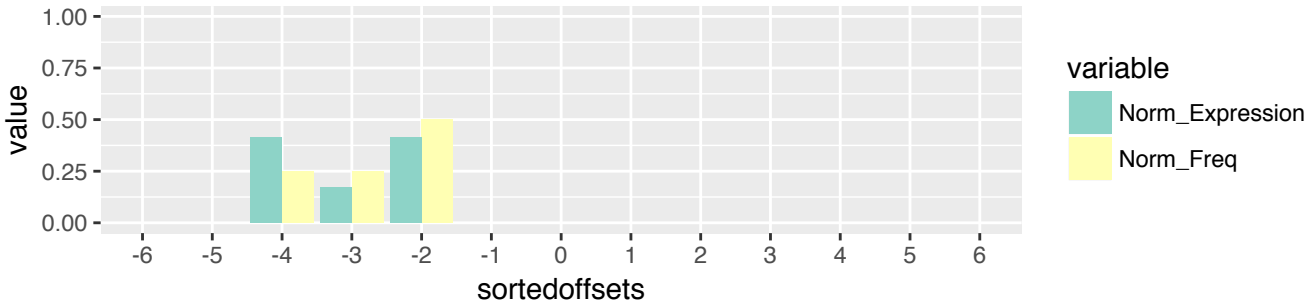

MESO (n=731)  
 i-tRF & exclusive (n=150)  
 5' terminus relative to 3' stem of D-loop (n=8)



MESO (n=731)  
 i-tRF & exclusive (n=150)  
 5' terminus relative to 3' stem of D-loop (n=8)

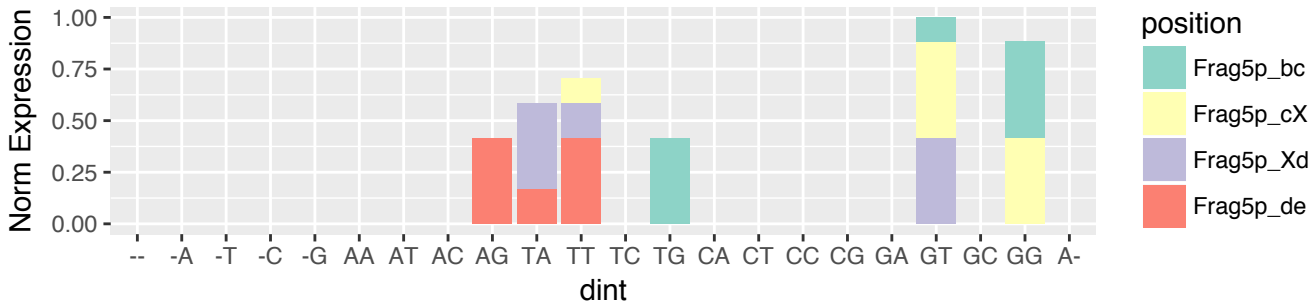

MESO (n=731)  
i-tRF & exclusive (n=150)  
5' terminus relative to 5' stem of A-loop (n=29)

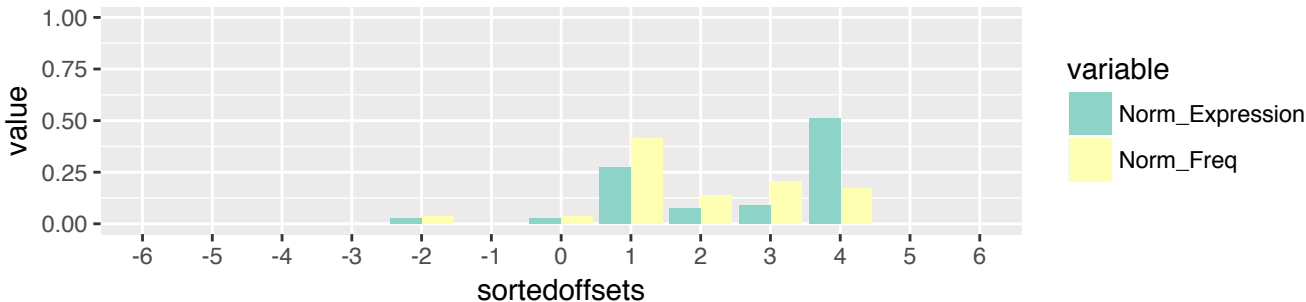

MESO (n=731)  
i-tRF & exclusive (n=150)  
5' terminus relative to 5' stem of A-loop (n=29)

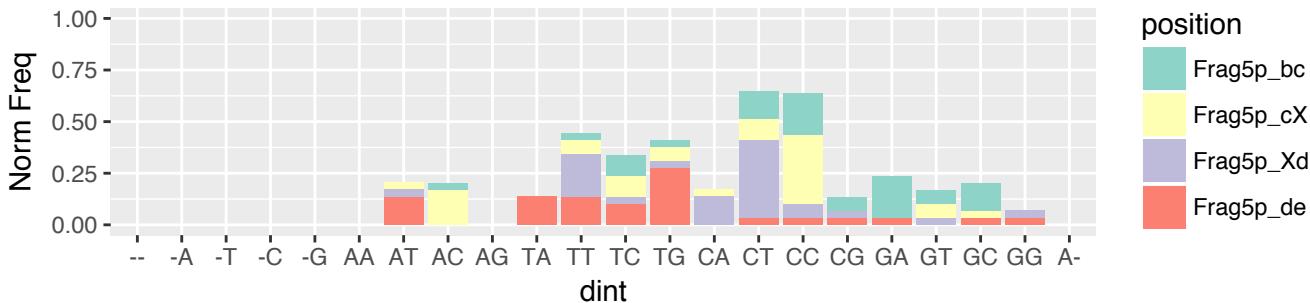

MESO (n=731)  
i-tRF & exclusive (n=150)  
5' terminus relative to 5' stem of A-loop (n=29)

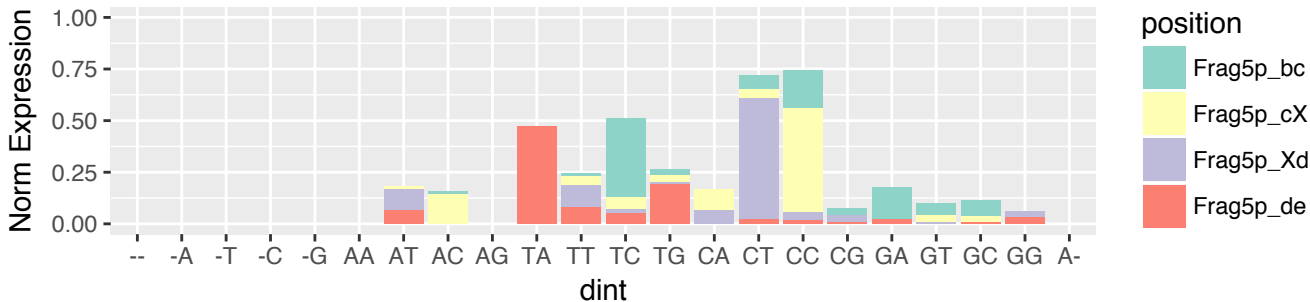

MESO (n=731)  
i-tRF & exclusive (n=150)  
5' terminus relative to 3' stem of A-loop (n=46)

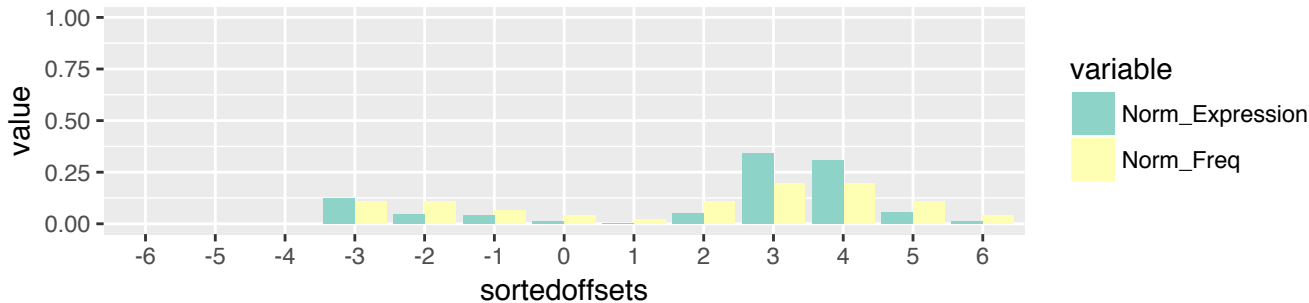

MESO (n=731)  
i-tRF & exclusive (n=150)  
5' terminus relative to 3' stem of A-loop (n=46)

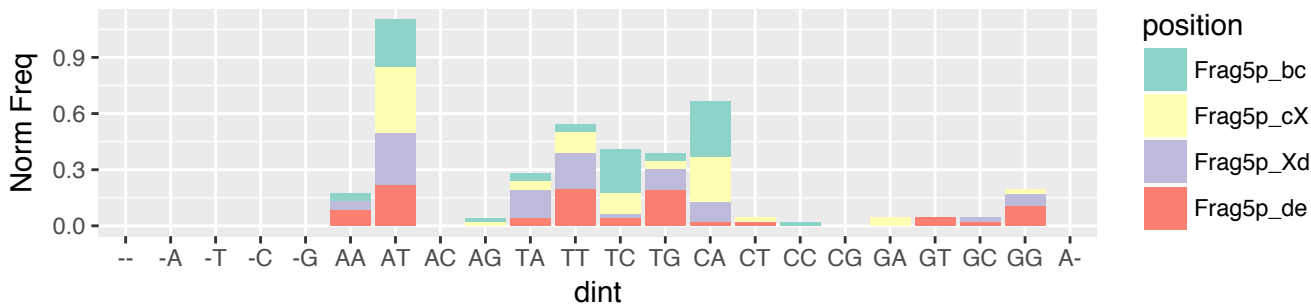

MESO (n=731)  
i-tRF & exclusive (n=150)  
5' terminus relative to 3' stem of A-loop (n=46)

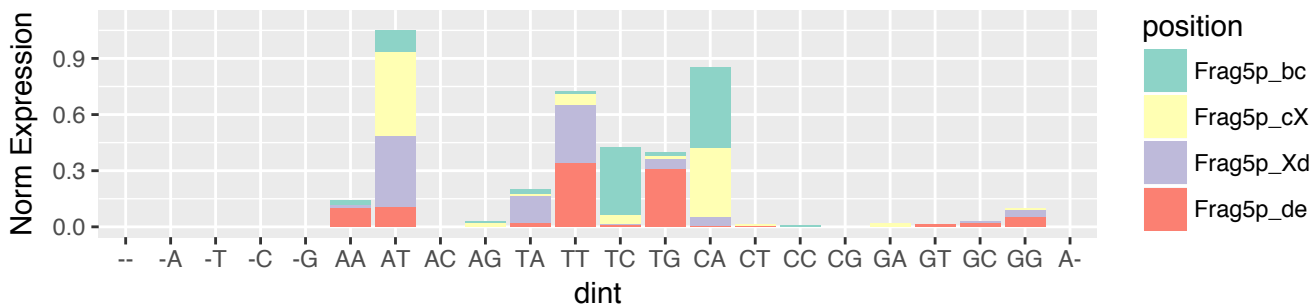

MESO (n=731)  
 i-tRF & exclusive (n=150)  
 5' terminus relative to 5' stem of T-loop (n=6)

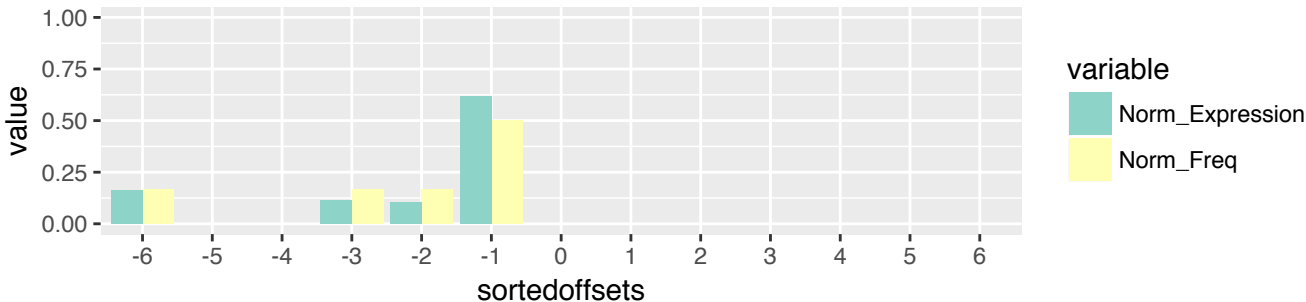

MESO (n=731)  
 i-tRF & exclusive (n=150)  
 5' terminus relative to 5' stem of T-loop (n=6)

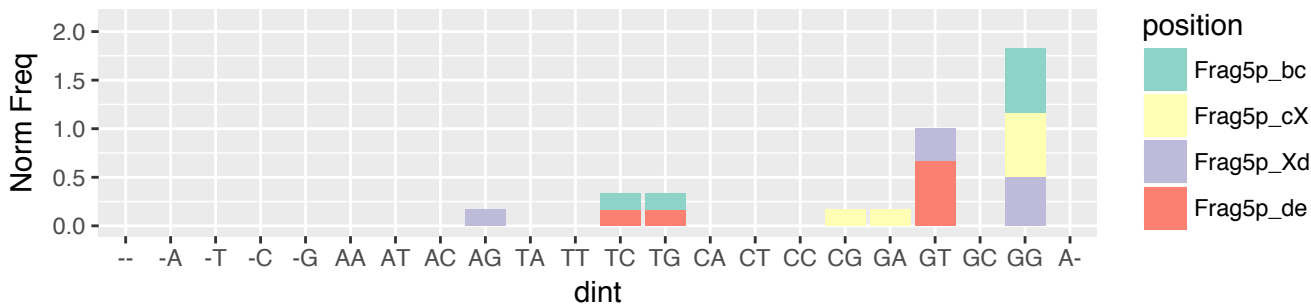

MESO (n=731)  
 i-tRF & exclusive (n=150)  
 5' terminus relative to 5' stem of T-loop (n=6)

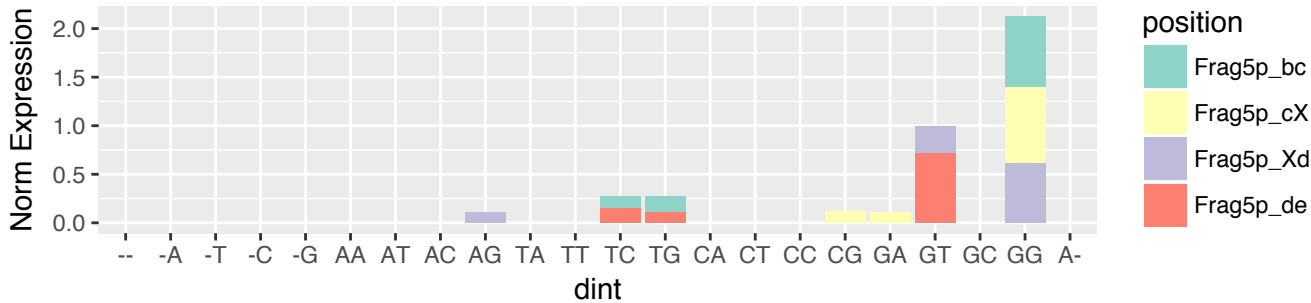



MESO (n=731)  
i-tRF & exclusive (n=150)  
3' terminus relative to 5' stem of A-loop (n=51)

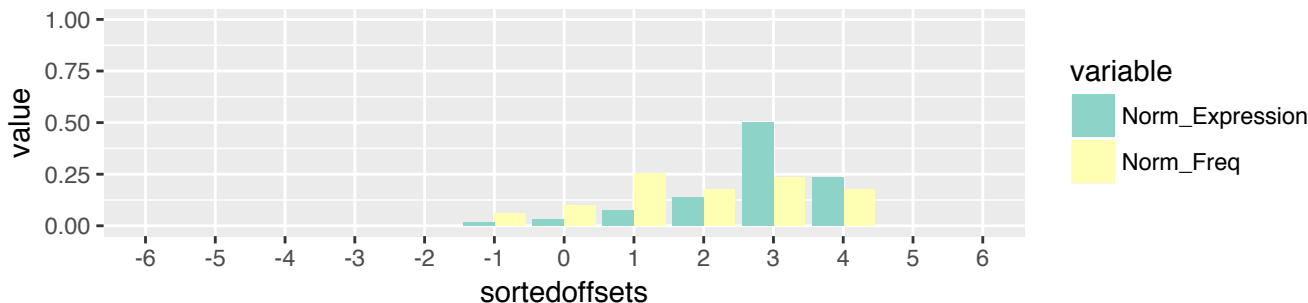

MESO (n=731)  
i-tRF & exclusive (n=150)  
3' terminus relative to 5' stem of A-loop (n=51)

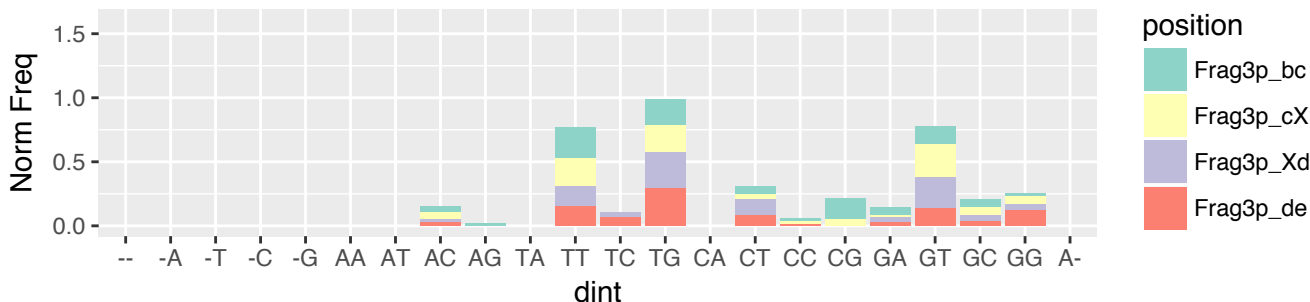

MESO (n=731)  
i-tRF & exclusive (n=150)  
3' terminus relative to 5' stem of A-loop (n=51)

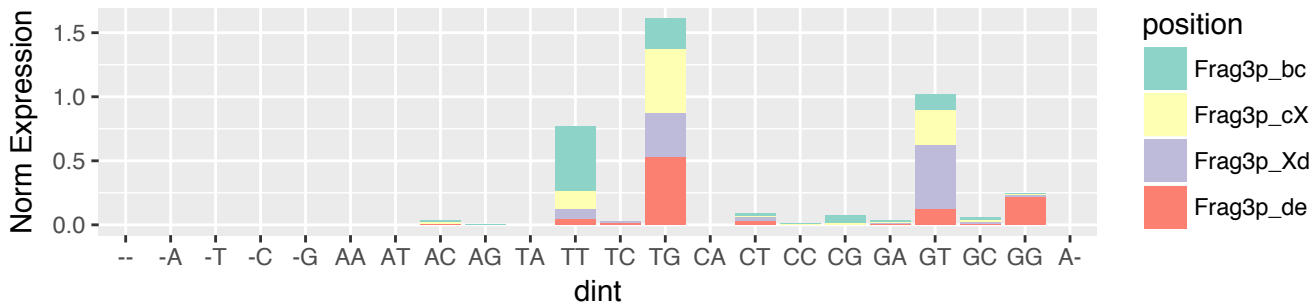

MESO (n=731)  
i-tRF & exclusive (n=150)  
3' terminus relative to 3' stem of A-loop (n=20)

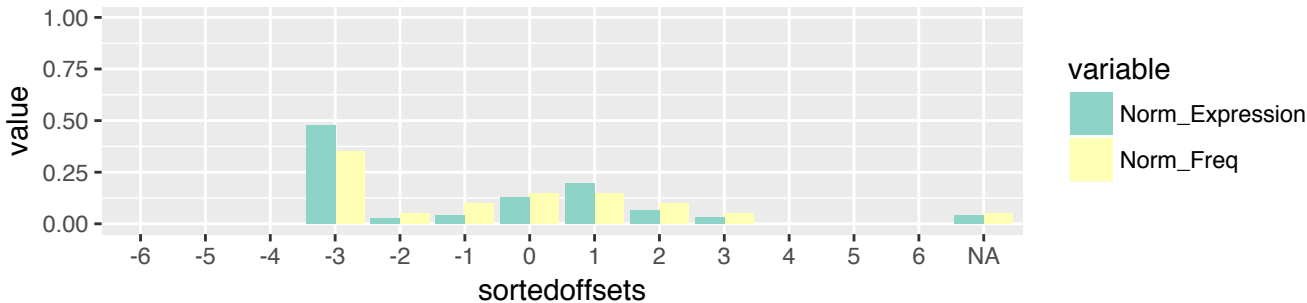

MESO (n=731)  
i-tRF & exclusive (n=150)  
3' terminus relative to 3' stem of A-loop (n=20)

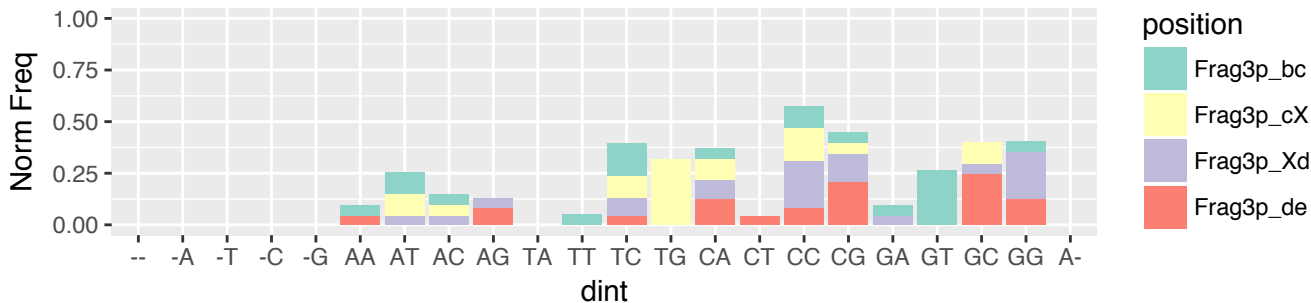

MESO (n=731)  
i-tRF & exclusive (n=150)  
3' terminus relative to 3' stem of A-loop (n=20)

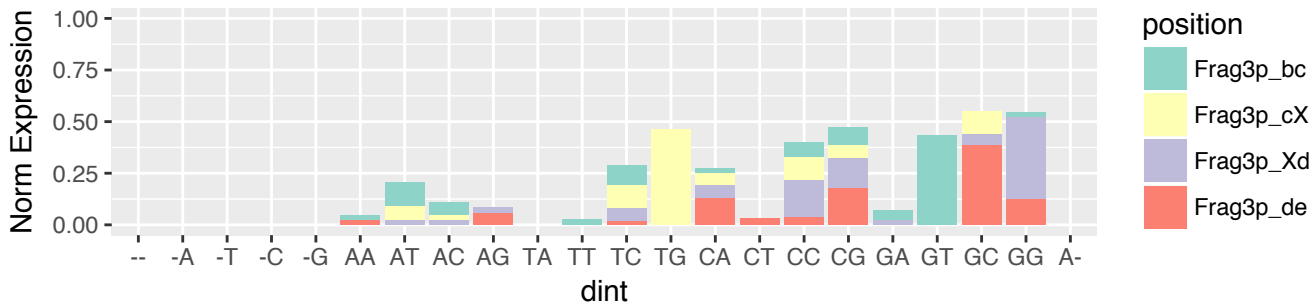

MESO (n=731)  
i-tRF & exclusive (n=150)  
3' terminus relative to 5' stem of T-loop (n=32)

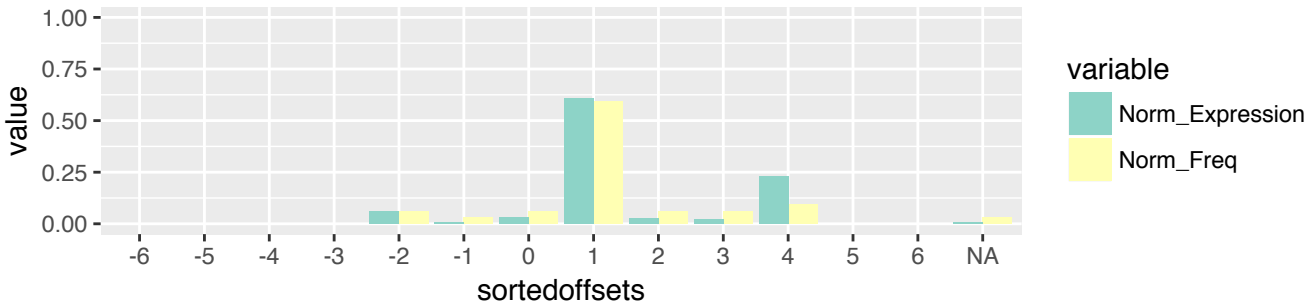

MESO (n=731)  
i-tRF & exclusive (n=150)  
3' terminus relative to 5' stem of T-loop (n=32)

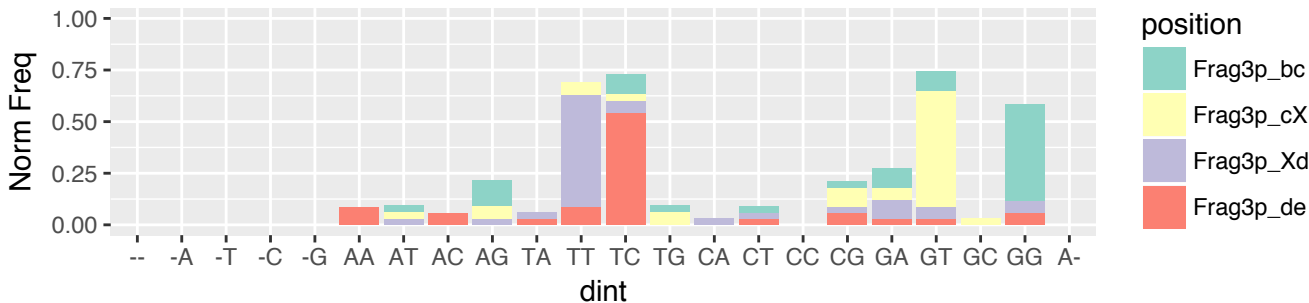

MESO (n=731)  
i-tRF & exclusive (n=150)  
3' terminus relative to 5' stem of T-loop (n=32)

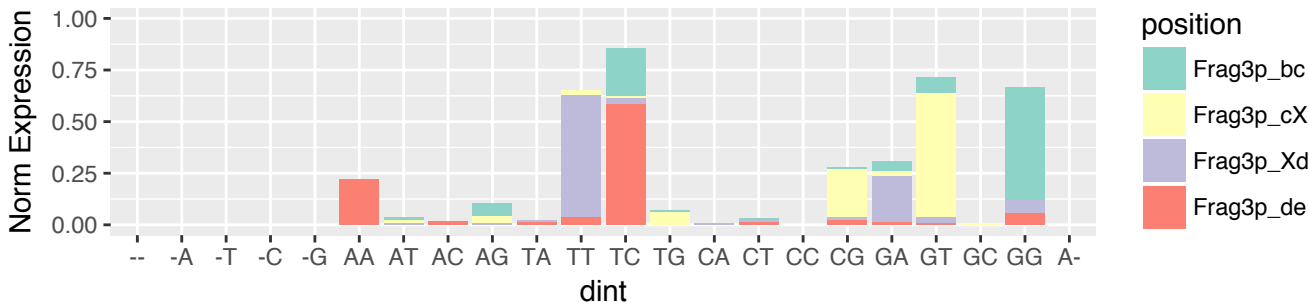

MESO (n=731)  
i-tRF & exclusive (n=150)  
3' terminus relative to 3' stem of T-loop (n=36)

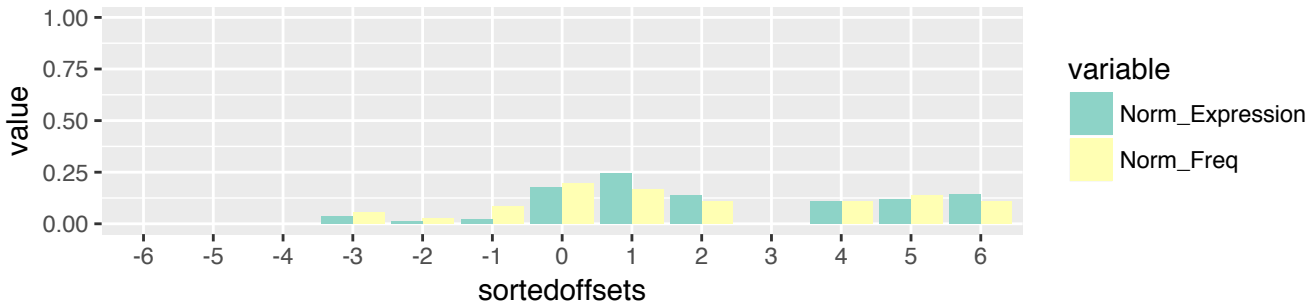

MESO (n=731)  
i-tRF & exclusive (n=150)  
3' terminus relative to 3' stem of T-loop (n=36)

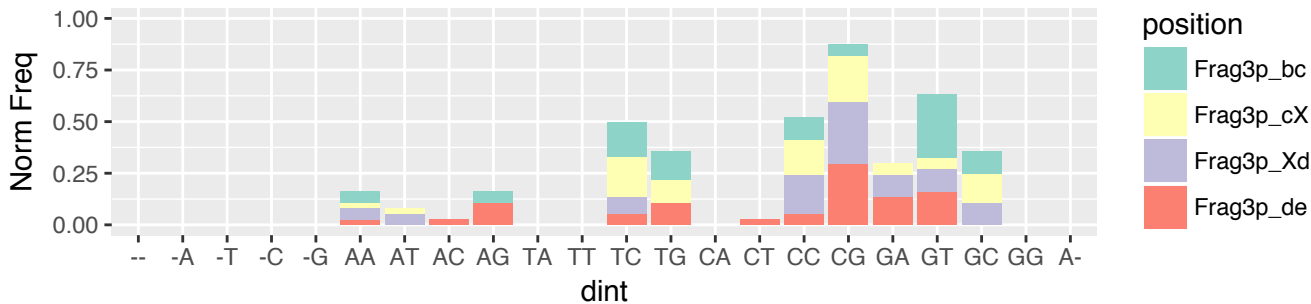

MESO (n=731)  
i-tRF & exclusive (n=150)  
3' terminus relative to 3' stem of T-loop (n=36)

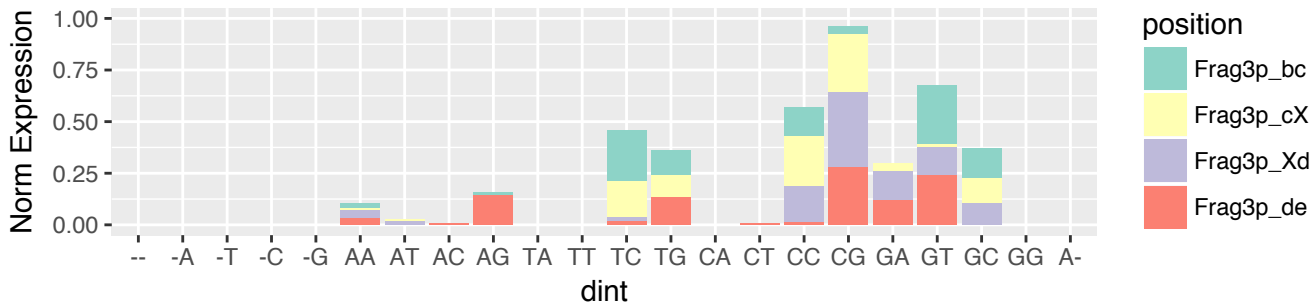

MESO (n=731)  
 i-tRF & exclusive (n=150)  
 3' terminus relative to 3' end of the tRNA (n=12)

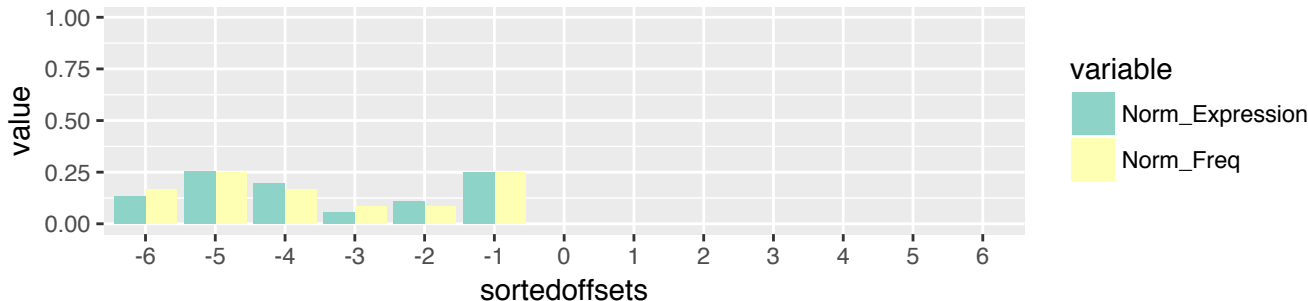

MESO (n=731)  
 i-tRF & exclusive (n=150)  
 3' terminus relative to 3' end of the tRNA (n=12)

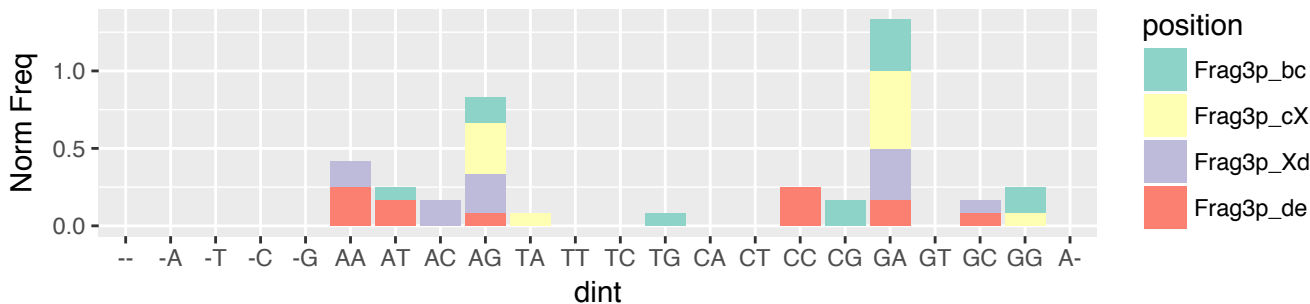

MESO (n=731)  
 i-tRF & exclusive (n=150)  
 3' terminus relative to 3' end of the tRNA (n=12)

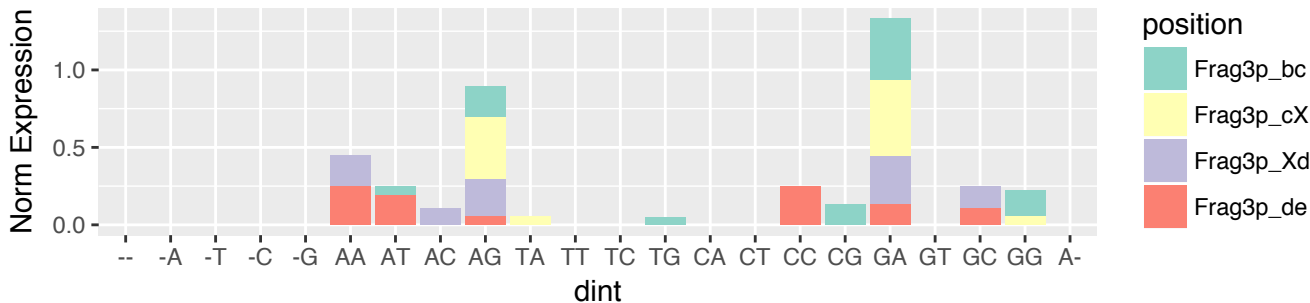

MESO (n=731)  
 3'-tRF & exclusive (n=103)  
 5' terminus relative to 5' stem of T-loop (n=76)

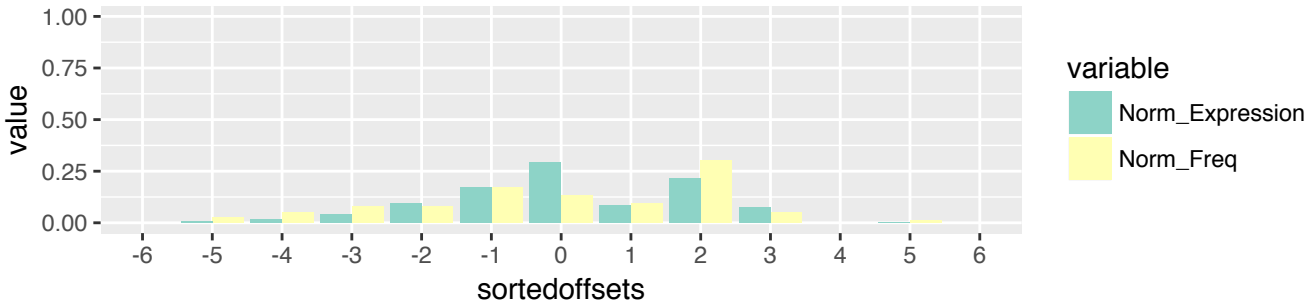

MESO (n=731)  
 3'-tRF & exclusive (n=103)  
 5' terminus relative to 5' stem of T-loop (n=76)

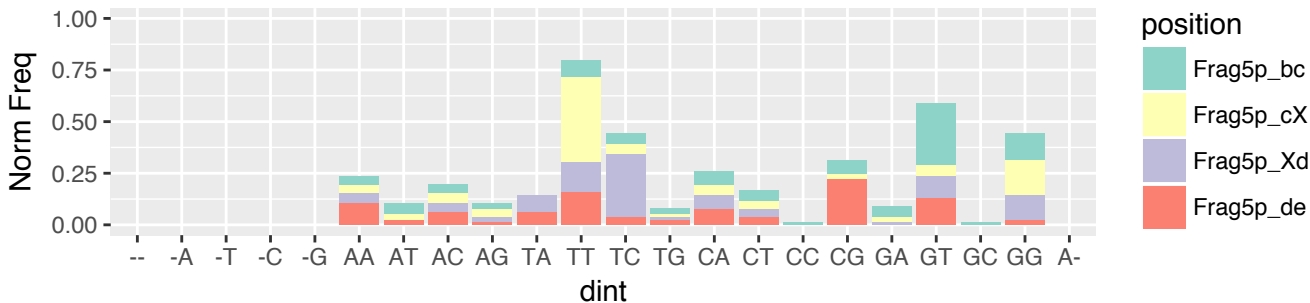

MESO (n=731)  
 3'-tRF & exclusive (n=103)  
 5' terminus relative to 5' stem of T-loop (n=76)

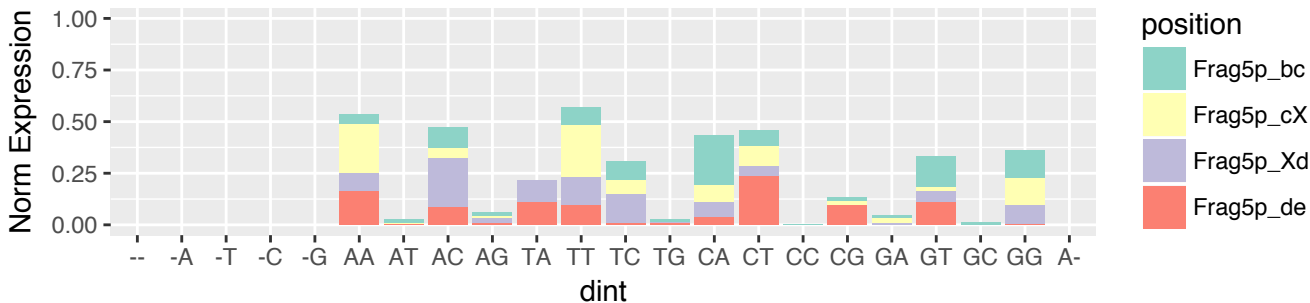

MESO (n=731)  
 3'-tRF & exclusive (n=103)  
 5' terminus relative to 3' stem of T-loop (n=27)

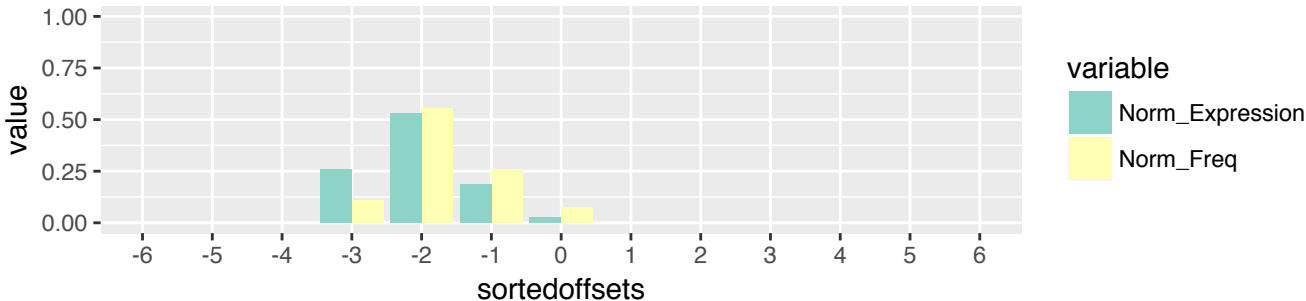

MESO (n=731)  
 3'-tRF & exclusive (n=103)  
 5' terminus relative to 3' stem of T-loop (n=27)

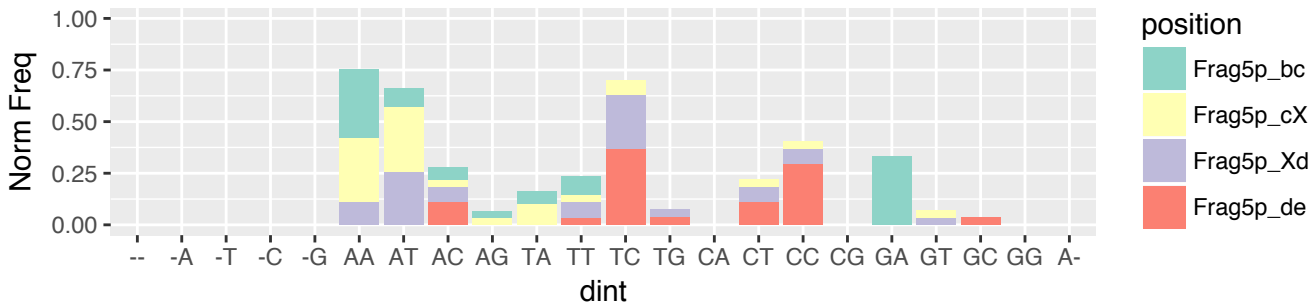

MESO (n=731)  
 3'-tRF & exclusive (n=103)  
 5' terminus relative to 3' stem of T-loop (n=27)

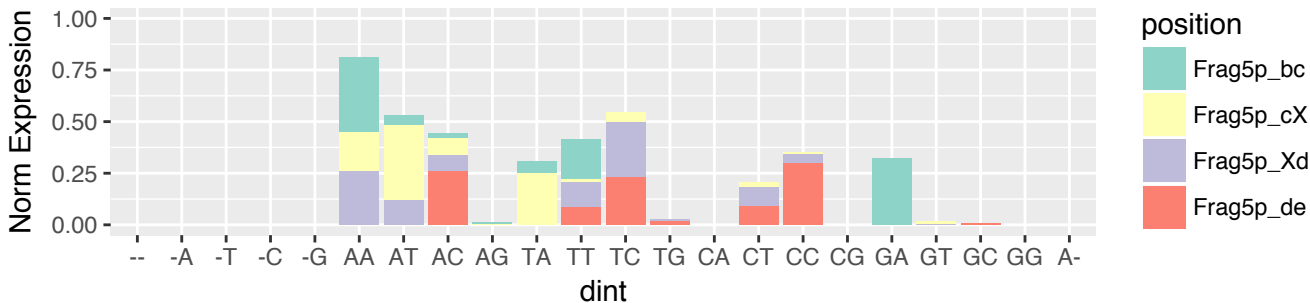

MESO (n=731)  
 3'-tRF & exclusive (n=103)  
 3' terminus relative to 3' end of the tRNA (n=103)

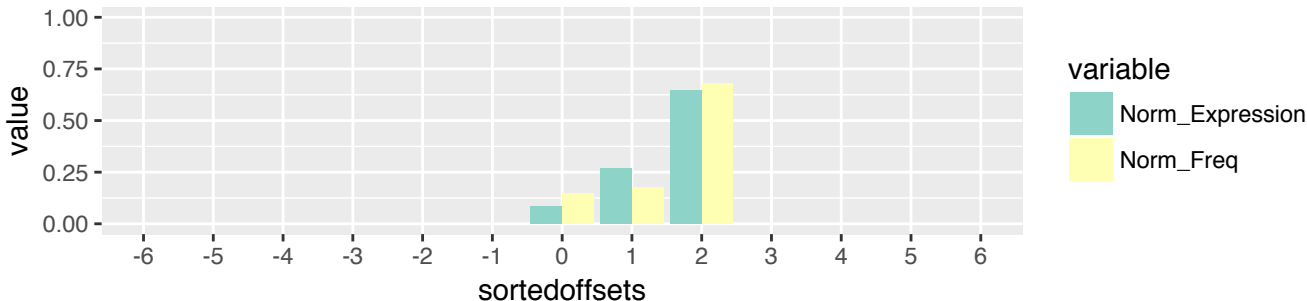

MESO (n=731)  
 3'-tRF & exclusive (n=103)  
 3' terminus relative to 3' end of the tRNA (n=103)

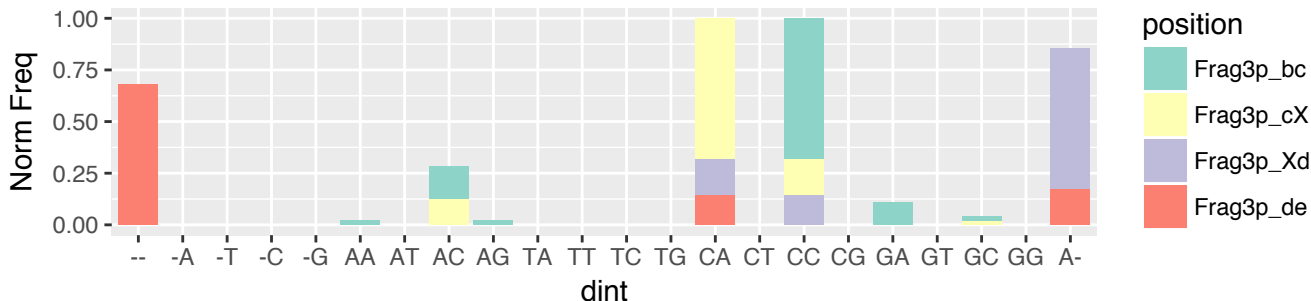

MESO (n=731)  
 3'-tRF & exclusive (n=103)  
 3' terminus relative to 3' end of the tRNA (n=103)

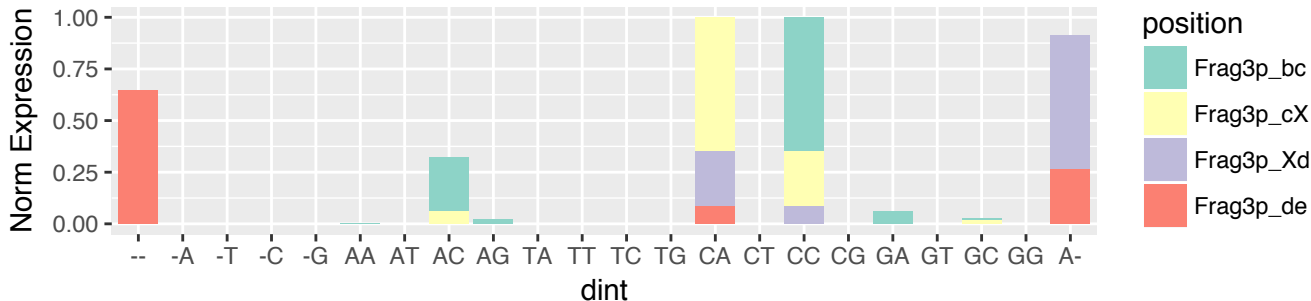



OV (n=871)  
5'-half & exclusive (n=2)  
5' terminus relative to 5' end of the tRNA (n=2)



OV (n=871)  
5'-half & exclusive (n=2)  
5' terminus relative to 5' end of the tRNA (n=2)

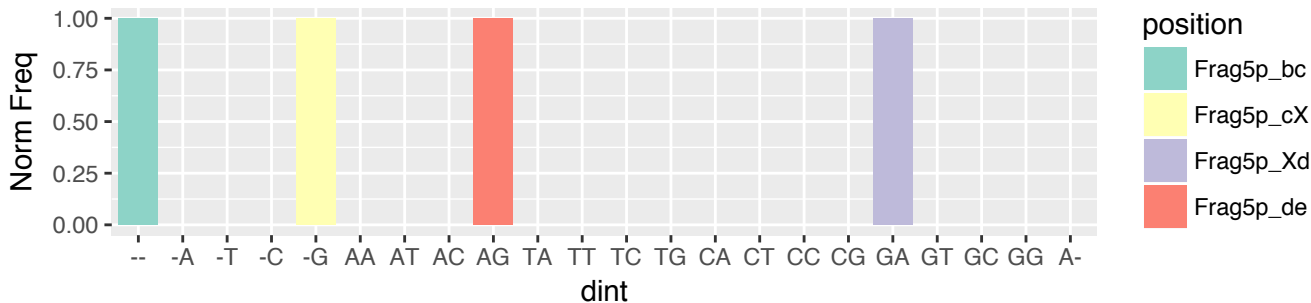

OV (n=871)  
5'-half & exclusive (n=2)  
5' terminus relative to 5' end of the tRNA (n=2)

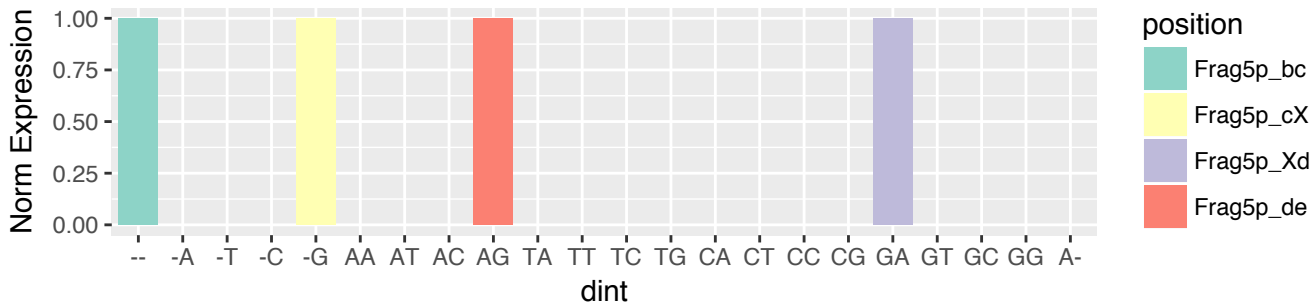

OV (n=871)  
 5'-half & exclusive (n=2)  
 3' terminus relative to 5' stem of A-loop (n=2)

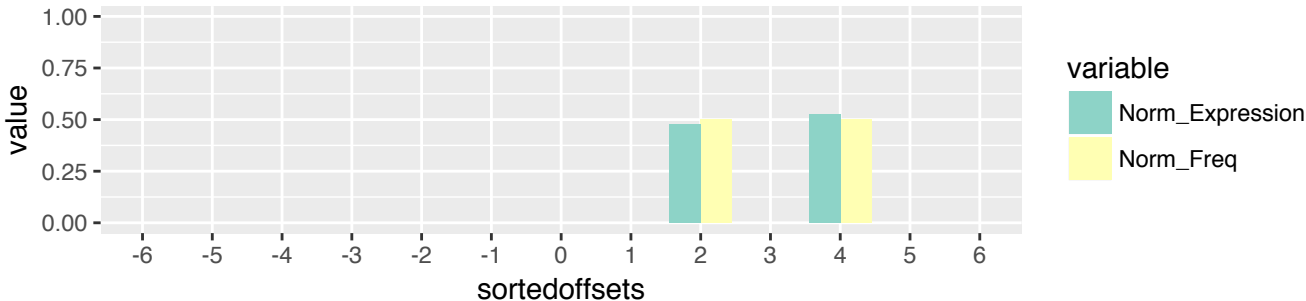

OV (n=871)  
 5'-half & exclusive (n=2)  
 3' terminus relative to 5' stem of A-loop (n=2)

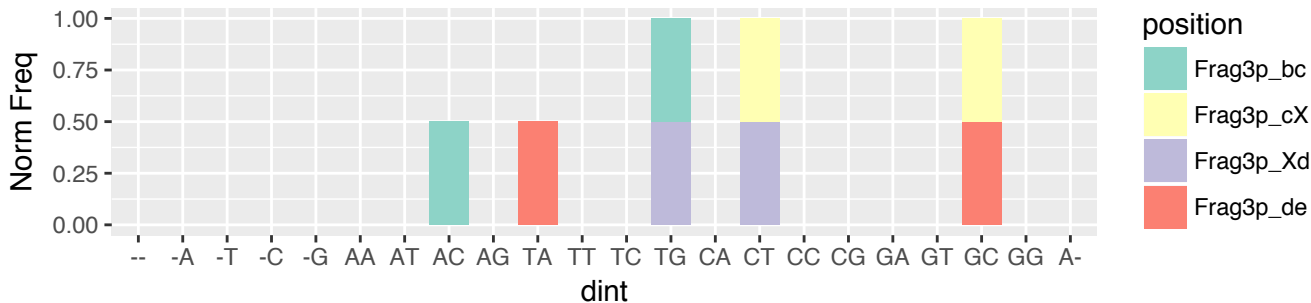

OV (n=871)  
 5'-half & exclusive (n=2)  
 3' terminus relative to 5' stem of A-loop (n=2)

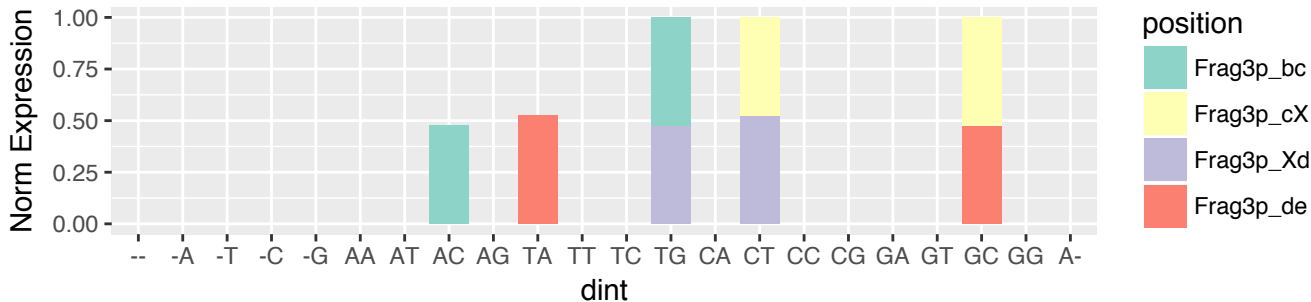

OV (n=871)

5'-tRF & exclusive (n=97)

5' terminus relative to 5' end of the tRNA (n=97)

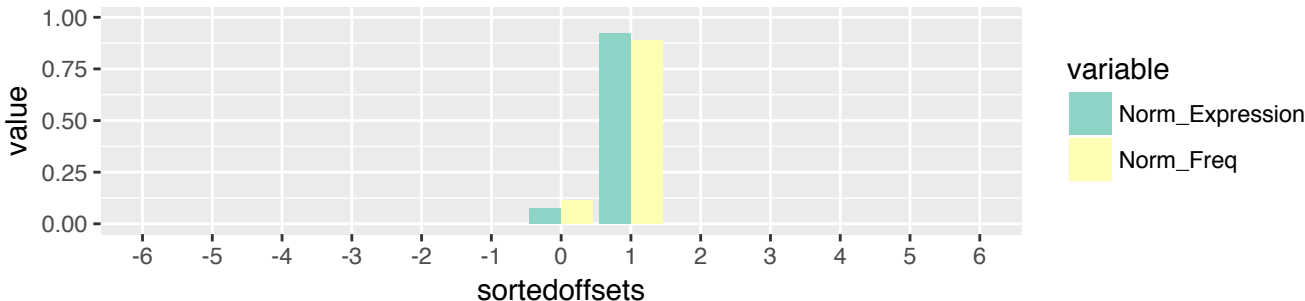

OV (n=871)

5'-tRF & exclusive (n=97)

5' terminus relative to 5' end of the tRNA (n=97)

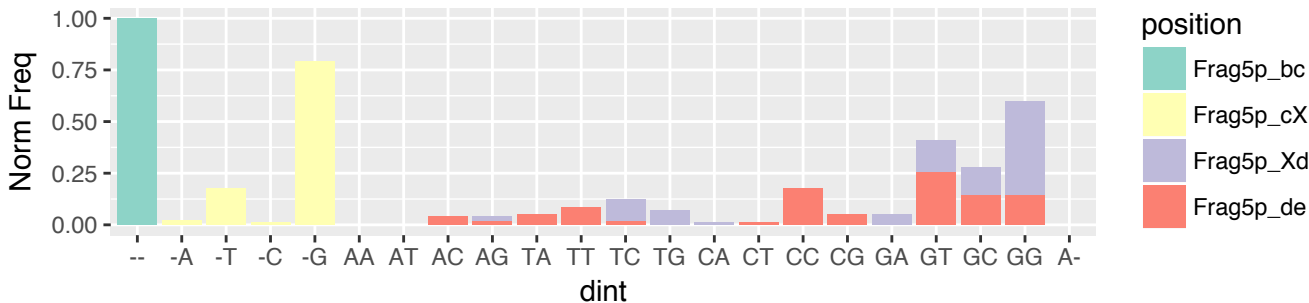

OV (n=871)

5'-tRF & exclusive (n=97)

5' terminus relative to 5' end of the tRNA (n=97)

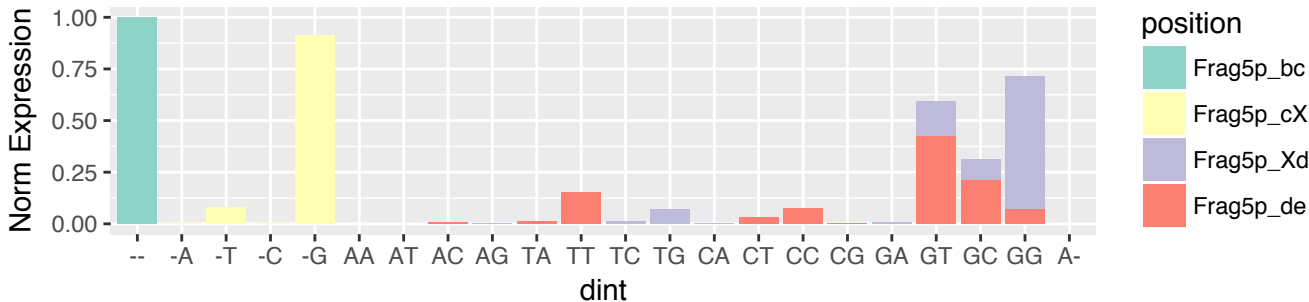

OV (n=871)  
 5'-tRF & exclusive (n=97)  
 3' terminus relative to 5' stem of D-loop (n=6)

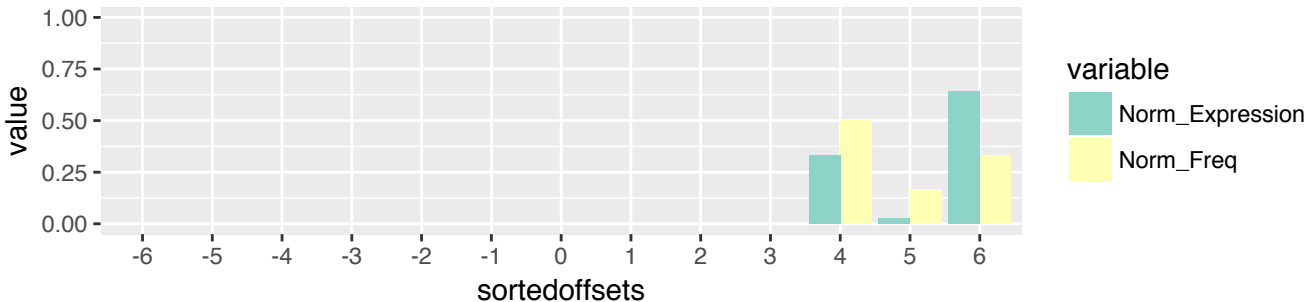

OV (n=871)  
 5'-tRF & exclusive (n=97)  
 3' terminus relative to 5' stem of D-loop (n=6)

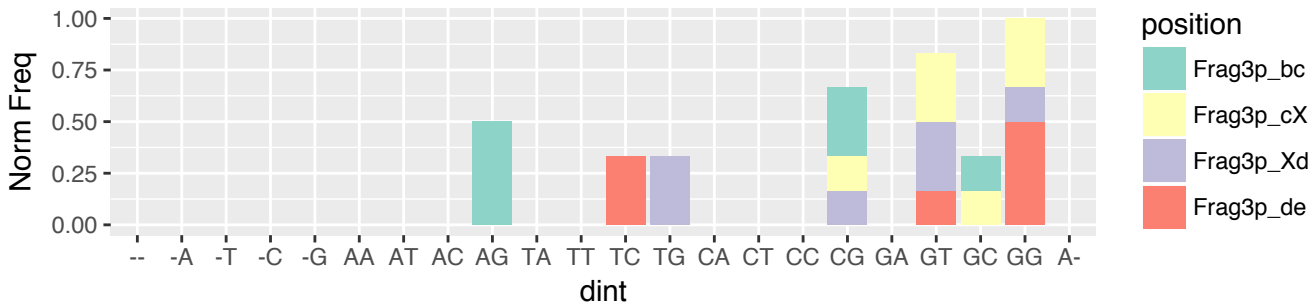

OV (n=871)  
 5'-tRF & exclusive (n=97)  
 3' terminus relative to 5' stem of D-loop (n=6)

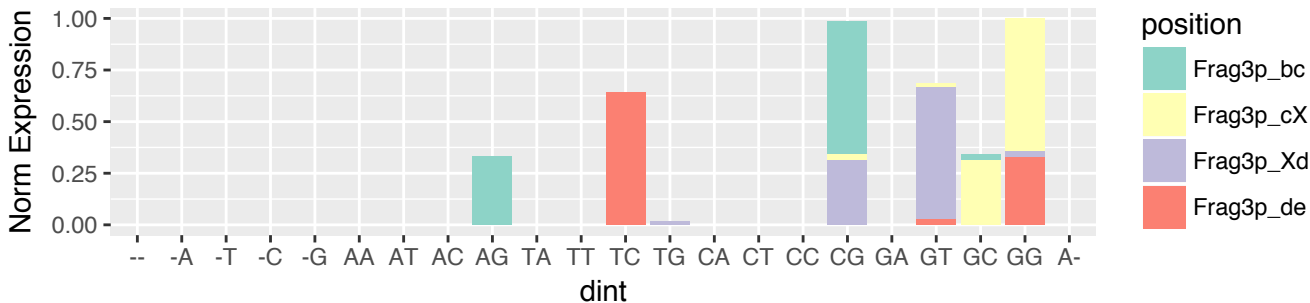

OV (n=871)  
 5'-tRF & exclusive (n=97)  
 3' terminus relative to 3' stem of D-loop (n=88)

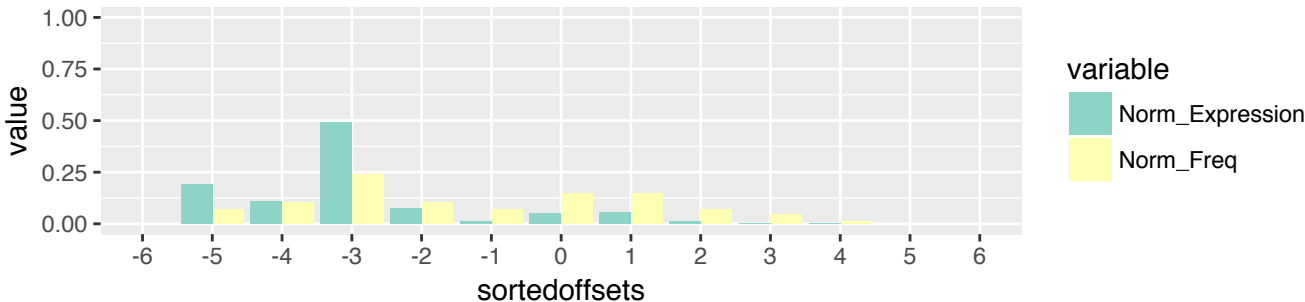

OV (n=871)  
 5'-tRF & exclusive (n=97)  
 3' terminus relative to 3' stem of D-loop (n=88)

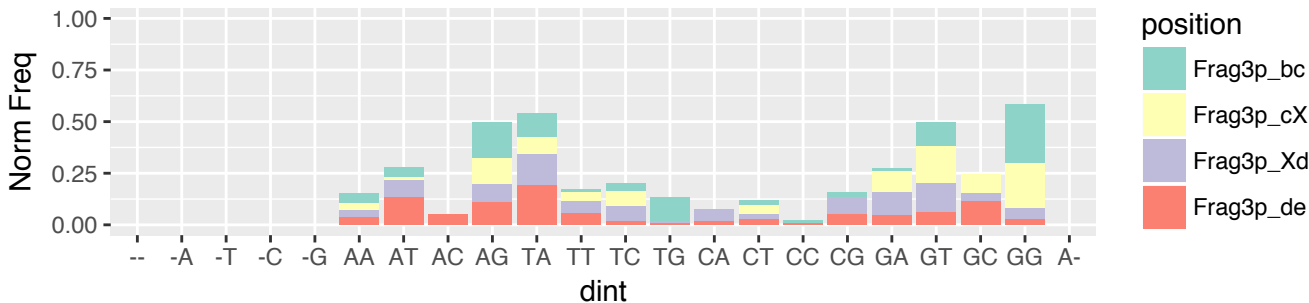

OV (n=871)  
 5'-tRF & exclusive (n=97)  
 3' terminus relative to 3' stem of D-loop (n=88)

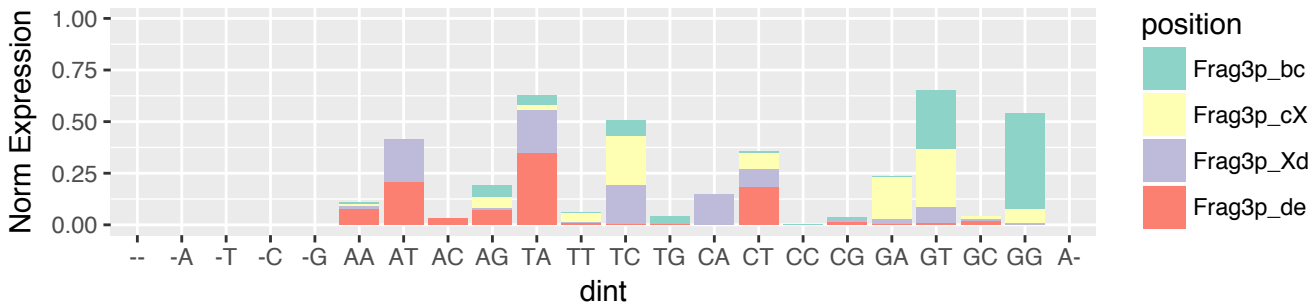

OV (n=871)  
5'-tRF & exclusive (n=97)  
3' terminus relative to 5' stem of A-loop (n=1)

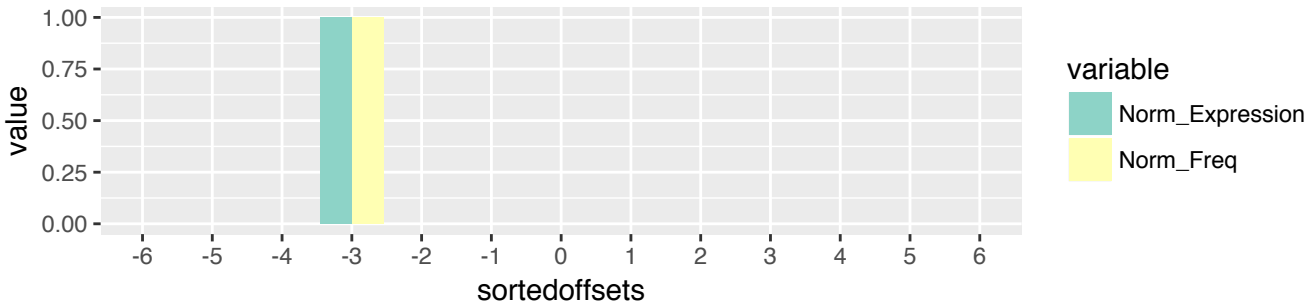

OV (n=871)  
5'-tRF & exclusive (n=97)  
3' terminus relative to 5' stem of A-loop (n=1)

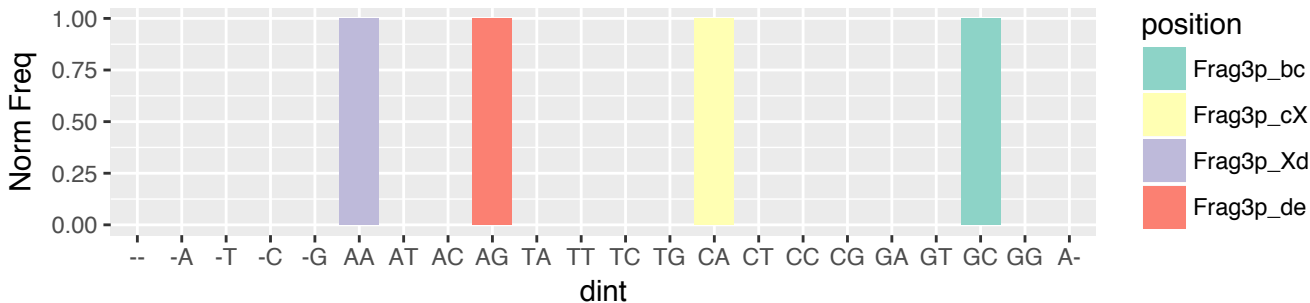

OV (n=871)  
5'-tRF & exclusive (n=97)  
3' terminus relative to 5' stem of A-loop (n=1)

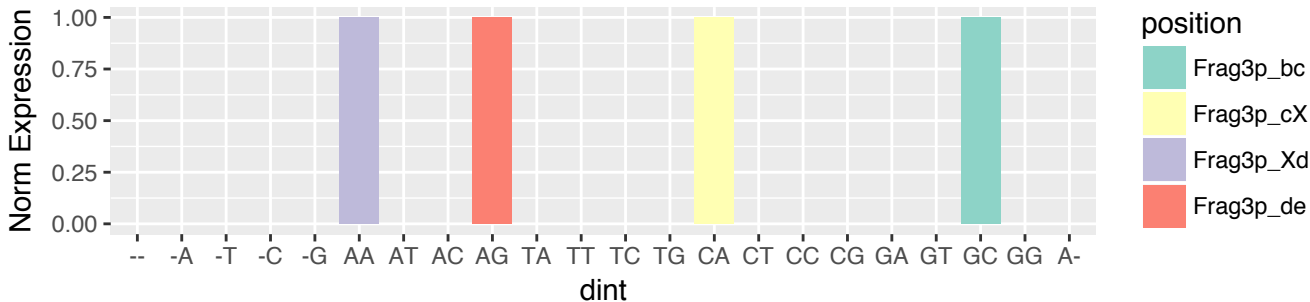

OV (n=871)  
 5'-tRF & exclusive (n=97)  
 3' terminus relative to 3' stem of A-loop (n=2)

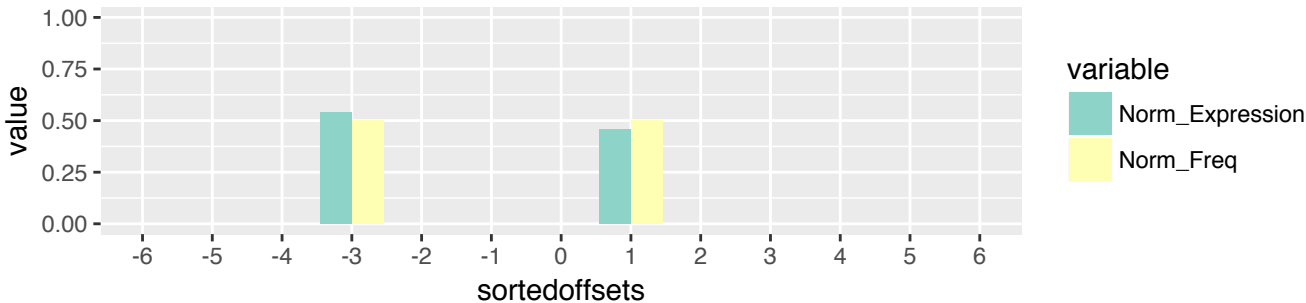

OV (n=871)  
 5'-tRF & exclusive (n=97)  
 3' terminus relative to 3' stem of A-loop (n=2)

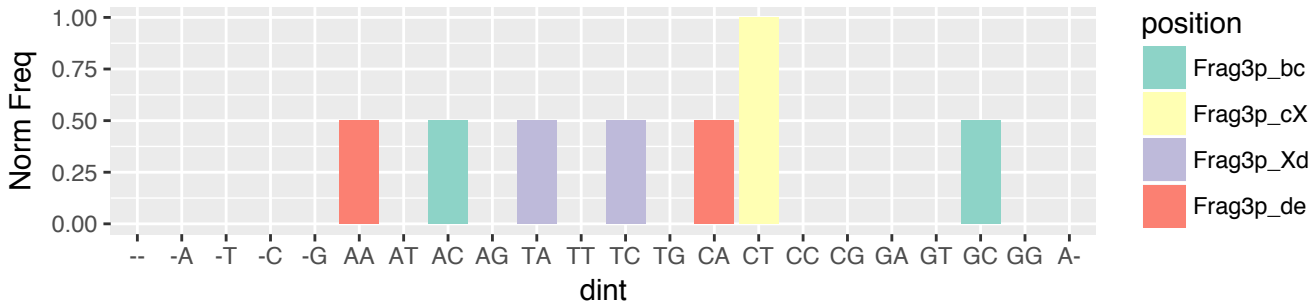

OV (n=871)  
 5'-tRF & exclusive (n=97)  
 3' terminus relative to 3' stem of A-loop (n=2)

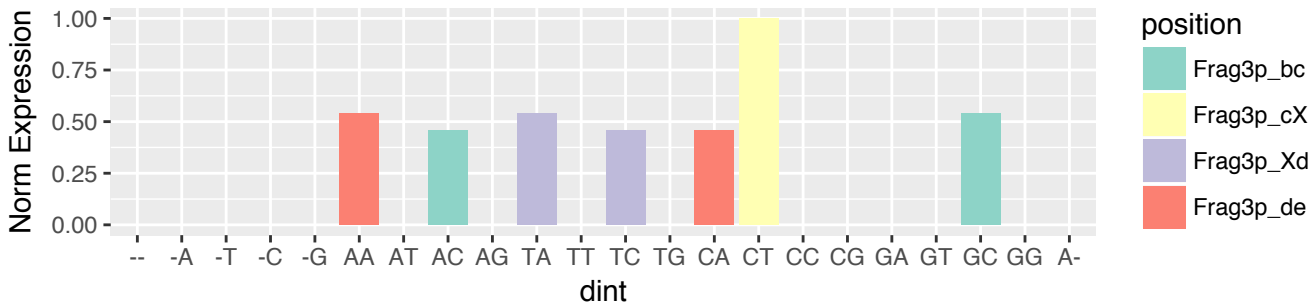

OV (n=871)  
i-tRF & exclusive (n=194)  
5' terminus relative to 5' end of the tRNA (n=2)

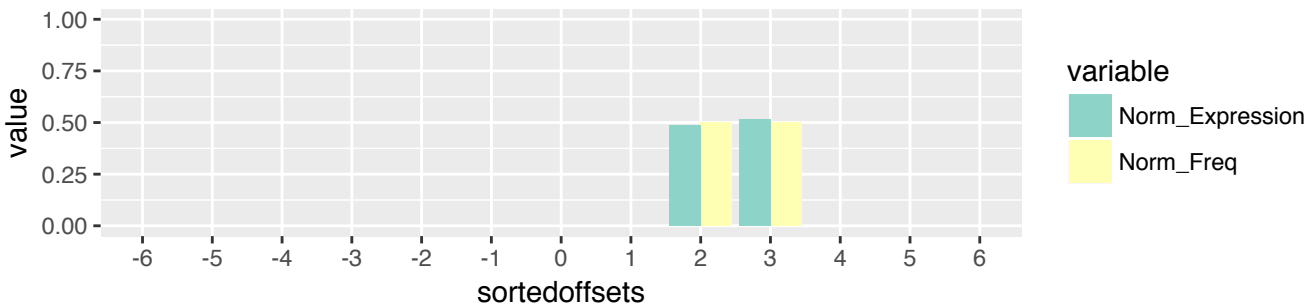

OV (n=871)  
i-tRF & exclusive (n=194)  
5' terminus relative to 5' end of the tRNA (n=2)

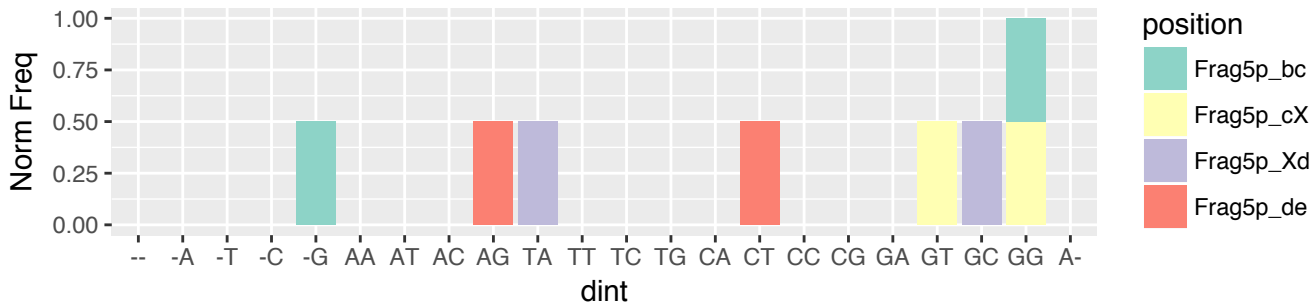

OV (n=871)  
i-tRF & exclusive (n=194)  
5' terminus relative to 5' end of the tRNA (n=2)

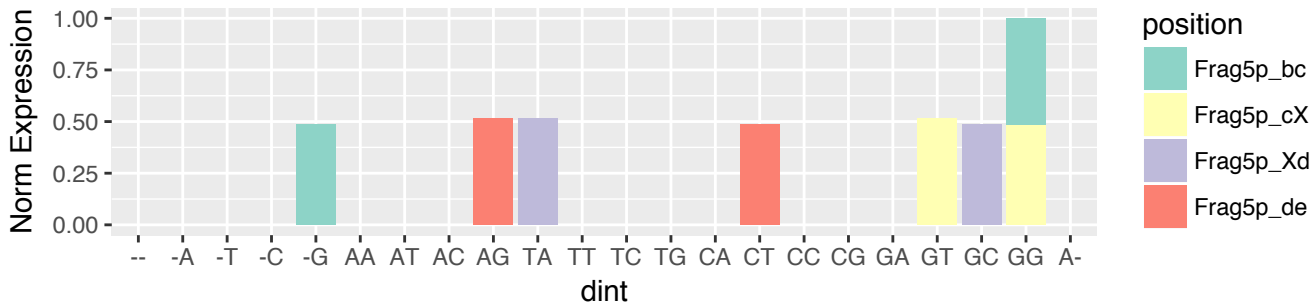



OV (n=871)  
 i-tRF & exclusive (n=194)  
 5' terminus relative to 5' stem of D-loop (n=69)

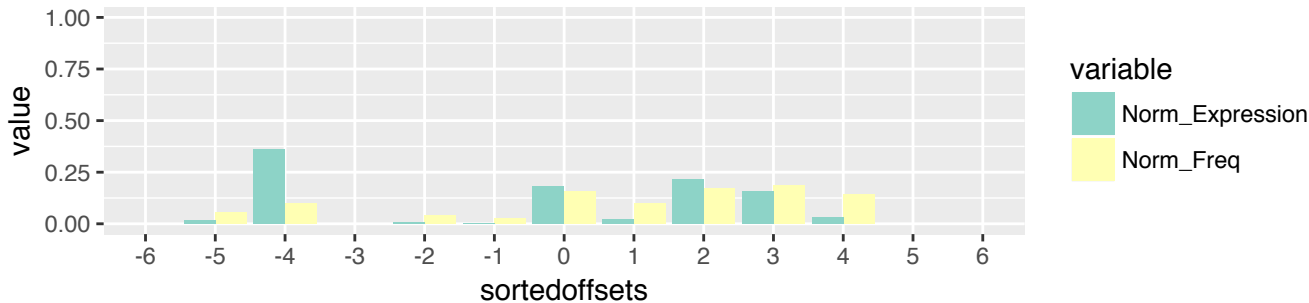

OV (n=871)  
 i-tRF & exclusive (n=194)  
 5' terminus relative to 5' stem of D-loop (n=69)

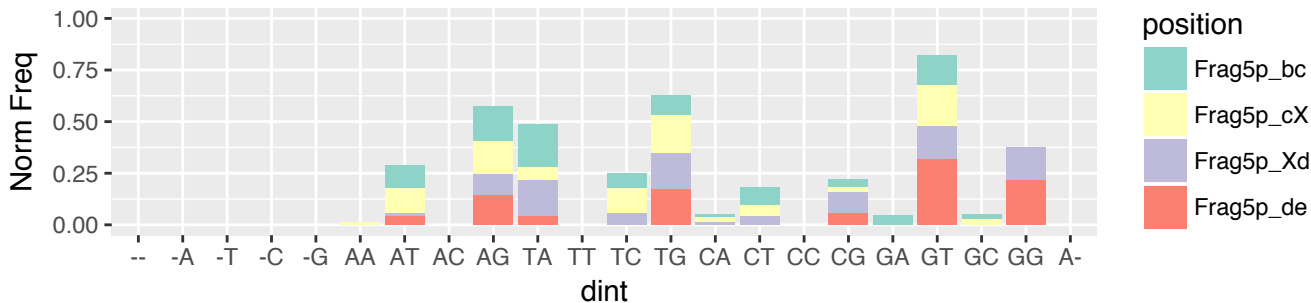

OV (n=871)  
 i-tRF & exclusive (n=194)  
 5' terminus relative to 5' stem of D-loop (n=69)

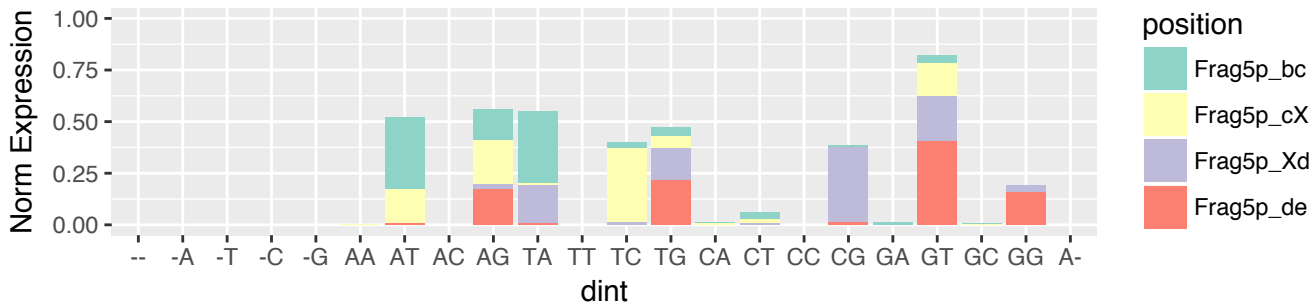

OV (n=871)  
 i-tRF & exclusive (n=194)  
 5' terminus relative to 3' stem of D-loop (n=8)

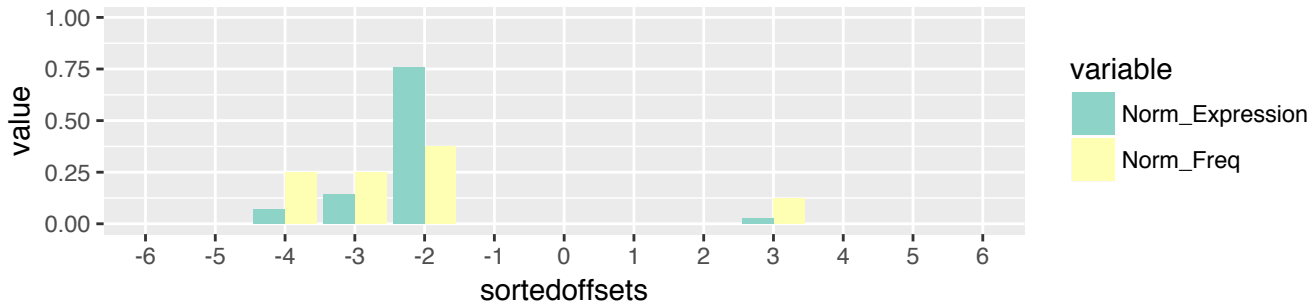

OV (n=871)  
 i-tRF & exclusive (n=194)  
 5' terminus relative to 3' stem of D-loop (n=8)

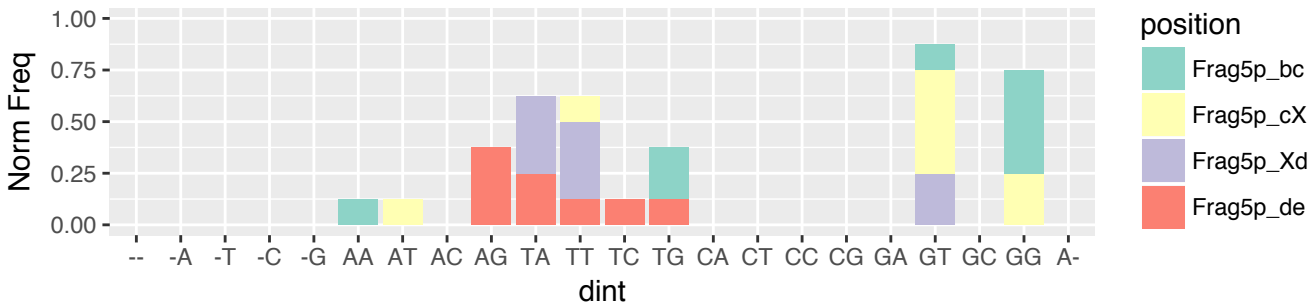

OV (n=871)  
 i-tRF & exclusive (n=194)  
 5' terminus relative to 3' stem of D-loop (n=8)

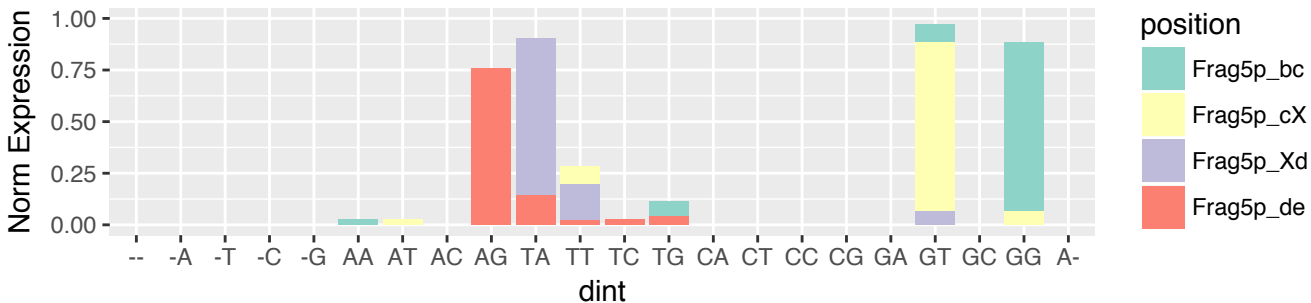

OV (n=871)  
 i-tRF & exclusive (n=194)  
 5' terminus relative to 5' stem of A-loop (n=50)

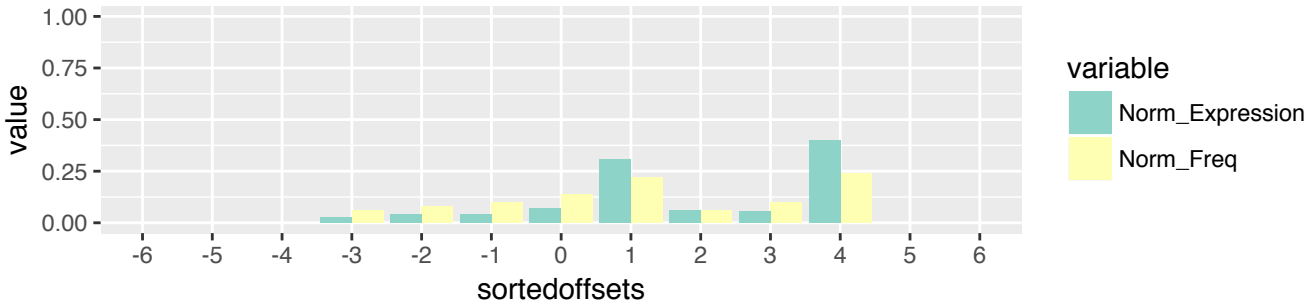

OV (n=871)  
 i-tRF & exclusive (n=194)  
 5' terminus relative to 5' stem of A-loop (n=50)

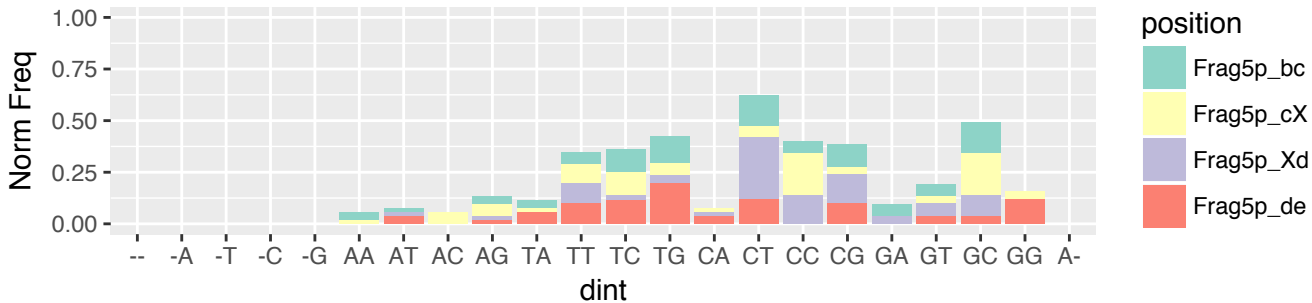

OV (n=871)  
 i-tRF & exclusive (n=194)  
 5' terminus relative to 5' stem of A-loop (n=50)

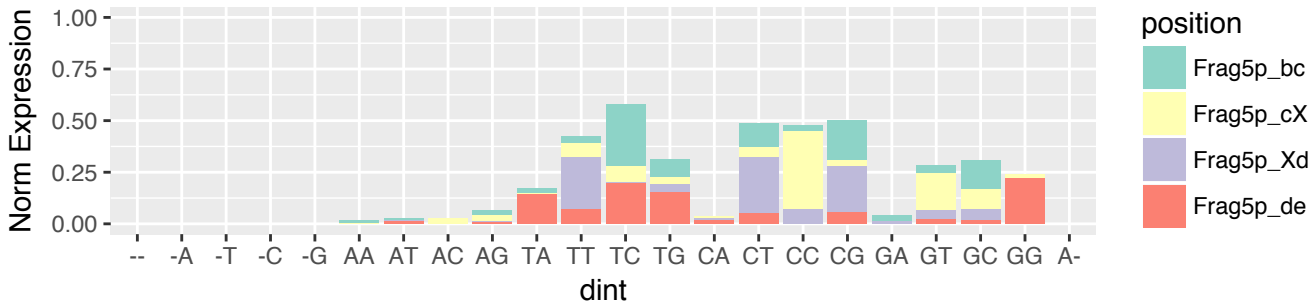

OV (n=871)  
 i-tRF & exclusive (n=194)  
 5' terminus relative to 3' stem of A-loop (n=54)

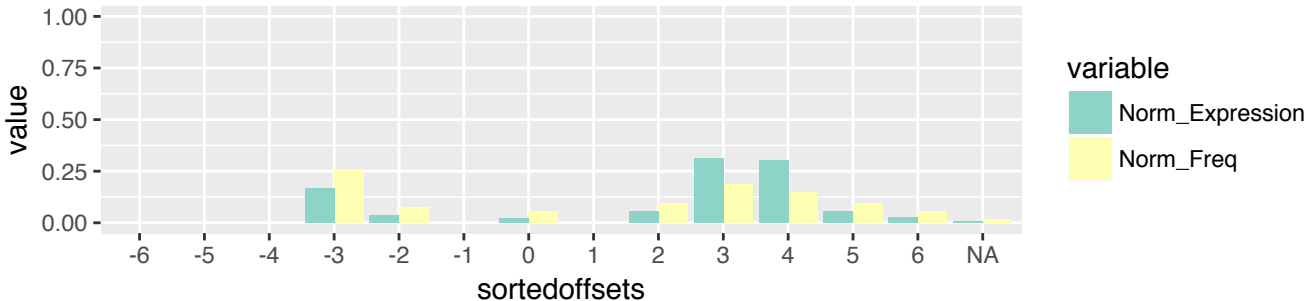

OV (n=871)  
 i-tRF & exclusive (n=194)  
 5' terminus relative to 3' stem of A-loop (n=54)

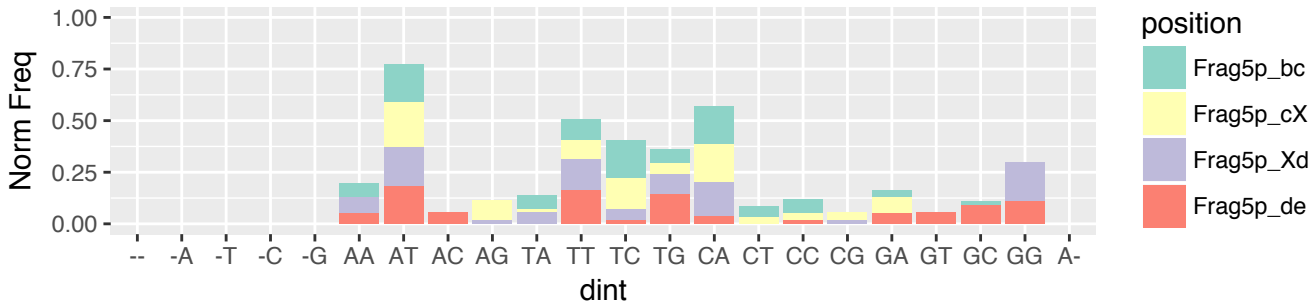

OV (n=871)  
 i-tRF & exclusive (n=194)  
 5' terminus relative to 3' stem of A-loop (n=54)

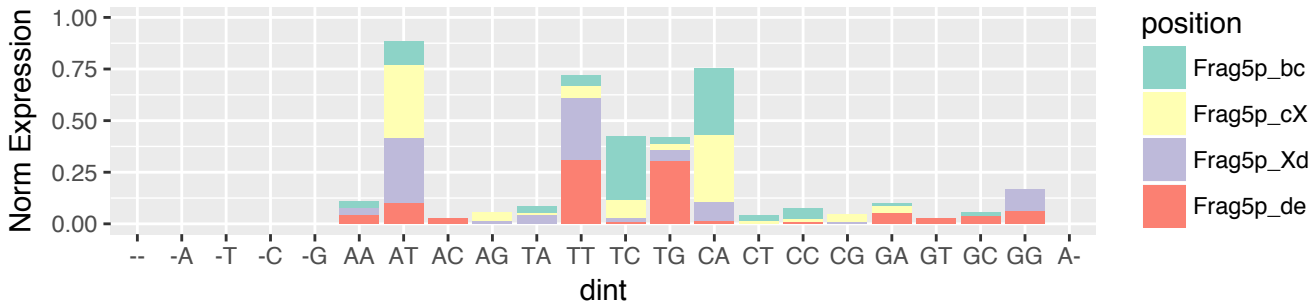

OV (n=871)  
 i-tRF & exclusive (n=194)  
 5' terminus relative to 5' stem of T-loop (n=11)

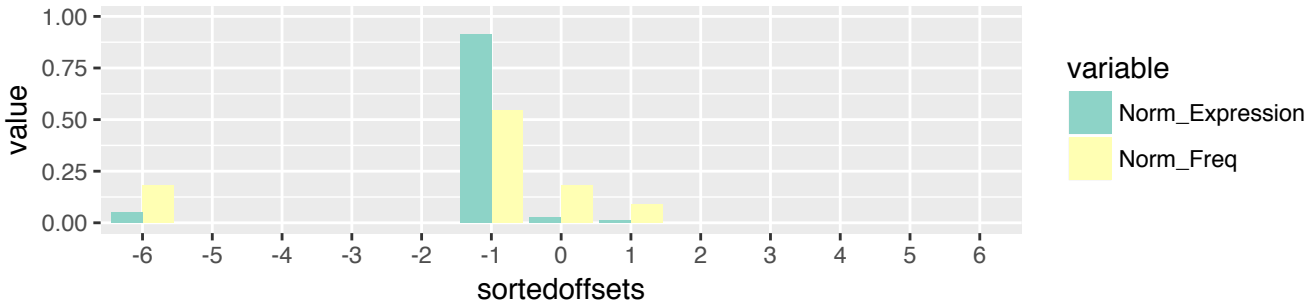

OV (n=871)  
 i-tRF & exclusive (n=194)  
 5' terminus relative to 5' stem of T-loop (n=11)

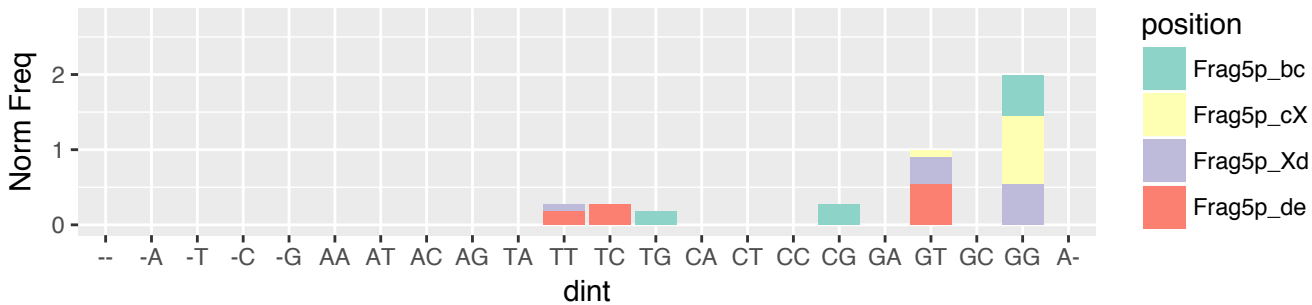

OV (n=871)  
 i-tRF & exclusive (n=194)  
 5' terminus relative to 5' stem of T-loop (n=11)

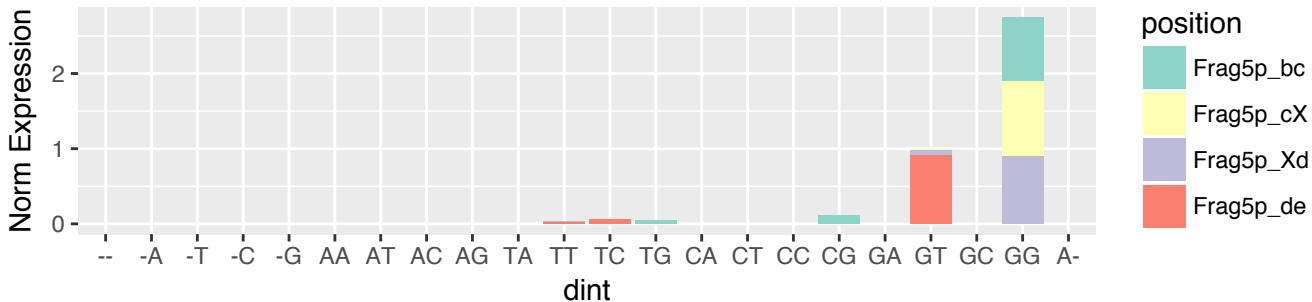

OV (n=871)  
 i-tRF & exclusive (n=194)  
 3' terminus relative to 3' stem of D-loop (n=2)

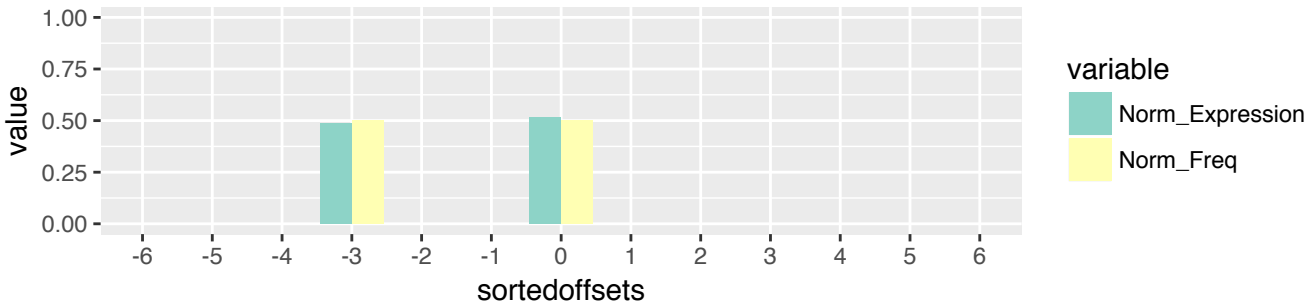

OV (n=871)  
 i-tRF & exclusive (n=194)  
 3' terminus relative to 3' stem of D-loop (n=2)

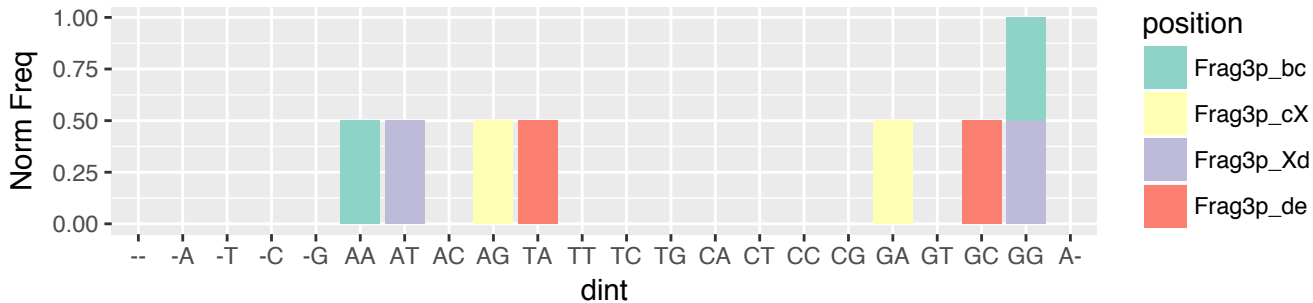

OV (n=871)  
 i-tRF & exclusive (n=194)  
 3' terminus relative to 3' stem of D-loop (n=2)

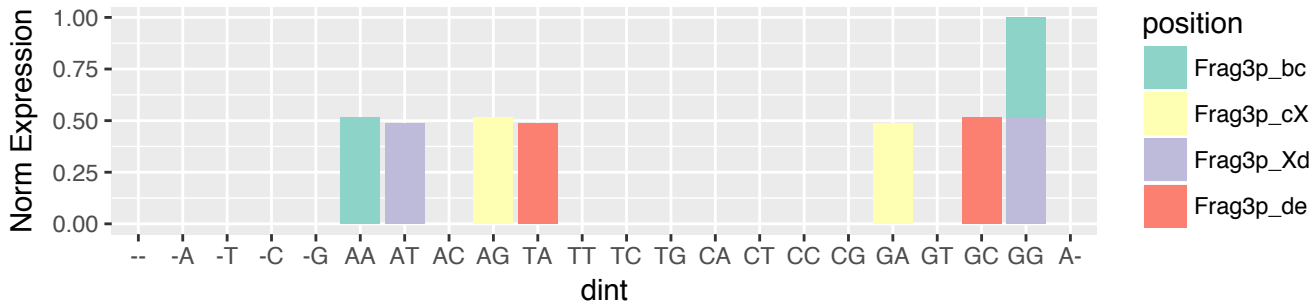

OV (n=871)  
 i-tRF & exclusive (n=194)  
 3' terminus relative to 5' stem of A-loop (n=62)

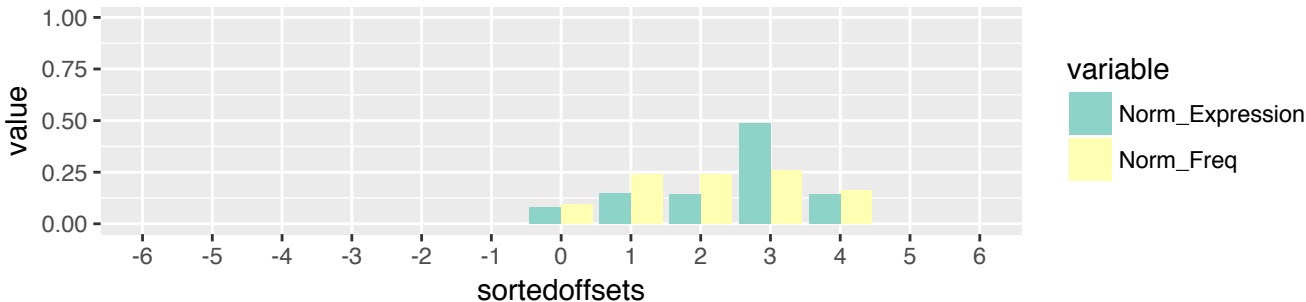

OV (n=871)  
 i-tRF & exclusive (n=194)  
 3' terminus relative to 5' stem of A-loop (n=62)

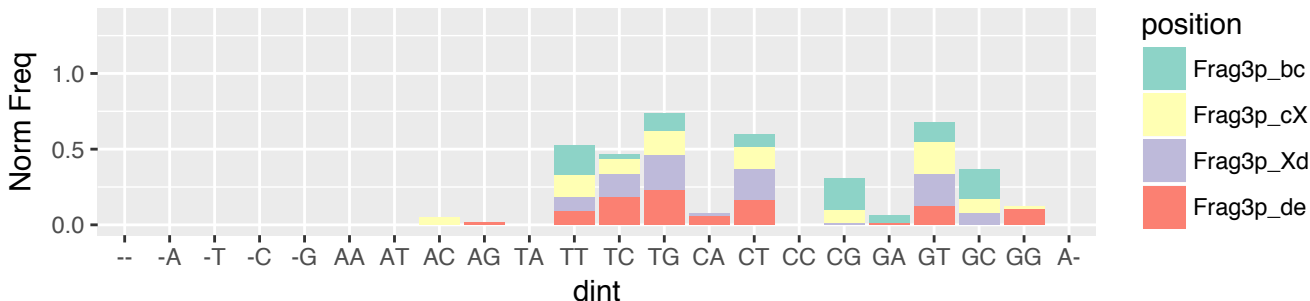

OV (n=871)  
 i-tRF & exclusive (n=194)  
 3' terminus relative to 5' stem of A-loop (n=62)

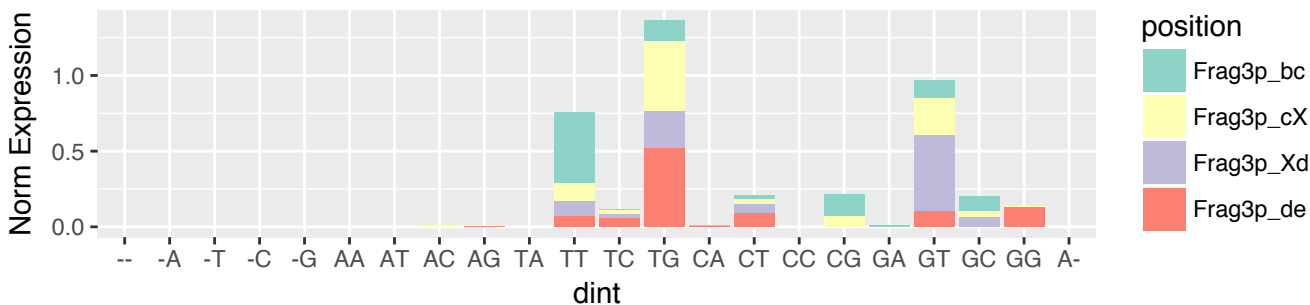

OV (n=871)  
 i-tRF & exclusive (n=194)  
 3' terminus relative to 3' stem of A-loop (n=23)

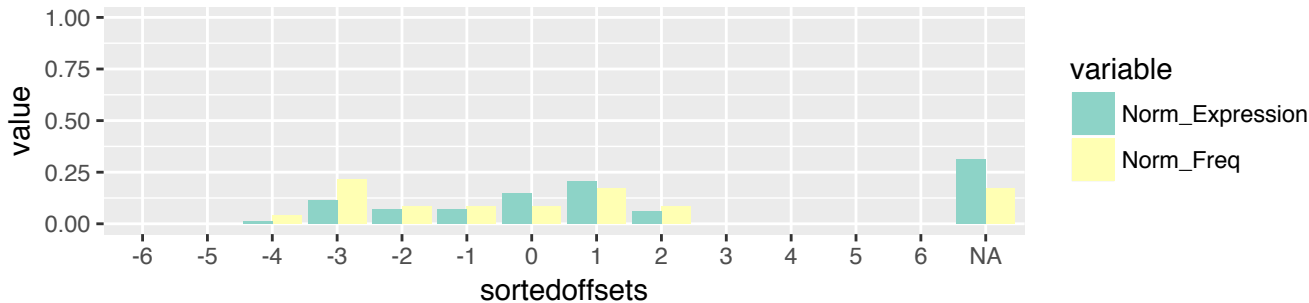

OV (n=871)  
 i-tRF & exclusive (n=194)  
 3' terminus relative to 3' stem of A-loop (n=23)

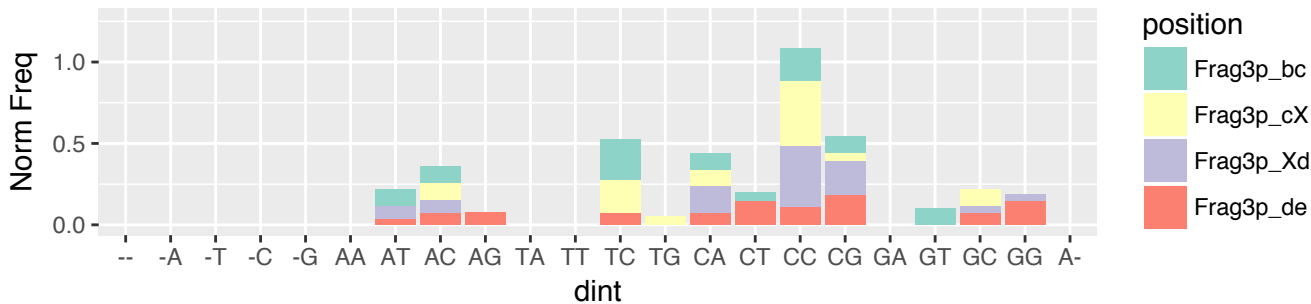

OV (n=871)  
 i-tRF & exclusive (n=194)  
 3' terminus relative to 3' stem of A-loop (n=23)

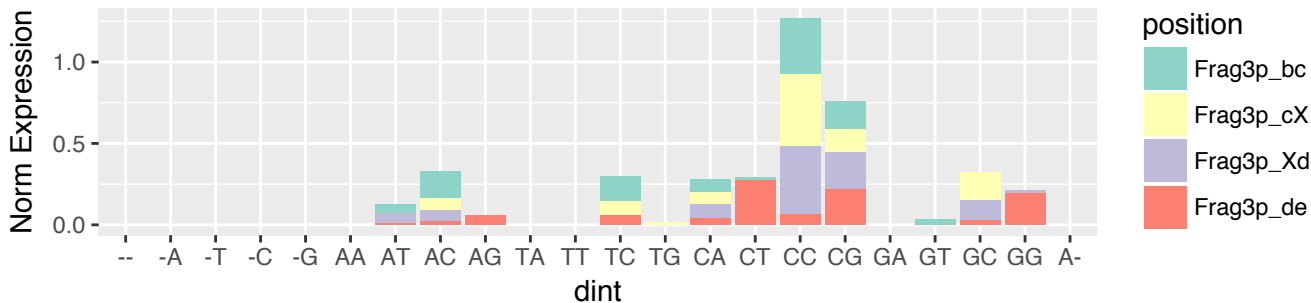



OV (n=871)  
 i-tRF & exclusive (n=194)  
 3' terminus relative to 5' stem of T-loop (n=62)

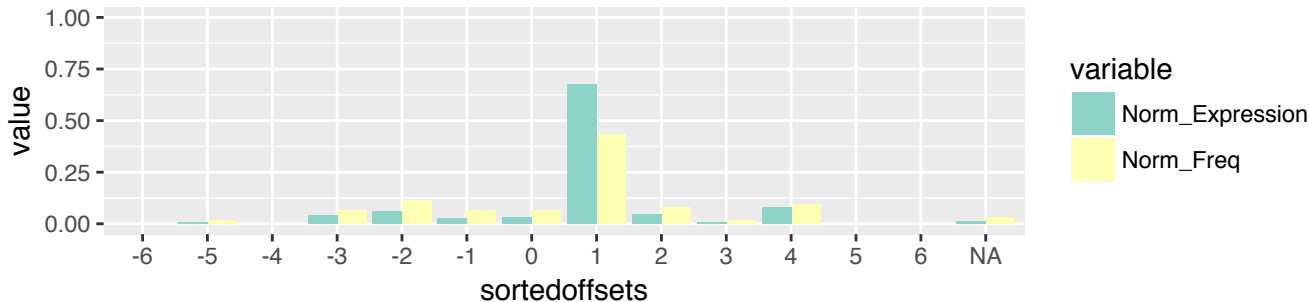

OV (n=871)  
 i-tRF & exclusive (n=194)  
 3' terminus relative to 5' stem of T-loop (n=62)

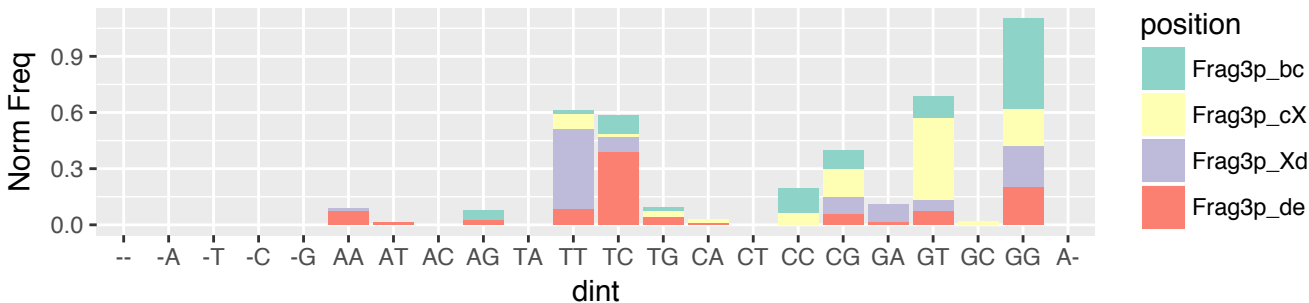

OV (n=871)  
 i-tRF & exclusive (n=194)  
 3' terminus relative to 5' stem of T-loop (n=62)

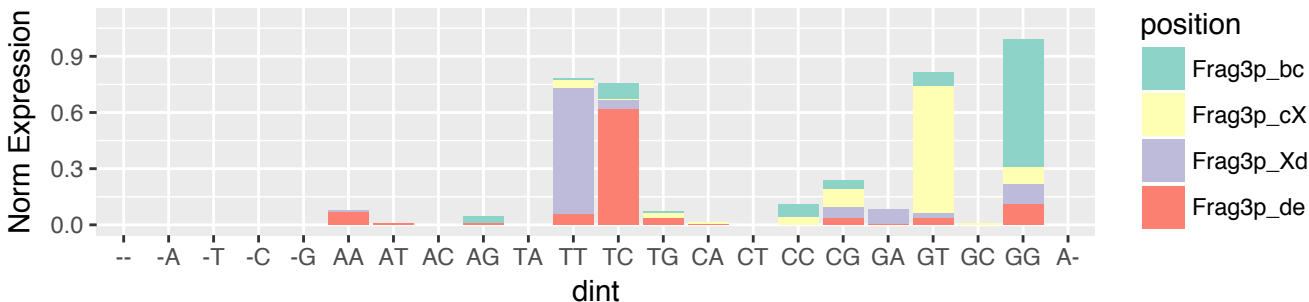

OV (n=871)  
 i-tRF & exclusive (n=194)  
 3' terminus relative to 3' stem of T-loop (n=32)

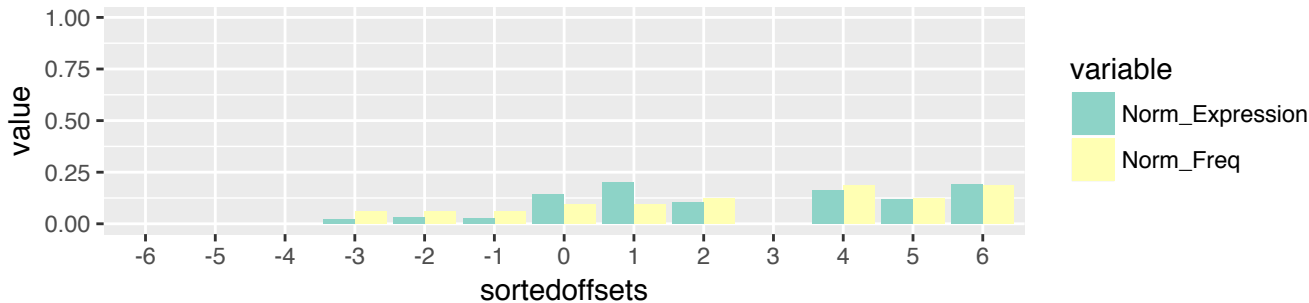

OV (n=871)  
 i-tRF & exclusive (n=194)  
 3' terminus relative to 3' stem of T-loop (n=32)

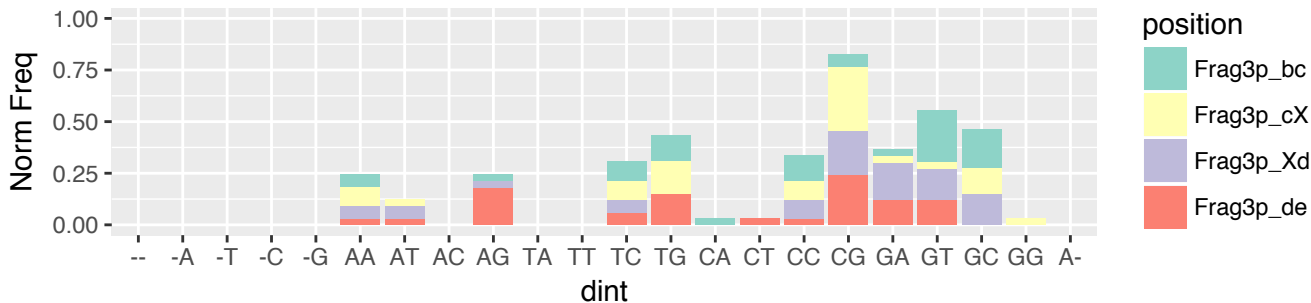

OV (n=871)  
 i-tRF & exclusive (n=194)  
 3' terminus relative to 3' stem of T-loop (n=32)

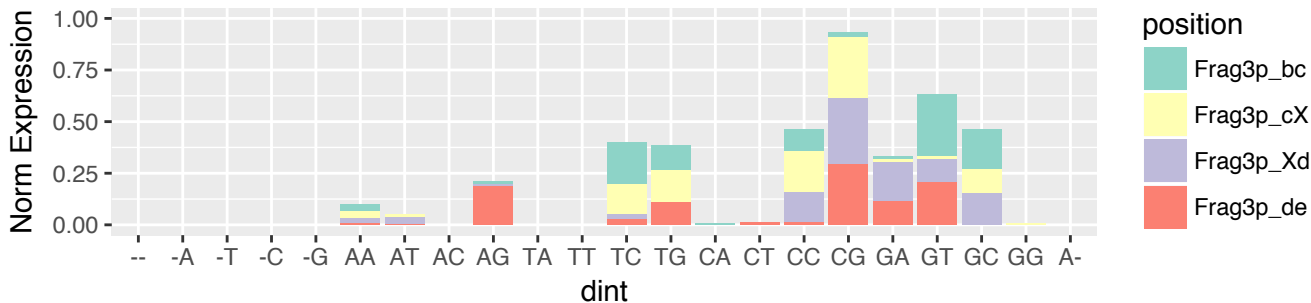

OV (n=871)  
 i-tRF & exclusive (n=194)  
 3' terminus relative to 3' end of the tRNA (n=16)

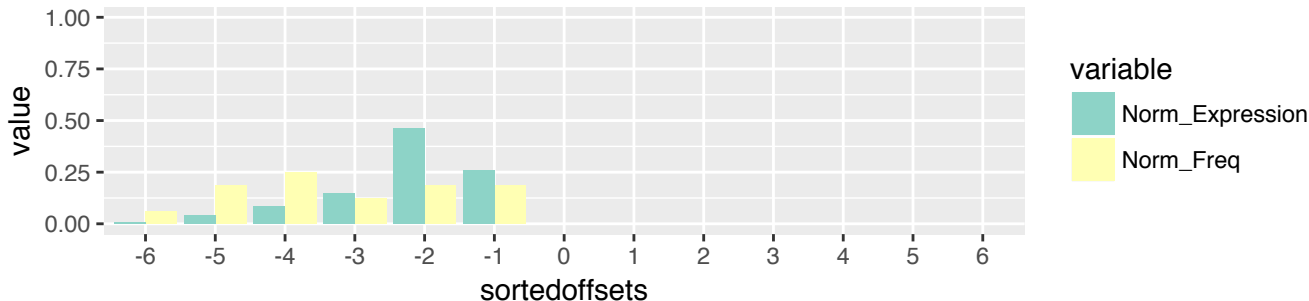

OV (n=871)  
 i-tRF & exclusive (n=194)  
 3' terminus relative to 3' end of the tRNA (n=16)

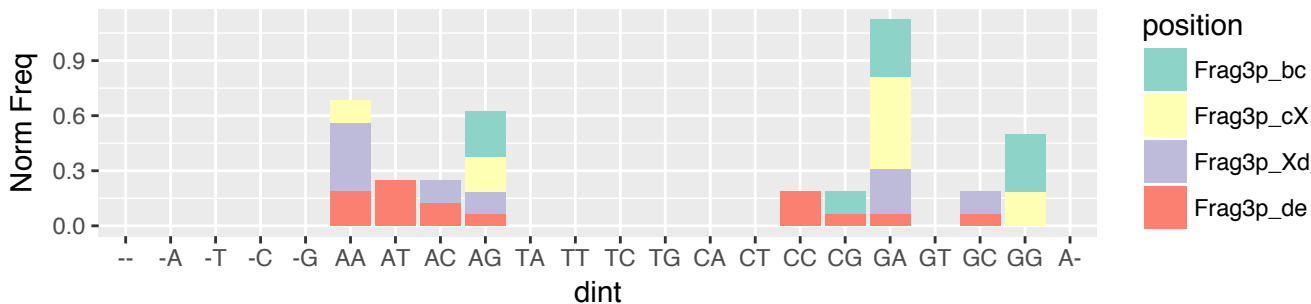

OV (n=871)  
 i-tRF & exclusive (n=194)  
 3' terminus relative to 3' end of the tRNA (n=16)

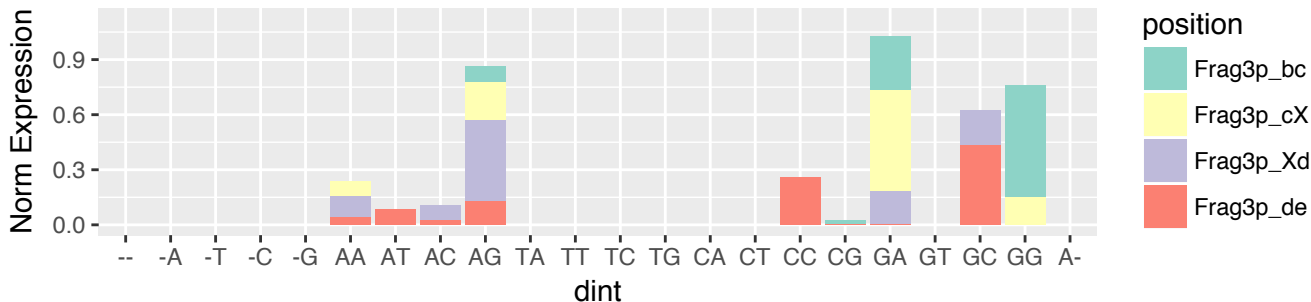

OV (n=871)  
 3'-tRF & exclusive (n=235)  
 5' terminus relative to 5' stem of T-loop (n=141)

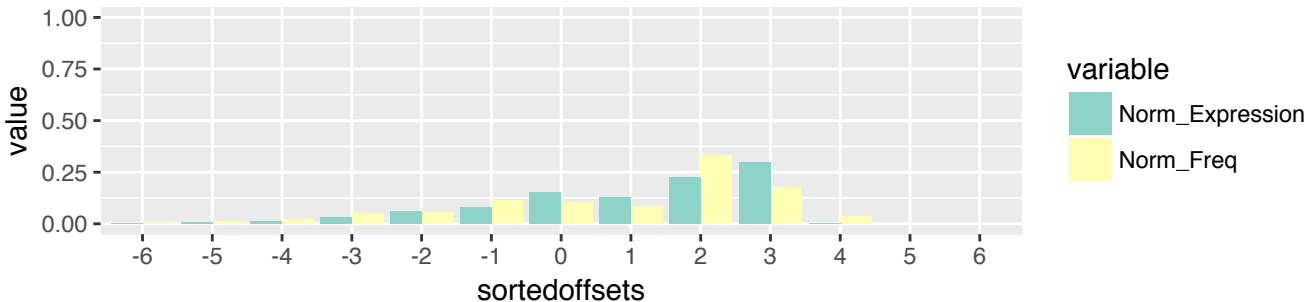

OV (n=871)  
 3'-tRF & exclusive (n=235)  
 5' terminus relative to 5' stem of T-loop (n=141)

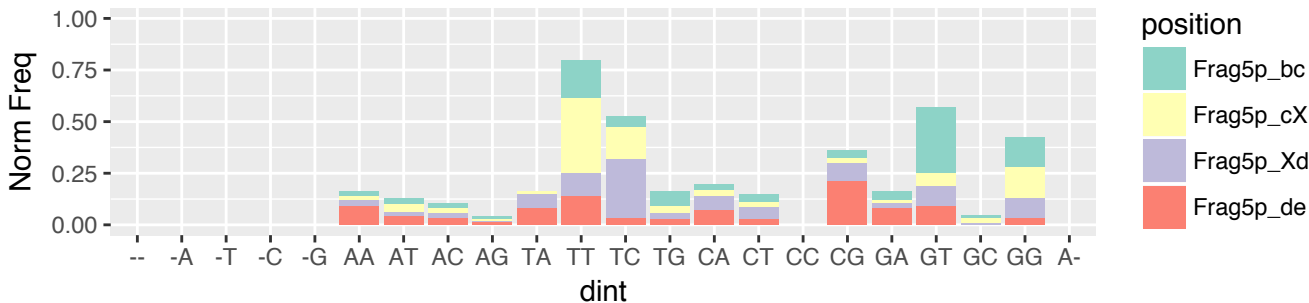

OV (n=871)  
 3'-tRF & exclusive (n=235)  
 5' terminus relative to 5' stem of T-loop (n=141)

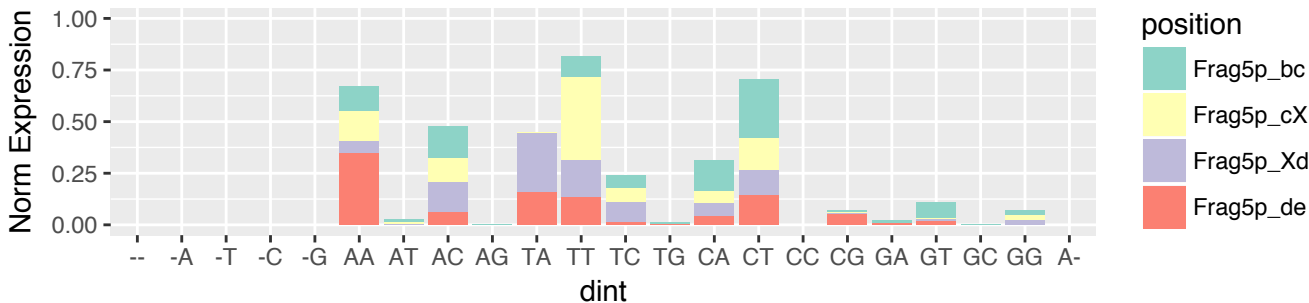

OV (n=871)  
 3'-tRF & exclusive (n=235)  
 5' terminus relative to 3' stem of T-loop (n=95)

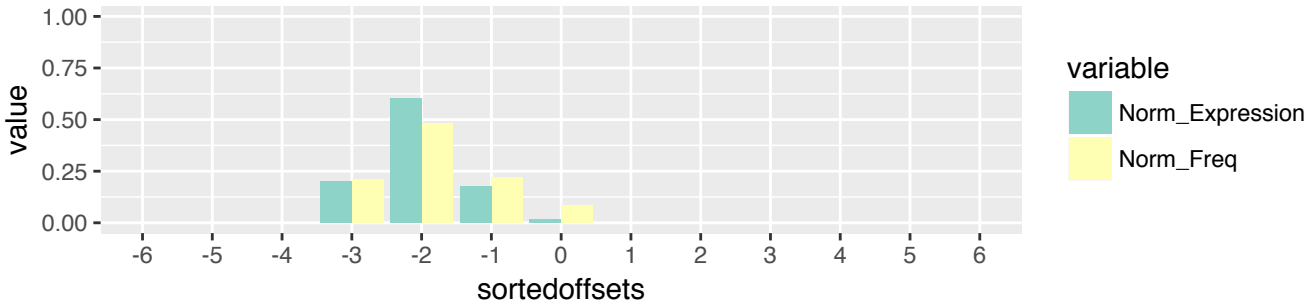

OV (n=871)  
 3'-tRF & exclusive (n=235)  
 5' terminus relative to 3' stem of T-loop (n=95)

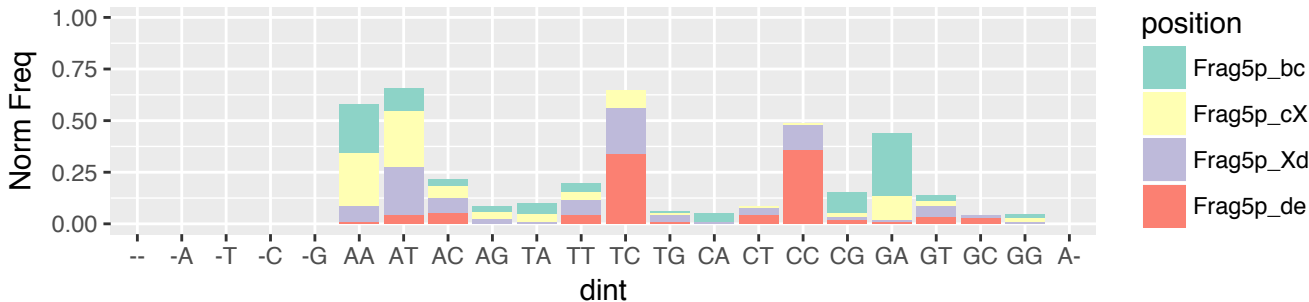

OV (n=871)  
 3'-tRF & exclusive (n=235)  
 5' terminus relative to 3' stem of T-loop (n=95)

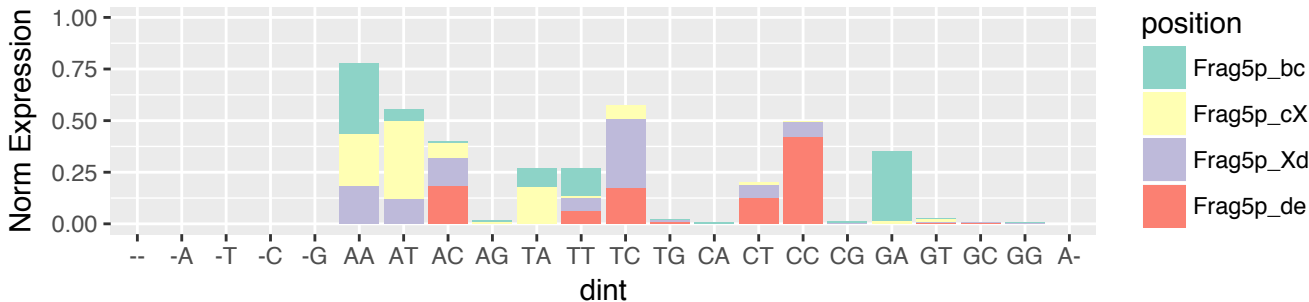

OV (n=871)  
 3'-tRF & exclusive (n=235)  
 3' terminus relative to 3' end of the tRNA (n=235)

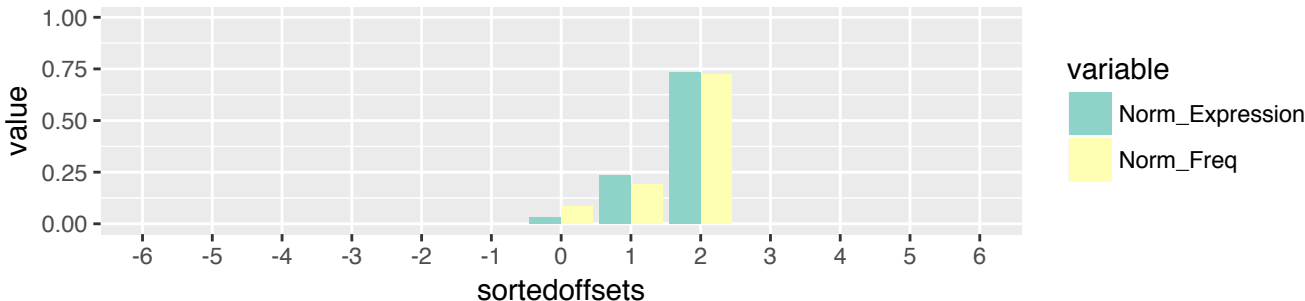

OV (n=871)  
 3'-tRF & exclusive (n=235)  
 3' terminus relative to 3' end of the tRNA (n=235)

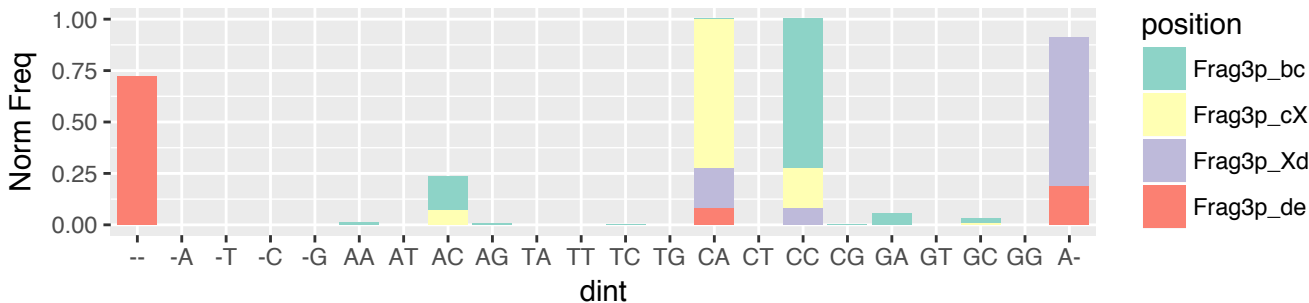

OV (n=871)  
 3'-tRF & exclusive (n=235)  
 3' terminus relative to 3' end of the tRNA (n=235)

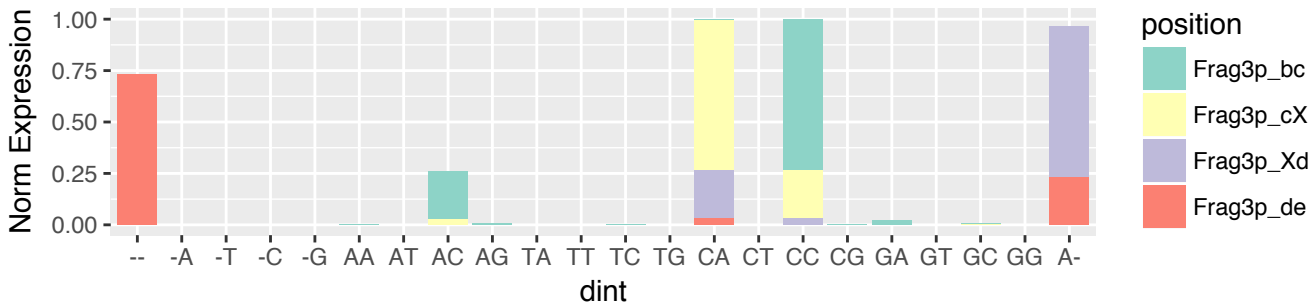

PAAD (n=413)  
 5'-tRF & exclusive (n=81)  
 5' terminus relative to 5' end of the tRNA (n=81)

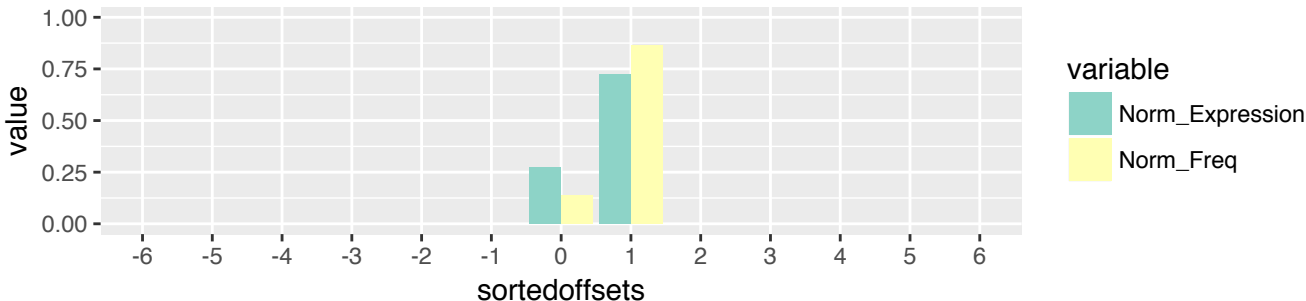

PAAD (n=413)  
 5'-tRF & exclusive (n=81)  
 5' terminus relative to 5' end of the tRNA (n=81)

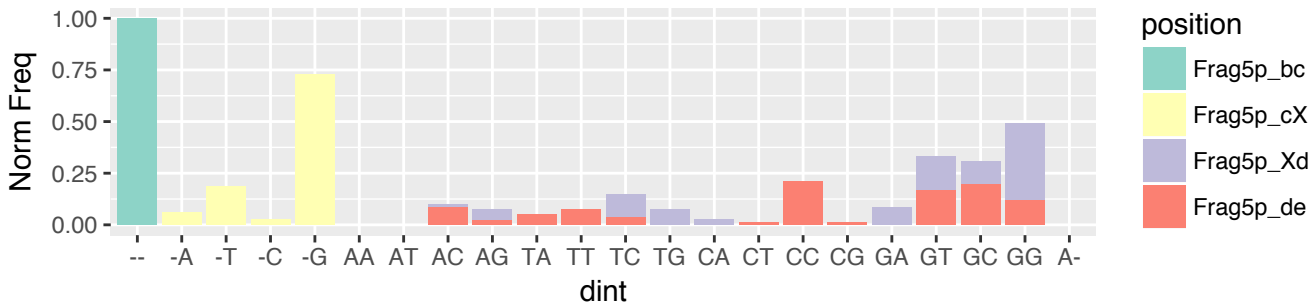

PAAD (n=413)  
 5'-tRF & exclusive (n=81)  
 5' terminus relative to 5' end of the tRNA (n=81)

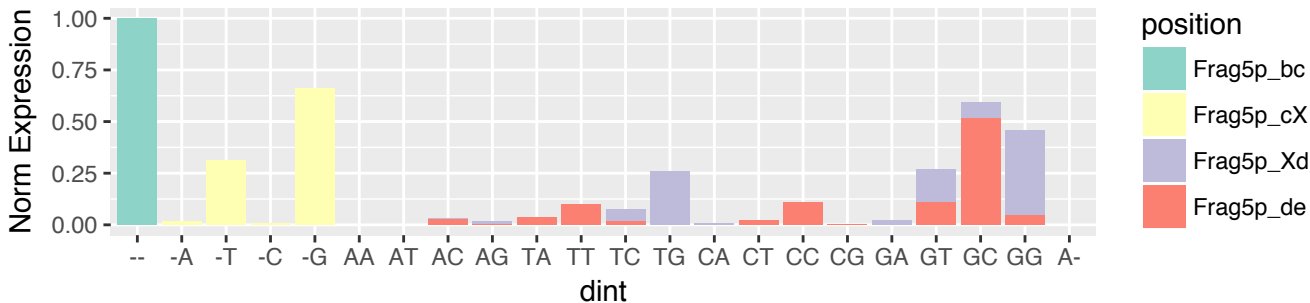

PAAD (n=413)  
 5'-tRF & exclusive (n=81)  
 3' terminus relative to 5' stem of D-loop (n=2)

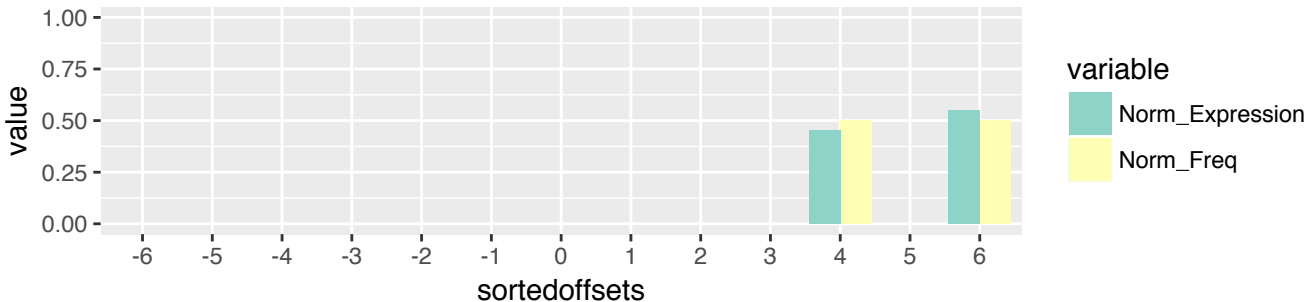

PAAD (n=413)  
 5'-tRF & exclusive (n=81)  
 3' terminus relative to 5' stem of D-loop (n=2)

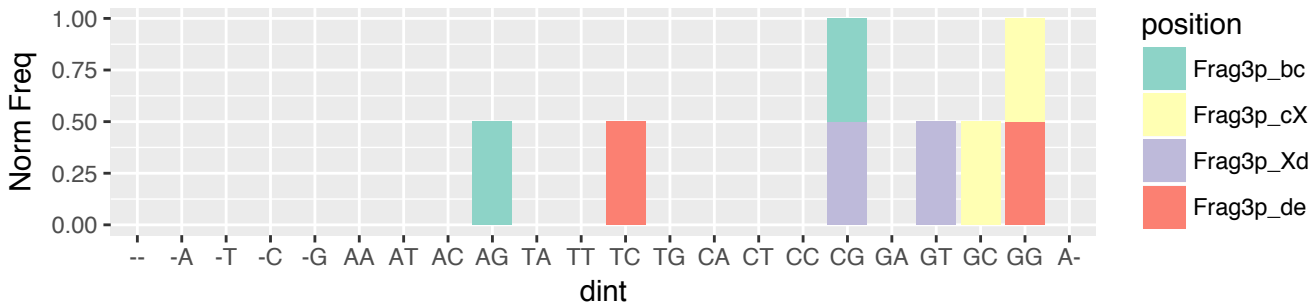

PAAD (n=413)  
 5'-tRF & exclusive (n=81)  
 3' terminus relative to 5' stem of D-loop (n=2)

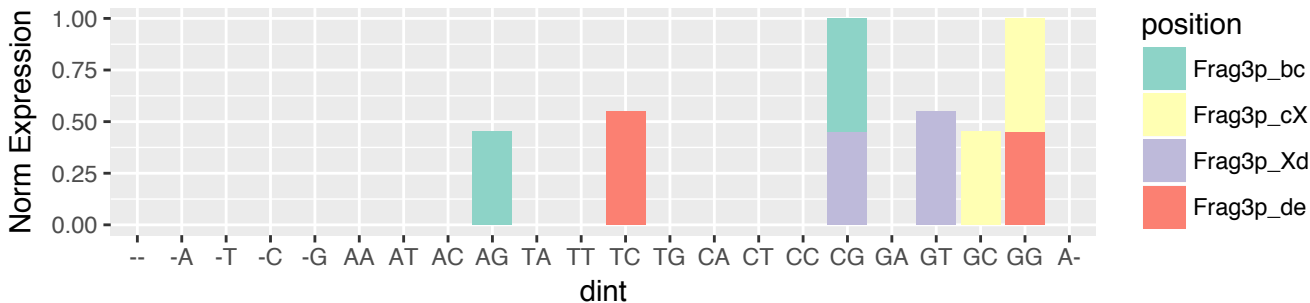



PAAD (n=413)  
 5'-tRF & exclusive (n=81)  
 3' terminus relative to 3' stem of D-loop (n=77)

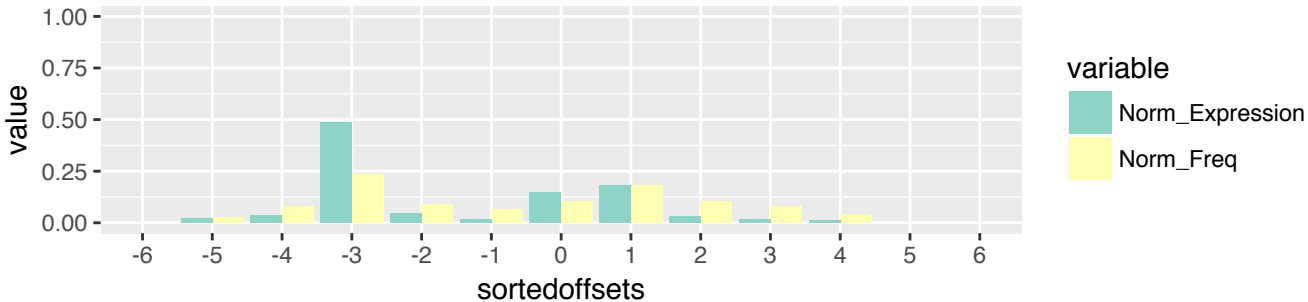

PAAD (n=413)  
 5'-tRF & exclusive (n=81)  
 3' terminus relative to 3' stem of D-loop (n=77)

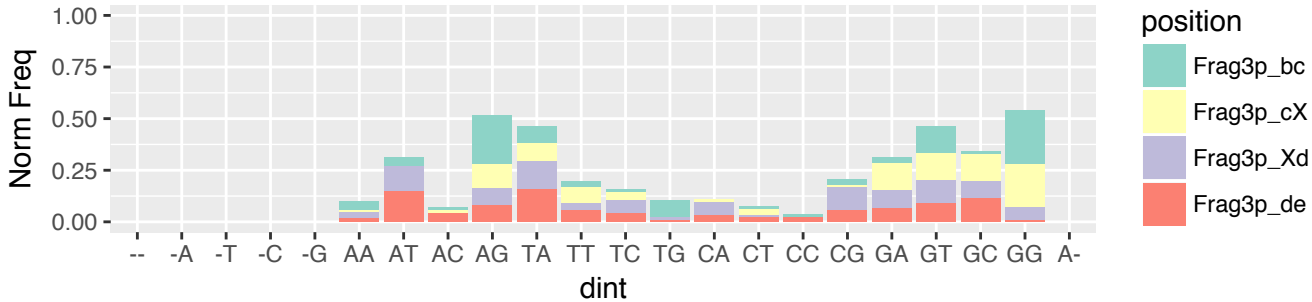

PAAD (n=413)  
 5'-tRF & exclusive (n=81)  
 3' terminus relative to 3' stem of D-loop (n=77)

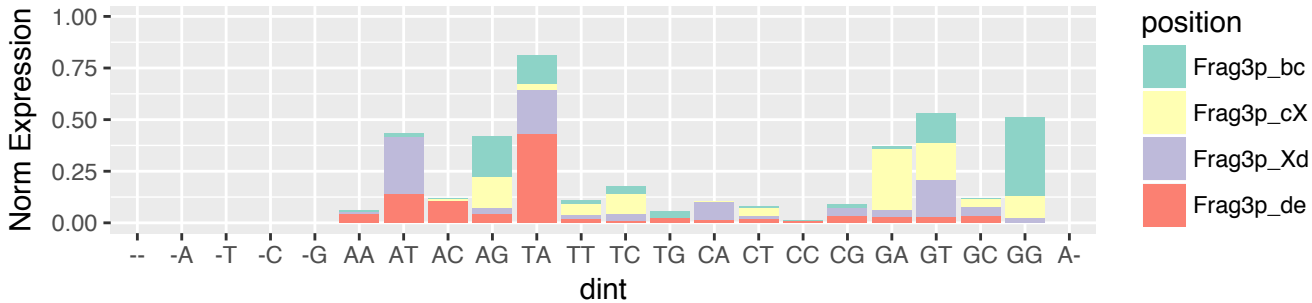

PAAD (n=413)  
 5'-tRF & exclusive (n=81)  
 3' terminus relative to 3' stem of A-loop (n=2)

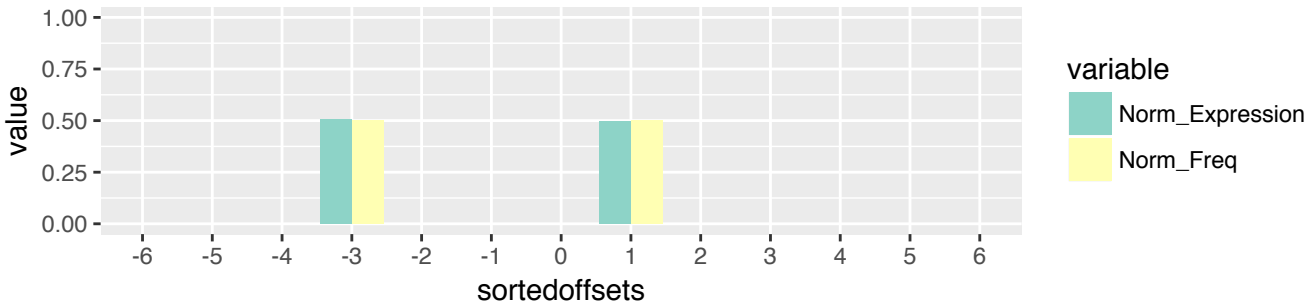

PAAD (n=413)  
 5'-tRF & exclusive (n=81)  
 3' terminus relative to 3' stem of A-loop (n=2)



PAAD (n=413)  
 5'-tRF & exclusive (n=81)  
 3' terminus relative to 3' stem of A-loop (n=2)

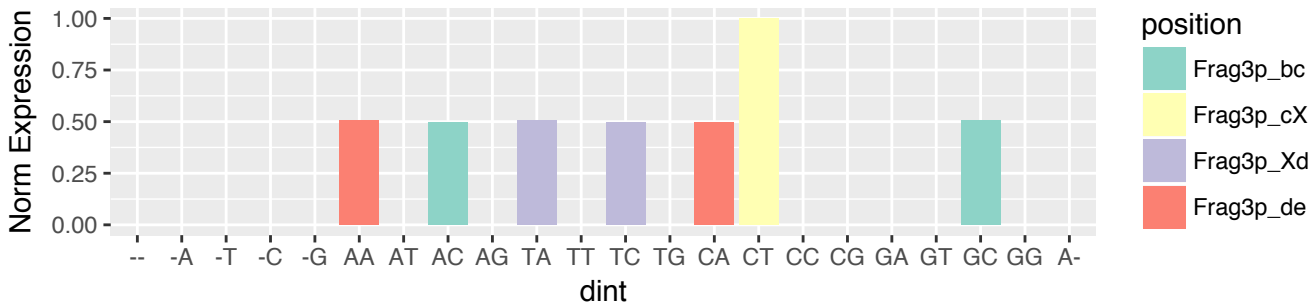

PAAD (n=413)  
i-tRF & exclusive (n=67)  
5' terminus relative to 5' stem of D-loop (n=26)

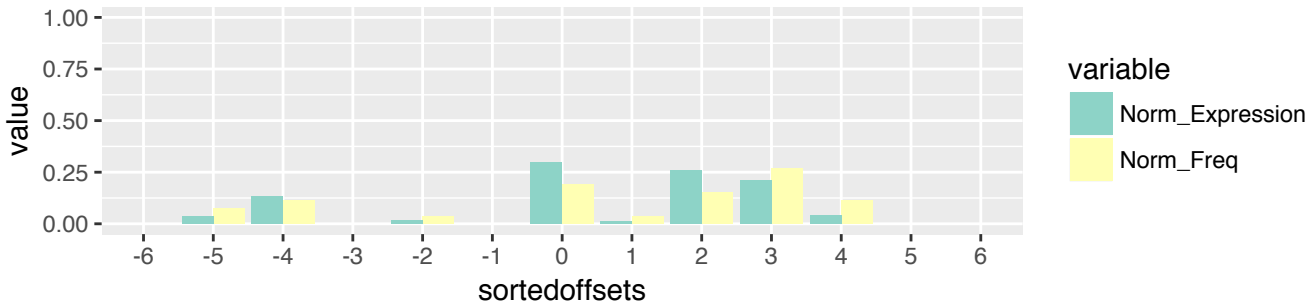

PAAD (n=413)  
i-tRF & exclusive (n=67)  
5' terminus relative to 5' stem of D-loop (n=26)

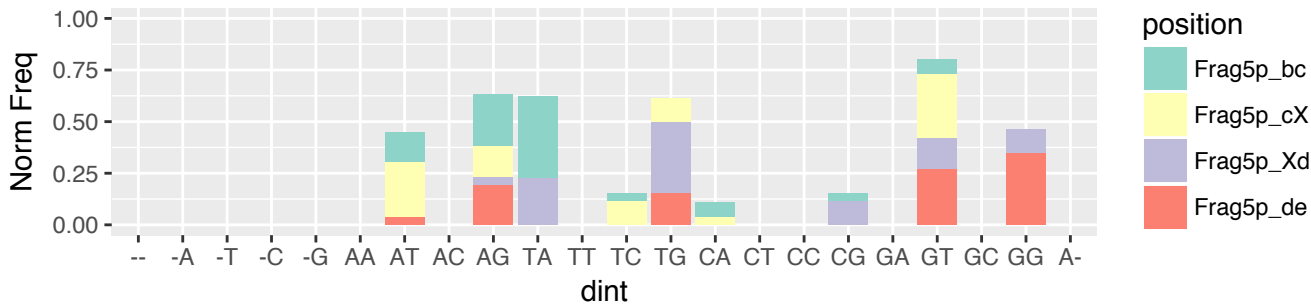

PAAD (n=413)  
i-tRF & exclusive (n=67)  
5' terminus relative to 5' stem of D-loop (n=26)

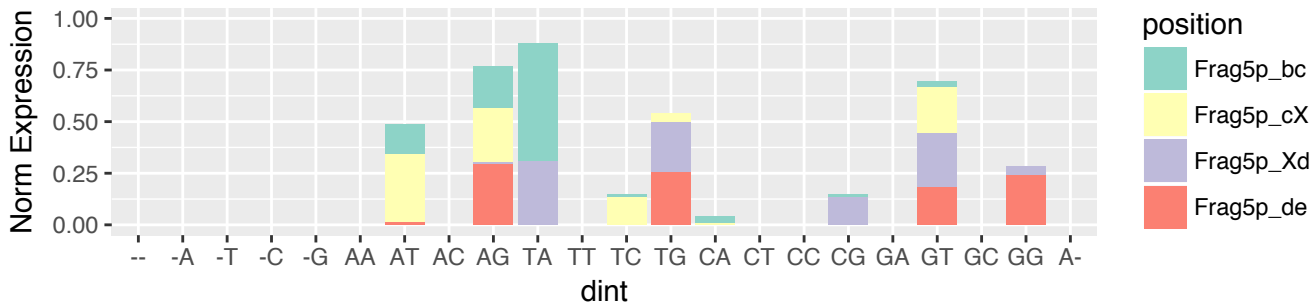

PAAD (n=413)  
i-tRF & exclusive (n=67)  
5' terminus relative to 3' stem of D-loop (n=5)

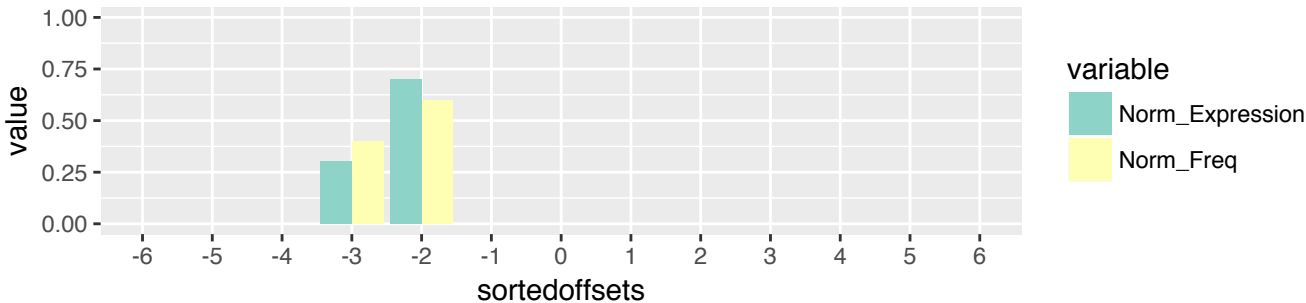

PAAD (n=413)  
i-tRF & exclusive (n=67)  
5' terminus relative to 3' stem of D-loop (n=5)

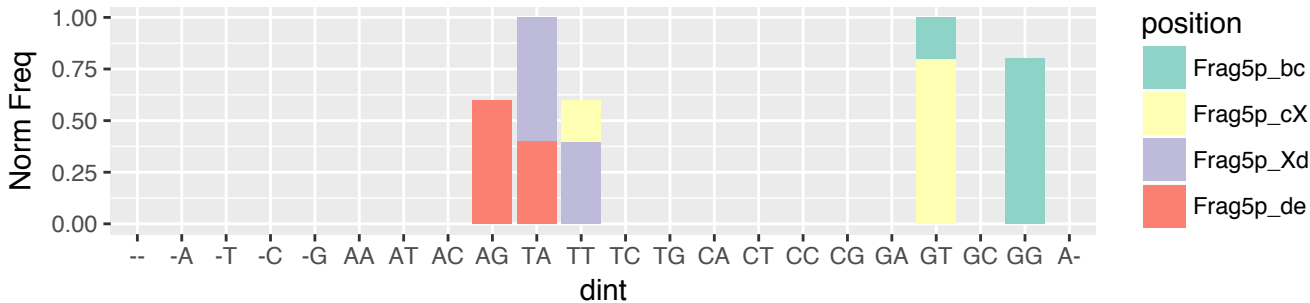

PAAD (n=413)  
i-tRF & exclusive (n=67)  
5' terminus relative to 3' stem of D-loop (n=5)

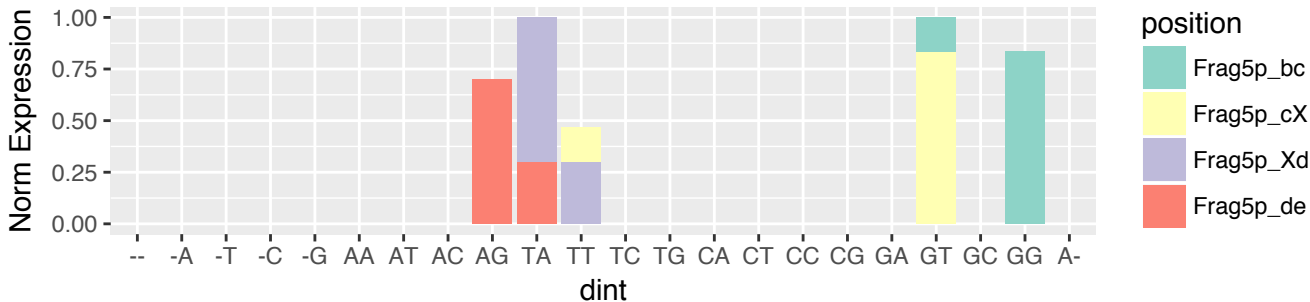

PAAD (n=413)  
 i-tRF & exclusive (n=67)  
 5' terminus relative to 5' stem of A-loop (n=9)

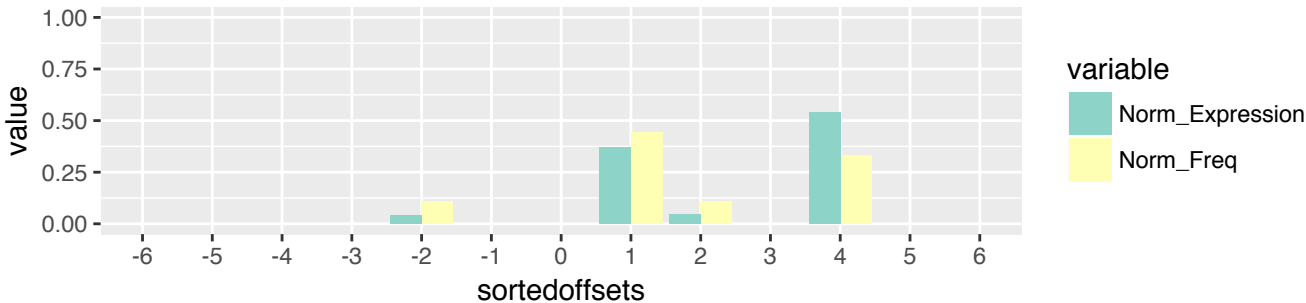

PAAD (n=413)  
 i-tRF & exclusive (n=67)  
 5' terminus relative to 5' stem of A-loop (n=9)

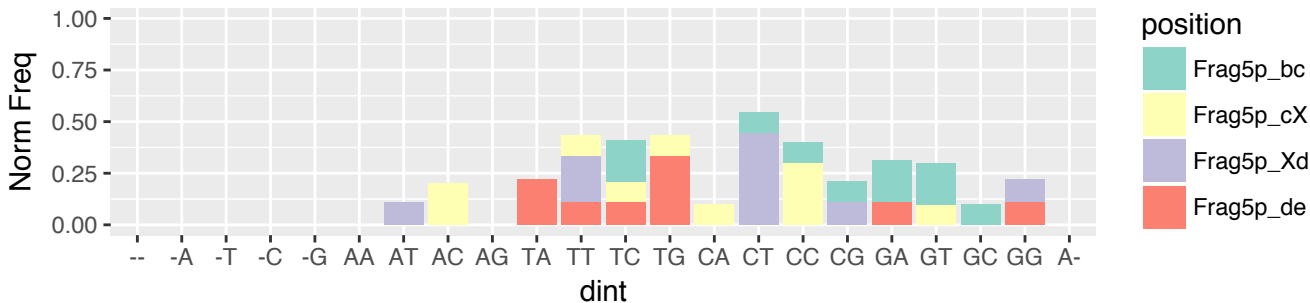

PAAD (n=413)  
 i-tRF & exclusive (n=67)  
 5' terminus relative to 5' stem of A-loop (n=9)

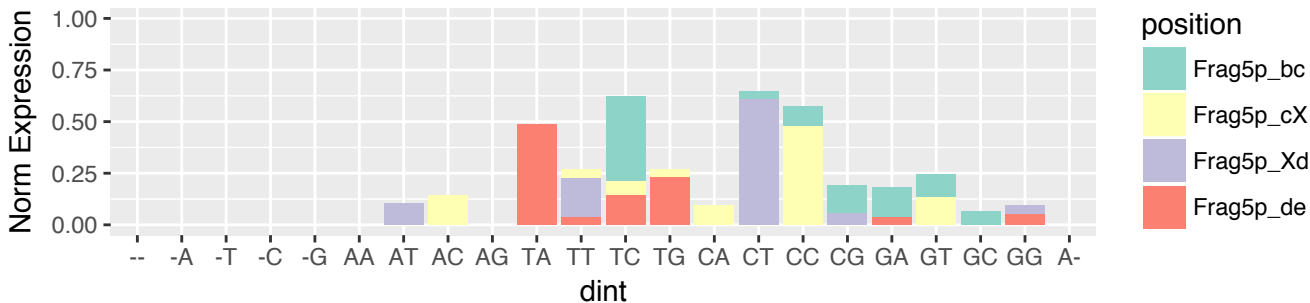

PAAD (n=413)  
 i-tRF & exclusive (n=67)  
 5' terminus relative to 3' stem of A-loop (n=24)

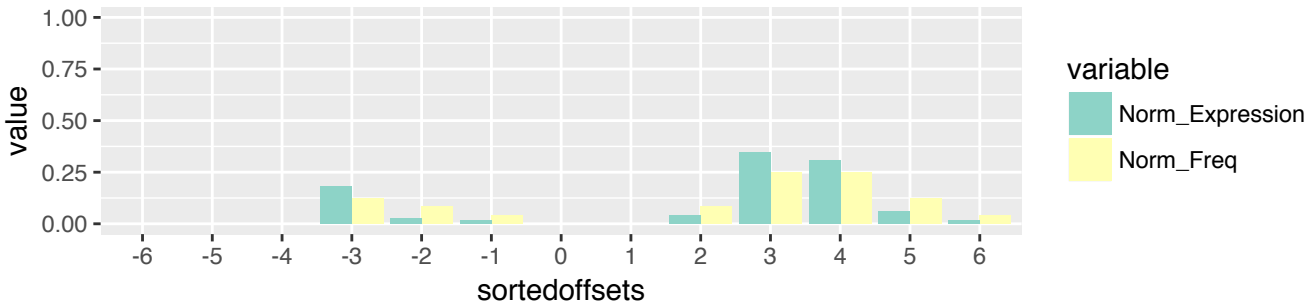

PAAD (n=413)  
 i-tRF & exclusive (n=67)  
 5' terminus relative to 3' stem of A-loop (n=24)

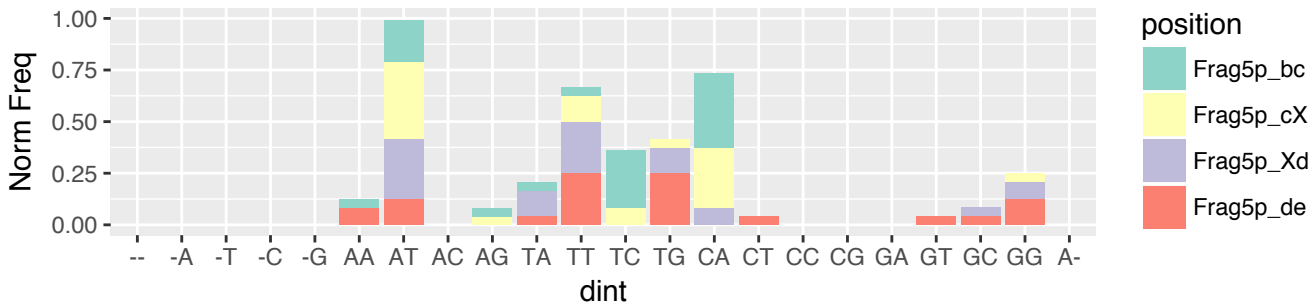

PAAD (n=413)  
 i-tRF & exclusive (n=67)  
 5' terminus relative to 3' stem of A-loop (n=24)

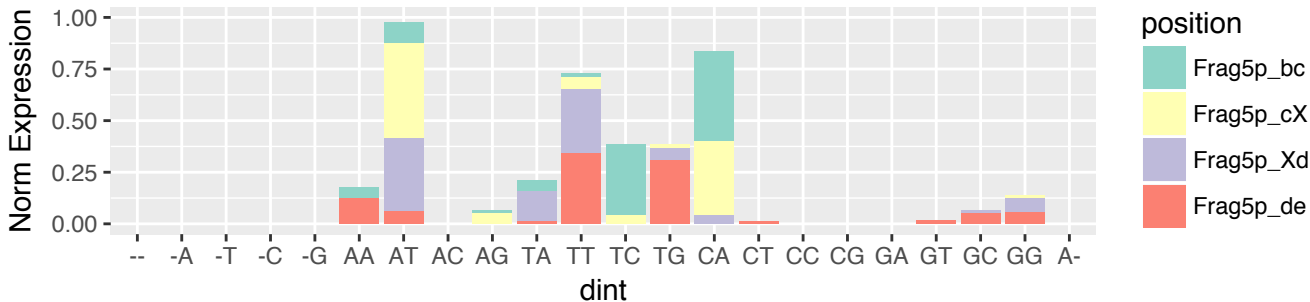

PAAD (n=413)  
i-tRF & exclusive (n=67)  
5' terminus relative to 5' stem of T-loop (n=3)

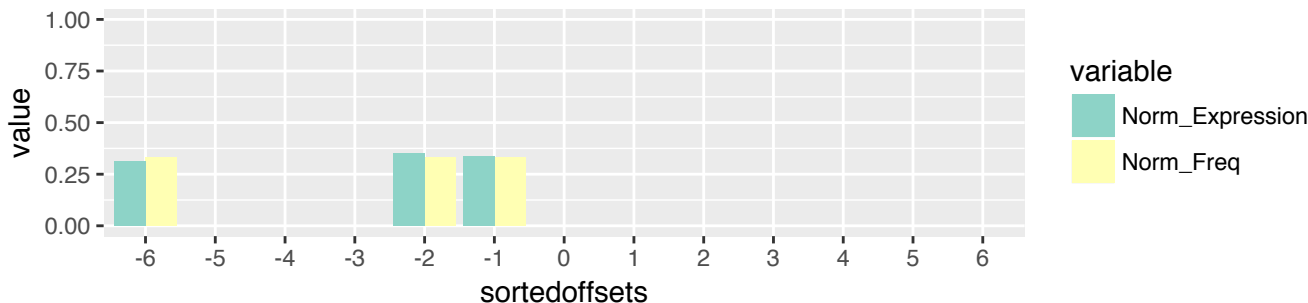

PAAD (n=413)  
i-tRF & exclusive (n=67)  
5' terminus relative to 5' stem of T-loop (n=3)

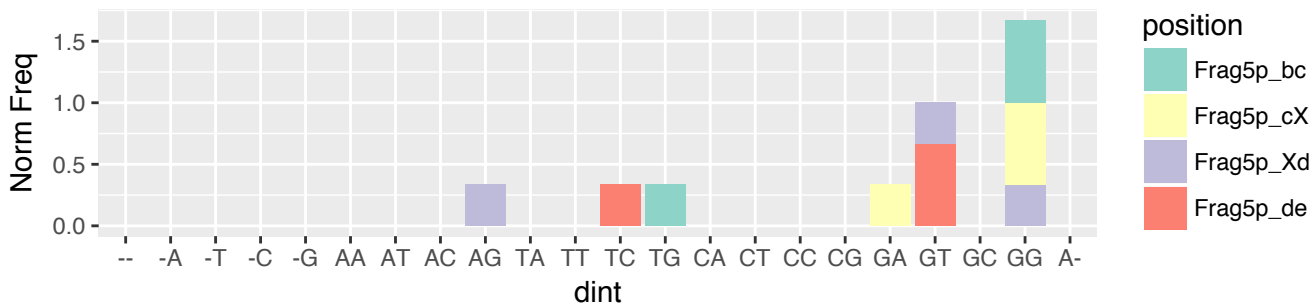

PAAD (n=413)  
i-tRF & exclusive (n=67)  
5' terminus relative to 5' stem of T-loop (n=3)

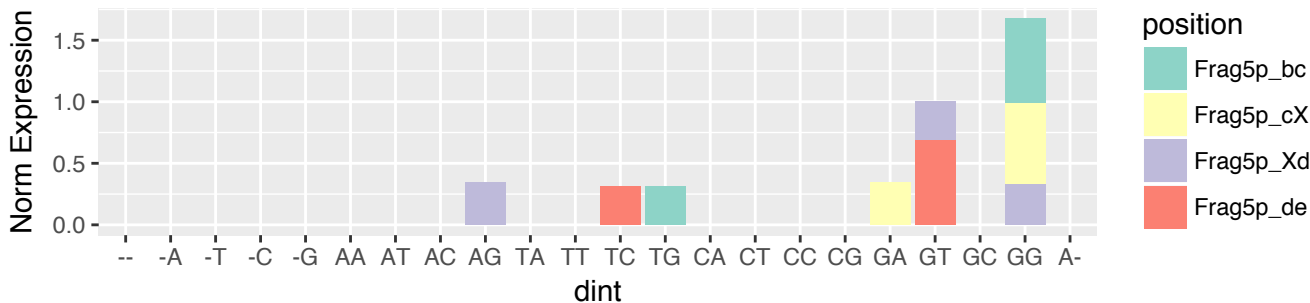

PAAD (n=413)  
i-tRF & exclusive (n=67)  
3' terminus relative to 5' stem of A-loop (n=21)

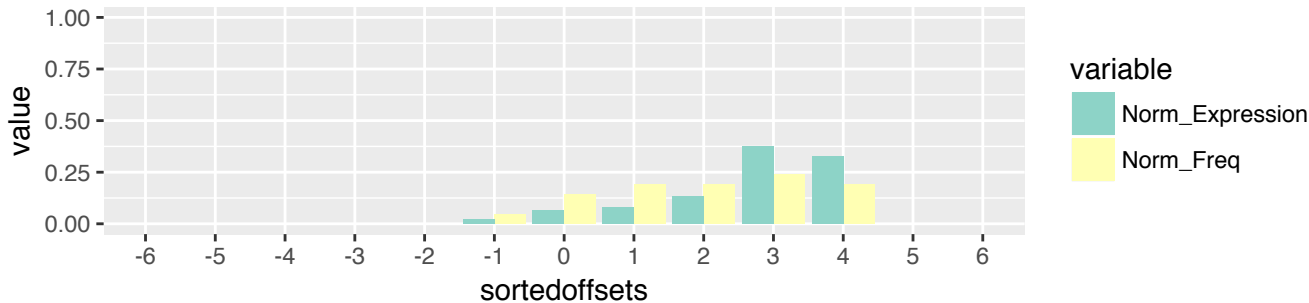

PAAD (n=413)  
i-tRF & exclusive (n=67)  
3' terminus relative to 5' stem of A-loop (n=21)

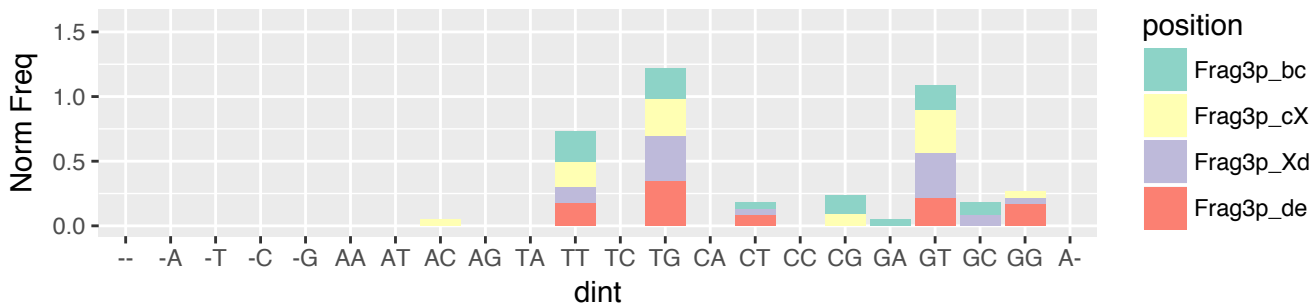

PAAD (n=413)  
i-tRF & exclusive (n=67)  
3' terminus relative to 5' stem of A-loop (n=21)

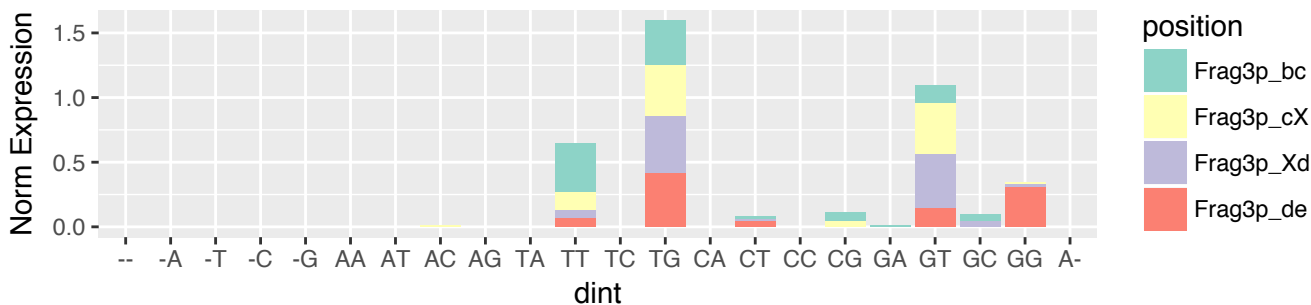



PAAD (n=413)  
 i-tRF & exclusive (n=67)  
 3' terminus relative to 3' stem of A-loop (n=11)

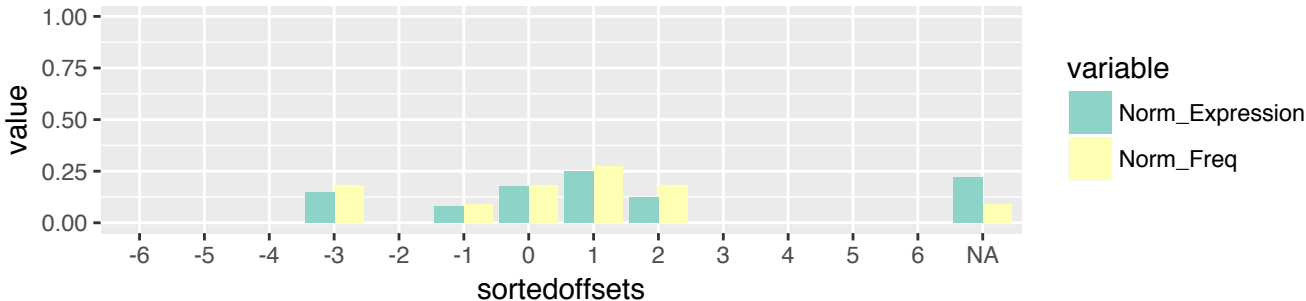

PAAD (n=413)  
 i-tRF & exclusive (n=67)  
 3' terminus relative to 3' stem of A-loop (n=11)

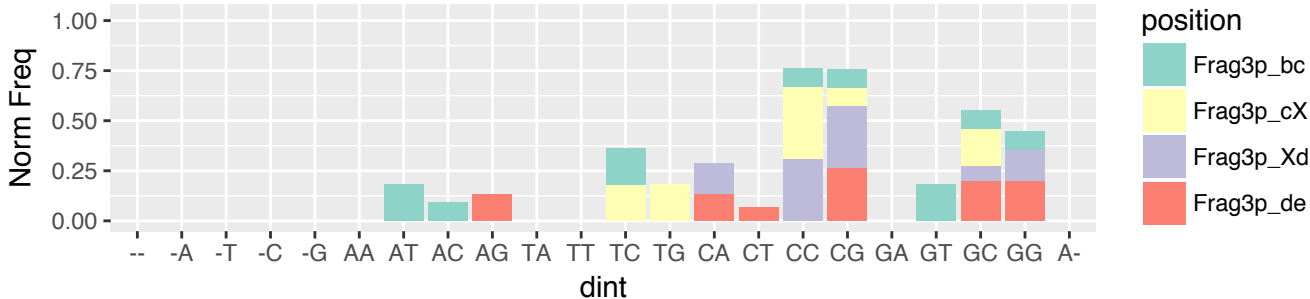

PAAD (n=413)  
 i-tRF & exclusive (n=67)  
 3' terminus relative to 3' stem of A-loop (n=11)

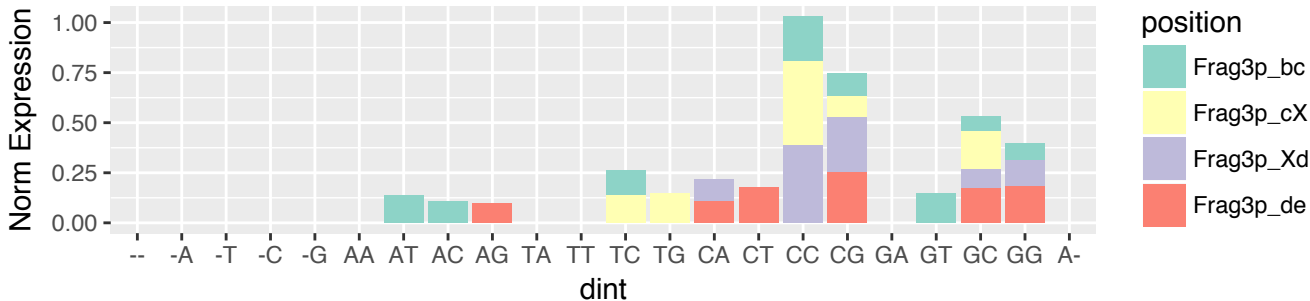

PAAD (n=413)  
 i-tRF & exclusive (n=67)  
 3' terminus relative to 5' stem of T-loop (n=11)

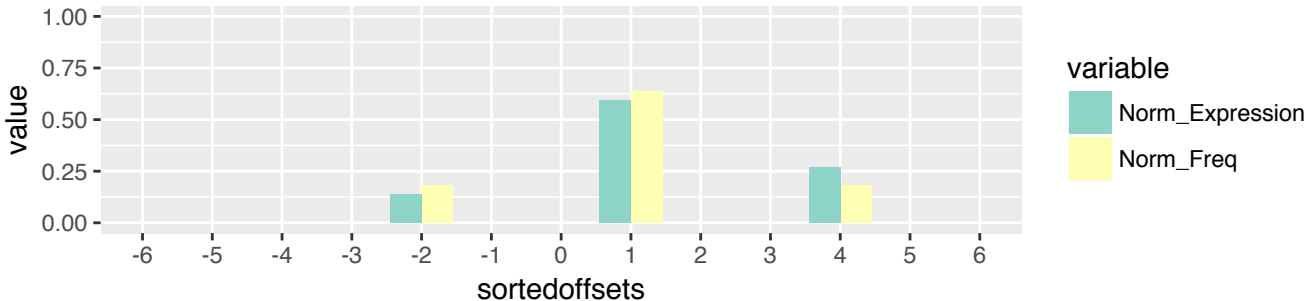

PAAD (n=413)  
 i-tRF & exclusive (n=67)  
 3' terminus relative to 5' stem of T-loop (n=11)

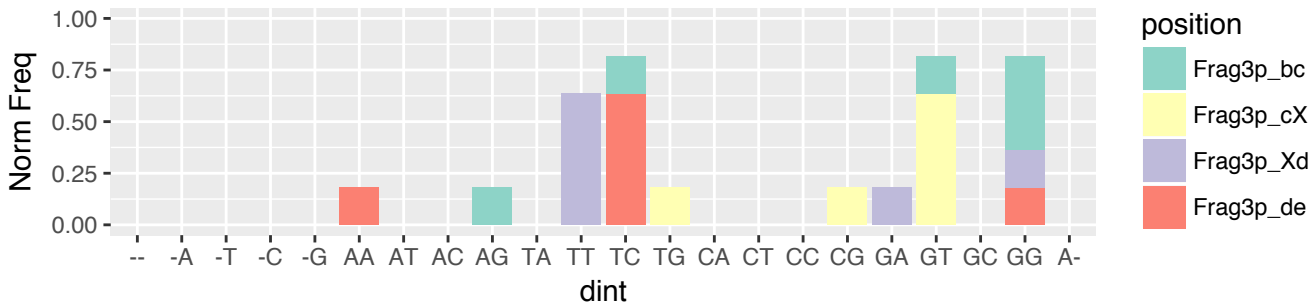

PAAD (n=413)  
 i-tRF & exclusive (n=67)  
 3' terminus relative to 5' stem of T-loop (n=11)

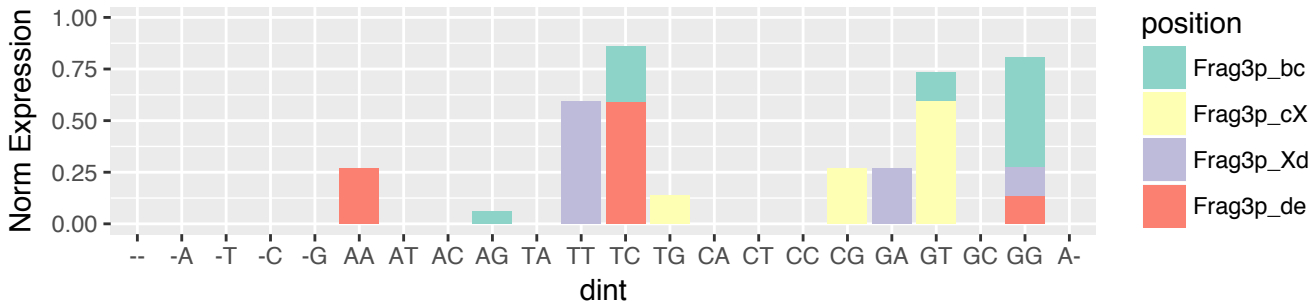

PAAD (n=413)  
 i-tRF & exclusive (n=67)  
 3' terminus relative to 3' stem of T-loop (n=21)

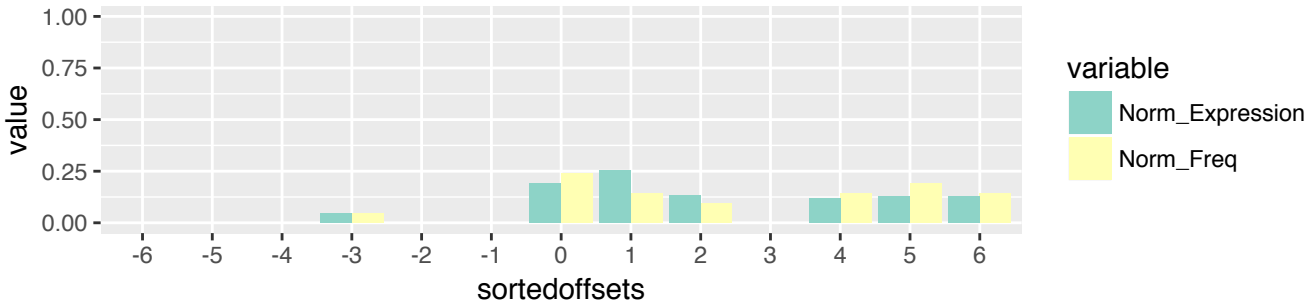

PAAD (n=413)  
 i-tRF & exclusive (n=67)  
 3' terminus relative to 3' stem of T-loop (n=21)

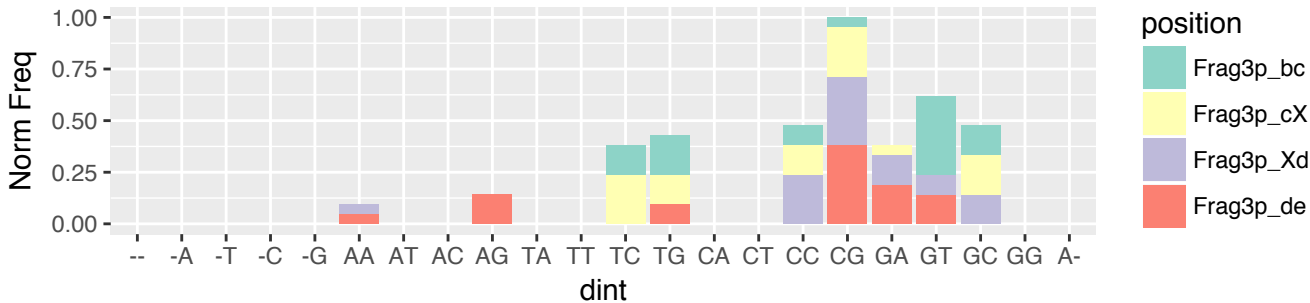

PAAD (n=413)  
 i-tRF & exclusive (n=67)  
 3' terminus relative to 3' stem of T-loop (n=21)

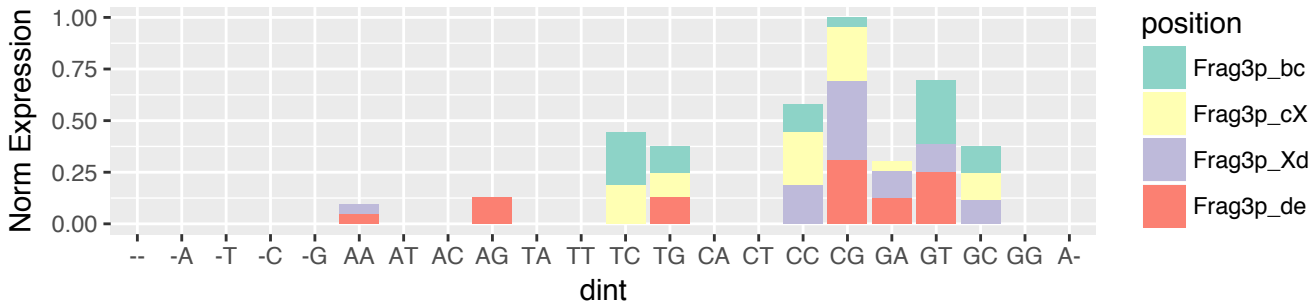

PAAD (n=413)  
 i-tRF & exclusive (n=67)  
 3' terminus relative to 3' end of the tRNA (n=3)

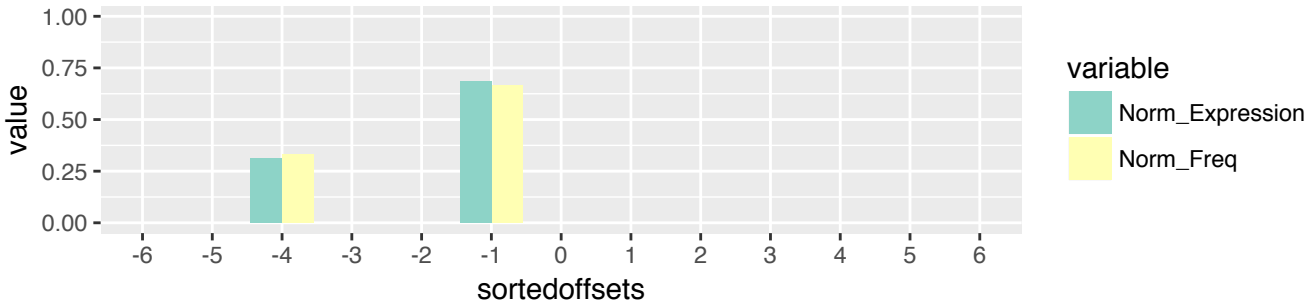

PAAD (n=413)  
 i-tRF & exclusive (n=67)  
 3' terminus relative to 3' end of the tRNA (n=3)

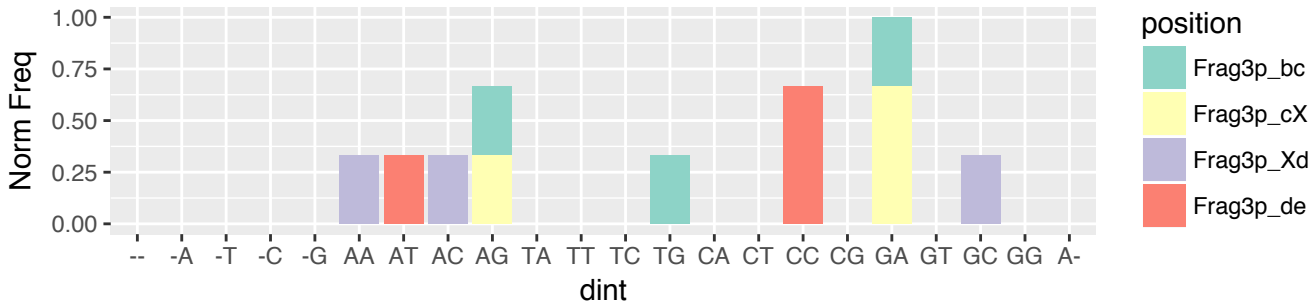

PAAD (n=413)  
 i-tRF & exclusive (n=67)  
 3' terminus relative to 3' end of the tRNA (n=3)

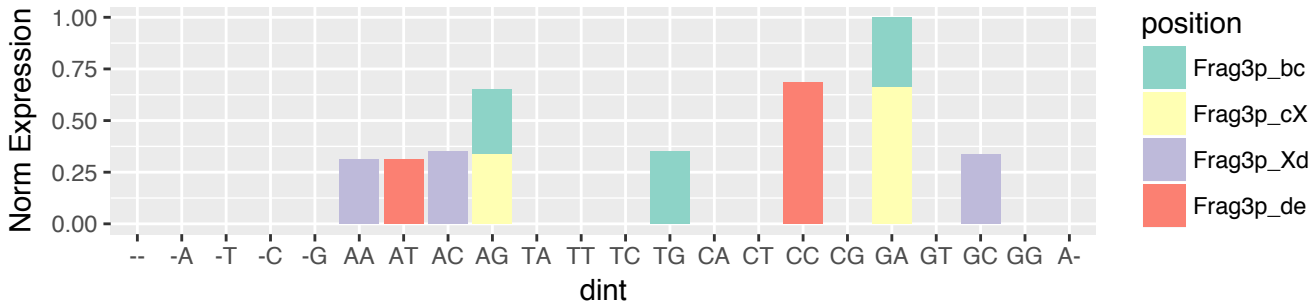

PAAD (n=413)  
 3'-tRF & exclusive (n=88)  
 5' terminus relative to 5' stem of T-loop (n=61)

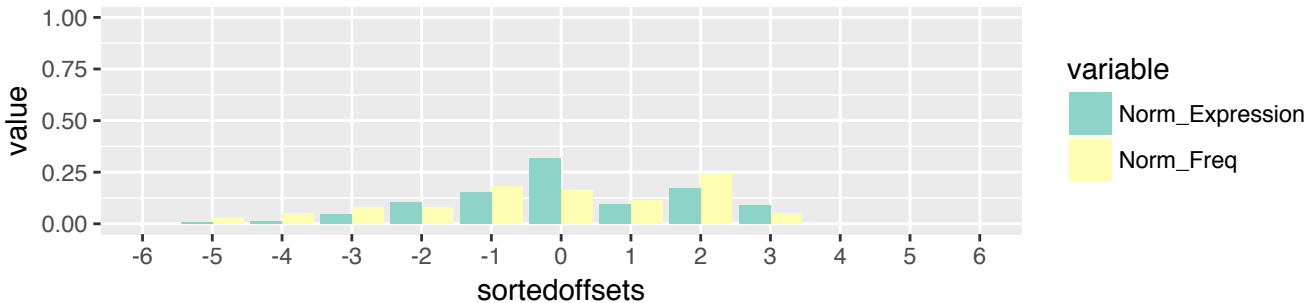

PAAD (n=413)  
 3'-tRF & exclusive (n=88)  
 5' terminus relative to 5' stem of T-loop (n=61)

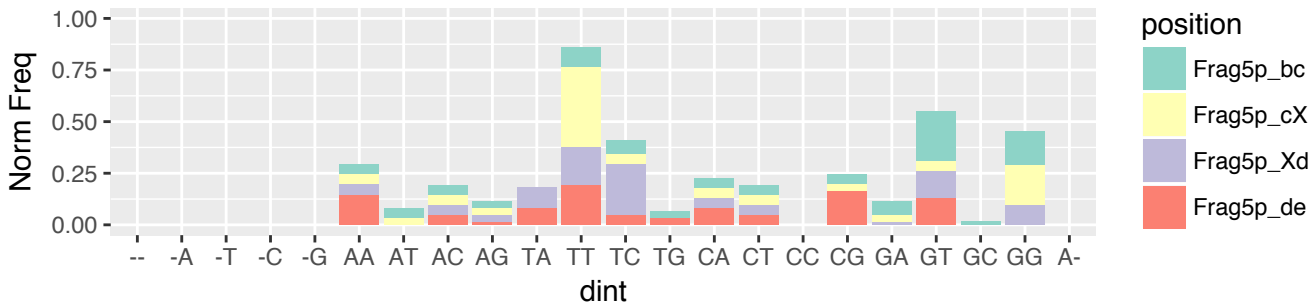

PAAD (n=413)  
 3'-tRF & exclusive (n=88)  
 5' terminus relative to 5' stem of T-loop (n=61)

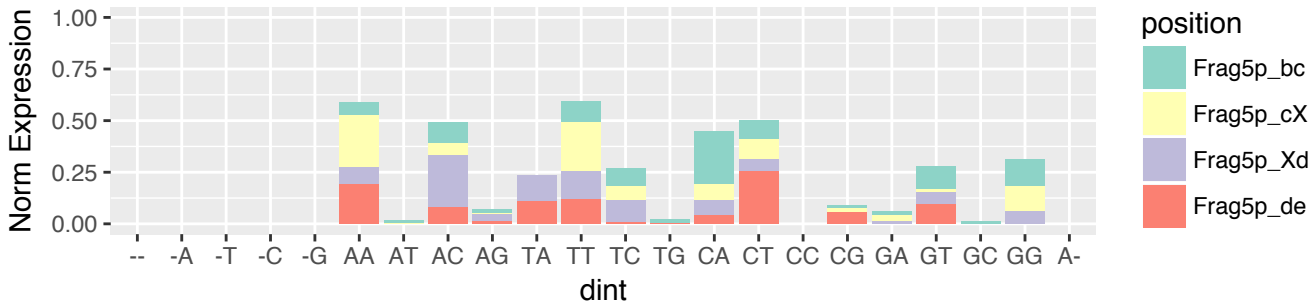

PAAD (n=413)  
 3'-tRF & exclusive (n=88)  
 5' terminus relative to 3' stem of T-loop (n=27)

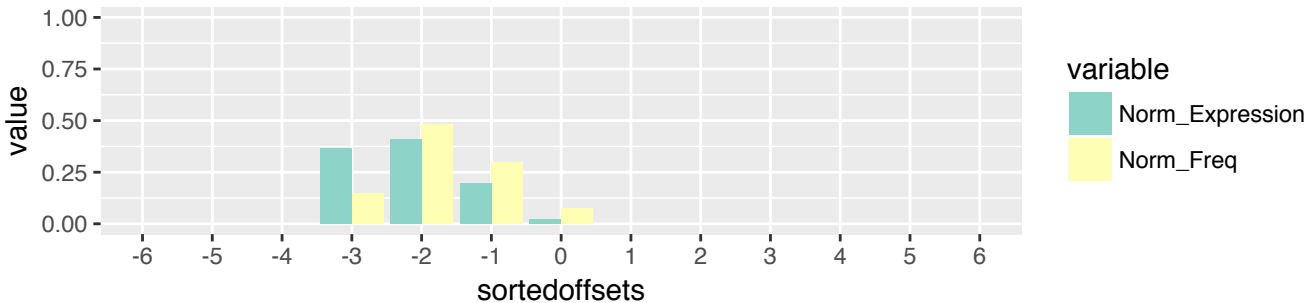

PAAD (n=413)  
 3'-tRF & exclusive (n=88)  
 5' terminus relative to 3' stem of T-loop (n=27)

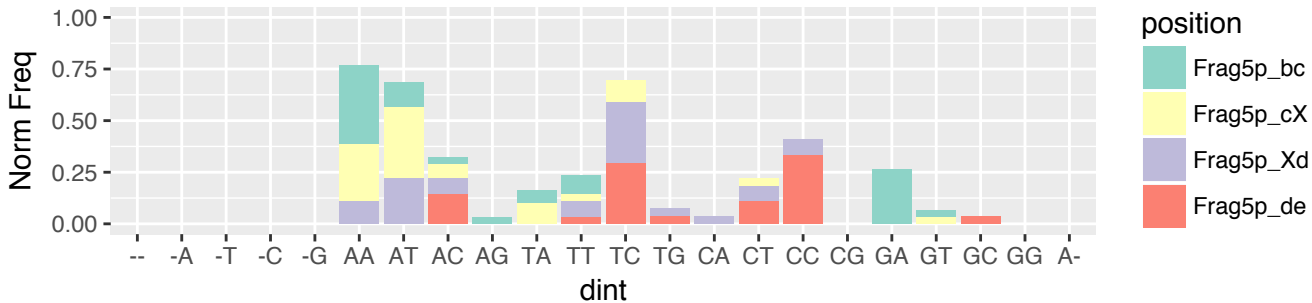

PAAD (n=413)  
 3'-tRF & exclusive (n=88)  
 5' terminus relative to 3' stem of T-loop (n=27)

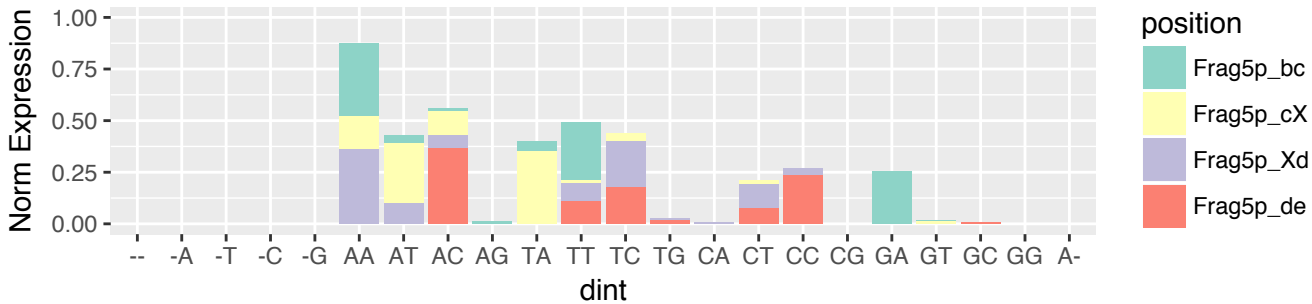

PAAD (n=413)  
 3'-tRF & exclusive (n=88)  
 3' terminus relative to 3' end of the tRNA (n=88)

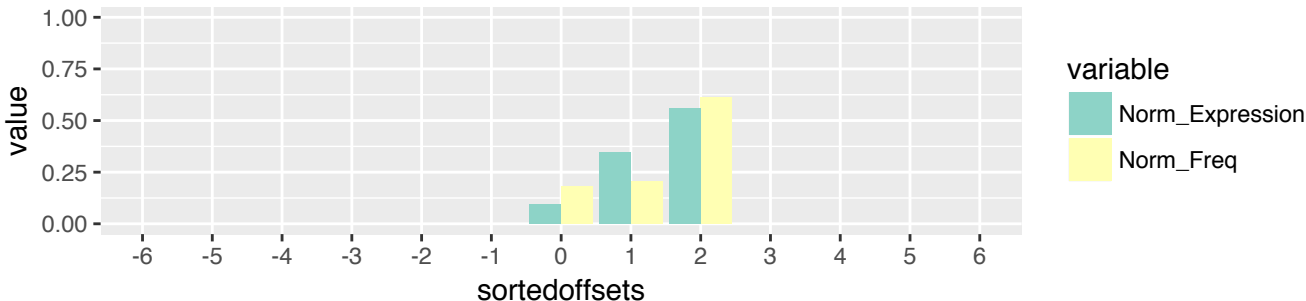

PAAD (n=413)  
 3'-tRF & exclusive (n=88)  
 3' terminus relative to 3' end of the tRNA (n=88)

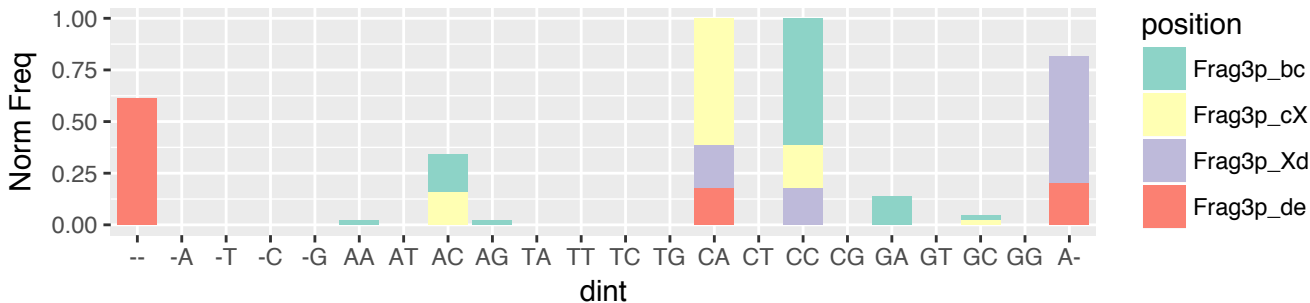

PAAD (n=413)  
 3'-tRF & exclusive (n=88)  
 3' terminus relative to 3' end of the tRNA (n=88)

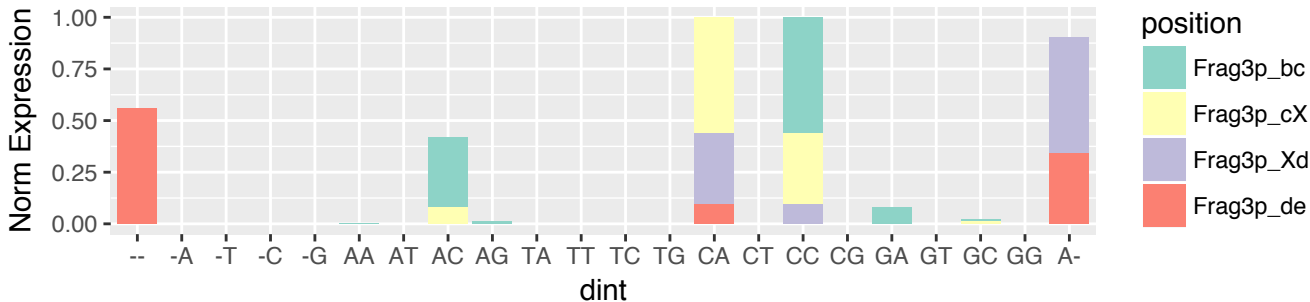

PCPG (n=486)  
5'-half & exclusive (n=3)  
5' terminus relative to 5' end of the tRNA (n=3)



PCPG (n=486)  
5'-half & exclusive (n=3)  
5' terminus relative to 5' end of the tRNA (n=3)

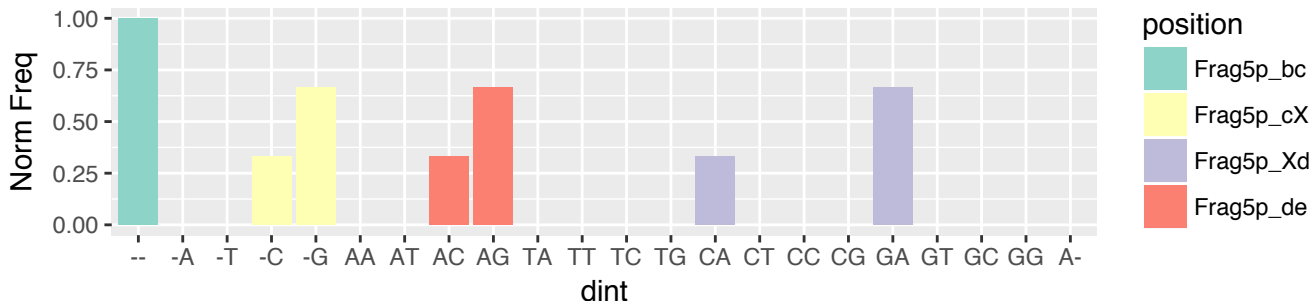

PCPG (n=486)  
5'-half & exclusive (n=3)  
5' terminus relative to 5' end of the tRNA (n=3)

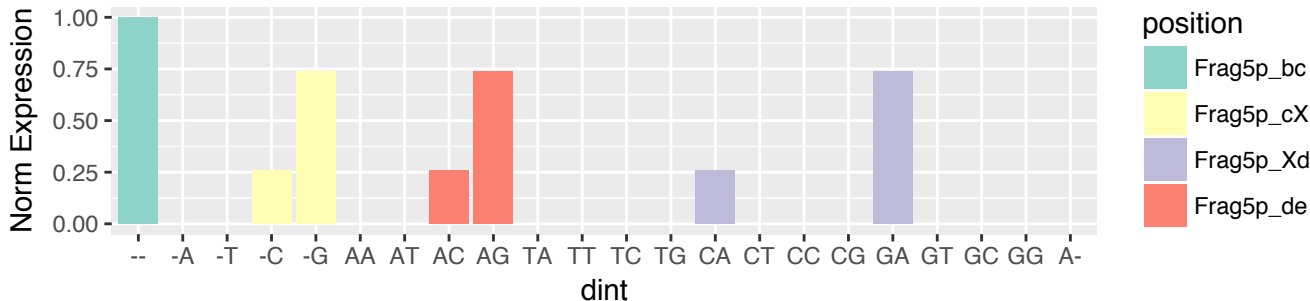



PCPG (n=486)

5'-half & exclusive (n=3)

3' terminus relative to 5' stem of A-loop (n=3)

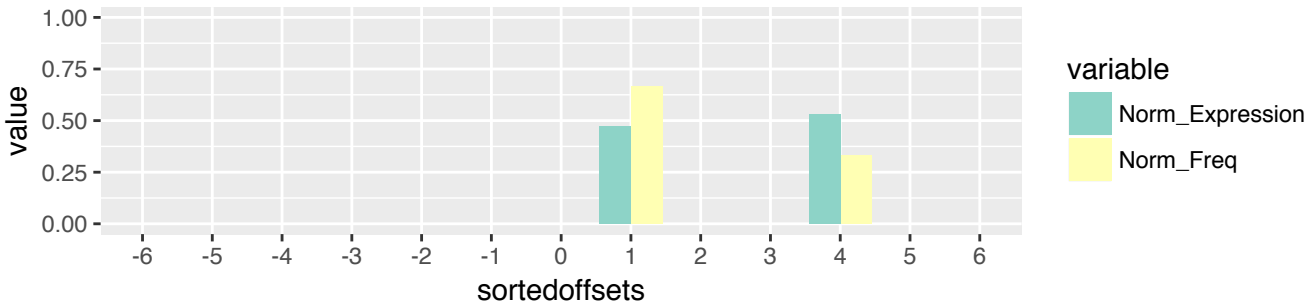

PCPG (n=486)

5'-half & exclusive (n=3)

3' terminus relative to 5' stem of A-loop (n=3)

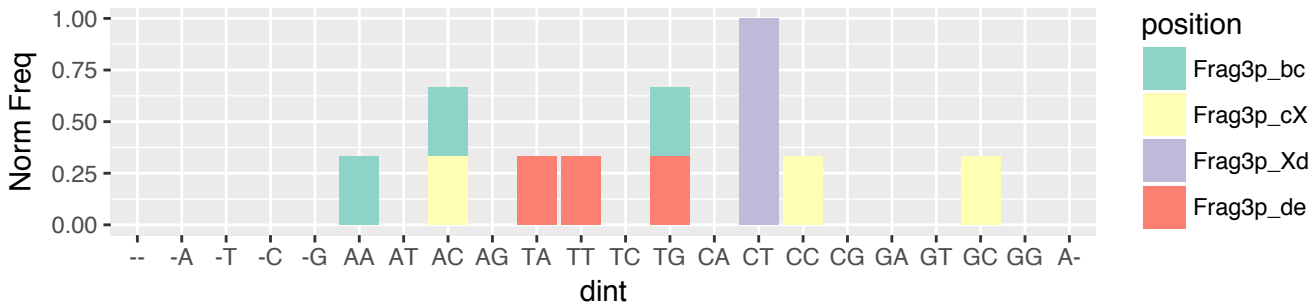

PCPG (n=486)

5'-half & exclusive (n=3)

3' terminus relative to 5' stem of A-loop (n=3)

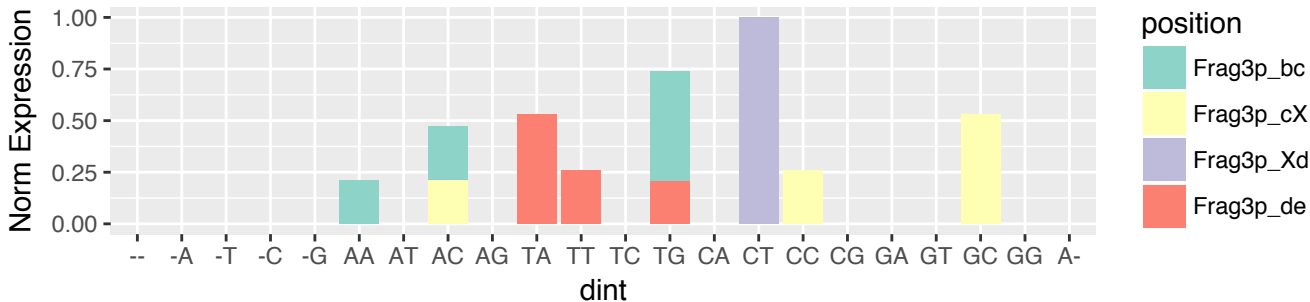

PCPG (n=486)

5'-tRF & exclusive (n=82)

5' terminus relative to 5' end of the tRNA (n=82)

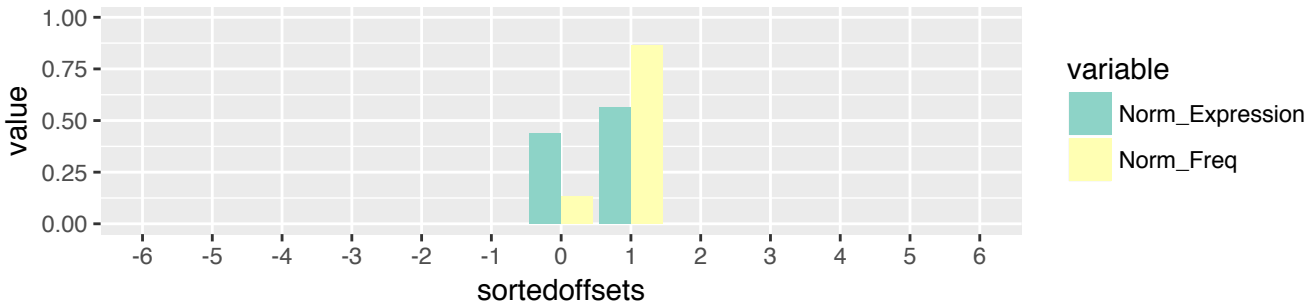

PCPG (n=486)

5'-tRF & exclusive (n=82)

5' terminus relative to 5' end of the tRNA (n=82)

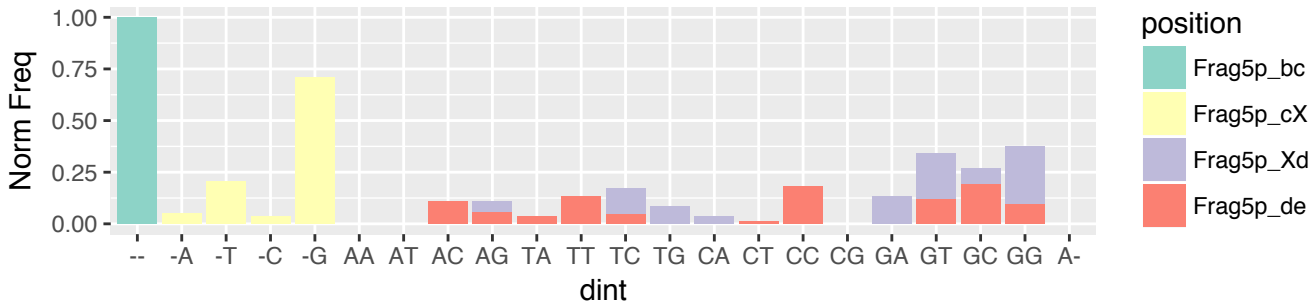

PCPG (n=486)

5'-tRF & exclusive (n=82)

5' terminus relative to 5' end of the tRNA (n=82)

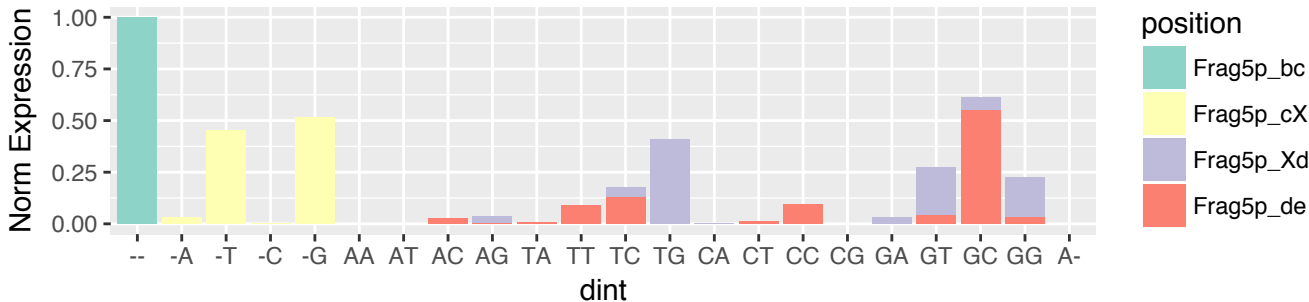

PCPG (n=486)  
5'-tRF & exclusive (n=82)  
3' terminus relative to 5' stem of D-loop (n=1)

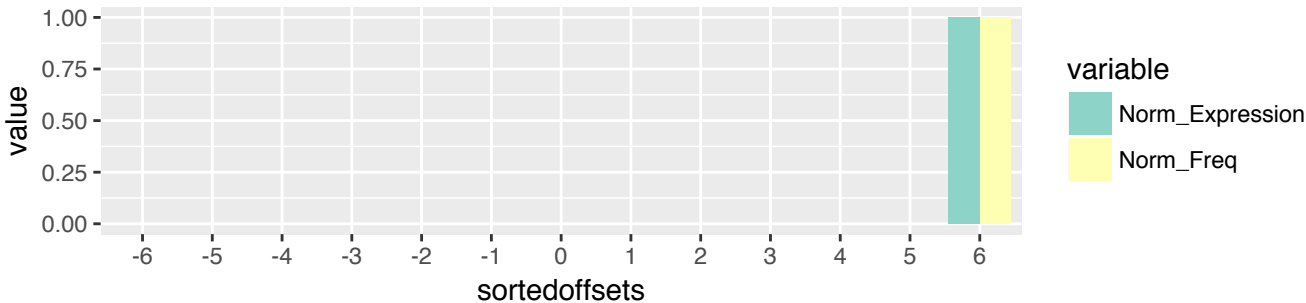

PCPG (n=486)  
5'-tRF & exclusive (n=82)  
3' terminus relative to 5' stem of D-loop (n=1)

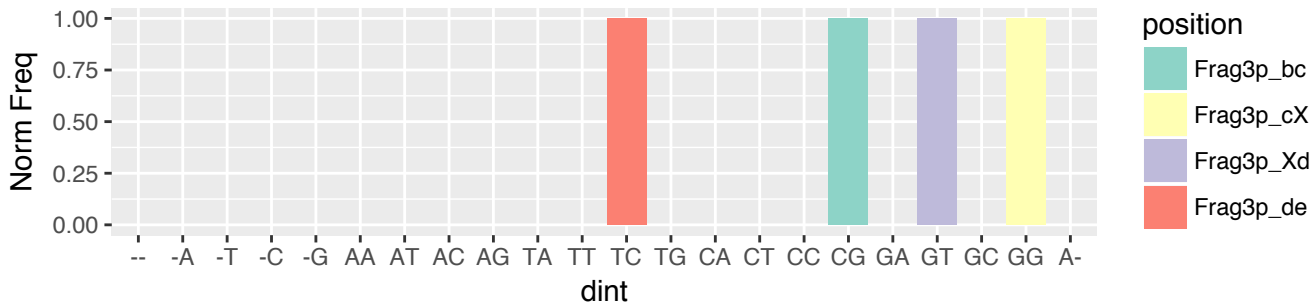

PCPG (n=486)  
5'-tRF & exclusive (n=82)  
3' terminus relative to 5' stem of D-loop (n=1)

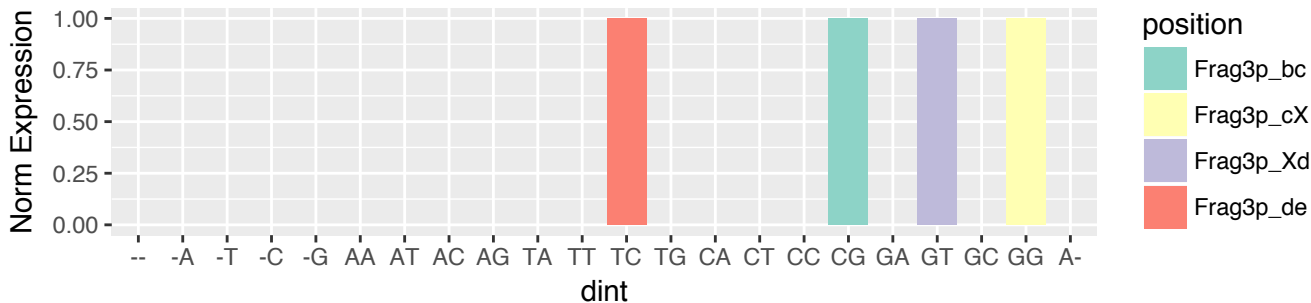

PCPG (n=486)  
 5'-tRF & exclusive (n=82)  
 3' terminus relative to 3' stem of D-loop (n=75)

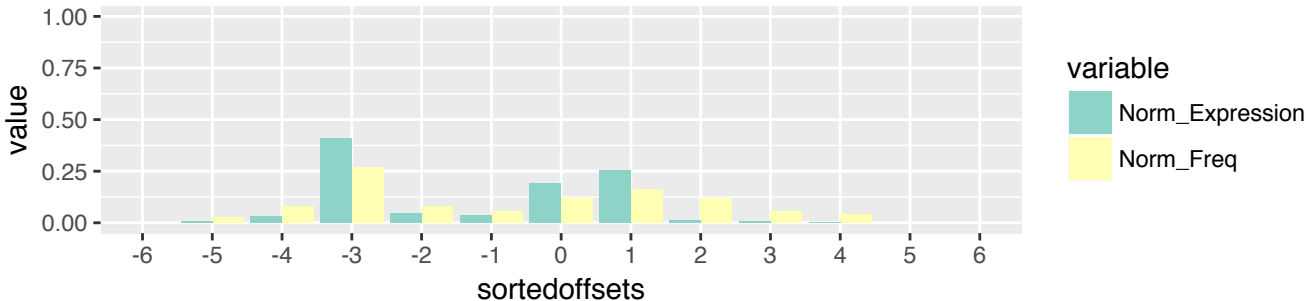

PCPG (n=486)  
 5'-tRF & exclusive (n=82)  
 3' terminus relative to 3' stem of D-loop (n=75)

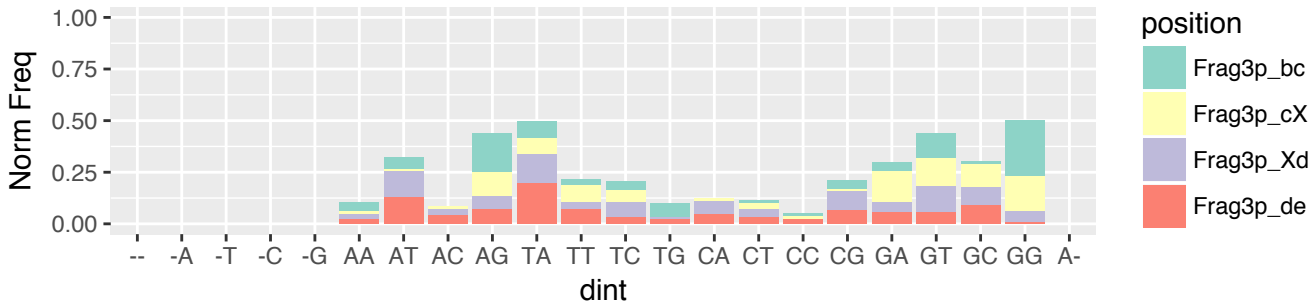

PCPG (n=486)  
 5'-tRF & exclusive (n=82)  
 3' terminus relative to 3' stem of D-loop (n=75)

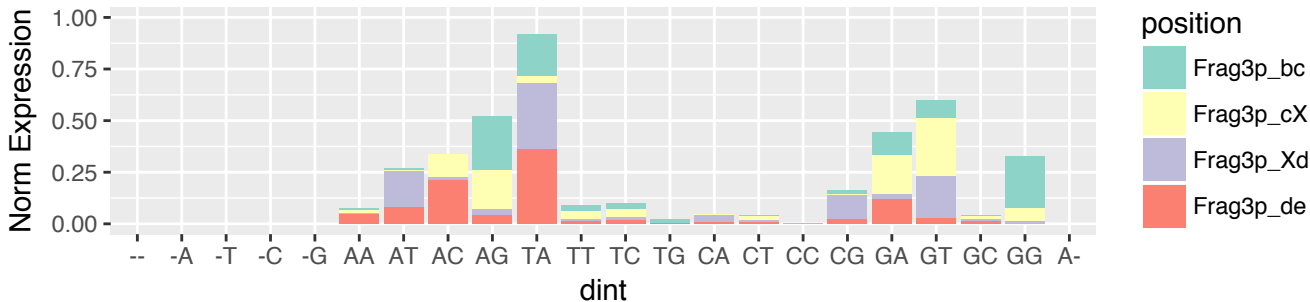

PCPG (n=486)

5'-tRF & exclusive (n=82)

3' terminus relative to 5' stem of A-loop (n=1)

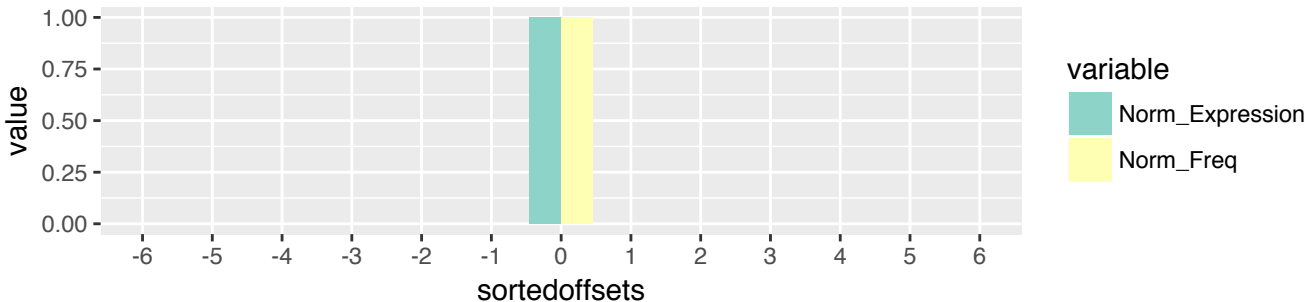

PCPG (n=486)

5'-tRF & exclusive (n=82)

3' terminus relative to 5' stem of A-loop (n=1)

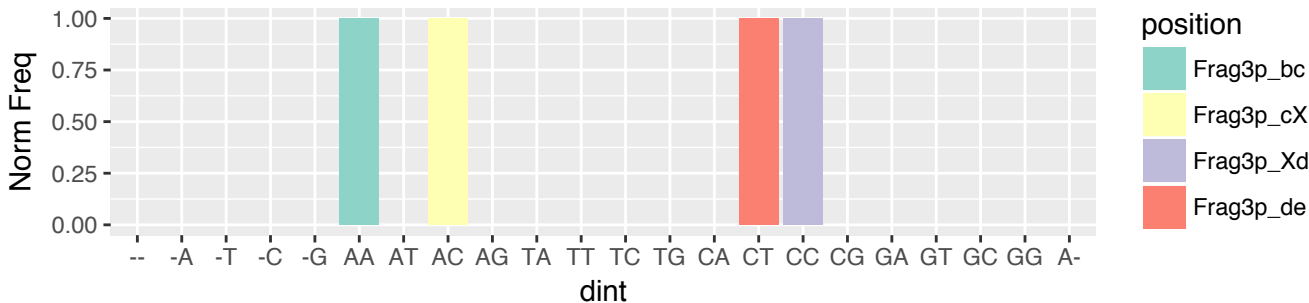

PCPG (n=486)

5'-tRF & exclusive (n=82)

3' terminus relative to 5' stem of A-loop (n=1)

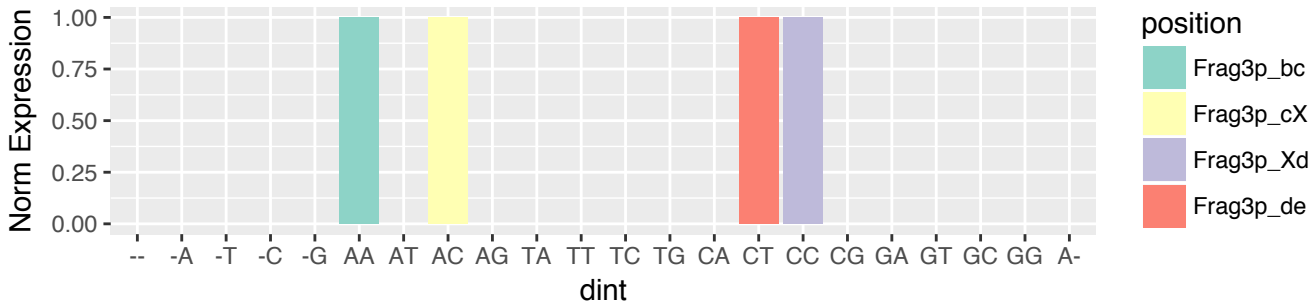

PCPG (n=486)  
 5'-tRF & exclusive (n=82)  
 3' terminus relative to 3' stem of A-loop (n=5)

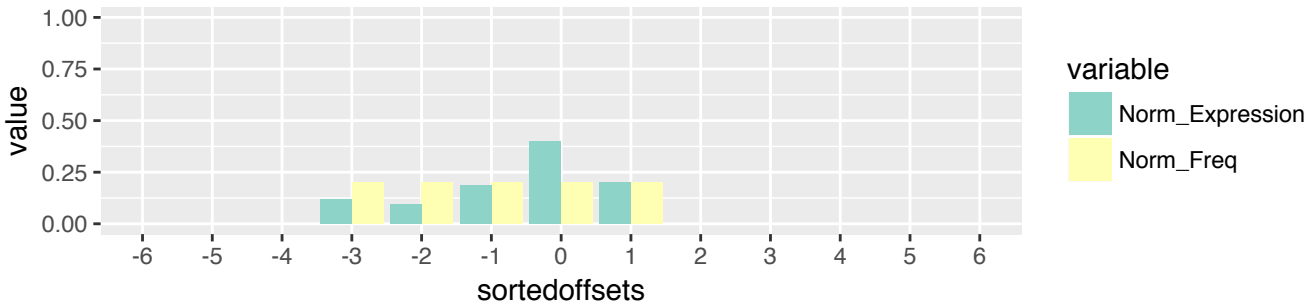

PCPG (n=486)  
 5'-tRF & exclusive (n=82)  
 3' terminus relative to 3' stem of A-loop (n=5)



PCPG (n=486)  
 5'-tRF & exclusive (n=82)  
 3' terminus relative to 3' stem of A-loop (n=5)

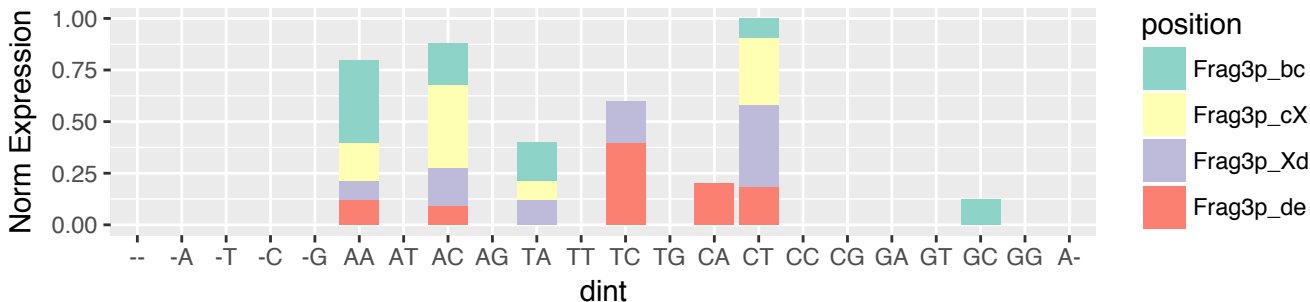

PCPG (n=486)  
i-tRF & exclusive (n=100)  
5' terminus relative to 5' end of the tRNA (n=4)

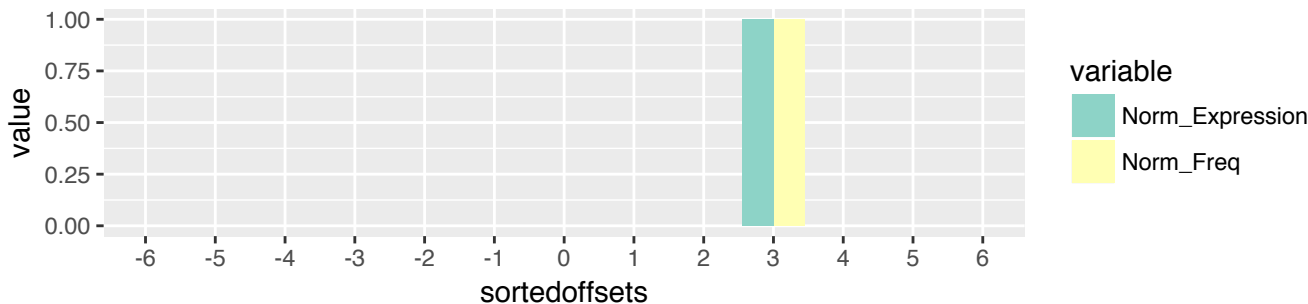

PCPG (n=486)  
i-tRF & exclusive (n=100)  
5' terminus relative to 5' end of the tRNA (n=4)

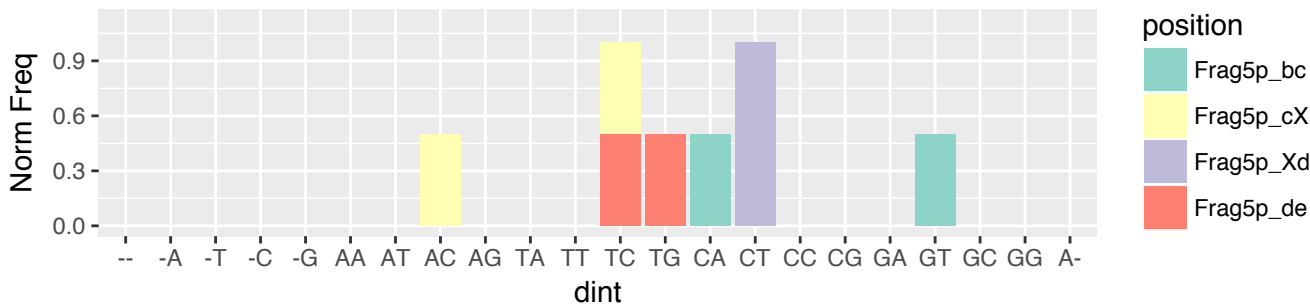

PCPG (n=486)  
i-tRF & exclusive (n=100)  
5' terminus relative to 5' end of the tRNA (n=4)

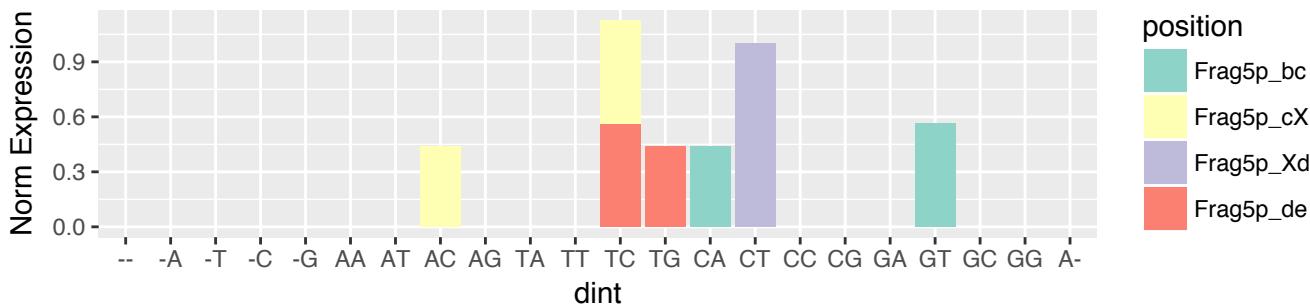

PCPG (n=486)  
 i-tRF & exclusive (n=100)  
 5' terminus relative to 5' stem of D-loop (n=33)

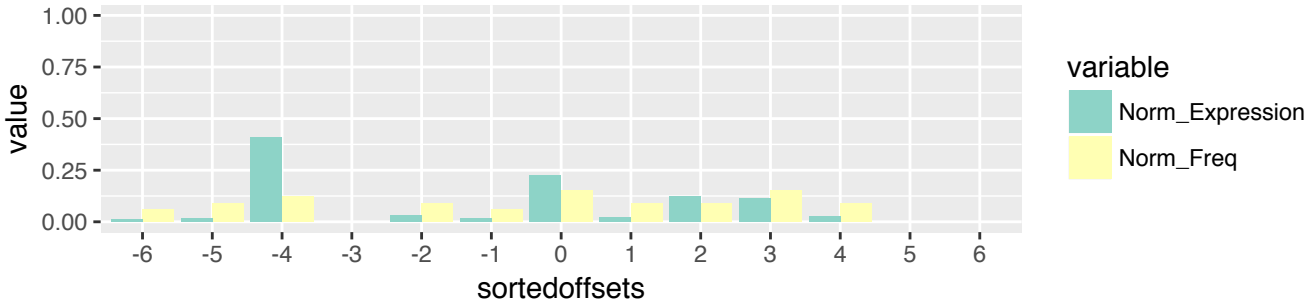

PCPG (n=486)  
 i-tRF & exclusive (n=100)  
 5' terminus relative to 5' stem of D-loop (n=33)

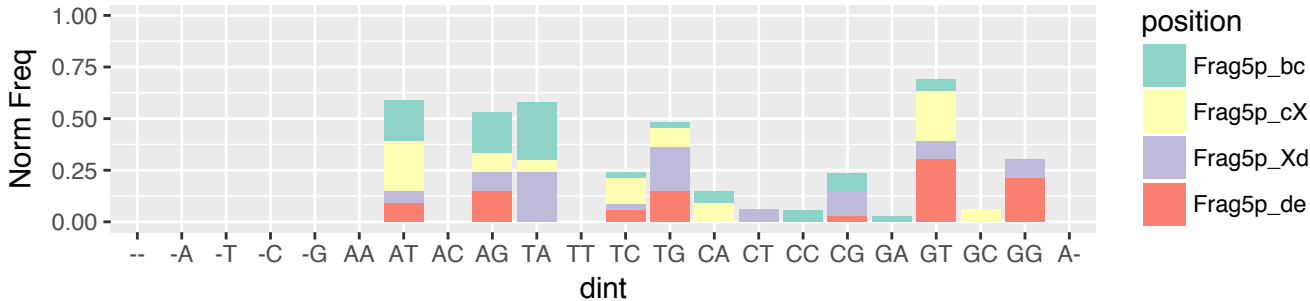

PCPG (n=486)  
 i-tRF & exclusive (n=100)  
 5' terminus relative to 5' stem of D-loop (n=33)

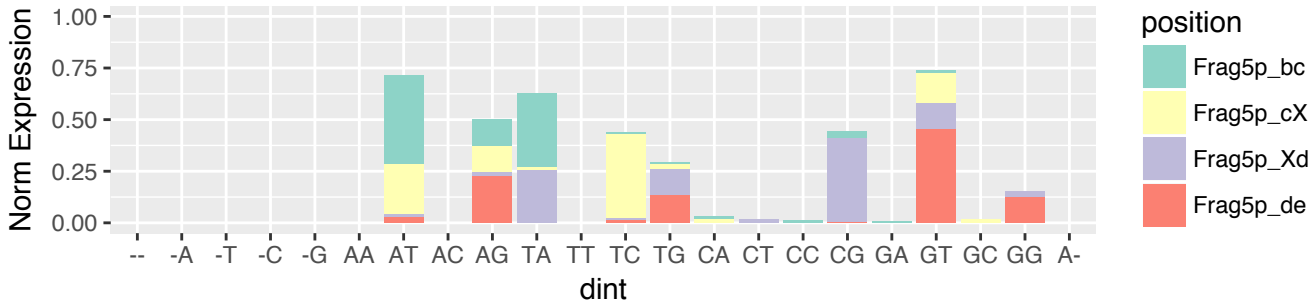



PCPG (n=486)  
i-tRF & exclusive (n=100)  
5' terminus relative to 3' stem of D-loop (n=6)

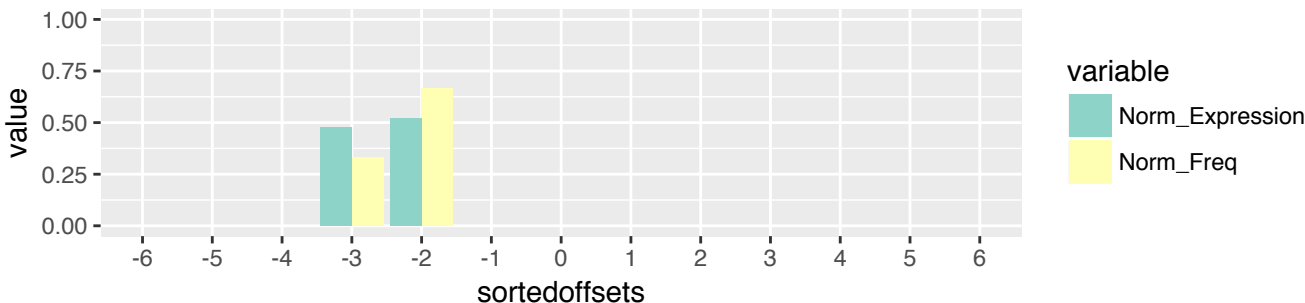

PCPG (n=486)  
i-tRF & exclusive (n=100)  
5' terminus relative to 3' stem of D-loop (n=6)

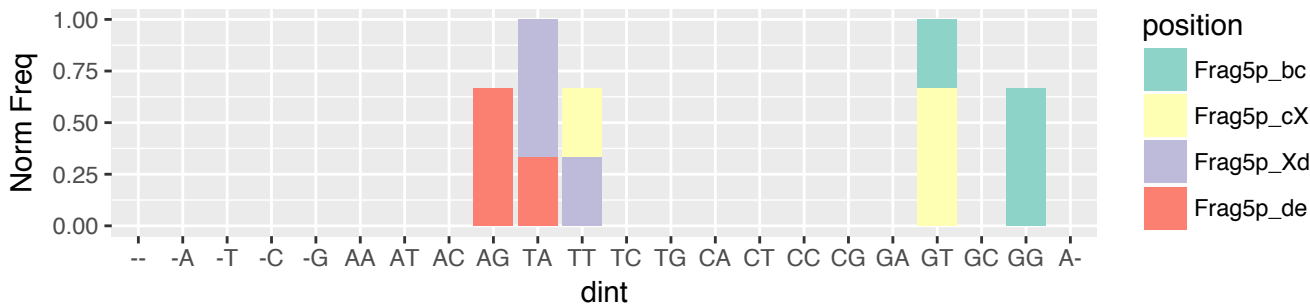

PCPG (n=486)  
i-tRF & exclusive (n=100)  
5' terminus relative to 3' stem of D-loop (n=6)

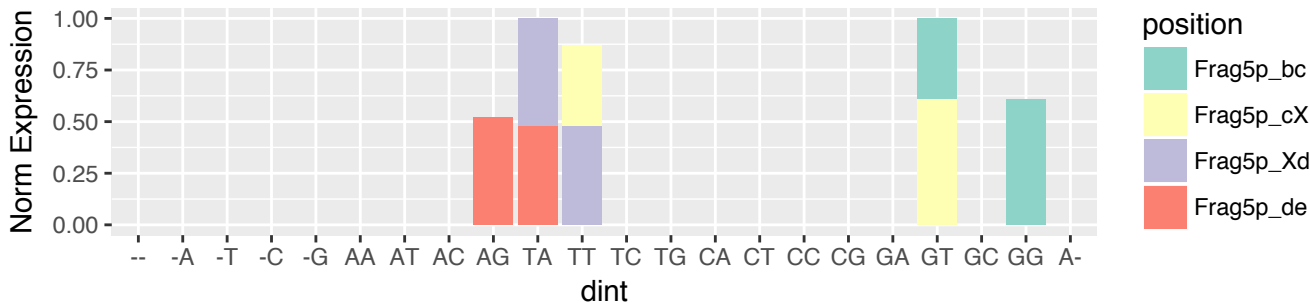

PCPG (n=486)  
i-tRF & exclusive (n=100)  
5' terminus relative to 5' stem of A-loop (n=20)

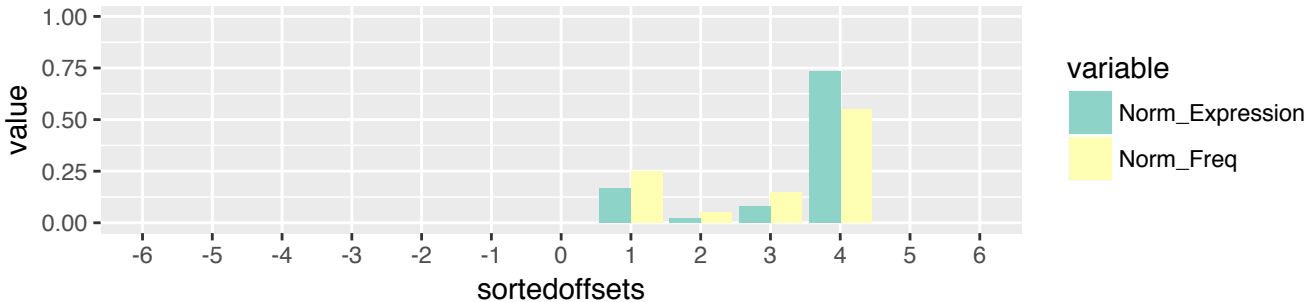

PCPG (n=486)  
i-tRF & exclusive (n=100)  
5' terminus relative to 5' stem of A-loop (n=20)

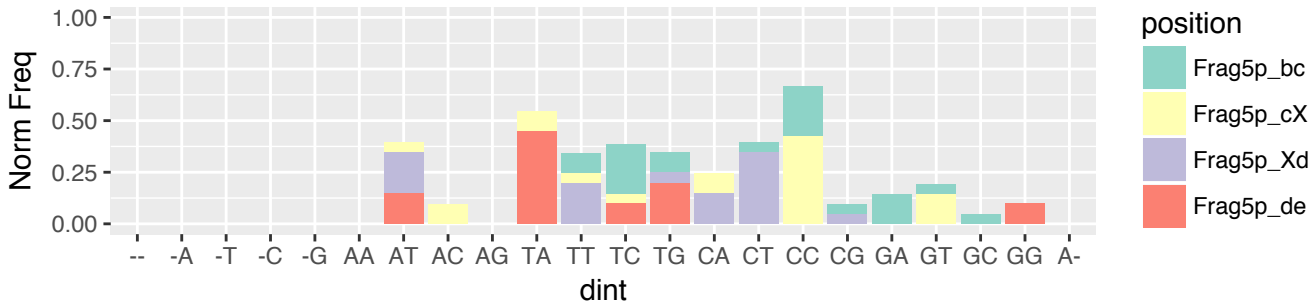

PCPG (n=486)  
i-tRF & exclusive (n=100)  
5' terminus relative to 5' stem of A-loop (n=20)

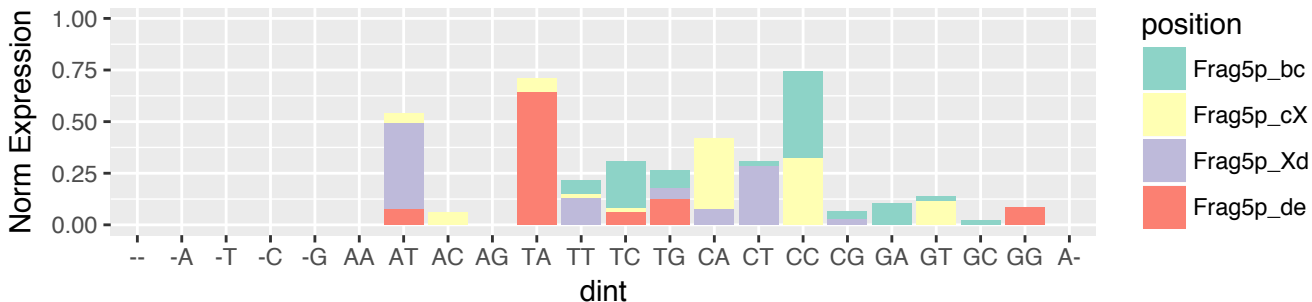

PCPG (n=486)  
i-tRF & exclusive (n=100)  
5' terminus relative to 3' stem of A-loop (n=32)

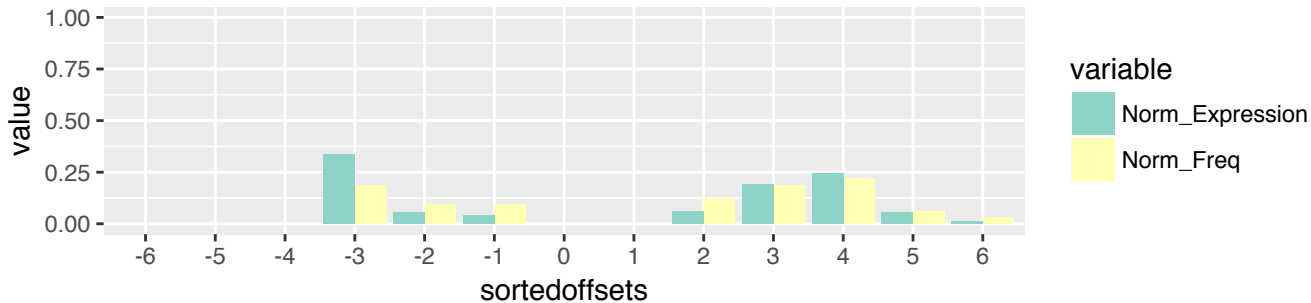

PCPG (n=486)  
i-tRF & exclusive (n=100)  
5' terminus relative to 3' stem of A-loop (n=32)

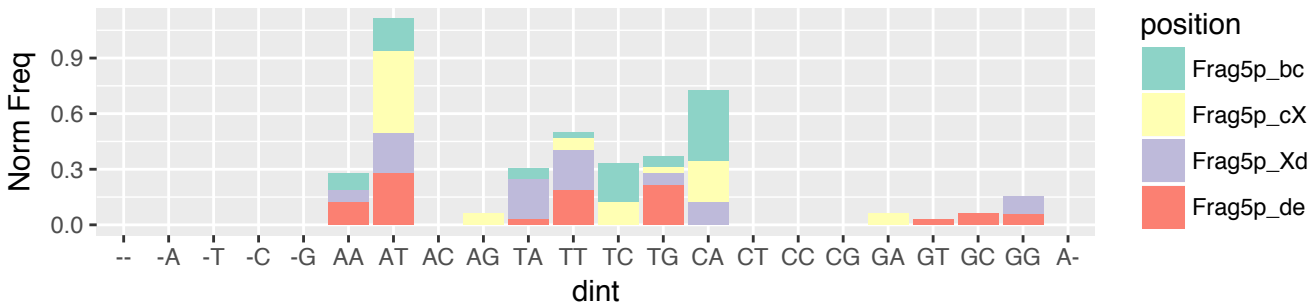

PCPG (n=486)  
i-tRF & exclusive (n=100)  
5' terminus relative to 3' stem of A-loop (n=32)

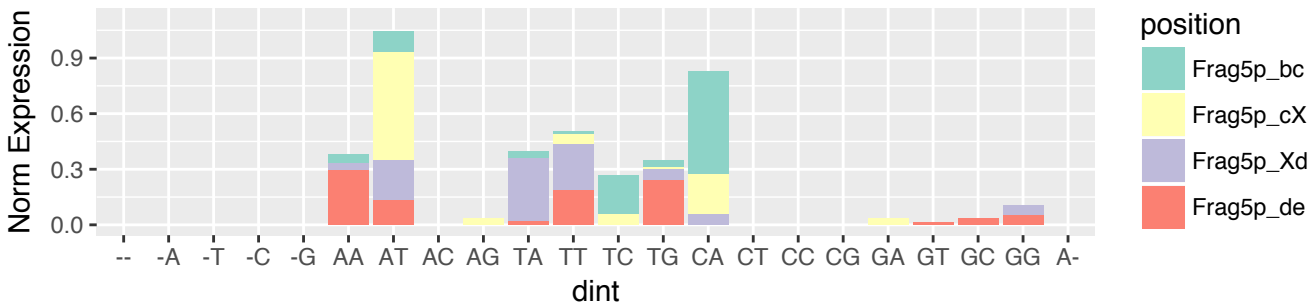

PCPG (n=486)  
 i-tRF & exclusive (n=100)  
 5' terminus relative to 5' stem of T-loop (n=5)

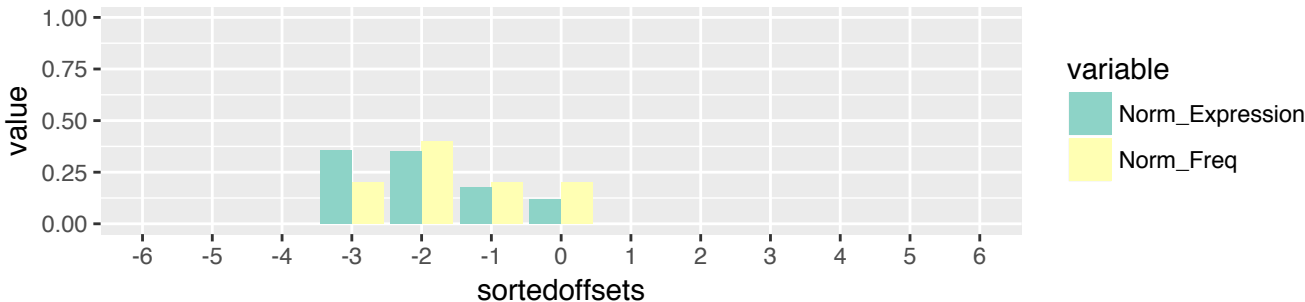

PCPG (n=486)  
 i-tRF & exclusive (n=100)  
 5' terminus relative to 5' stem of T-loop (n=5)

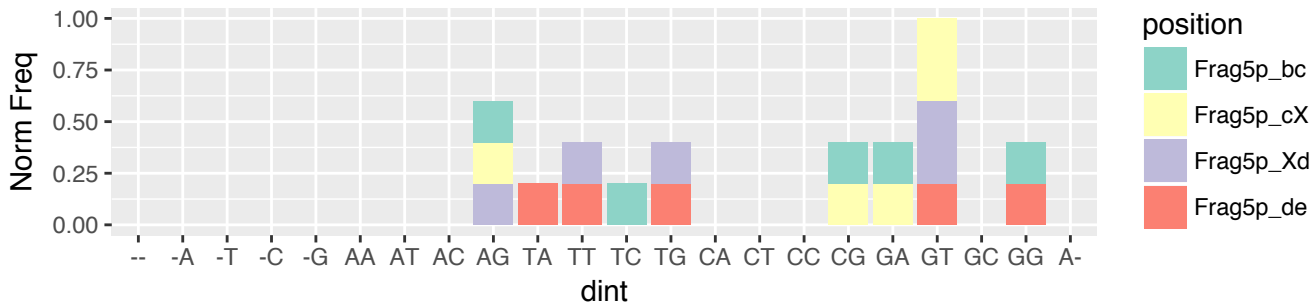

PCPG (n=486)  
 i-tRF & exclusive (n=100)  
 5' terminus relative to 5' stem of T-loop (n=5)

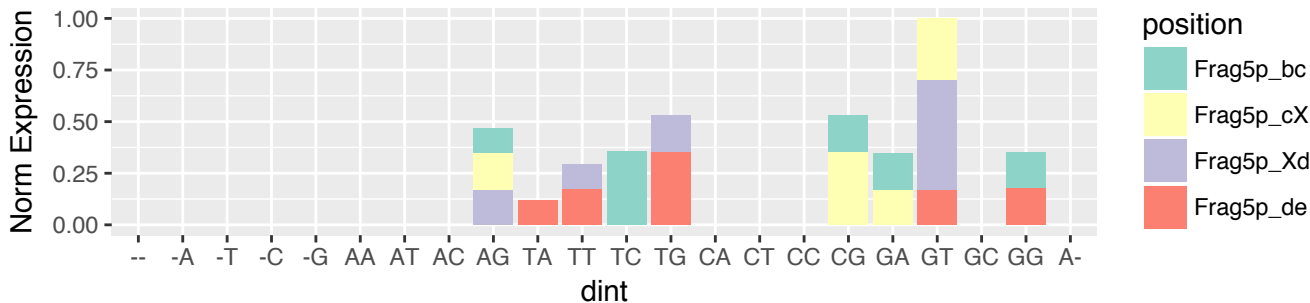

PCPG (n=486)  
 i-tRF & exclusive (n=100)  
 3' terminus relative to 3' stem of D-loop (n=2)

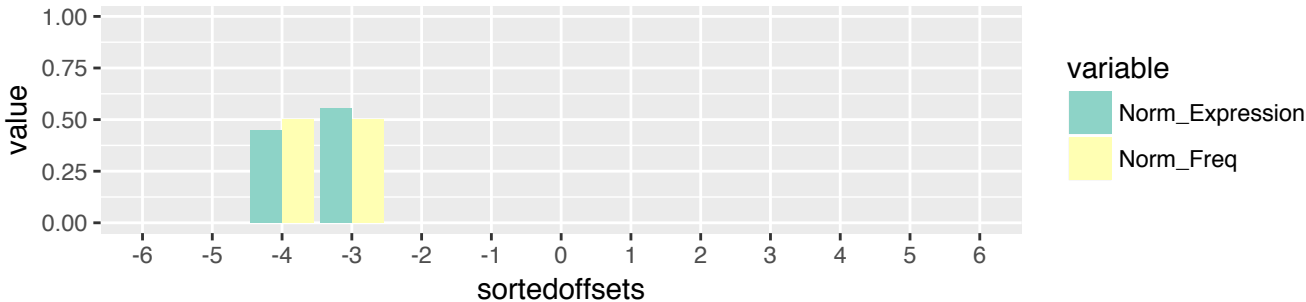

PCPG (n=486)  
 i-tRF & exclusive (n=100)  
 3' terminus relative to 3' stem of D-loop (n=2)

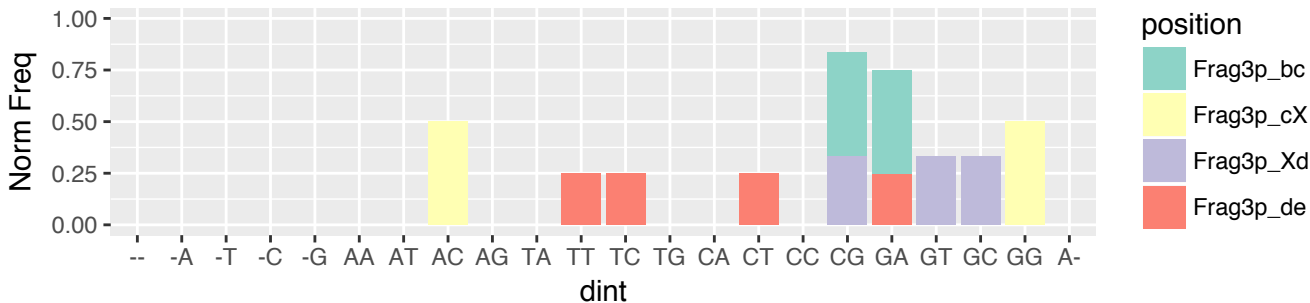

PCPG (n=486)  
 i-tRF & exclusive (n=100)  
 3' terminus relative to 3' stem of D-loop (n=2)

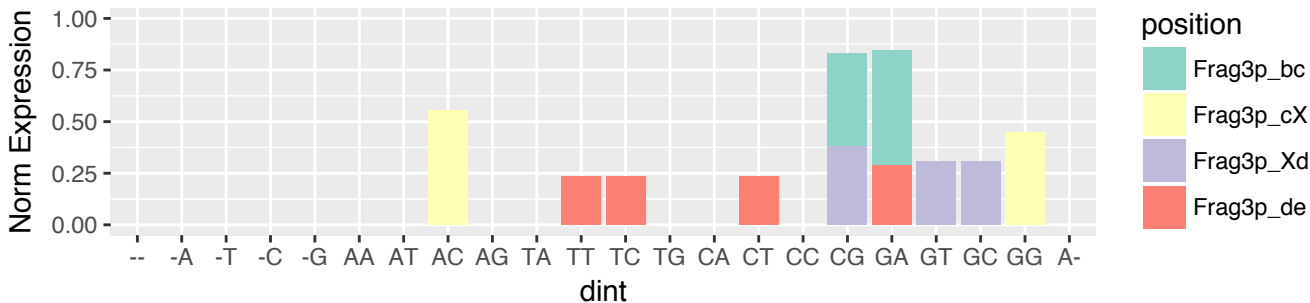

PCPG (n=486)  
i-tRF & exclusive (n=100)  
3' terminus relative to 5' stem of A-loop (n=30)

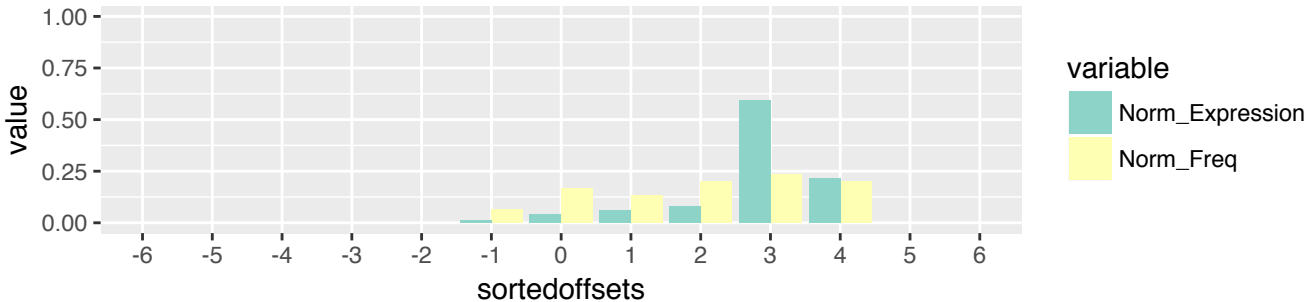

PCPG (n=486)  
i-tRF & exclusive (n=100)  
3' terminus relative to 5' stem of A-loop (n=30)

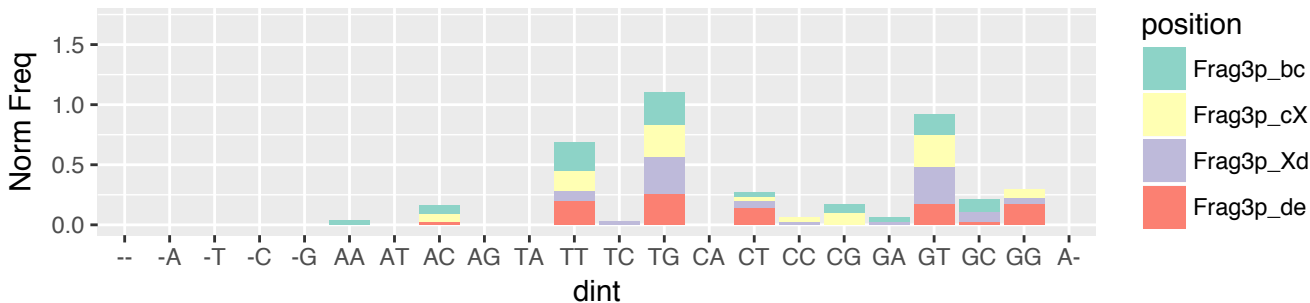

PCPG (n=486)  
i-tRF & exclusive (n=100)  
3' terminus relative to 5' stem of A-loop (n=30)

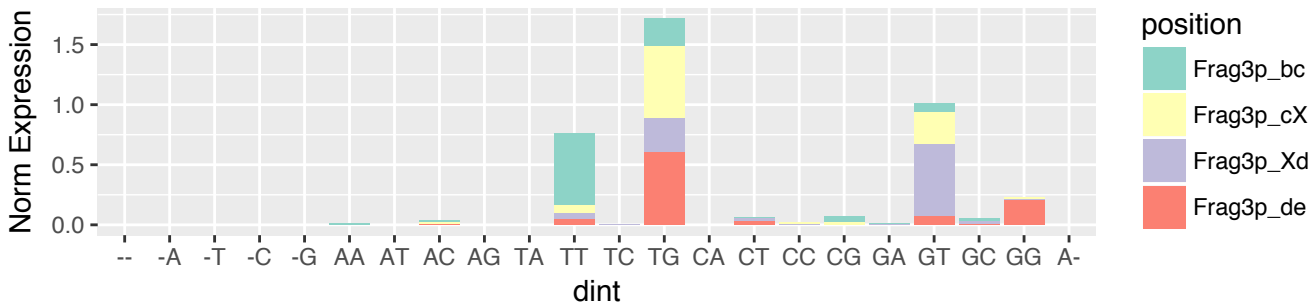

PCPG (n=486)  
i-tRF & exclusive (n=100)  
3' terminus relative to 3' stem of A-loop (n=13)

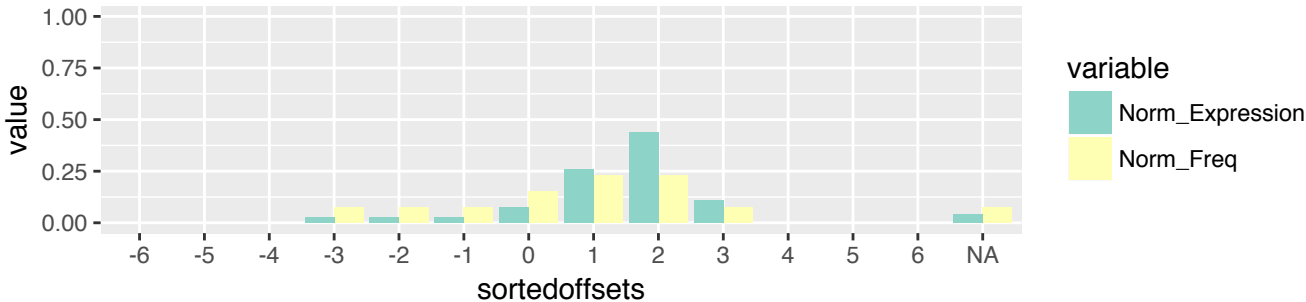

PCPG (n=486)  
i-tRF & exclusive (n=100)  
3' terminus relative to 3' stem of A-loop (n=13)

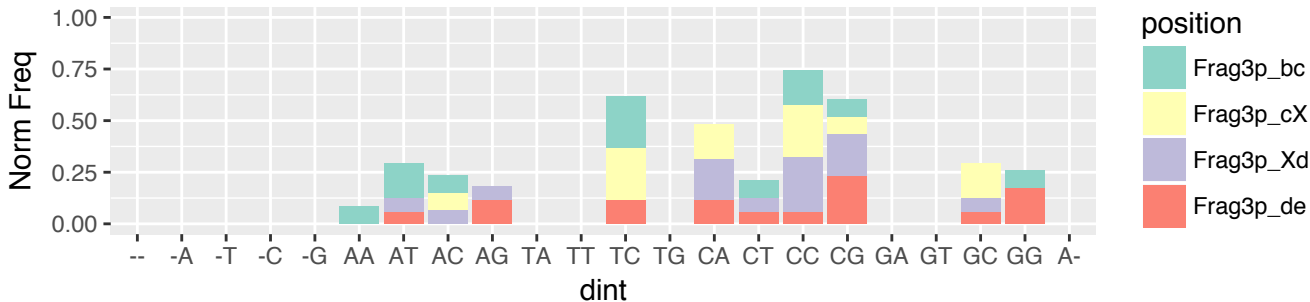

PCPG (n=486)  
i-tRF & exclusive (n=100)  
3' terminus relative to 3' stem of A-loop (n=13)

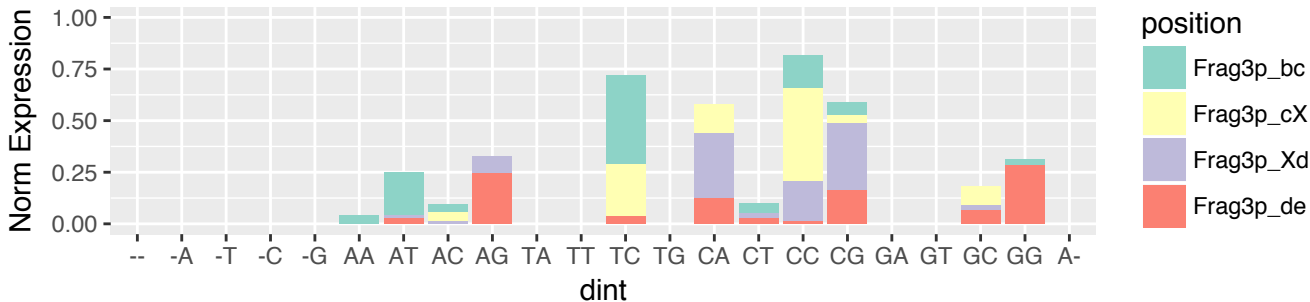

PCPG (n=486)  
i-tRF & exclusive (n=100)  
3' terminus relative to 5' stem of T-loop (n=21)

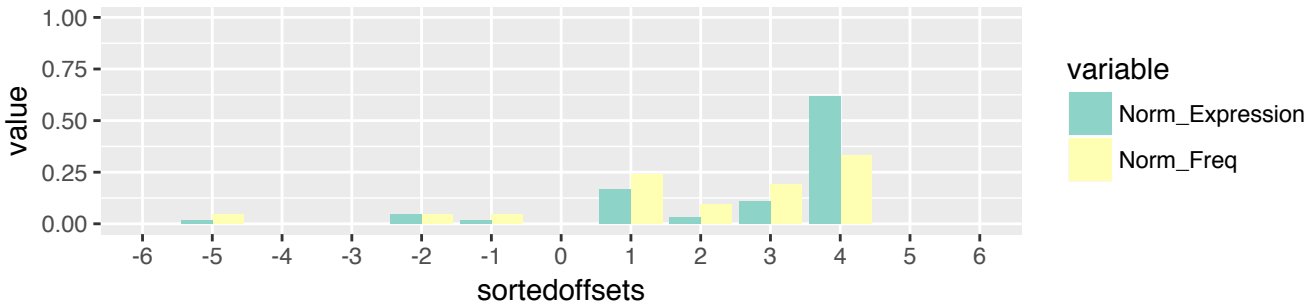

PCPG (n=486)  
i-tRF & exclusive (n=100)  
3' terminus relative to 5' stem of T-loop (n=21)

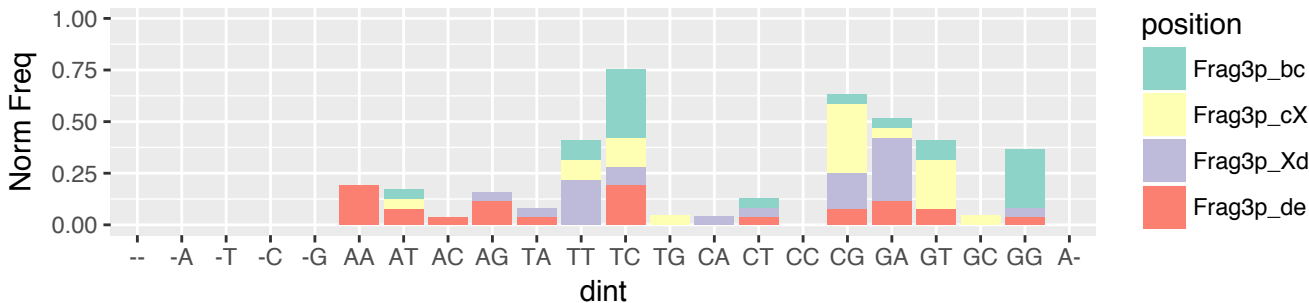

PCPG (n=486)  
i-tRF & exclusive (n=100)  
3' terminus relative to 5' stem of T-loop (n=21)

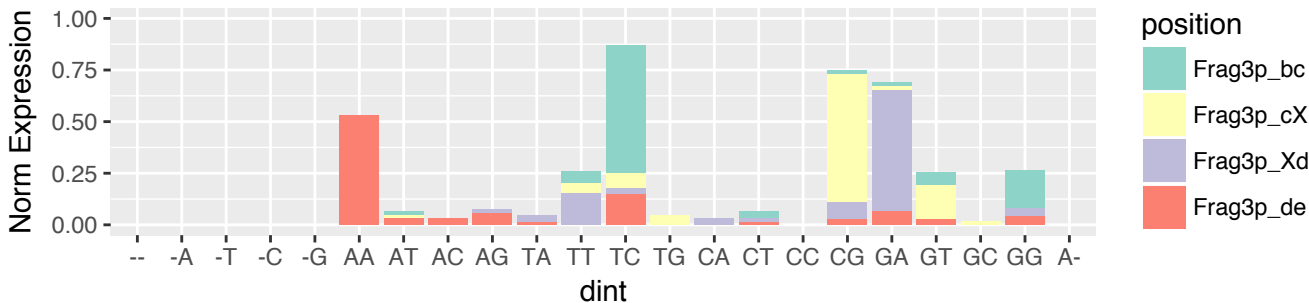



PCPG (n=486)  
i-tRF & exclusive (n=100)  
3' terminus relative to 3' stem of T-loop (n=29)

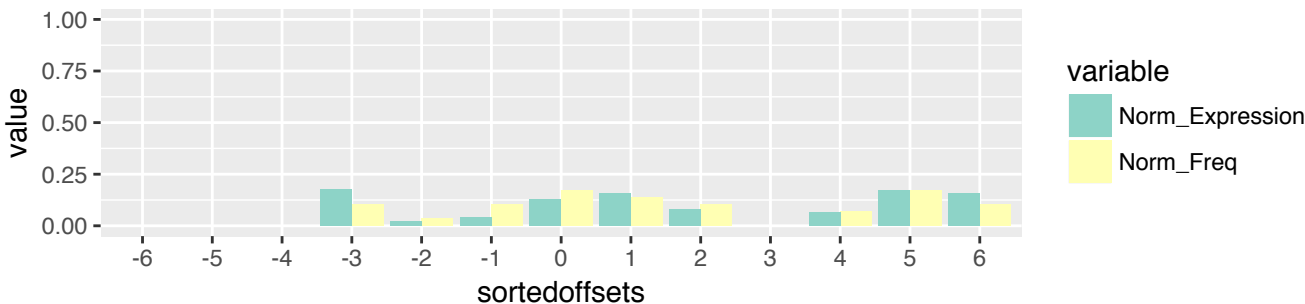

PCPG (n=486)  
i-tRF & exclusive (n=100)  
3' terminus relative to 3' stem of T-loop (n=29)

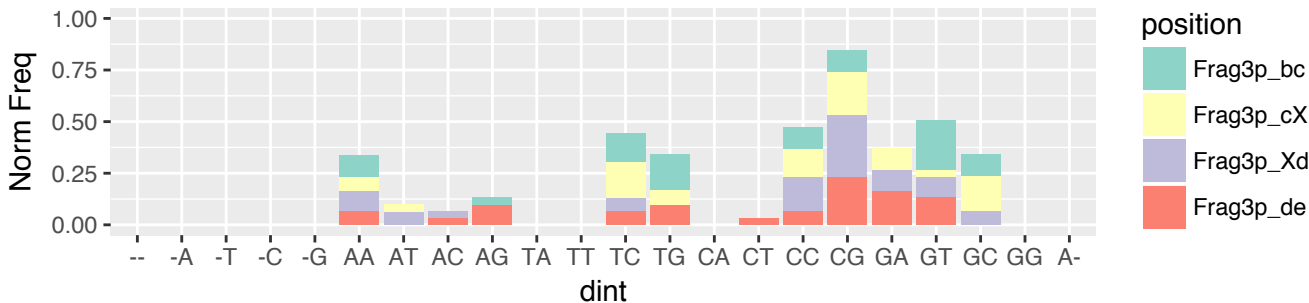

PCPG (n=486)  
i-tRF & exclusive (n=100)  
3' terminus relative to 3' stem of T-loop (n=29)

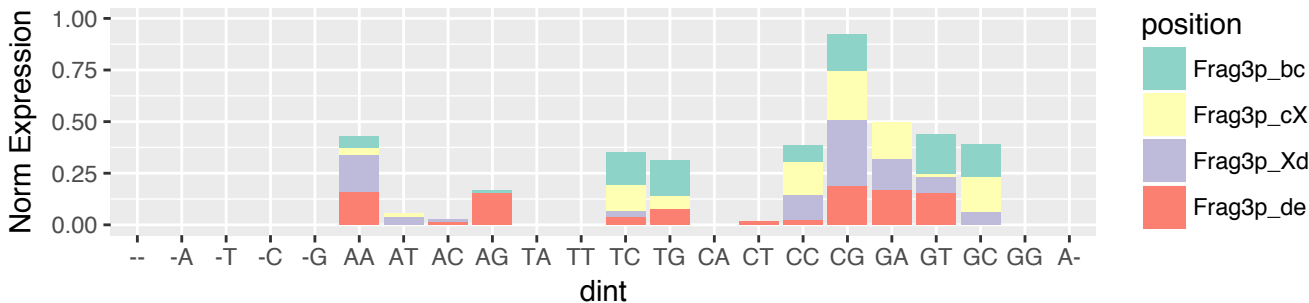

PCPG (n=486)  
 i-tRF & exclusive (n=100)  
 3' terminus relative to 3' end of the tRNA (n=6)

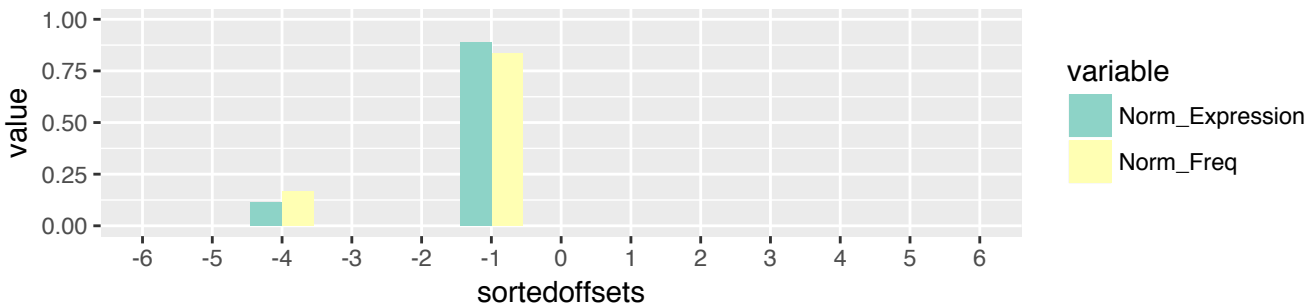

PCPG (n=486)  
 i-tRF & exclusive (n=100)  
 3' terminus relative to 3' end of the tRNA (n=6)

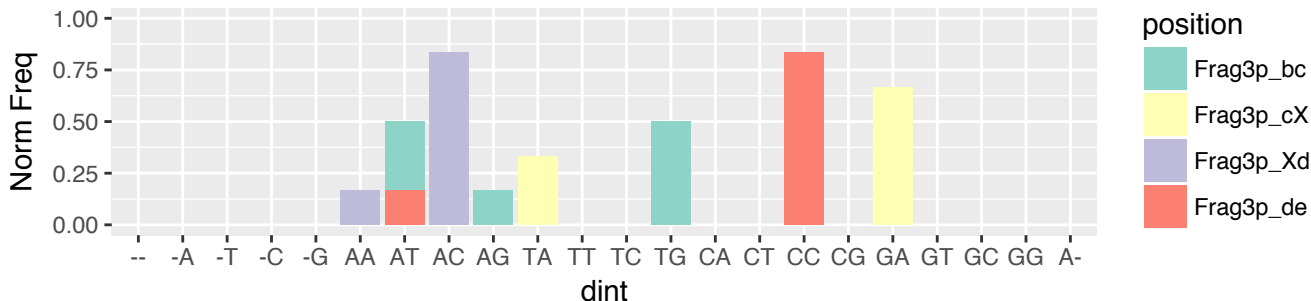

PCPG (n=486)  
 i-tRF & exclusive (n=100)  
 3' terminus relative to 3' end of the tRNA (n=6)

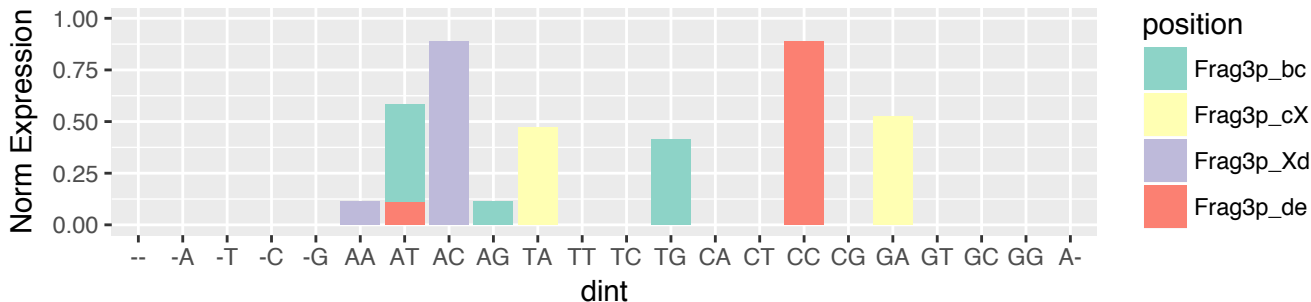

PCPG (n=486)  
 3'-tRF & exclusive (n=111)  
 5' terminus relative to 5' stem of T-loop (n=87)

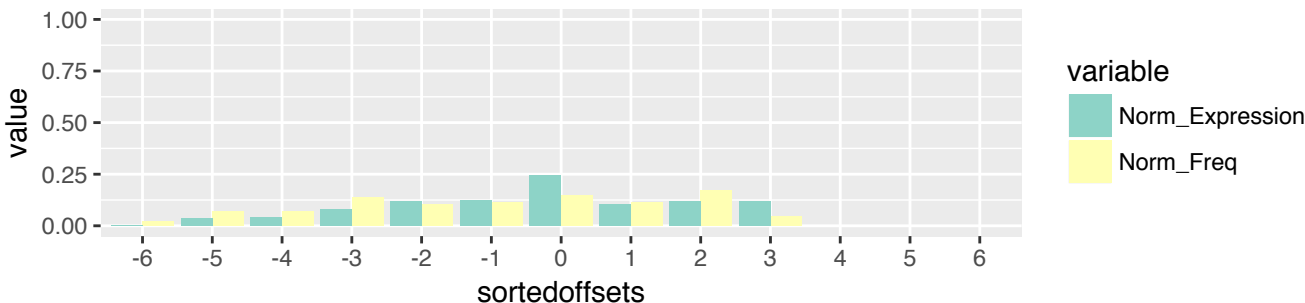

PCPG (n=486)  
 3'-tRF & exclusive (n=111)  
 5' terminus relative to 5' stem of T-loop (n=87)

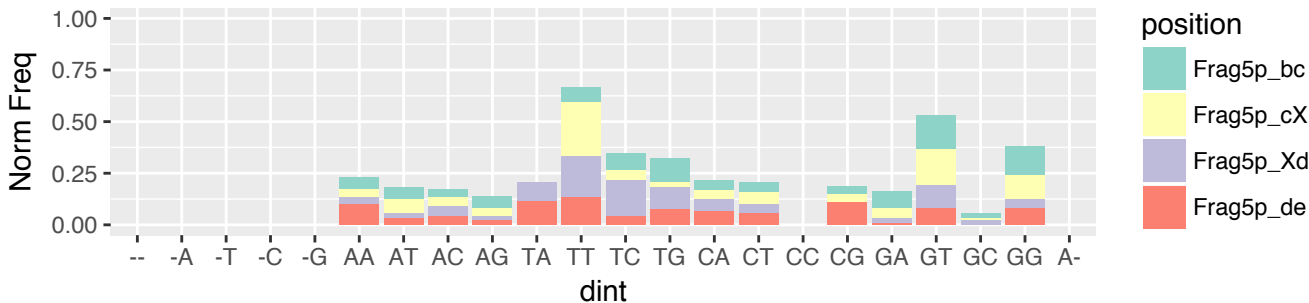

PCPG (n=486)  
 3'-tRF & exclusive (n=111)  
 5' terminus relative to 5' stem of T-loop (n=87)

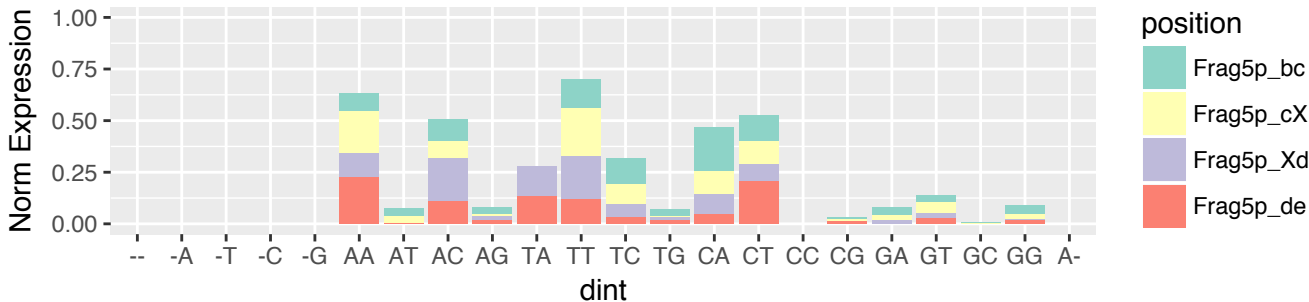

PCPG (n=486)  
 3'-tRF & exclusive (n=111)  
 5' terminus relative to 3' stem of T-loop (n=24)

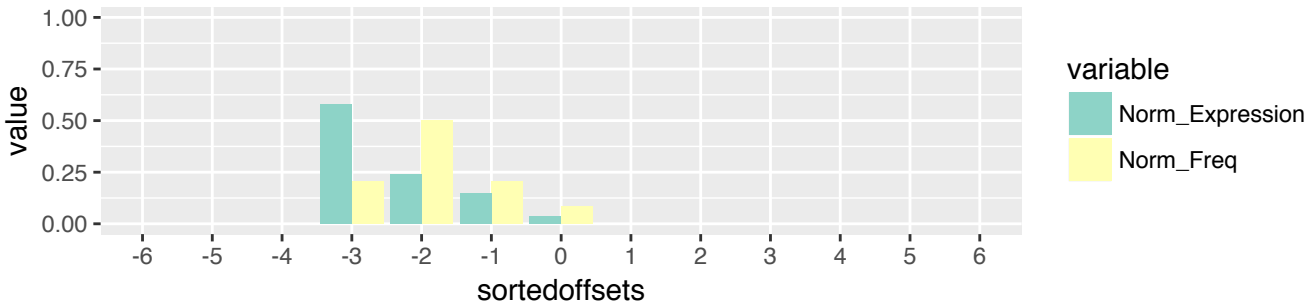

PCPG (n=486)  
 3'-tRF & exclusive (n=111)  
 5' terminus relative to 3' stem of T-loop (n=24)

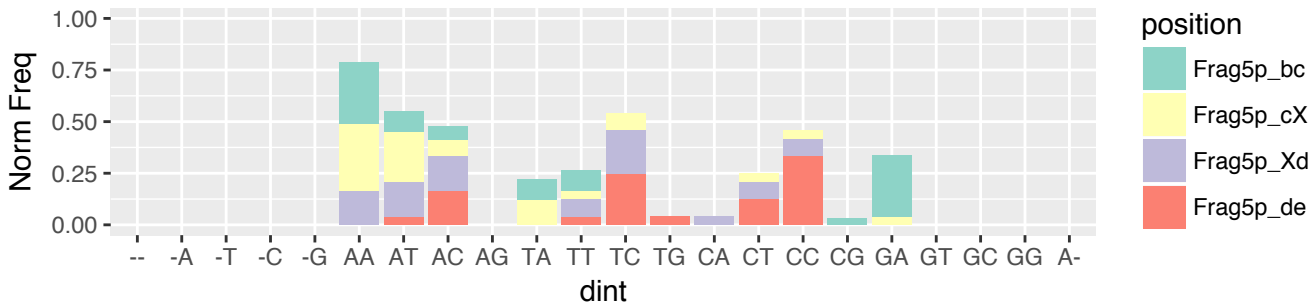

PCPG (n=486)  
 3'-tRF & exclusive (n=111)  
 5' terminus relative to 3' stem of T-loop (n=24)

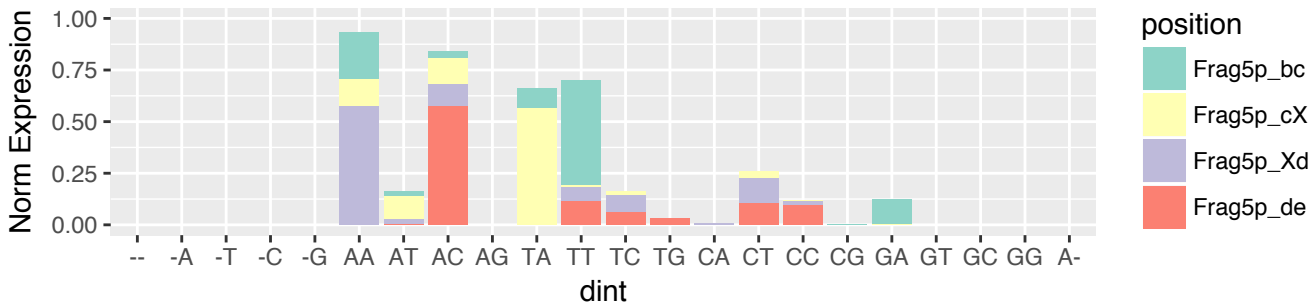

PCPG (n=486)  
 3'-tRF & exclusive (n=111)  
 3' terminus relative to 3' end of the tRNA (n=111)

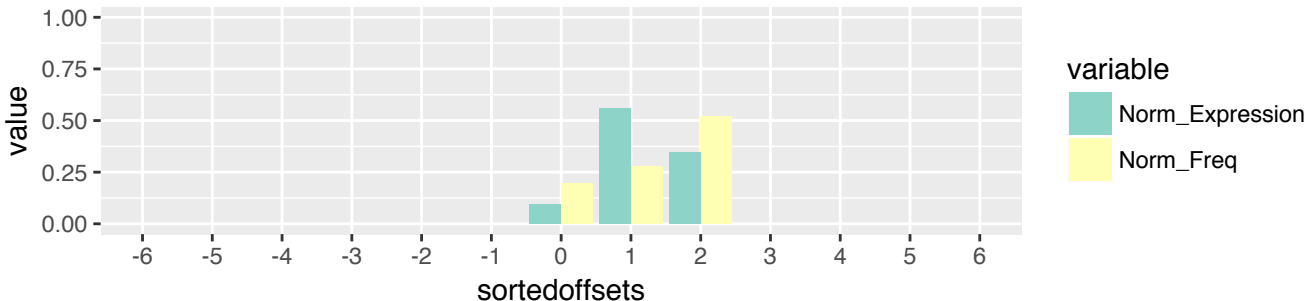

PCPG (n=486)  
 3'-tRF & exclusive (n=111)  
 3' terminus relative to 3' end of the tRNA (n=111)

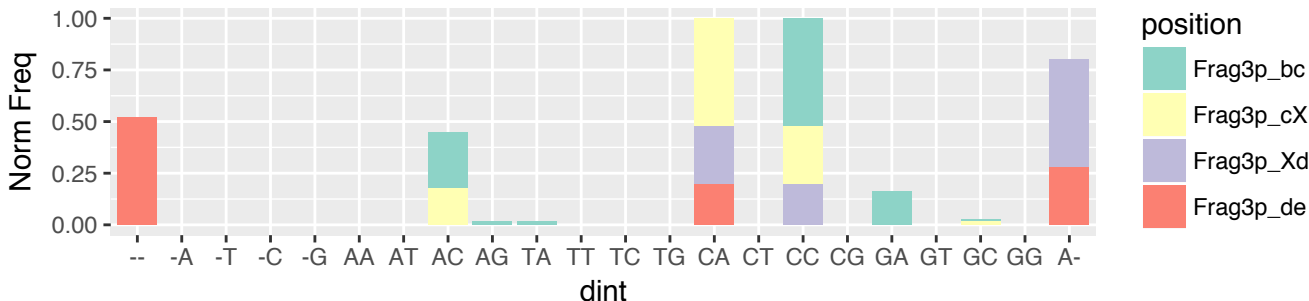

PCPG (n=486)  
 3'-tRF & exclusive (n=111)  
 3' terminus relative to 3' end of the tRNA (n=111)

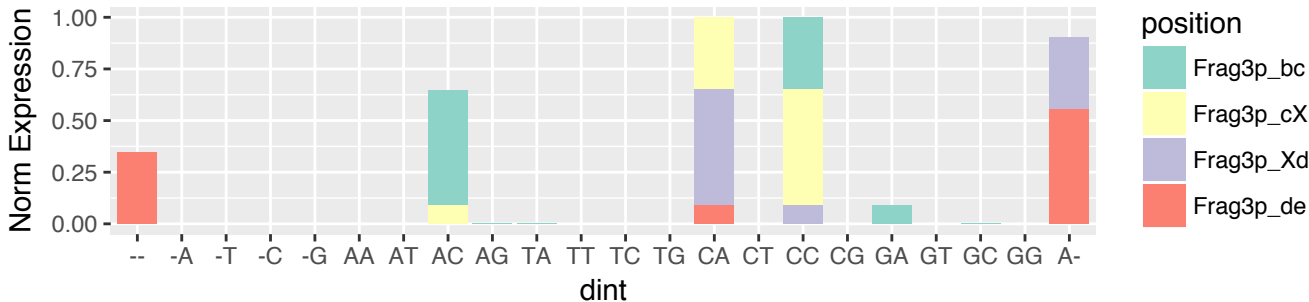

PRAD (n=710)  
5'-half & exclusive (n=3)  
5' terminus relative to 5' end of the tRNA (n=3)



PRAD (n=710)  
5'-half & exclusive (n=3)  
5' terminus relative to 5' end of the tRNA (n=3)

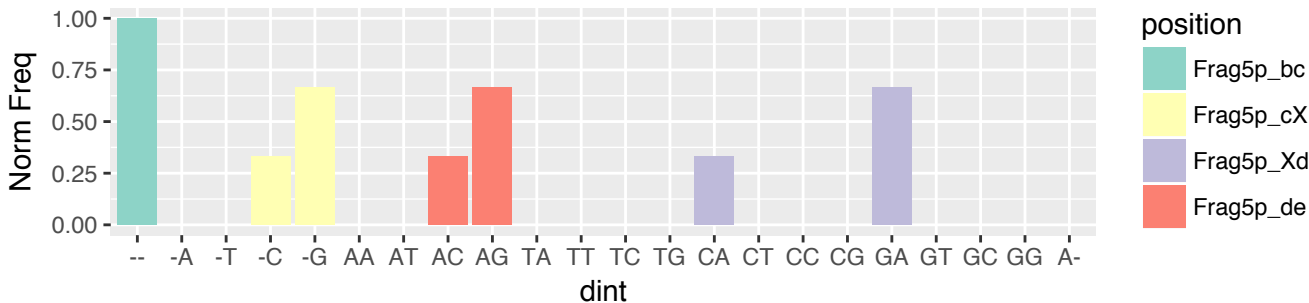

PRAD (n=710)  
5'-half & exclusive (n=3)  
5' terminus relative to 5' end of the tRNA (n=3)

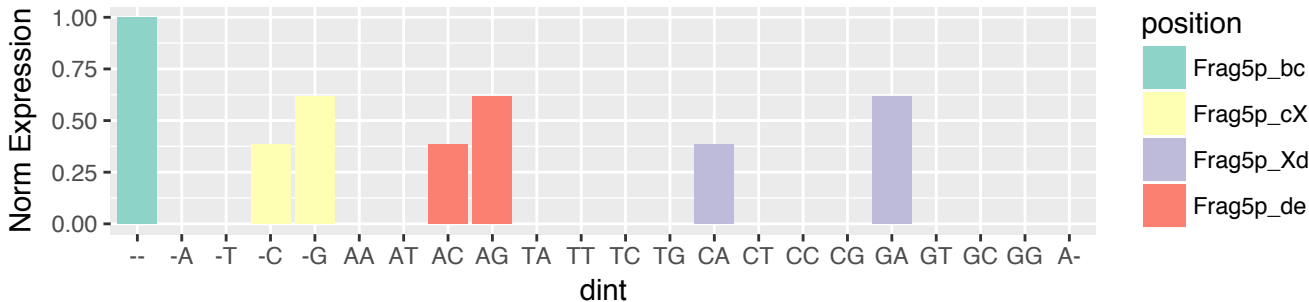

PRAD (n=710)  
 5'-half & exclusive (n=3)  
 3' terminus relative to 5' stem of A-loop (n=3)

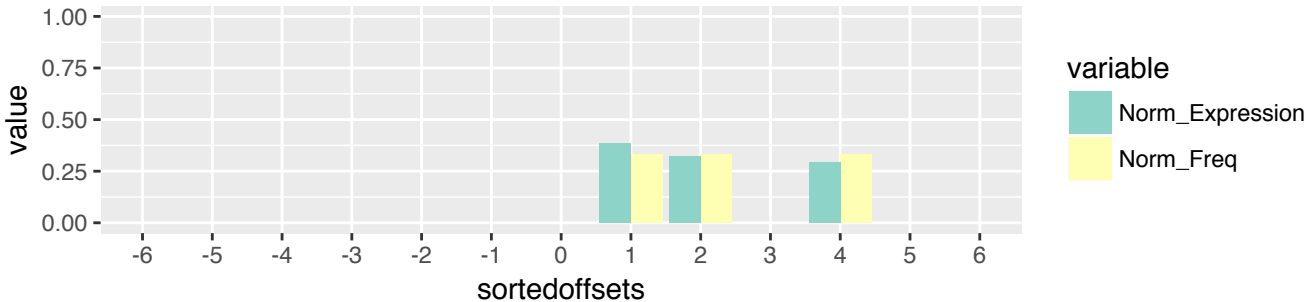

PRAD (n=710)  
 5'-half & exclusive (n=3)  
 3' terminus relative to 5' stem of A-loop (n=3)

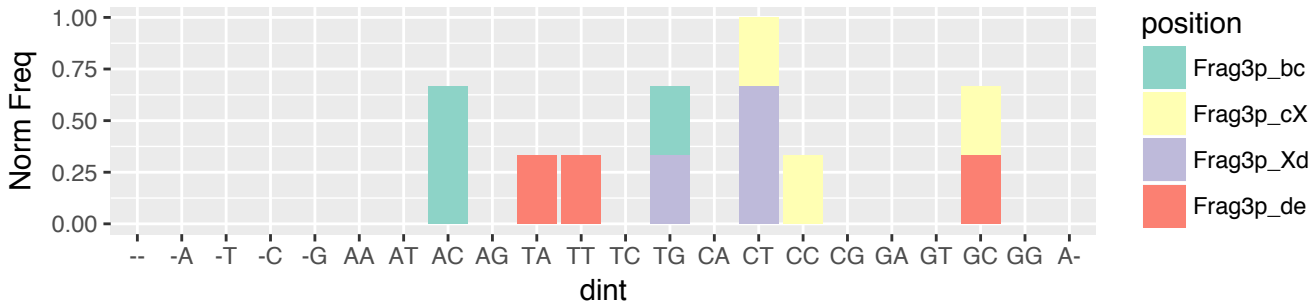

PRAD (n=710)  
 5'-half & exclusive (n=3)  
 3' terminus relative to 5' stem of A-loop (n=3)

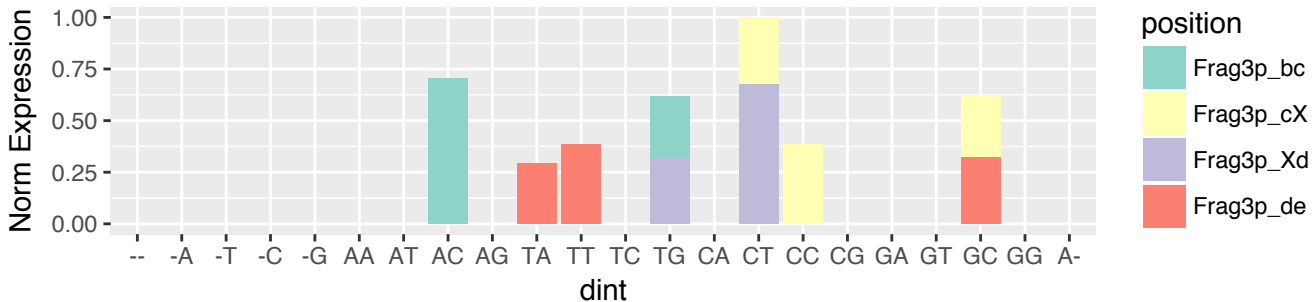

PRAD (n=710)  
 5'-tRF & exclusive (n=100)  
 5' terminus relative to 5' end of the tRNA (n=100)

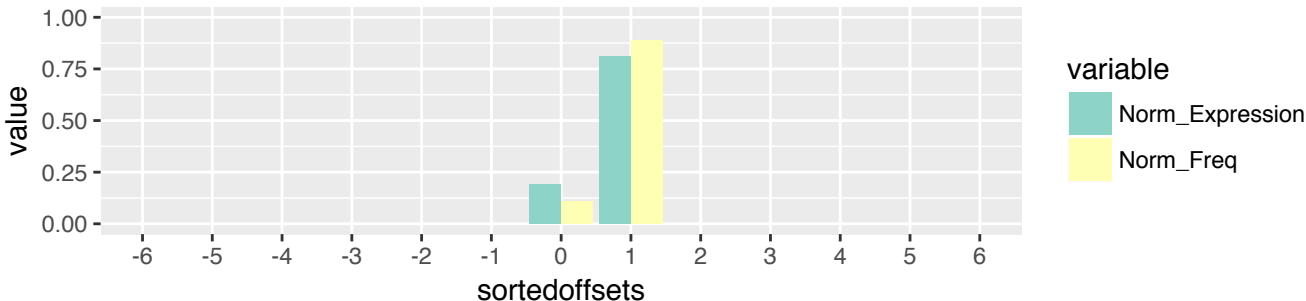

PRAD (n=710)  
 5'-tRF & exclusive (n=100)  
 5' terminus relative to 5' end of the tRNA (n=100)

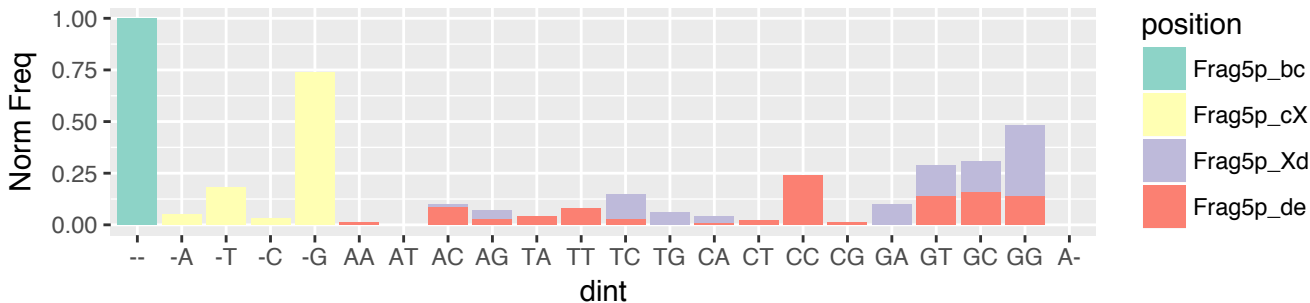

PRAD (n=710)  
 5'-tRF & exclusive (n=100)  
 5' terminus relative to 5' end of the tRNA (n=100)

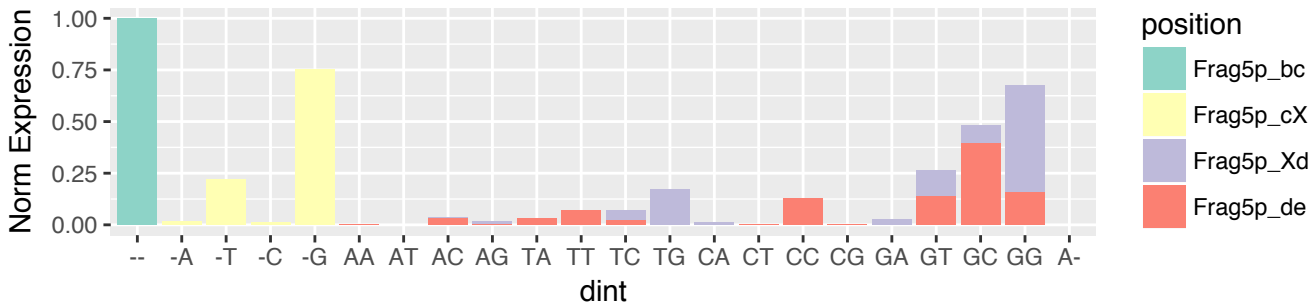



PRAD (n=710)  
 5'-tRF & exclusive (n=100)  
 3' terminus relative to 5' stem of D-loop (n=4)

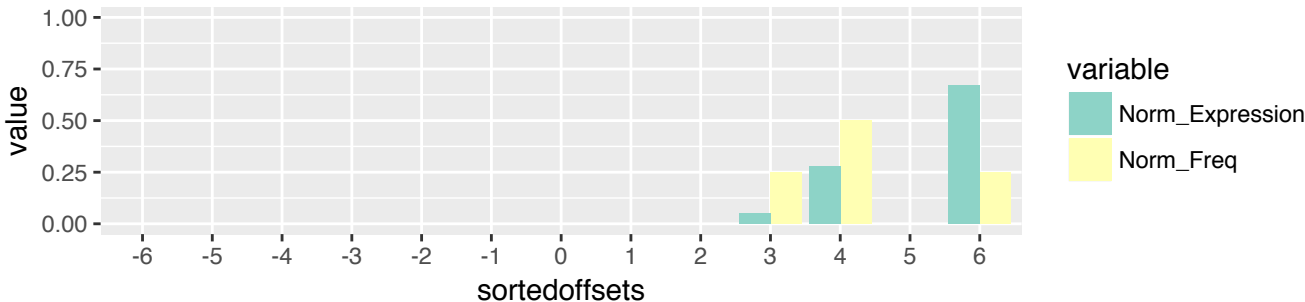

PRAD (n=710)  
 5'-tRF & exclusive (n=100)  
 3' terminus relative to 5' stem of D-loop (n=4)

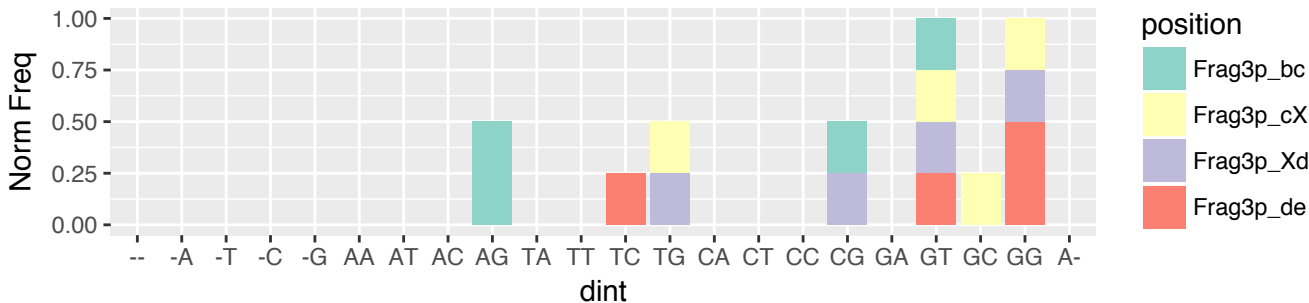

PRAD (n=710)  
 5'-tRF & exclusive (n=100)  
 3' terminus relative to 5' stem of D-loop (n=4)

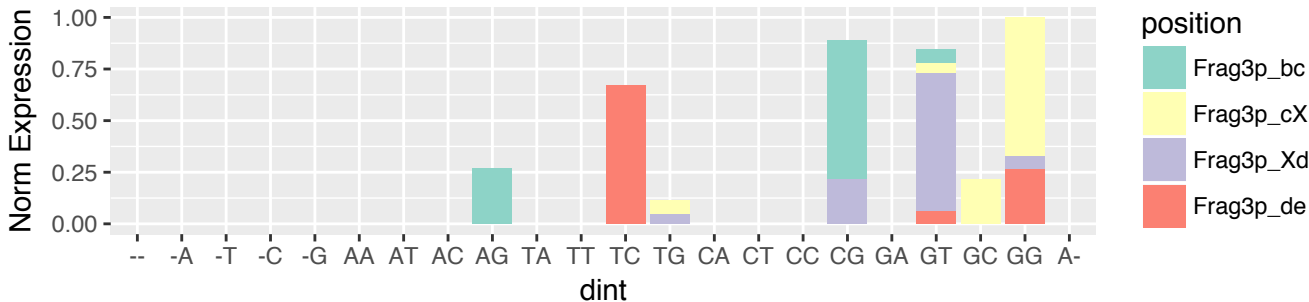

PRAD (n=710)  
 5'-tRF & exclusive (n=100)  
 3' terminus relative to 3' stem of D-loop (n=90)

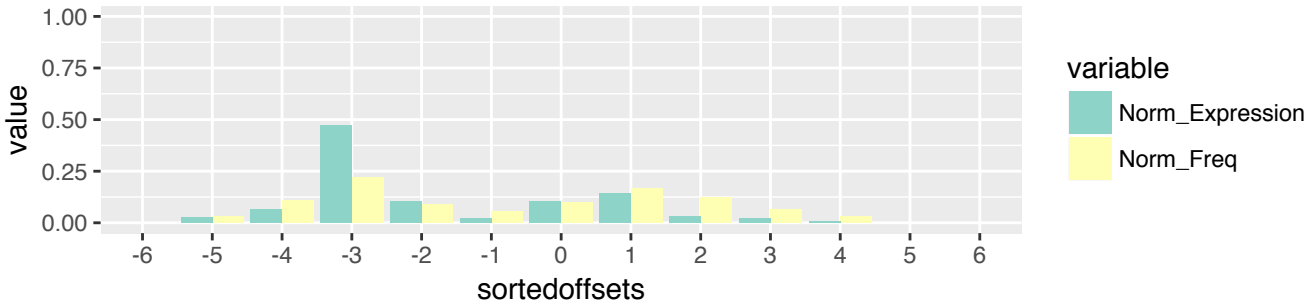

PRAD (n=710)  
 5'-tRF & exclusive (n=100)  
 3' terminus relative to 3' stem of D-loop (n=90)

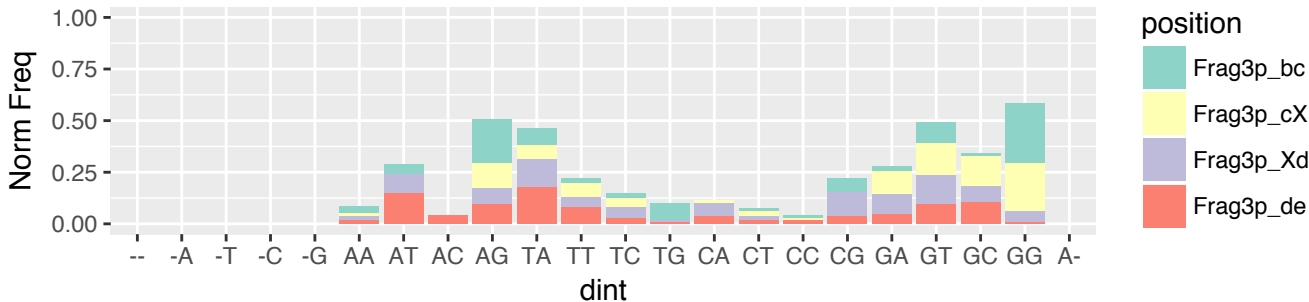

PRAD (n=710)  
 5'-tRF & exclusive (n=100)  
 3' terminus relative to 3' stem of D-loop (n=90)

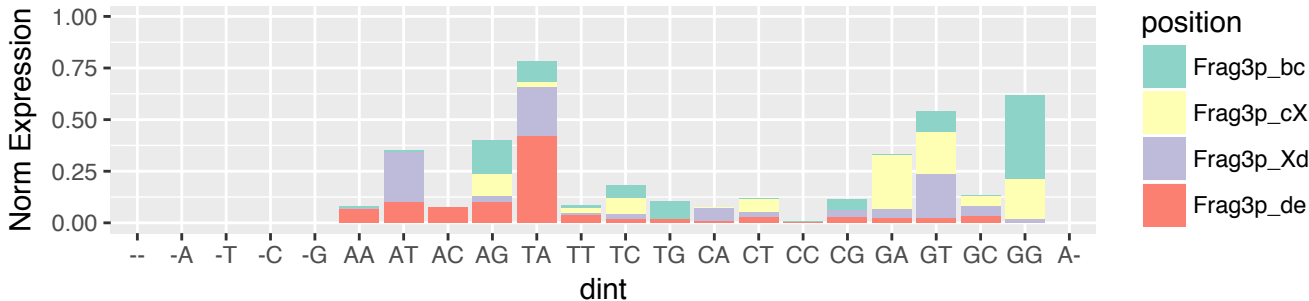

PRAD (n=710)  
 5'-tRF & exclusive (n=100)  
 3' terminus relative to 5' stem of A-loop (n=3)

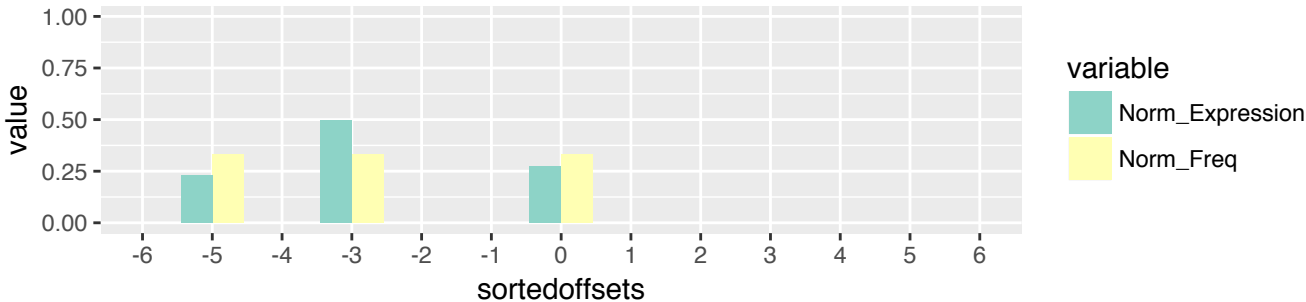

PRAD (n=710)  
 5'-tRF & exclusive (n=100)  
 3' terminus relative to 5' stem of A-loop (n=3)

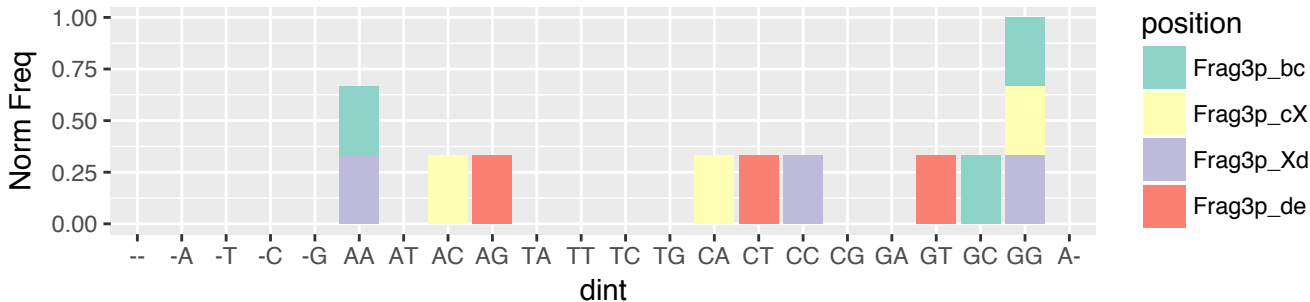

PRAD (n=710)  
 5'-tRF & exclusive (n=100)  
 3' terminus relative to 5' stem of A-loop (n=3)

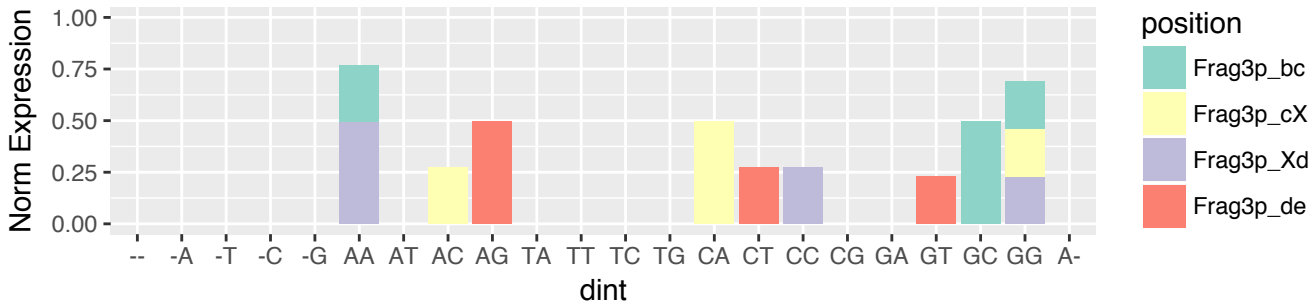

PRAD (n=710)  
 5'-tRF & exclusive (n=100)  
 3' terminus relative to 3' stem of A-loop (n=3)

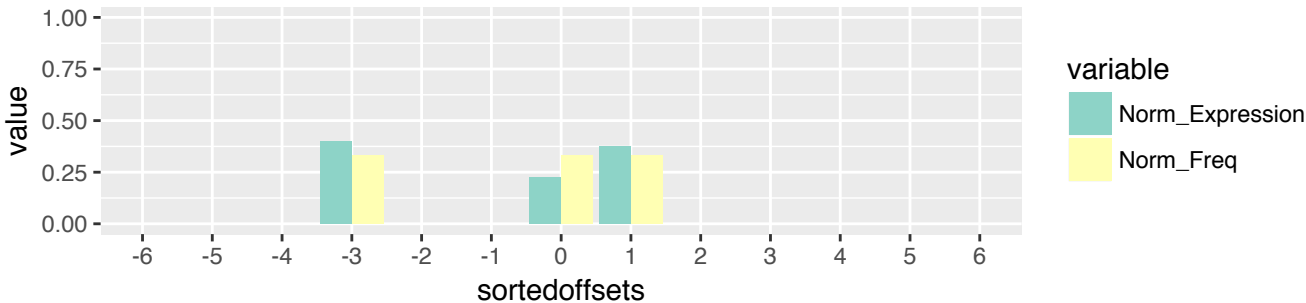

PRAD (n=710)  
 5'-tRF & exclusive (n=100)  
 3' terminus relative to 3' stem of A-loop (n=3)

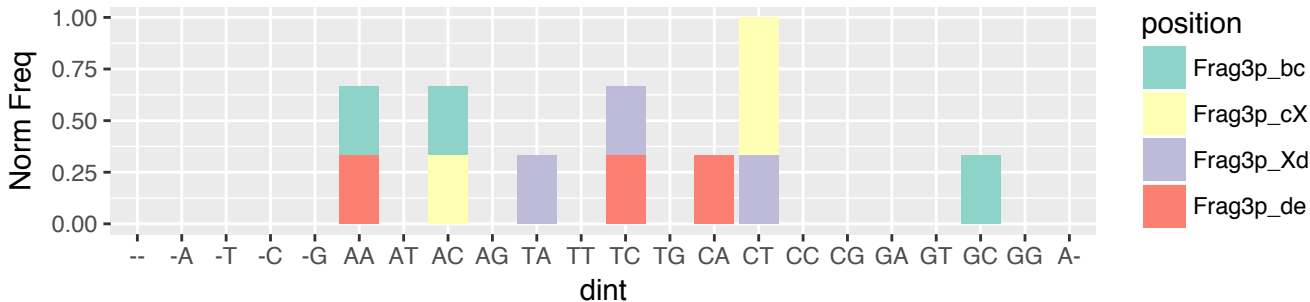

PRAD (n=710)  
 5'-tRF & exclusive (n=100)  
 3' terminus relative to 3' stem of A-loop (n=3)

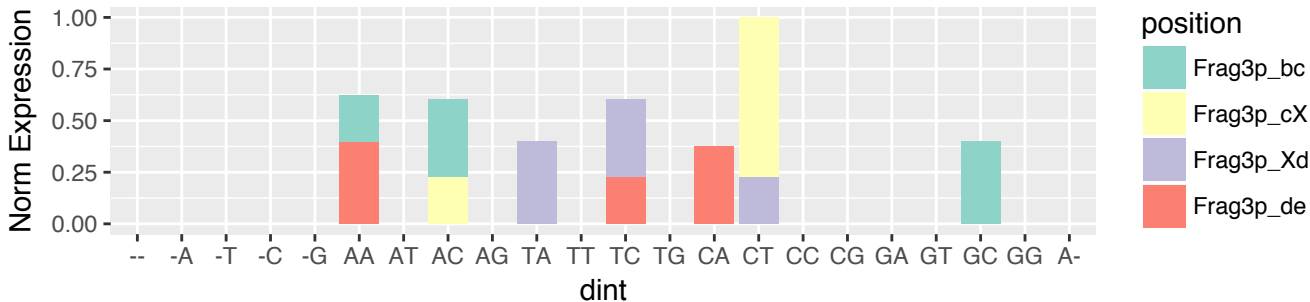

PRAD (n=710)  
 i-tRF & exclusive (n=138)  
 5' terminus relative to 5' stem of D-loop (n=47)

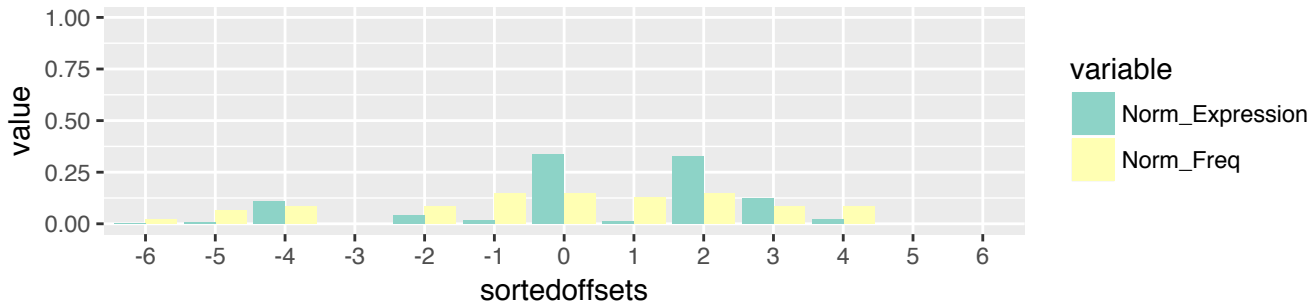

PRAD (n=710)  
 i-tRF & exclusive (n=138)  
 5' terminus relative to 5' stem of D-loop (n=47)

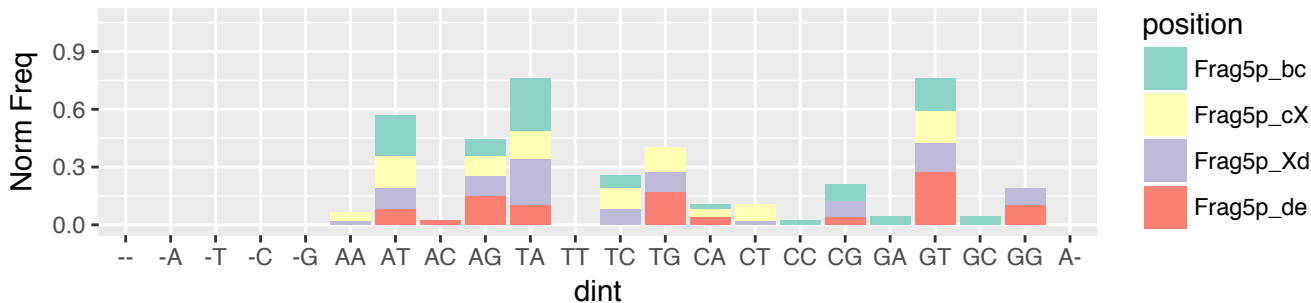

PRAD (n=710)  
 i-tRF & exclusive (n=138)  
 5' terminus relative to 5' stem of D-loop (n=47)

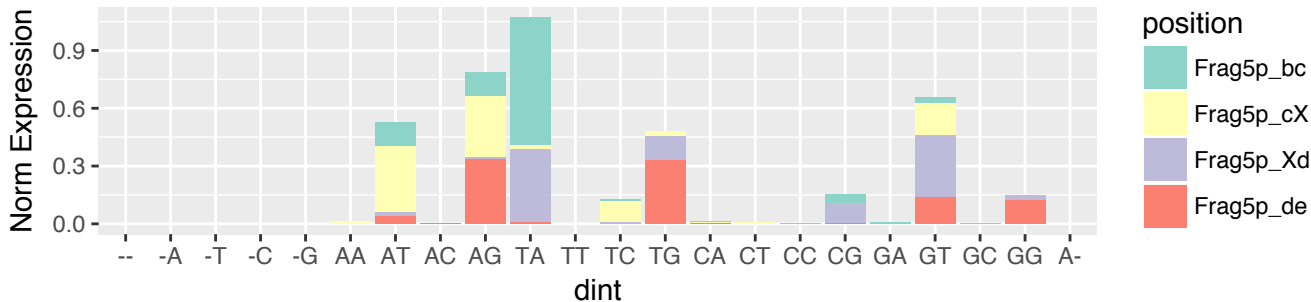

PRAD (n=710)  
 i-tRF & exclusive (n=138)  
 5' terminus relative to 3' stem of D-loop (n=7)

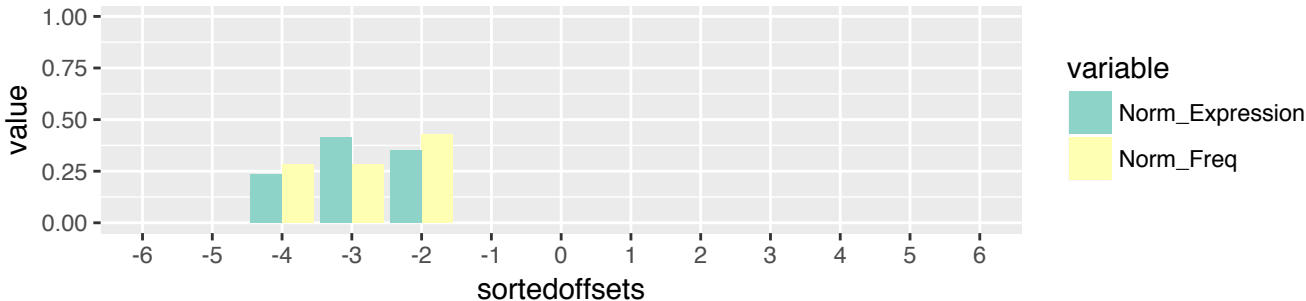

PRAD (n=710)  
 i-tRF & exclusive (n=138)  
 5' terminus relative to 3' stem of D-loop (n=7)

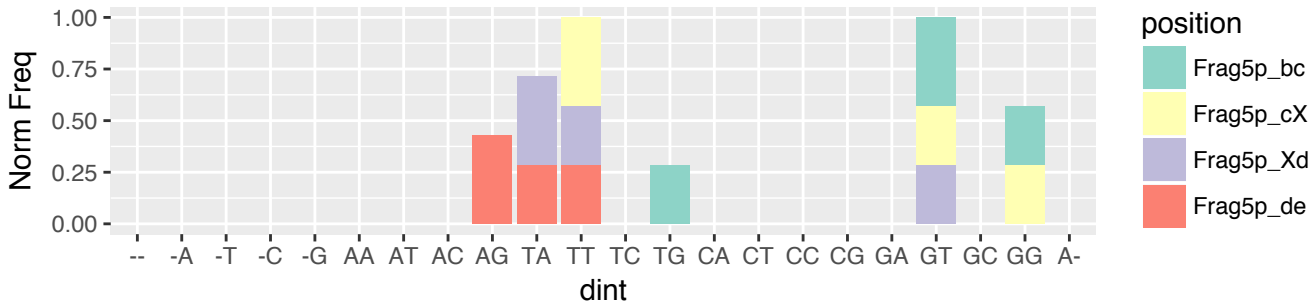

PRAD (n=710)  
 i-tRF & exclusive (n=138)  
 5' terminus relative to 3' stem of D-loop (n=7)

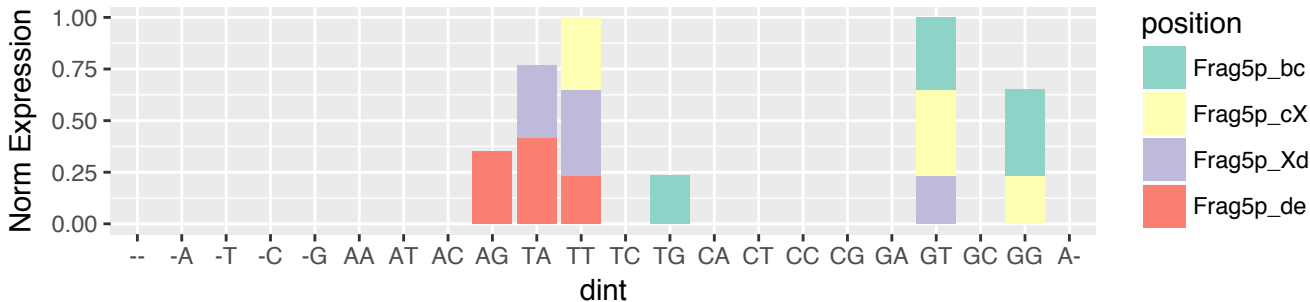

PRAD (n=710)  
 i-tRF & exclusive (n=138)  
 5' terminus relative to 5' stem of A-loop (n=3)

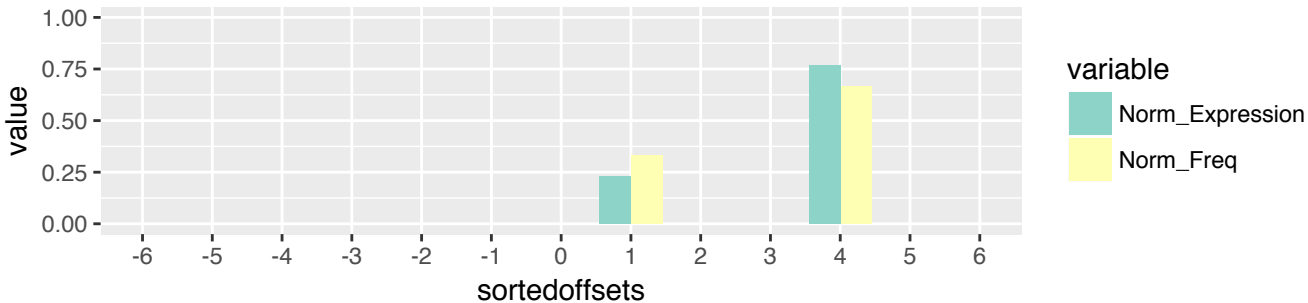

PRAD (n=710)  
 i-tRF & exclusive (n=138)  
 5' terminus relative to 5' stem of A-loop (n=3)

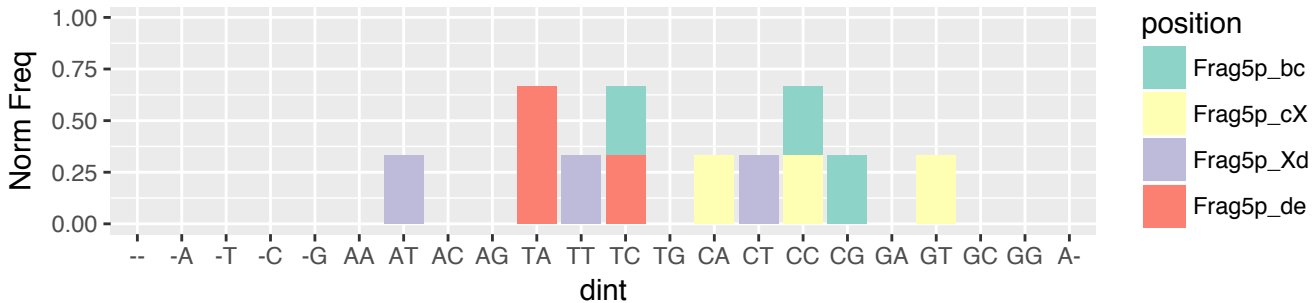

PRAD (n=710)  
 i-tRF & exclusive (n=138)  
 5' terminus relative to 5' stem of A-loop (n=3)

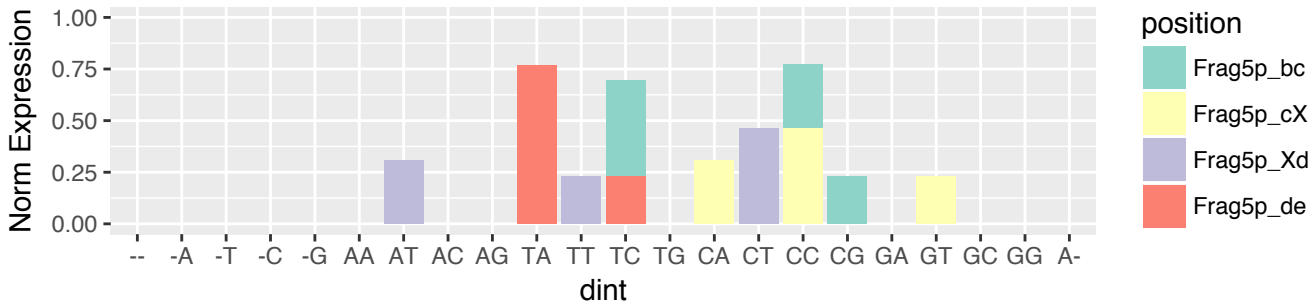

PRAD (n=710)  
i-tRF & exclusive (n=138)  
5' terminus relative to 3' stem of A-loop (n=62)

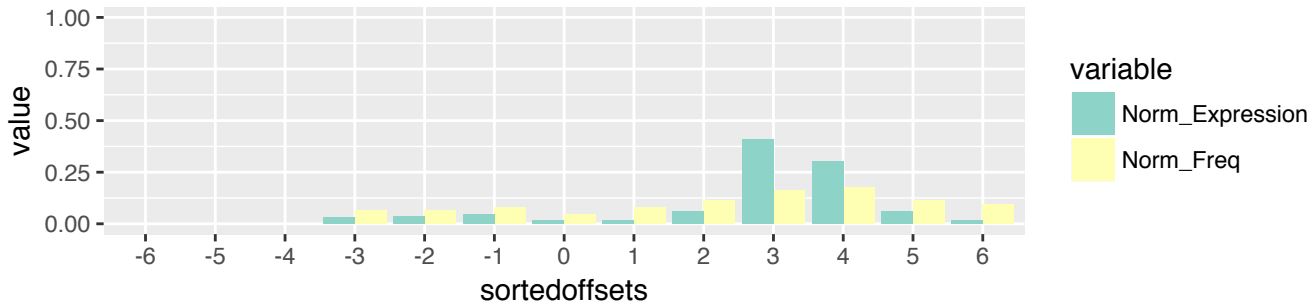

PRAD (n=710)  
i-tRF & exclusive (n=138)  
5' terminus relative to 3' stem of A-loop (n=62)

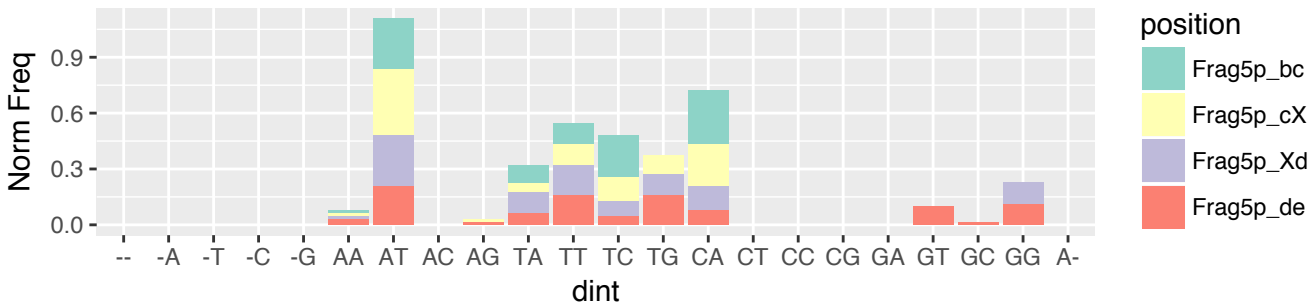

PRAD (n=710)  
i-tRF & exclusive (n=138)  
5' terminus relative to 3' stem of A-loop (n=62)

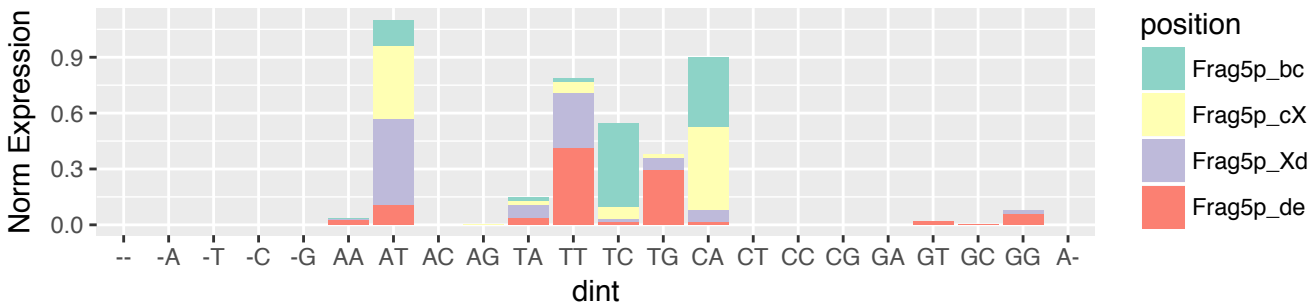



PRAD (n=710)  
i-tRF & exclusive (n=138)  
5' terminus relative to 5' stem of T-loop (n=19)

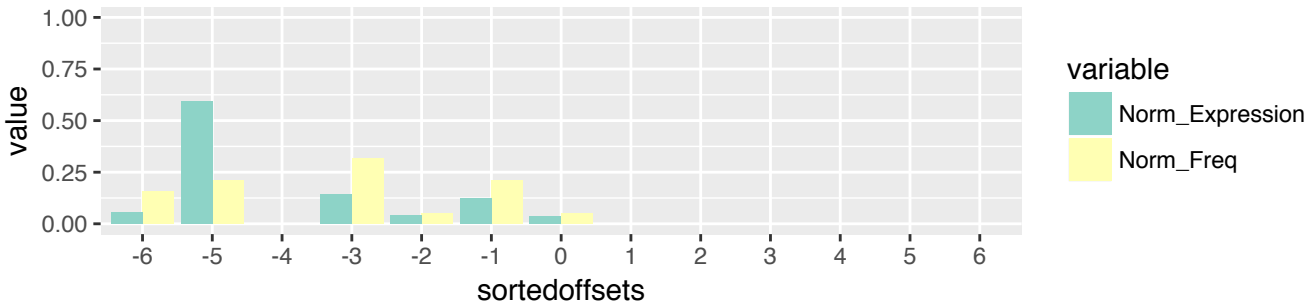

PRAD (n=710)  
i-tRF & exclusive (n=138)  
5' terminus relative to 5' stem of T-loop (n=19)

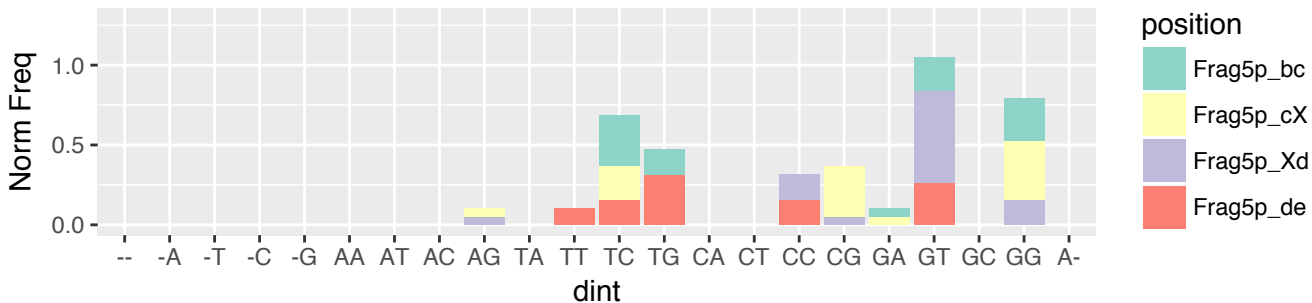

PRAD (n=710)  
i-tRF & exclusive (n=138)  
5' terminus relative to 5' stem of T-loop (n=19)

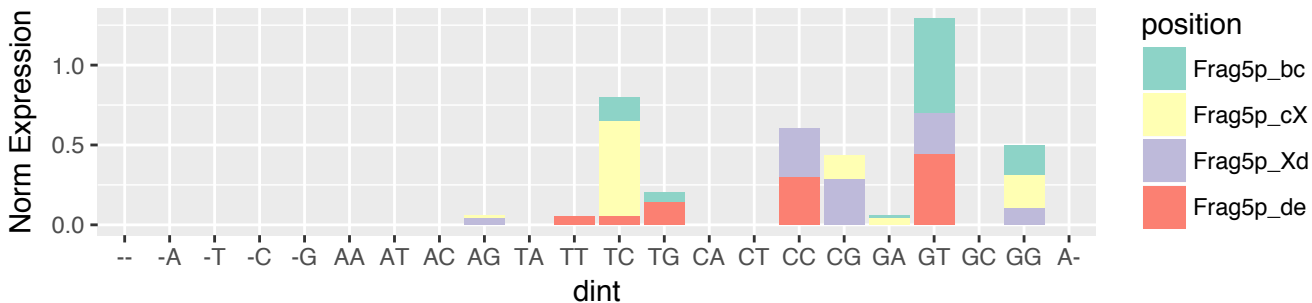

PRAD (n=710)  
i-tRF & exclusive (n=138)  
3' terminus relative to 5' stem of A-loop (n=46)

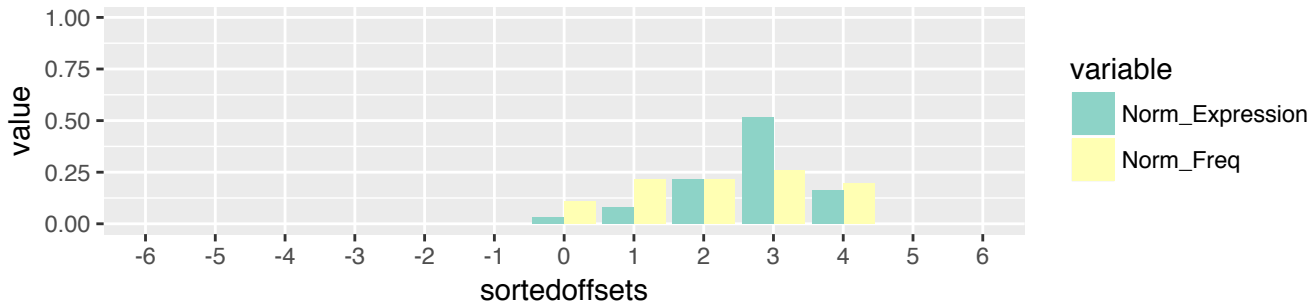

PRAD (n=710)  
i-tRF & exclusive (n=138)  
3' terminus relative to 5' stem of A-loop (n=46)

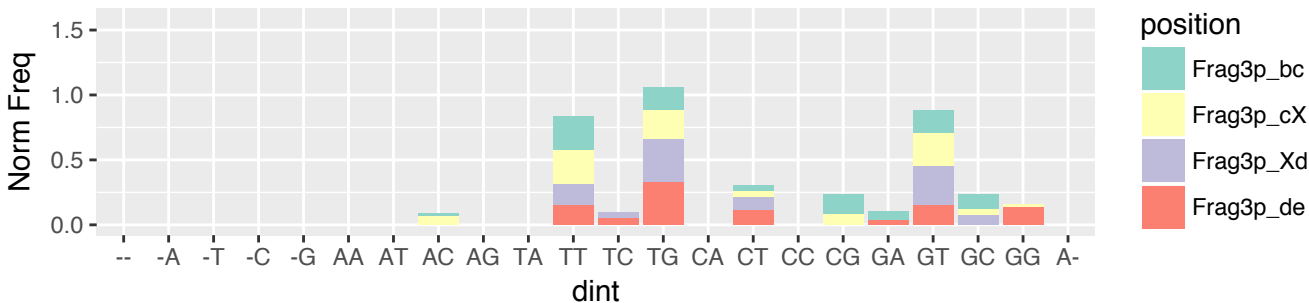

PRAD (n=710)  
i-tRF & exclusive (n=138)  
3' terminus relative to 5' stem of A-loop (n=46)

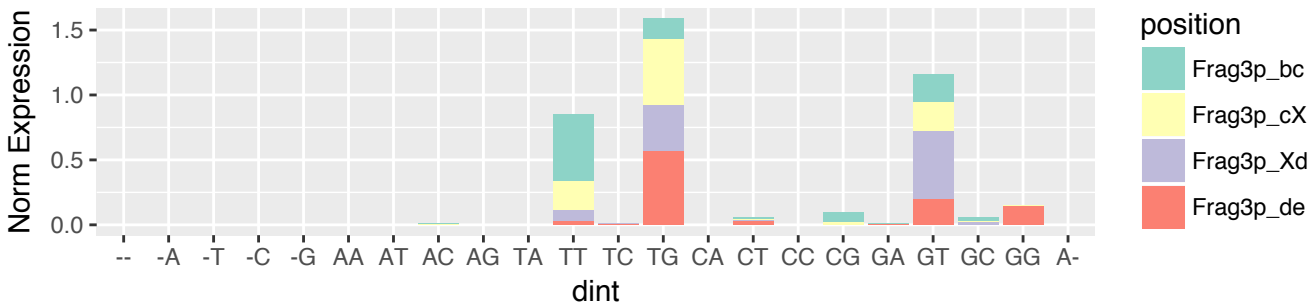

PRAD (n=710)  
 i-tRF & exclusive (n=138)  
 3' terminus relative to 3' stem of A-loop (n=9)

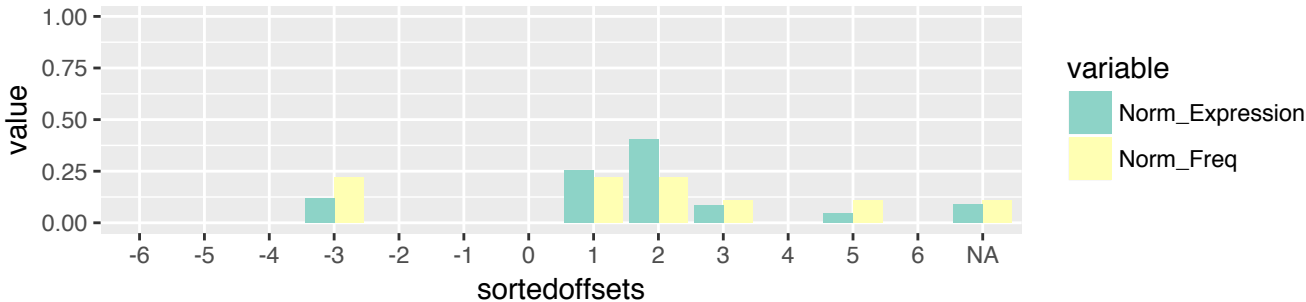

PRAD (n=710)  
 i-tRF & exclusive (n=138)  
 3' terminus relative to 3' stem of A-loop (n=9)

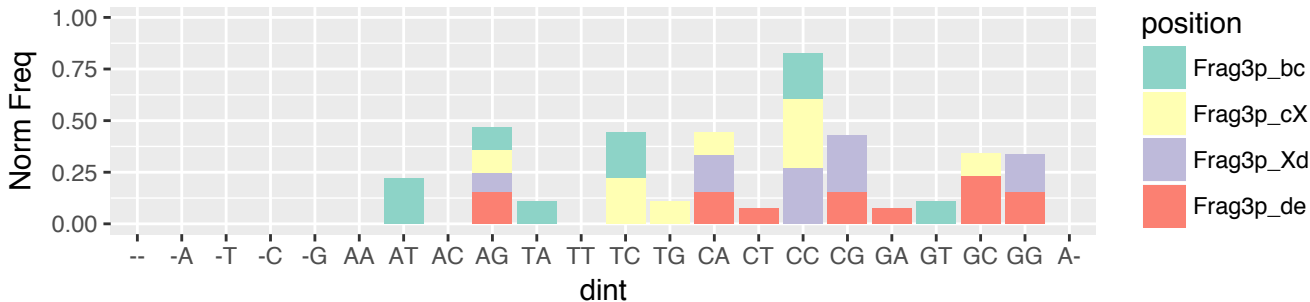

PRAD (n=710)  
 i-tRF & exclusive (n=138)  
 3' terminus relative to 3' stem of A-loop (n=9)

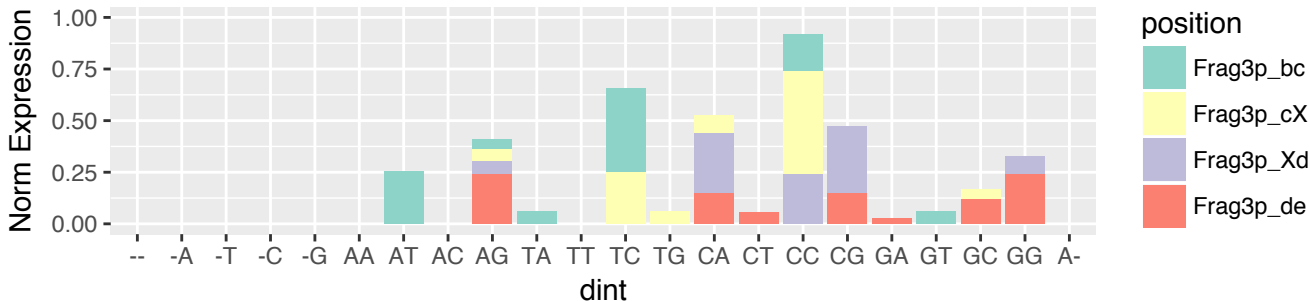

PRAD (n=710)  
i-tRF & exclusive (n=138)  
3' terminus relative to 5' stem of T-loop (n=4)

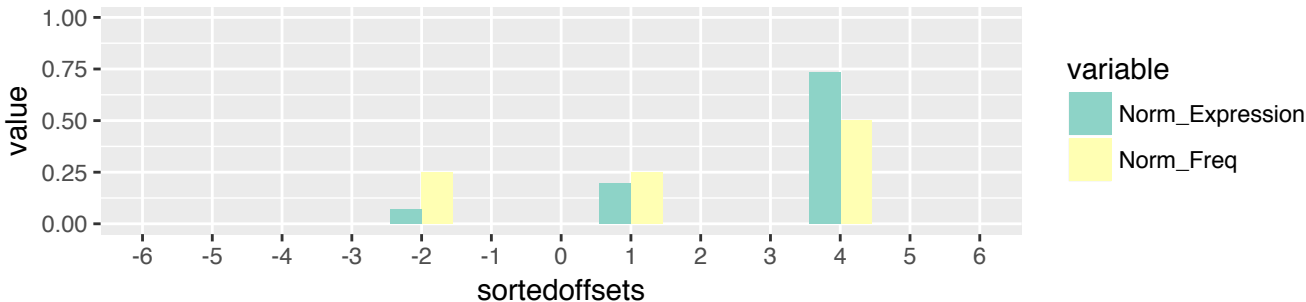

PRAD (n=710)  
i-tRF & exclusive (n=138)  
3' terminus relative to 5' stem of T-loop (n=4)

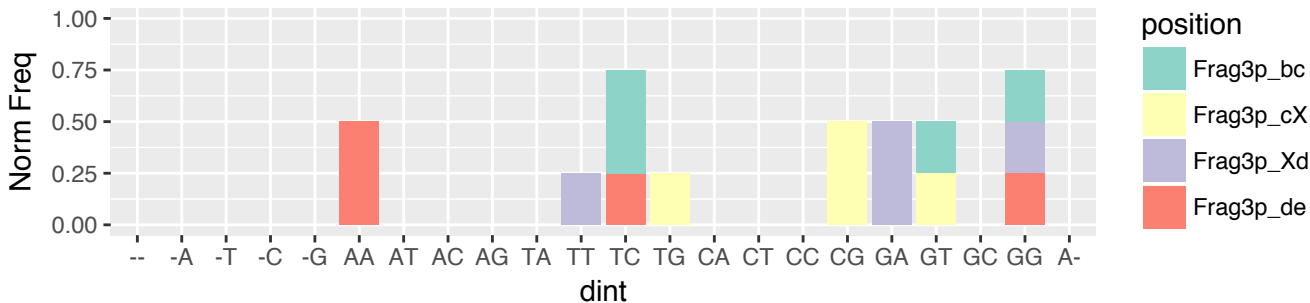

PRAD (n=710)  
i-tRF & exclusive (n=138)  
3' terminus relative to 5' stem of T-loop (n=4)

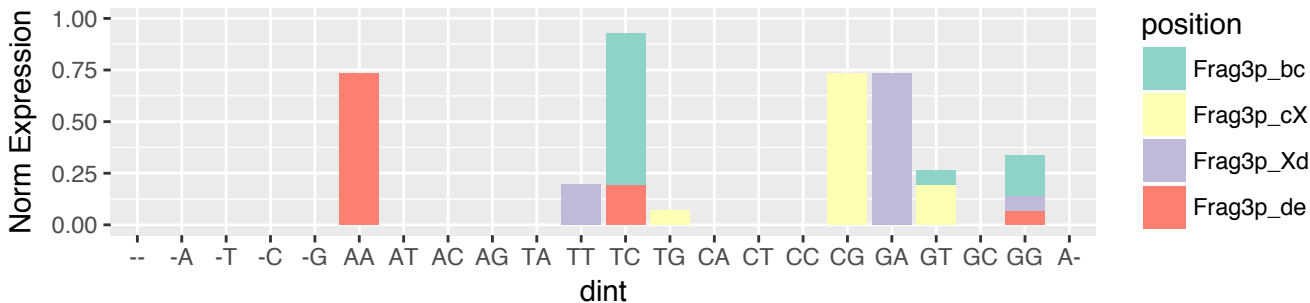

PRAD (n=710)  
i-tRF & exclusive (n=138)  
3' terminus relative to 3' stem of T-loop (n=53)

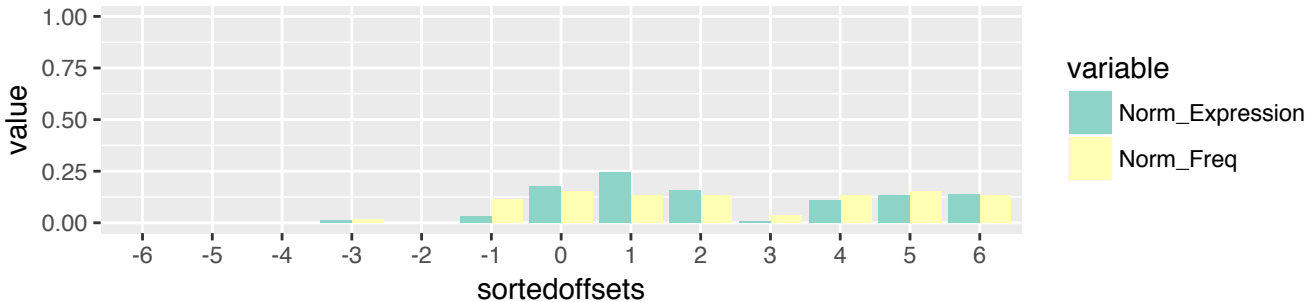

PRAD (n=710)  
i-tRF & exclusive (n=138)  
3' terminus relative to 3' stem of T-loop (n=53)

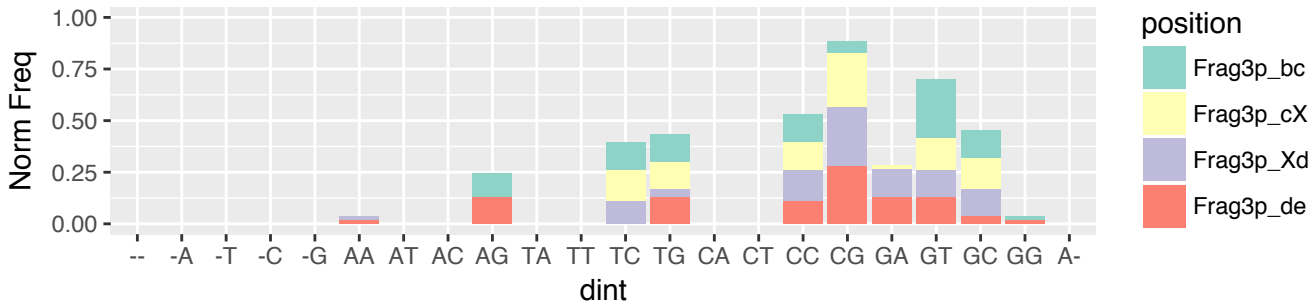

PRAD (n=710)  
i-tRF & exclusive (n=138)  
3' terminus relative to 3' stem of T-loop (n=53)

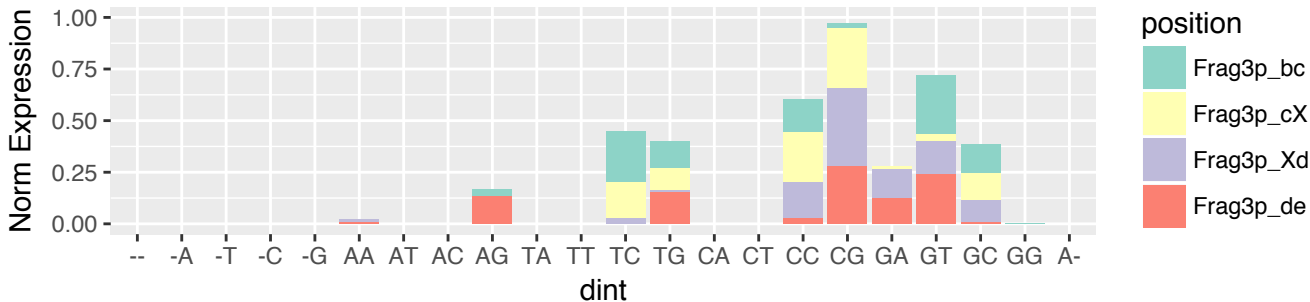

PRAD (n=710)  
 i-tRF & exclusive (n=138)  
 3' terminus relative to 3' end of the tRNA (n=26)

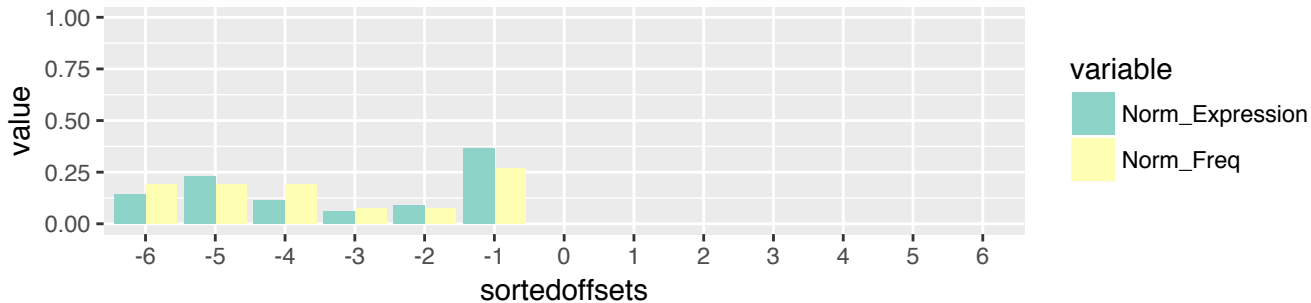

PRAD (n=710)  
 i-tRF & exclusive (n=138)  
 3' terminus relative to 3' end of the tRNA (n=26)

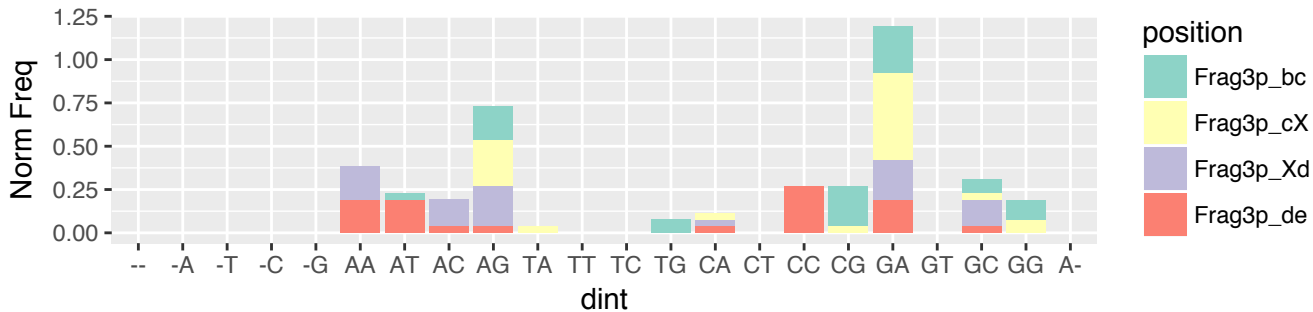

PRAD (n=710)  
 i-tRF & exclusive (n=138)  
 3' terminus relative to 3' end of the tRNA (n=26)

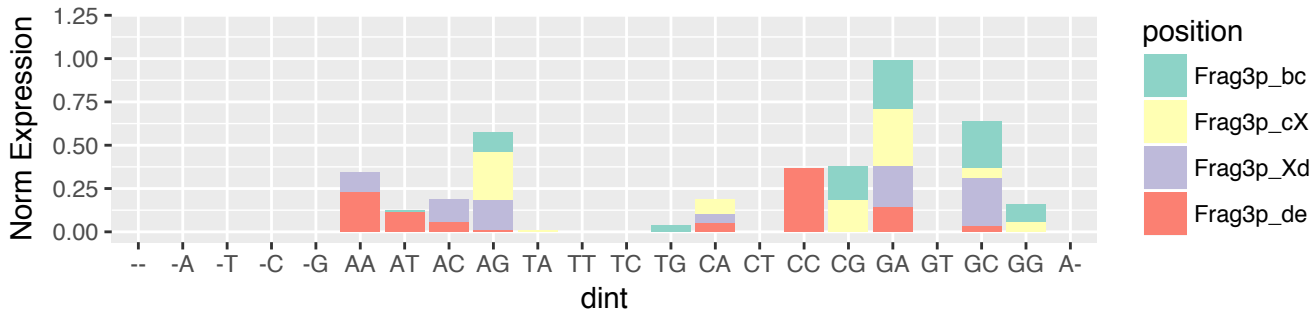

PRAD (n=710)  
 3'-tRF & exclusive (n=143)  
 5' terminus relative to 5' stem of T-loop (n=97)

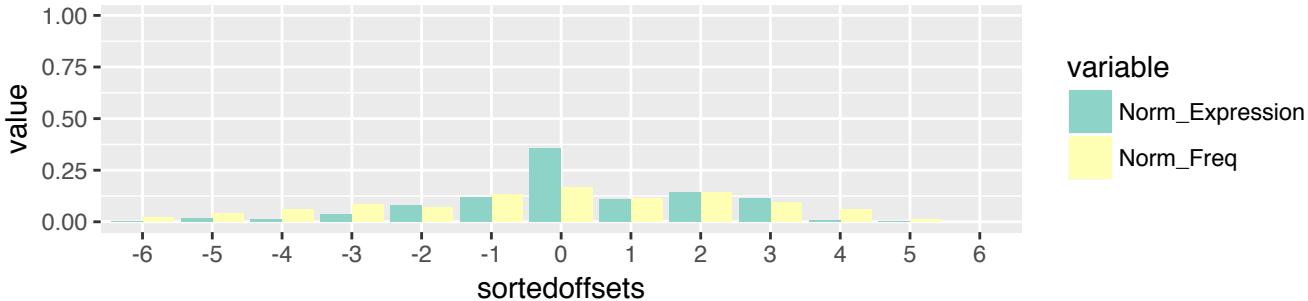

PRAD (n=710)  
 3'-tRF & exclusive (n=143)  
 5' terminus relative to 5' stem of T-loop (n=97)

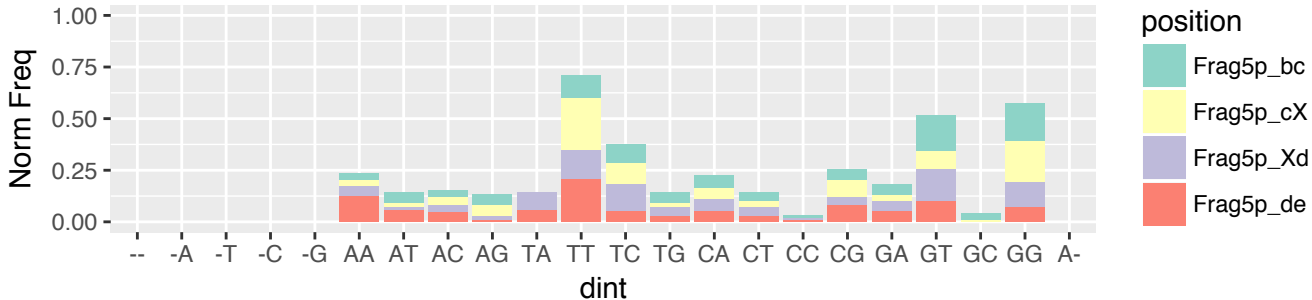

PRAD (n=710)  
 3'-tRF & exclusive (n=143)  
 5' terminus relative to 5' stem of T-loop (n=97)

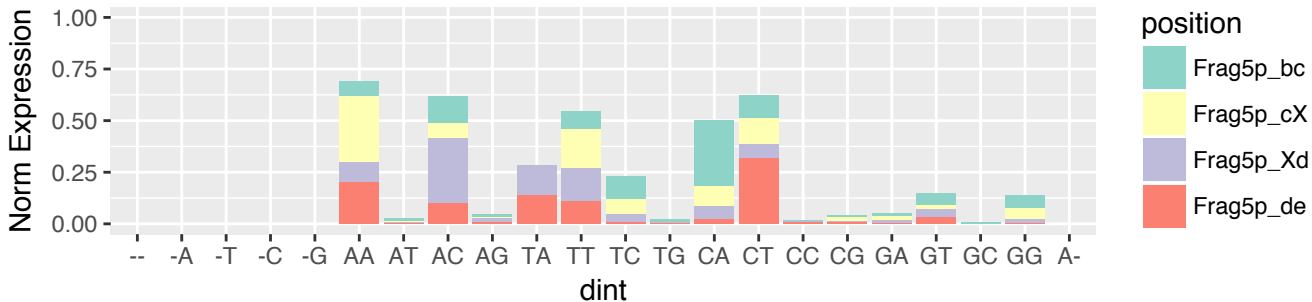

PRAD (n=710)  
 3'-tRF & exclusive (n=143)  
 5' terminus relative to 3' stem of T-loop (n=46)

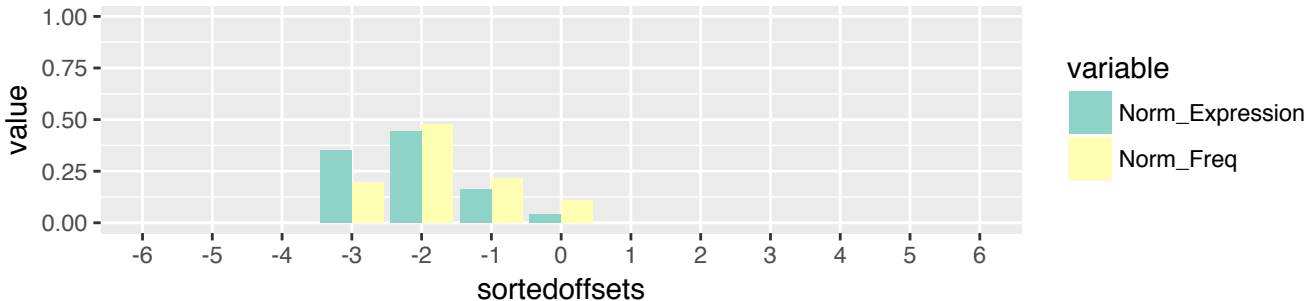

PRAD (n=710)  
 3'-tRF & exclusive (n=143)  
 5' terminus relative to 3' stem of T-loop (n=46)

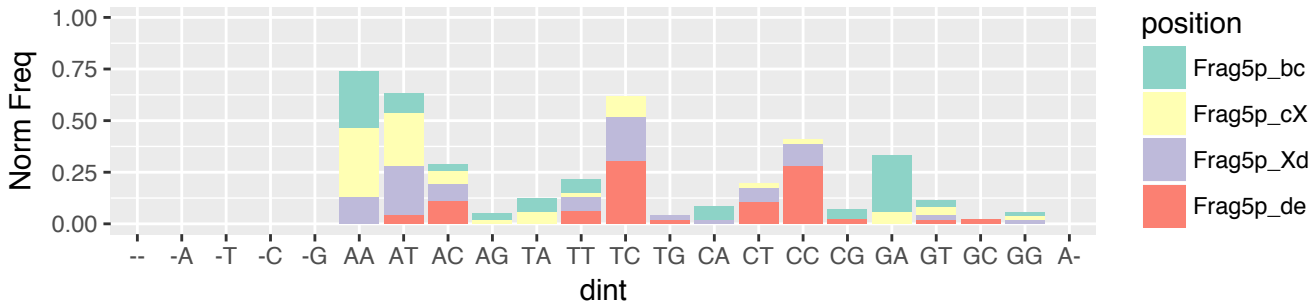

PRAD (n=710)  
 3'-tRF & exclusive (n=143)  
 5' terminus relative to 3' stem of T-loop (n=46)

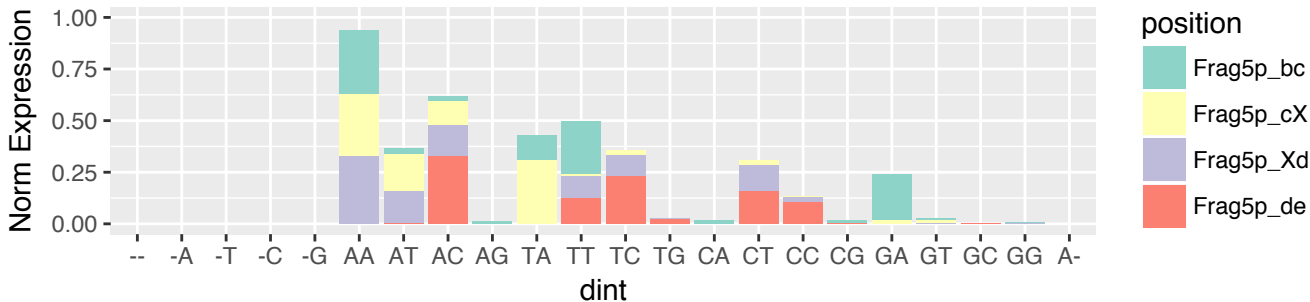



PRAD (n=710)  
 3'-tRF & exclusive (n=143)  
 3' terminus relative to 3' end of the tRNA (n=143)

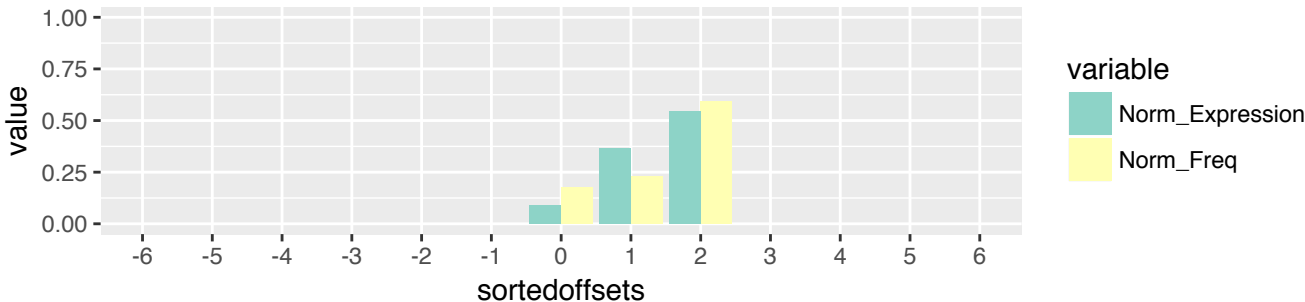

PRAD (n=710)  
 3'-tRF & exclusive (n=143)  
 3' terminus relative to 3' end of the tRNA (n=143)

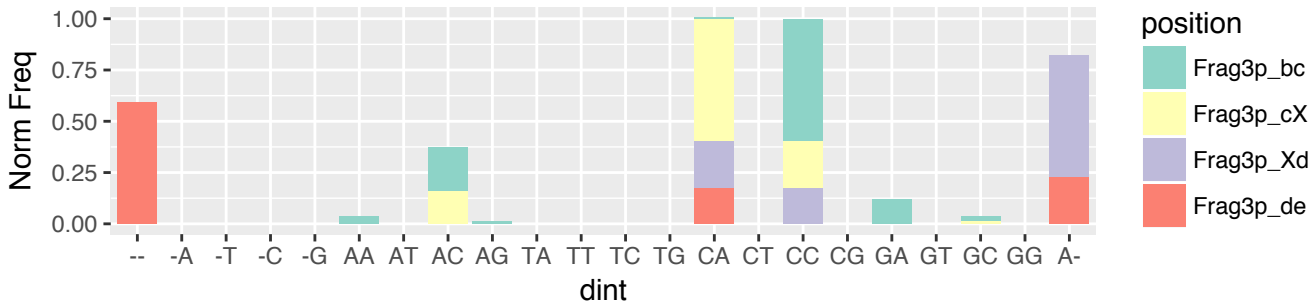

PRAD (n=710)  
 3'-tRF & exclusive (n=143)  
 3' terminus relative to 3' end of the tRNA (n=143)

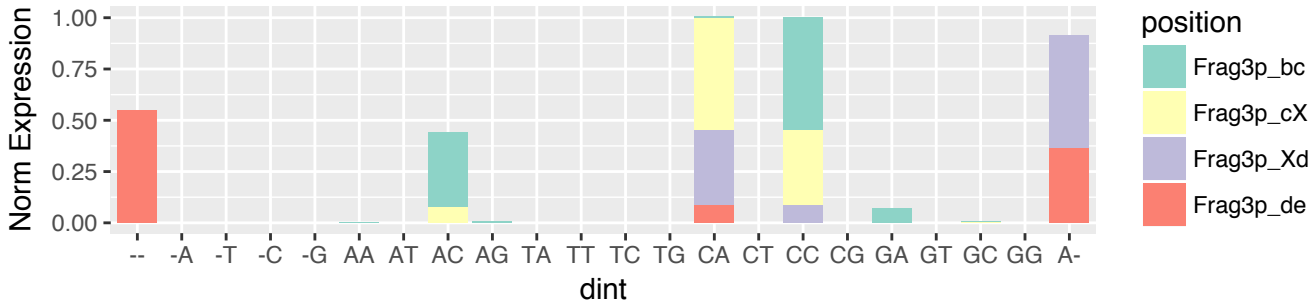

READ (n=1281)  
5'-half & exclusive (n=5)  
5' terminus relative to 5' end of the tRNA (n=5)



READ (n=1281)  
5'-half & exclusive (n=5)  
5' terminus relative to 5' end of the tRNA (n=5)



READ (n=1281)  
5'-half & exclusive (n=5)  
5' terminus relative to 5' end of the tRNA (n=5)

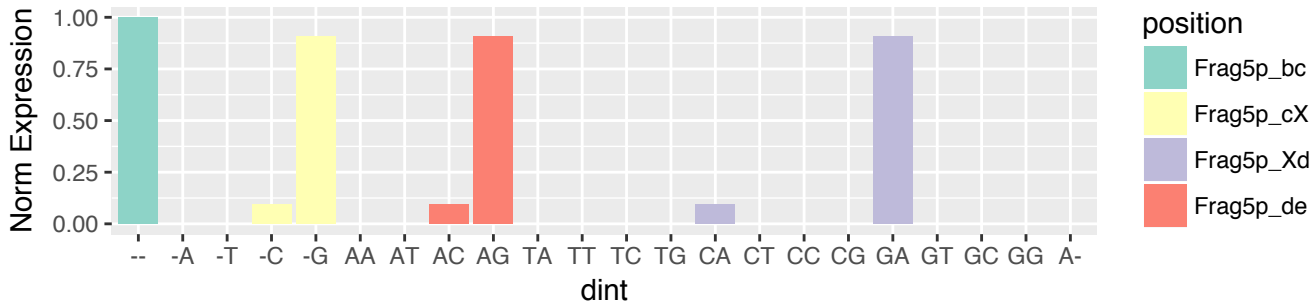

READ (n=1281)  
 5'-half & exclusive (n=5)  
 3' terminus relative to 5' stem of A-loop (n=5)

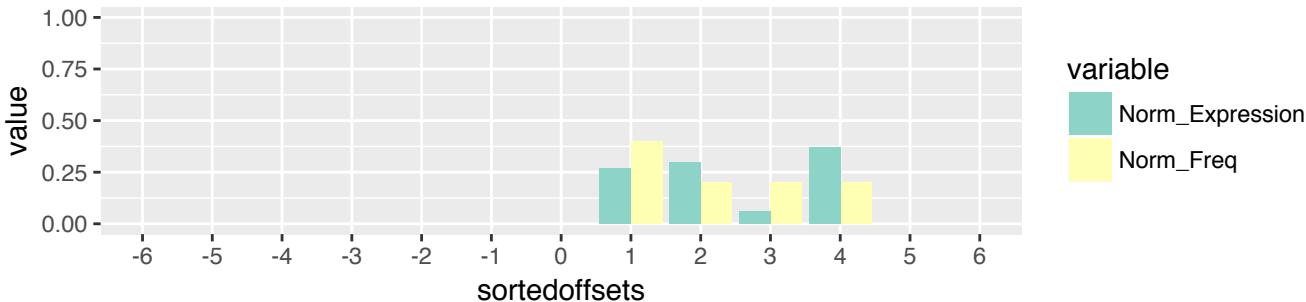

READ (n=1281)  
 5'-half & exclusive (n=5)  
 3' terminus relative to 5' stem of A-loop (n=5)



READ (n=1281)  
 5'-half & exclusive (n=5)  
 3' terminus relative to 5' stem of A-loop (n=5)

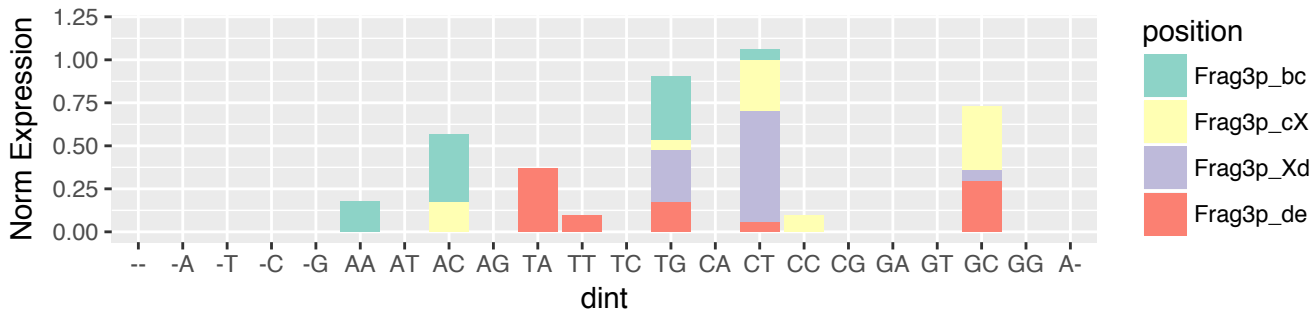

READ (n=1281)  
 5'-tRF & exclusive (n=189)  
 5' terminus relative to 5' end of the tRNA (n=189)

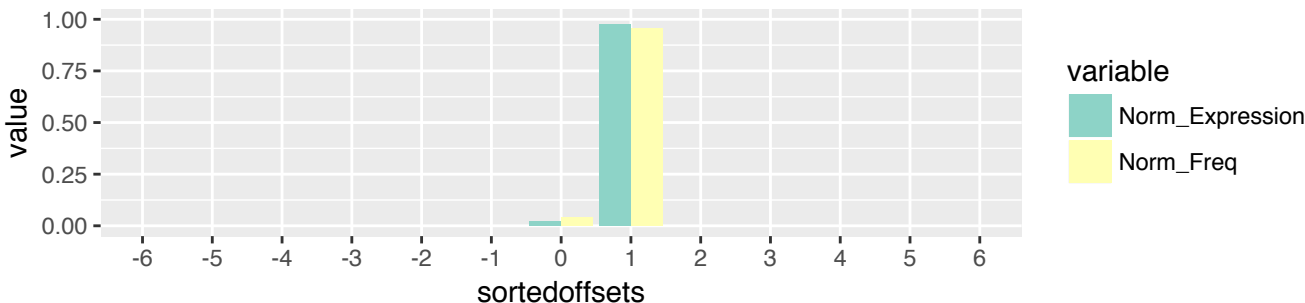

READ (n=1281)  
 5'-tRF & exclusive (n=189)  
 5' terminus relative to 5' end of the tRNA (n=189)

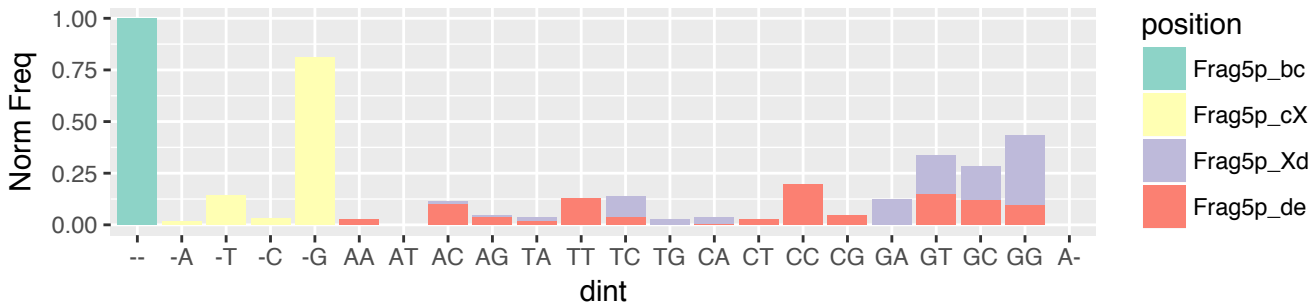

READ (n=1281)  
 5'-tRF & exclusive (n=189)  
 5' terminus relative to 5' end of the tRNA (n=189)

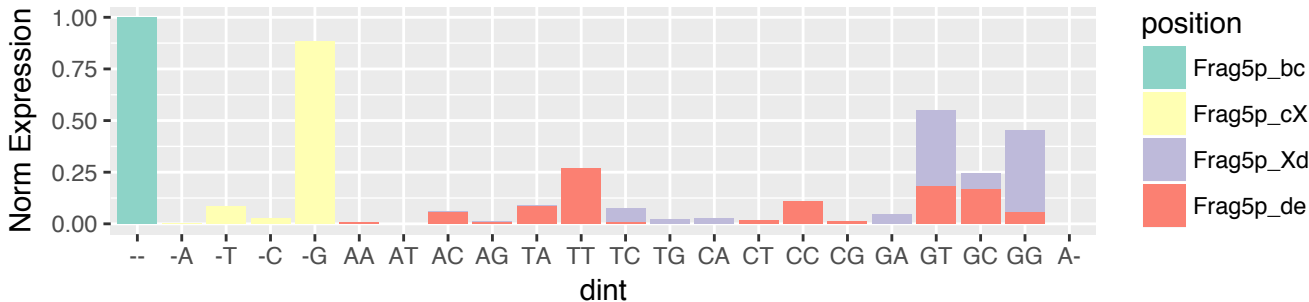

READ (n=1281)  
5'-tRF & exclusive (n=189)  
3' terminus relative to 5' stem of D-loop (n=16)

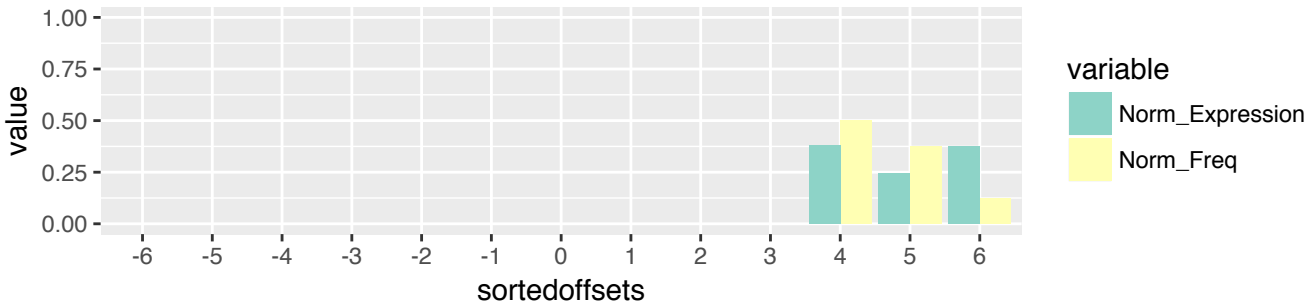

READ (n=1281)  
5'-tRF & exclusive (n=189)  
3' terminus relative to 5' stem of D-loop (n=16)

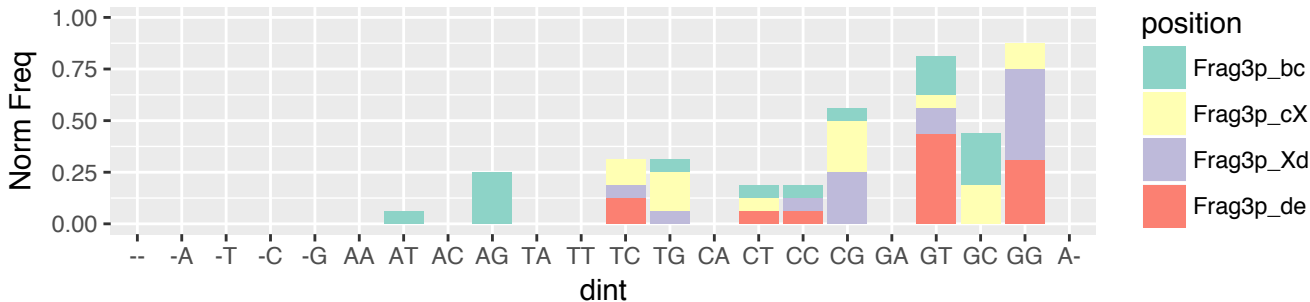

READ (n=1281)  
5'-tRF & exclusive (n=189)  
3' terminus relative to 5' stem of D-loop (n=16)

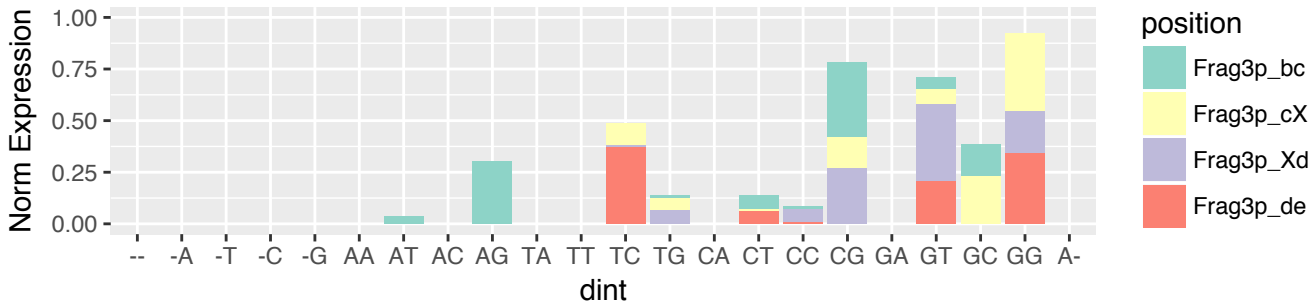

READ (n=1281)  
 5'-tRF & exclusive (n=189)  
 3' terminus relative to 3' stem of D-loop (n=158)

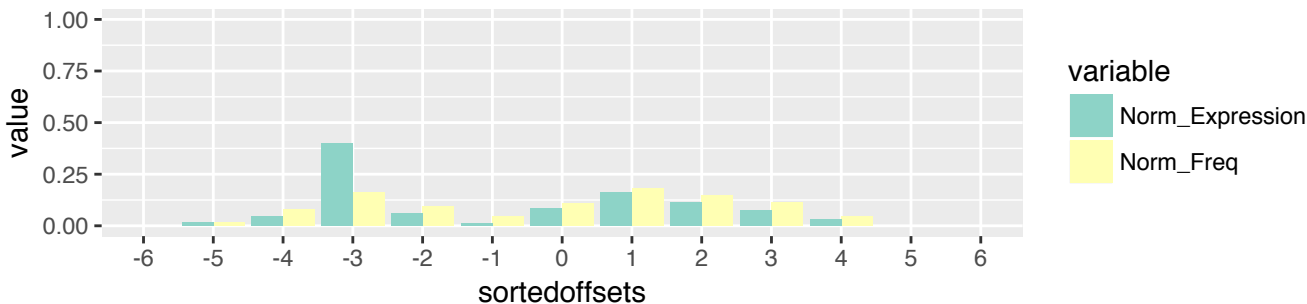

READ (n=1281)  
 5'-tRF & exclusive (n=189)  
 3' terminus relative to 3' stem of D-loop (n=158)

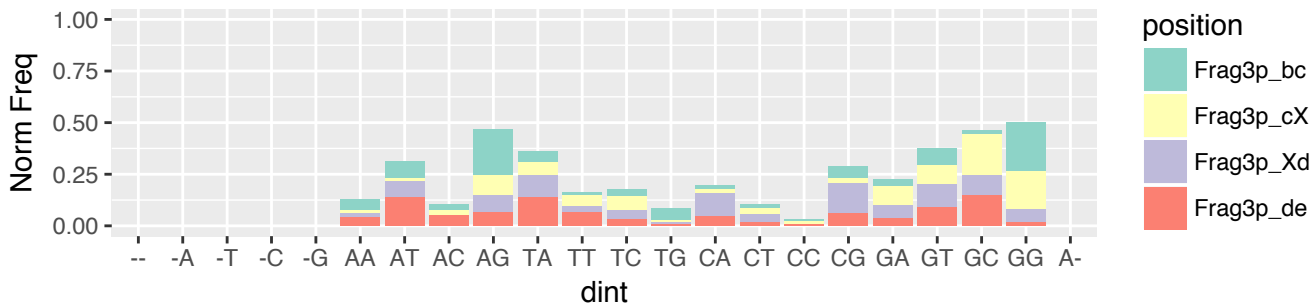

READ (n=1281)  
 5'-tRF & exclusive (n=189)  
 3' terminus relative to 3' stem of D-loop (n=158)

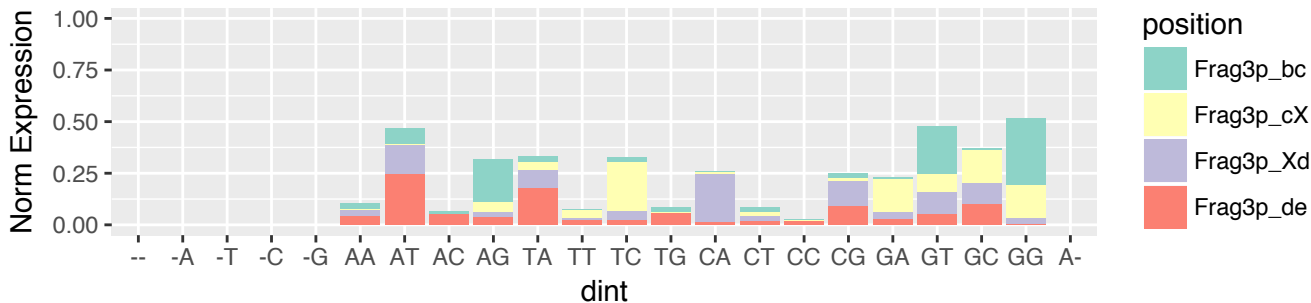

READ (n=1281)  
 5'-tRF & exclusive (n=189)  
 3' terminus relative to 5' stem of A-loop (n=11)

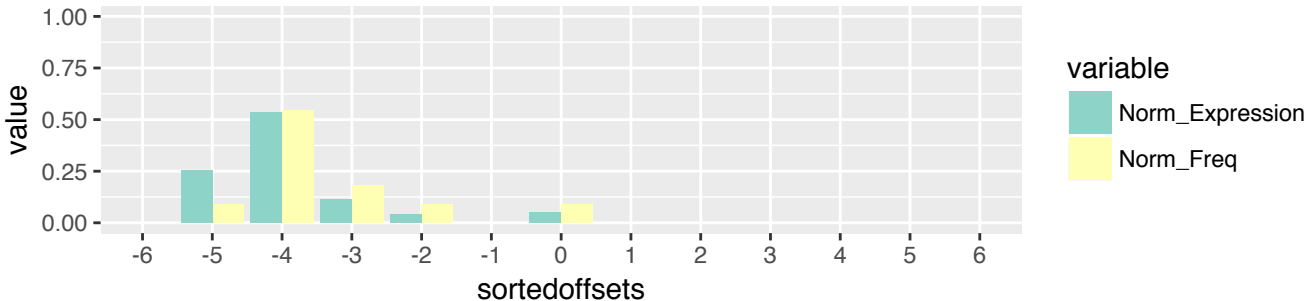

READ (n=1281)  
 5'-tRF & exclusive (n=189)  
 3' terminus relative to 5' stem of A-loop (n=11)

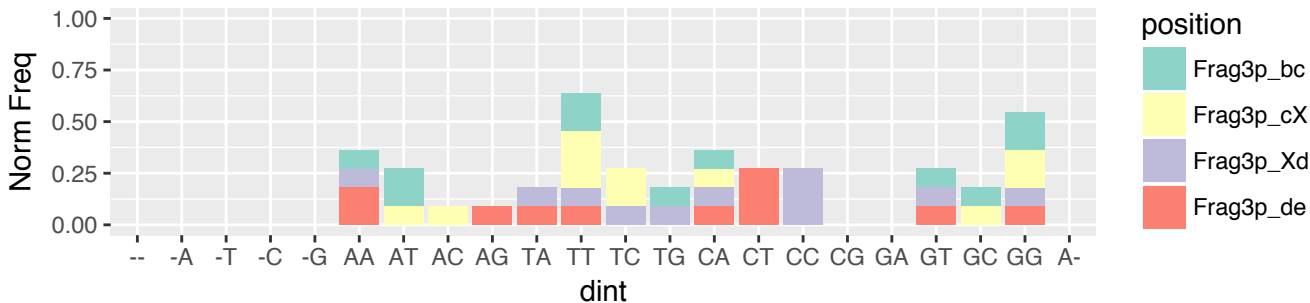

READ (n=1281)  
 5'-tRF & exclusive (n=189)  
 3' terminus relative to 5' stem of A-loop (n=11)

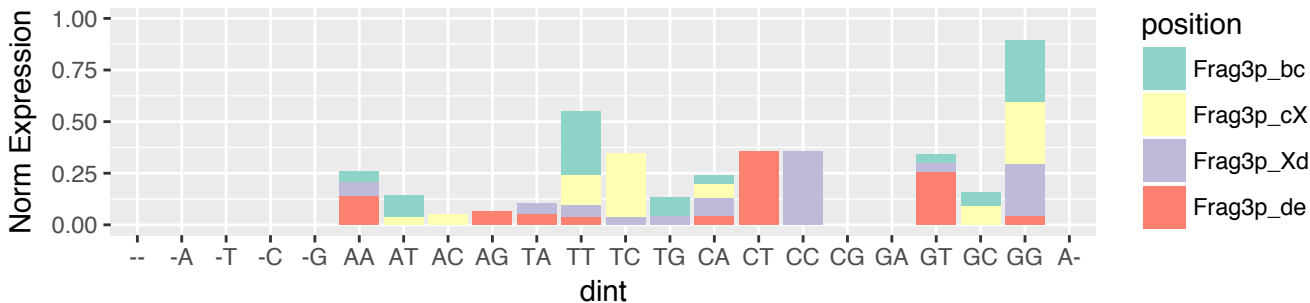

READ (n=1281)  
 5'-tRF & exclusive (n=189)  
 3' terminus relative to 3' stem of A-loop (n=4)

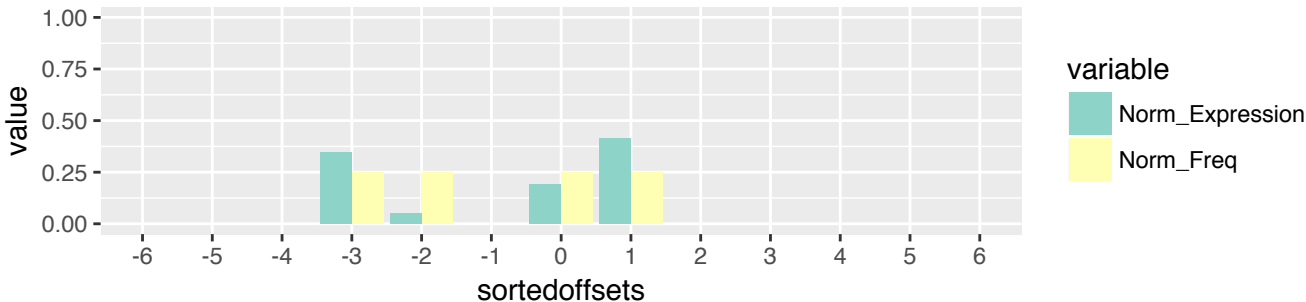

READ (n=1281)  
 5'-tRF & exclusive (n=189)  
 3' terminus relative to 3' stem of A-loop (n=4)

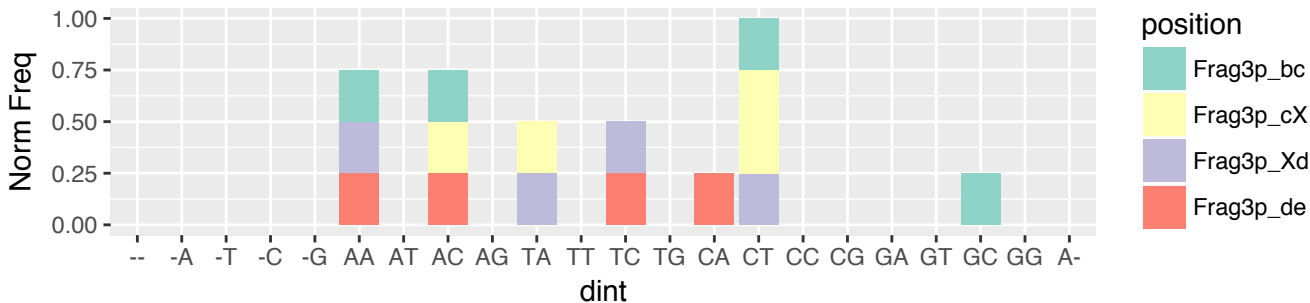

READ (n=1281)  
 5'-tRF & exclusive (n=189)  
 3' terminus relative to 3' stem of A-loop (n=4)

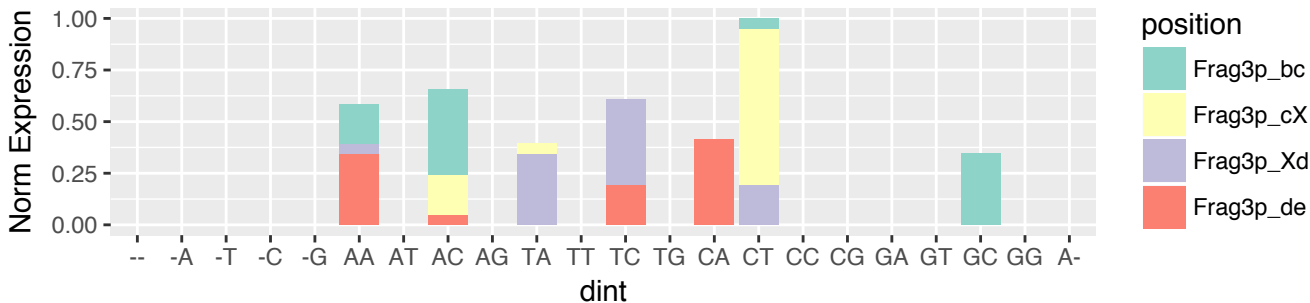



READ (n=1281)  
i-tRF & exclusive (n=272)  
5' terminus relative to 5' end of the tRNA (n=7)

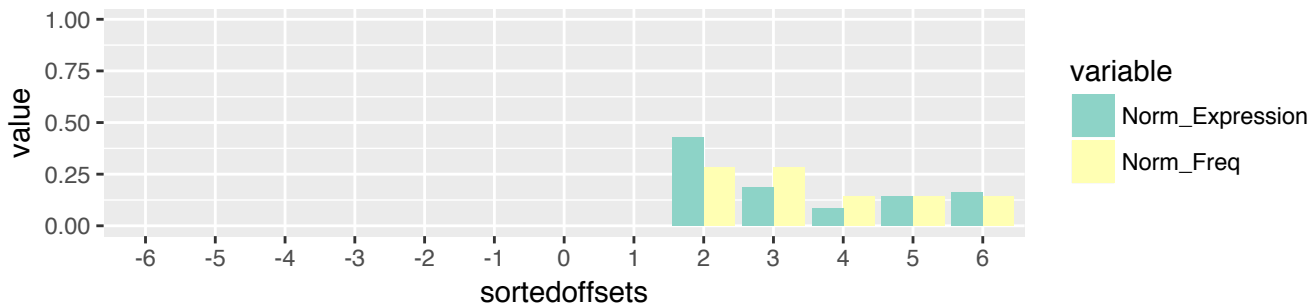

READ (n=1281)  
i-tRF & exclusive (n=272)  
5' terminus relative to 5' end of the tRNA (n=7)

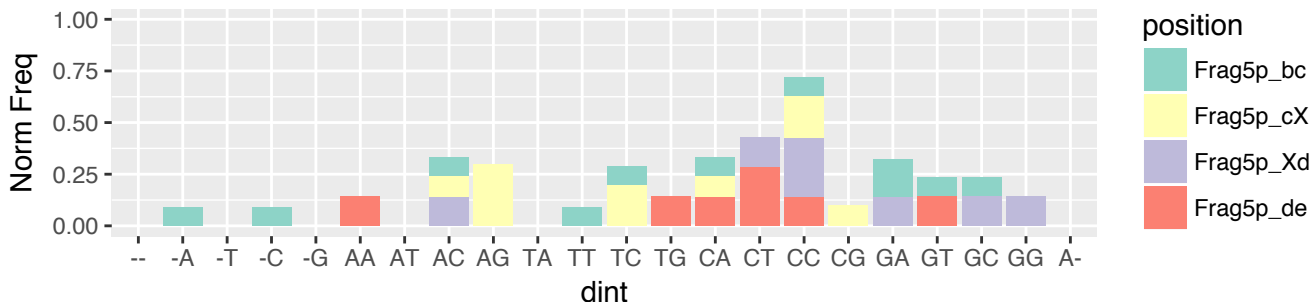

READ (n=1281)  
i-tRF & exclusive (n=272)  
5' terminus relative to 5' end of the tRNA (n=7)

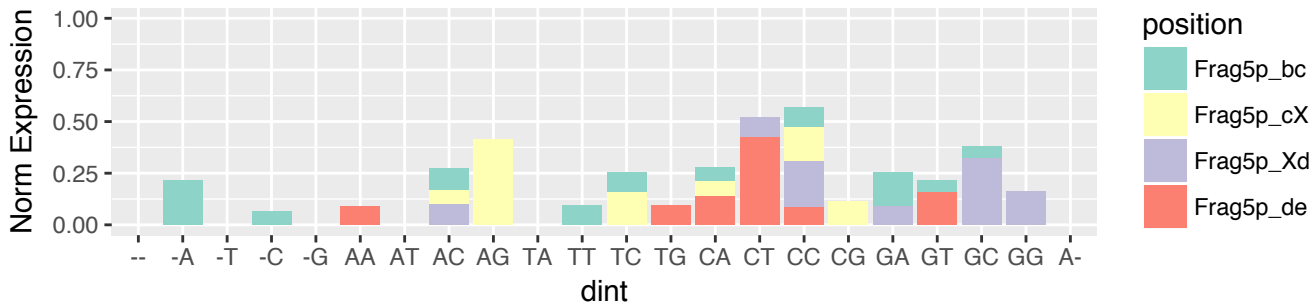

READ (n=1281)  
i-tRF & exclusive (n=272)  
5' terminus relative to 5' stem of D-loop (n=98)

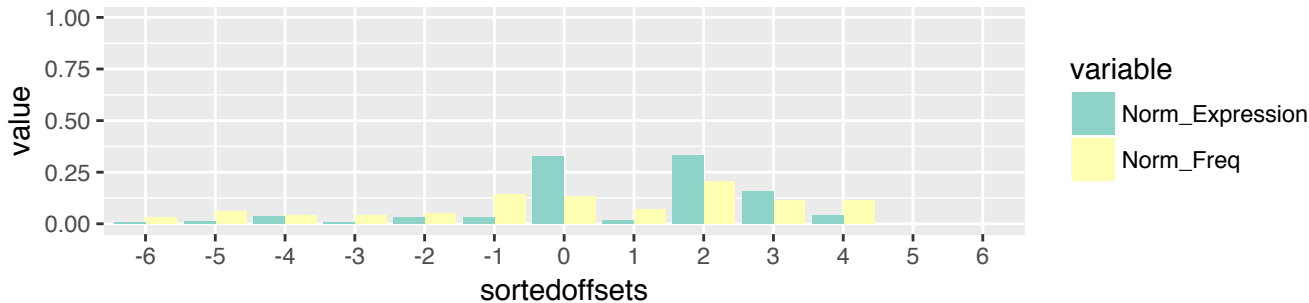

READ (n=1281)  
i-tRF & exclusive (n=272)  
5' terminus relative to 5' stem of D-loop (n=98)

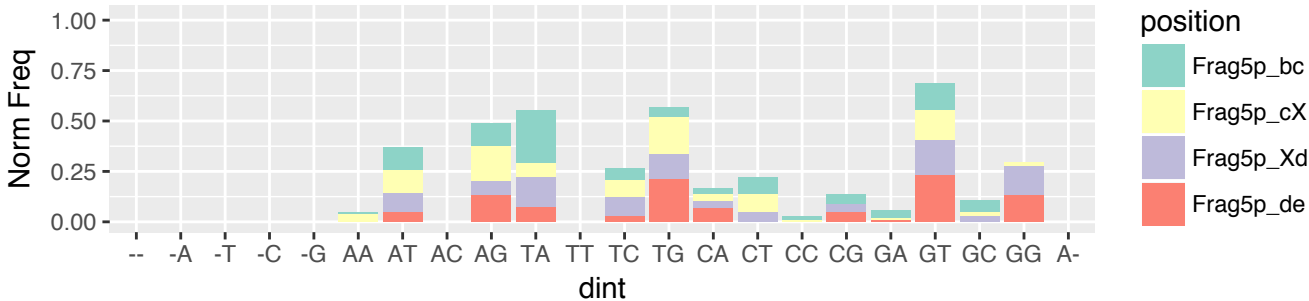

READ (n=1281)  
i-tRF & exclusive (n=272)  
5' terminus relative to 5' stem of D-loop (n=98)

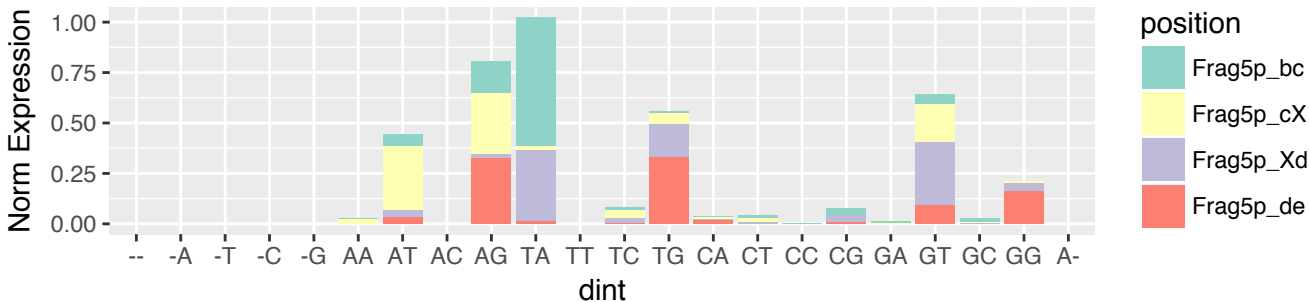

READ (n=1281)  
i-tRF & exclusive (n=272)  
5' terminus relative to 3' stem of D-loop (n=7)

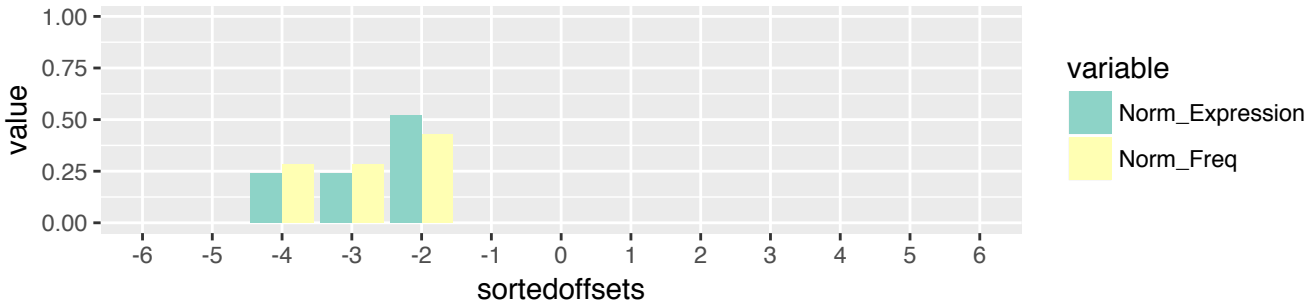

READ (n=1281)  
i-tRF & exclusive (n=272)  
5' terminus relative to 3' stem of D-loop (n=7)

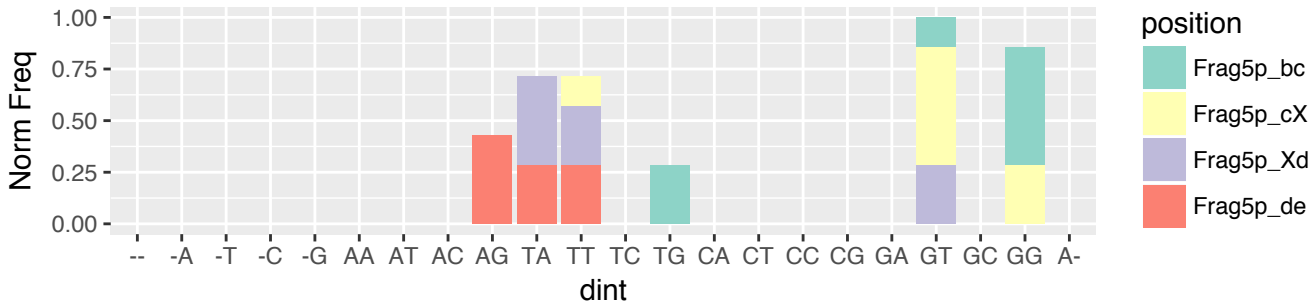

READ (n=1281)  
i-tRF & exclusive (n=272)  
5' terminus relative to 3' stem of D-loop (n=7)

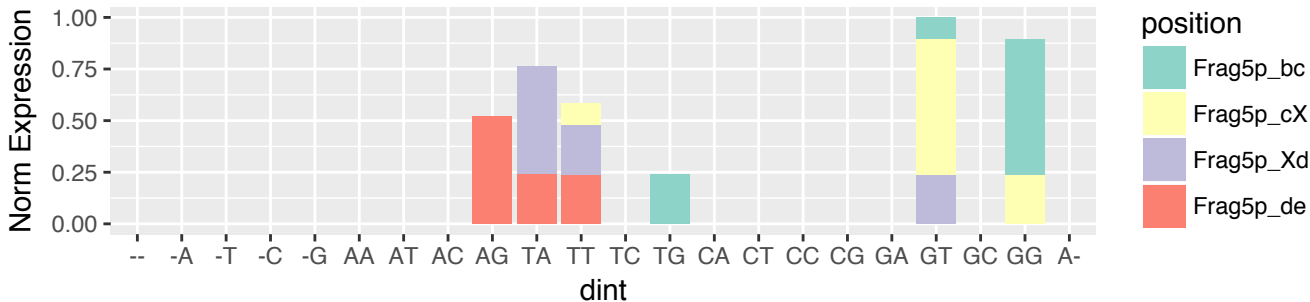

READ (n=1281)  
 i-tRF & exclusive (n=272)  
 5' terminus relative to 5' stem of A-loop (n=54)

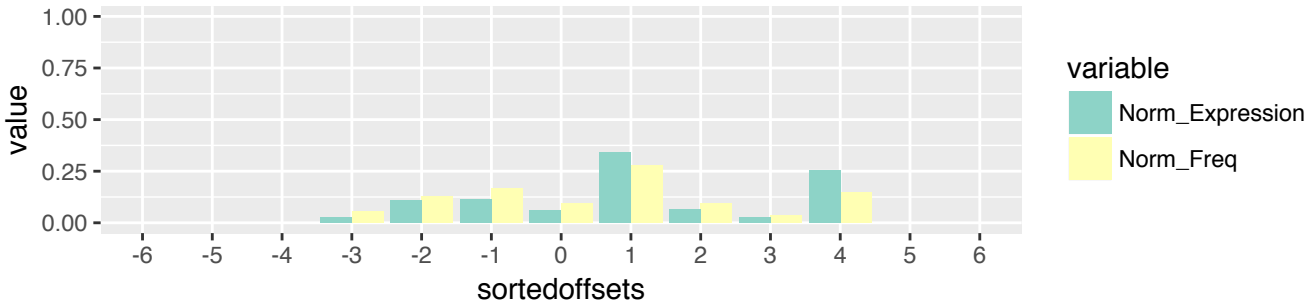

READ (n=1281)  
 i-tRF & exclusive (n=272)  
 5' terminus relative to 5' stem of A-loop (n=54)

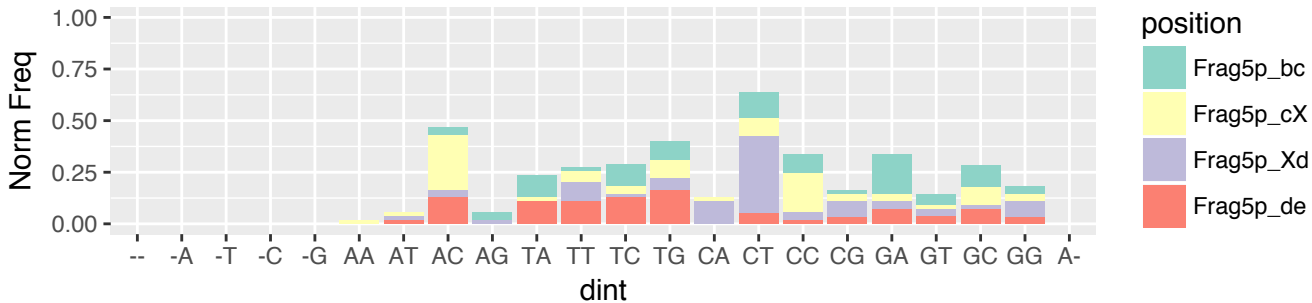

READ (n=1281)  
 i-tRF & exclusive (n=272)  
 5' terminus relative to 5' stem of A-loop (n=54)

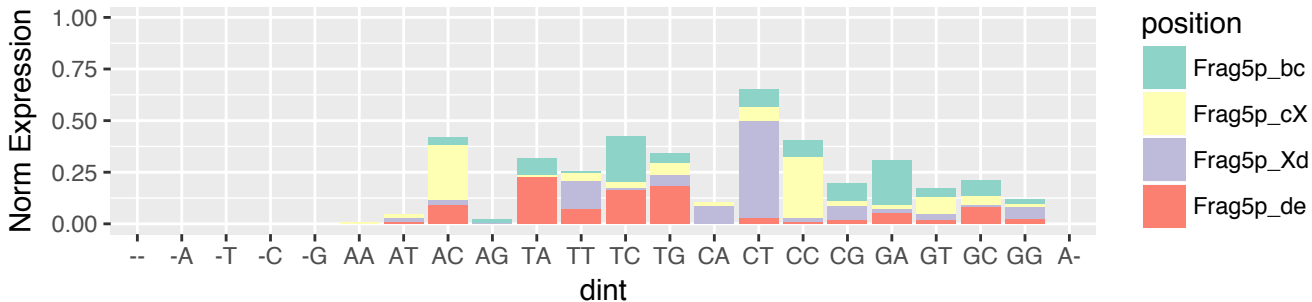

READ (n=1281)  
 i-tRF & exclusive (n=272)  
 5' terminus relative to 3' stem of A-loop (n=72)

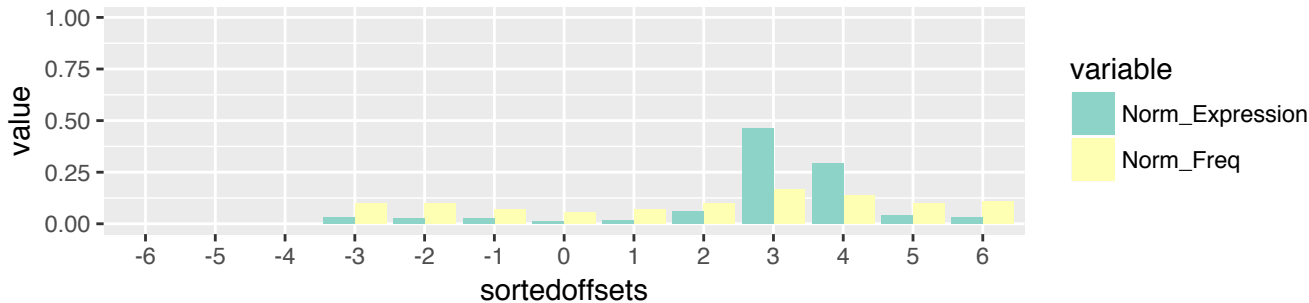

READ (n=1281)  
 i-tRF & exclusive (n=272)  
 5' terminus relative to 3' stem of A-loop (n=72)

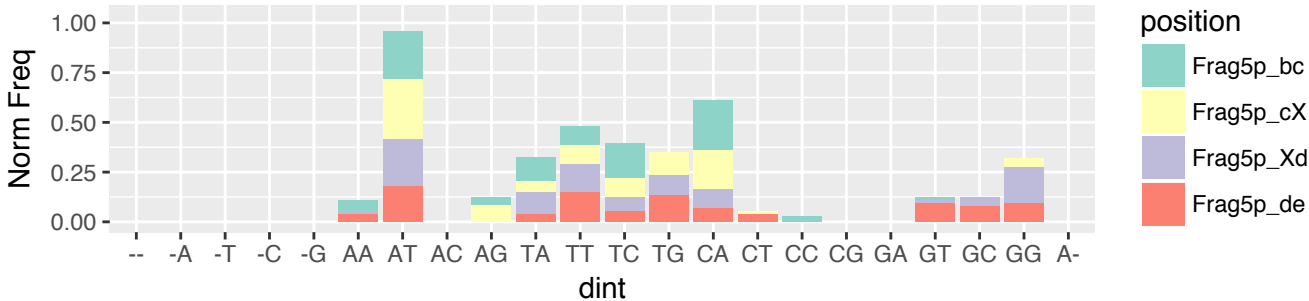

READ (n=1281)  
 i-tRF & exclusive (n=272)  
 5' terminus relative to 3' stem of A-loop (n=72)

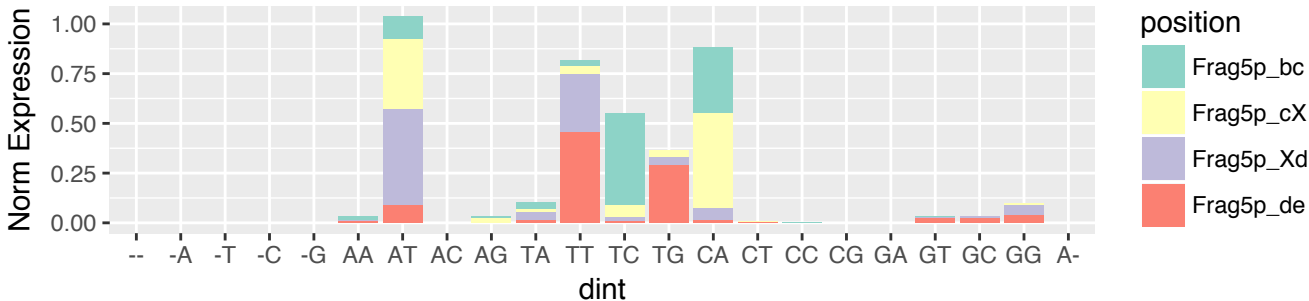

READ (n=1281)  
 i-tRF & exclusive (n=272)  
 5' terminus relative to 5' stem of T-loop (n=34)

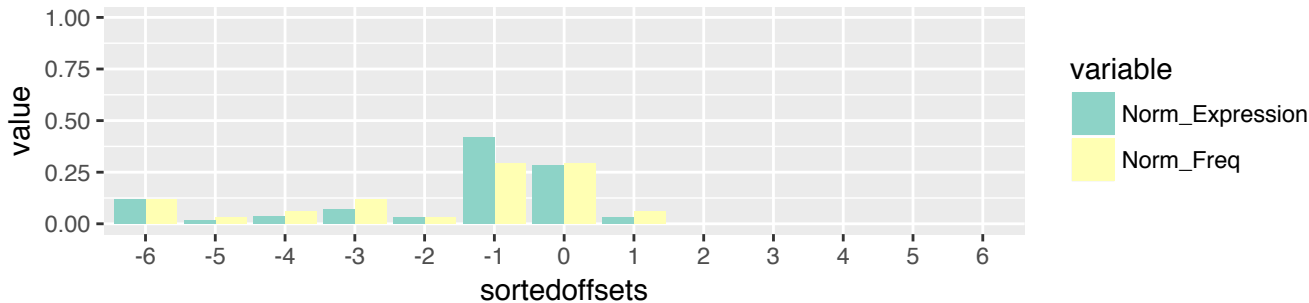

READ (n=1281)  
 i-tRF & exclusive (n=272)  
 5' terminus relative to 5' stem of T-loop (n=34)

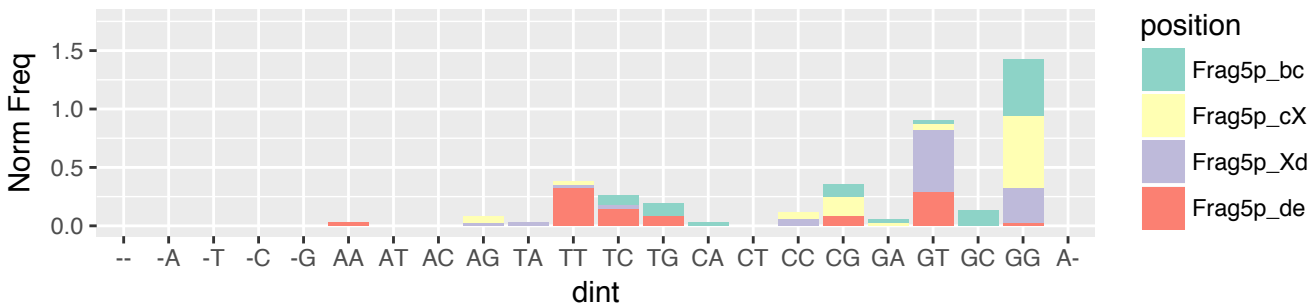

READ (n=1281)  
 i-tRF & exclusive (n=272)  
 5' terminus relative to 5' stem of T-loop (n=34)

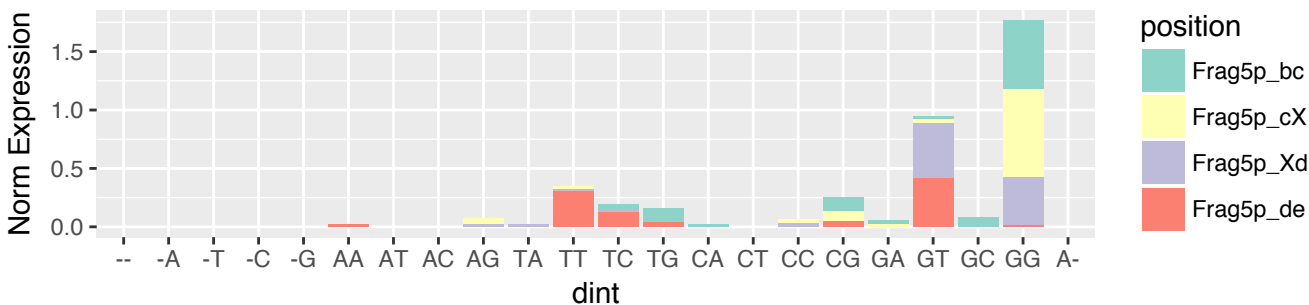

READ (n=1281)  
 i-tRF & exclusive (n=272)  
 3' terminus relative to 3' stem of D-loop (n=3)

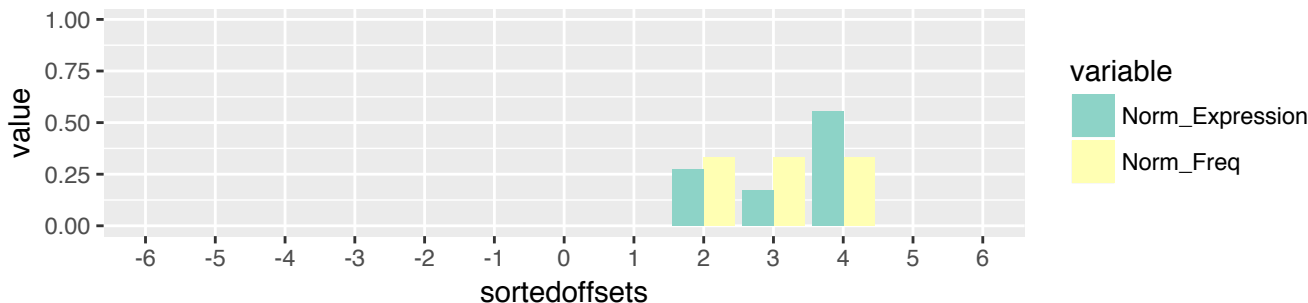

READ (n=1281)  
 i-tRF & exclusive (n=272)  
 3' terminus relative to 3' stem of D-loop (n=3)

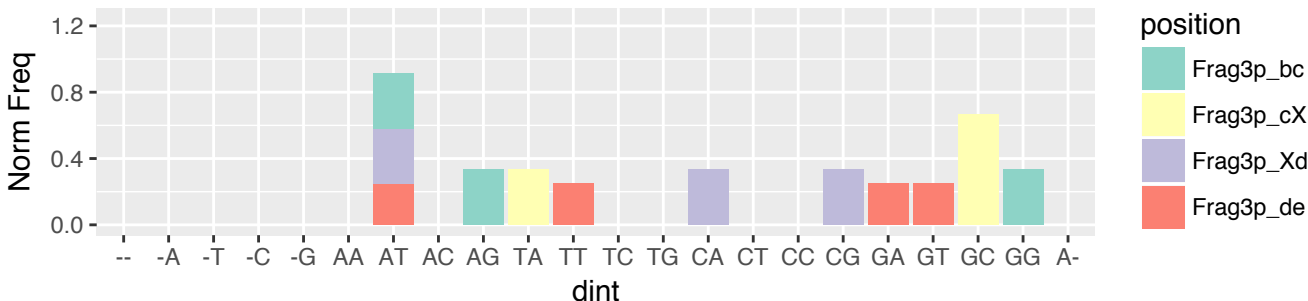

READ (n=1281)  
 i-tRF & exclusive (n=272)  
 3' terminus relative to 3' stem of D-loop (n=3)

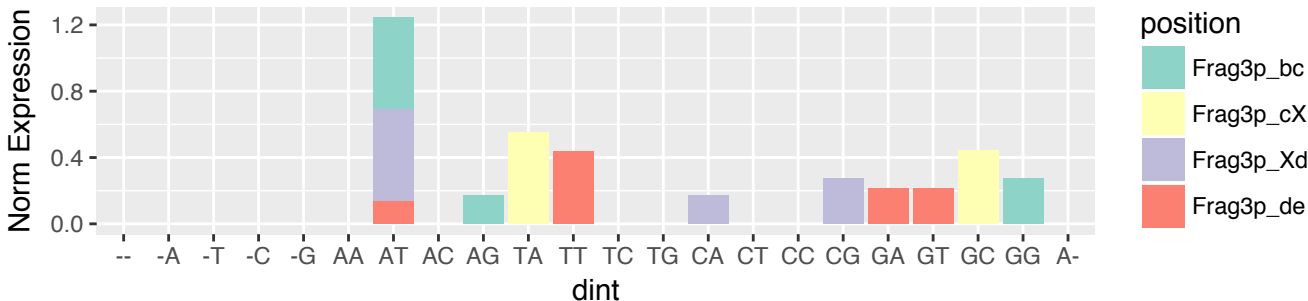

READ (n=1281)  
 i-tRF & exclusive (n=272)  
 3' terminus relative to 5' stem of A-loop (n=81)

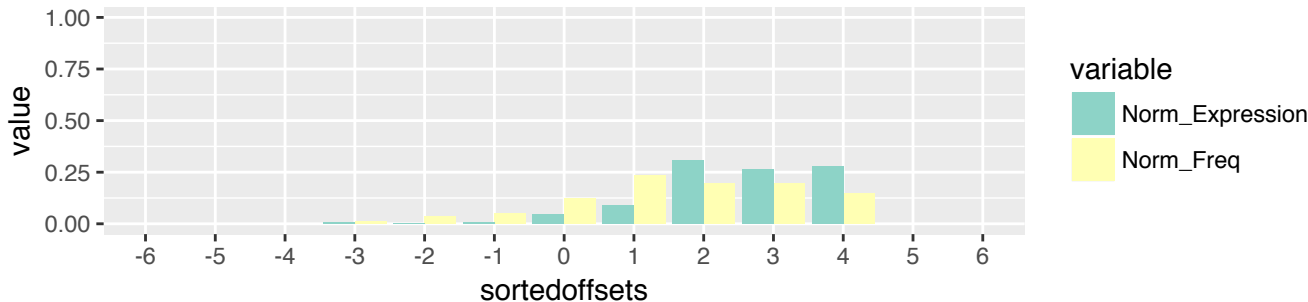

READ (n=1281)  
 i-tRF & exclusive (n=272)  
 3' terminus relative to 5' stem of A-loop (n=81)

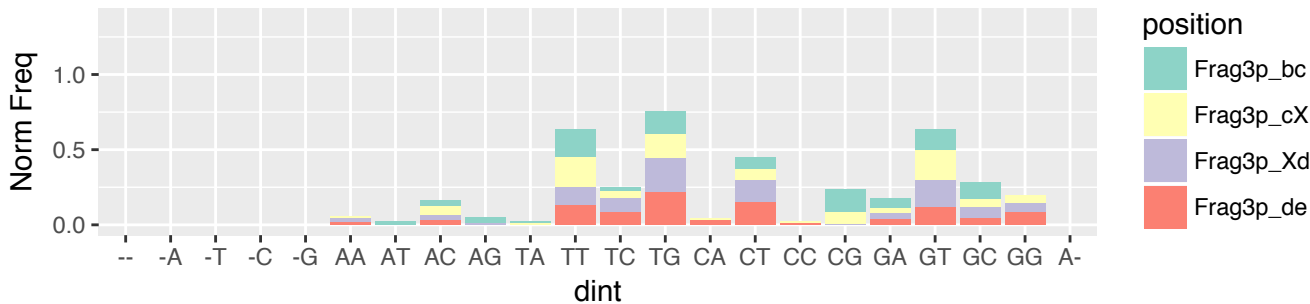

READ (n=1281)  
 i-tRF & exclusive (n=272)  
 3' terminus relative to 5' stem of A-loop (n=81)

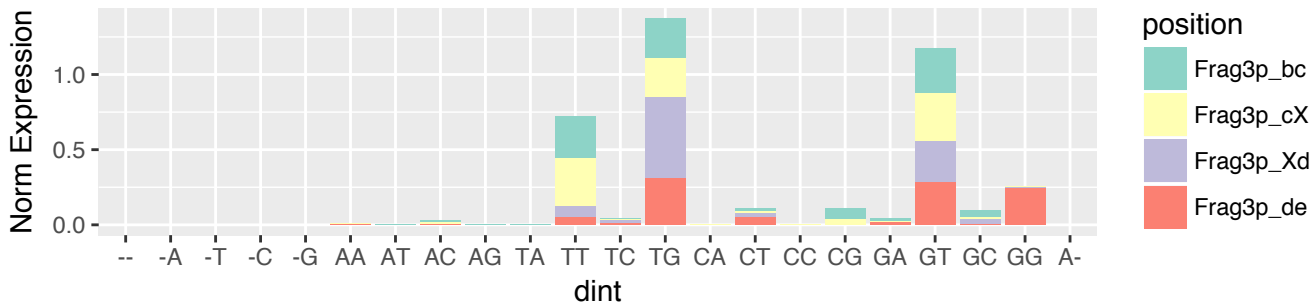



READ (n=1281)  
 i-tRF & exclusive (n=272)  
 3' terminus relative to 3' stem of A-loop (n=39)

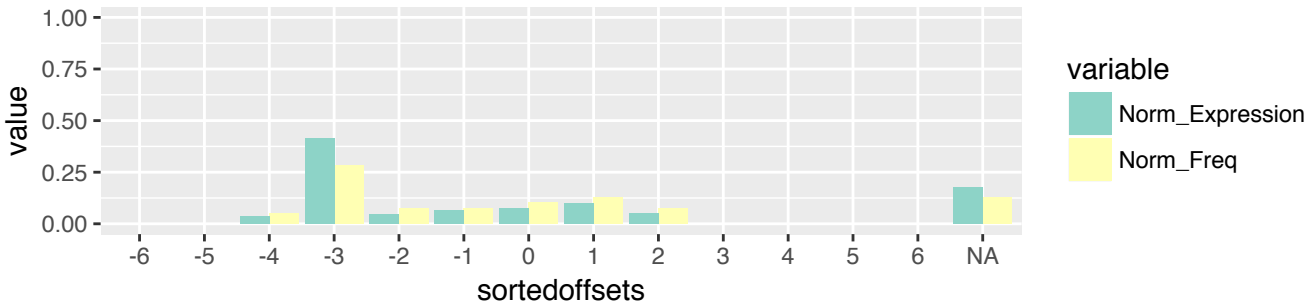

READ (n=1281)  
 i-tRF & exclusive (n=272)  
 3' terminus relative to 3' stem of A-loop (n=39)

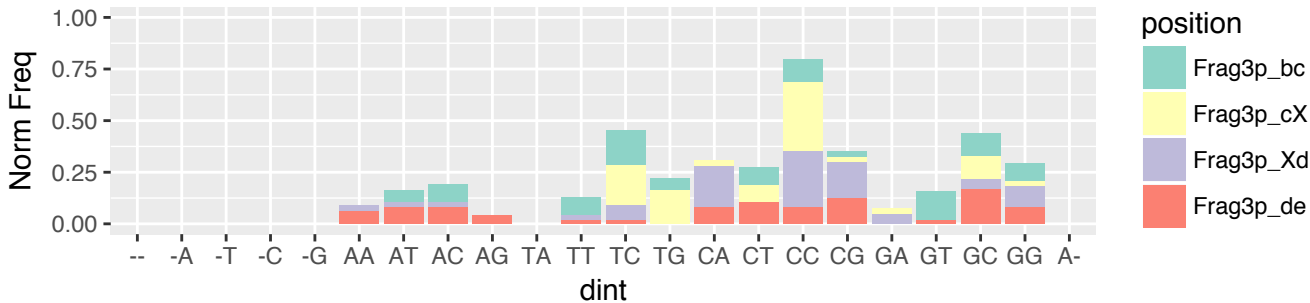

READ (n=1281)  
 i-tRF & exclusive (n=272)  
 3' terminus relative to 3' stem of A-loop (n=39)

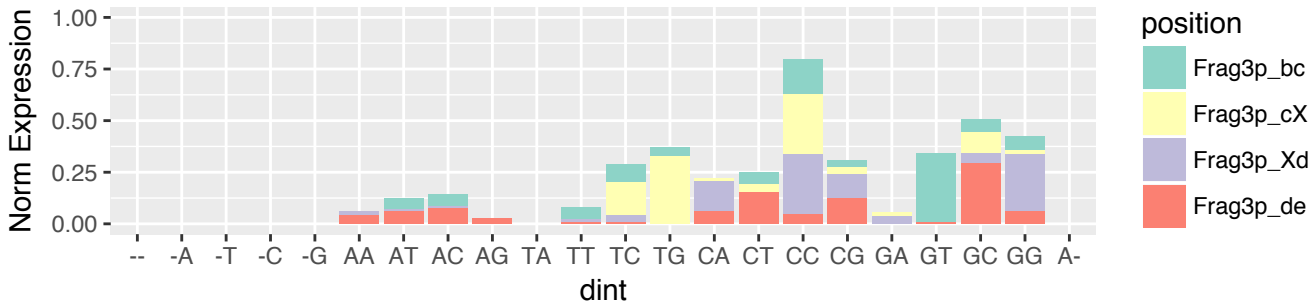

READ (n=1281)  
 i-tRF & exclusive (n=272)  
 3' terminus relative to 5' stem of T-loop (n=55)

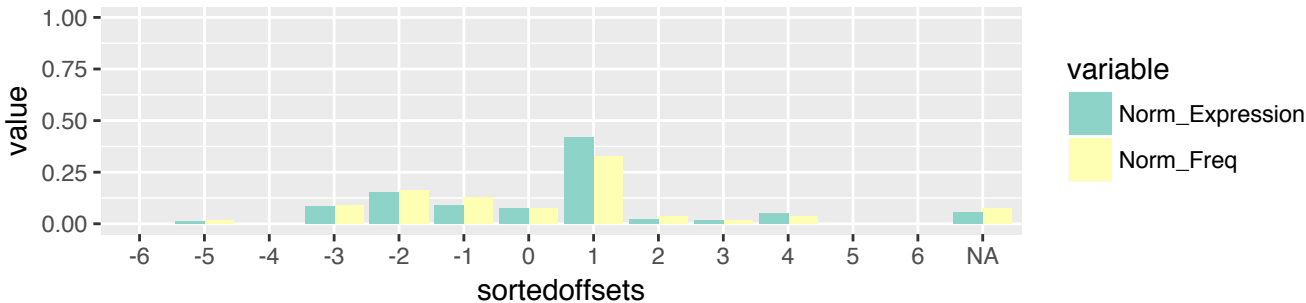

READ (n=1281)  
 i-tRF & exclusive (n=272)  
 3' terminus relative to 5' stem of T-loop (n=55)

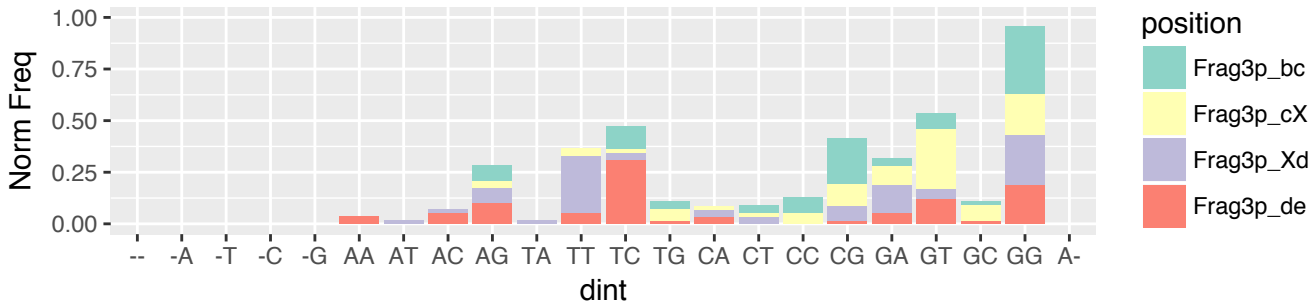

READ (n=1281)  
 i-tRF & exclusive (n=272)  
 3' terminus relative to 5' stem of T-loop (n=55)

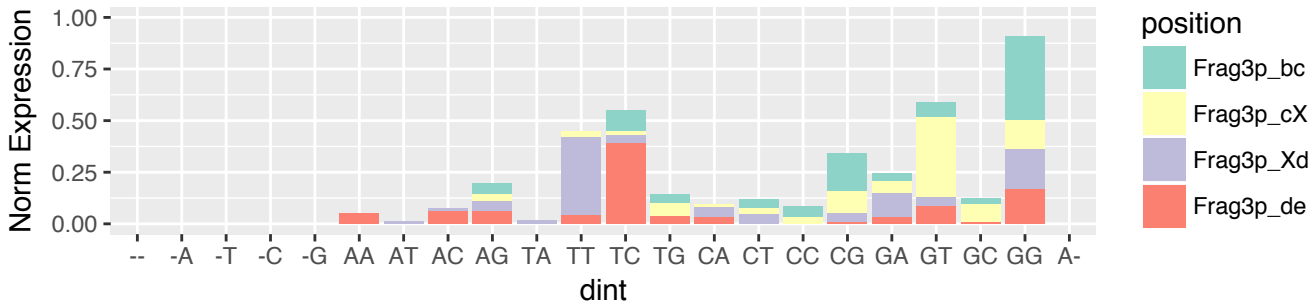

READ (n=1281)  
i-tRF & exclusive (n=272)  
3' terminus relative to 3' stem of T-loop (n=56)

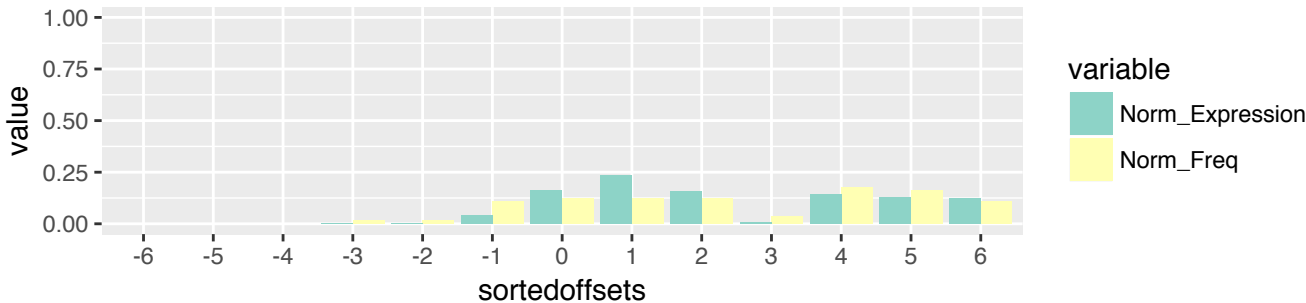

READ (n=1281)  
i-tRF & exclusive (n=272)  
3' terminus relative to 3' stem of T-loop (n=56)

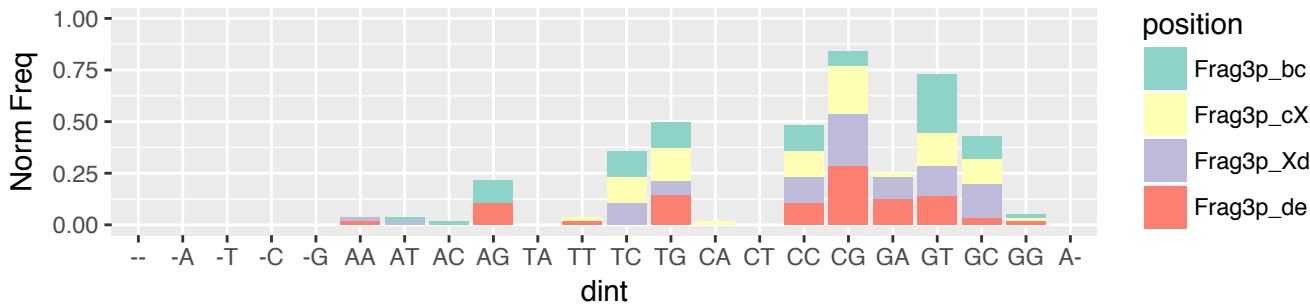

READ (n=1281)  
i-tRF & exclusive (n=272)  
3' terminus relative to 3' stem of T-loop (n=56)

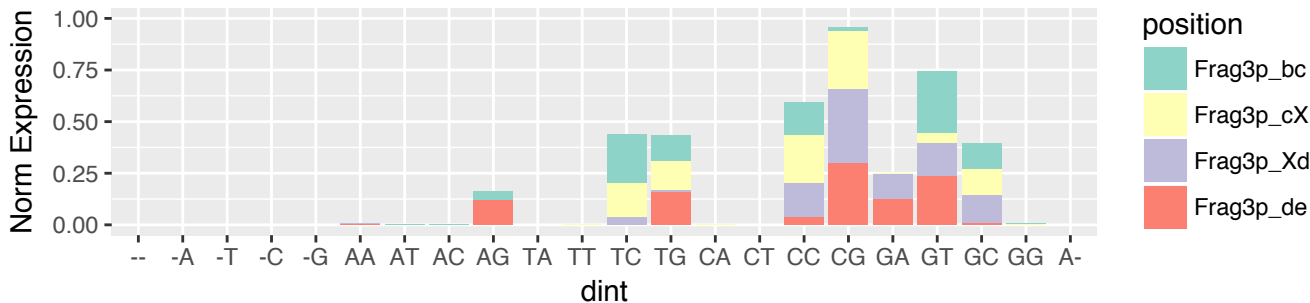

READ (n=1281)  
 i-tRF & exclusive (n=272)  
 3' terminus relative to 3' end of the tRNA (n=41)

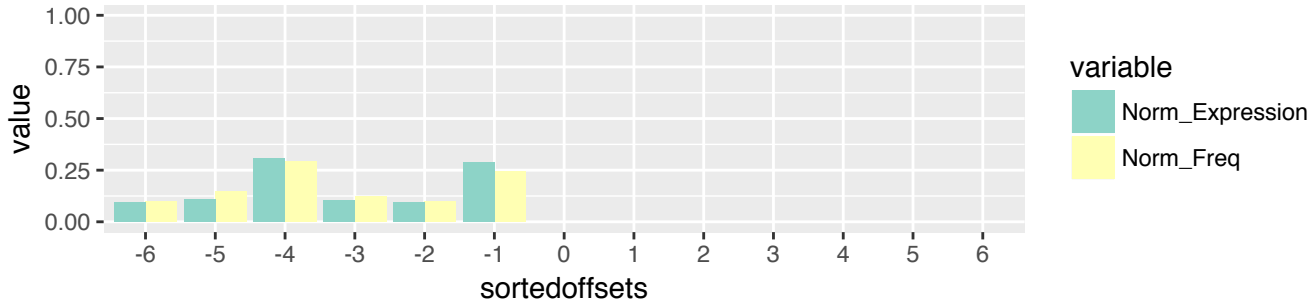

READ (n=1281)  
 i-tRF & exclusive (n=272)  
 3' terminus relative to 3' end of the tRNA (n=41)

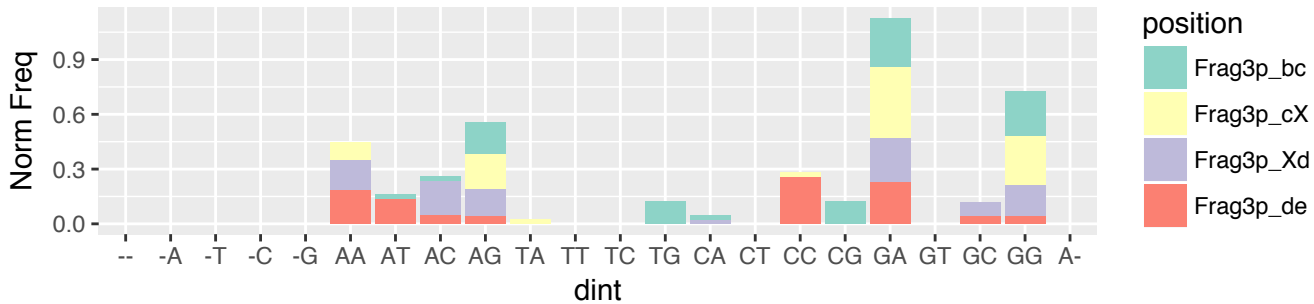

READ (n=1281)  
 i-tRF & exclusive (n=272)  
 3' terminus relative to 3' end of the tRNA (n=41)

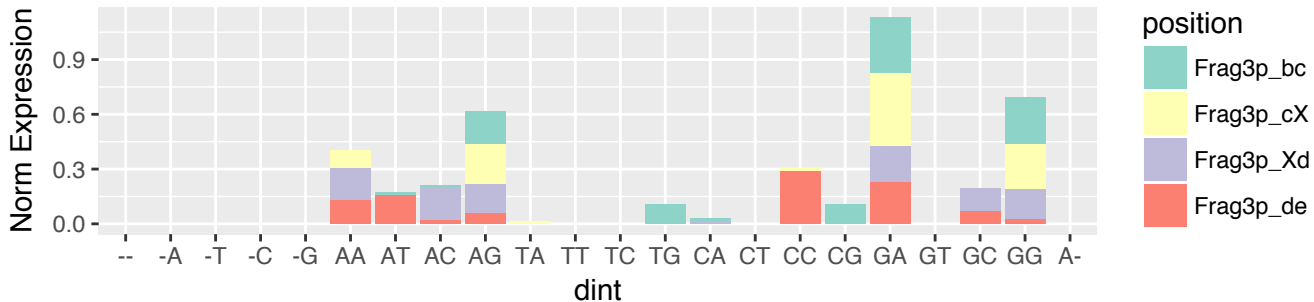

READ (n=1281)  
3'-tRF & exclusive (n=218)  
5' terminus relative to 5' stem of T-loop (n=145)

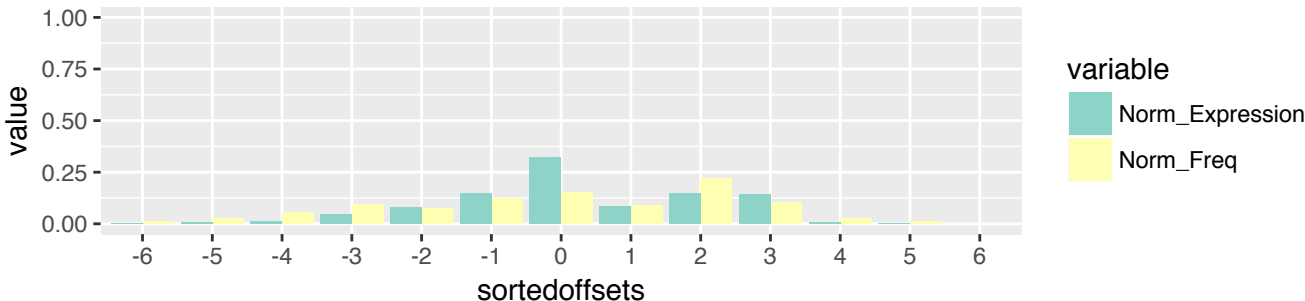

READ (n=1281)  
3'-tRF & exclusive (n=218)  
5' terminus relative to 5' stem of T-loop (n=145)

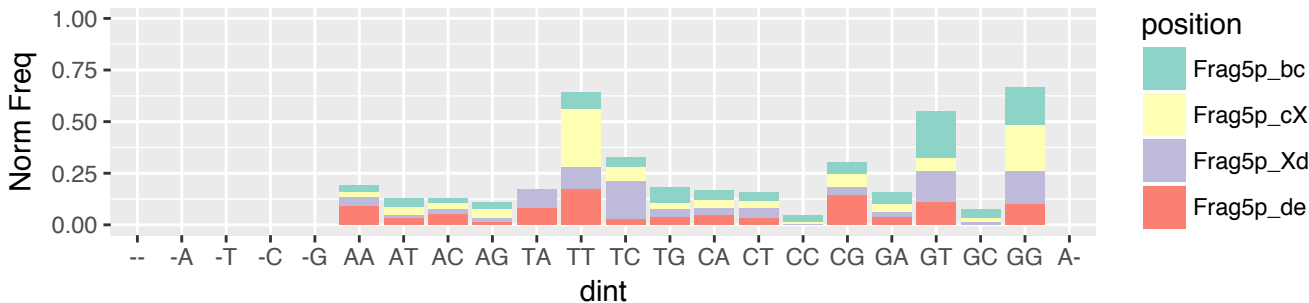

READ (n=1281)  
3'-tRF & exclusive (n=218)  
5' terminus relative to 5' stem of T-loop (n=145)

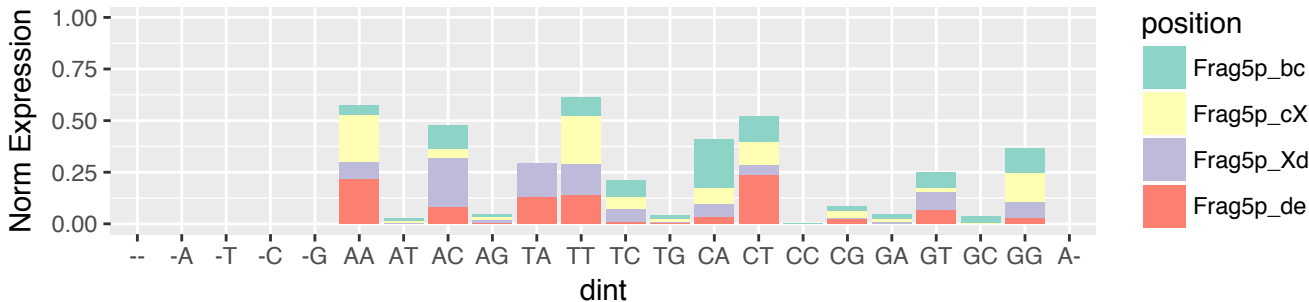

READ (n=1281)  
 3'-tRF & exclusive (n=218)  
 5' terminus relative to 3' stem of T-loop (n=73)

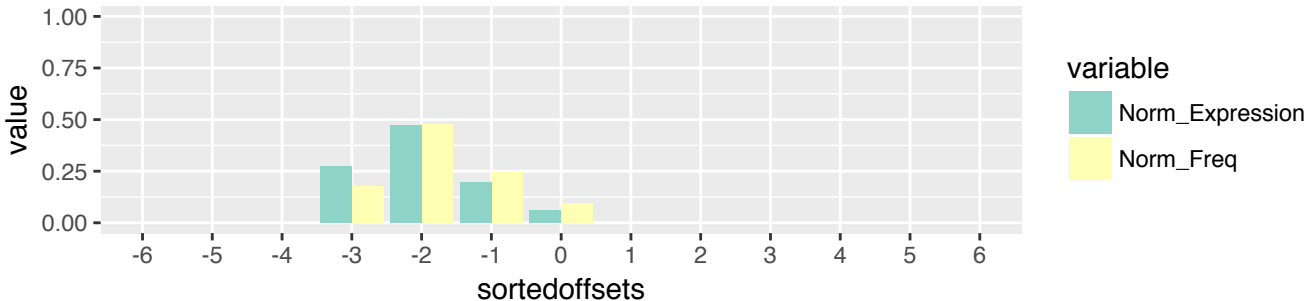

READ (n=1281)  
 3'-tRF & exclusive (n=218)  
 5' terminus relative to 3' stem of T-loop (n=73)

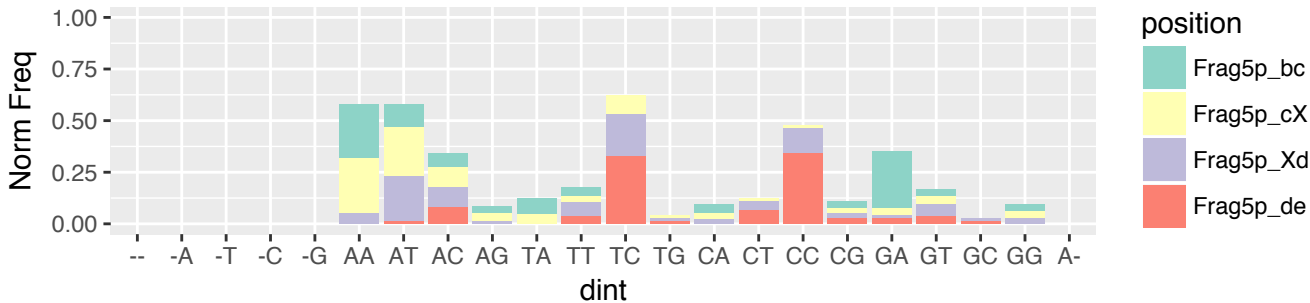

READ (n=1281)  
 3'-tRF & exclusive (n=218)  
 5' terminus relative to 3' stem of T-loop (n=73)

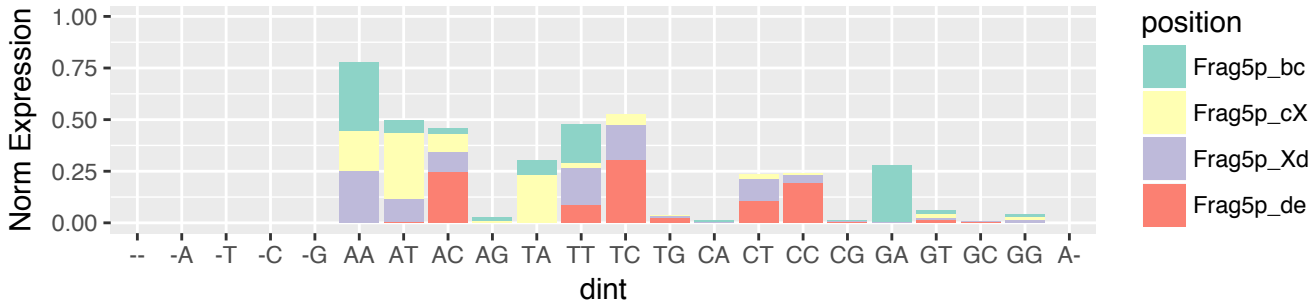

READ (n=1281)  
 3'-tRF & exclusive (n=218)  
 3' terminus relative to 3' end of the tRNA (n=218)

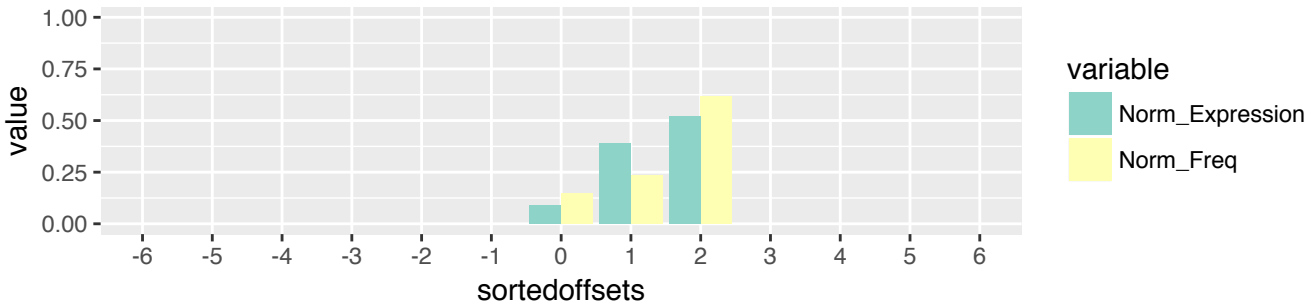

READ (n=1281)  
 3'-tRF & exclusive (n=218)  
 3' terminus relative to 3' end of the tRNA (n=218)

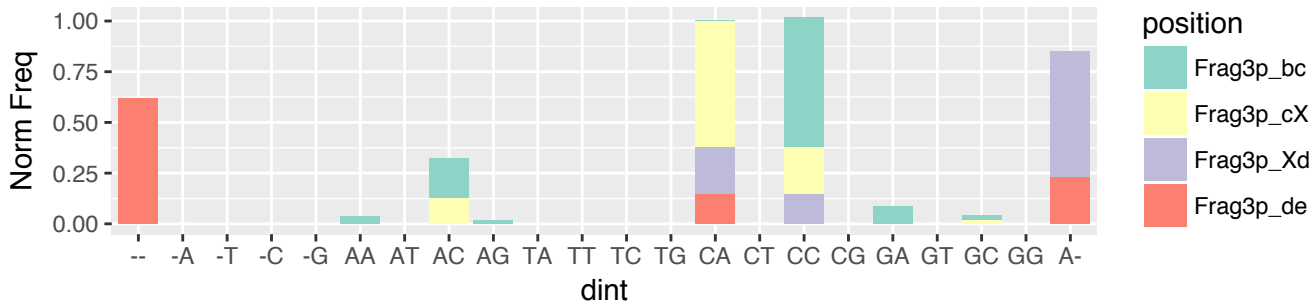

READ (n=1281)  
 3'-tRF & exclusive (n=218)  
 3' terminus relative to 3' end of the tRNA (n=218)

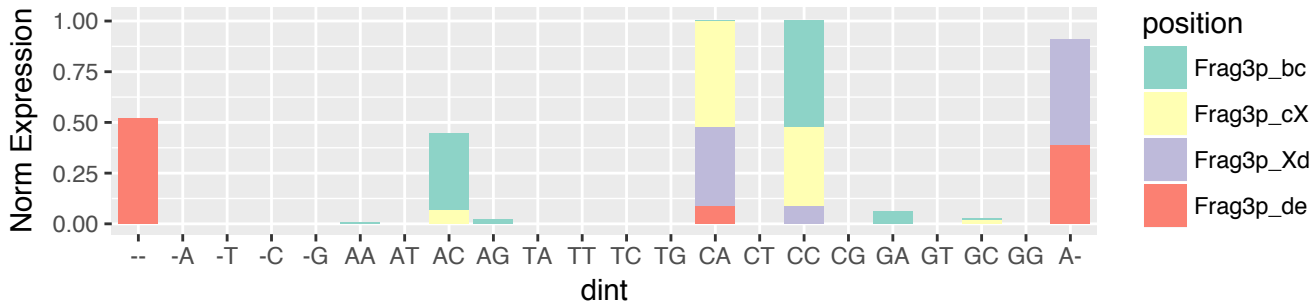

SARC (n=490)  
5'-half & exclusive (n=1)  
5' terminus relative to 5' end of the tRNA (n=1)

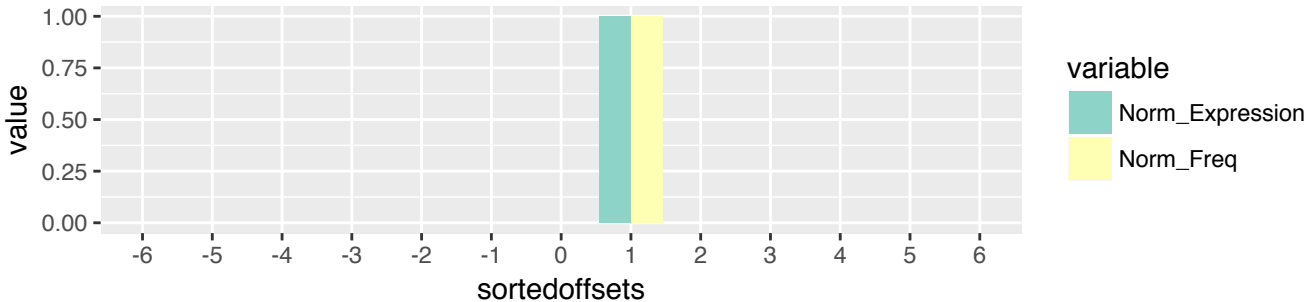

SARC (n=490)  
5'-half & exclusive (n=1)  
5' terminus relative to 5' end of the tRNA (n=1)

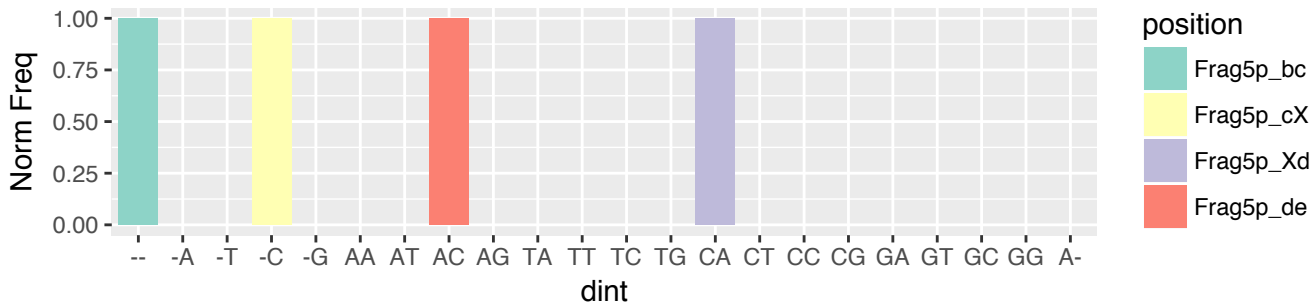

SARC (n=490)  
5'-half & exclusive (n=1)  
5' terminus relative to 5' end of the tRNA (n=1)

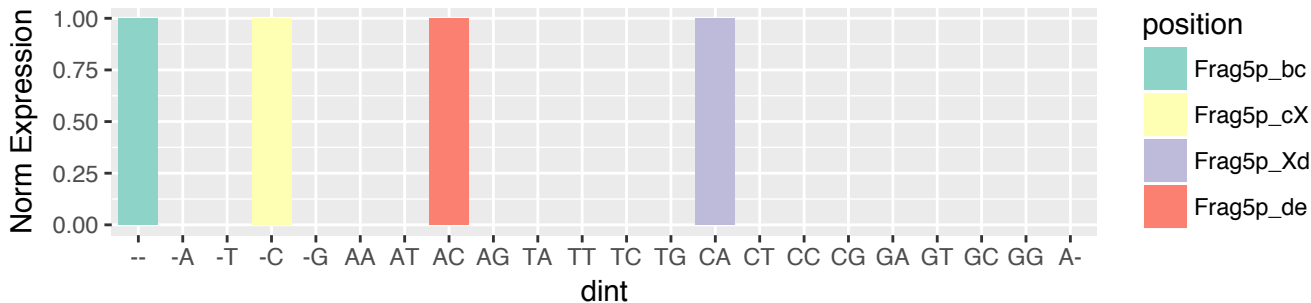



SARC (n=490)  
5'-half & exclusive (n=1)  
3' terminus relative to 5' stem of A-loop (n=1)

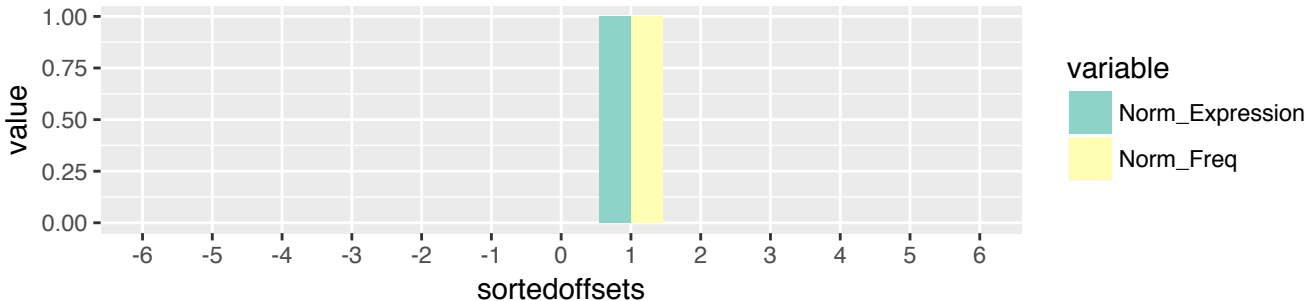

SARC (n=490)  
5'-half & exclusive (n=1)  
3' terminus relative to 5' stem of A-loop (n=1)

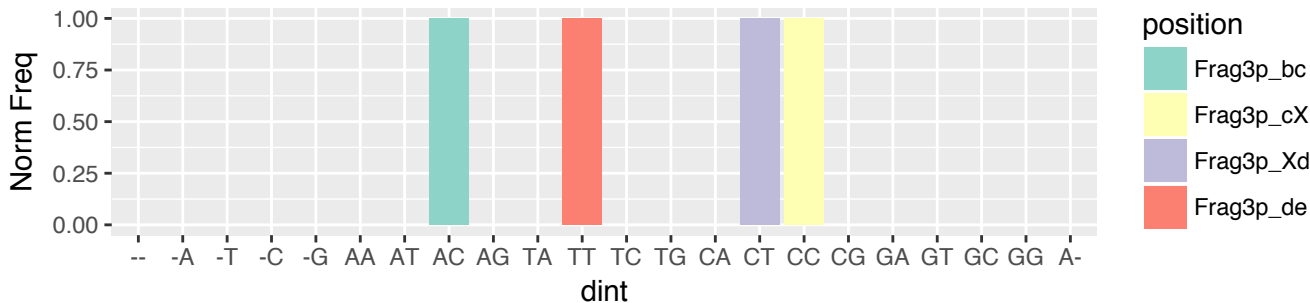

SARC (n=490)  
5'-half & exclusive (n=1)  
3' terminus relative to 5' stem of A-loop (n=1)

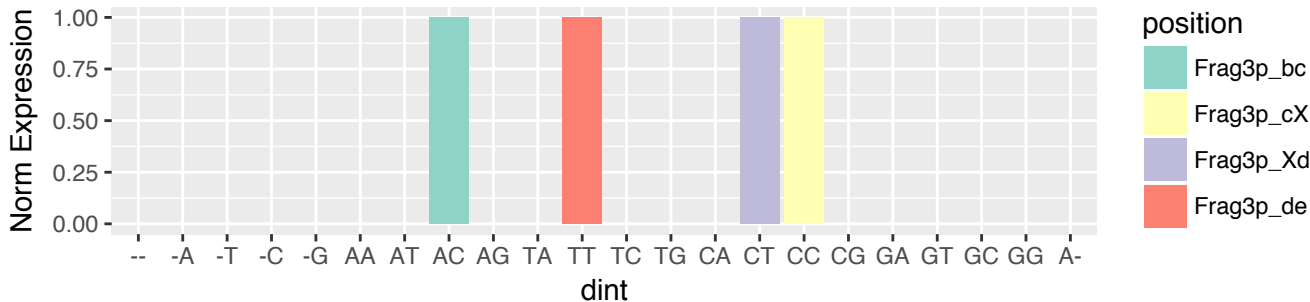

SARC (n=490)  
 5'-tRF & exclusive (n=86)  
 5' terminus relative to 5' end of the tRNA (n=86)

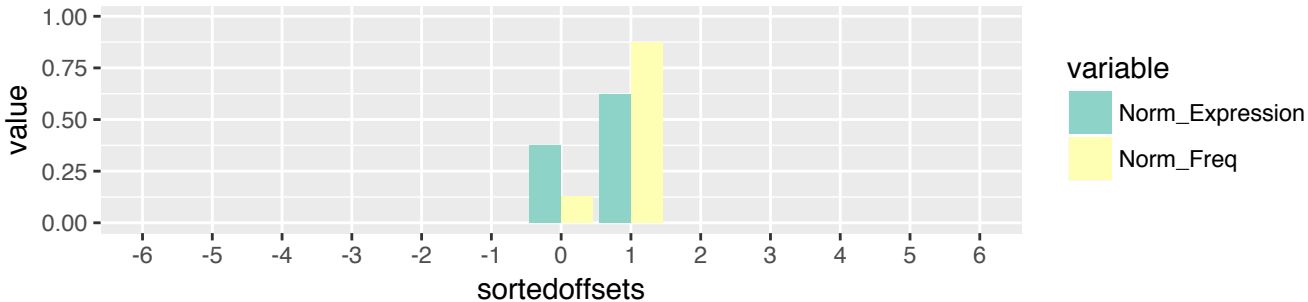

SARC (n=490)  
 5'-tRF & exclusive (n=86)  
 5' terminus relative to 5' end of the tRNA (n=86)

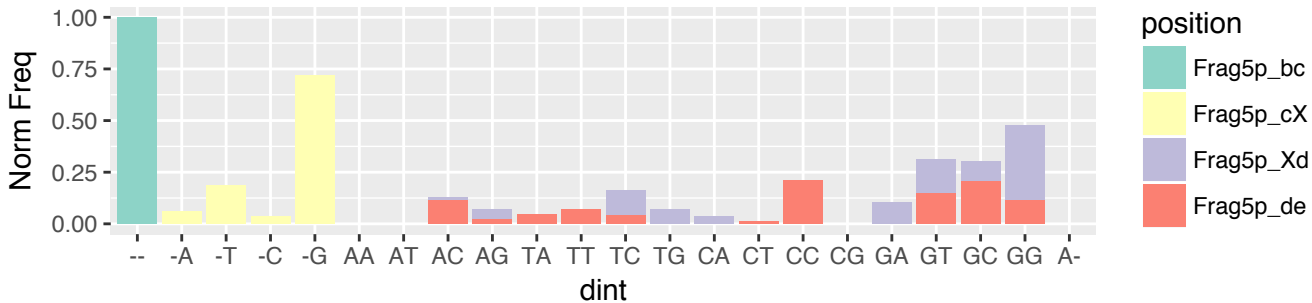

SARC (n=490)  
 5'-tRF & exclusive (n=86)  
 5' terminus relative to 5' end of the tRNA (n=86)

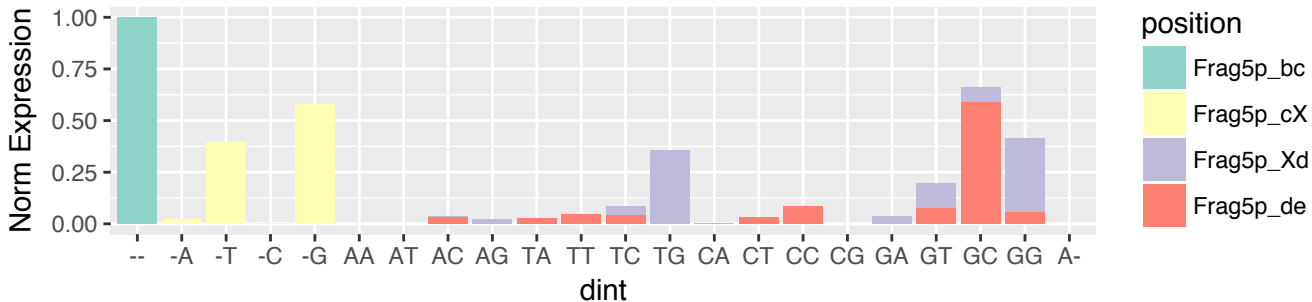

SARC (n=490)  
 5'-tRF & exclusive (n=86)  
 3' terminus relative to 5' stem of D-loop (n=2)

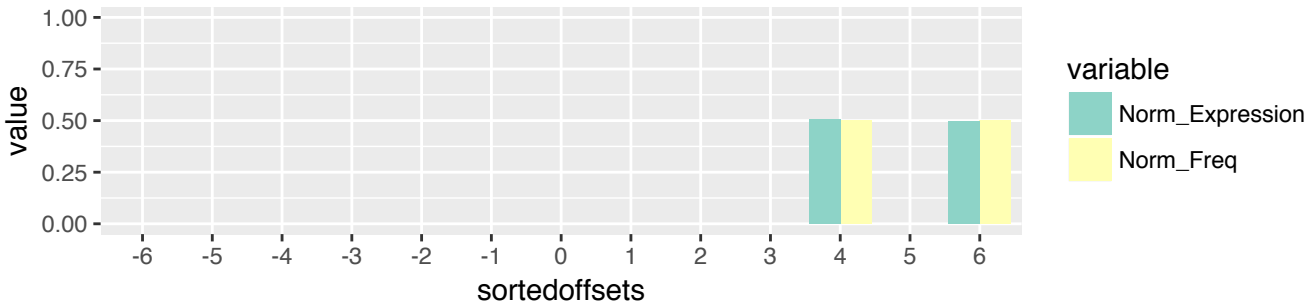

SARC (n=490)  
 5'-tRF & exclusive (n=86)  
 3' terminus relative to 5' stem of D-loop (n=2)



SARC (n=490)  
 5'-tRF & exclusive (n=86)  
 3' terminus relative to 5' stem of D-loop (n=2)

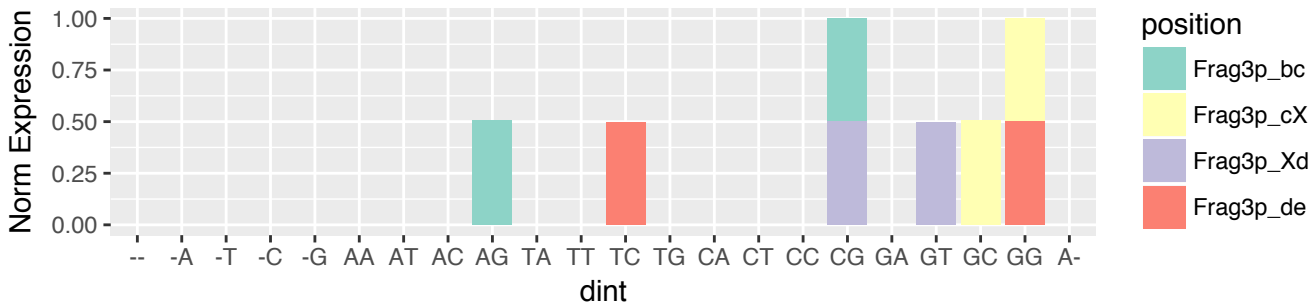

SARC (n=490)  
 5'-tRF & exclusive (n=86)  
 3' terminus relative to 3' stem of D-loop (n=80)

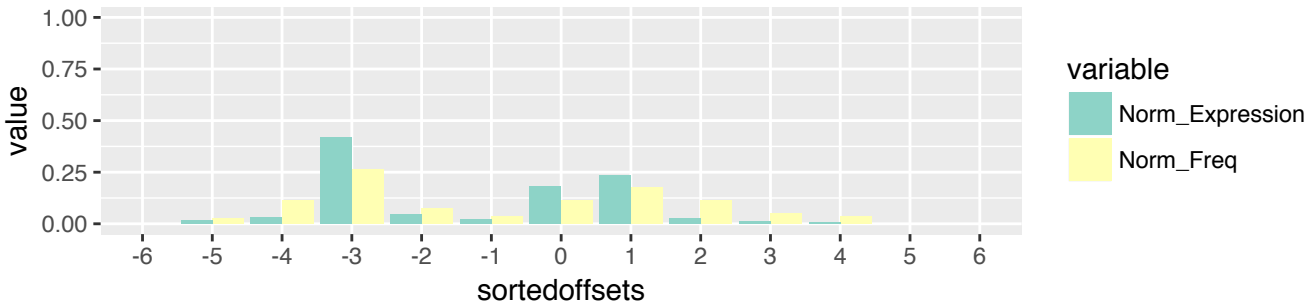

SARC (n=490)  
 5'-tRF & exclusive (n=86)  
 3' terminus relative to 3' stem of D-loop (n=80)

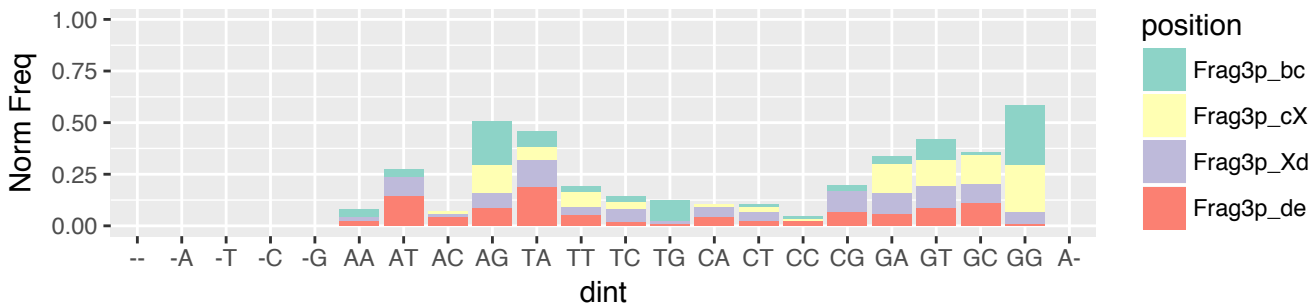

SARC (n=490)  
 5'-tRF & exclusive (n=86)  
 3' terminus relative to 3' stem of D-loop (n=80)

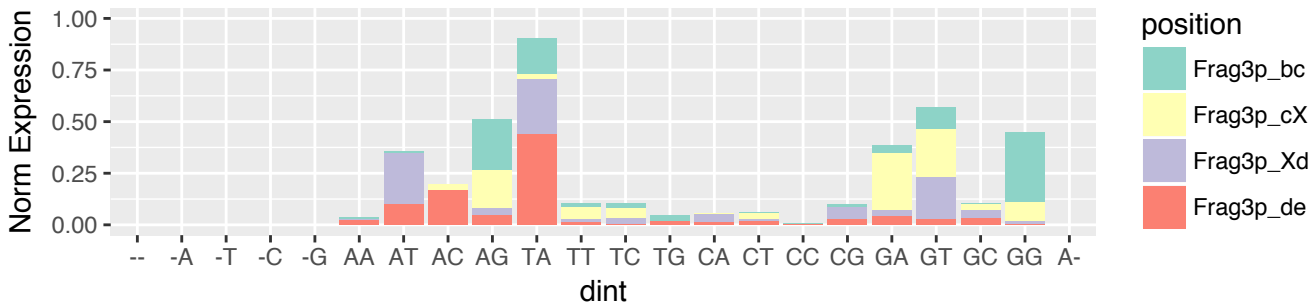

SARC (n=490)  
 5'-tRF & exclusive (n=86)  
 3' terminus relative to 5' stem of A-loop (n=2)

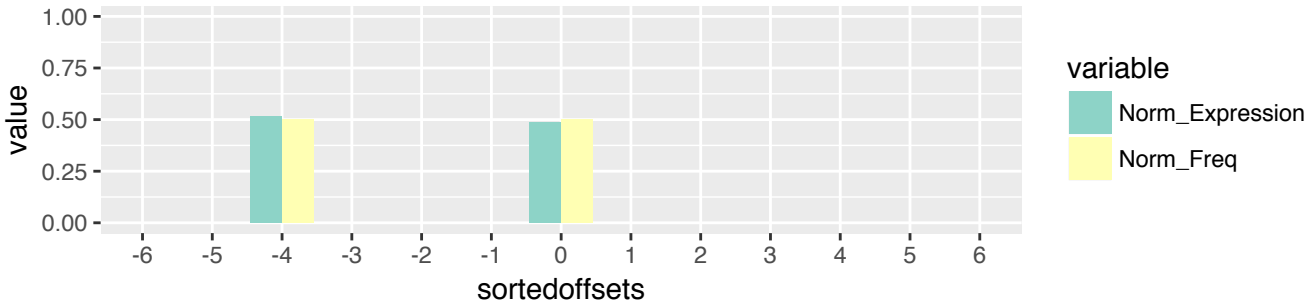

SARC (n=490)  
 5'-tRF & exclusive (n=86)  
 3' terminus relative to 5' stem of A-loop (n=2)

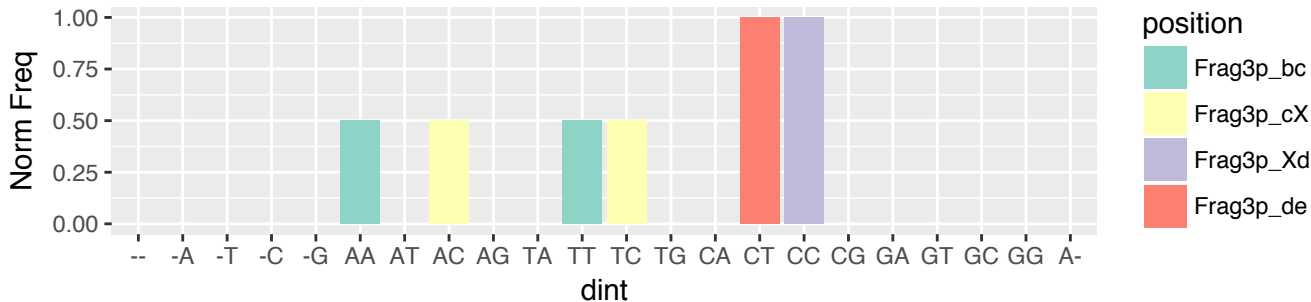

SARC (n=490)  
 5'-tRF & exclusive (n=86)  
 3' terminus relative to 5' stem of A-loop (n=2)

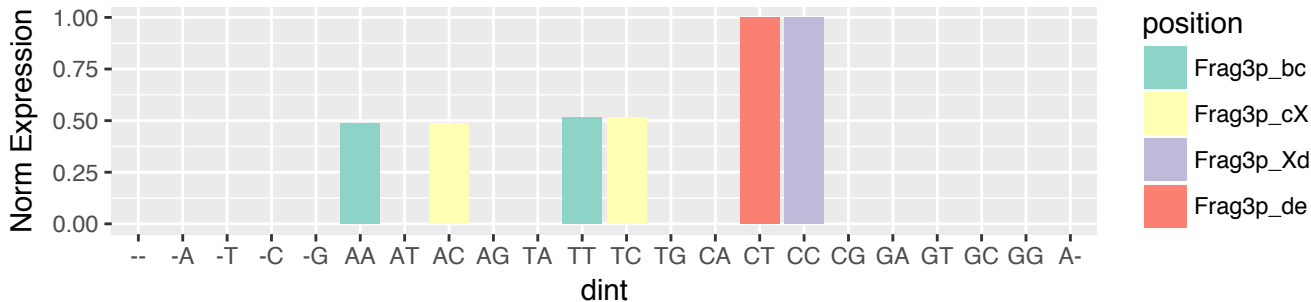

SARC (n=490)  
 5'-tRF & exclusive (n=86)  
 3' terminus relative to 3' stem of A-loop (n=2)

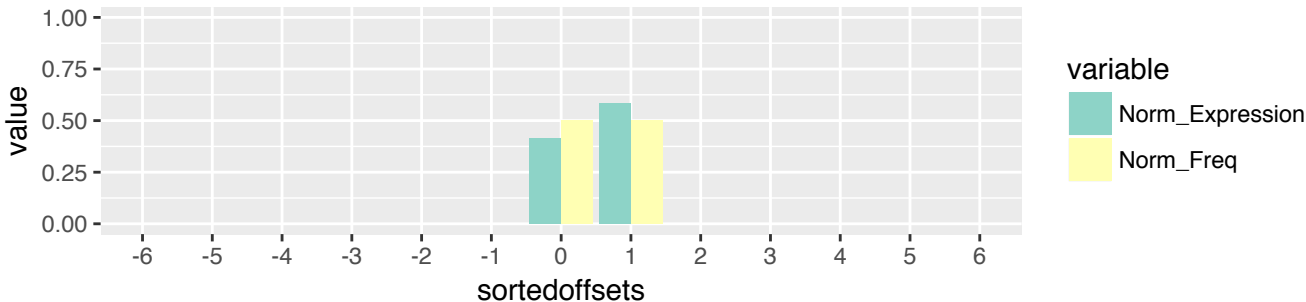

SARC (n=490)  
 5'-tRF & exclusive (n=86)  
 3' terminus relative to 3' stem of A-loop (n=2)

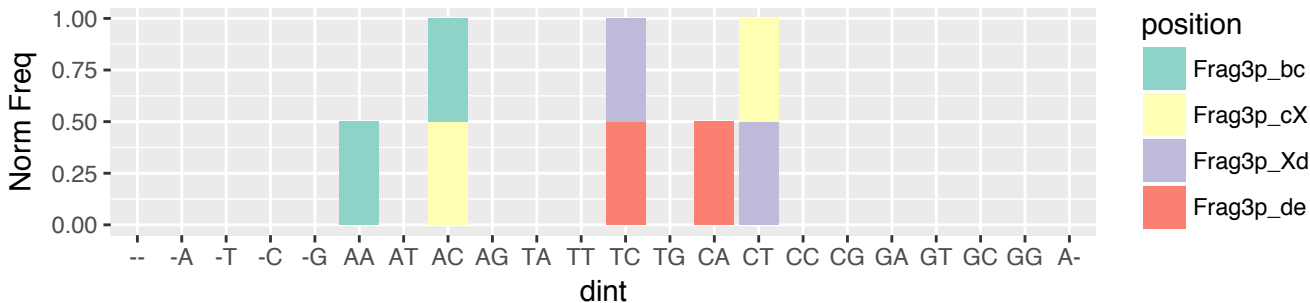

SARC (n=490)  
 5'-tRF & exclusive (n=86)  
 3' terminus relative to 3' stem of A-loop (n=2)

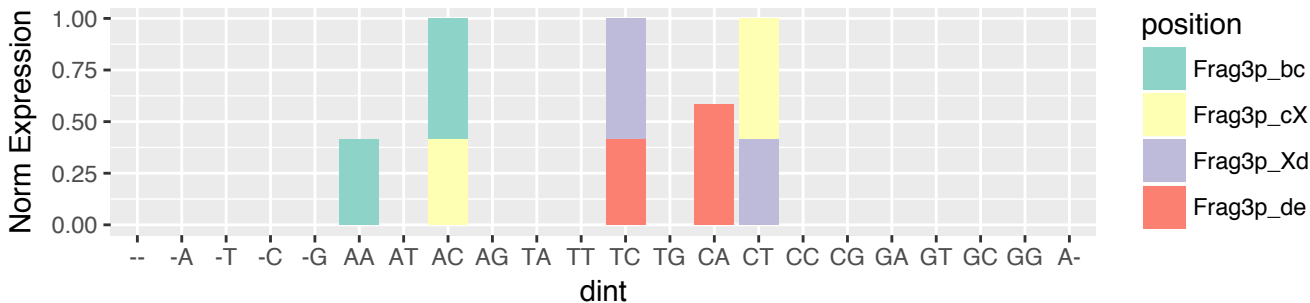

SARC (n=490)  
 i-tRF & exclusive (n=95)  
 5' terminus relative to 5' end of the tRNA (n=2)

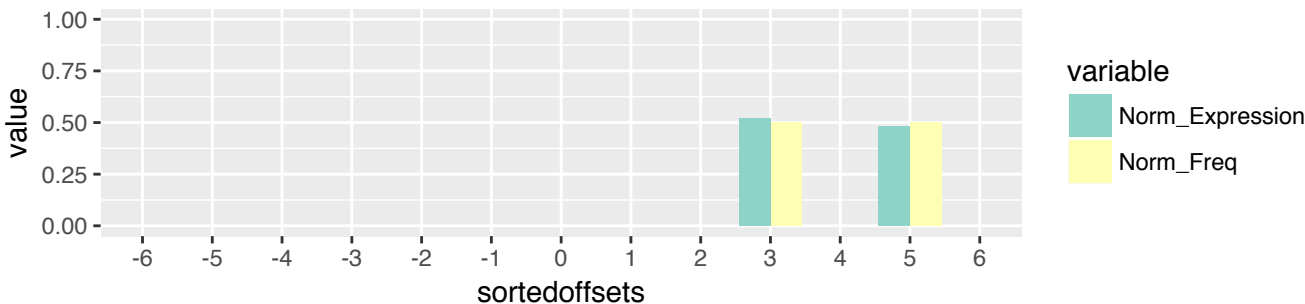

SARC (n=490)  
 i-tRF & exclusive (n=95)  
 5' terminus relative to 5' end of the tRNA (n=2)

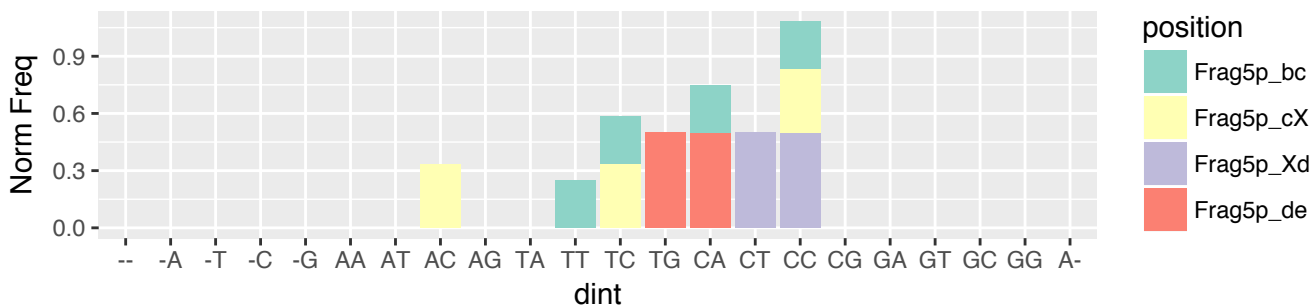

SARC (n=490)  
 i-tRF & exclusive (n=95)  
 5' terminus relative to 5' end of the tRNA (n=2)

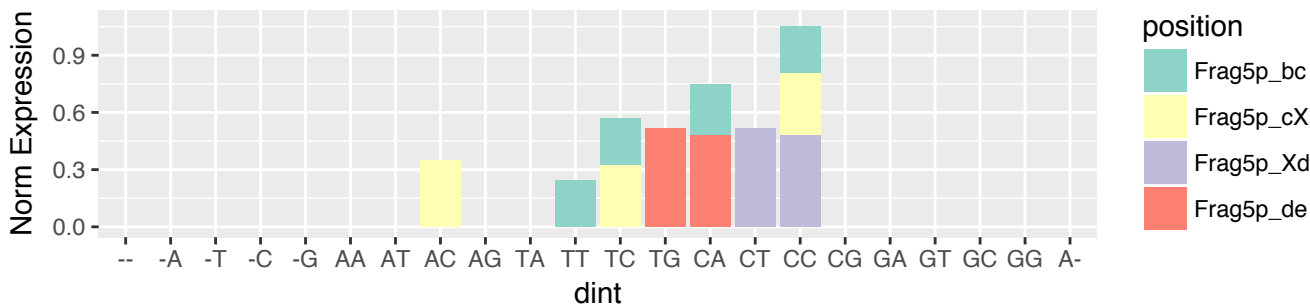

SARC (n=490)  
i-tRF & exclusive (n=95)  
5' terminus relative to 5' stem of D-loop (n=34)

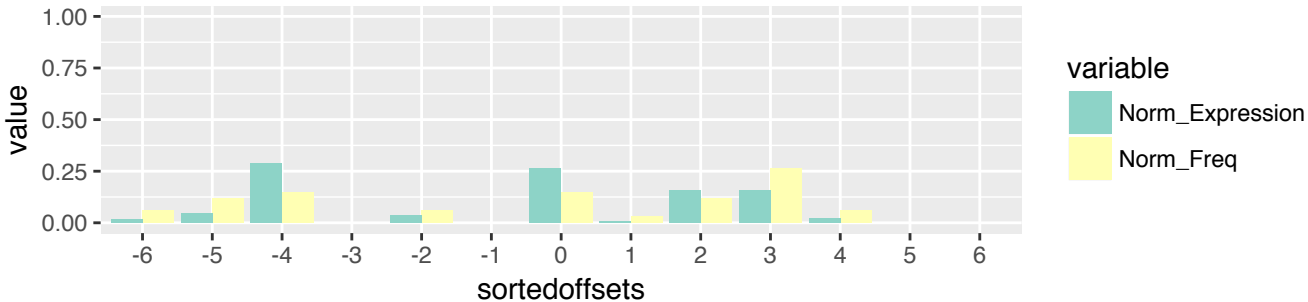

SARC (n=490)  
i-tRF & exclusive (n=95)  
5' terminus relative to 5' stem of D-loop (n=34)

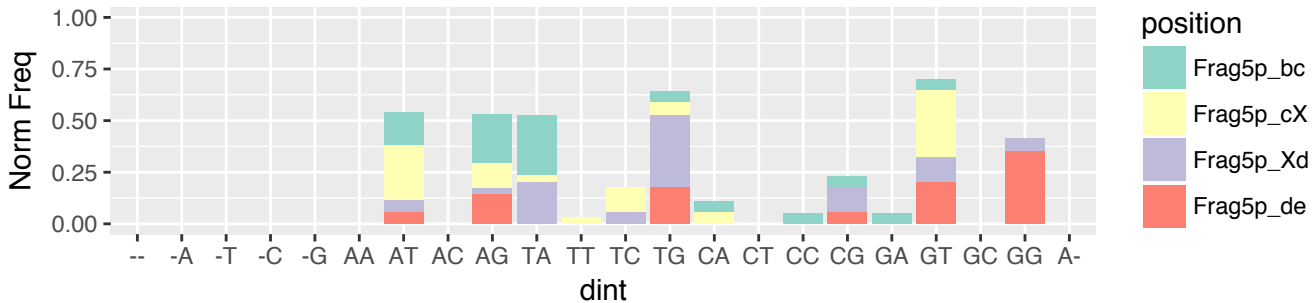

SARC (n=490)  
i-tRF & exclusive (n=95)  
5' terminus relative to 5' stem of D-loop (n=34)

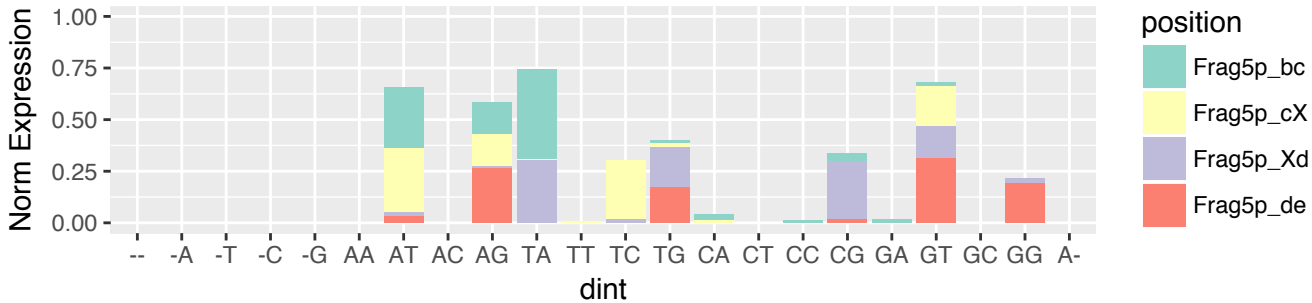



SARC (n=490)  
i-tRF & exclusive (n=95)  
5' terminus relative to 3' stem of D-loop (n=5)

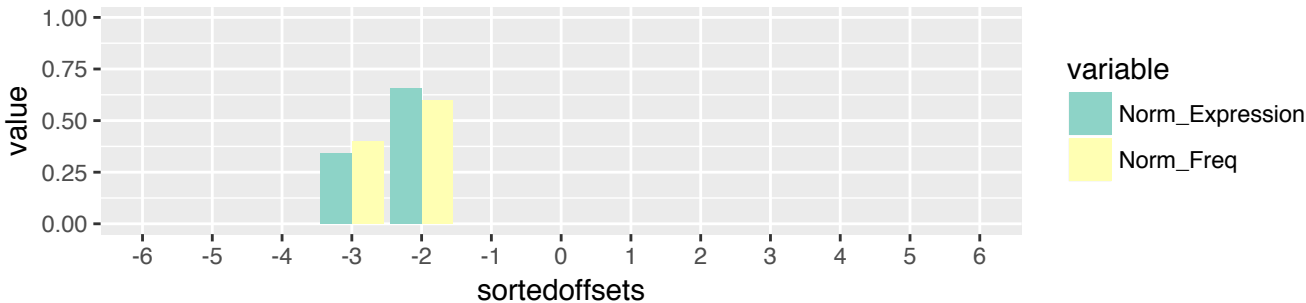

SARC (n=490)  
i-tRF & exclusive (n=95)  
5' terminus relative to 3' stem of D-loop (n=5)

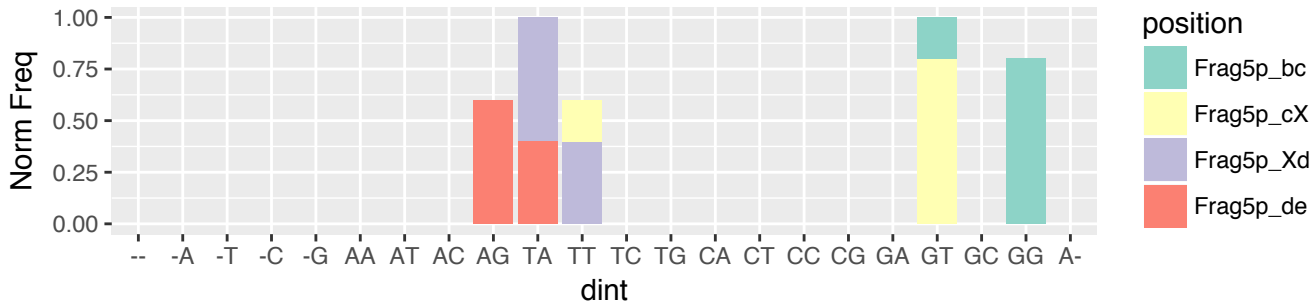

SARC (n=490)  
i-tRF & exclusive (n=95)  
5' terminus relative to 3' stem of D-loop (n=5)

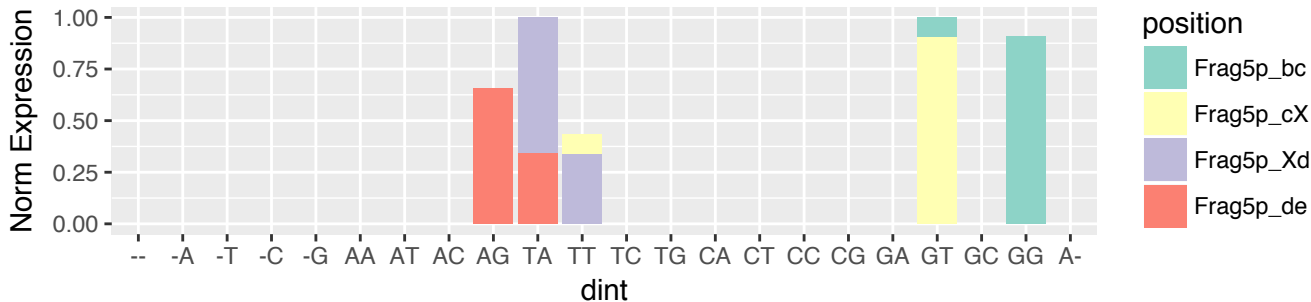

SARC (n=490)  
 i-tRF & exclusive (n=95)  
 5' terminus relative to 5' stem of A-loop (n=18)

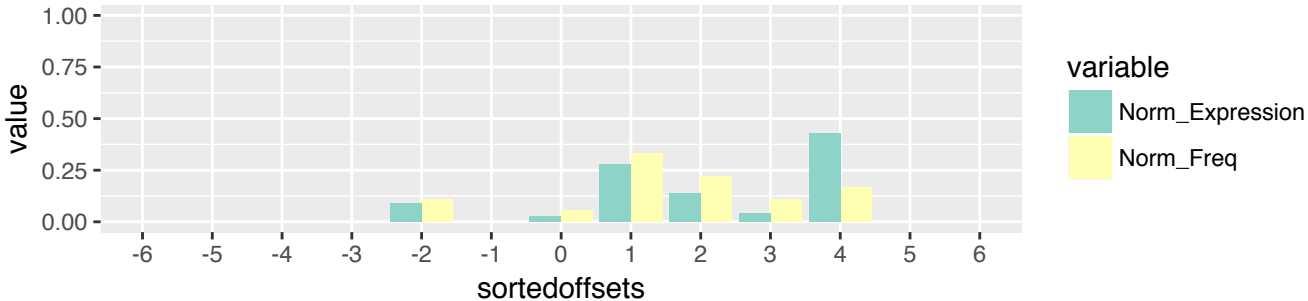

SARC (n=490)  
 i-tRF & exclusive (n=95)  
 5' terminus relative to 5' stem of A-loop (n=18)

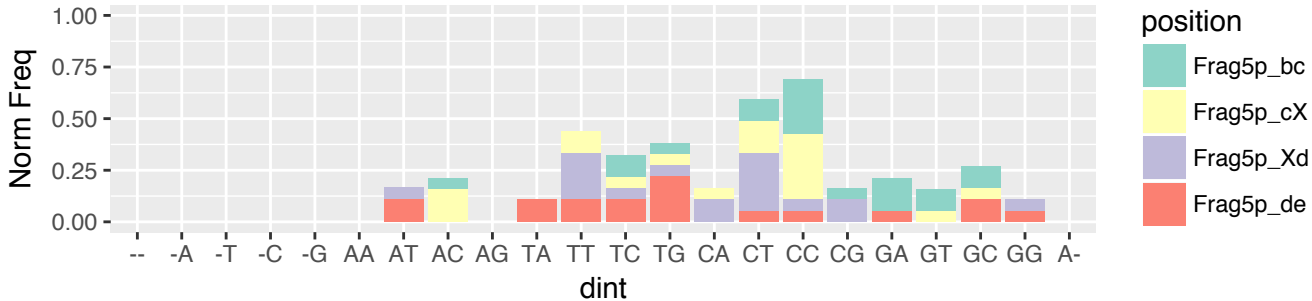

SARC (n=490)  
 i-tRF & exclusive (n=95)  
 5' terminus relative to 5' stem of A-loop (n=18)

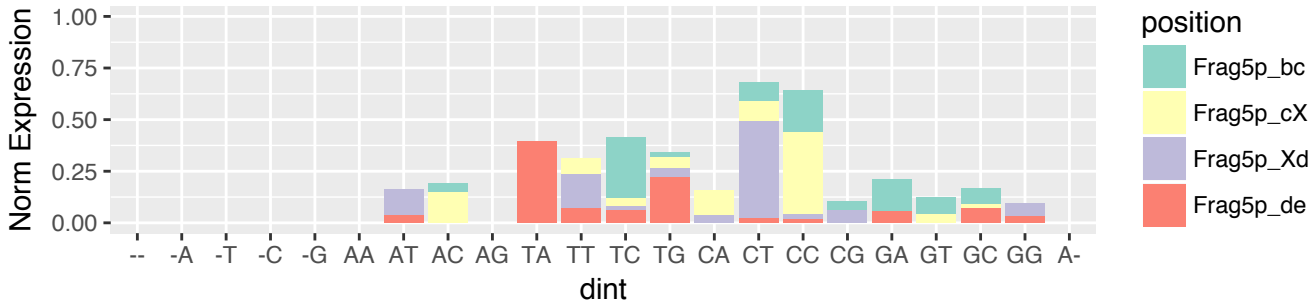

SARC (n=490)  
i-tRF & exclusive (n=95)  
5' terminus relative to 3' stem of A-loop (n=32)

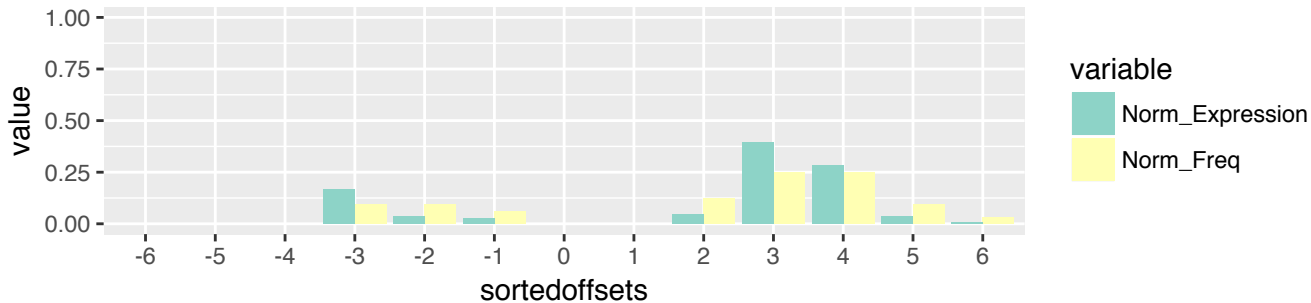

SARC (n=490)  
i-tRF & exclusive (n=95)  
5' terminus relative to 3' stem of A-loop (n=32)

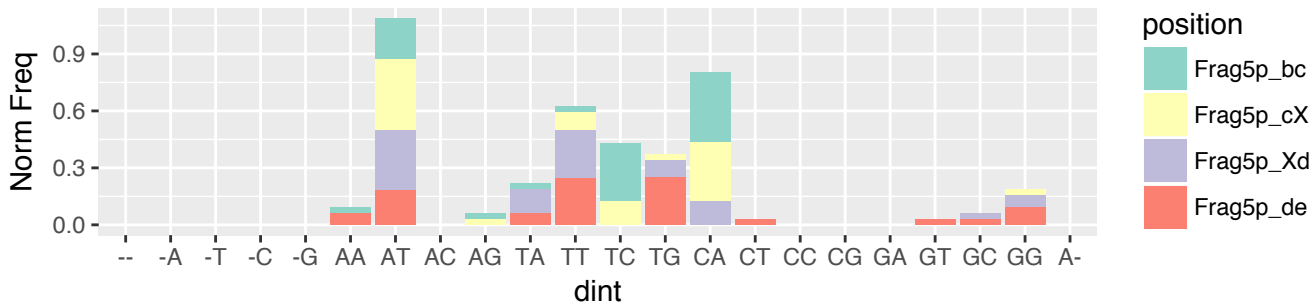

SARC (n=490)  
i-tRF & exclusive (n=95)  
5' terminus relative to 3' stem of A-loop (n=32)

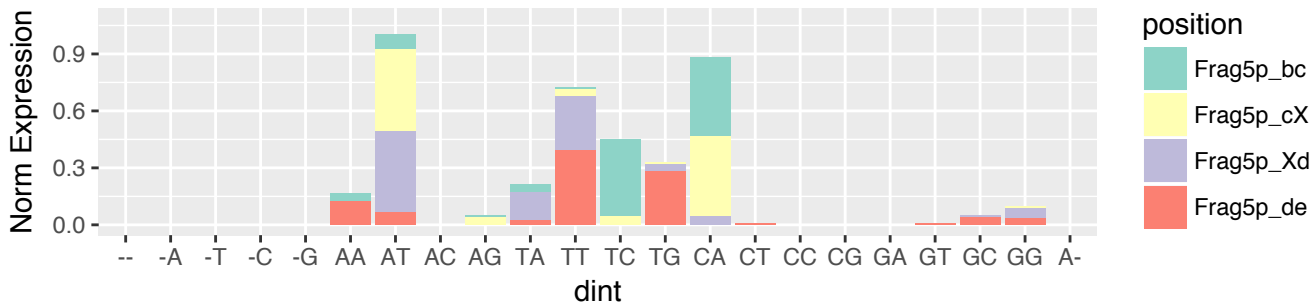

SARC (n=490)  
i-tRF & exclusive (n=95)  
5' terminus relative to 5' stem of T-loop (n=4)

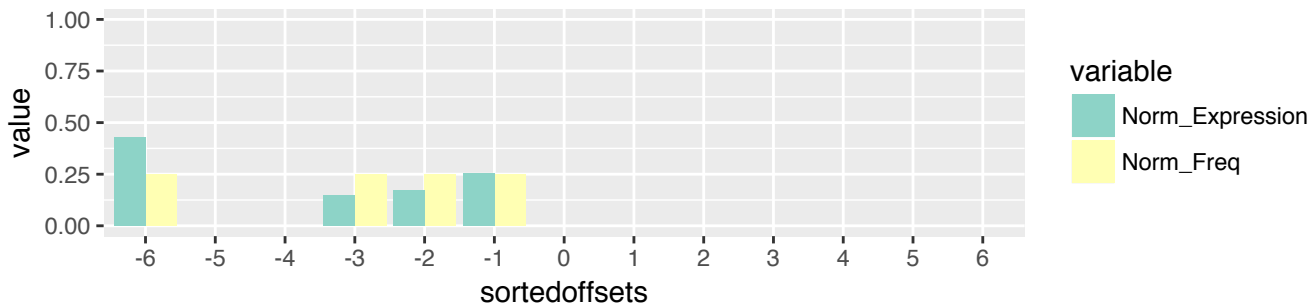

SARC (n=490)  
i-tRF & exclusive (n=95)  
5' terminus relative to 5' stem of T-loop (n=4)

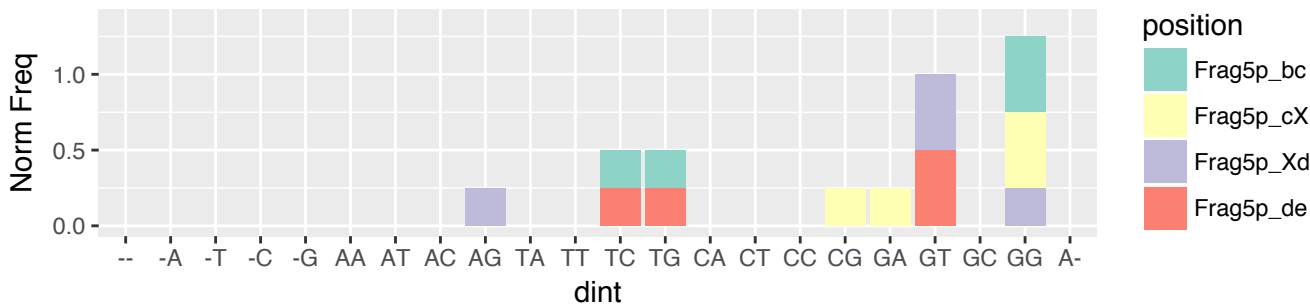

SARC (n=490)  
i-tRF & exclusive (n=95)  
5' terminus relative to 5' stem of T-loop (n=4)

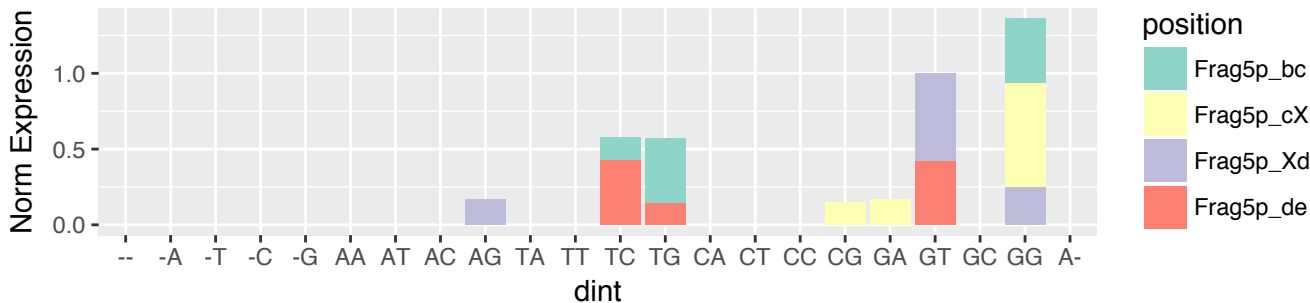

SARC (n=490)  
 i-tRF & exclusive (n=95)  
 3' terminus relative to 5' stem of A-loop (n=29)

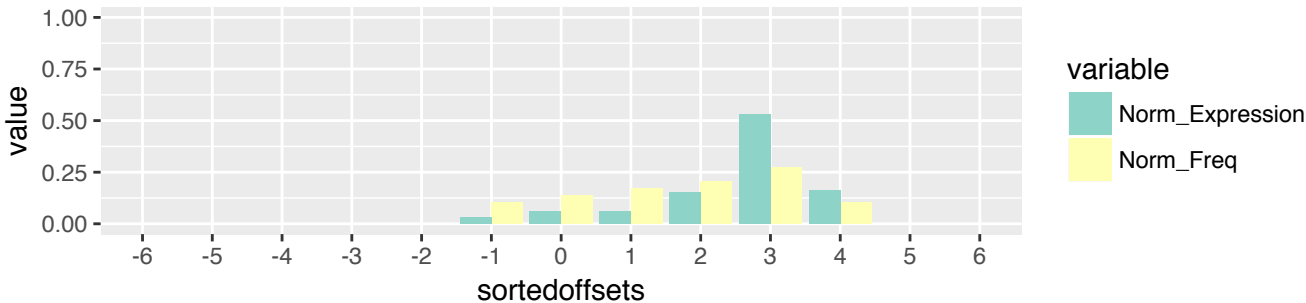

SARC (n=490)  
 i-tRF & exclusive (n=95)  
 3' terminus relative to 5' stem of A-loop (n=29)

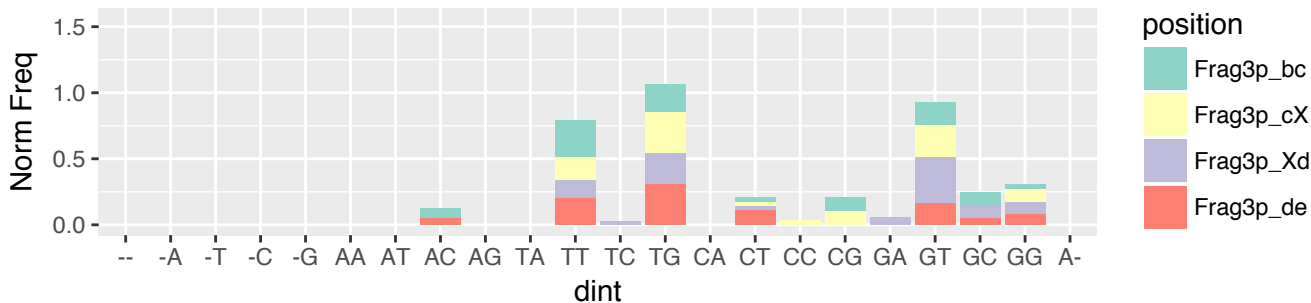

SARC (n=490)  
 i-tRF & exclusive (n=95)  
 3' terminus relative to 5' stem of A-loop (n=29)

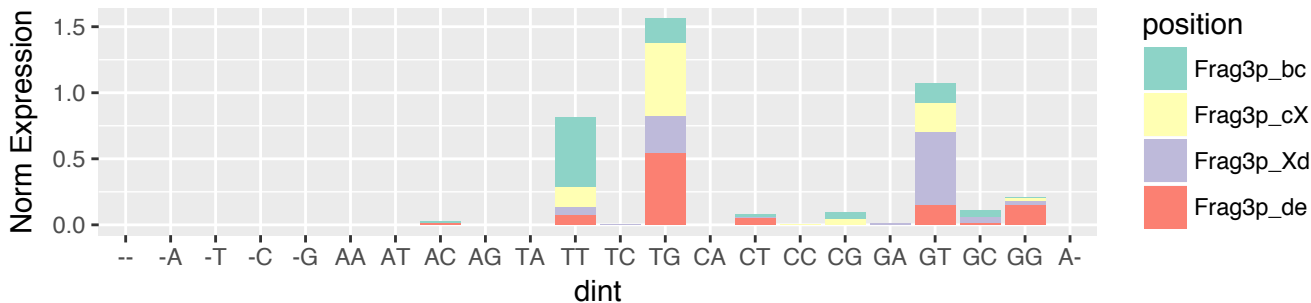

SARC (n=490)  
 i-tRF & exclusive (n=95)  
 3' terminus relative to 3' stem of A-loop (n=14)

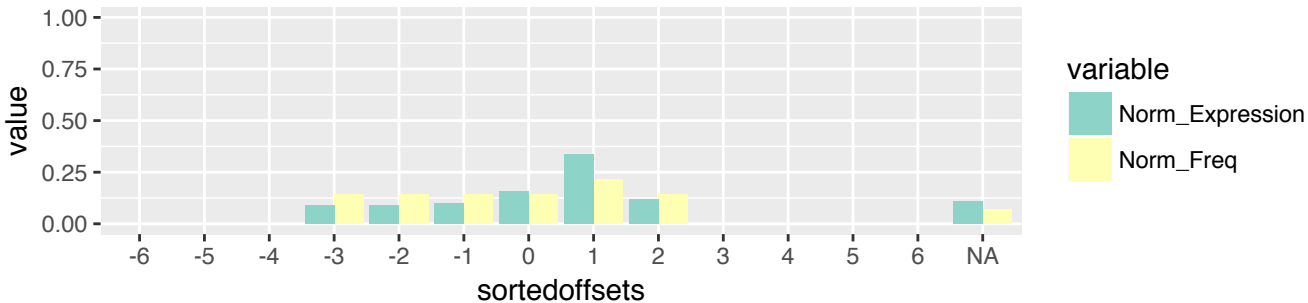

SARC (n=490)  
 i-tRF & exclusive (n=95)  
 3' terminus relative to 3' stem of A-loop (n=14)

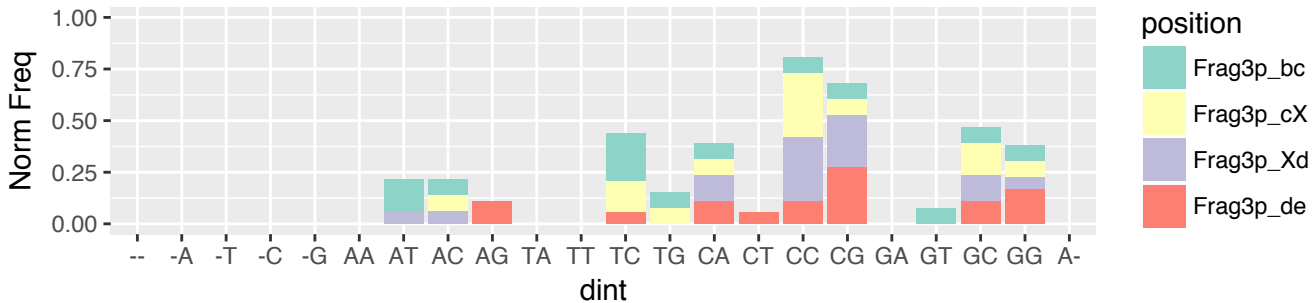

SARC (n=490)  
 i-tRF & exclusive (n=95)  
 3' terminus relative to 3' stem of A-loop (n=14)

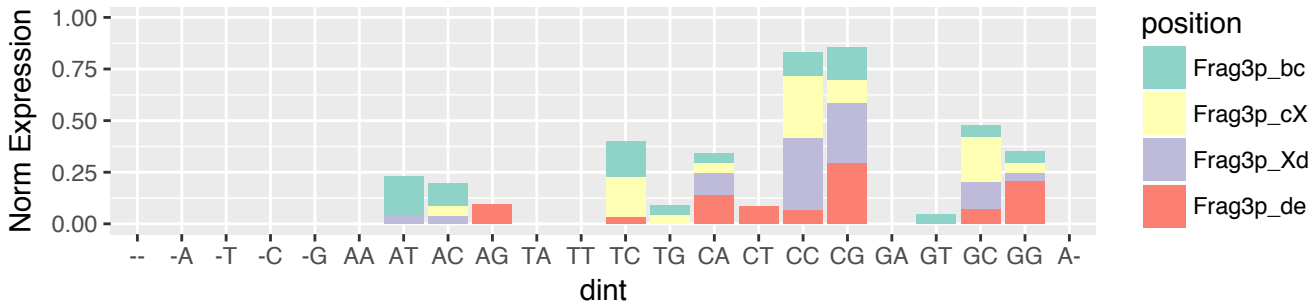

SARC (n=490)  
i-tRF & exclusive (n=95)  
3' terminus relative to 5' stem of T-loop (n=20)

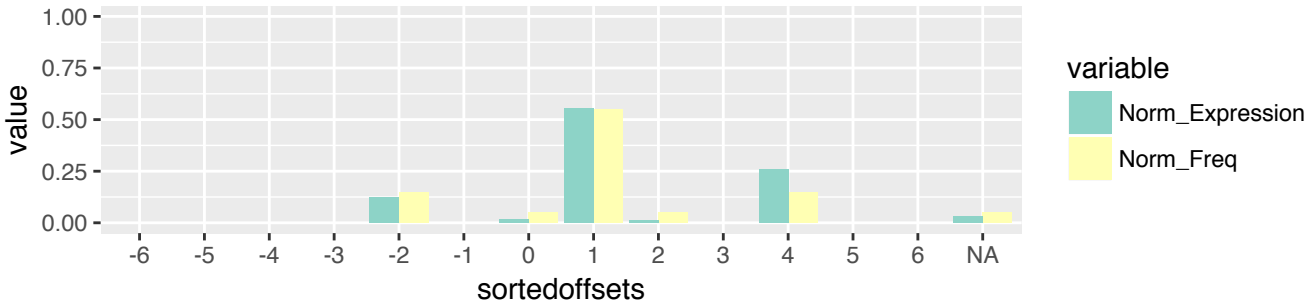

SARC (n=490)  
i-tRF & exclusive (n=95)  
3' terminus relative to 5' stem of T-loop (n=20)

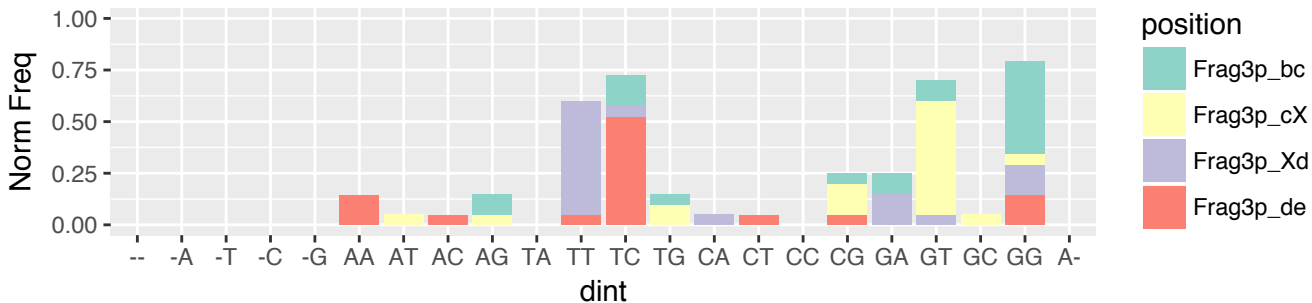

SARC (n=490)  
i-tRF & exclusive (n=95)  
3' terminus relative to 5' stem of T-loop (n=20)

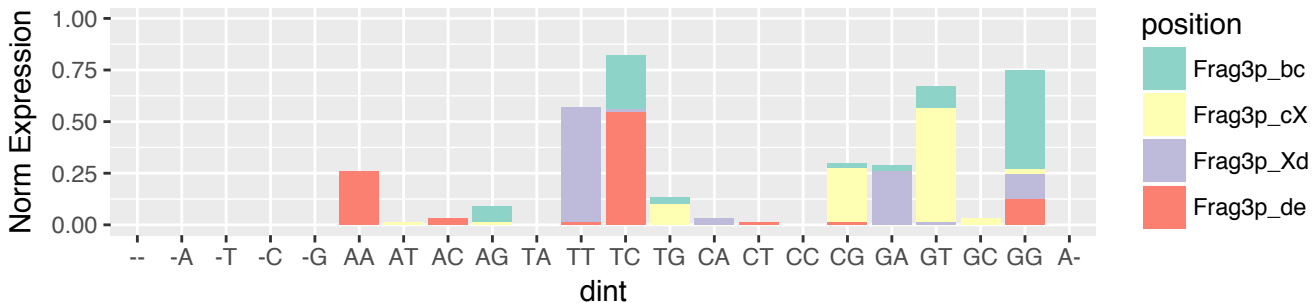

SARC (n=490)  
i-tRF & exclusive (n=95)  
3' terminus relative to 3' stem of T-loop (n=26)

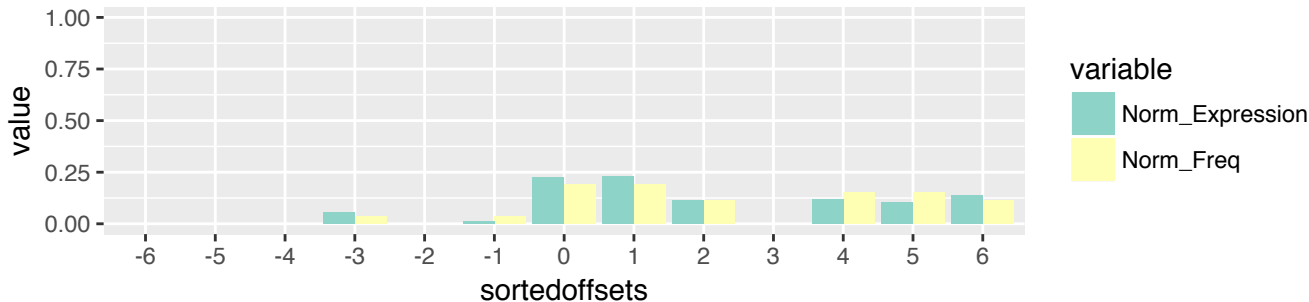

SARC (n=490)  
i-tRF & exclusive (n=95)  
3' terminus relative to 3' stem of T-loop (n=26)

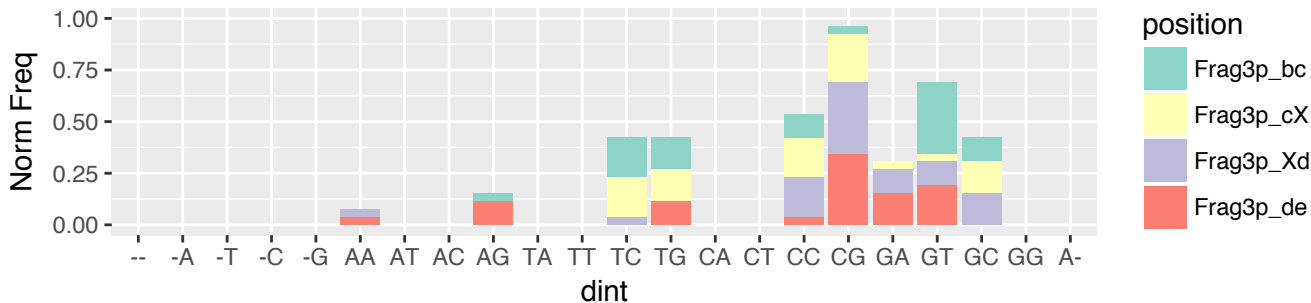

SARC (n=490)  
i-tRF & exclusive (n=95)  
3' terminus relative to 3' stem of T-loop (n=26)

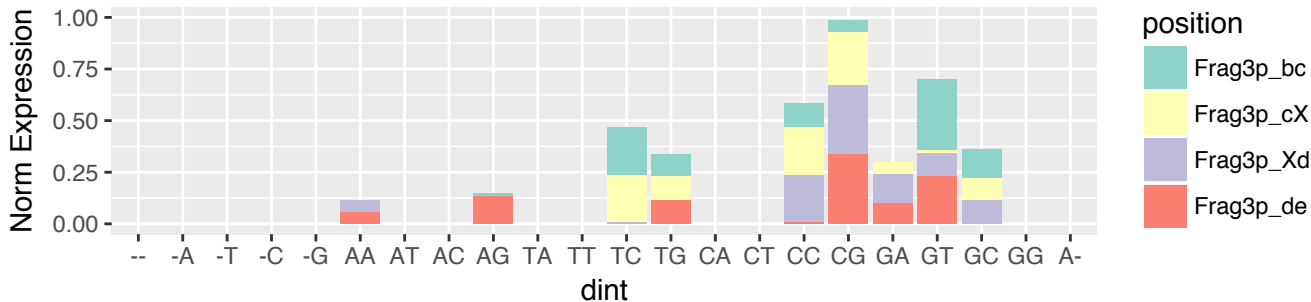



SARC (n=490)  
 i-tRF & exclusive (n=95)  
 3' terminus relative to 3' end of the tRNA (n=7)

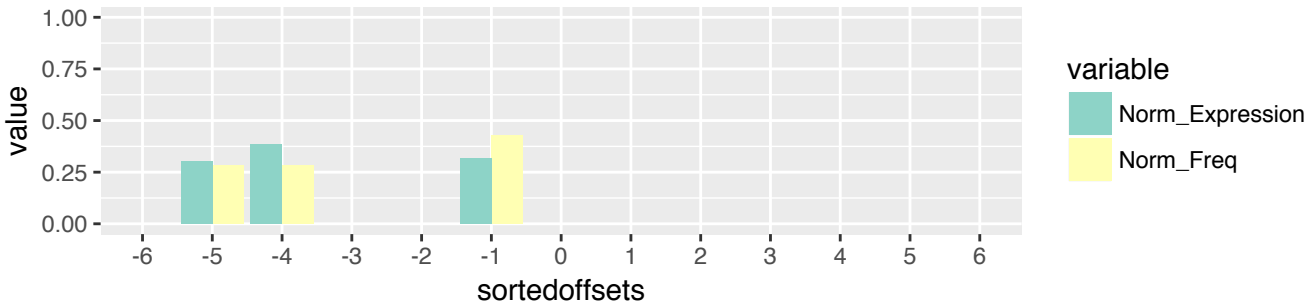

SARC (n=490)  
 i-tRF & exclusive (n=95)  
 3' terminus relative to 3' end of the tRNA (n=7)

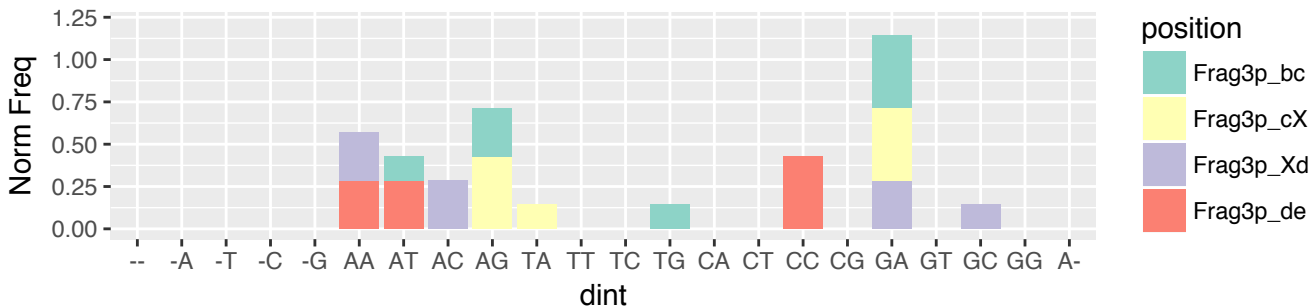

SARC (n=490)  
 i-tRF & exclusive (n=95)  
 3' terminus relative to 3' end of the tRNA (n=7)

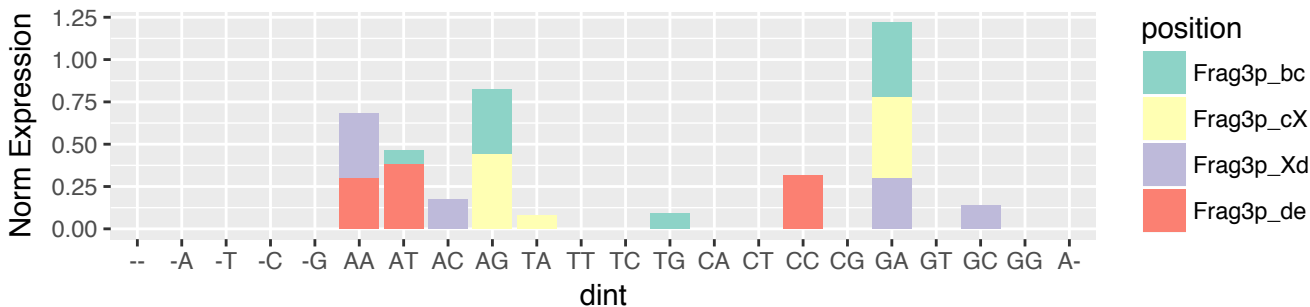

SARC (n=490)  
 3'-tRF & exclusive (n=93)  
 5' terminus relative to 5' stem of T-loop (n=66)

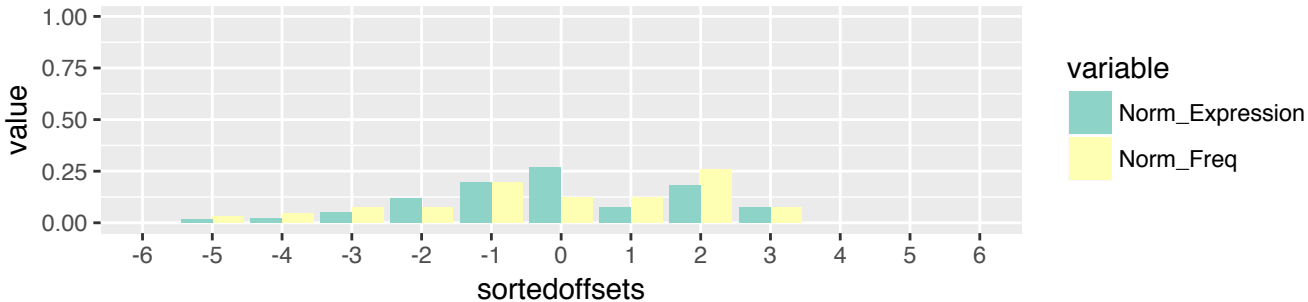

SARC (n=490)  
 3'-tRF & exclusive (n=93)  
 5' terminus relative to 5' stem of T-loop (n=66)

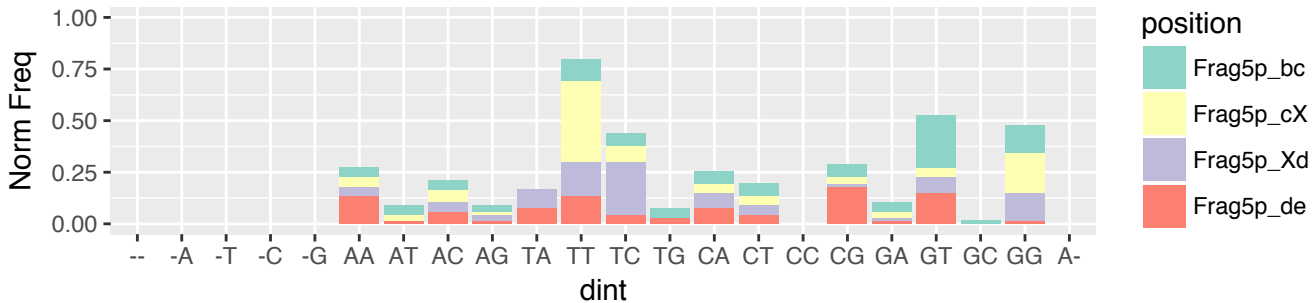

SARC (n=490)  
 3'-tRF & exclusive (n=93)  
 5' terminus relative to 5' stem of T-loop (n=66)

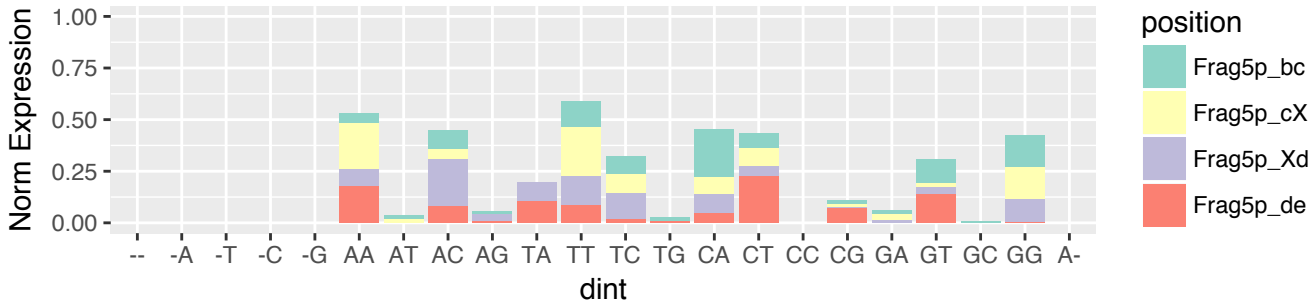

SARC (n=490)  
 3'-tRF & exclusive (n=93)  
 5' terminus relative to 3' stem of T-loop (n=27)

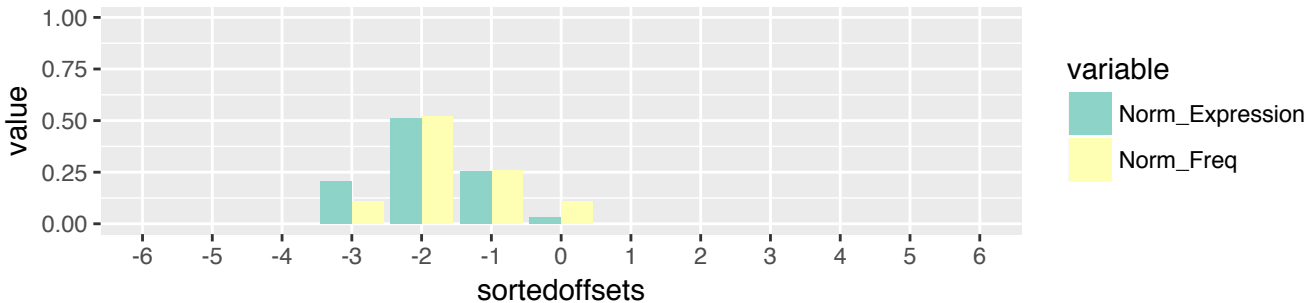

SARC (n=490)  
 3'-tRF & exclusive (n=93)  
 5' terminus relative to 3' stem of T-loop (n=27)

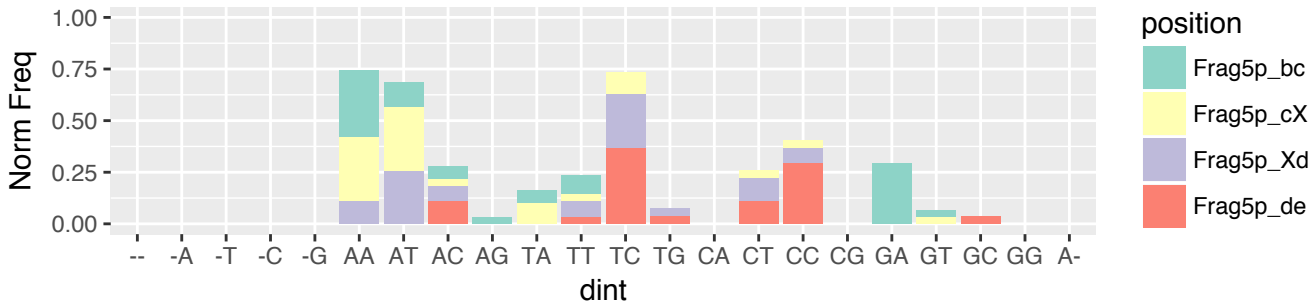

SARC (n=490)  
 3'-tRF & exclusive (n=93)  
 5' terminus relative to 3' stem of T-loop (n=27)

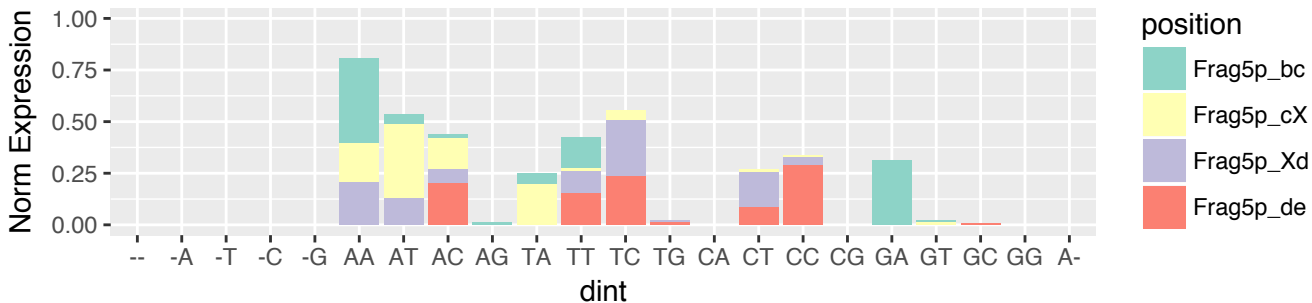

SARC (n=490)  
 3'-tRF & exclusive (n=93)  
 3' terminus relative to 3' end of the tRNA (n=93)

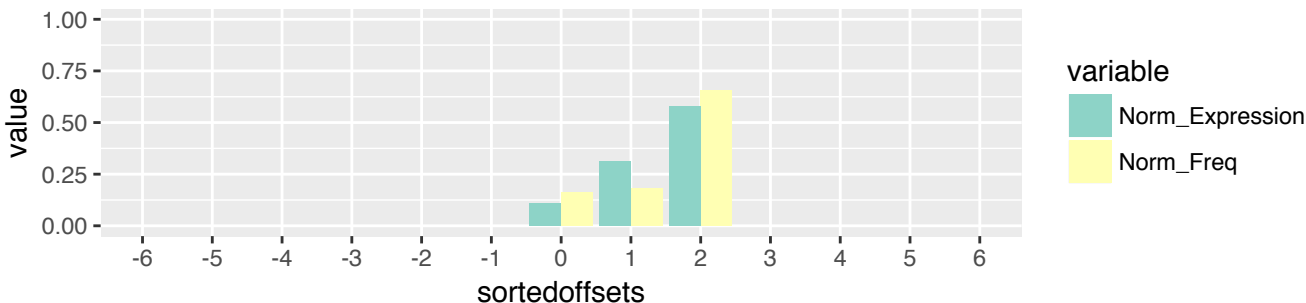

SARC (n=490)  
 3'-tRF & exclusive (n=93)  
 3' terminus relative to 3' end of the tRNA (n=93)

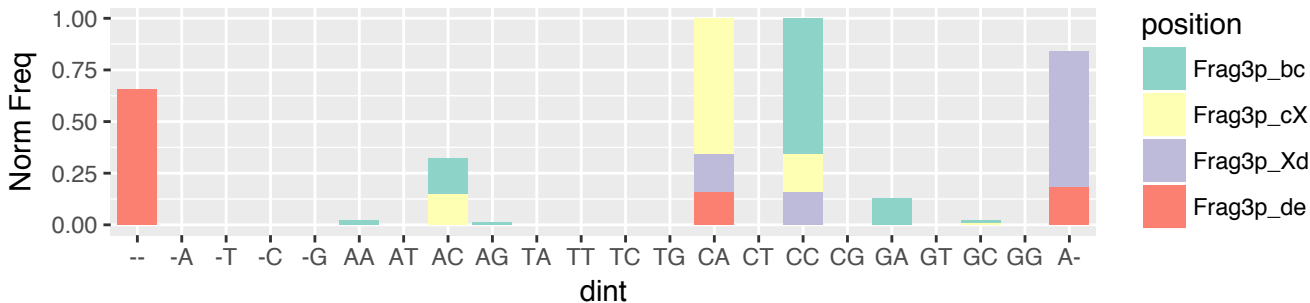

SARC (n=490)  
 3'-tRF & exclusive (n=93)  
 3' terminus relative to 3' end of the tRNA (n=93)

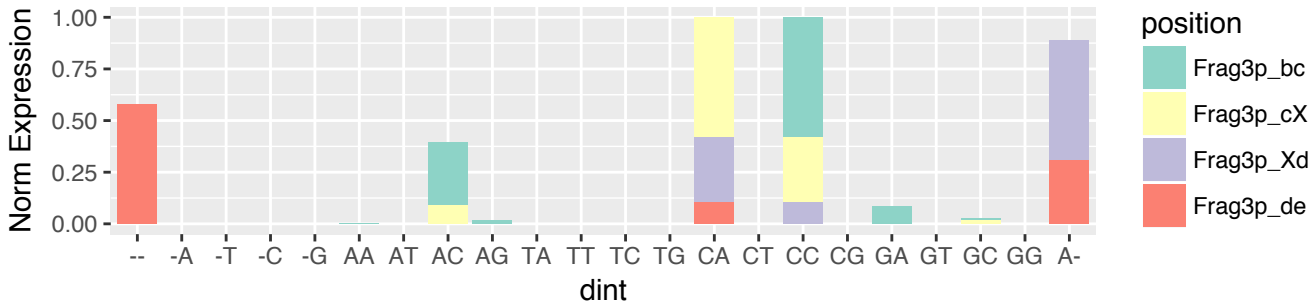

SKCM (n=2038)  
 5'-half & exclusive (n=4)  
 5' terminus relative to 5' end of the tRNA (n=4)

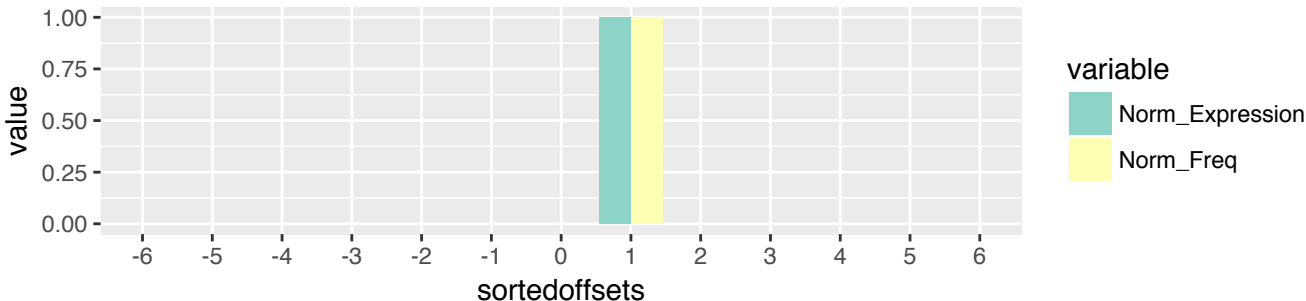

SKCM (n=2038)  
 5'-half & exclusive (n=4)  
 5' terminus relative to 5' end of the tRNA (n=4)

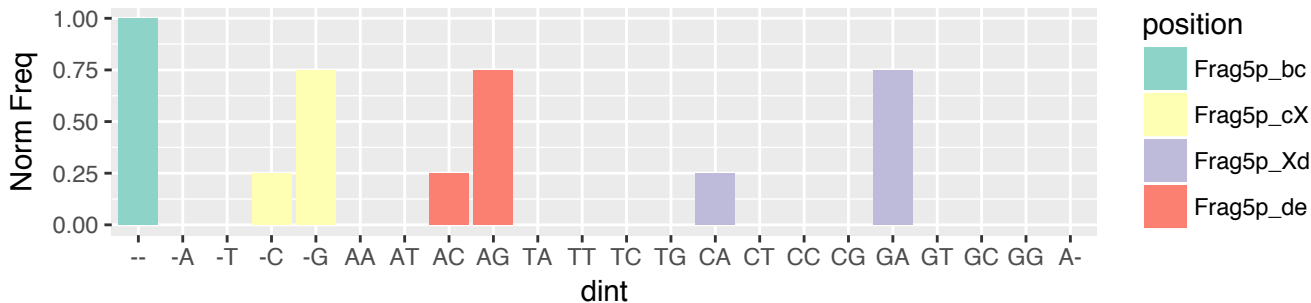

SKCM (n=2038)  
 5'-half & exclusive (n=4)  
 5' terminus relative to 5' end of the tRNA (n=4)

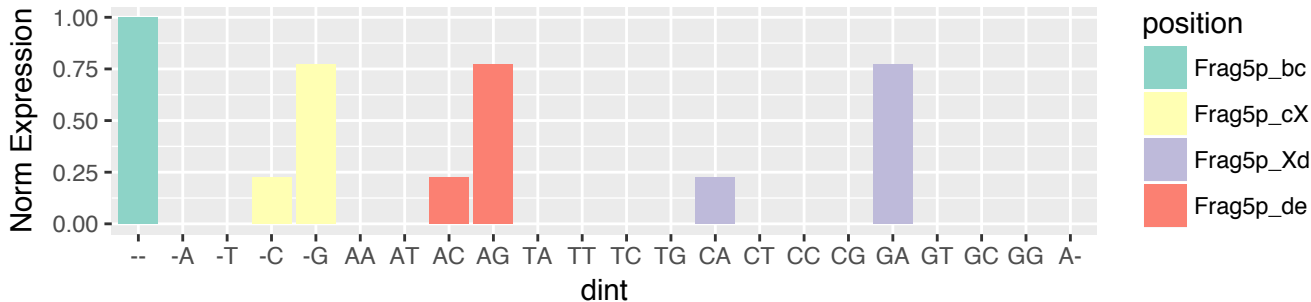

SKCM (n=2038)

5'-half & exclusive (n=4)

3' terminus relative to 5' stem of A-loop (n=4)

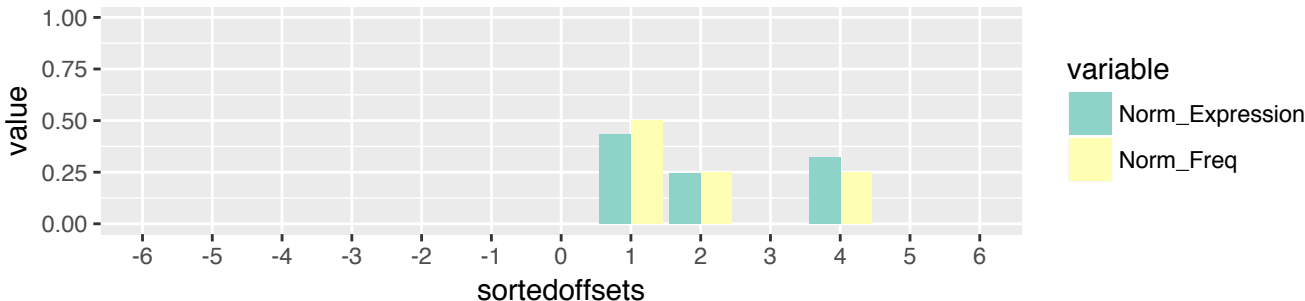

SKCM (n=2038)

5'-half & exclusive (n=4)

3' terminus relative to 5' stem of A-loop (n=4)

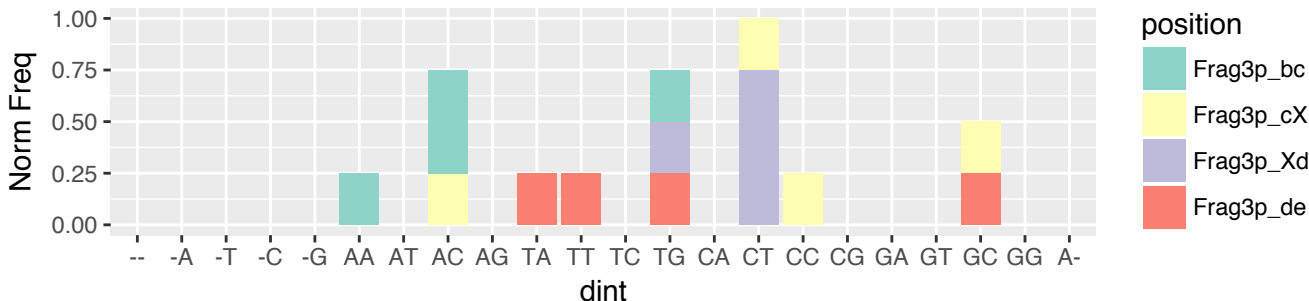

SKCM (n=2038)

5'-half & exclusive (n=4)

3' terminus relative to 5' stem of A-loop (n=4)

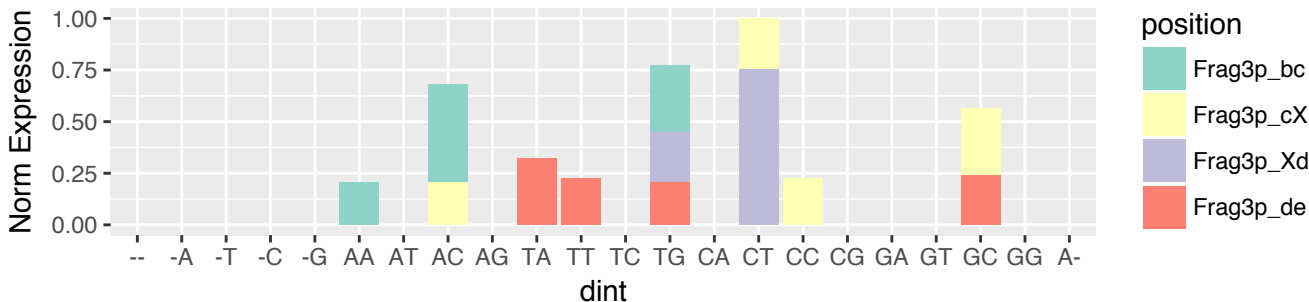

SKCM (n=2038)  
 5'-tRF & exclusive (n=253)  
 5' terminus relative to 5' end of the tRNA (n=253)

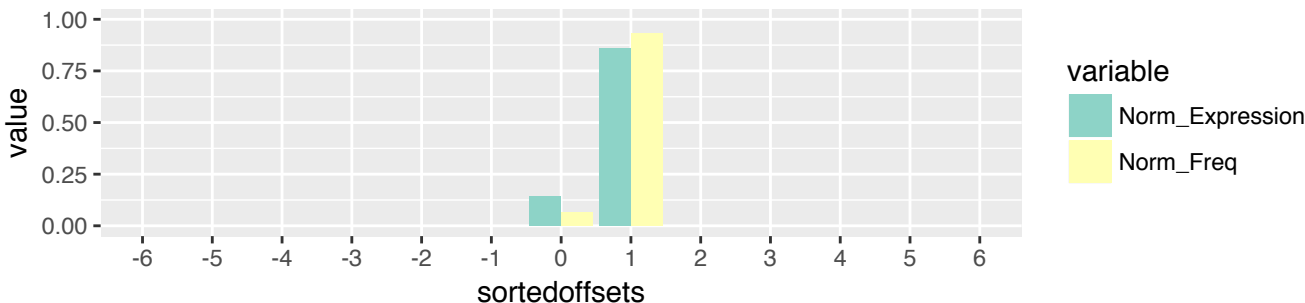

SKCM (n=2038)  
 5'-tRF & exclusive (n=253)  
 5' terminus relative to 5' end of the tRNA (n=253)

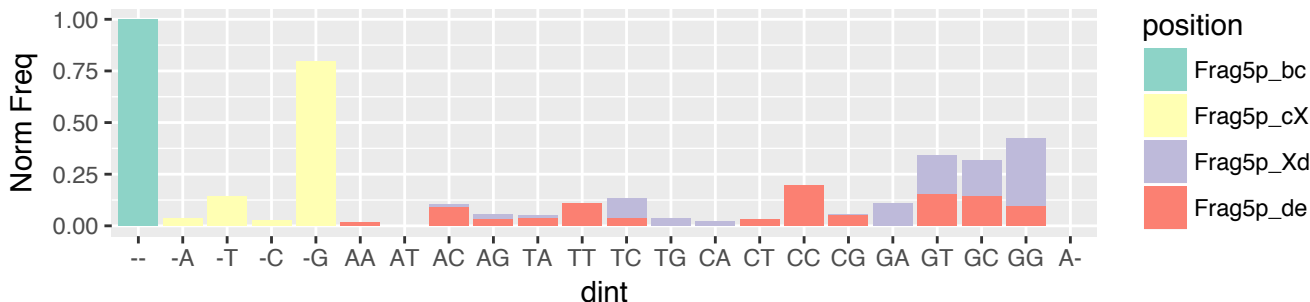

SKCM (n=2038)  
 5'-tRF & exclusive (n=253)  
 5' terminus relative to 5' end of the tRNA (n=253)

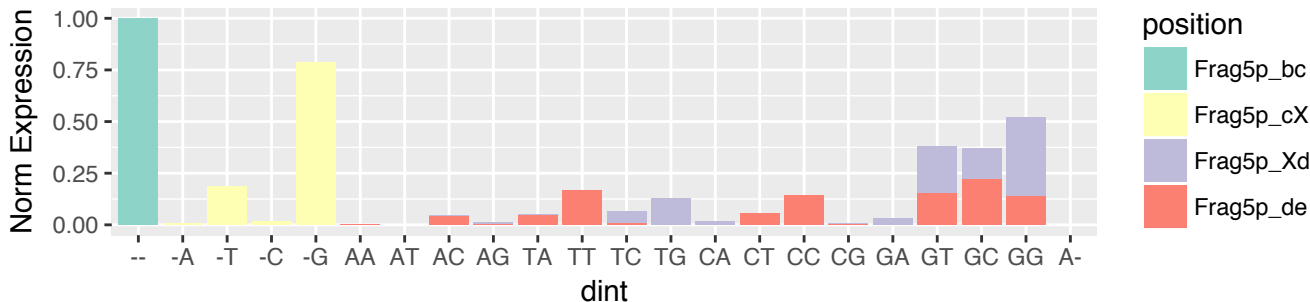

SKCM (n=2038)  
 5'-tRF & exclusive (n=253)  
 3' terminus relative to 5' stem of D-loop (n=21)

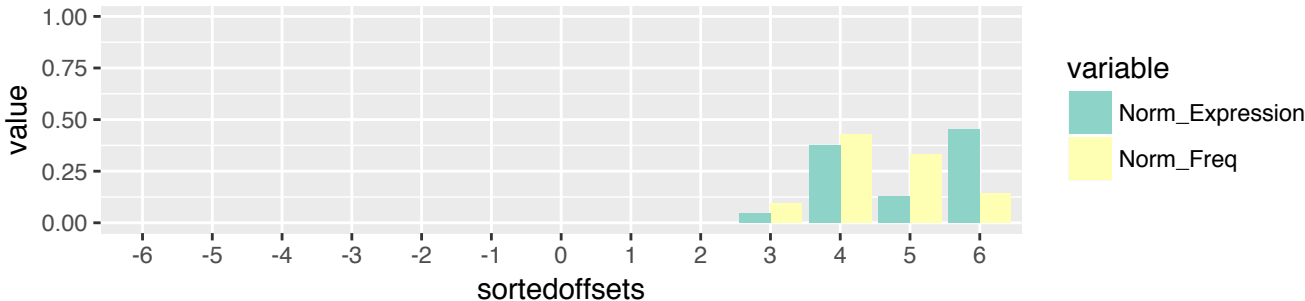

SKCM (n=2038)  
 5'-tRF & exclusive (n=253)  
 3' terminus relative to 5' stem of D-loop (n=21)

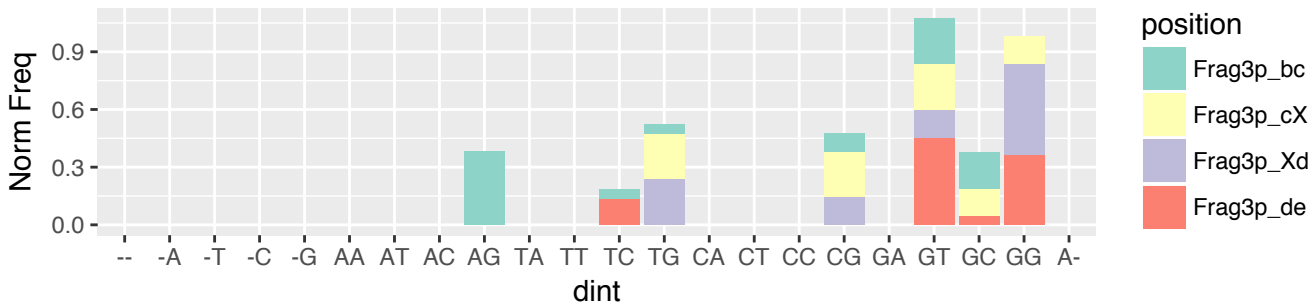

SKCM (n=2038)  
 5'-tRF & exclusive (n=253)  
 3' terminus relative to 5' stem of D-loop (n=21)

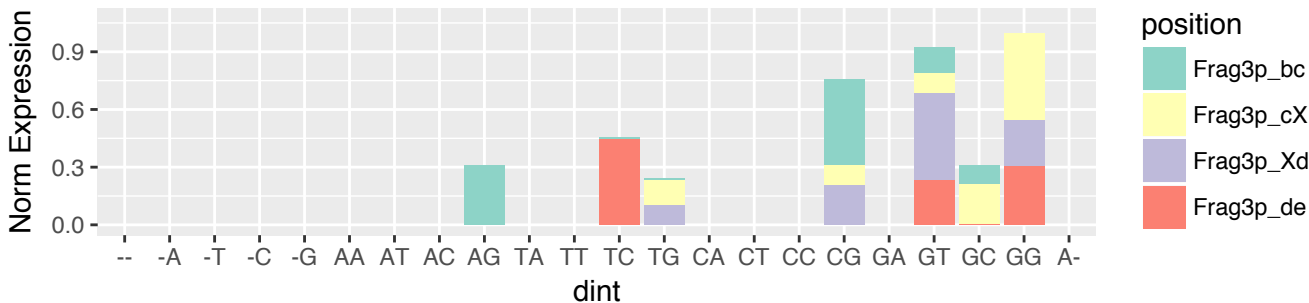



SKCM (n=2038)  
 5'-tRF & exclusive (n=253)  
 3' terminus relative to 3' stem of D-loop (n=216)

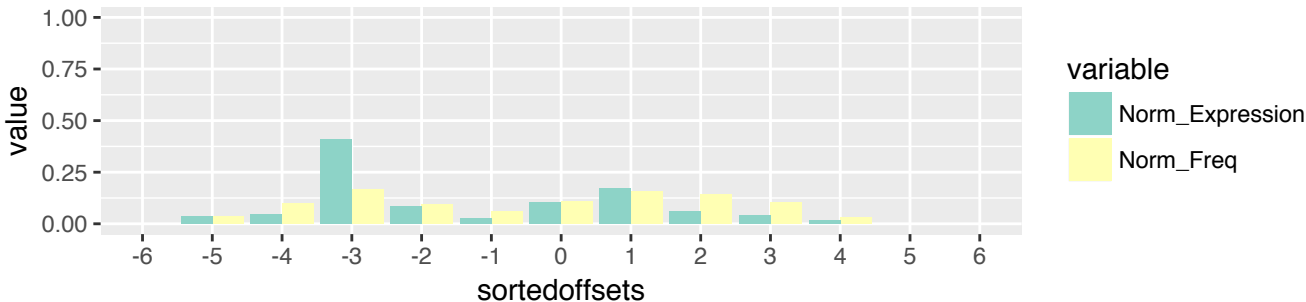

SKCM (n=2038)  
 5'-tRF & exclusive (n=253)  
 3' terminus relative to 3' stem of D-loop (n=216)

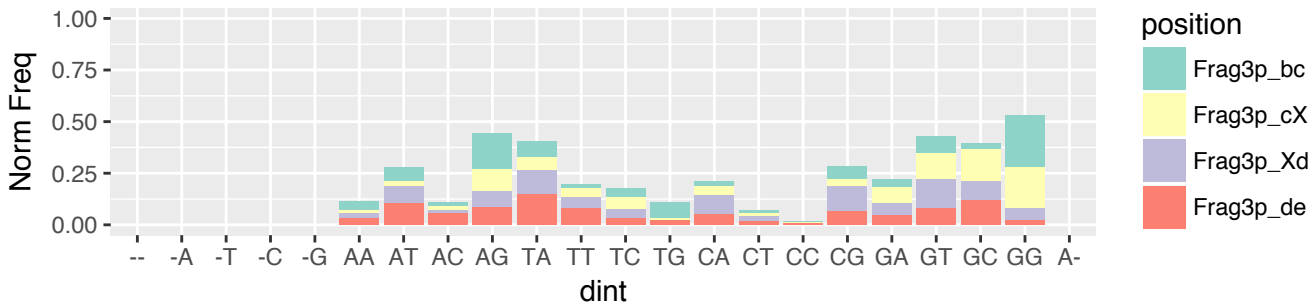

SKCM (n=2038)  
 5'-tRF & exclusive (n=253)  
 3' terminus relative to 3' stem of D-loop (n=216)

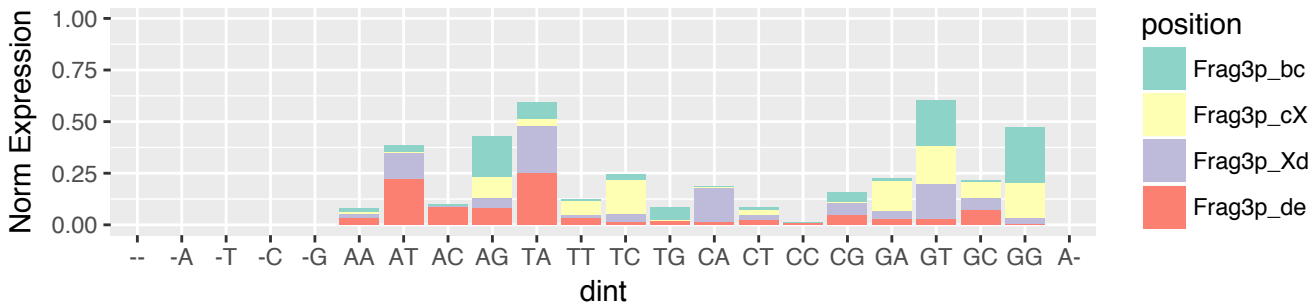

SKCM (n=2038)  
 5'-tRF & exclusive (n=253)  
 3' terminus relative to 5' stem of A-loop (n=11)

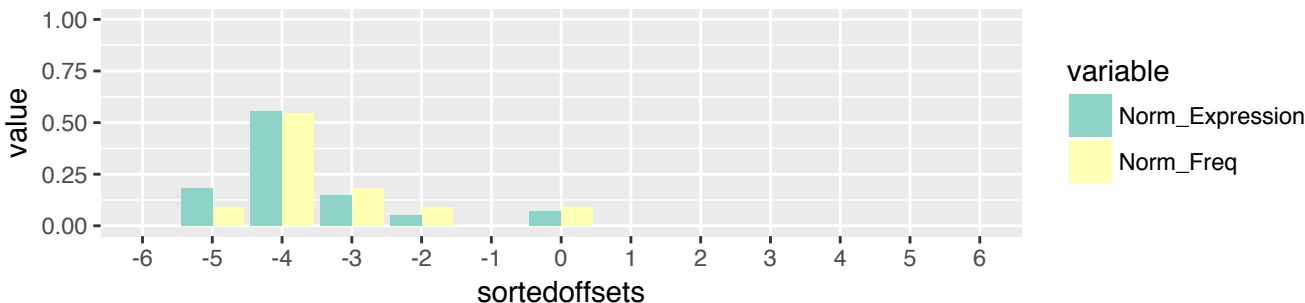

SKCM (n=2038)  
 5'-tRF & exclusive (n=253)  
 3' terminus relative to 5' stem of A-loop (n=11)

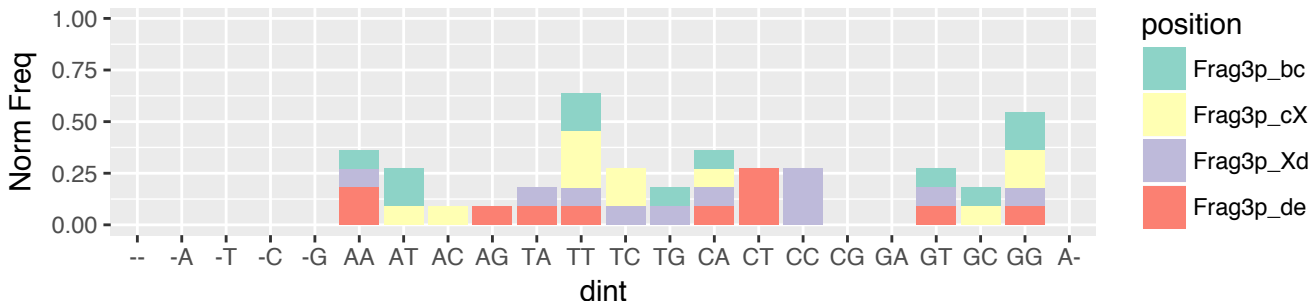

SKCM (n=2038)  
 5'-tRF & exclusive (n=253)  
 3' terminus relative to 5' stem of A-loop (n=11)

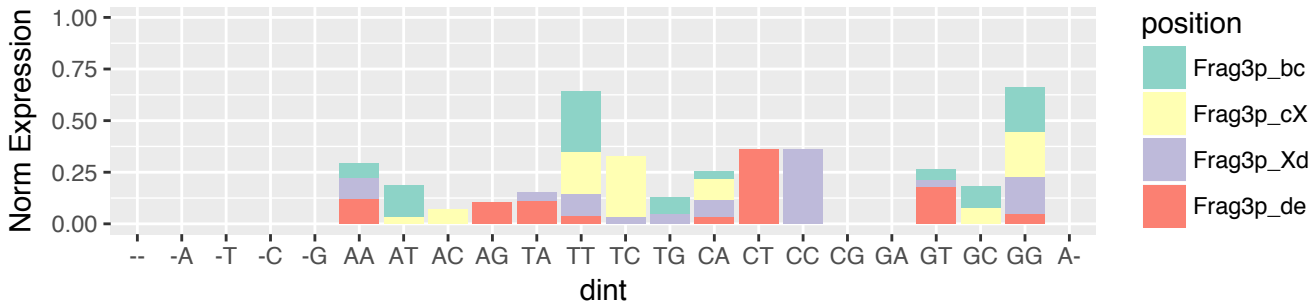

SKCM (n=2038)  
 5'-tRF & exclusive (n=253)  
 3' terminus relative to 3' stem of A-loop (n=5)

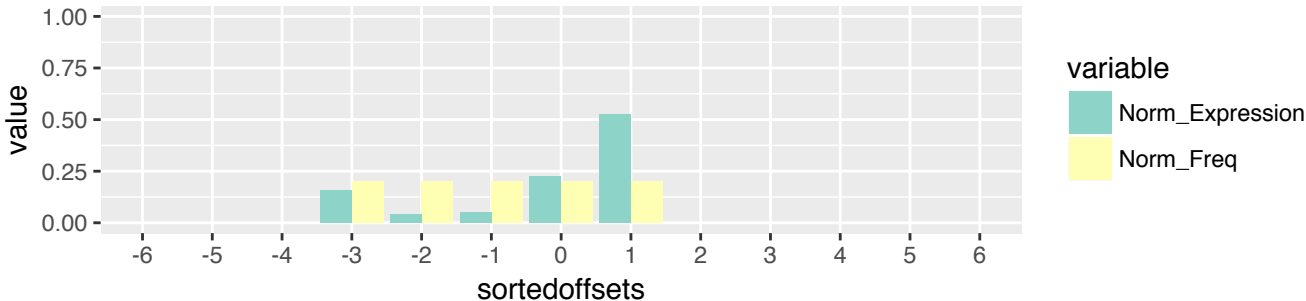

SKCM (n=2038)  
 5'-tRF & exclusive (n=253)  
 3' terminus relative to 3' stem of A-loop (n=5)



SKCM (n=2038)  
 5'-tRF & exclusive (n=253)  
 3' terminus relative to 3' stem of A-loop (n=5)

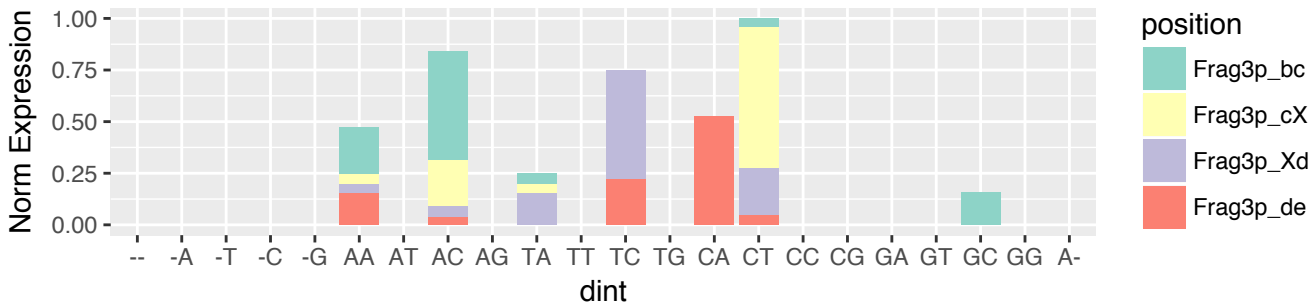

SKCM (n=2038)  
i-tRF & exclusive (n=510)  
5' terminus relative to 5' end of the tRNA (n=21)

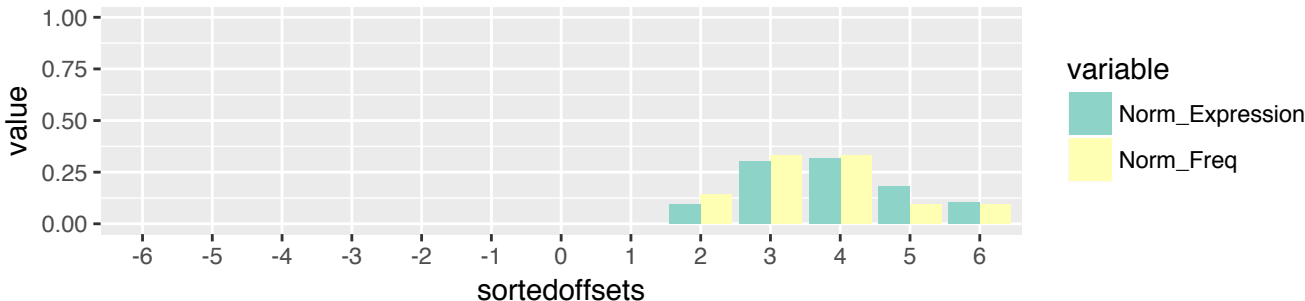

SKCM (n=2038)  
i-tRF & exclusive (n=510)  
5' terminus relative to 5' end of the tRNA (n=21)

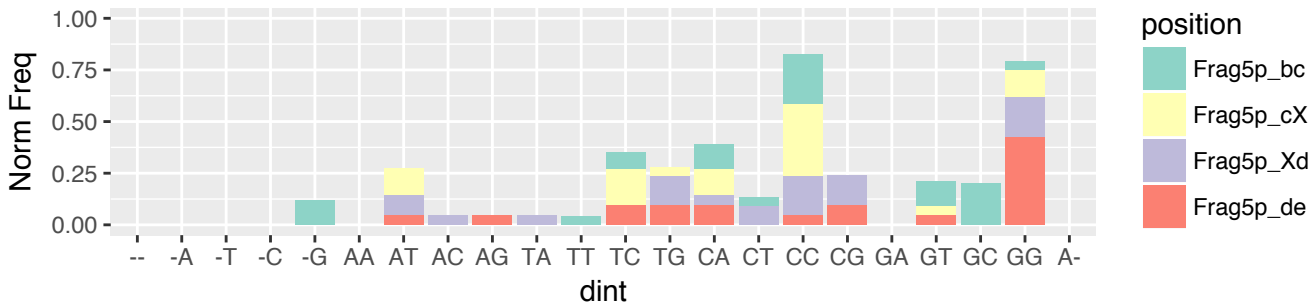

SKCM (n=2038)  
i-tRF & exclusive (n=510)  
5' terminus relative to 5' end of the tRNA (n=21)

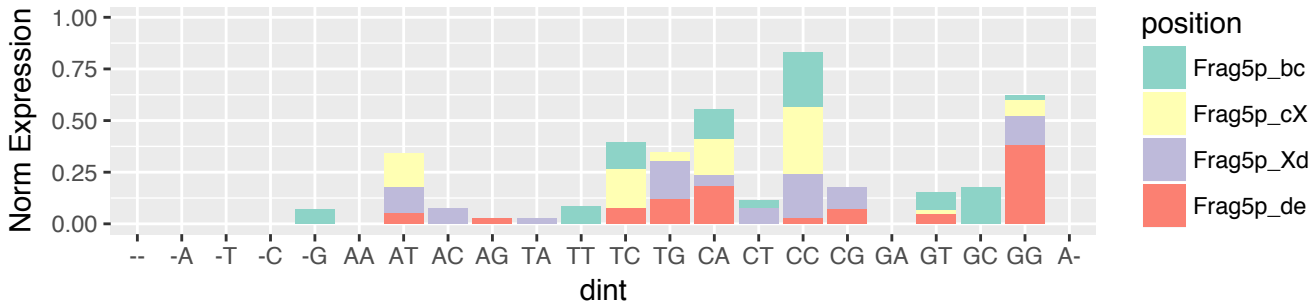

SKCM (n=2038)  
i-tRF & exclusive (n=510)  
5' terminus relative to 5' stem of D-loop (n=163)

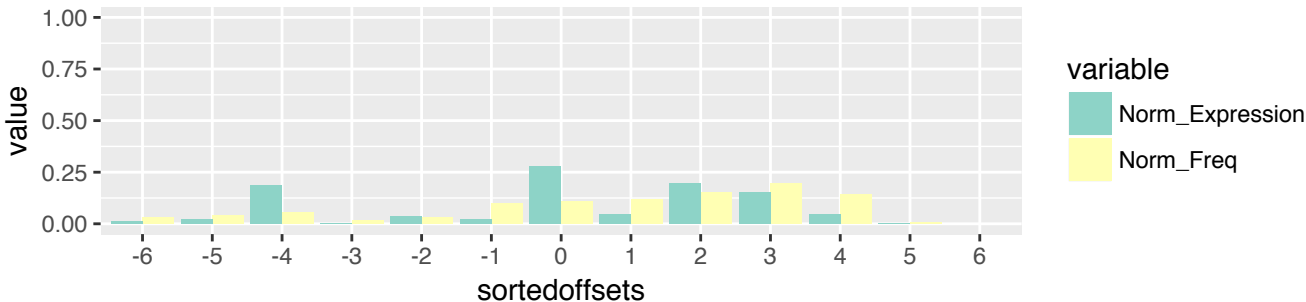

SKCM (n=2038)  
i-tRF & exclusive (n=510)  
5' terminus relative to 5' stem of D-loop (n=163)

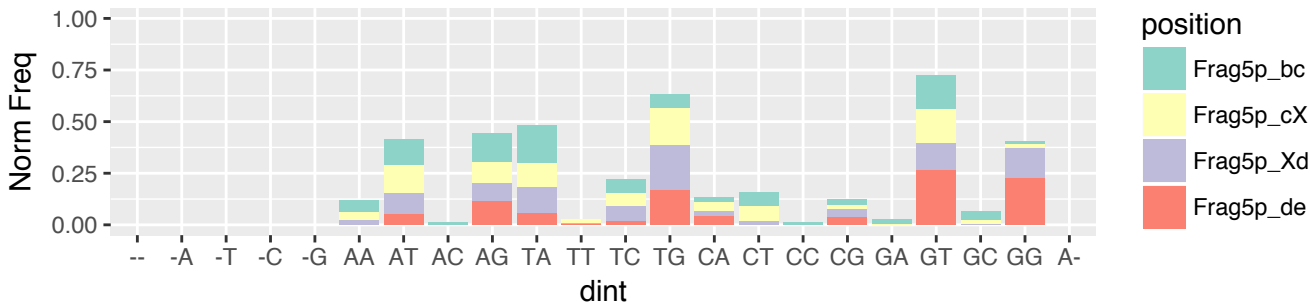

SKCM (n=2038)  
i-tRF & exclusive (n=510)  
5' terminus relative to 5' stem of D-loop (n=163)

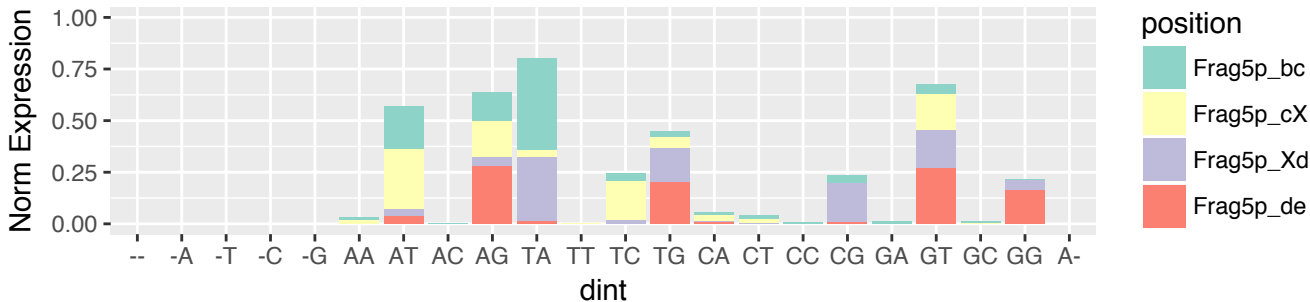

SKCM (n=2038)  
i-tRF & exclusive (n=510)  
5' terminus relative to 3' stem of D-loop (n=64)

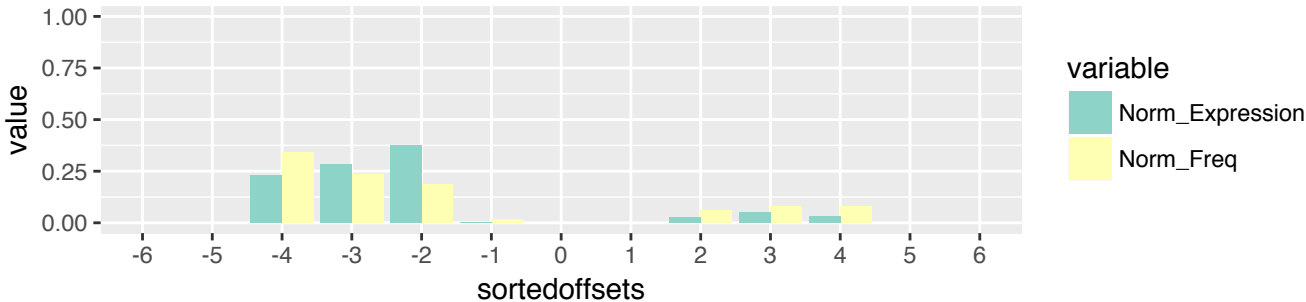

SKCM (n=2038)  
i-tRF & exclusive (n=510)  
5' terminus relative to 3' stem of D-loop (n=64)

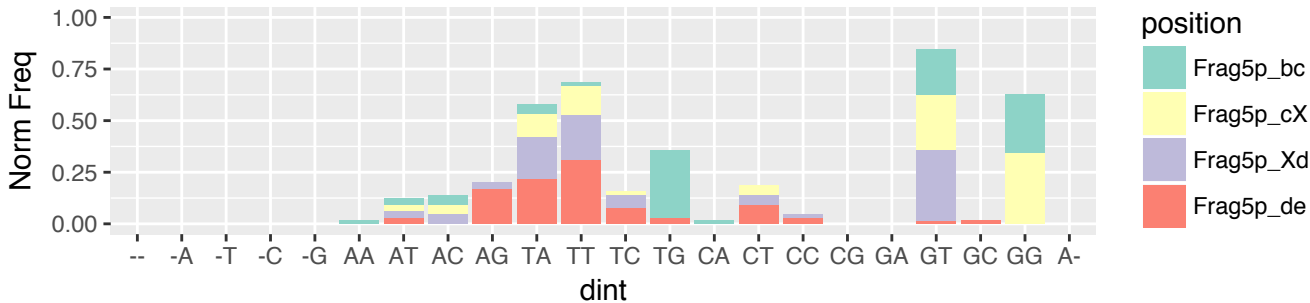

SKCM (n=2038)  
i-tRF & exclusive (n=510)  
5' terminus relative to 3' stem of D-loop (n=64)

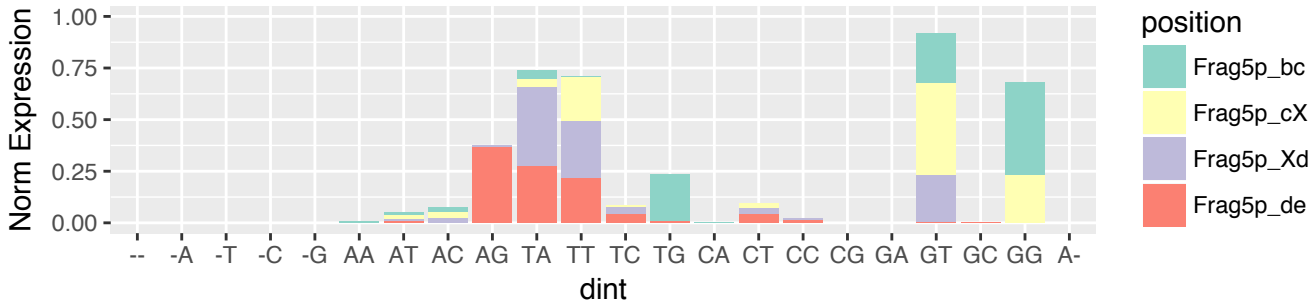

SKCM (n=2038)  
i-tRF & exclusive (n=510)  
5' terminus relative to 5' stem of A-loop (n=146)

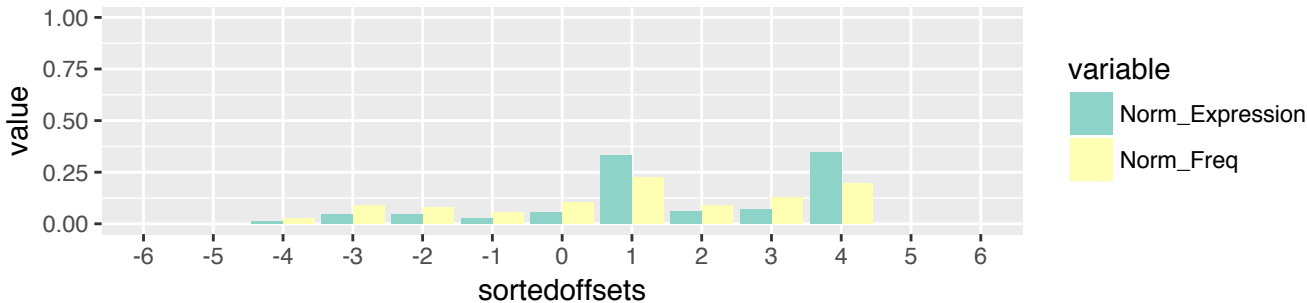

SKCM (n=2038)  
i-tRF & exclusive (n=510)  
5' terminus relative to 5' stem of A-loop (n=146)

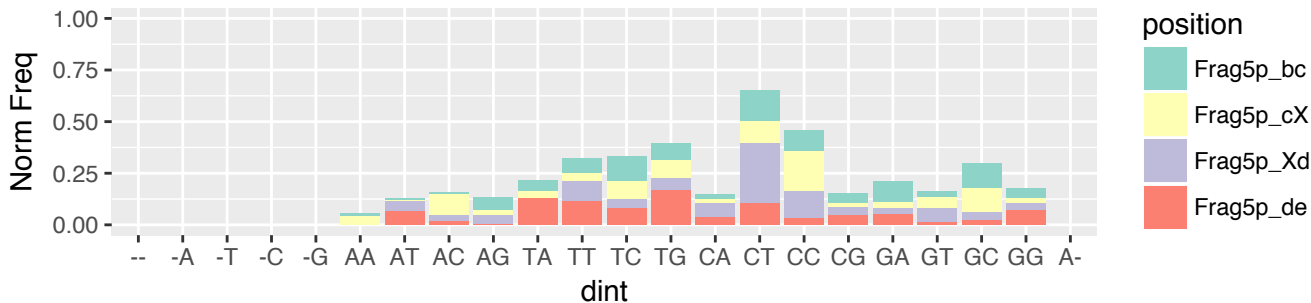

SKCM (n=2038)  
i-tRF & exclusive (n=510)  
5' terminus relative to 5' stem of A-loop (n=146)

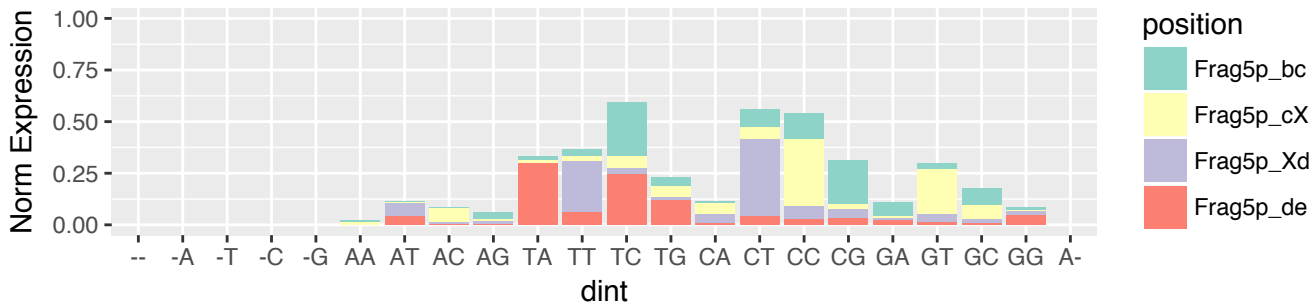

SKCM (n=2038)  
i-tRF & exclusive (n=510)  
5' terminus relative to 3' stem of A-loop (n=89)

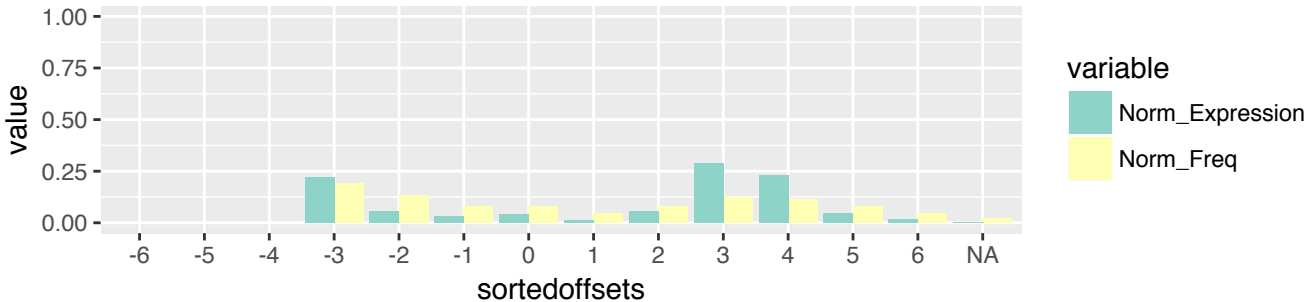

SKCM (n=2038)  
i-tRF & exclusive (n=510)  
5' terminus relative to 3' stem of A-loop (n=89)

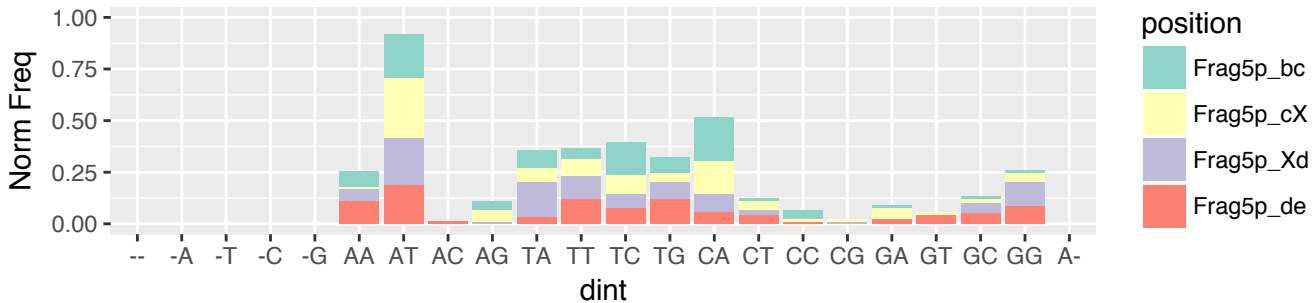

SKCM (n=2038)  
i-tRF & exclusive (n=510)  
5' terminus relative to 3' stem of A-loop (n=89)

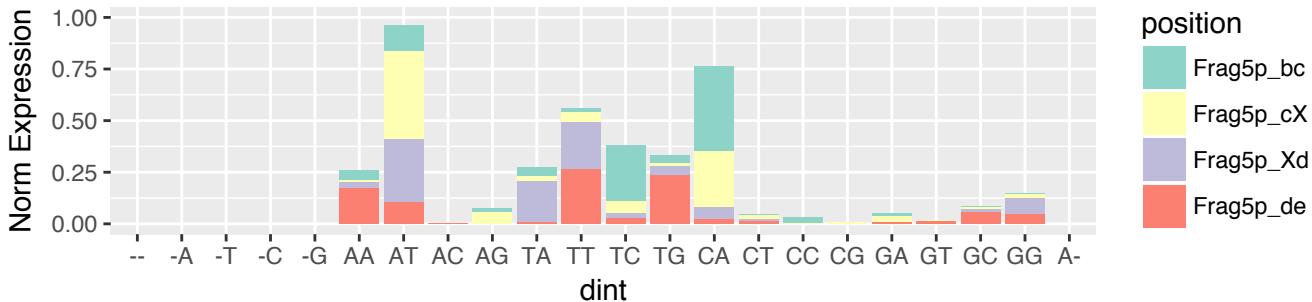



SKCM (n=2038)  
i-tRF & exclusive (n=510)  
5' terminus relative to 5' stem of T-loop (n=27)

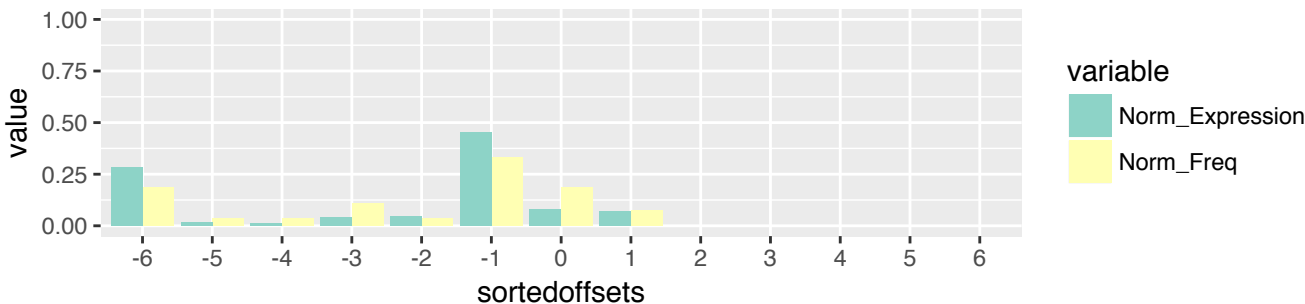

SKCM (n=2038)  
i-tRF & exclusive (n=510)  
5' terminus relative to 5' stem of T-loop (n=27)

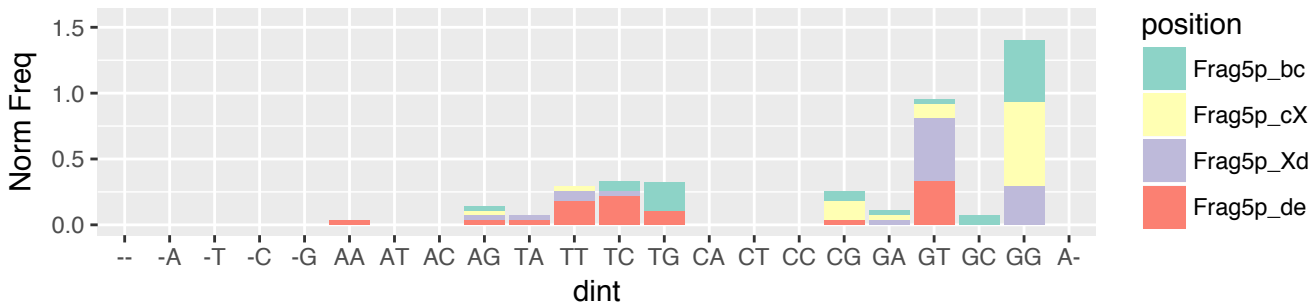

SKCM (n=2038)  
i-tRF & exclusive (n=510)  
5' terminus relative to 5' stem of T-loop (n=27)

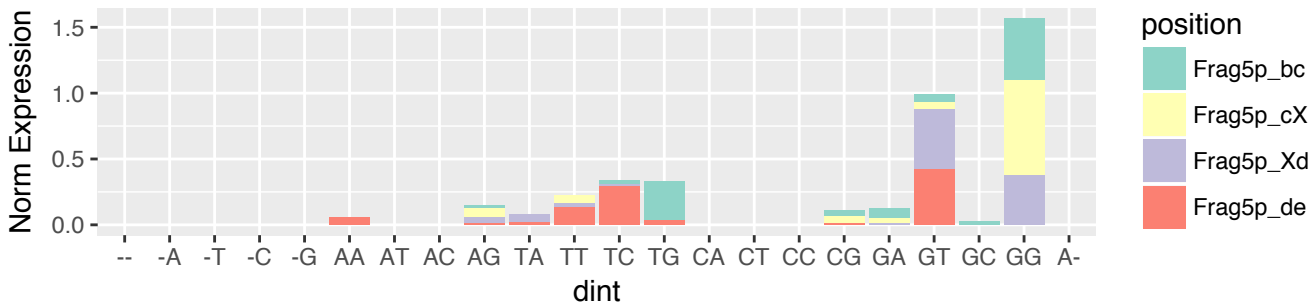

SKCM (n=2038)  
i-tRF & exclusive (n=510)  
3' terminus relative to 3' stem of D-loop (n=11)

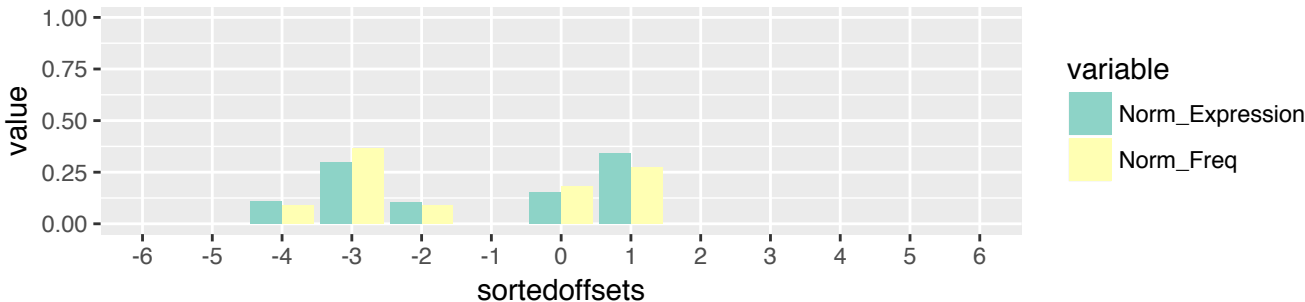

SKCM (n=2038)  
i-tRF & exclusive (n=510)  
3' terminus relative to 3' stem of D-loop (n=11)

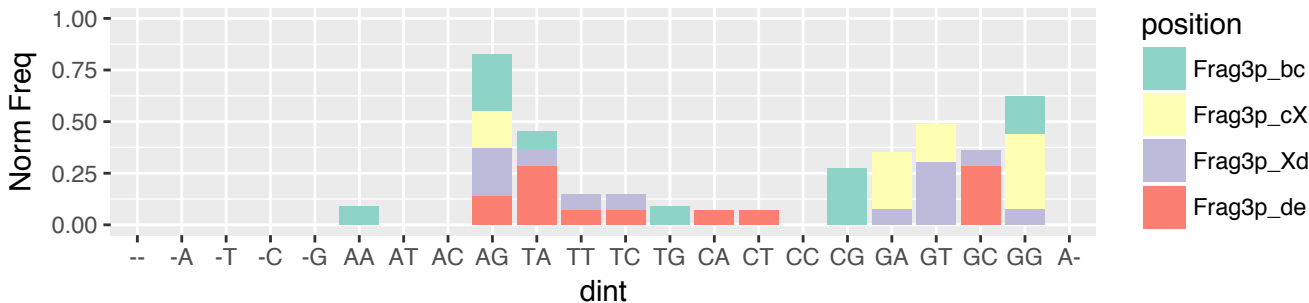

SKCM (n=2038)  
i-tRF & exclusive (n=510)  
3' terminus relative to 3' stem of D-loop (n=11)

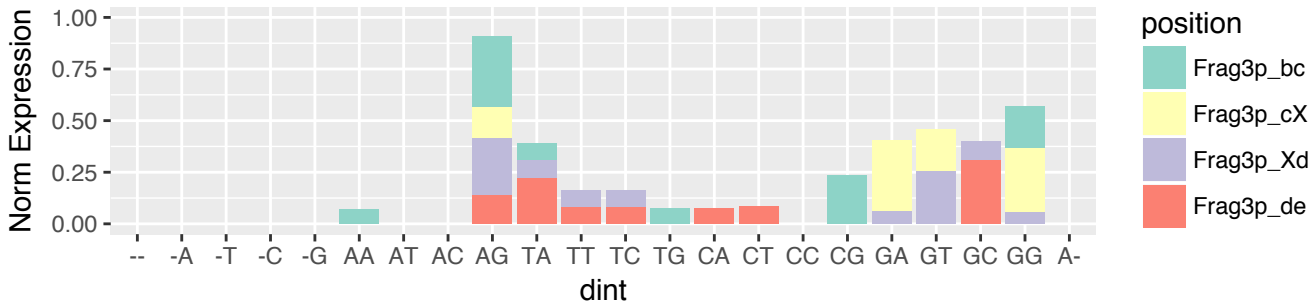

SKCM (n=2038)  
 i-tRF & exclusive (n=510)  
 3' terminus relative to 5' stem of A-loop (n=116)

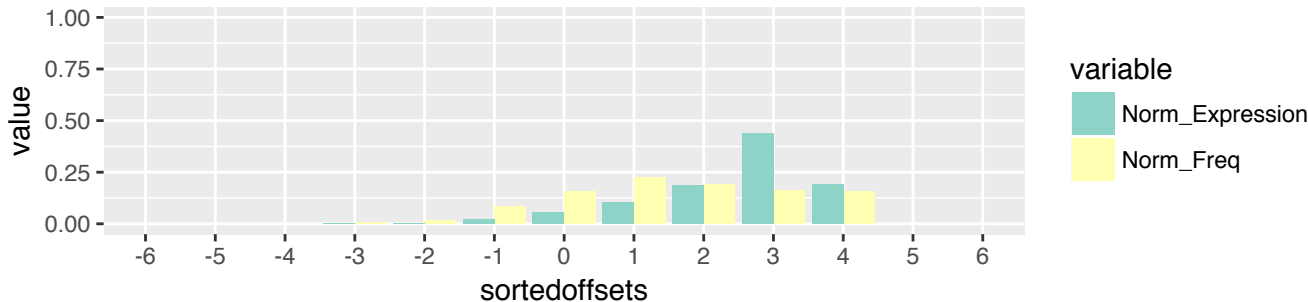

SKCM (n=2038)  
 i-tRF & exclusive (n=510)  
 3' terminus relative to 5' stem of A-loop (n=116)

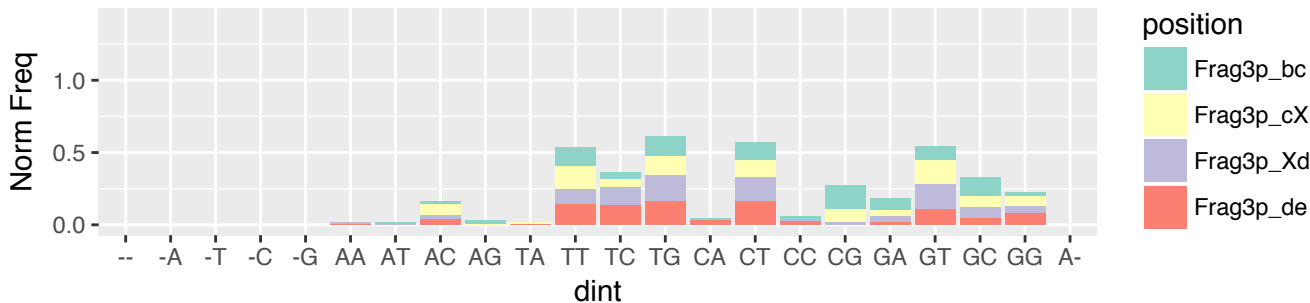

SKCM (n=2038)  
 i-tRF & exclusive (n=510)  
 3' terminus relative to 5' stem of A-loop (n=116)

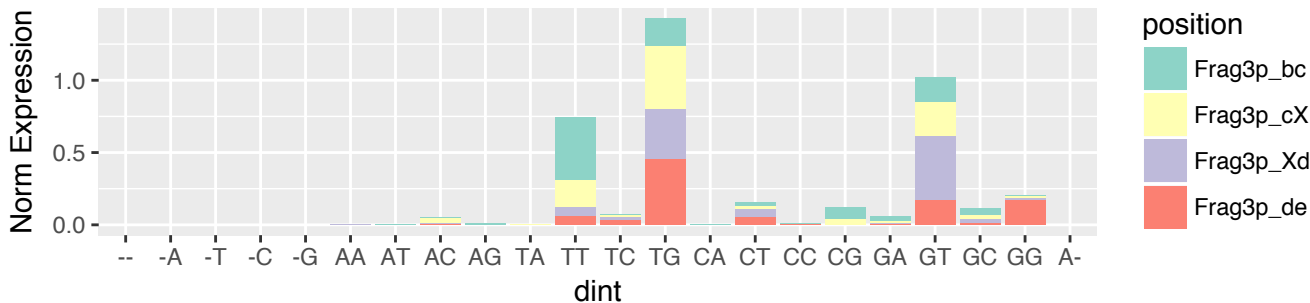

SKCM (n=2038)  
i-tRF & exclusive (n=510)  
3' terminus relative to 3' stem of A-loop (n=132)

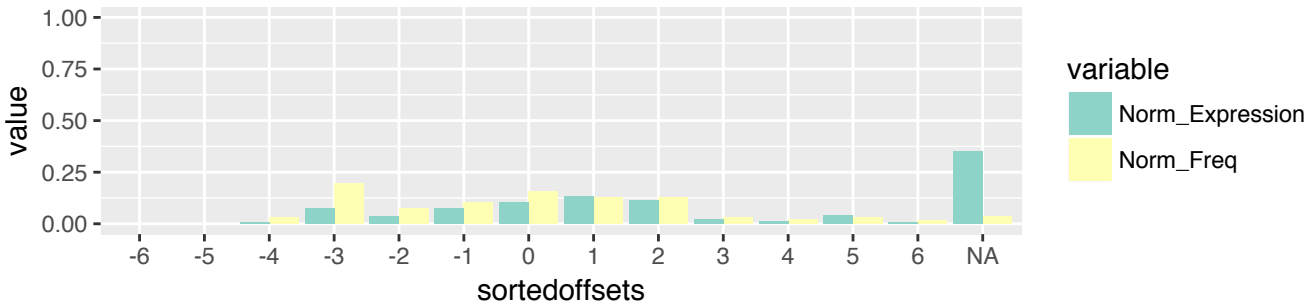

SKCM (n=2038)  
i-tRF & exclusive (n=510)  
3' terminus relative to 3' stem of A-loop (n=132)

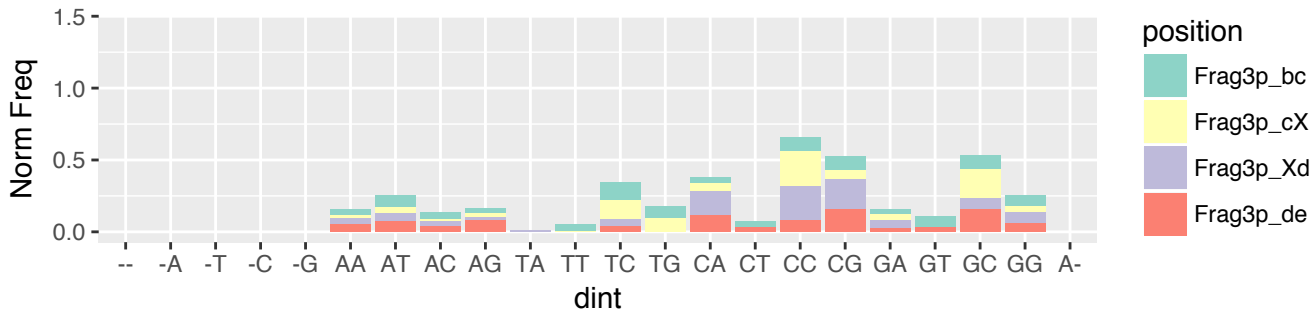

SKCM (n=2038)  
i-tRF & exclusive (n=510)  
3' terminus relative to 3' stem of A-loop (n=132)

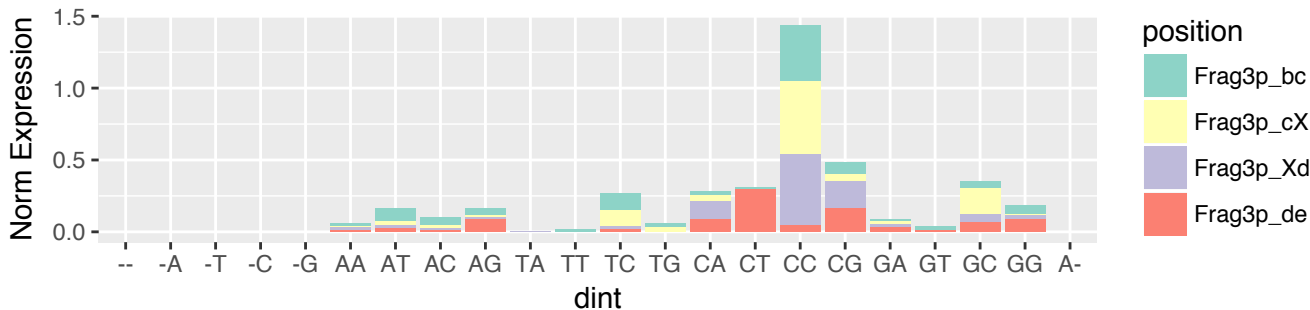

SKCM (n=2038)  
i-tRF & exclusive (n=510)  
3' terminus relative to 5' stem of T-loop (n=165)

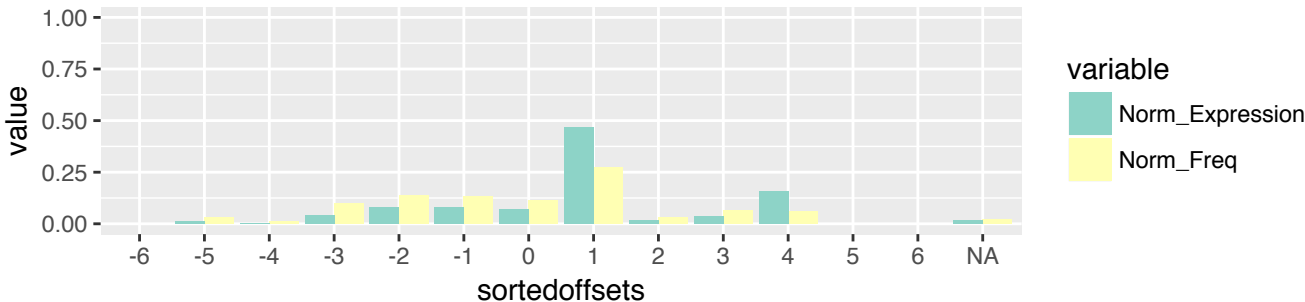

SKCM (n=2038)  
i-tRF & exclusive (n=510)  
3' terminus relative to 5' stem of T-loop (n=165)

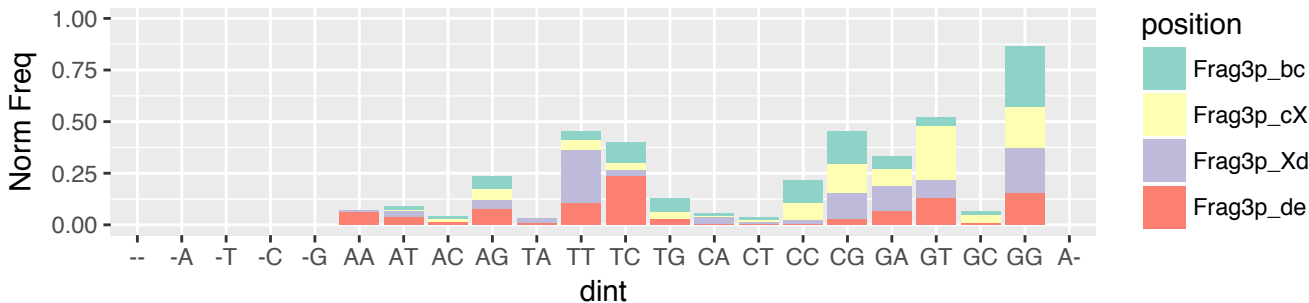

SKCM (n=2038)  
i-tRF & exclusive (n=510)  
3' terminus relative to 5' stem of T-loop (n=165)

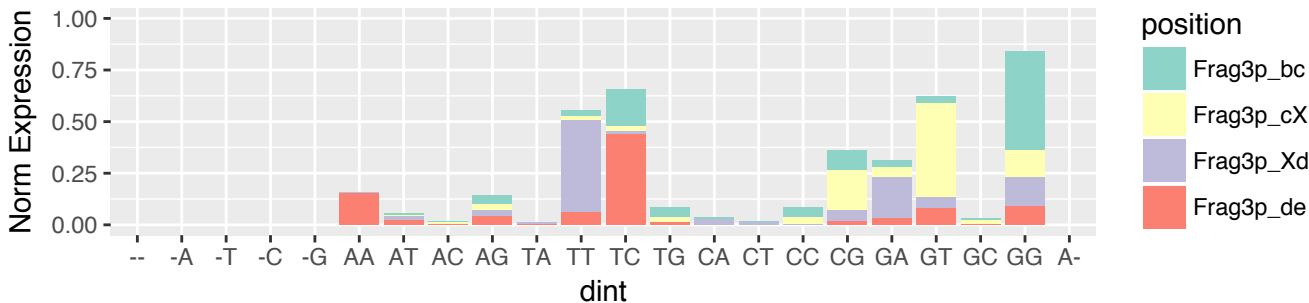

SKCM (n=2038)  
i-tRF & exclusive (n=510)  
3' terminus relative to 3' stem of T-loop (n=61)

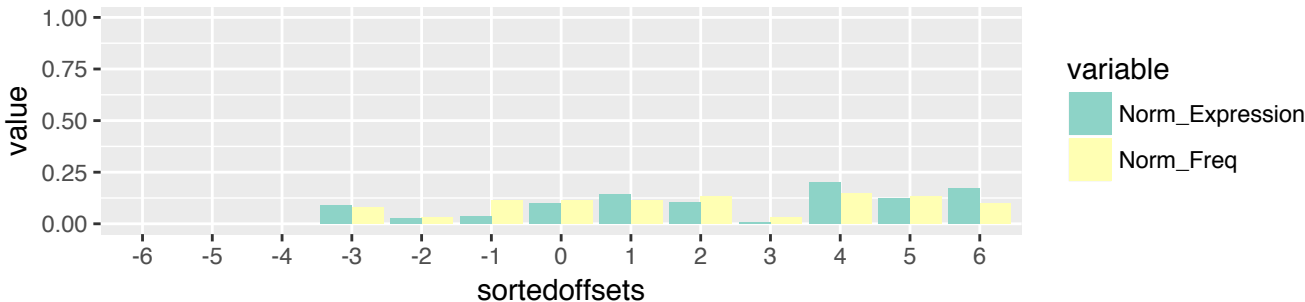

SKCM (n=2038)  
i-tRF & exclusive (n=510)  
3' terminus relative to 3' stem of T-loop (n=61)

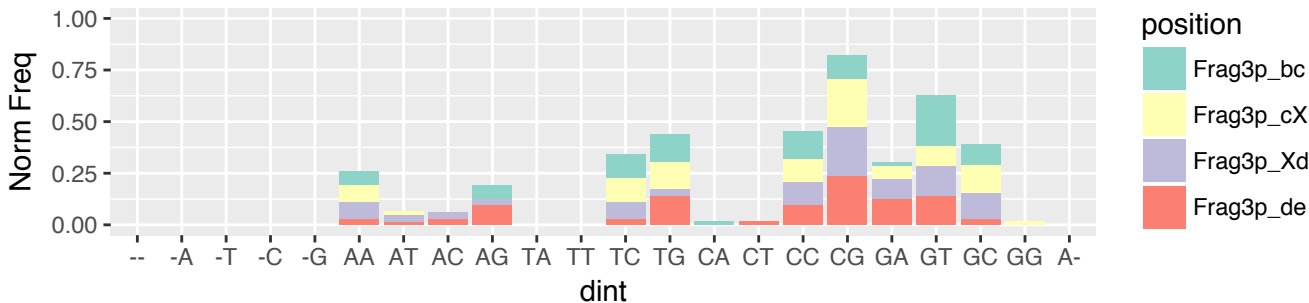

SKCM (n=2038)  
i-tRF & exclusive (n=510)  
3' terminus relative to 3' stem of T-loop (n=61)

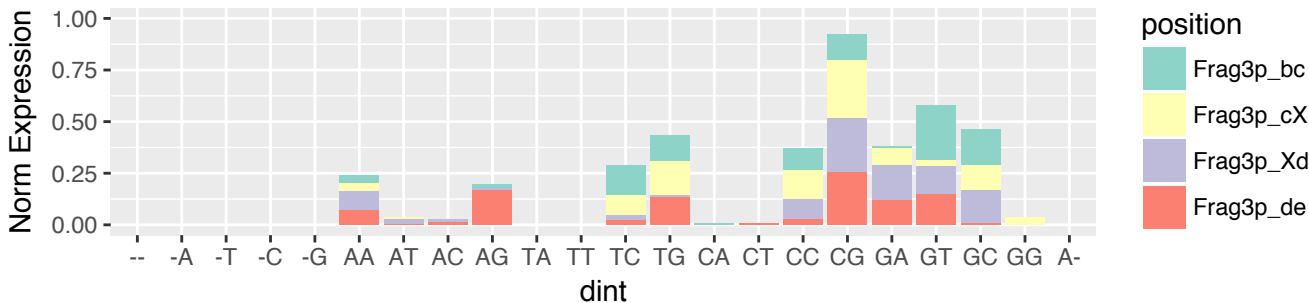

SKCM (n=2038)  
 i-tRF & exclusive (n=510)  
 3' terminus relative to 3' end of the tRNA (n=33)

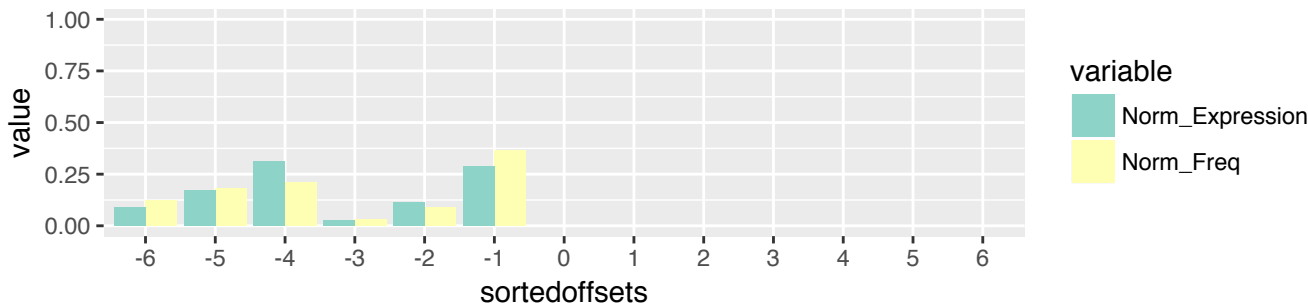

SKCM (n=2038)  
 i-tRF & exclusive (n=510)  
 3' terminus relative to 3' end of the tRNA (n=33)

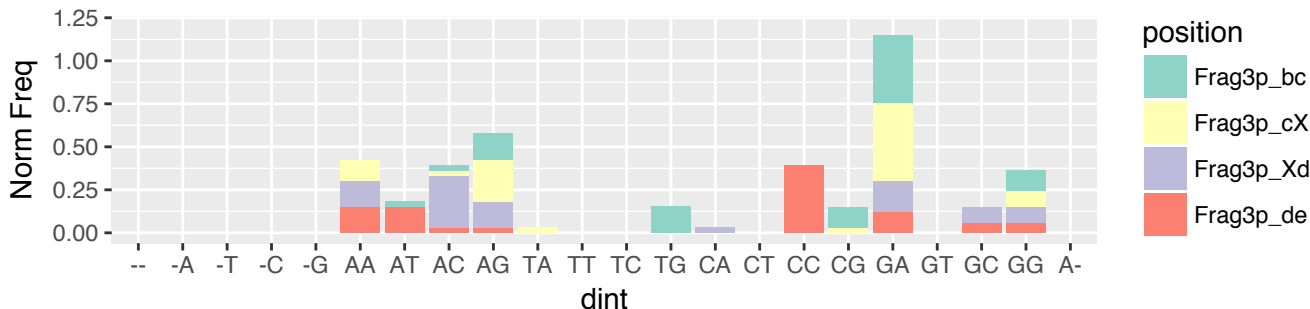

SKCM (n=2038)  
 i-tRF & exclusive (n=510)  
 3' terminus relative to 3' end of the tRNA (n=33)

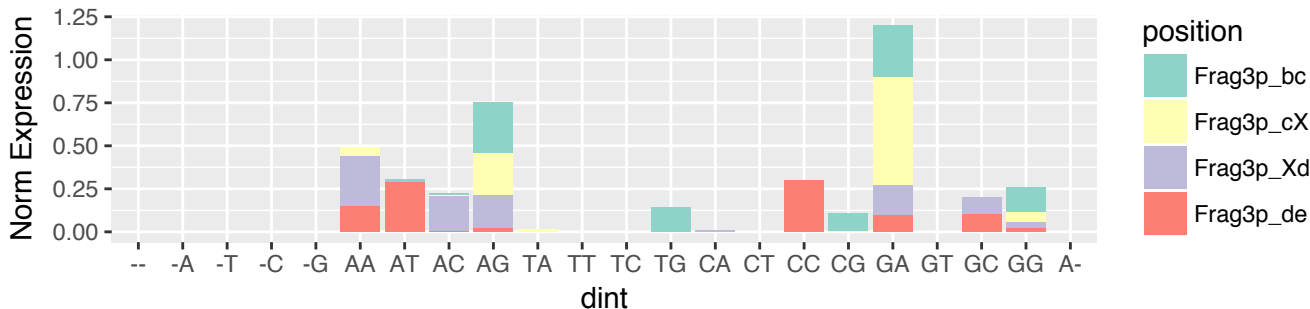

SKCM (n=2038)  
 3'-tRF & exclusive (n=415)  
 5' terminus relative to 3' stem of A-loop (n=2)

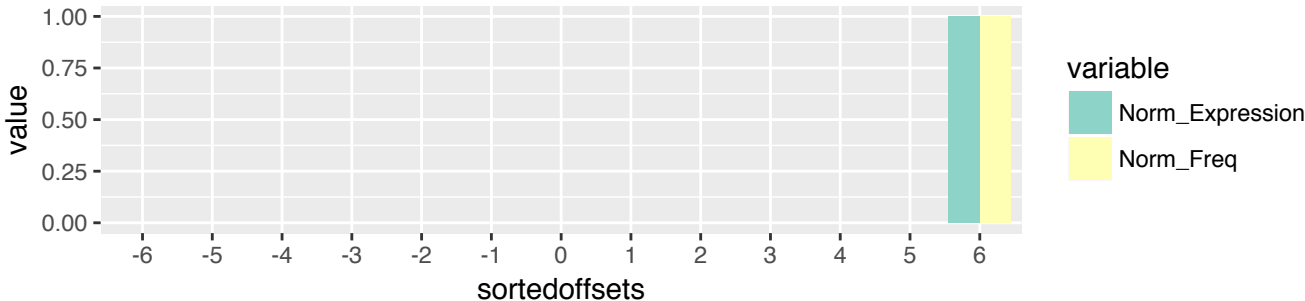

SKCM (n=2038)  
 3'-tRF & exclusive (n=415)  
 5' terminus relative to 3' stem of A-loop (n=2)

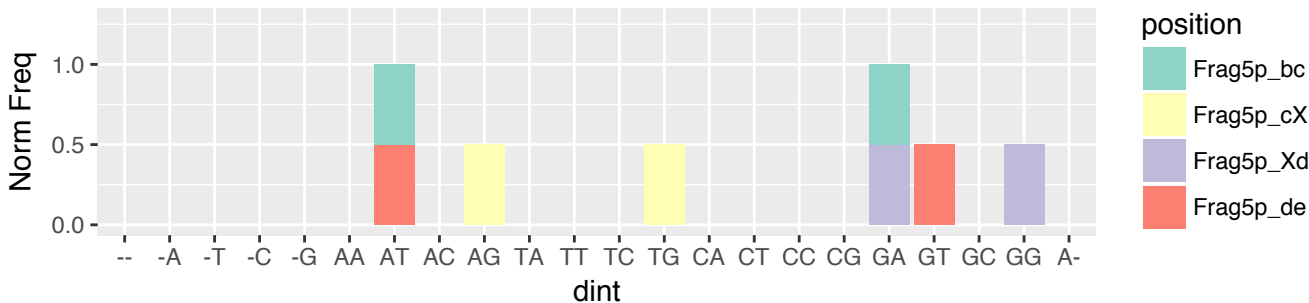

SKCM (n=2038)  
 3'-tRF & exclusive (n=415)  
 5' terminus relative to 3' stem of A-loop (n=2)

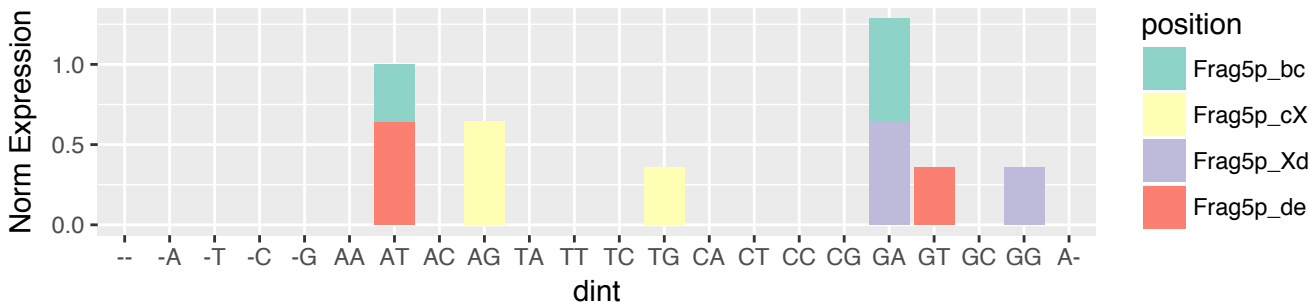



SKCM (n=2038)  
 3'-tRF & exclusive (n=415)  
 5' terminus relative to 5' stem of T-loop (n=286)

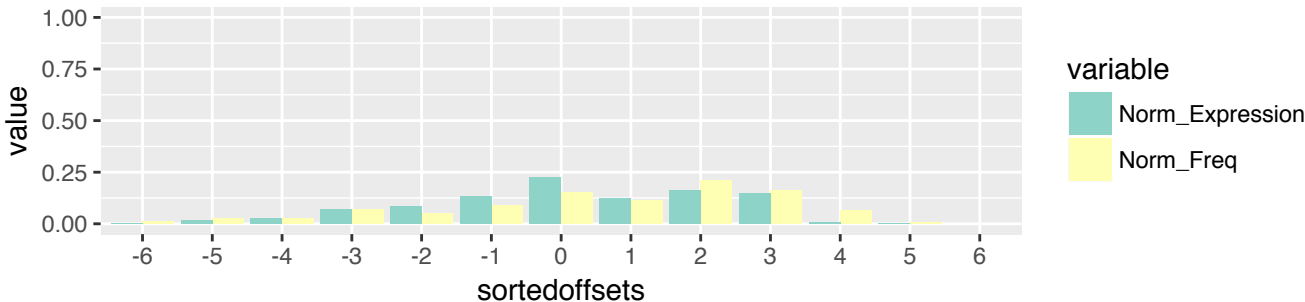

SKCM (n=2038)  
 3'-tRF & exclusive (n=415)  
 5' terminus relative to 5' stem of T-loop (n=286)

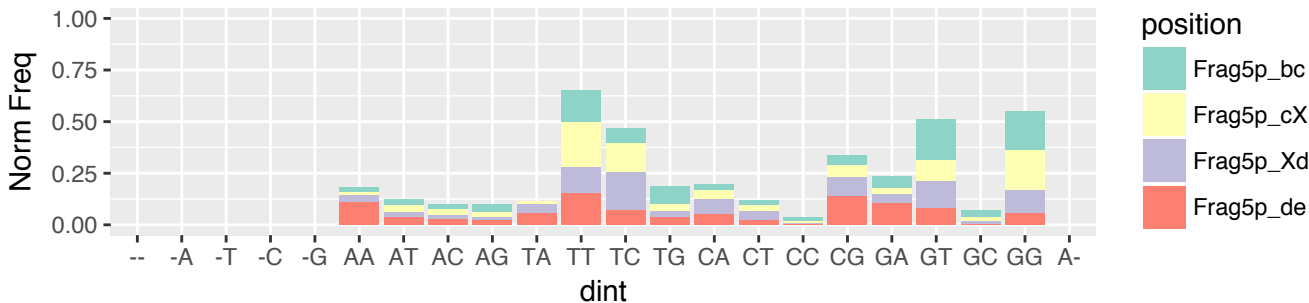

SKCM (n=2038)  
 3'-tRF & exclusive (n=415)  
 5' terminus relative to 5' stem of T-loop (n=286)

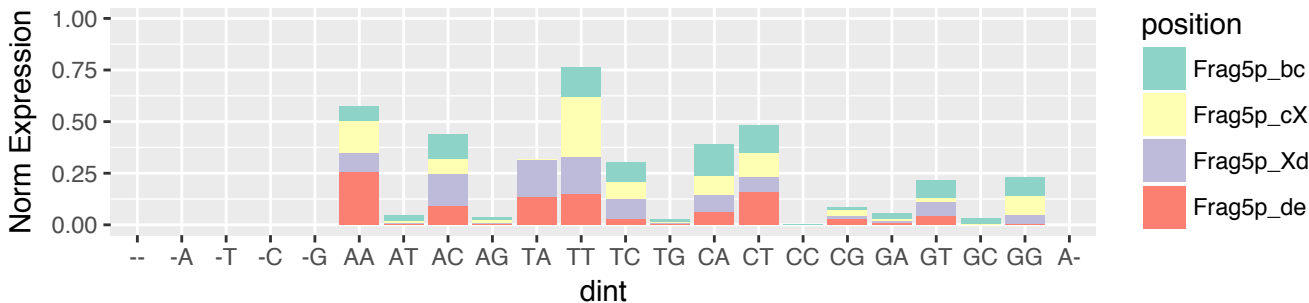

SKCM (n=2038)  
 3'-tRF & exclusive (n=415)  
 5' terminus relative to 3' stem of T-loop (n=130)

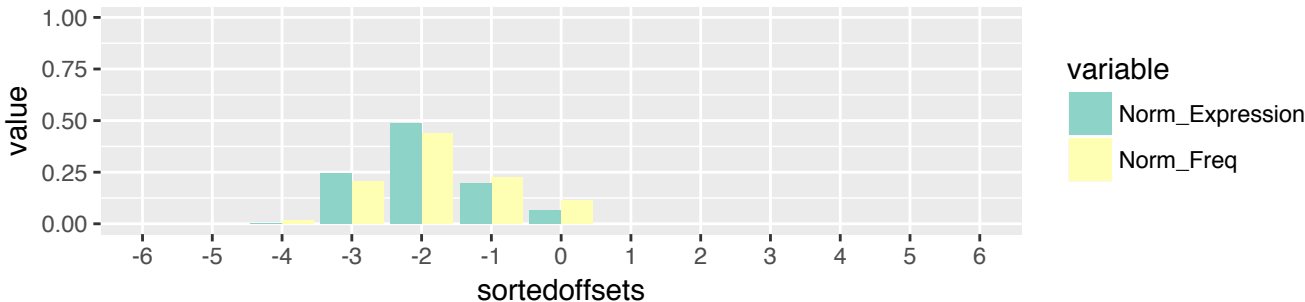

SKCM (n=2038)  
 3'-tRF & exclusive (n=415)  
 5' terminus relative to 3' stem of T-loop (n=130)

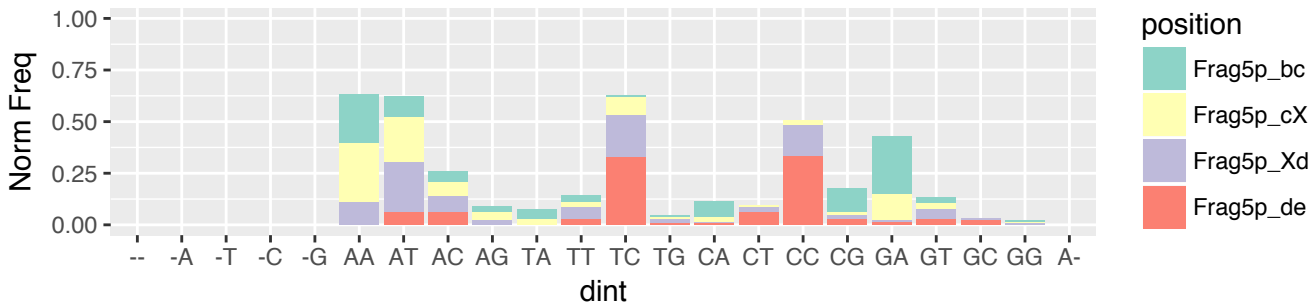

SKCM (n=2038)  
 3'-tRF & exclusive (n=415)  
 5' terminus relative to 3' stem of T-loop (n=130)

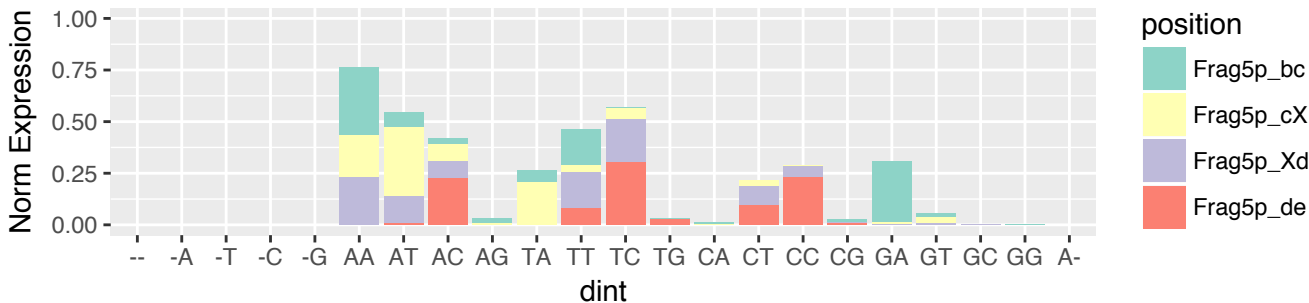

SKCM (n=2038)  
 3'-tRF & exclusive (n=415)  
 3' terminus relative to 3' end of the tRNA (n=415)

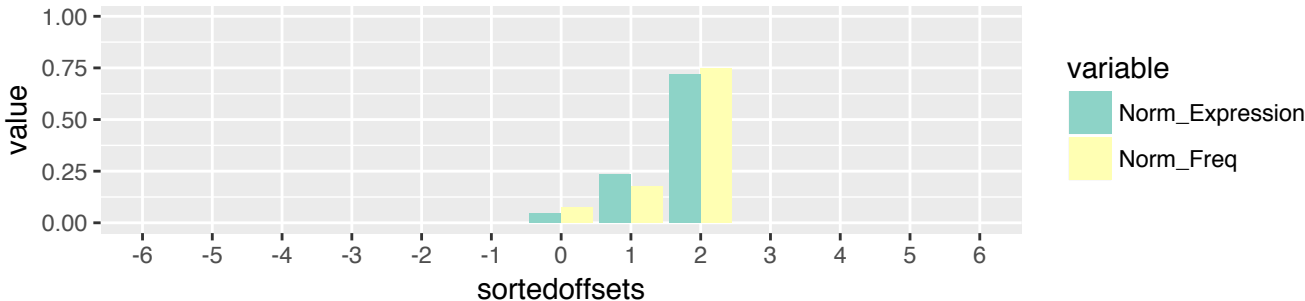

SKCM (n=2038)  
 3'-tRF & exclusive (n=415)  
 3' terminus relative to 3' end of the tRNA (n=415)

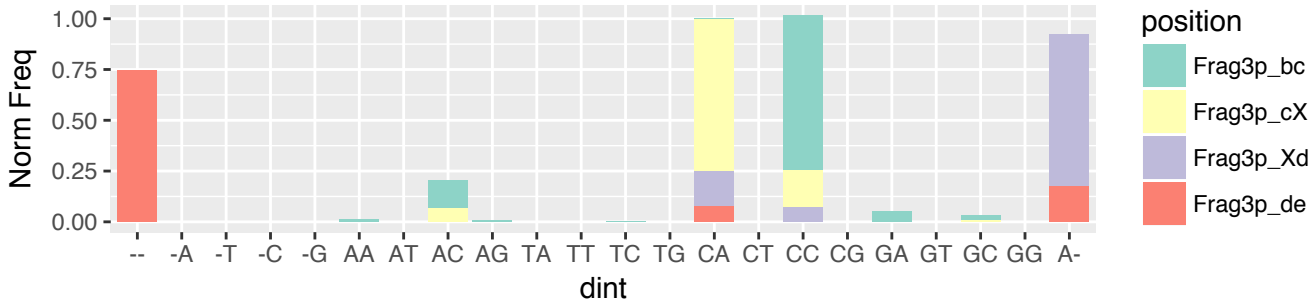

SKCM (n=2038)  
 3'-tRF & exclusive (n=415)  
 3' terminus relative to 3' end of the tRNA (n=415)

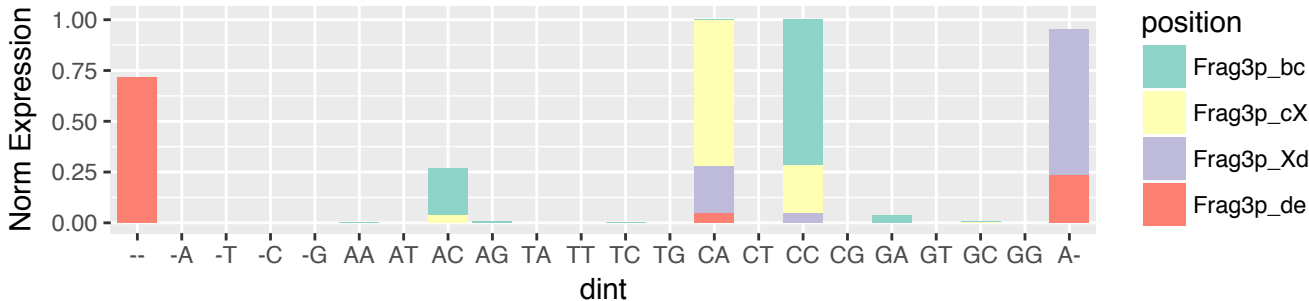

STAD (n=752)  
5'-half & exclusive (n=4)  
5' terminus relative to 5' end of the tRNA (n=4)



STAD (n=752)  
5'-half & exclusive (n=4)  
5' terminus relative to 5' end of the tRNA (n=4)

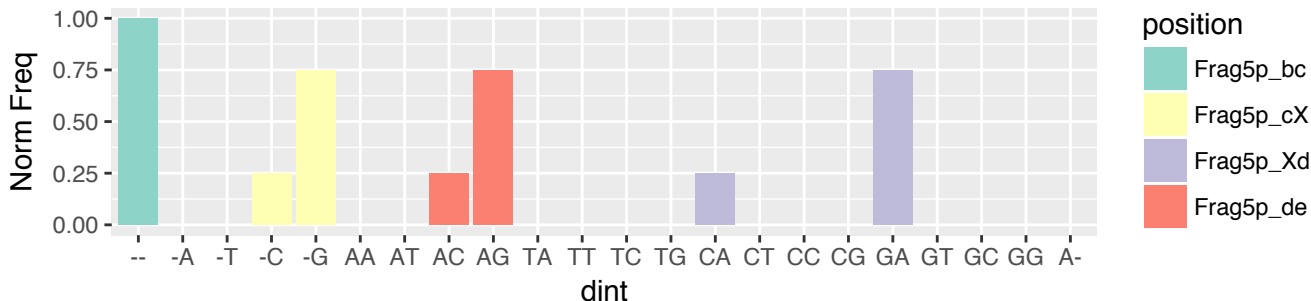

STAD (n=752)  
5'-half & exclusive (n=4)  
5' terminus relative to 5' end of the tRNA (n=4)

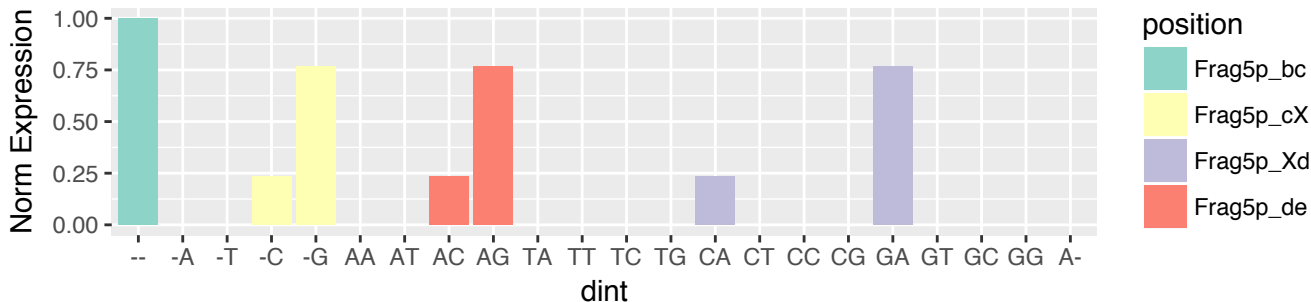

STAD (n=752)  
 5'-half & exclusive (n=4)  
 3' terminus relative to 5' stem of A-loop (n=4)

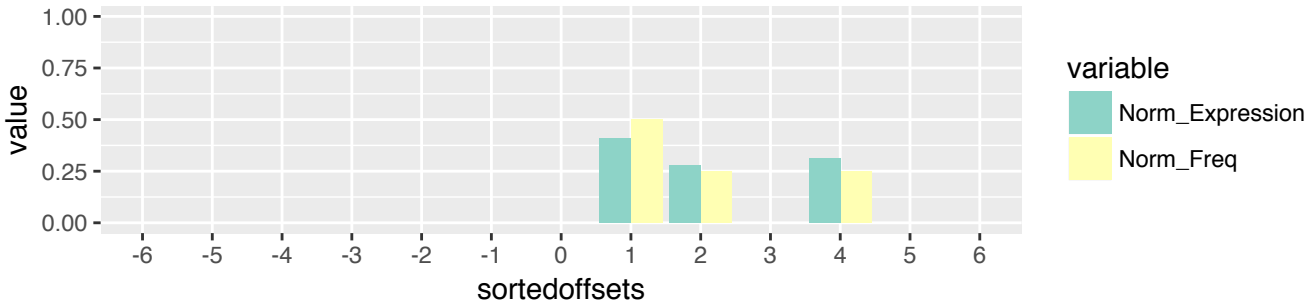

STAD (n=752)  
 5'-half & exclusive (n=4)  
 3' terminus relative to 5' stem of A-loop (n=4)

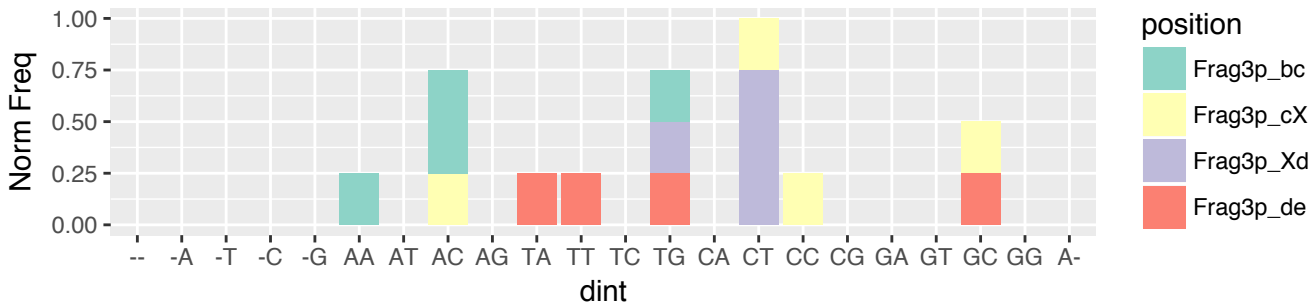

STAD (n=752)  
 5'-half & exclusive (n=4)  
 3' terminus relative to 5' stem of A-loop (n=4)

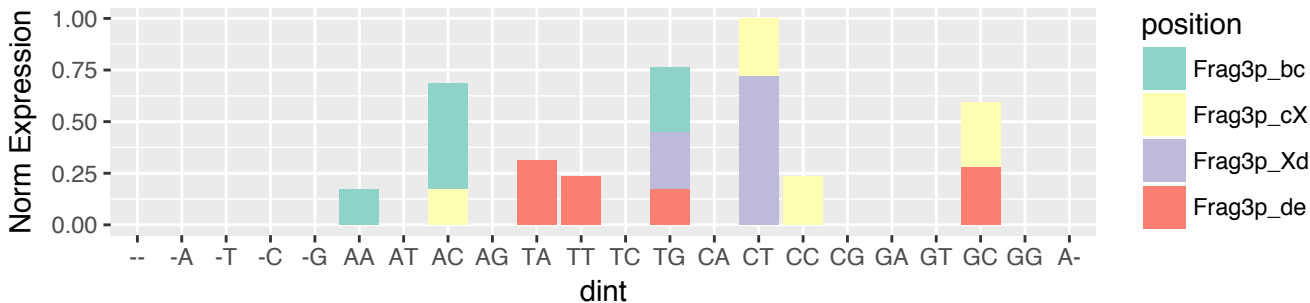

STAD (n=752)  
 5'-tRF & exclusive (n=136)  
 5' terminus relative to 5' end of the tRNA (n=136)

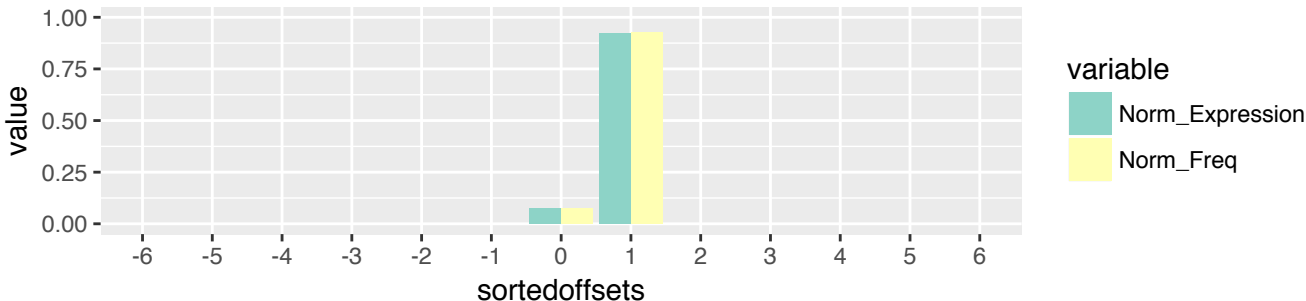

STAD (n=752)  
 5'-tRF & exclusive (n=136)  
 5' terminus relative to 5' end of the tRNA (n=136)

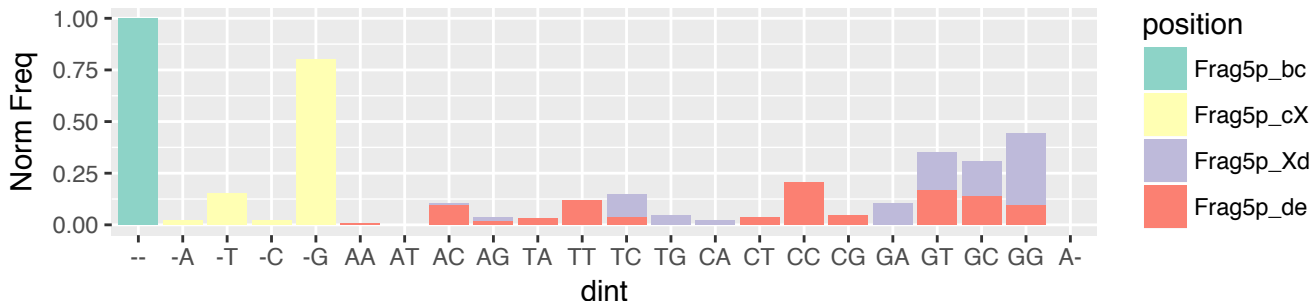

STAD (n=752)  
 5'-tRF & exclusive (n=136)  
 5' terminus relative to 5' end of the tRNA (n=136)

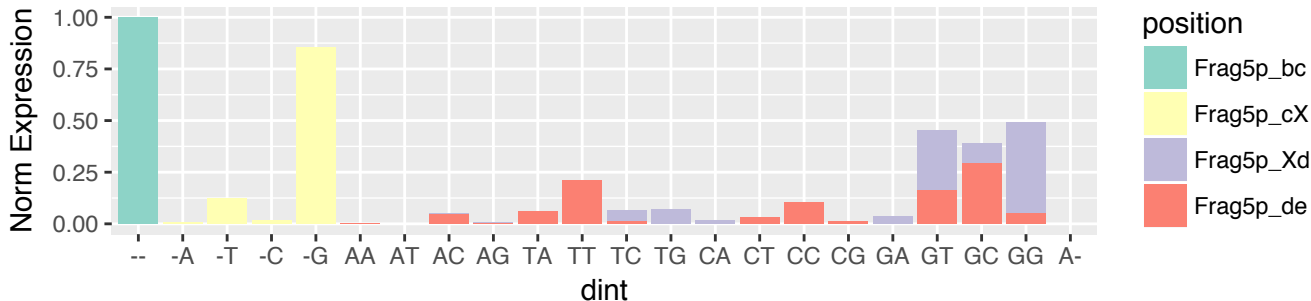

STAD (n=752)  
 5'-tRF & exclusive (n=136)  
 3' terminus relative to 5' stem of D-loop (n=7)

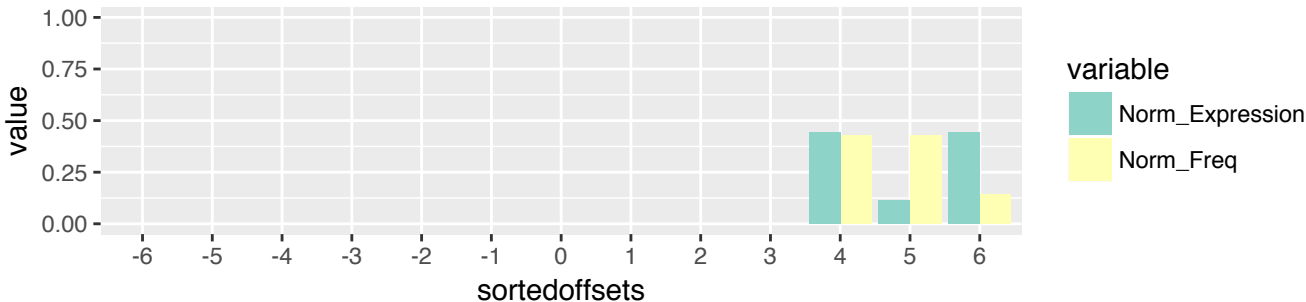

STAD (n=752)  
 5'-tRF & exclusive (n=136)  
 3' terminus relative to 5' stem of D-loop (n=7)

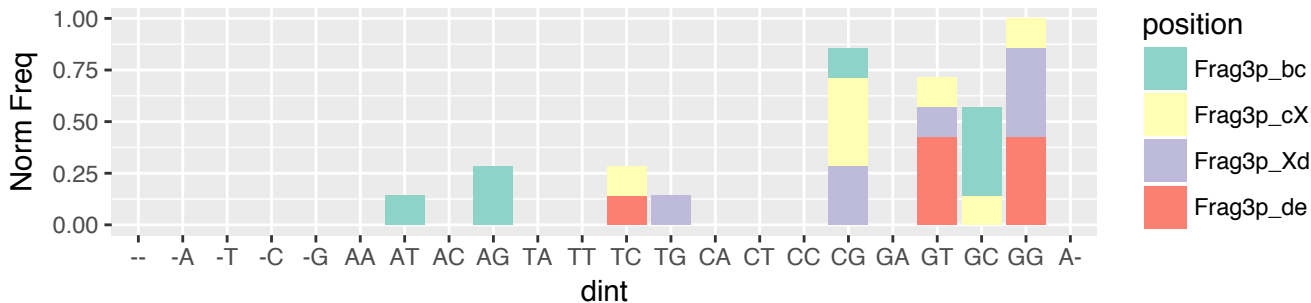

STAD (n=752)  
 5'-tRF & exclusive (n=136)  
 3' terminus relative to 5' stem of D-loop (n=7)

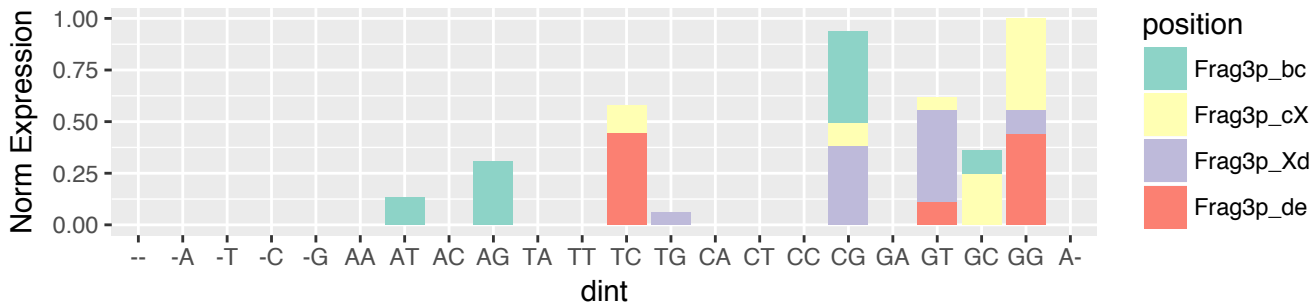

STAD (n=752)  
 5'-tRF & exclusive (n=136)  
 3' terminus relative to 3' stem of D-loop (n=120)

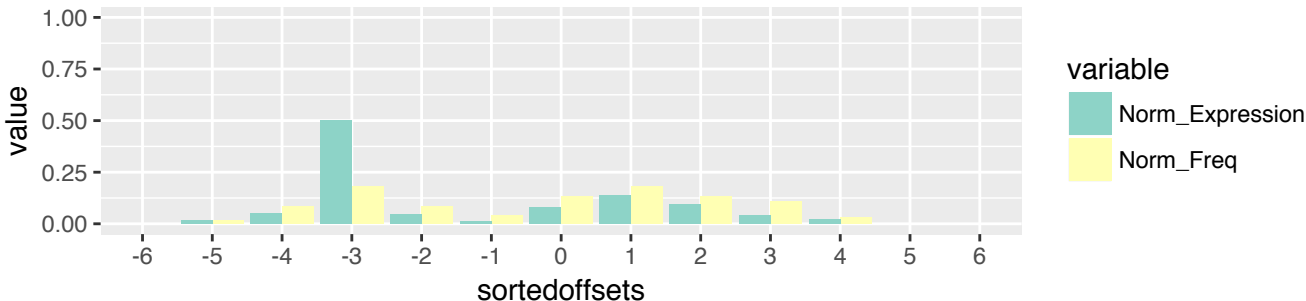

STAD (n=752)  
 5'-tRF & exclusive (n=136)  
 3' terminus relative to 3' stem of D-loop (n=120)

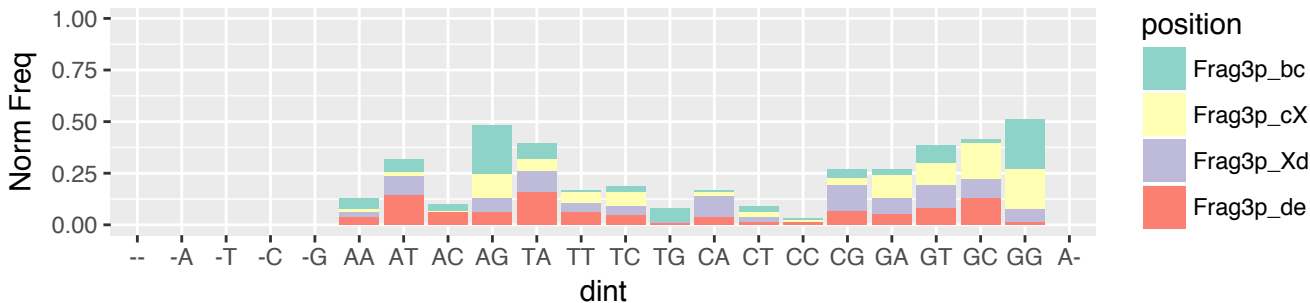

STAD (n=752)  
 5'-tRF & exclusive (n=136)  
 3' terminus relative to 3' stem of D-loop (n=120)

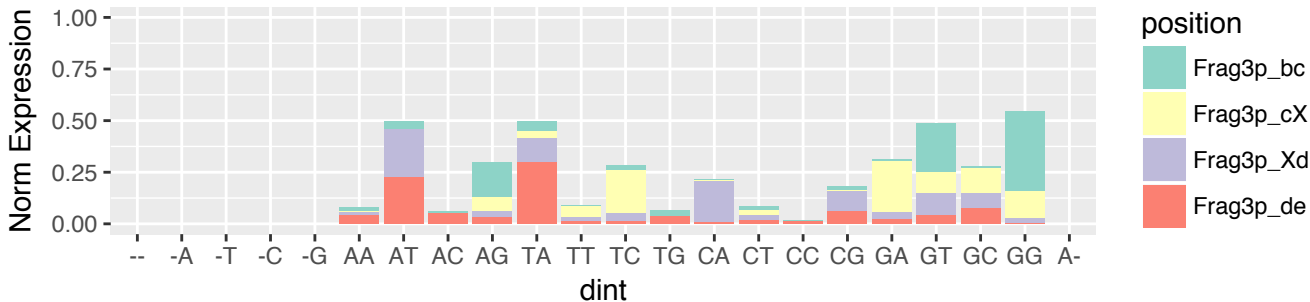



STAD (n=752)  
 5'-tRF & exclusive (n=136)  
 3' terminus relative to 5' stem of A-loop (n=6)

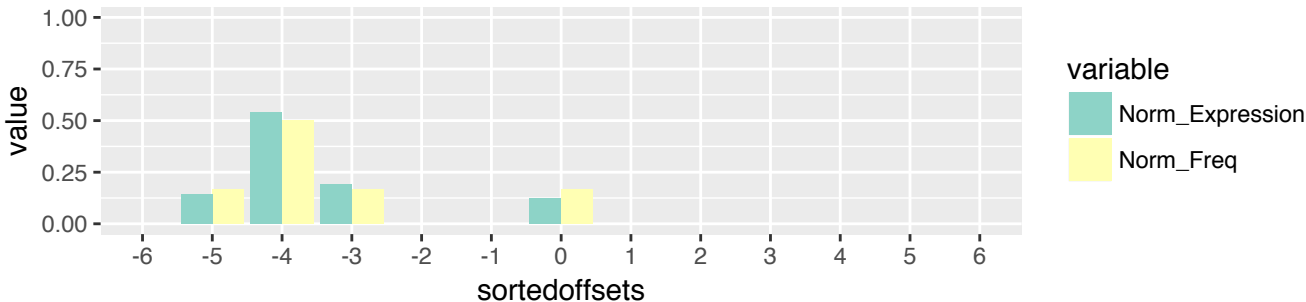

STAD (n=752)  
 5'-tRF & exclusive (n=136)  
 3' terminus relative to 5' stem of A-loop (n=6)

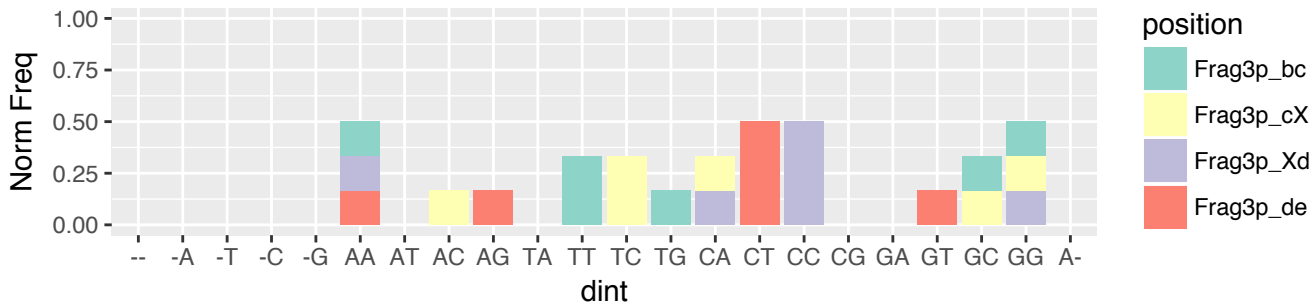

STAD (n=752)  
 5'-tRF & exclusive (n=136)  
 3' terminus relative to 5' stem of A-loop (n=6)

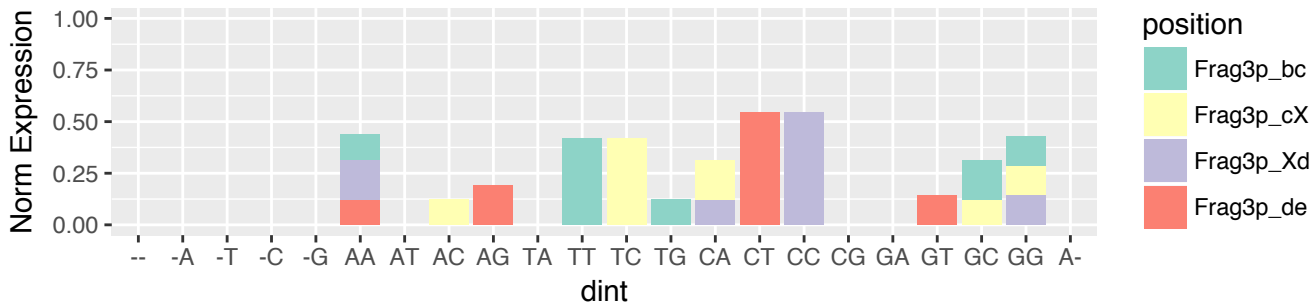

STAD (n=752)  
 5'-tRF & exclusive (n=136)  
 3' terminus relative to 3' stem of A-loop (n=3)

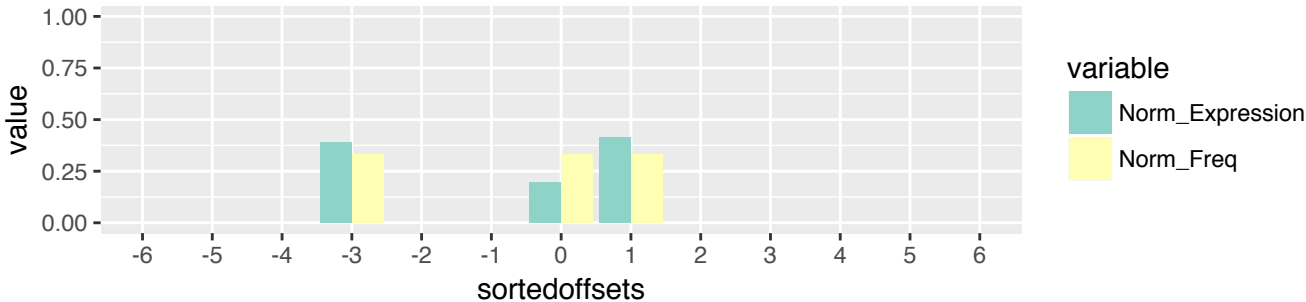

STAD (n=752)  
 5'-tRF & exclusive (n=136)  
 3' terminus relative to 3' stem of A-loop (n=3)



STAD (n=752)  
 5'-tRF & exclusive (n=136)  
 3' terminus relative to 3' stem of A-loop (n=3)

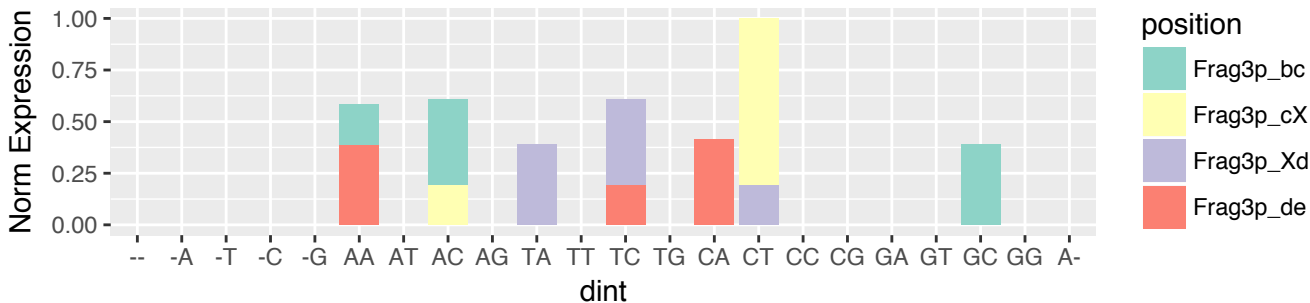

STAD (n=752)  
i-tRF & exclusive (n=133)  
5' terminus relative to 5' stem of D-loop (n=56)

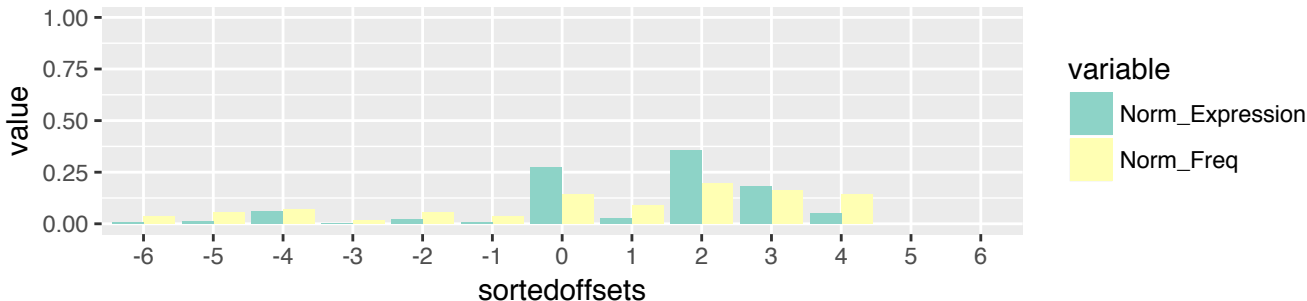

STAD (n=752)  
i-tRF & exclusive (n=133)  
5' terminus relative to 5' stem of D-loop (n=56)

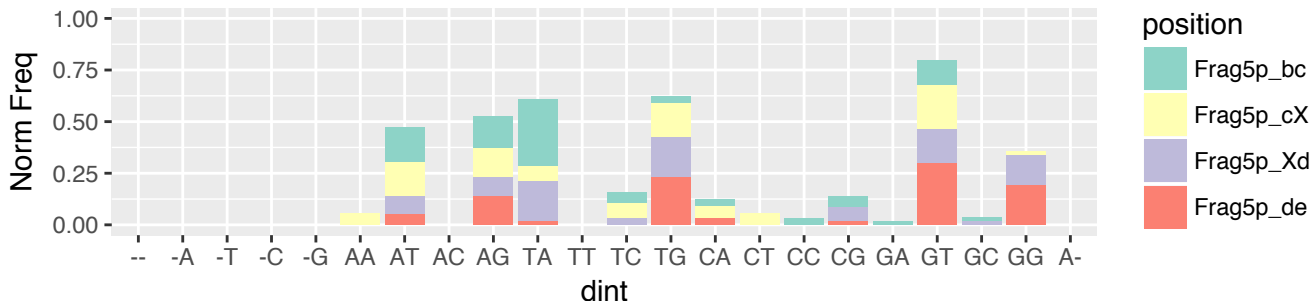

STAD (n=752)  
i-tRF & exclusive (n=133)  
5' terminus relative to 5' stem of D-loop (n=56)

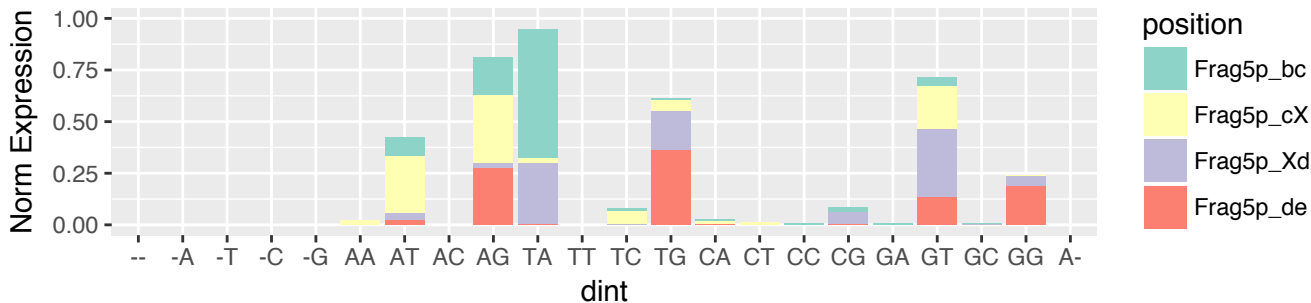

STAD (n=752)  
i-tRF & exclusive (n=133)  
5' terminus relative to 3' stem of D-loop (n=6)

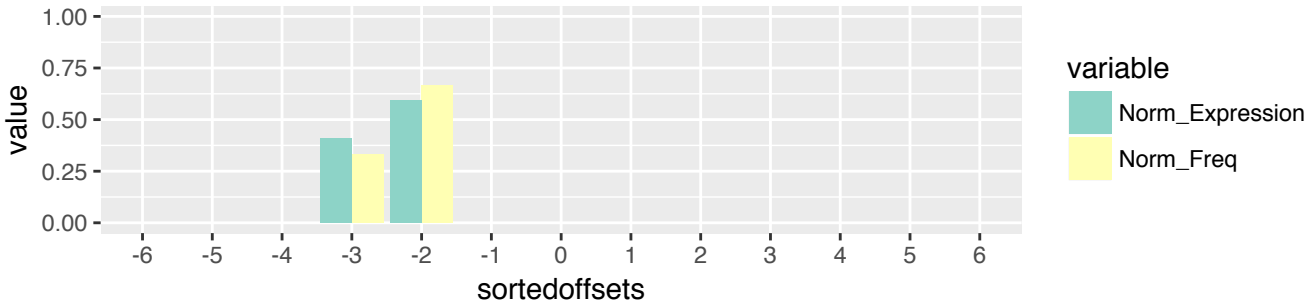

STAD (n=752)  
i-tRF & exclusive (n=133)  
5' terminus relative to 3' stem of D-loop (n=6)

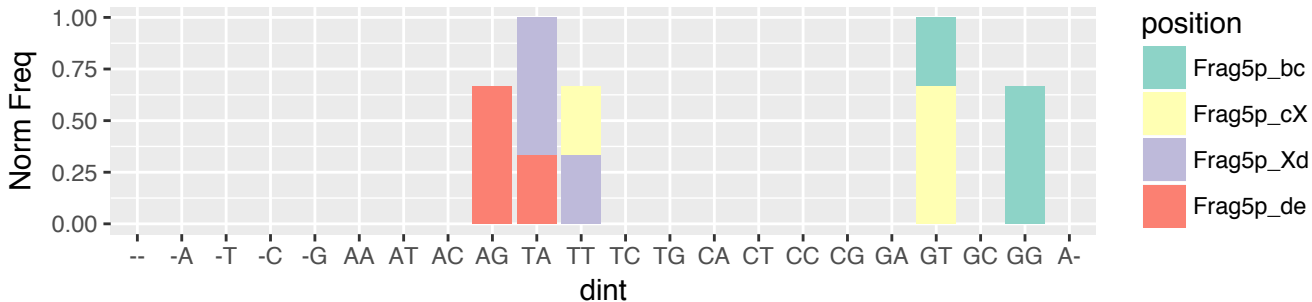

STAD (n=752)  
i-tRF & exclusive (n=133)  
5' terminus relative to 3' stem of D-loop (n=6)

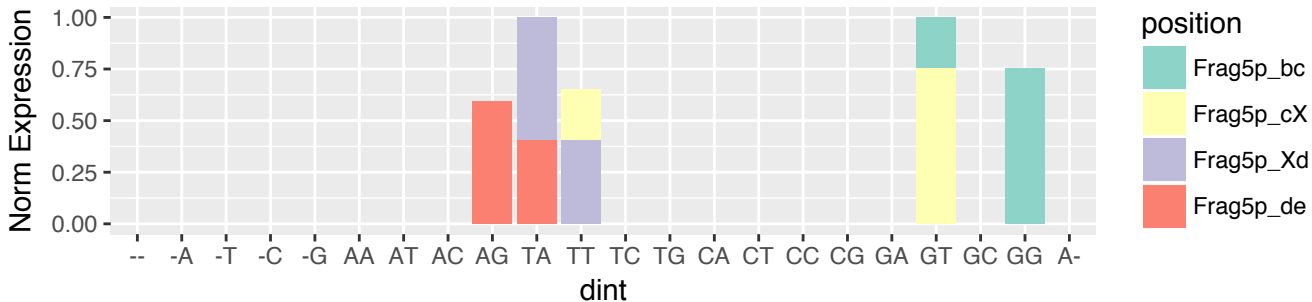

STAD (n=752)  
 i-tRF & exclusive (n=133)  
 5' terminus relative to 5' stem of A-loop (n=27)

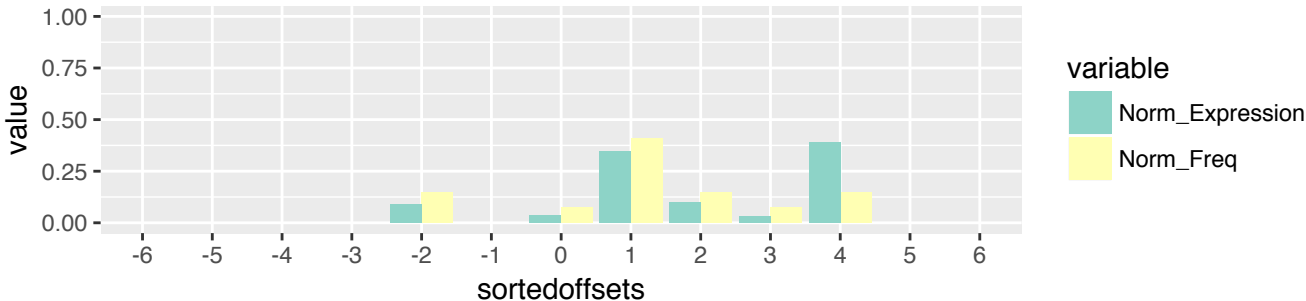

STAD (n=752)  
 i-tRF & exclusive (n=133)  
 5' terminus relative to 5' stem of A-loop (n=27)

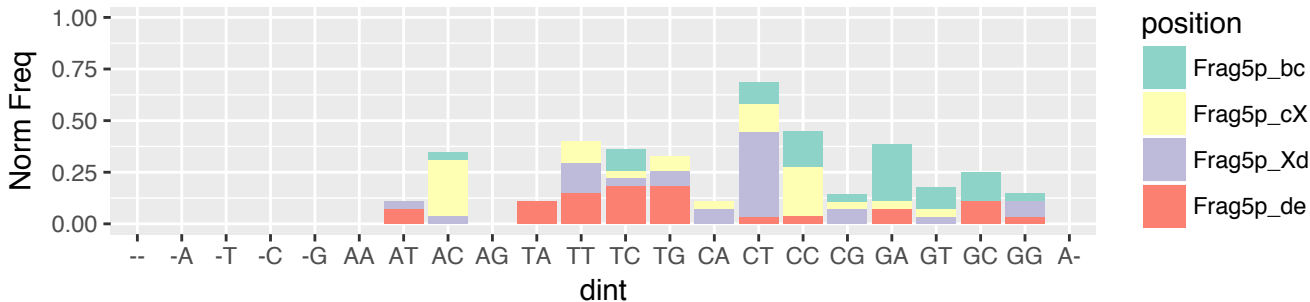

STAD (n=752)  
 i-tRF & exclusive (n=133)  
 5' terminus relative to 5' stem of A-loop (n=27)

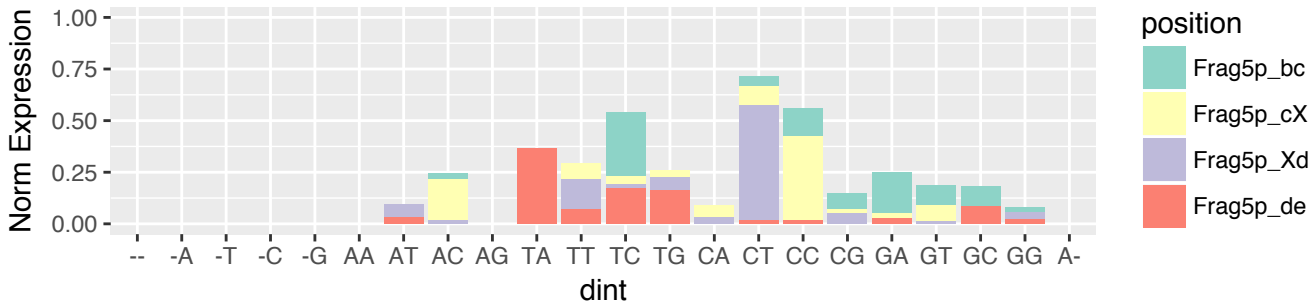

STAD (n=752)  
 i-tRF & exclusive (n=133)  
 5' terminus relative to 3' stem of A-loop (n=35)

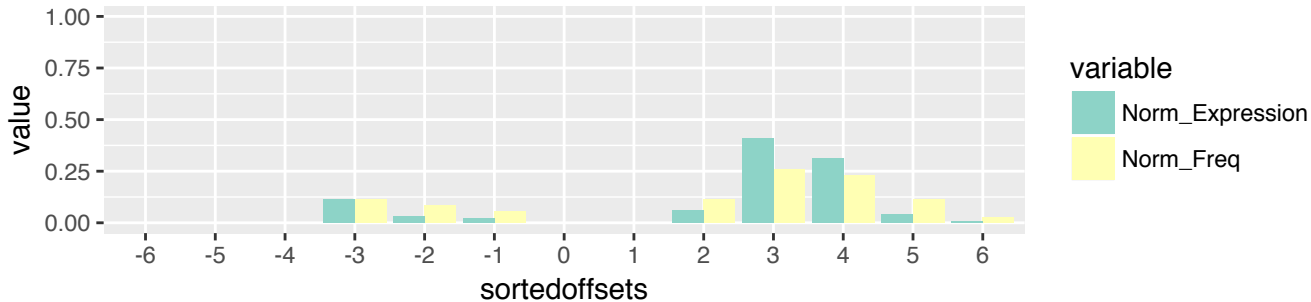

STAD (n=752)  
 i-tRF & exclusive (n=133)  
 5' terminus relative to 3' stem of A-loop (n=35)

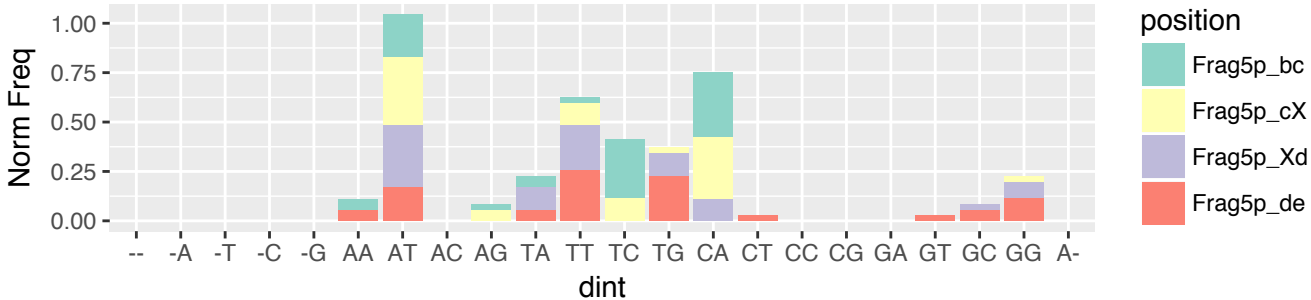

STAD (n=752)  
 i-tRF & exclusive (n=133)  
 5' terminus relative to 3' stem of A-loop (n=35)

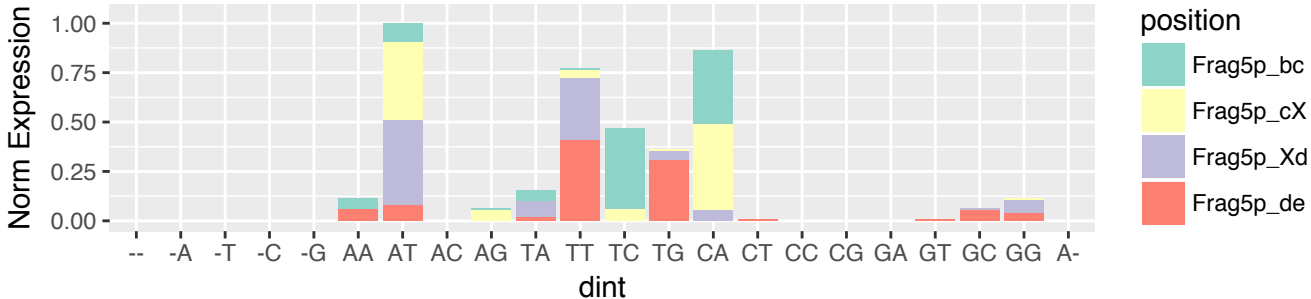

STAD (n=752)  
 i-tRF & exclusive (n=133)  
 5' terminus relative to 5' stem of T-loop (n=9)

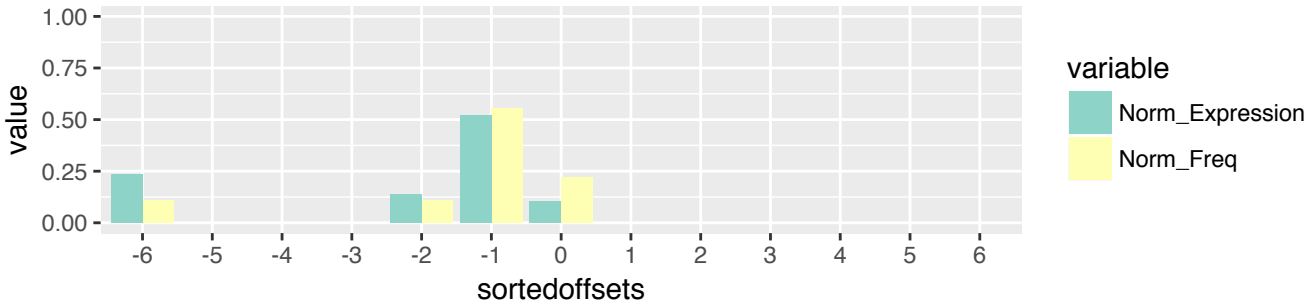

STAD (n=752)  
 i-tRF & exclusive (n=133)  
 5' terminus relative to 5' stem of T-loop (n=9)

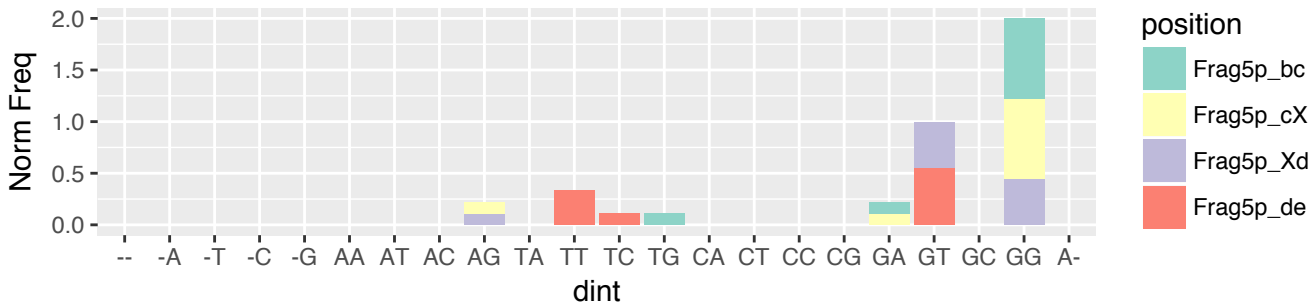

STAD (n=752)  
 i-tRF & exclusive (n=133)  
 5' terminus relative to 5' stem of T-loop (n=9)

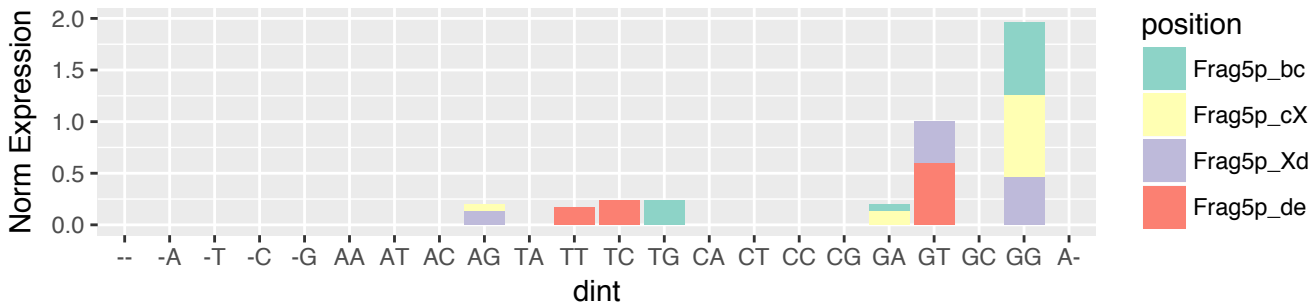

STAD (n=752)  
i-tRF & exclusive (n=133)  
3' terminus relative to 5' stem of A-loop (n=40)

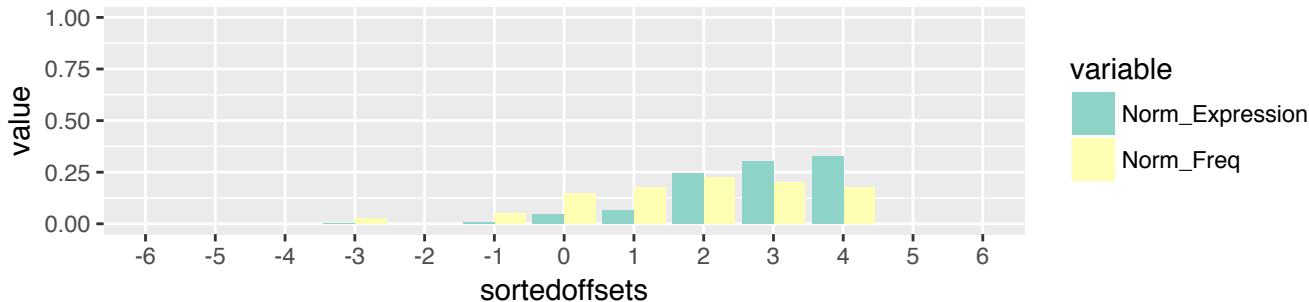

STAD (n=752)  
i-tRF & exclusive (n=133)  
3' terminus relative to 5' stem of A-loop (n=40)

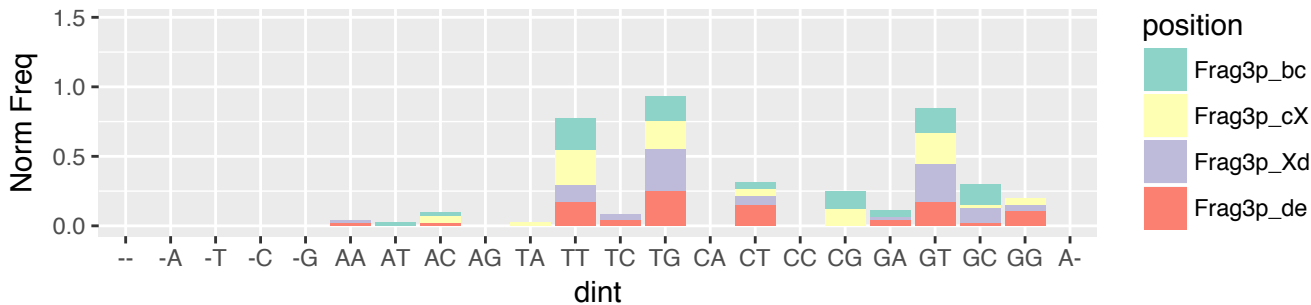

STAD (n=752)  
i-tRF & exclusive (n=133)  
3' terminus relative to 5' stem of A-loop (n=40)

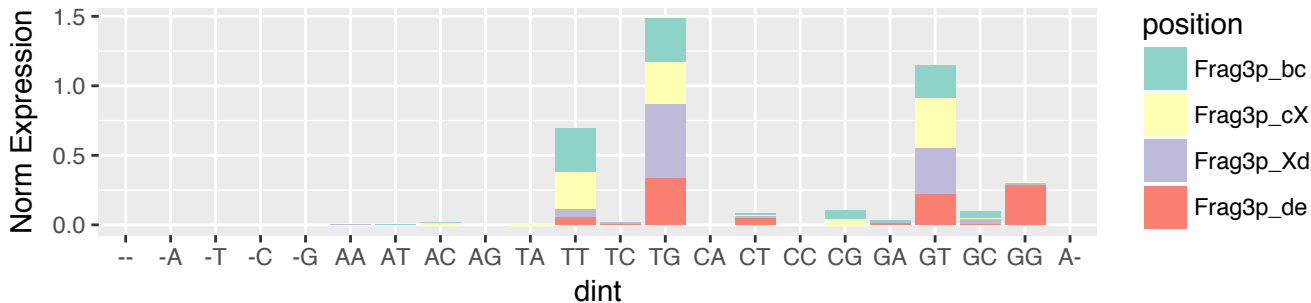



STAD (n=752)  
 i-tRF & exclusive (n=133)  
 3' terminus relative to 3' stem of A-loop (n=25)

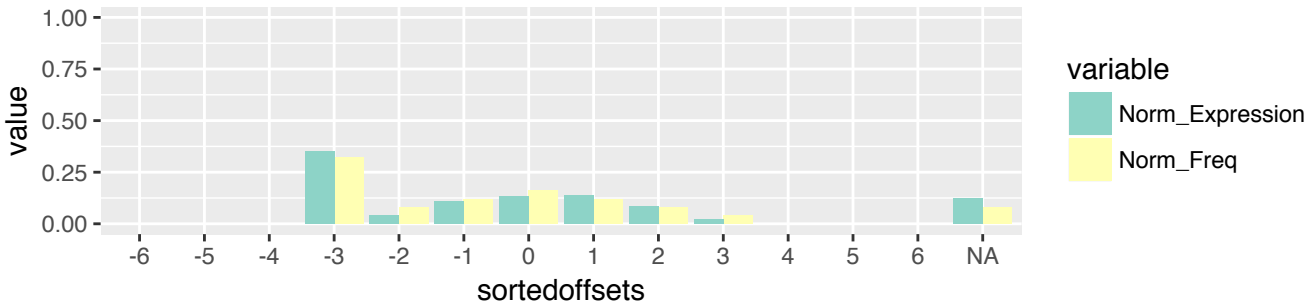

STAD (n=752)  
 i-tRF & exclusive (n=133)  
 3' terminus relative to 3' stem of A-loop (n=25)

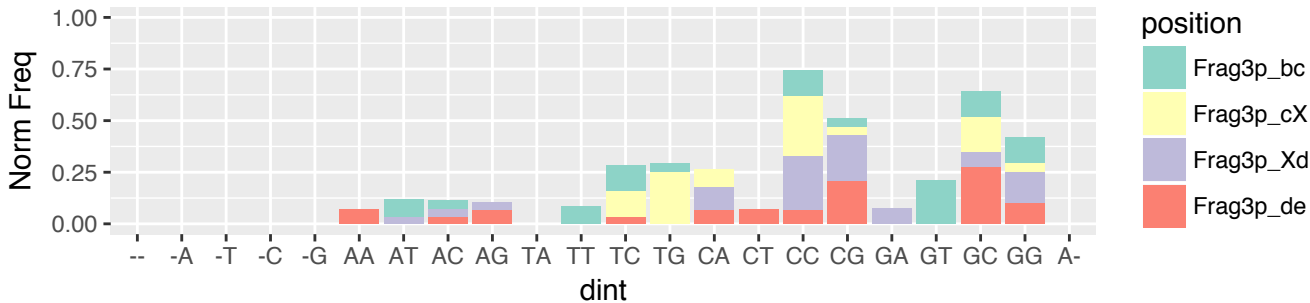

STAD (n=752)  
 i-tRF & exclusive (n=133)  
 3' terminus relative to 3' stem of A-loop (n=25)

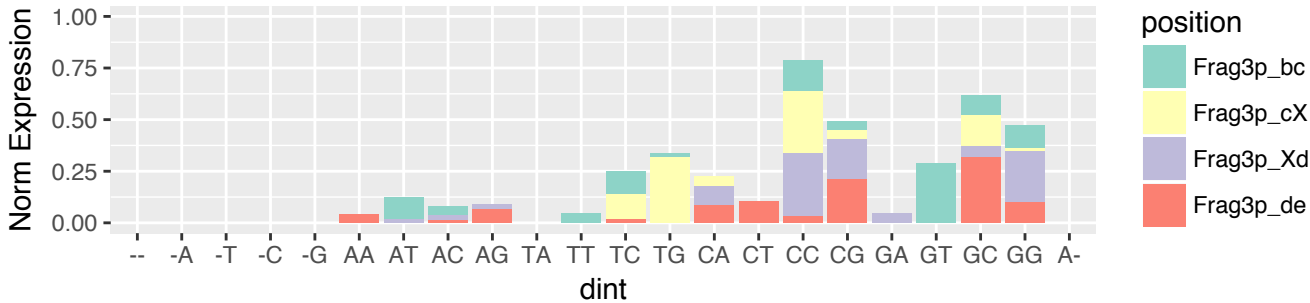

STAD (n=752)  
i-tRF & exclusive (n=133)  
3' terminus relative to 5' stem of T-loop (n=29)

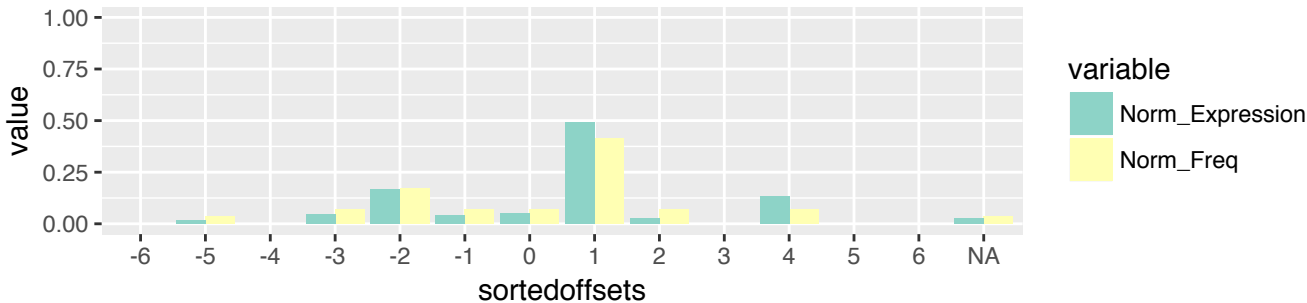

STAD (n=752)  
i-tRF & exclusive (n=133)  
3' terminus relative to 5' stem of T-loop (n=29)

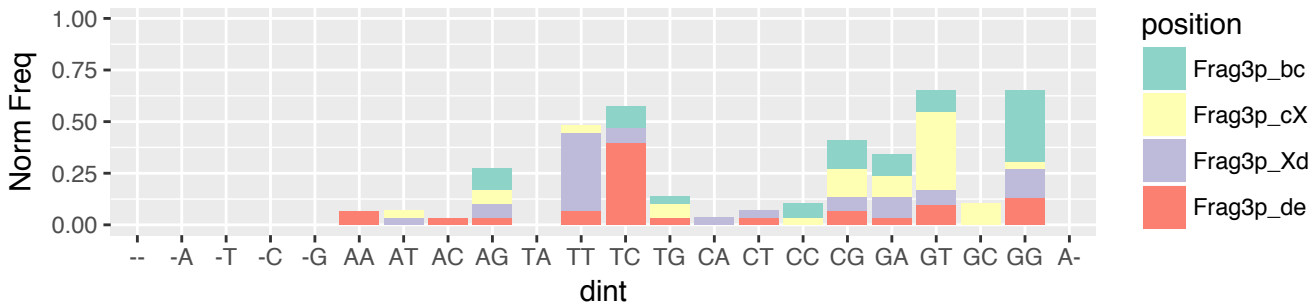

STAD (n=752)  
i-tRF & exclusive (n=133)  
3' terminus relative to 5' stem of T-loop (n=29)

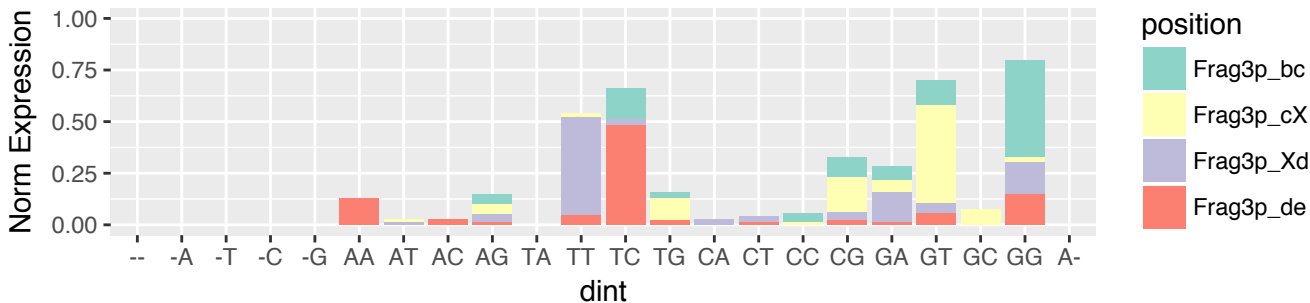

STAD (n=752)  
 i-tRF & exclusive (n=133)  
 3' terminus relative to 3' stem of T-loop (n=27)

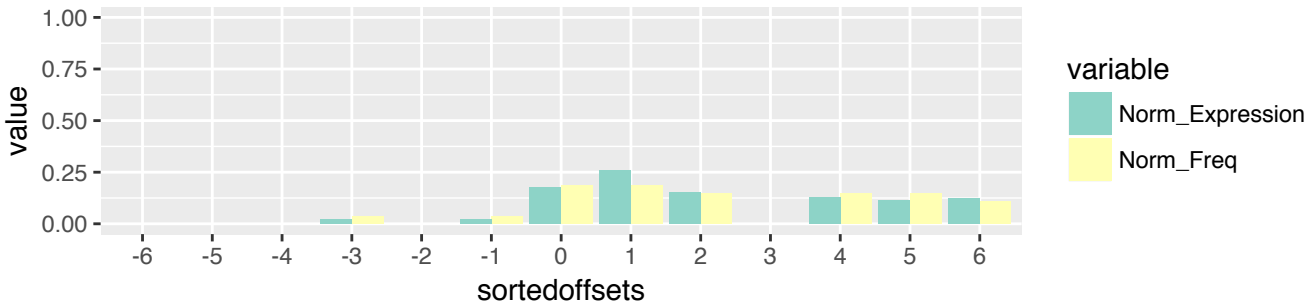

STAD (n=752)  
 i-tRF & exclusive (n=133)  
 3' terminus relative to 3' stem of T-loop (n=27)

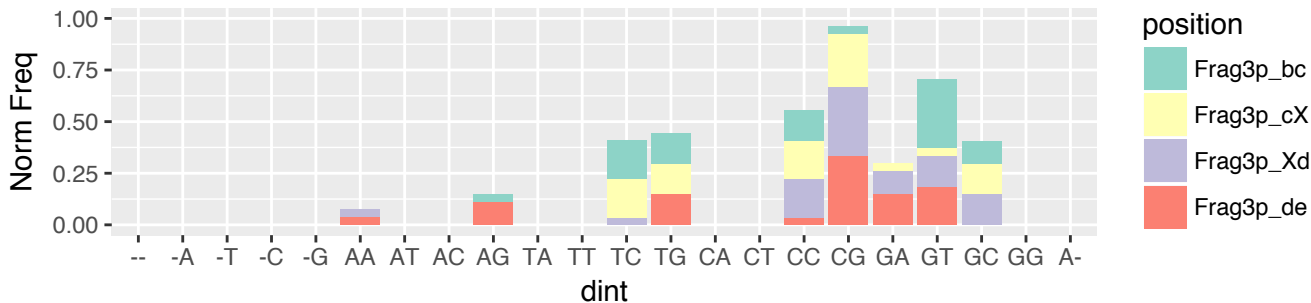

STAD (n=752)  
 i-tRF & exclusive (n=133)  
 3' terminus relative to 3' stem of T-loop (n=27)

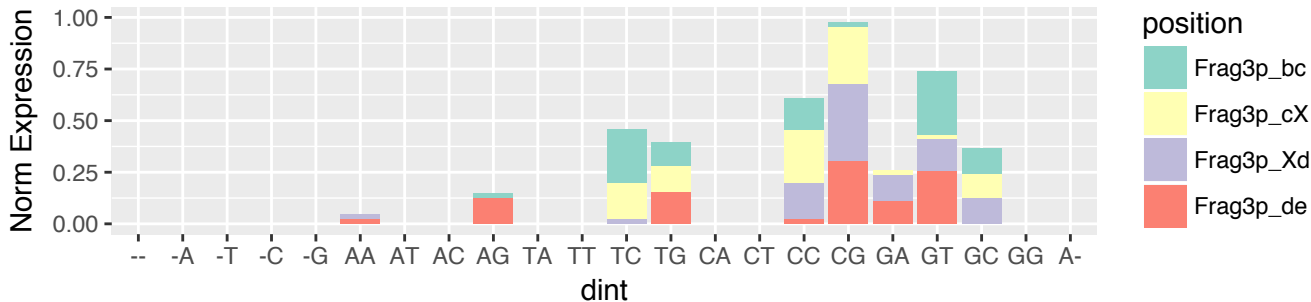

STAD (n=752)  
 i-tRF & exclusive (n=133)  
 3' terminus relative to 3' end of the tRNA (n=13)

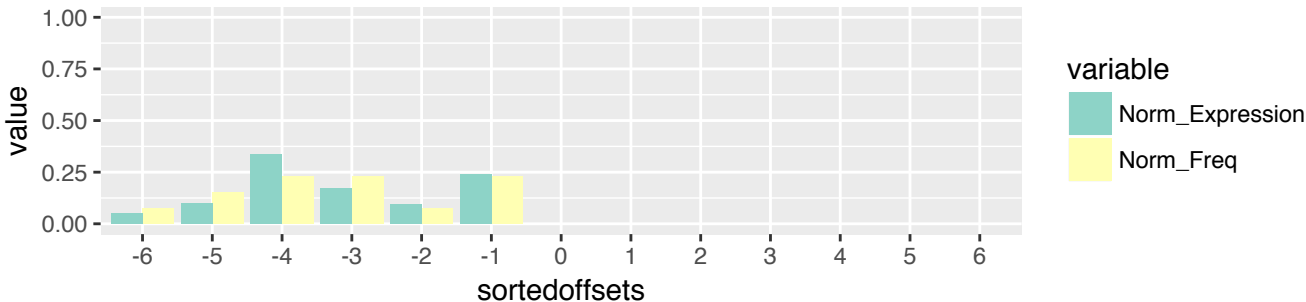

STAD (n=752)  
 i-tRF & exclusive (n=133)  
 3' terminus relative to 3' end of the tRNA (n=13)

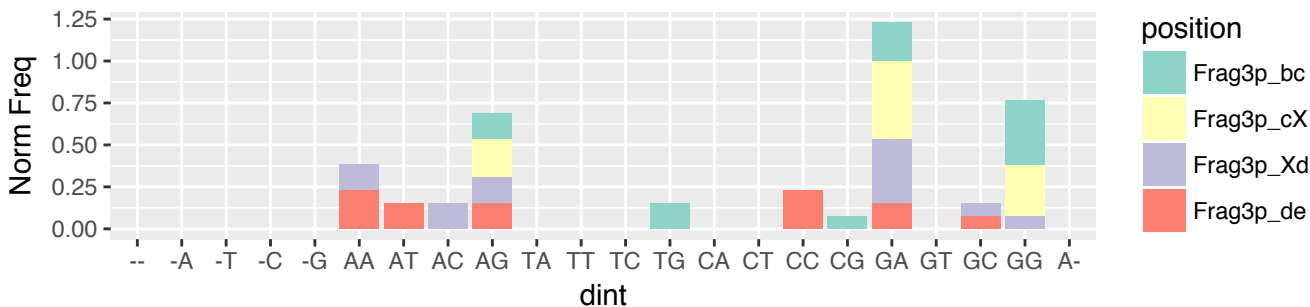

STAD (n=752)  
 i-tRF & exclusive (n=133)  
 3' terminus relative to 3' end of the tRNA (n=13)

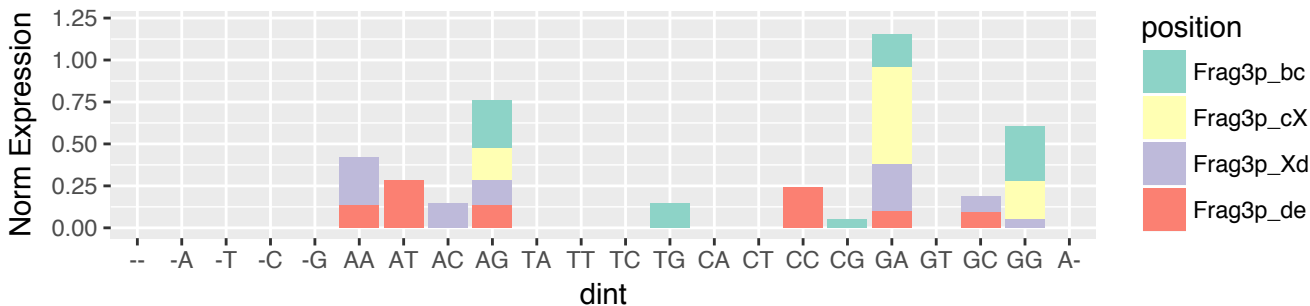

STAD (n=752)  
 3'-tRF & exclusive (n=136)  
 5' terminus relative to 5' stem of T-loop (n=93)

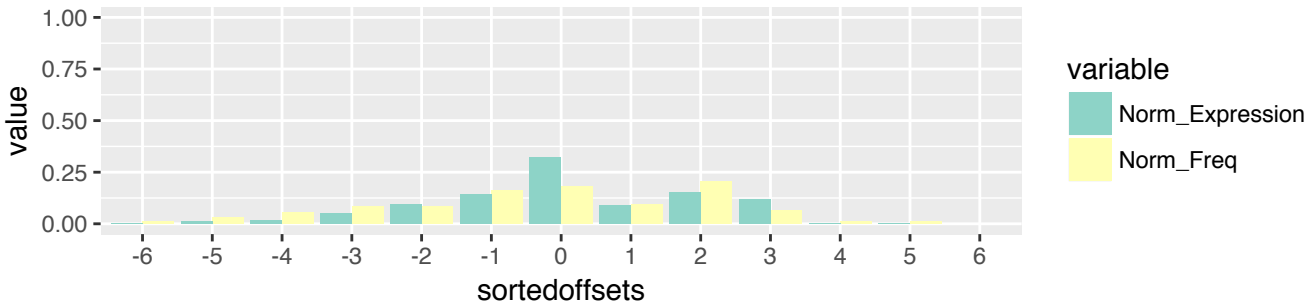

STAD (n=752)  
 3'-tRF & exclusive (n=136)  
 5' terminus relative to 5' stem of T-loop (n=93)

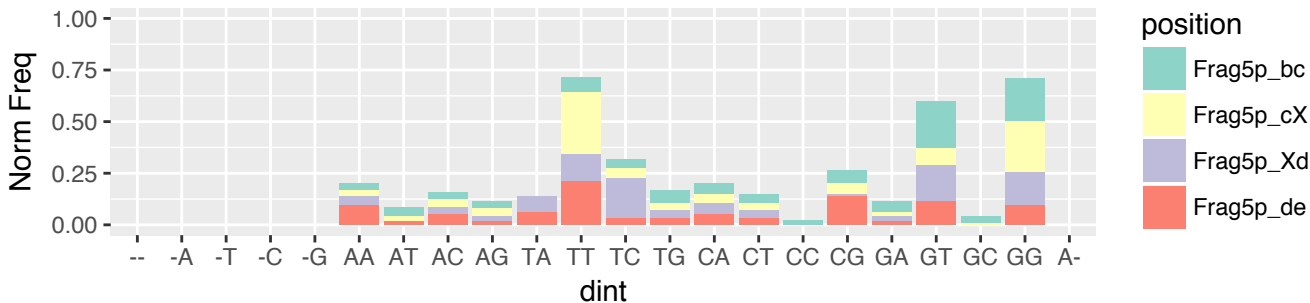

STAD (n=752)  
 3'-tRF & exclusive (n=136)  
 5' terminus relative to 5' stem of T-loop (n=93)

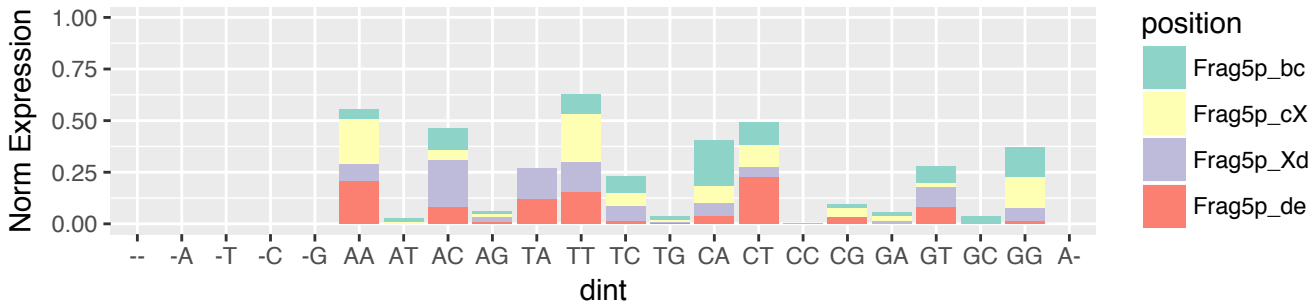

STAD (n=752)  
 3'-tRF & exclusive (n=136)  
 5' terminus relative to 3' stem of T-loop (n=43)

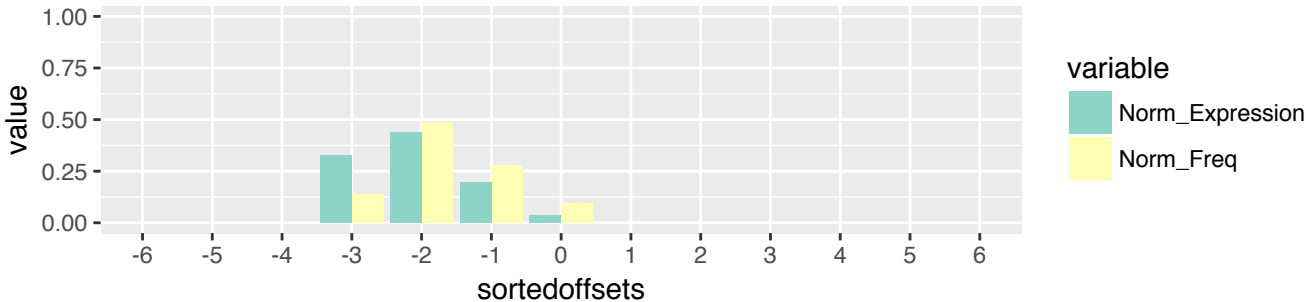

STAD (n=752)  
 3'-tRF & exclusive (n=136)  
 5' terminus relative to 3' stem of T-loop (n=43)

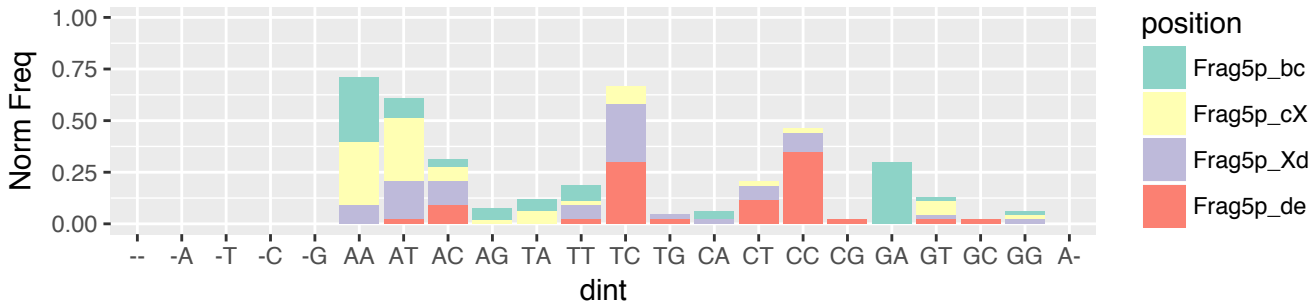

STAD (n=752)  
 3'-tRF & exclusive (n=136)  
 5' terminus relative to 3' stem of T-loop (n=43)

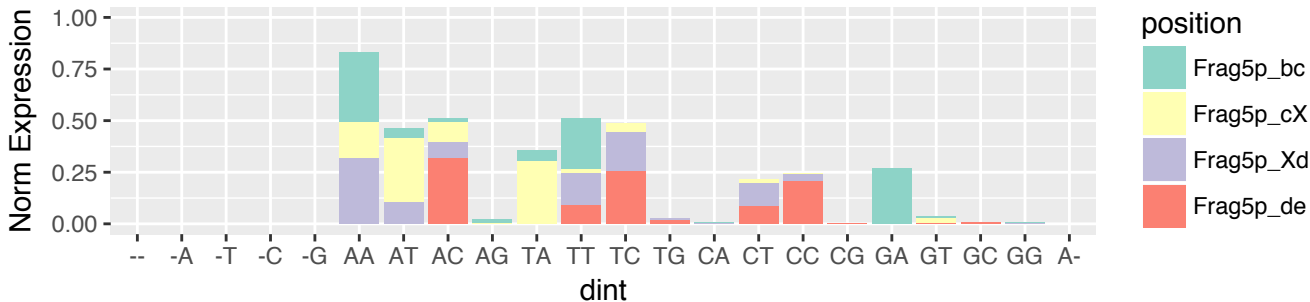

STAD (n=752)  
 3'-tRF & exclusive (n=136)  
 3' terminus relative to 3' end of the tRNA (n=136)

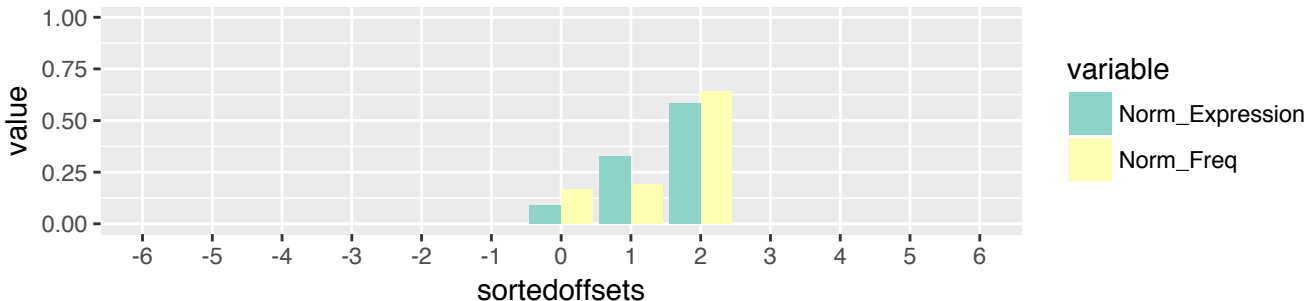

STAD (n=752)  
 3'-tRF & exclusive (n=136)  
 3' terminus relative to 3' end of the tRNA (n=136)

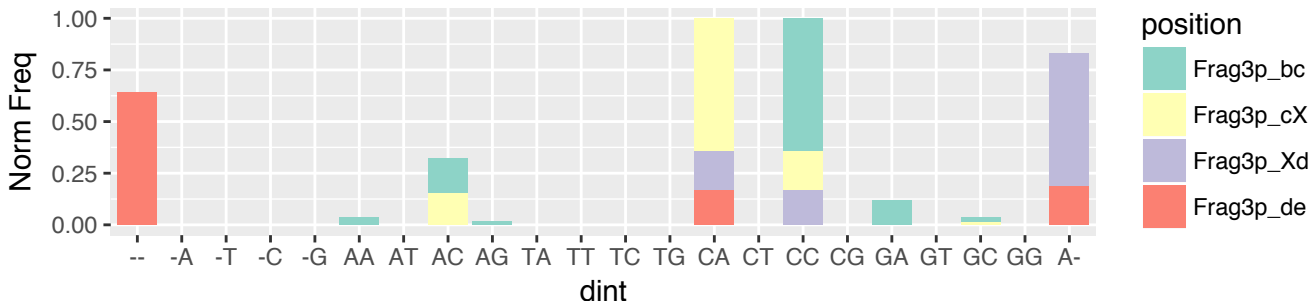

STAD (n=752)  
 3'-tRF & exclusive (n=136)  
 3' terminus relative to 3' end of the tRNA (n=136)

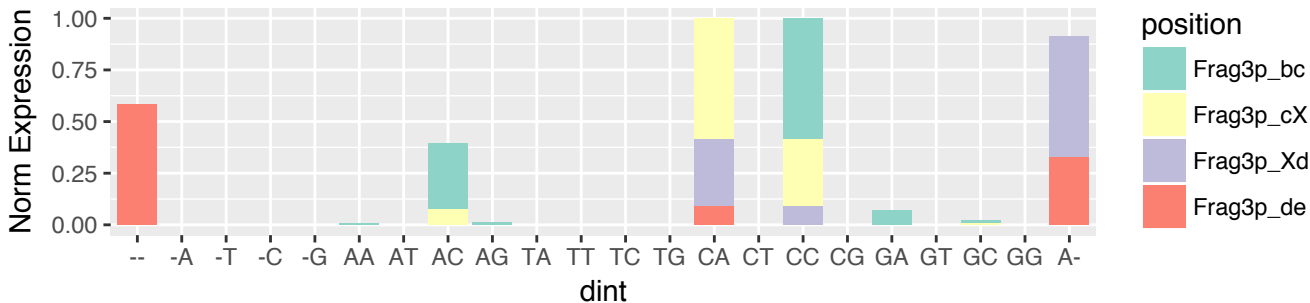

TGCT (n=1095)  
 5'-half & exclusive (n=4)  
 5' terminus relative to 5' end of the tRNA (n=4)



TGCT (n=1095)  
 5'-half & exclusive (n=4)  
 5' terminus relative to 5' end of the tRNA (n=4)



TGCT (n=1095)  
 5'-half & exclusive (n=4)  
 5' terminus relative to 5' end of the tRNA (n=4)

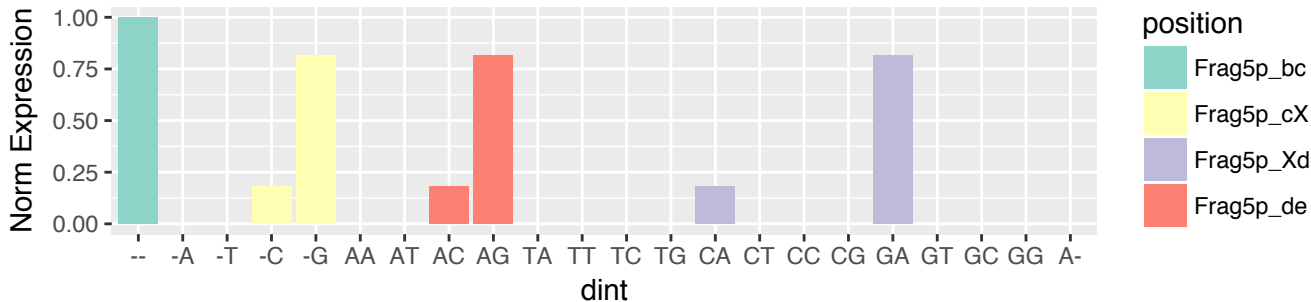



TGCT (n=1095)  
 5'-half & exclusive (n=4)  
 3' terminus relative to 5' stem of A-loop (n=4)

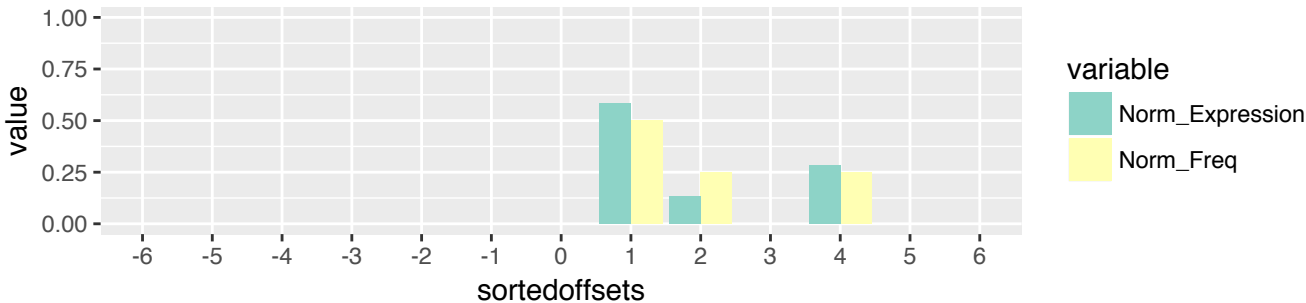

TGCT (n=1095)  
 5'-half & exclusive (n=4)  
 3' terminus relative to 5' stem of A-loop (n=4)

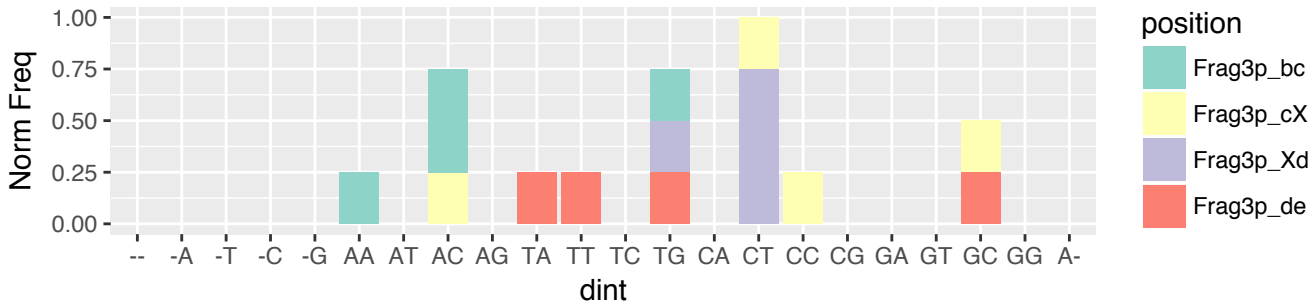

TGCT (n=1095)  
 5'-half & exclusive (n=4)  
 3' terminus relative to 5' stem of A-loop (n=4)

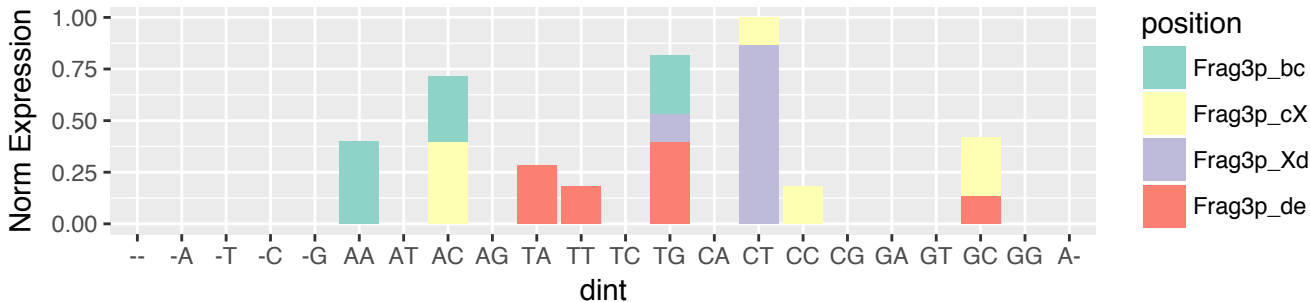

TGCT (n=1095)  
 5'-tRF & exclusive (n=172)  
 5' terminus relative to 5' end of the tRNA (n=172)

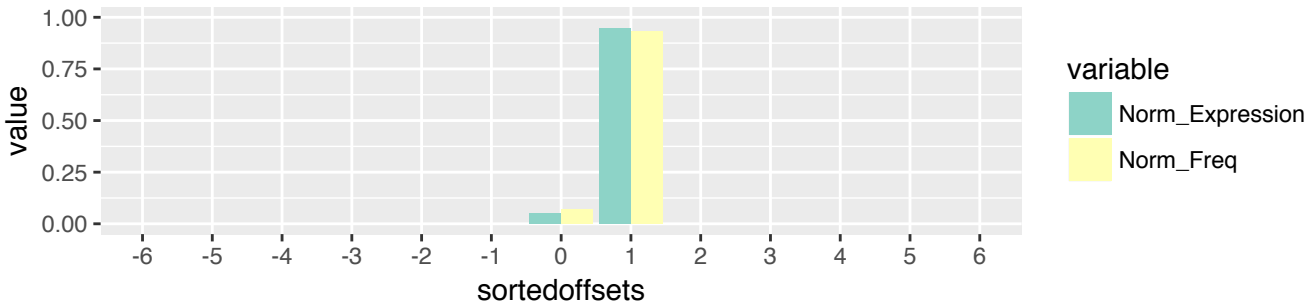

TGCT (n=1095)  
 5'-tRF & exclusive (n=172)  
 5' terminus relative to 5' end of the tRNA (n=172)

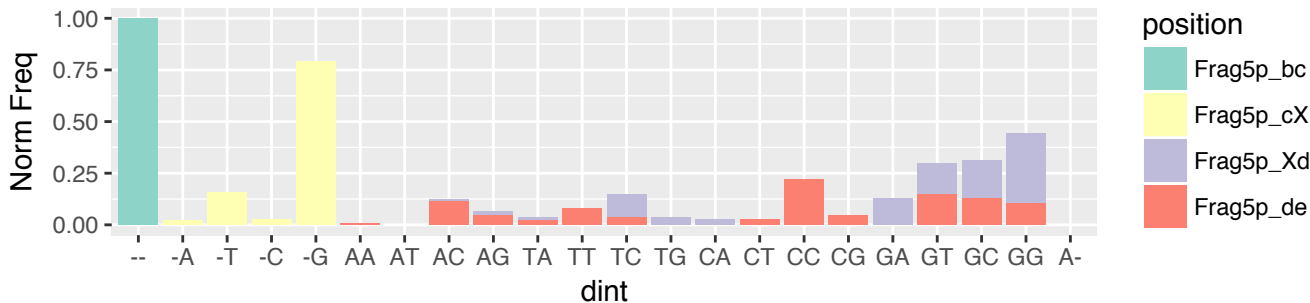

TGCT (n=1095)  
 5'-tRF & exclusive (n=172)  
 5' terminus relative to 5' end of the tRNA (n=172)

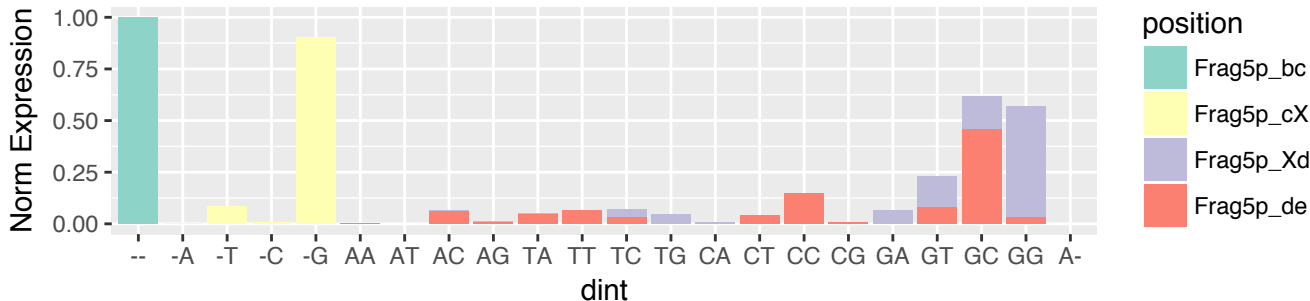

TGCT (n=1095)  
 5'-tRF & exclusive (n=172)  
 3' terminus relative to 5' stem of D-loop (n=5)

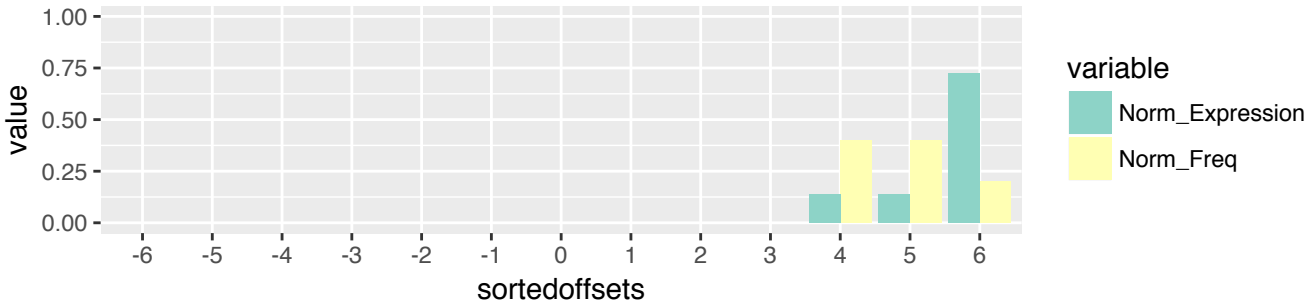

TGCT (n=1095)  
 5'-tRF & exclusive (n=172)  
 3' terminus relative to 5' stem of D-loop (n=5)

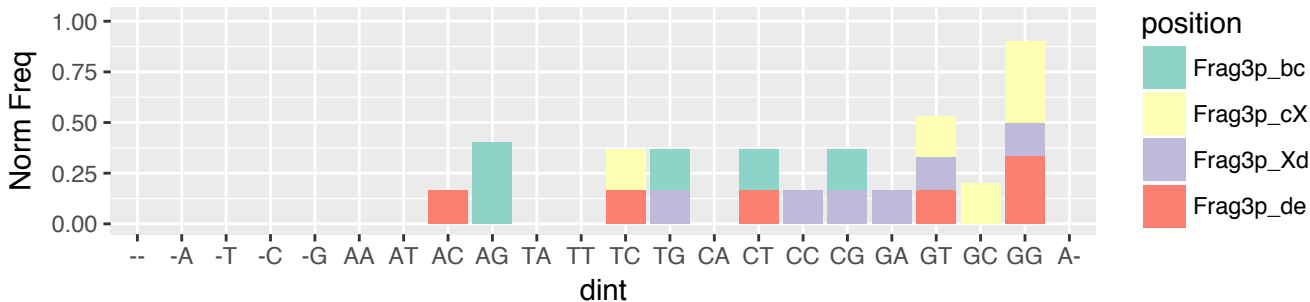

TGCT (n=1095)  
 5'-tRF & exclusive (n=172)  
 3' terminus relative to 5' stem of D-loop (n=5)

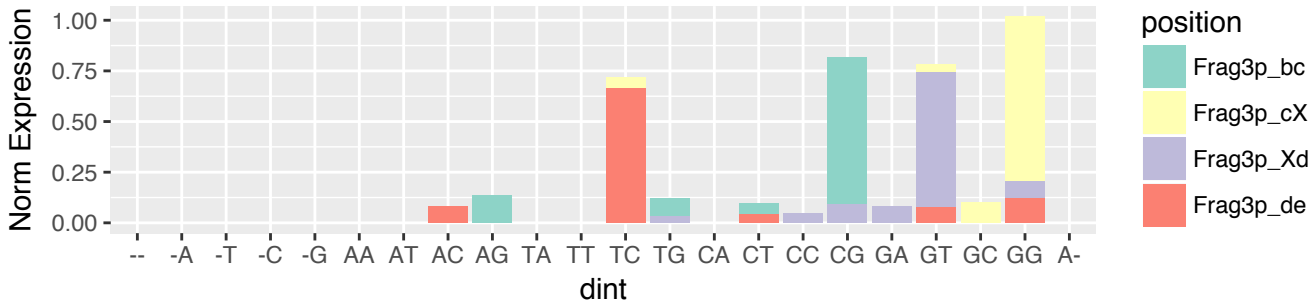

TGCT (n=1095)  
 5'-tRF & exclusive (n=172)  
 3' terminus relative to 3' stem of D-loop (n=152)

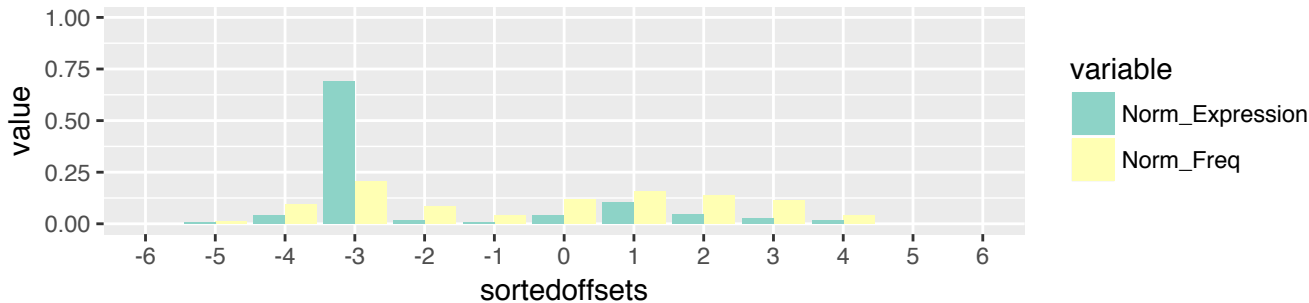

TGCT (n=1095)  
 5'-tRF & exclusive (n=172)  
 3' terminus relative to 3' stem of D-loop (n=152)

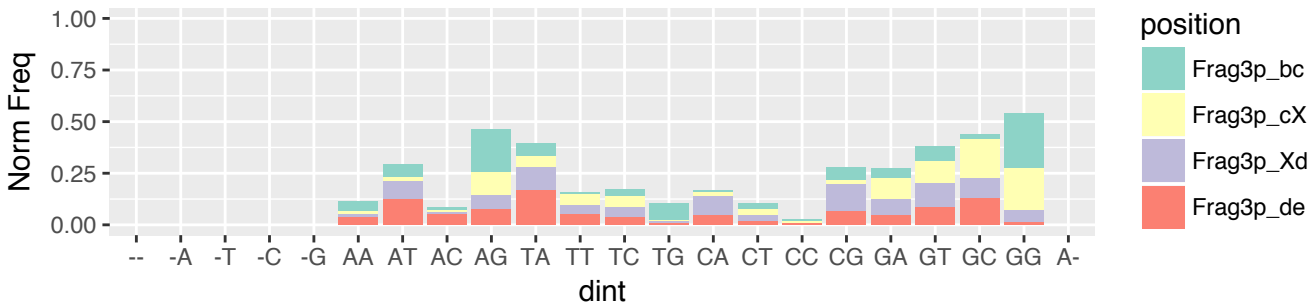

TGCT (n=1095)  
 5'-tRF & exclusive (n=172)  
 3' terminus relative to 3' stem of D-loop (n=152)

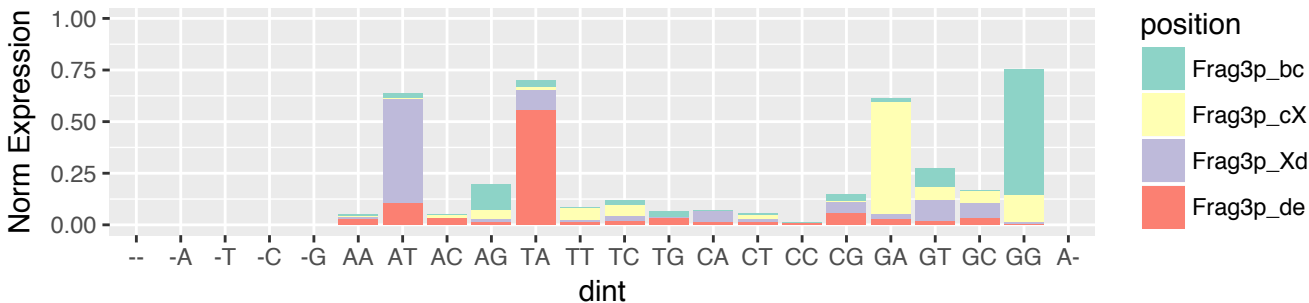

TGCT (n=1095)  
 5'-tRF & exclusive (n=172)  
 3' terminus relative to 5' stem of A-loop (n=9)

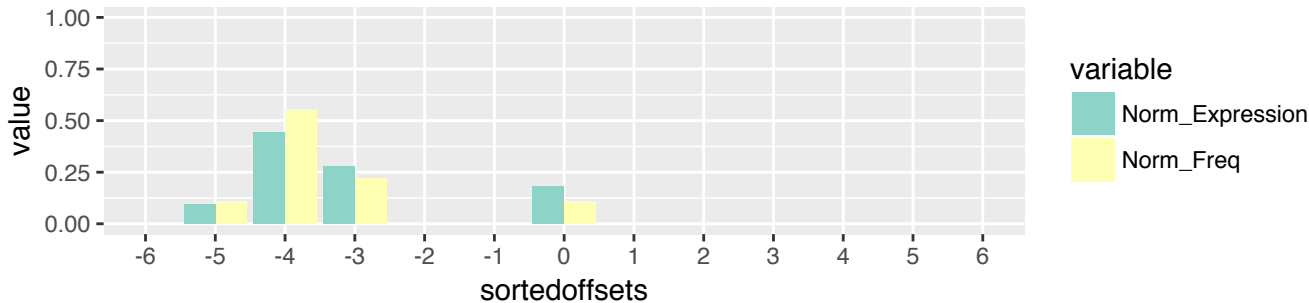

TGCT (n=1095)  
 5'-tRF & exclusive (n=172)  
 3' terminus relative to 5' stem of A-loop (n=9)

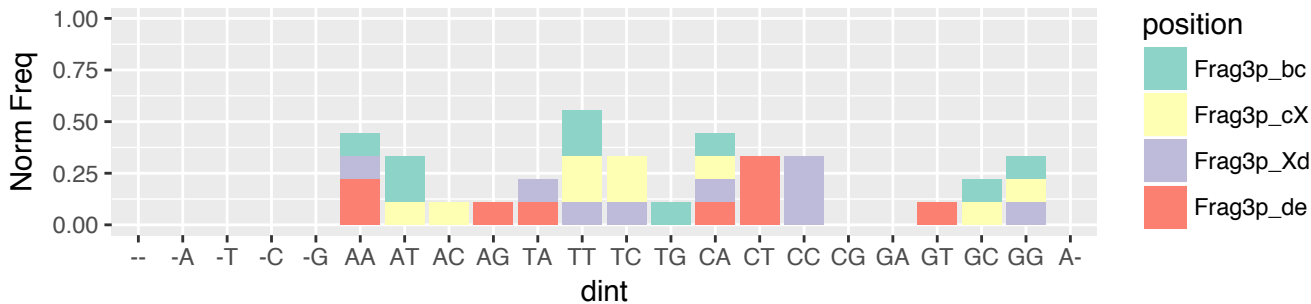

TGCT (n=1095)  
 5'-tRF & exclusive (n=172)  
 3' terminus relative to 5' stem of A-loop (n=9)

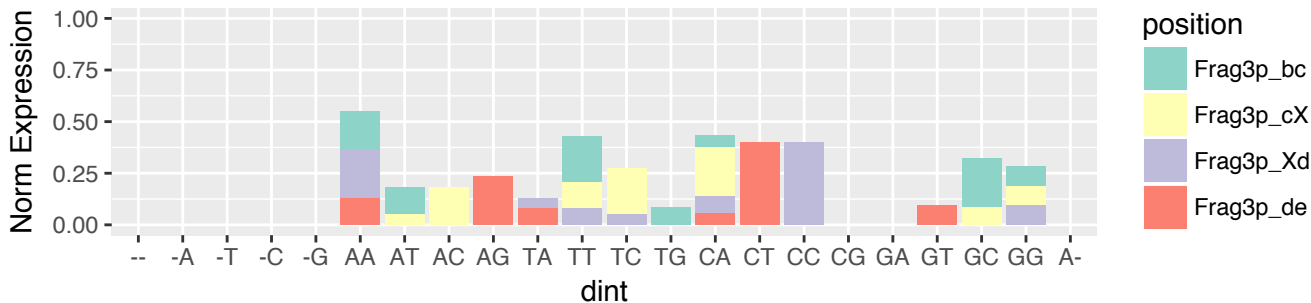

TGCT (n=1095)  
 5'-tRF & exclusive (n=172)  
 3' terminus relative to 3' stem of A-loop (n=6)

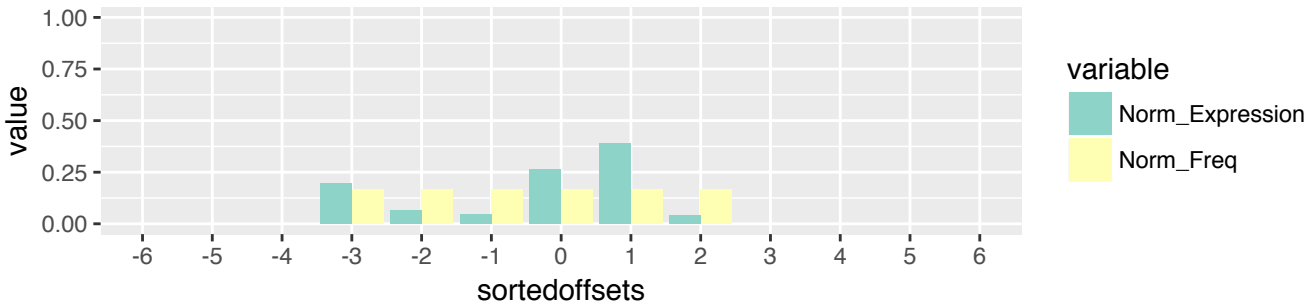

TGCT (n=1095)  
 5'-tRF & exclusive (n=172)  
 3' terminus relative to 3' stem of A-loop (n=6)

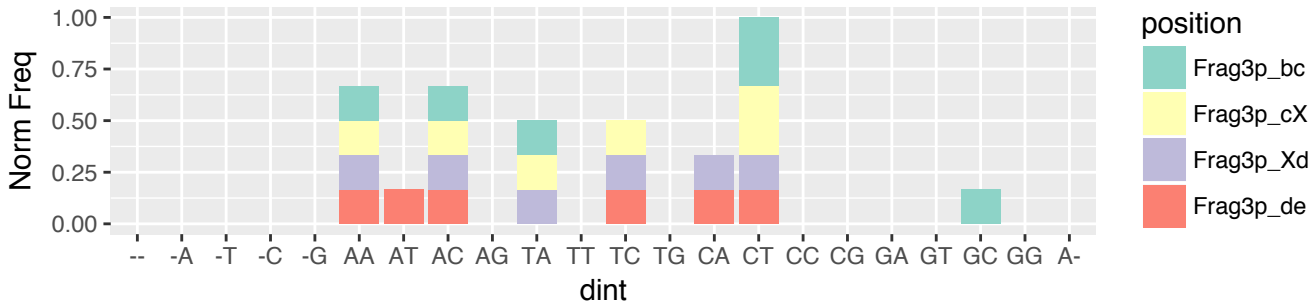

TGCT (n=1095)  
 5'-tRF & exclusive (n=172)  
 3' terminus relative to 3' stem of A-loop (n=6)

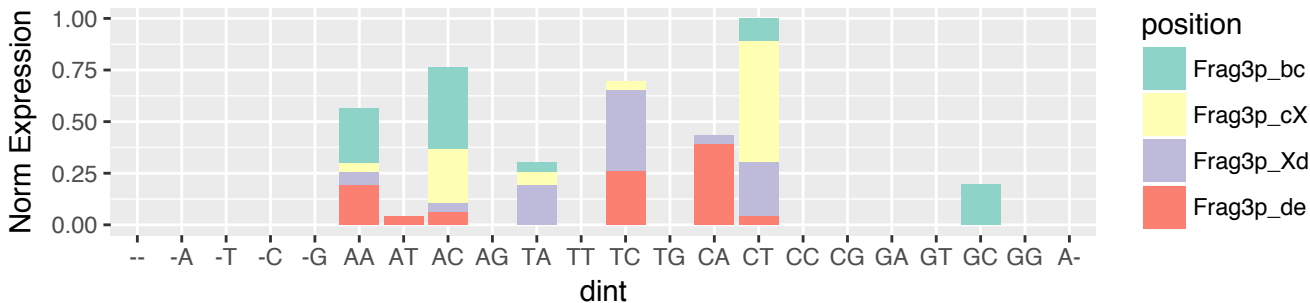

TGCT (n=1095)  
i-tRF & exclusive (n=266)  
5' terminus relative to 5' end of the tRNA (n=15)

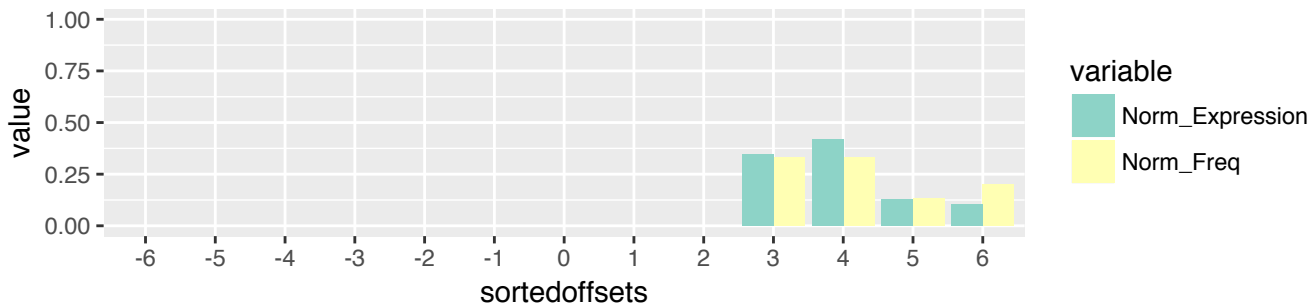

TGCT (n=1095)  
i-tRF & exclusive (n=266)  
5' terminus relative to 5' end of the tRNA (n=15)

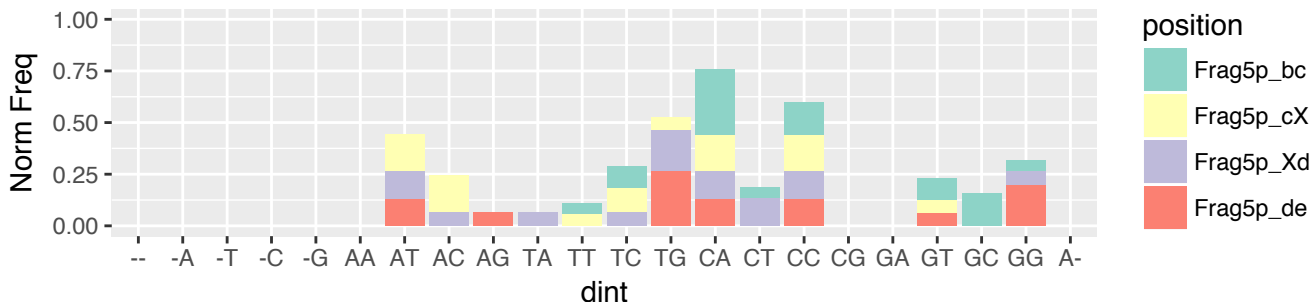

TGCT (n=1095)  
i-tRF & exclusive (n=266)  
5' terminus relative to 5' end of the tRNA (n=15)

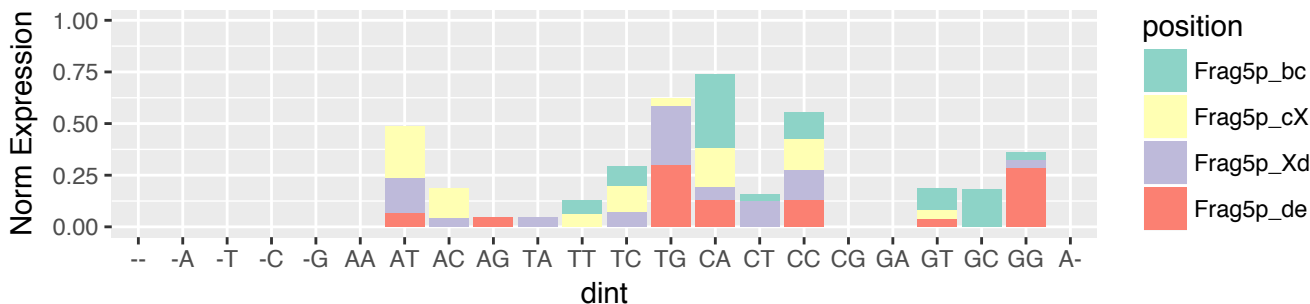

TGCT (n=1095)  
 i-tRF & exclusive (n=266)  
 5' terminus relative to 5' stem of D-loop (n=105)

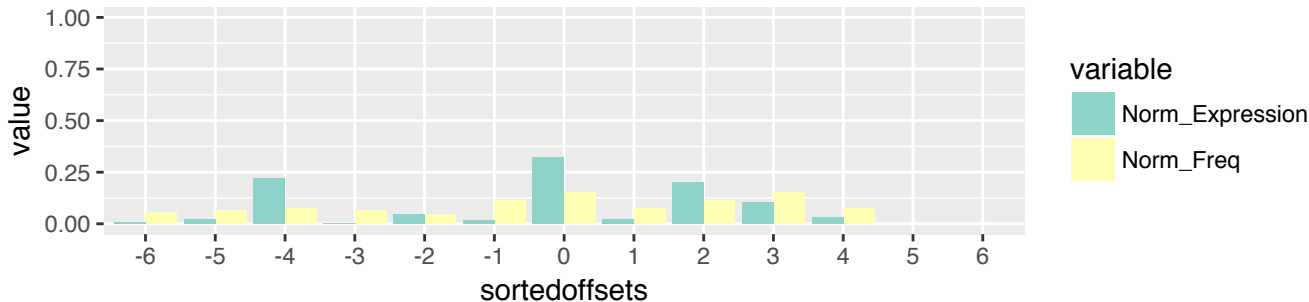

TGCT (n=1095)  
 i-tRF & exclusive (n=266)  
 5' terminus relative to 5' stem of D-loop (n=105)

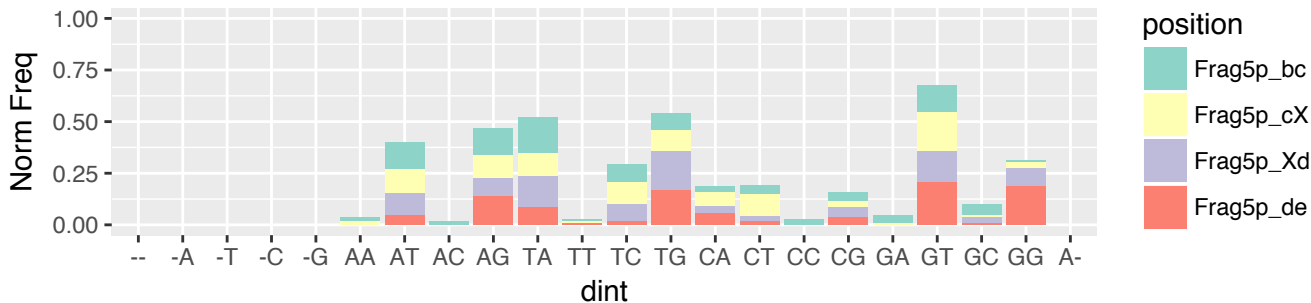

TGCT (n=1095)  
 i-tRF & exclusive (n=266)  
 5' terminus relative to 5' stem of D-loop (n=105)

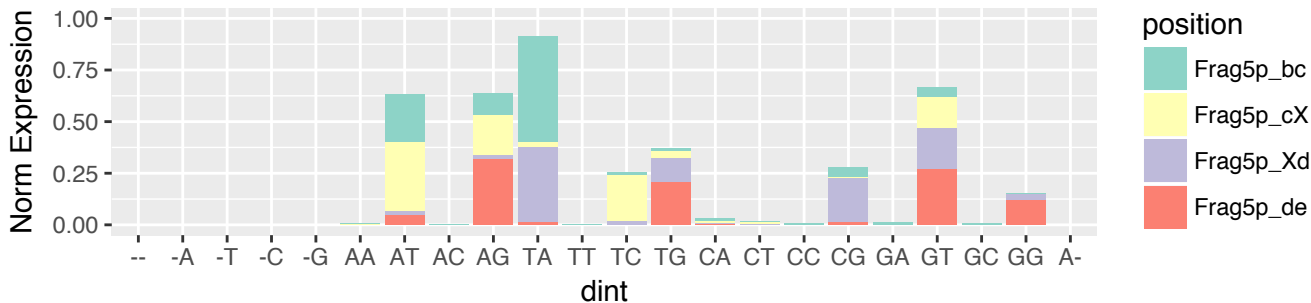



TGCT (n=1095)  
 i-tRF & exclusive (n=266)  
 5' terminus relative to 3' stem of D-loop (n=13)

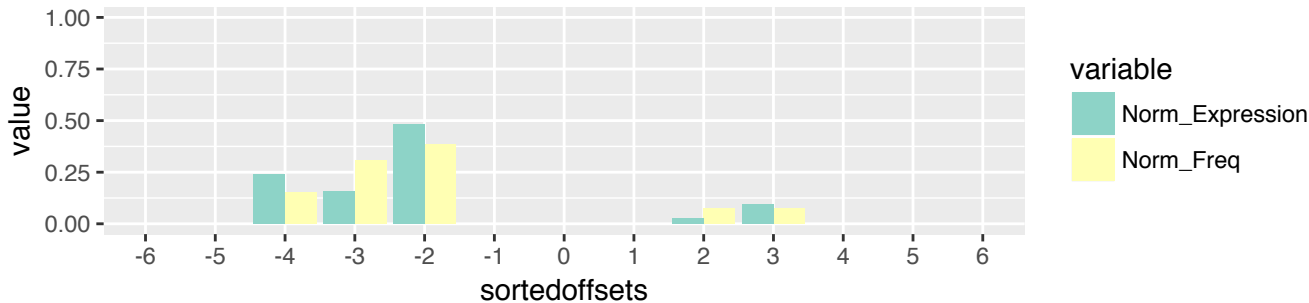

TGCT (n=1095)  
 i-tRF & exclusive (n=266)  
 5' terminus relative to 3' stem of D-loop (n=13)

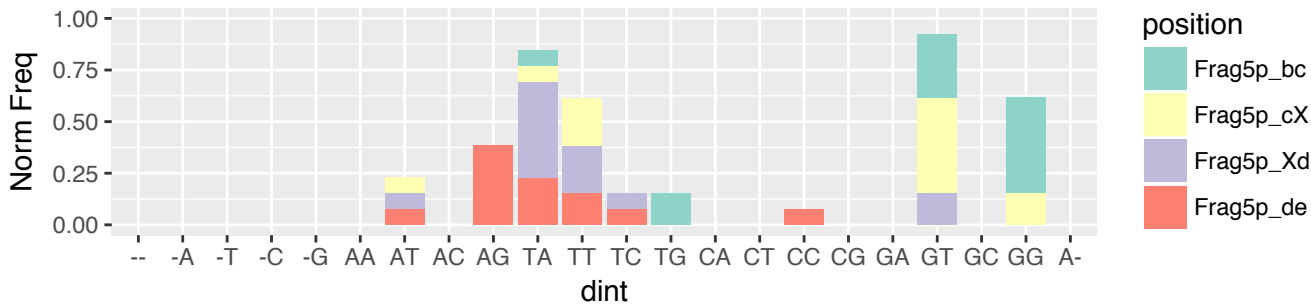

TGCT (n=1095)  
 i-tRF & exclusive (n=266)  
 5' terminus relative to 3' stem of D-loop (n=13)

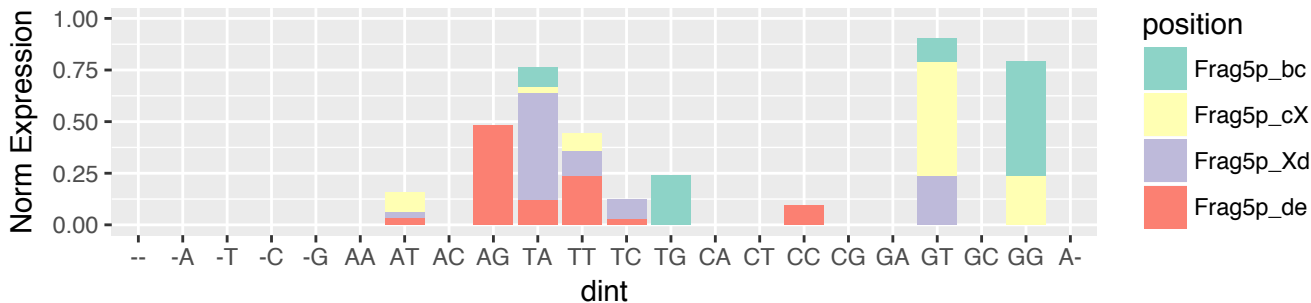

TGCT (n=1095)  
 i-tRF & exclusive (n=266)  
 5' terminus relative to 5' stem of A-loop (n=62)

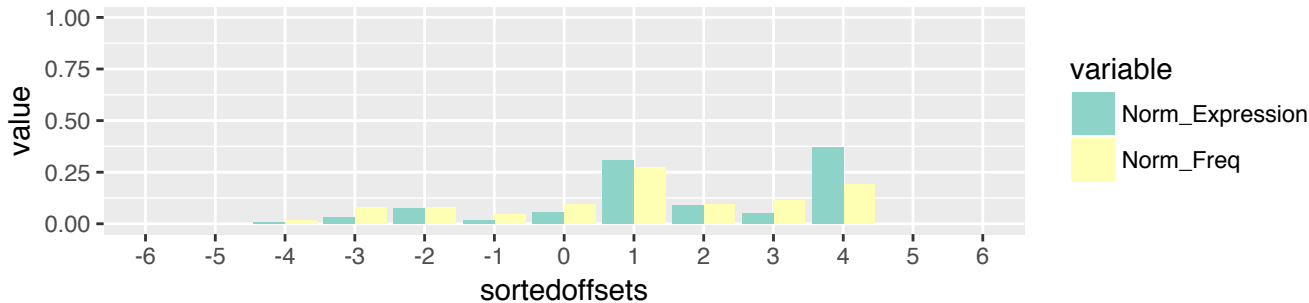

TGCT (n=1095)  
 i-tRF & exclusive (n=266)  
 5' terminus relative to 5' stem of A-loop (n=62)

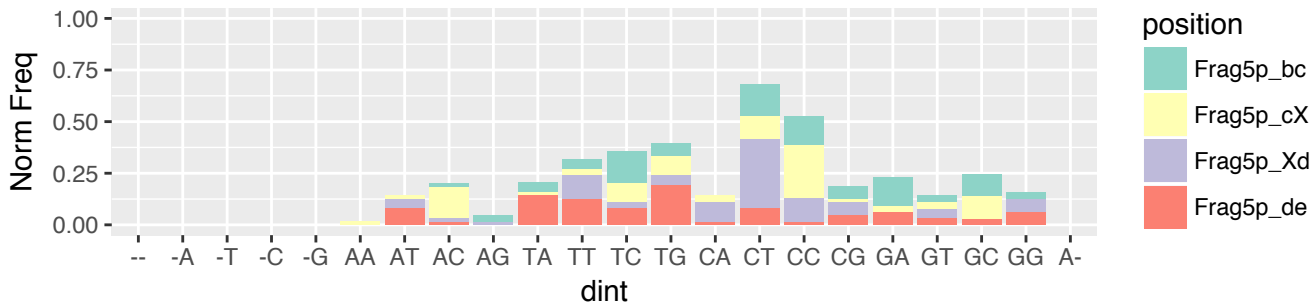

TGCT (n=1095)  
 i-tRF & exclusive (n=266)  
 5' terminus relative to 5' stem of A-loop (n=62)

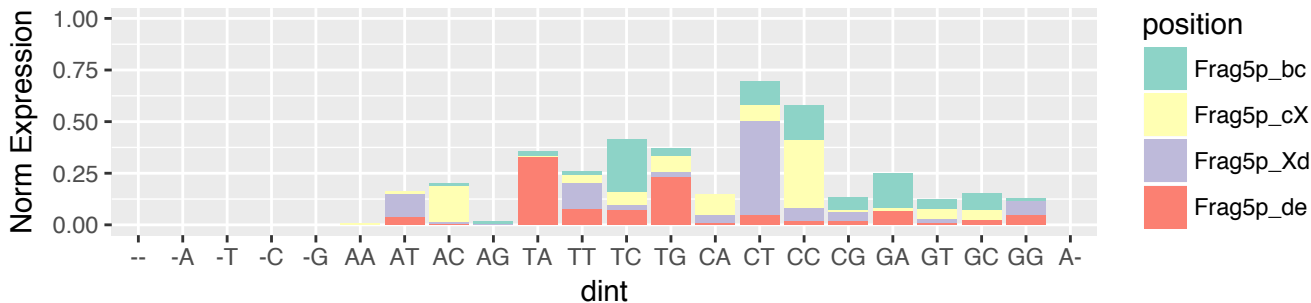

TGCT (n=1095)  
i-tRF & exclusive (n=266)  
5' terminus relative to 3' stem of A-loop (n=62)

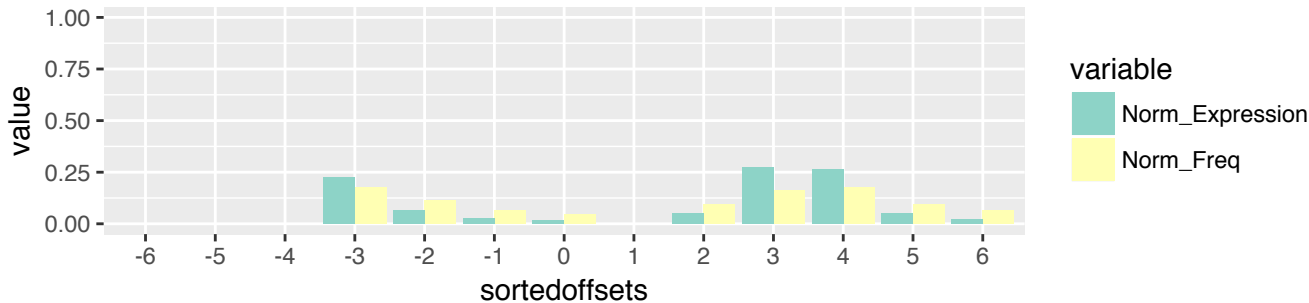

TGCT (n=1095)  
i-tRF & exclusive (n=266)  
5' terminus relative to 3' stem of A-loop (n=62)

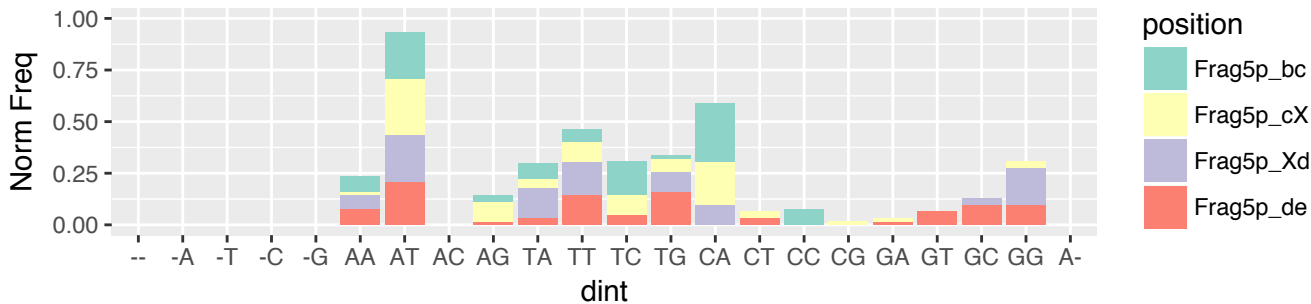

TGCT (n=1095)  
i-tRF & exclusive (n=266)  
5' terminus relative to 3' stem of A-loop (n=62)

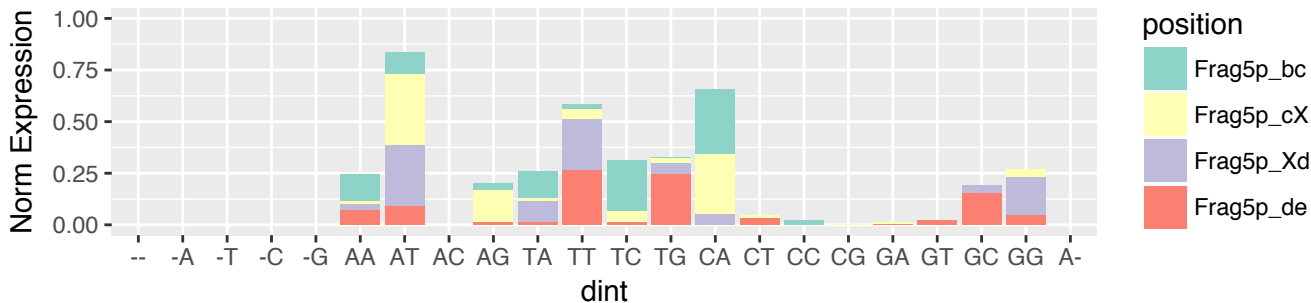

TGCT (n=1095)  
 i-tRF & exclusive (n=266)  
 5' terminus relative to 5' stem of T-loop (n=9)

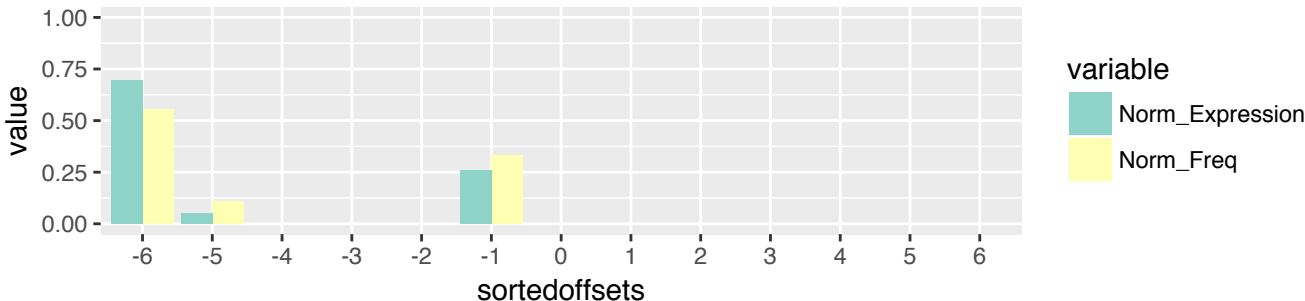

TGCT (n=1095)  
 i-tRF & exclusive (n=266)  
 5' terminus relative to 5' stem of T-loop (n=9)

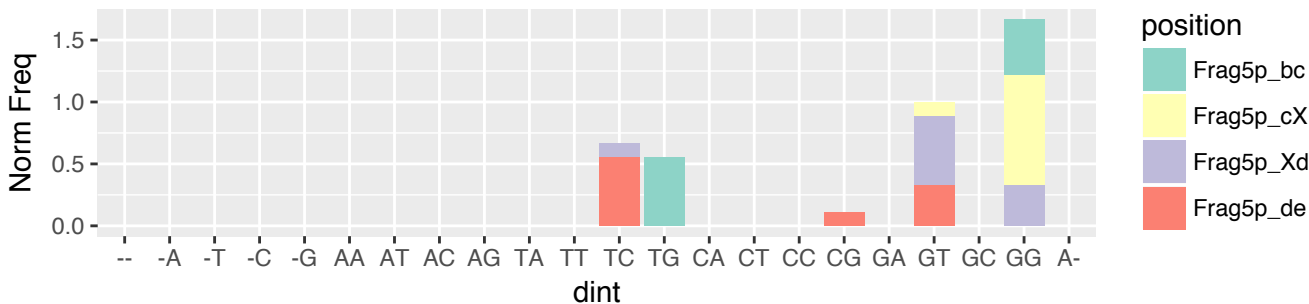

TGCT (n=1095)  
 i-tRF & exclusive (n=266)  
 5' terminus relative to 5' stem of T-loop (n=9)

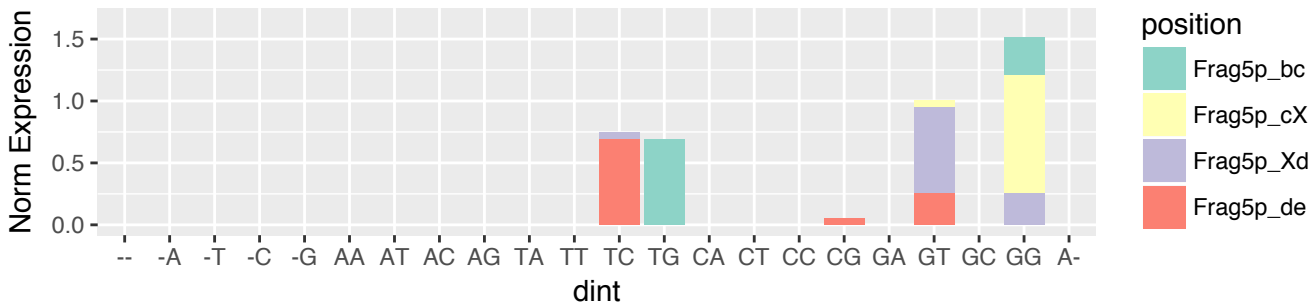

TGCT (n=1095)  
i-tRF & exclusive (n=266)  
3' terminus relative to 3' stem of D-loop (n=1)

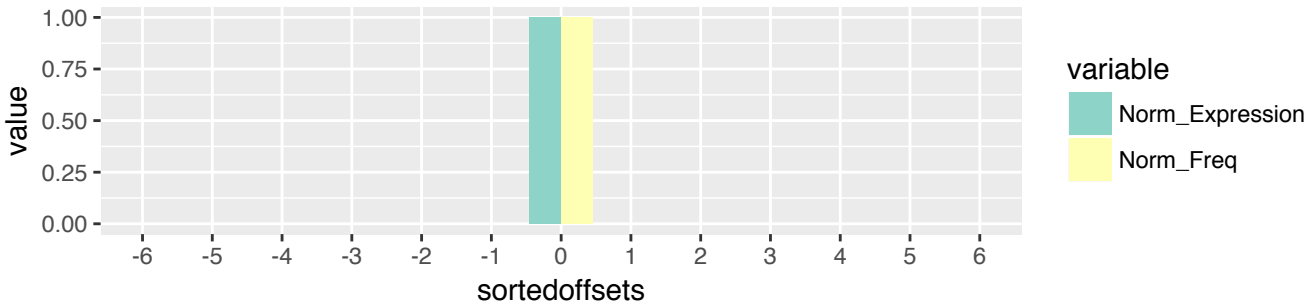

TGCT (n=1095)  
i-tRF & exclusive (n=266)  
3' terminus relative to 3' stem of D-loop (n=1)

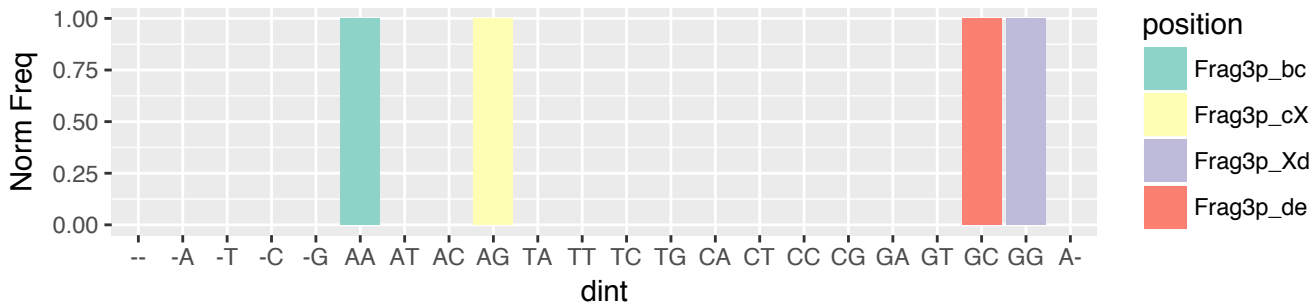

TGCT (n=1095)  
i-tRF & exclusive (n=266)  
3' terminus relative to 3' stem of D-loop (n=1)

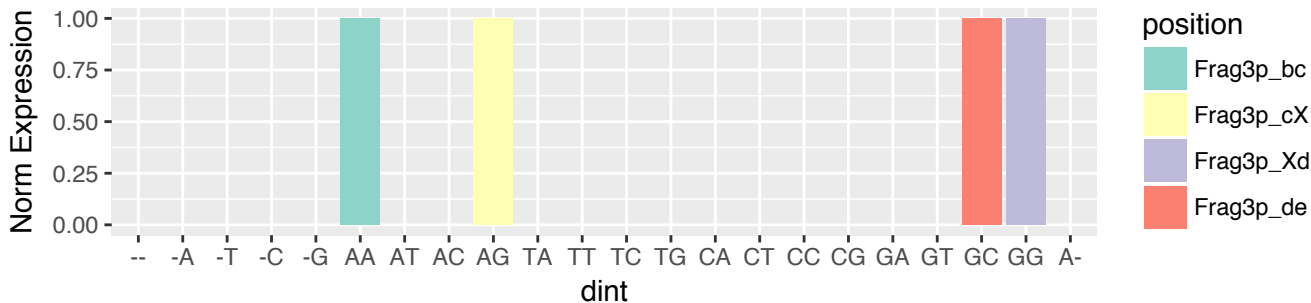

TGCT (n=1095)  
i-tRF & exclusive (n=266)  
3' terminus relative to 5' stem of A-loop (n=102)

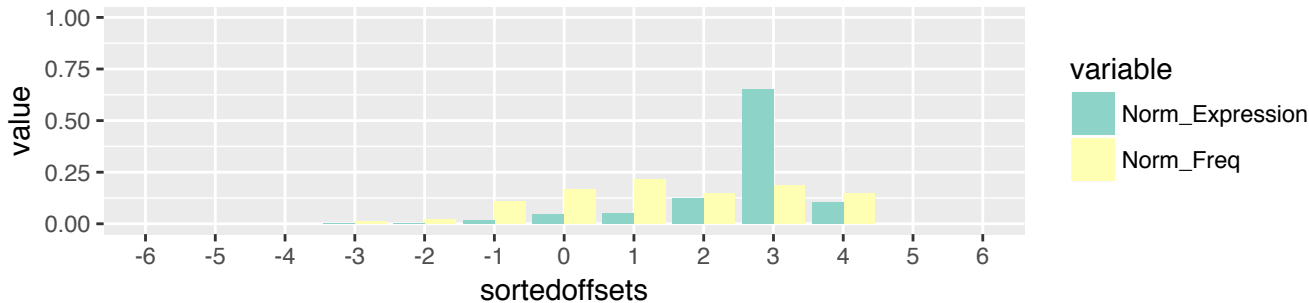

TGCT (n=1095)  
i-tRF & exclusive (n=266)  
3' terminus relative to 5' stem of A-loop (n=102)

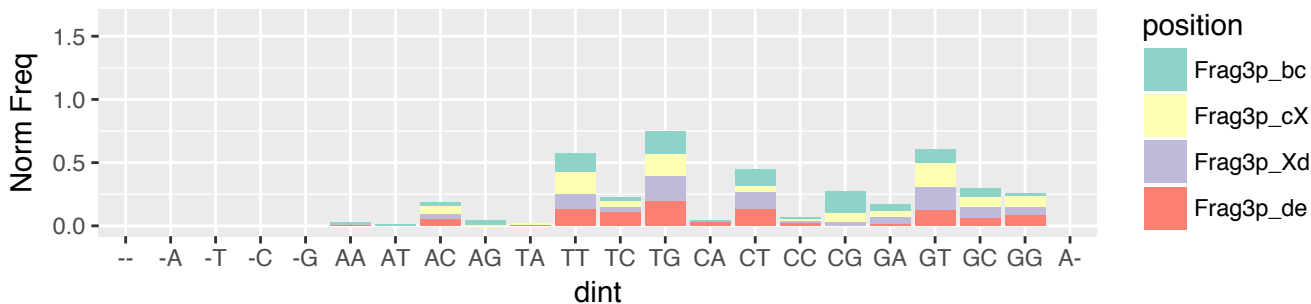

TGCT (n=1095)  
i-tRF & exclusive (n=266)  
3' terminus relative to 5' stem of A-loop (n=102)

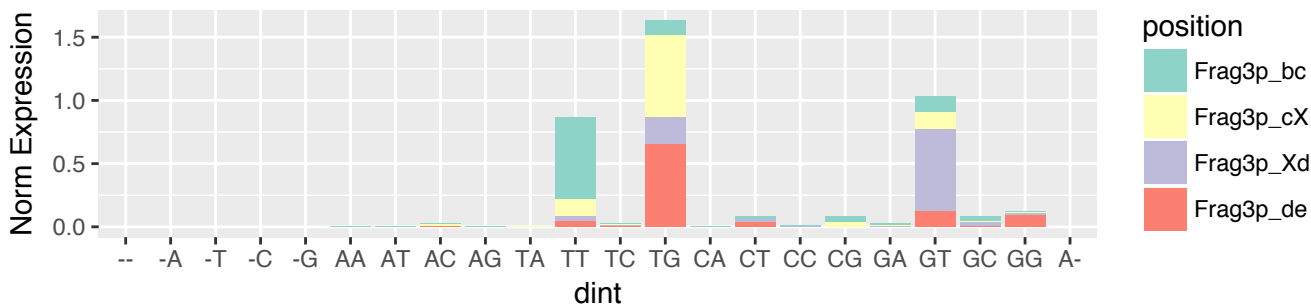

TGCT (n=1095)  
i-tRF & exclusive (n=266)  
3' terminus relative to 3' stem of A-loop (n=34)

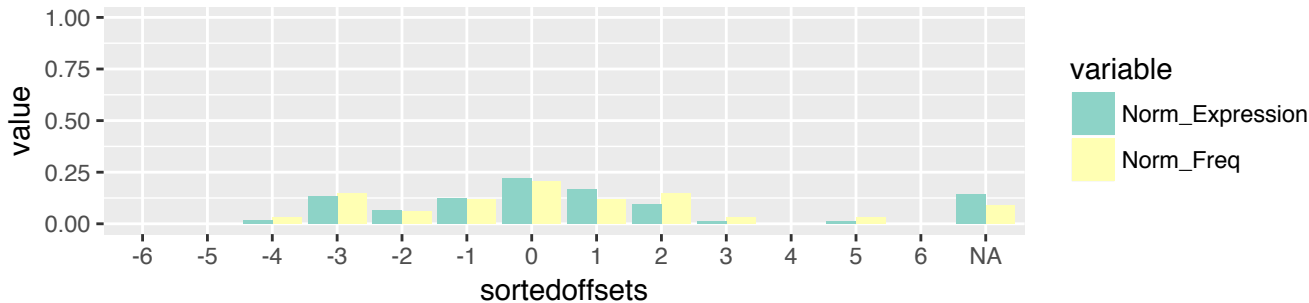

TGCT (n=1095)  
i-tRF & exclusive (n=266)  
3' terminus relative to 3' stem of A-loop (n=34)

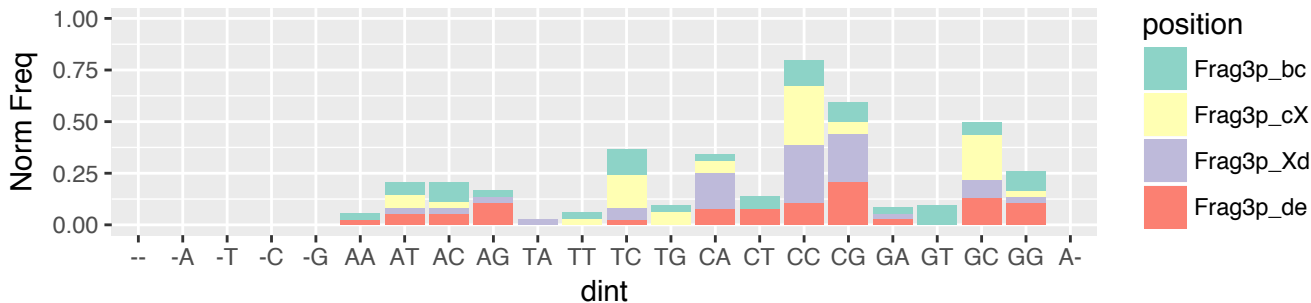

TGCT (n=1095)  
i-tRF & exclusive (n=266)  
3' terminus relative to 3' stem of A-loop (n=34)

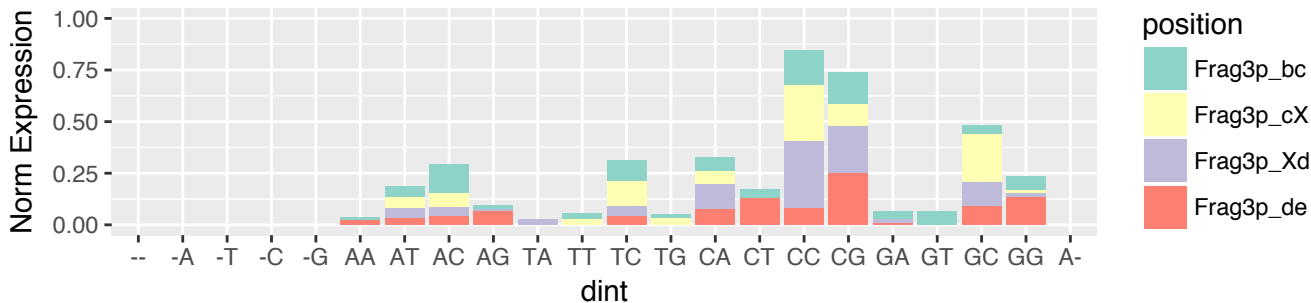

TGCT (n=1095)  
i-tRF & exclusive (n=266)  
3' terminus relative to 5' stem of T-loop (n=70)

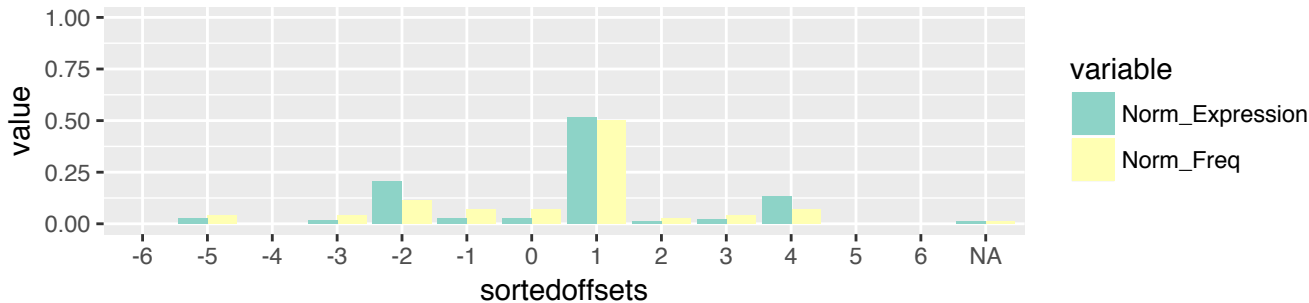

TGCT (n=1095)  
i-tRF & exclusive (n=266)  
3' terminus relative to 5' stem of T-loop (n=70)

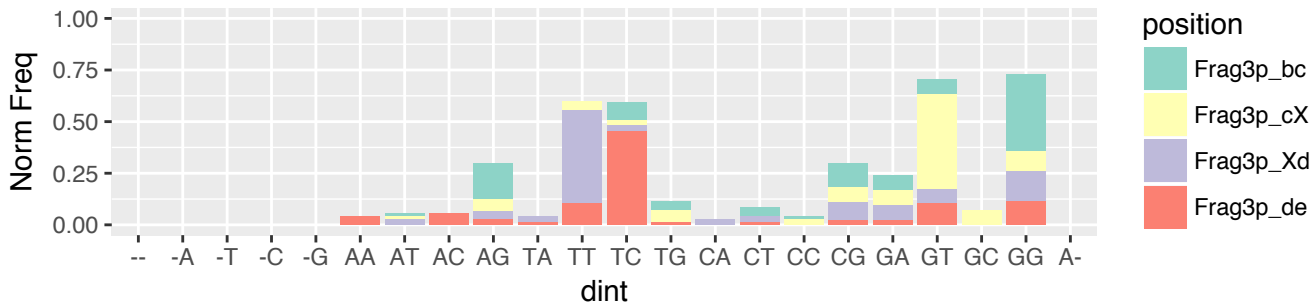

TGCT (n=1095)  
i-tRF & exclusive (n=266)  
3' terminus relative to 5' stem of T-loop (n=70)

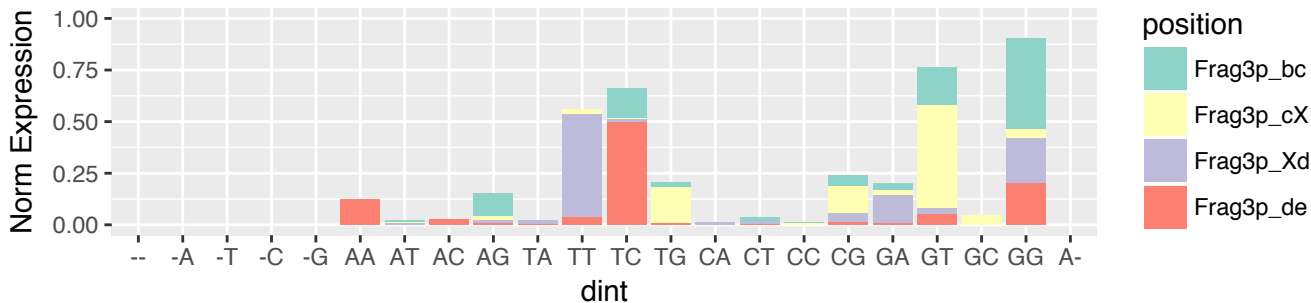



TGCT (n=1095)  
 i-tRF & exclusive (n=266)  
 3' terminus relative to 3' stem of T-loop (n=45)

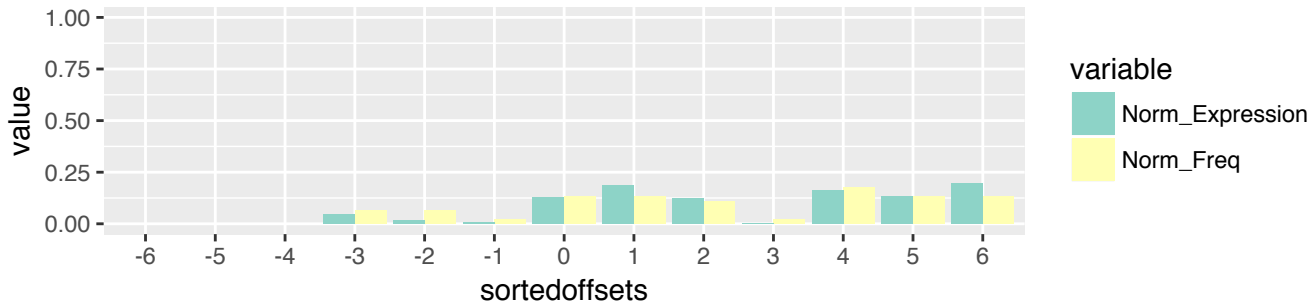

TGCT (n=1095)  
 i-tRF & exclusive (n=266)  
 3' terminus relative to 3' stem of T-loop (n=45)

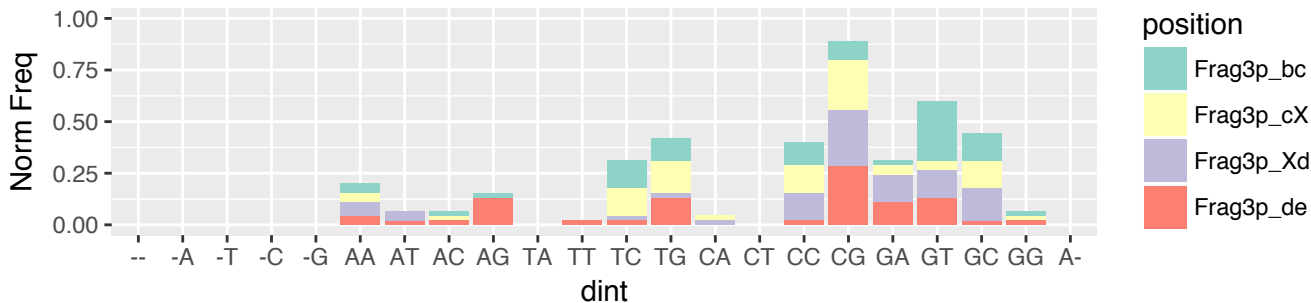

TGCT (n=1095)  
 i-tRF & exclusive (n=266)  
 3' terminus relative to 3' stem of T-loop (n=45)

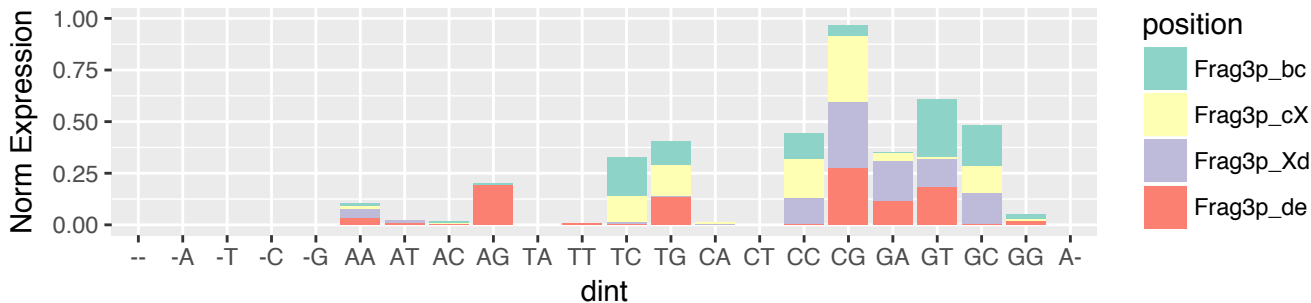

TGCT (n=1095)  
 i-tRF & exclusive (n=266)  
 3' terminus relative to 3' end of the tRNA (n=16)

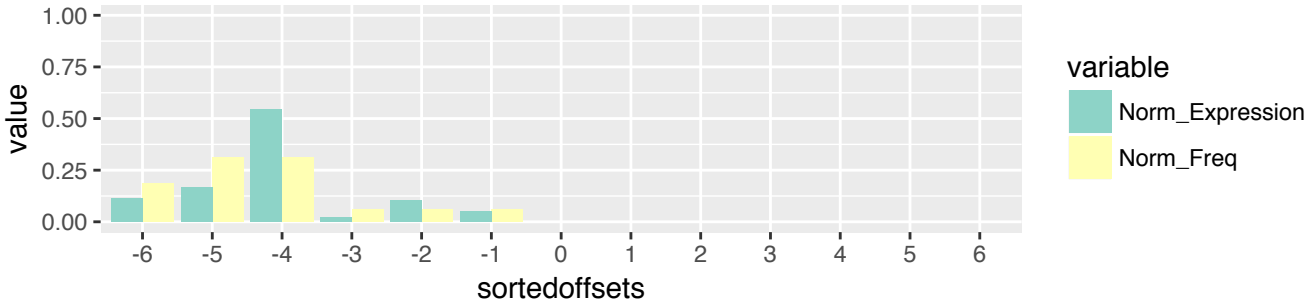

TGCT (n=1095)  
 i-tRF & exclusive (n=266)  
 3' terminus relative to 3' end of the tRNA (n=16)

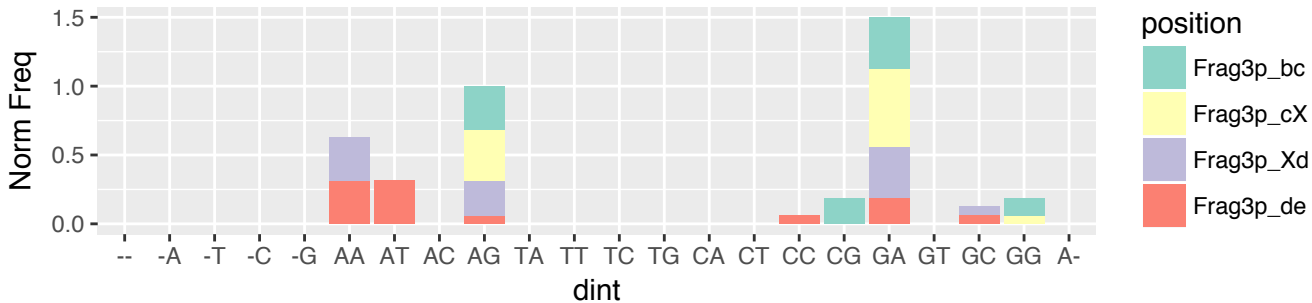

TGCT (n=1095)  
 i-tRF & exclusive (n=266)  
 3' terminus relative to 3' end of the tRNA (n=16)

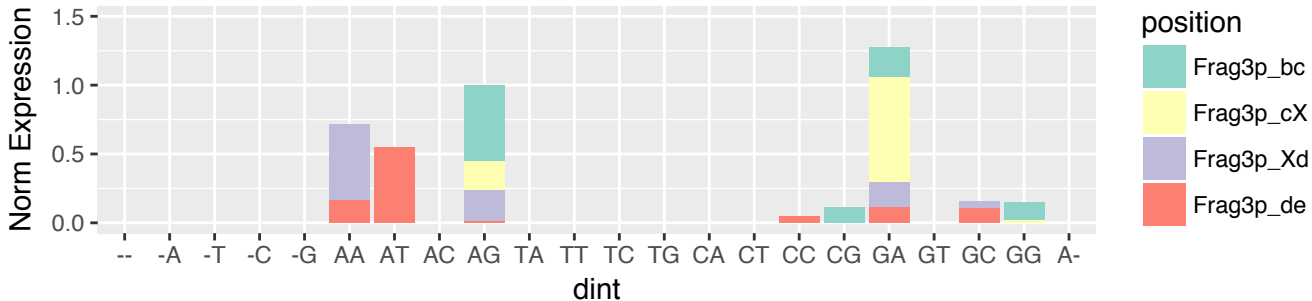

TGCT (n=1095)  
 3'-tRF & exclusive (n=159)  
 5' terminus relative to 5' stem of T-loop (n=111)

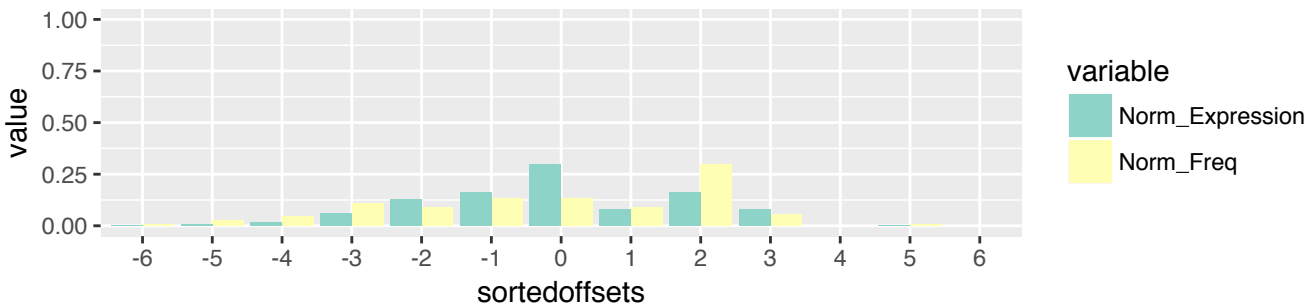

TGCT (n=1095)  
 3'-tRF & exclusive (n=159)  
 5' terminus relative to 5' stem of T-loop (n=111)

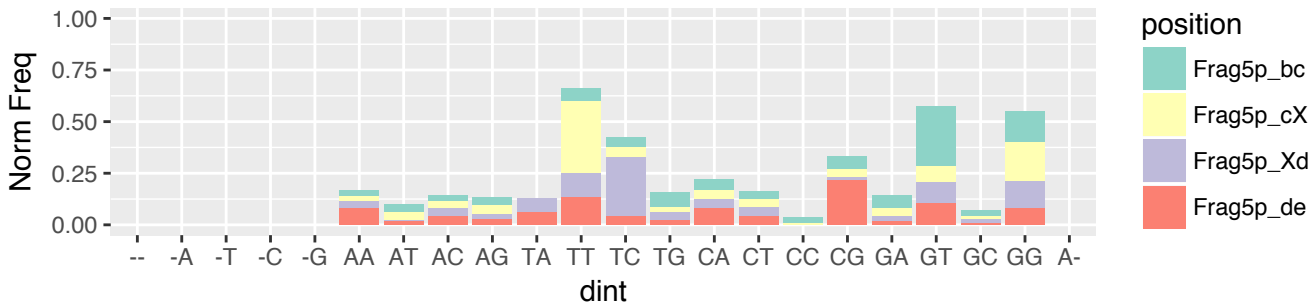

TGCT (n=1095)  
 3'-tRF & exclusive (n=159)  
 5' terminus relative to 5' stem of T-loop (n=111)

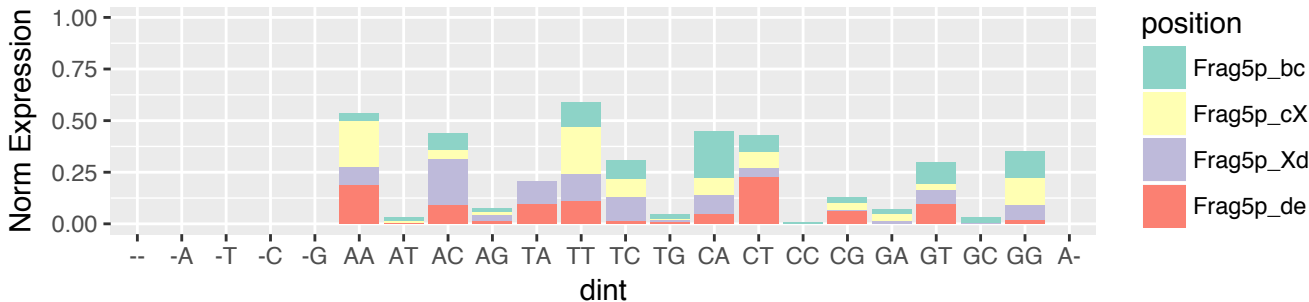

TGCT (n=1095)  
 3'-tRF & exclusive (n=159)  
 5' terminus relative to 3' stem of T-loop (n=48)

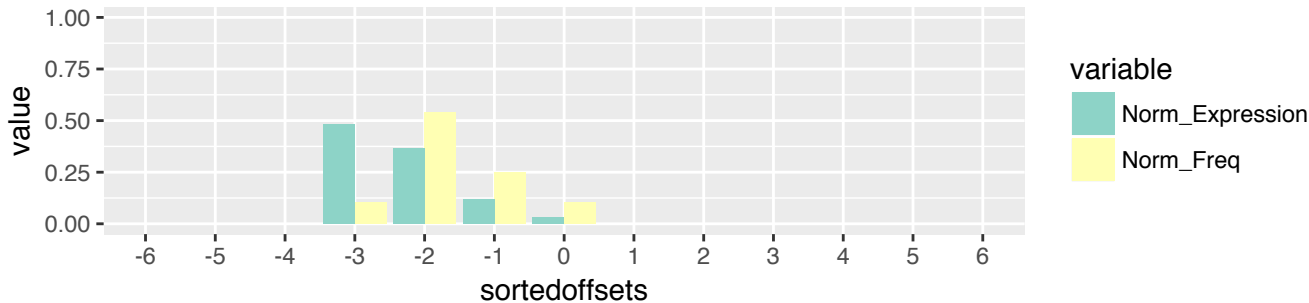

TGCT (n=1095)  
 3'-tRF & exclusive (n=159)  
 5' terminus relative to 3' stem of T-loop (n=48)

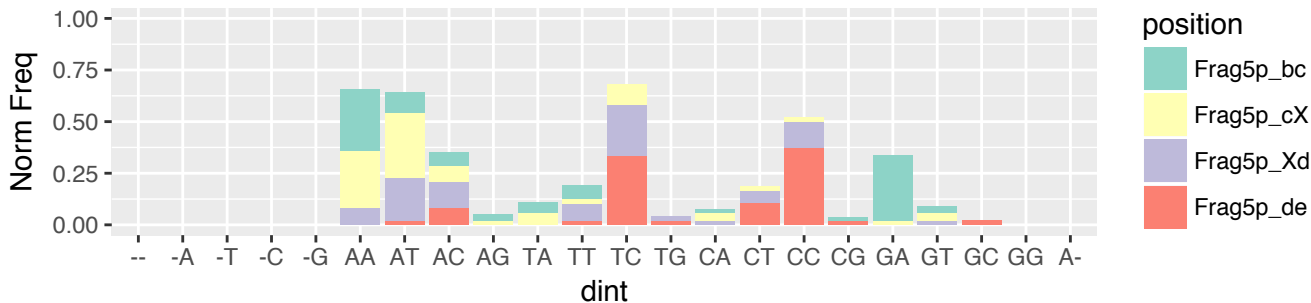

TGCT (n=1095)  
 3'-tRF & exclusive (n=159)  
 5' terminus relative to 3' stem of T-loop (n=48)

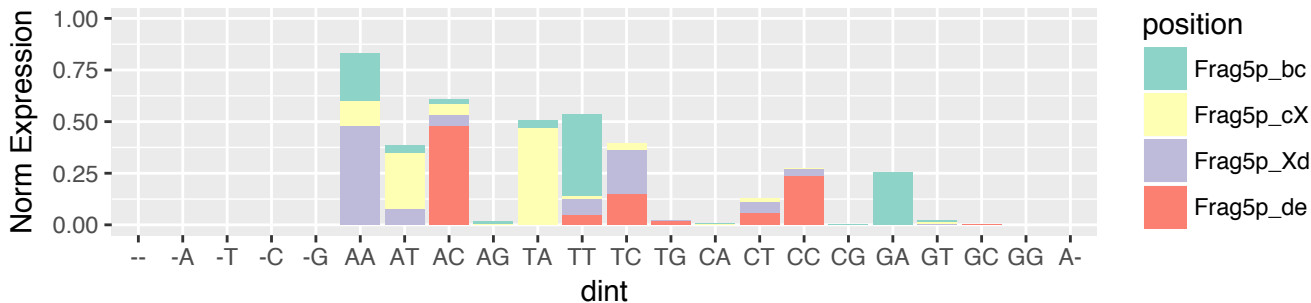

TGCT (n=1095)  
 3'-tRF & exclusive (n=159)  
 3' terminus relative to 3' end of the tRNA (n=159)

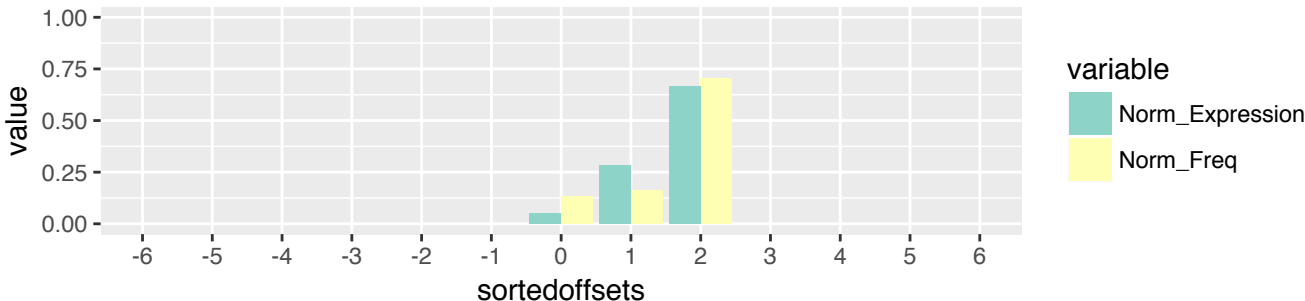

TGCT (n=1095)  
 3'-tRF & exclusive (n=159)  
 3' terminus relative to 3' end of the tRNA (n=159)

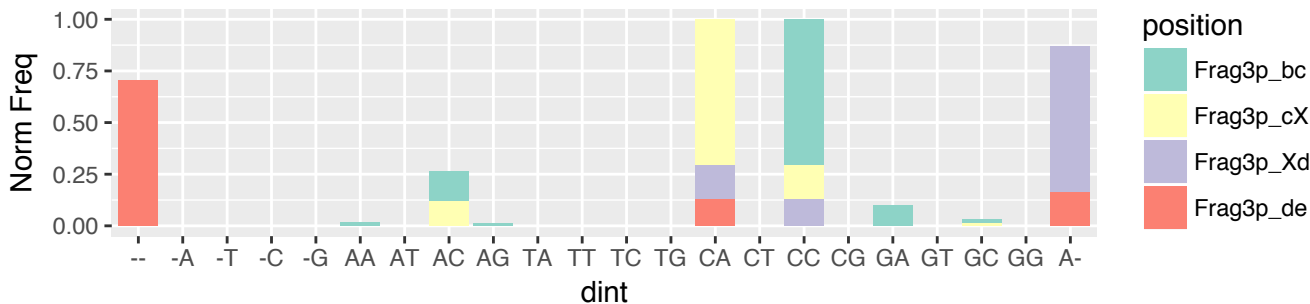

TGCT (n=1095)  
 3'-tRF & exclusive (n=159)  
 3' terminus relative to 3' end of the tRNA (n=159)

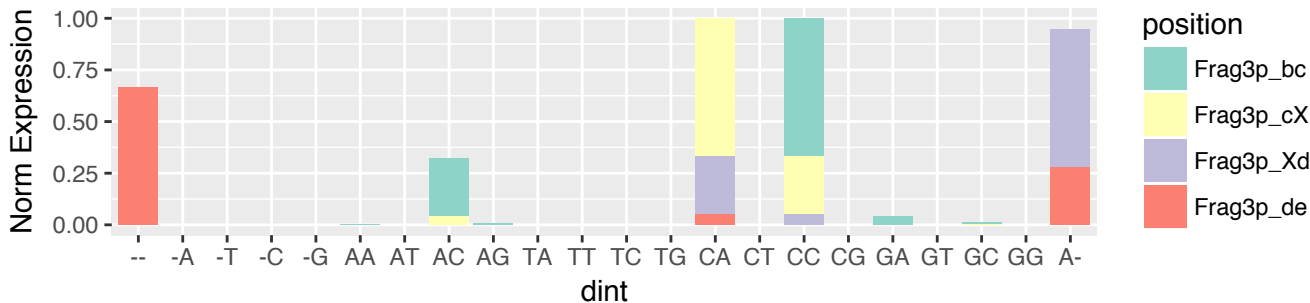

THCA (n=1139)  
 5'-half & exclusive (n=5)  
 5' terminus relative to 5' end of the tRNA (n=5)



THCA (n=1139)  
 5'-half & exclusive (n=5)  
 5' terminus relative to 5' end of the tRNA (n=5)

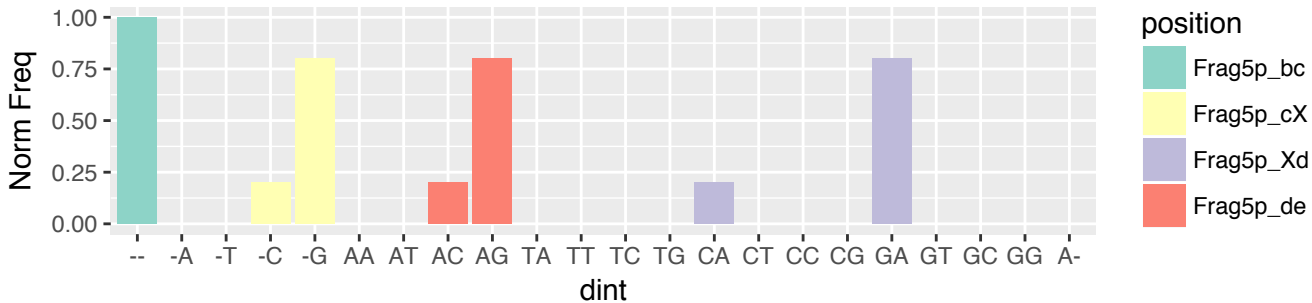

THCA (n=1139)  
 5'-half & exclusive (n=5)  
 5' terminus relative to 5' end of the tRNA (n=5)

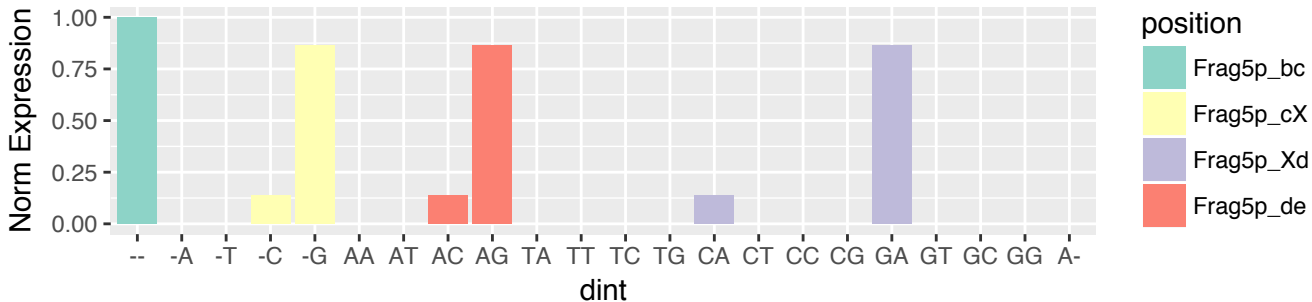

THCA (n=1139)  
 5'-half & exclusive (n=5)  
 3' terminus relative to 5' stem of A-loop (n=5)

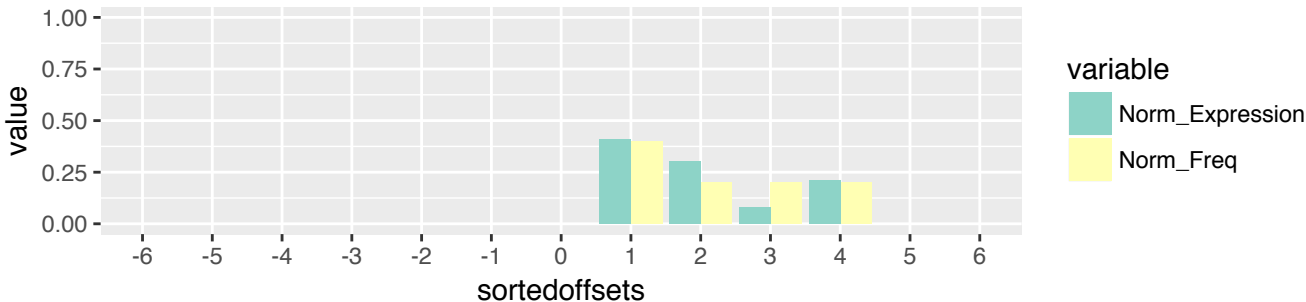

THCA (n=1139)  
 5'-half & exclusive (n=5)  
 3' terminus relative to 5' stem of A-loop (n=5)



THCA (n=1139)  
 5'-half & exclusive (n=5)  
 3' terminus relative to 5' stem of A-loop (n=5)

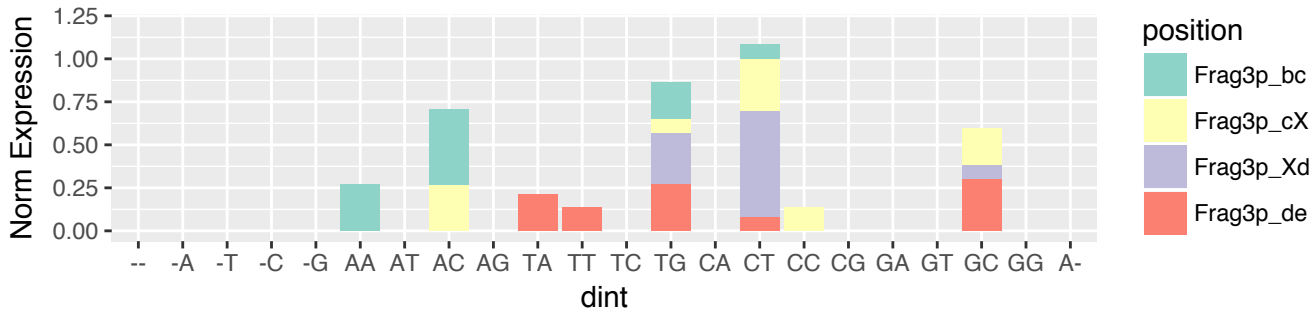

THCA (n=1139)

5'-tRF & exclusive (n=167)

5' terminus relative to 5' end of the tRNA (n=167)

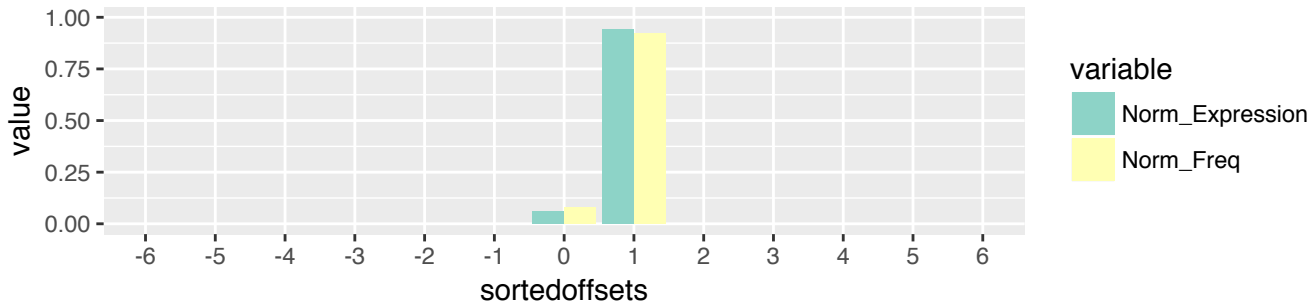

THCA (n=1139)

5'-tRF & exclusive (n=167)

5' terminus relative to 5' end of the tRNA (n=167)

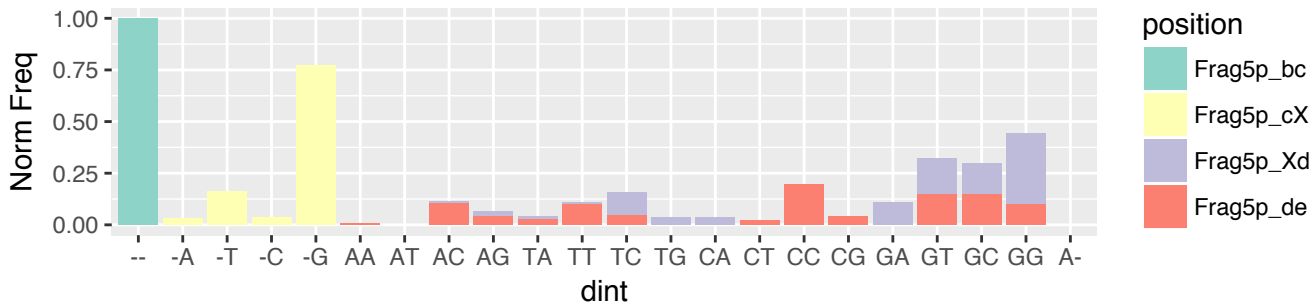

THCA (n=1139)

5'-tRF & exclusive (n=167)

5' terminus relative to 5' end of the tRNA (n=167)

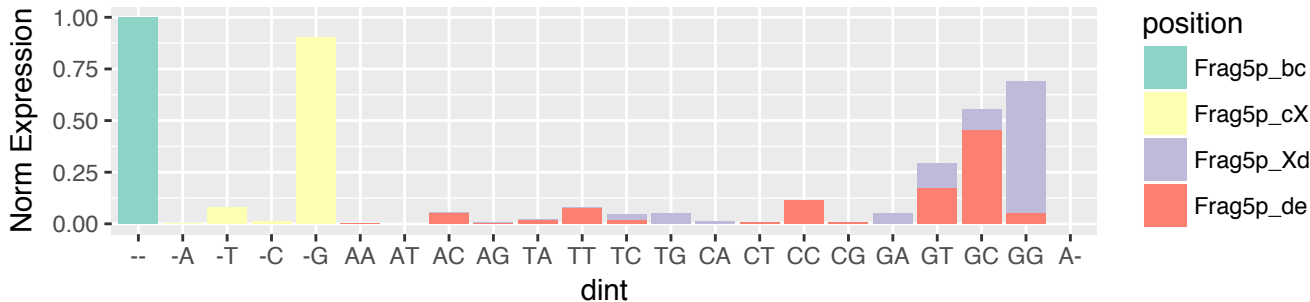



THCA (n=1139)  
 5'-tRF & exclusive (n=167)  
 3' terminus relative to 5' stem of D-loop (n=14)

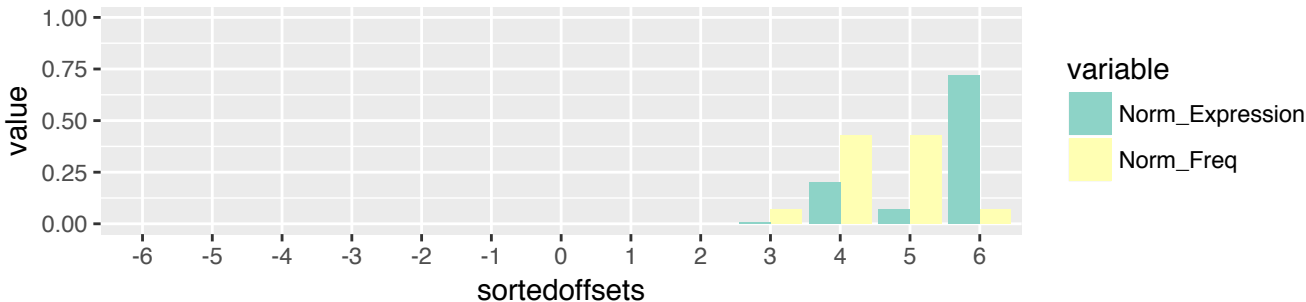

THCA (n=1139)  
 5'-tRF & exclusive (n=167)  
 3' terminus relative to 5' stem of D-loop (n=14)

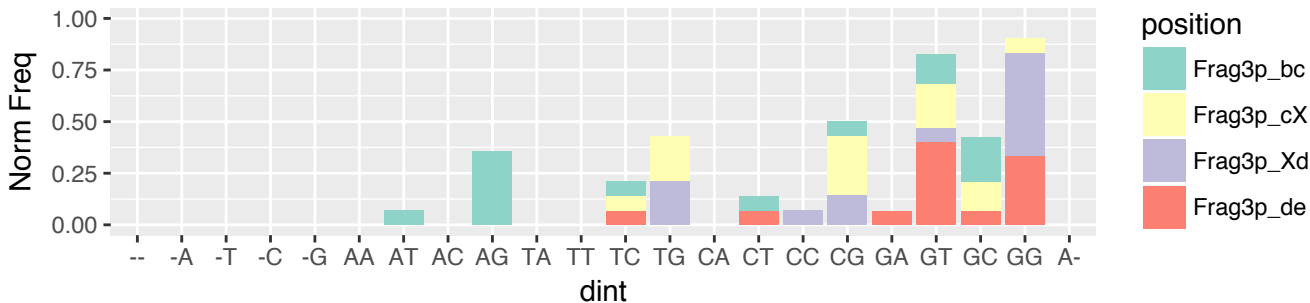

THCA (n=1139)  
 5'-tRF & exclusive (n=167)  
 3' terminus relative to 5' stem of D-loop (n=14)

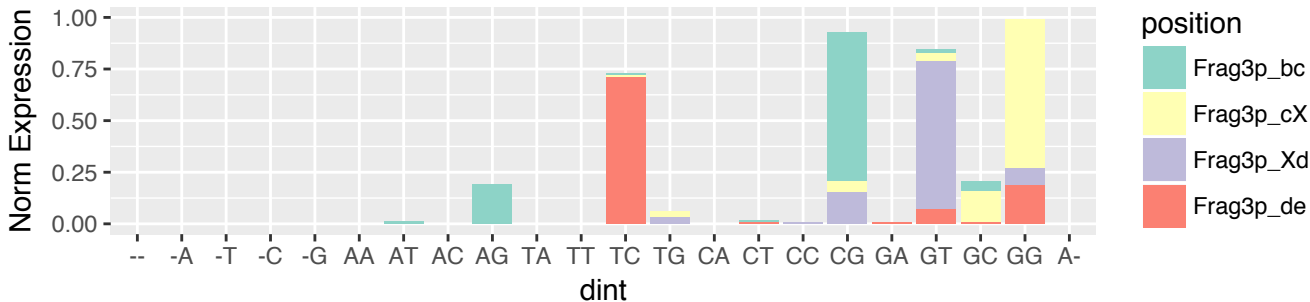

THCA (n=1139)  
 5'-tRF & exclusive (n=167)  
 3' terminus relative to 3' stem of D-loop (n=141)

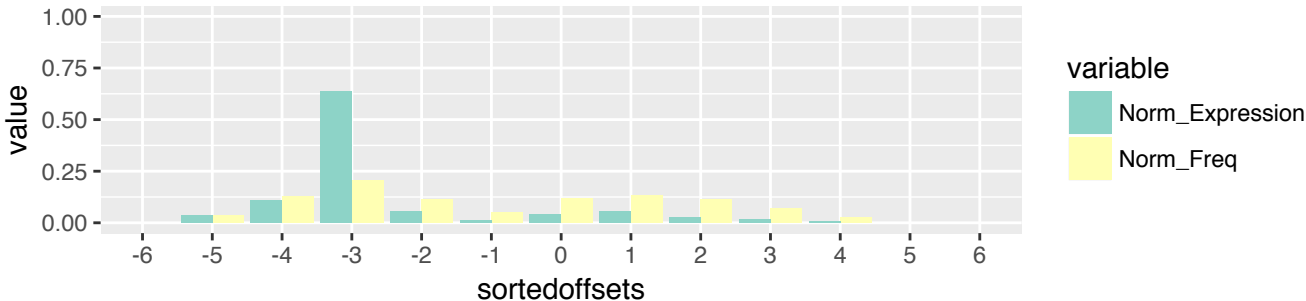

THCA (n=1139)  
 5'-tRF & exclusive (n=167)  
 3' terminus relative to 3' stem of D-loop (n=141)

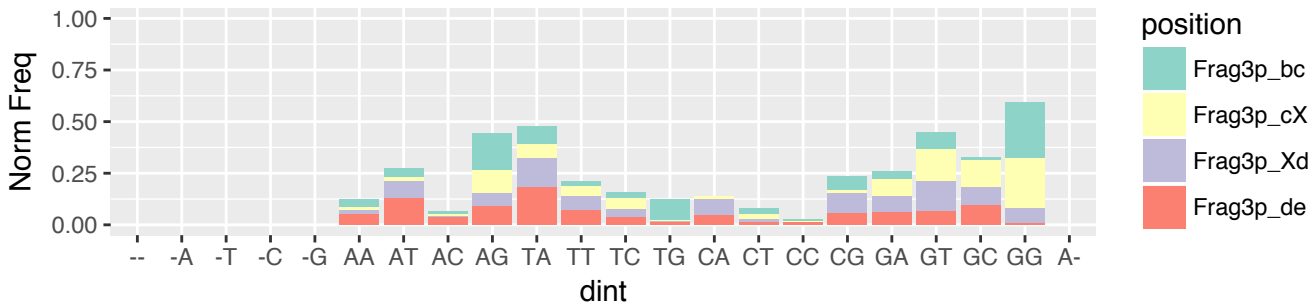

THCA (n=1139)  
 5'-tRF & exclusive (n=167)  
 3' terminus relative to 3' stem of D-loop (n=141)

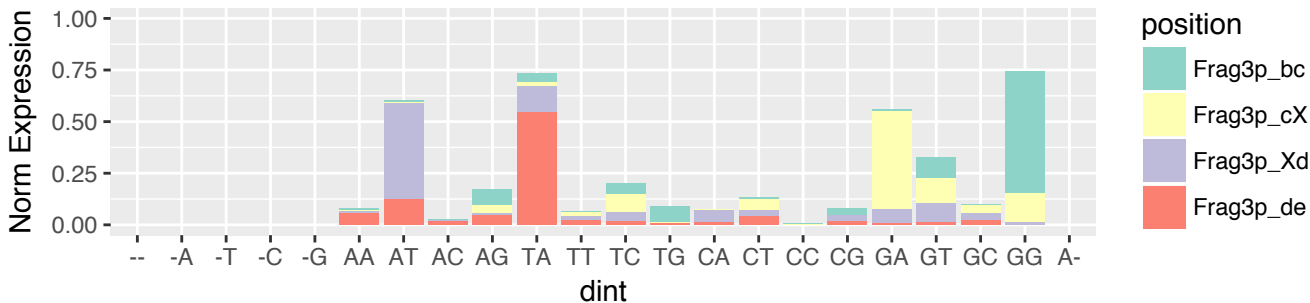

THCA (n=1139)  
 5'-tRF & exclusive (n=167)  
 3' terminus relative to 5' stem of A-loop (n=7)

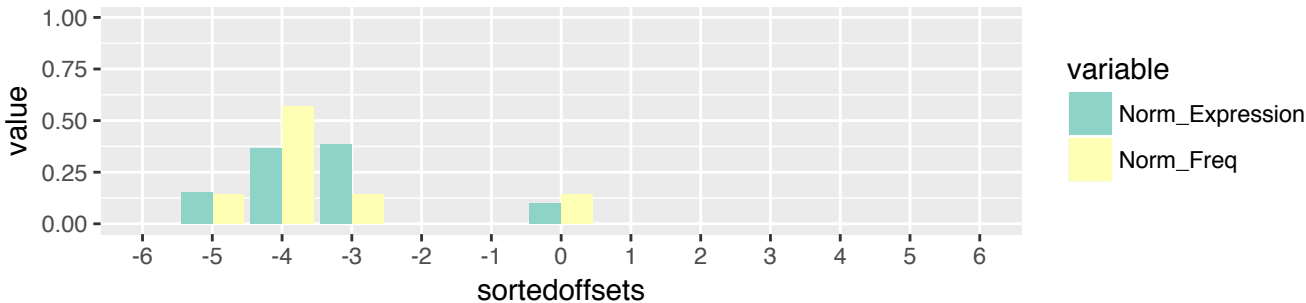

THCA (n=1139)  
 5'-tRF & exclusive (n=167)  
 3' terminus relative to 5' stem of A-loop (n=7)

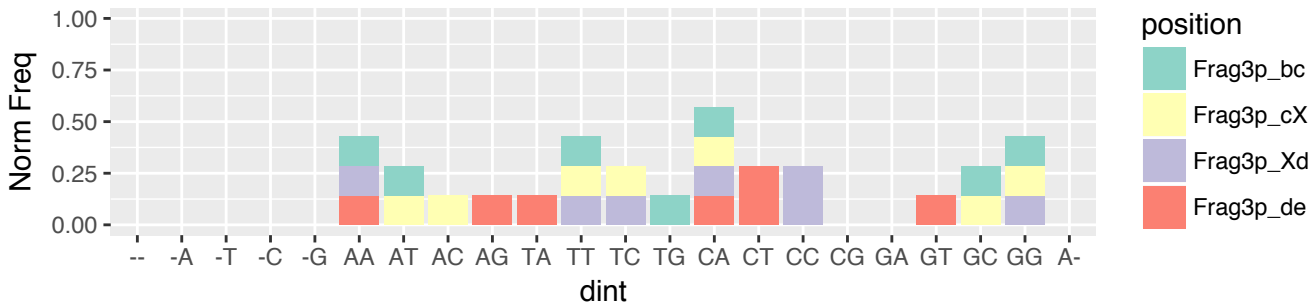

THCA (n=1139)  
 5'-tRF & exclusive (n=167)  
 3' terminus relative to 5' stem of A-loop (n=7)

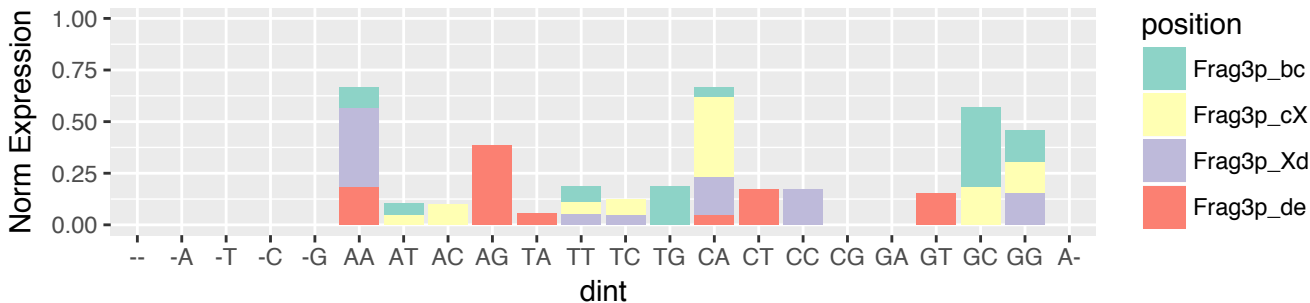

THCA (n=1139)  
 5'-tRF & exclusive (n=167)  
 3' terminus relative to 3' stem of A-loop (n=5)

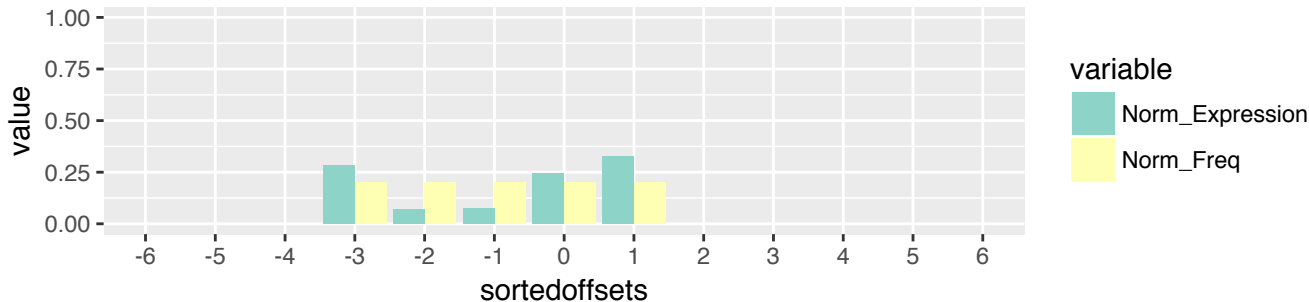

THCA (n=1139)  
 5'-tRF & exclusive (n=167)  
 3' terminus relative to 3' stem of A-loop (n=5)

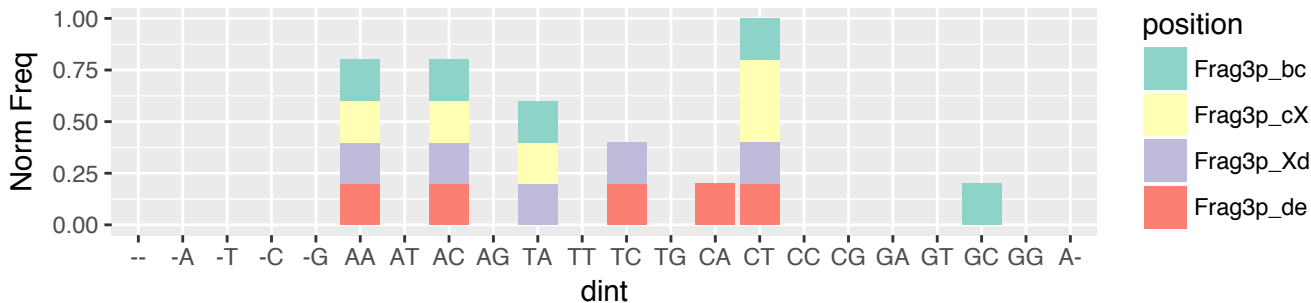

THCA (n=1139)  
 5'-tRF & exclusive (n=167)  
 3' terminus relative to 3' stem of A-loop (n=5)

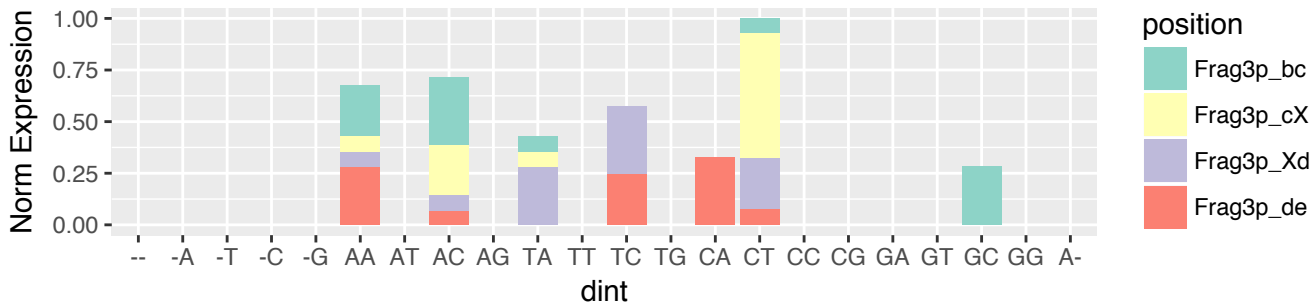

THCA (n=1139)  
 i-tRF & exclusive (n=230)  
 5' terminus relative to 5' end of the tRNA (n=8)

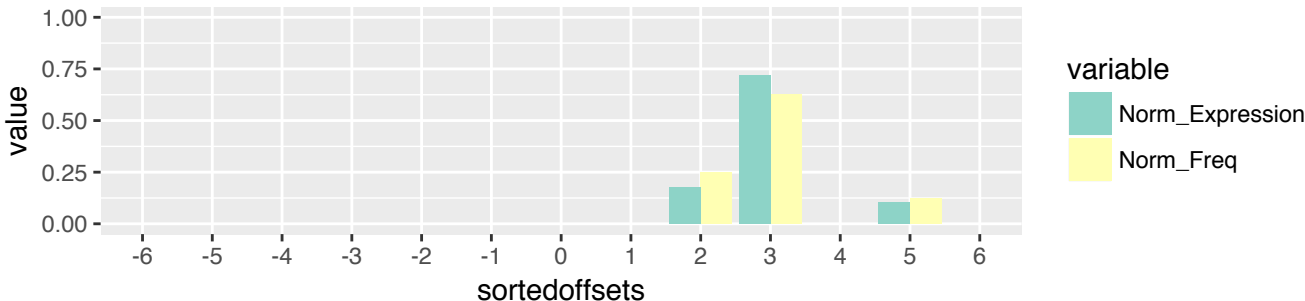

THCA (n=1139)  
 i-tRF & exclusive (n=230)  
 5' terminus relative to 5' end of the tRNA (n=8)

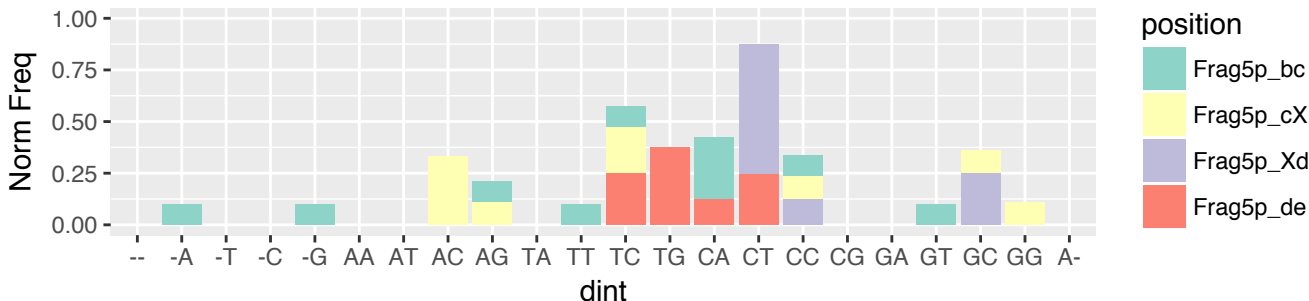

THCA (n=1139)  
 i-tRF & exclusive (n=230)  
 5' terminus relative to 5' end of the tRNA (n=8)

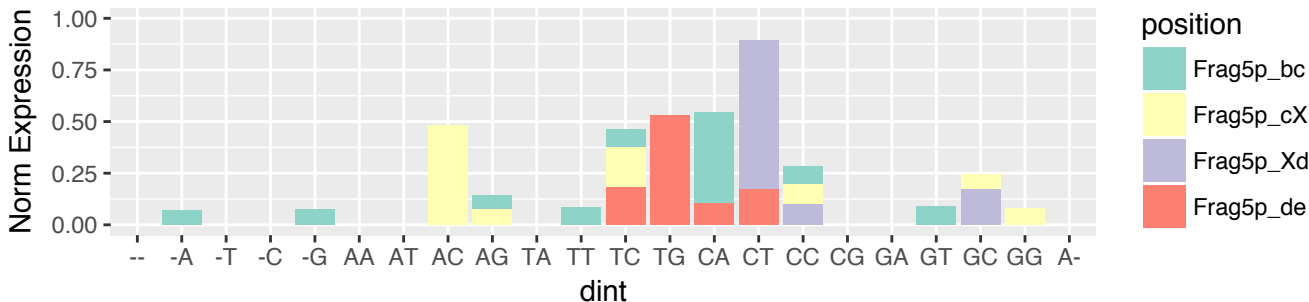

THCA (n=1139)  
 i-tRF & exclusive (n=230)  
 5' terminus relative to 5' stem of D-loop (n=70)

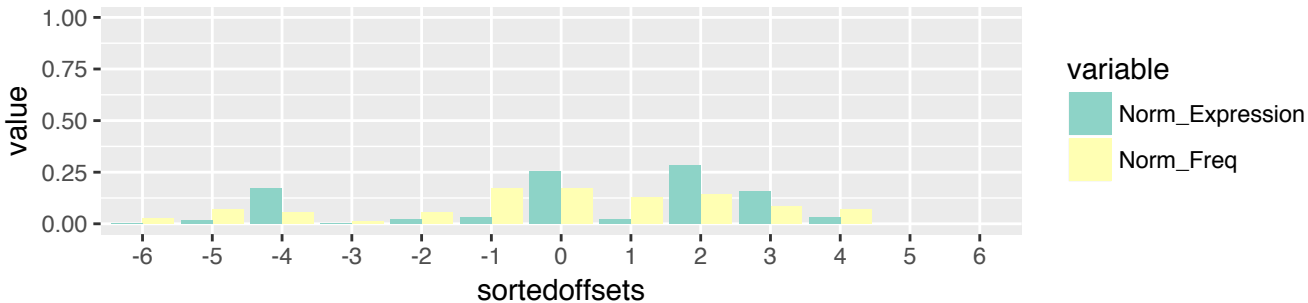

THCA (n=1139)  
 i-tRF & exclusive (n=230)  
 5' terminus relative to 5' stem of D-loop (n=70)

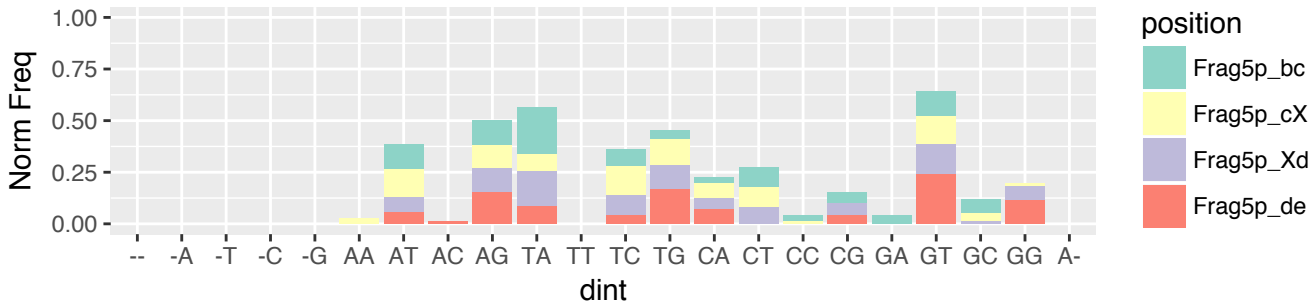

THCA (n=1139)  
 i-tRF & exclusive (n=230)  
 5' terminus relative to 5' stem of D-loop (n=70)

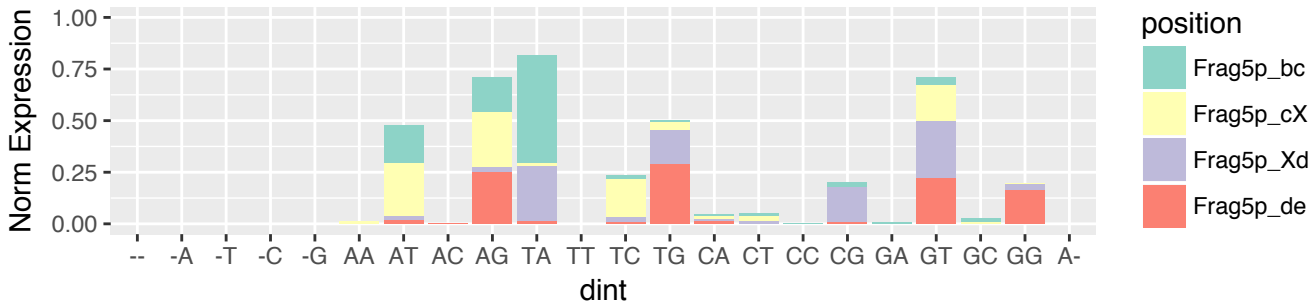

THCA (n=1139)  
 i-tRF & exclusive (n=230)  
 5' terminus relative to 3' stem of D-loop (n=7)

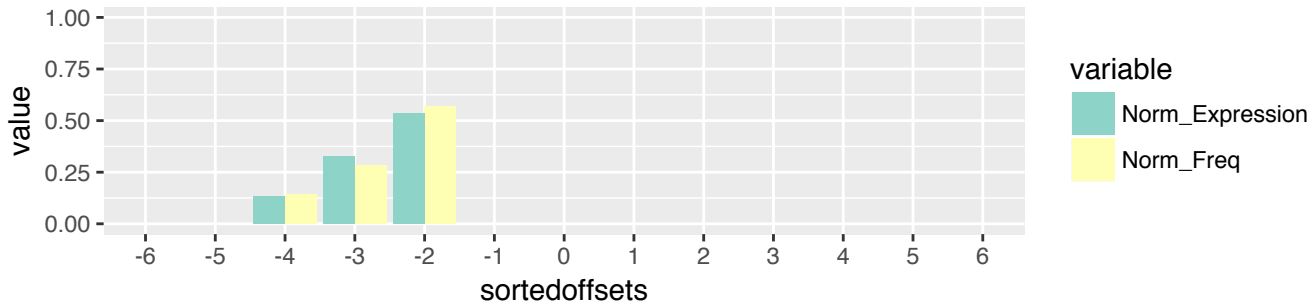

THCA (n=1139)  
 i-tRF & exclusive (n=230)  
 5' terminus relative to 3' stem of D-loop (n=7)

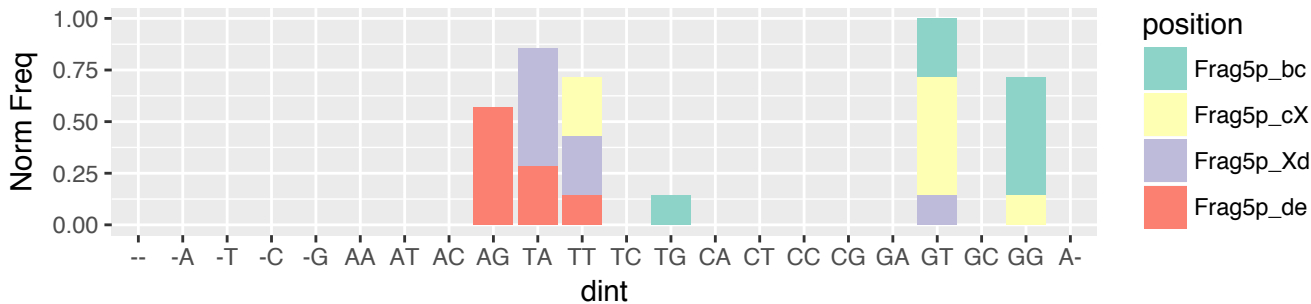

THCA (n=1139)  
 i-tRF & exclusive (n=230)  
 5' terminus relative to 3' stem of D-loop (n=7)

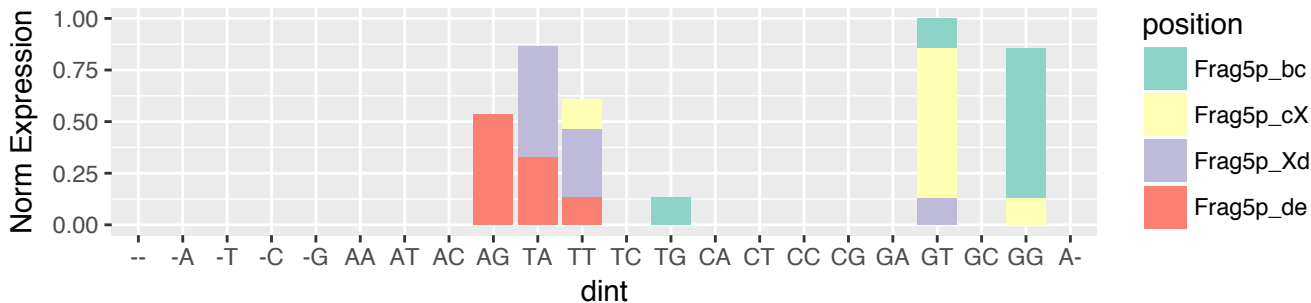

THCA (n=1139)  
 i-tRF & exclusive (n=230)  
 5' terminus relative to 5' stem of A-loop (n=43)

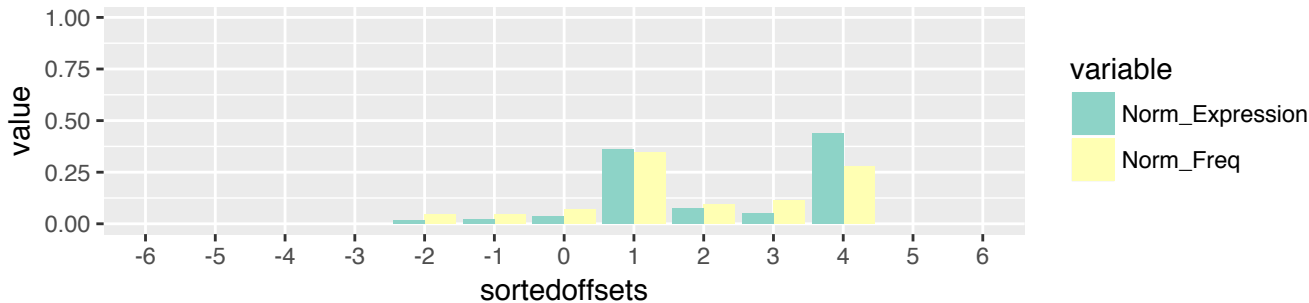

THCA (n=1139)  
 i-tRF & exclusive (n=230)  
 5' terminus relative to 5' stem of A-loop (n=43)

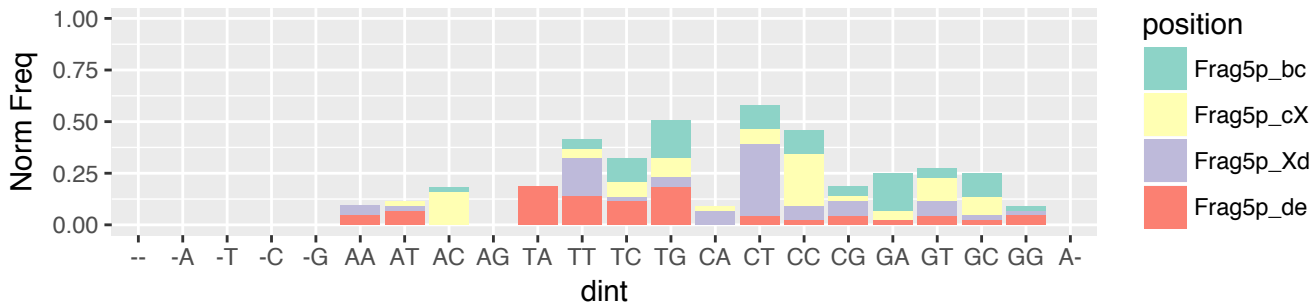

THCA (n=1139)  
 i-tRF & exclusive (n=230)  
 5' terminus relative to 5' stem of A-loop (n=43)

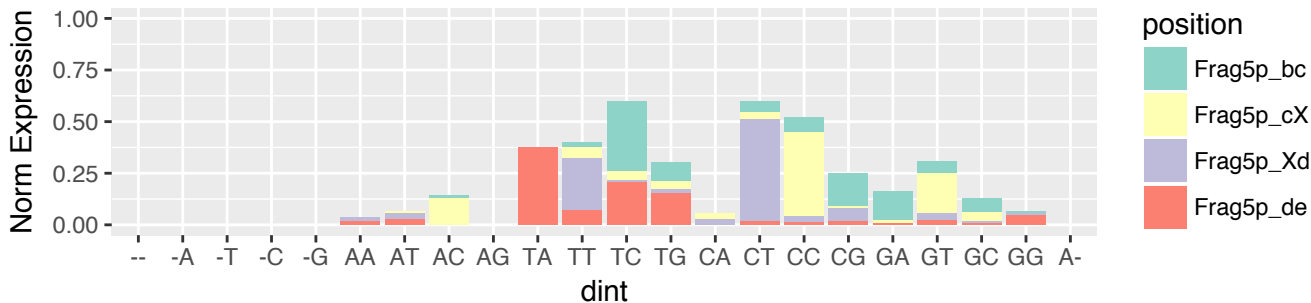



THCA (n=1139)  
i-tRF & exclusive (n=230)  
5' terminus relative to 3' stem of A-loop (n=70)

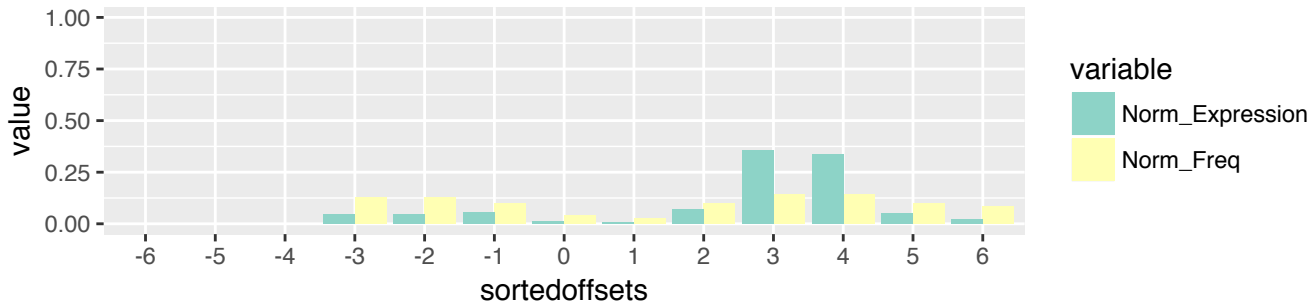

THCA (n=1139)  
i-tRF & exclusive (n=230)  
5' terminus relative to 3' stem of A-loop (n=70)

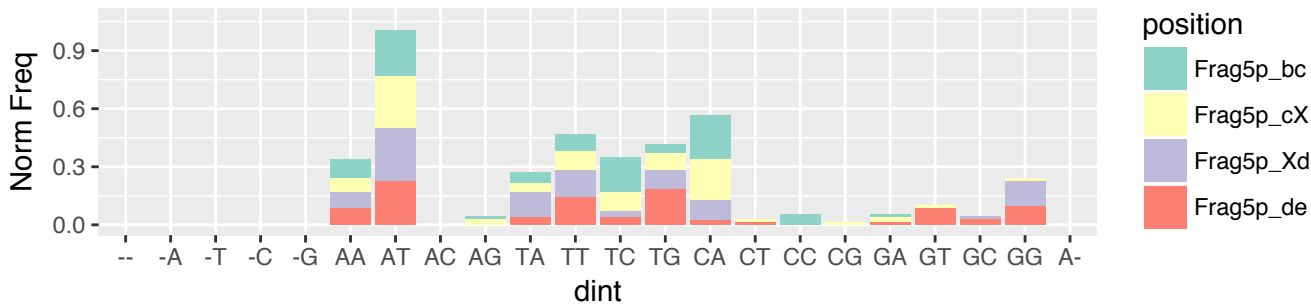

THCA (n=1139)  
i-tRF & exclusive (n=230)  
5' terminus relative to 3' stem of A-loop (n=70)

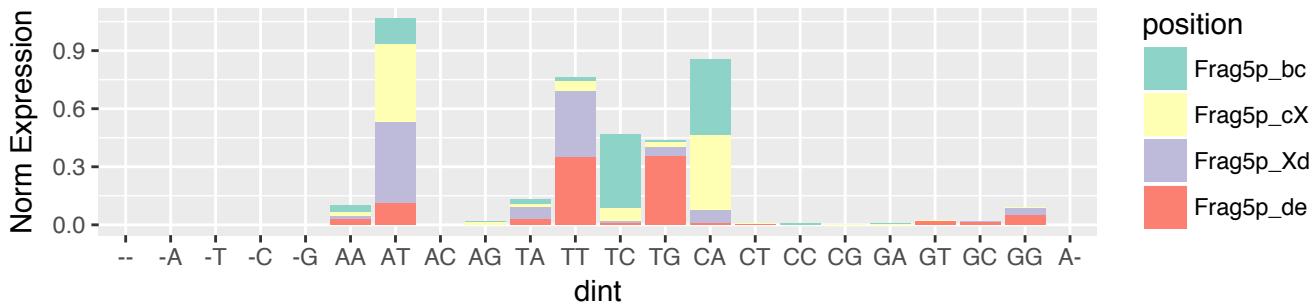

THCA (n=1139)  
 i-tRF & exclusive (n=230)  
 5' terminus relative to 5' stem of T-loop (n=32)

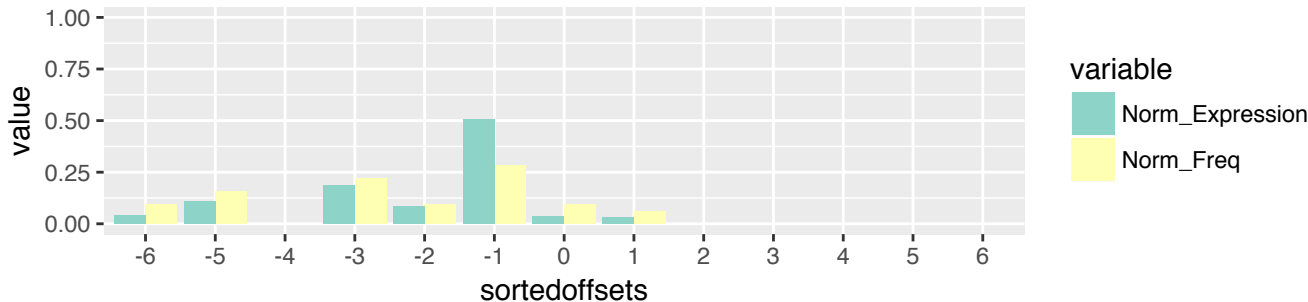

THCA (n=1139)  
 i-tRF & exclusive (n=230)  
 5' terminus relative to 5' stem of T-loop (n=32)

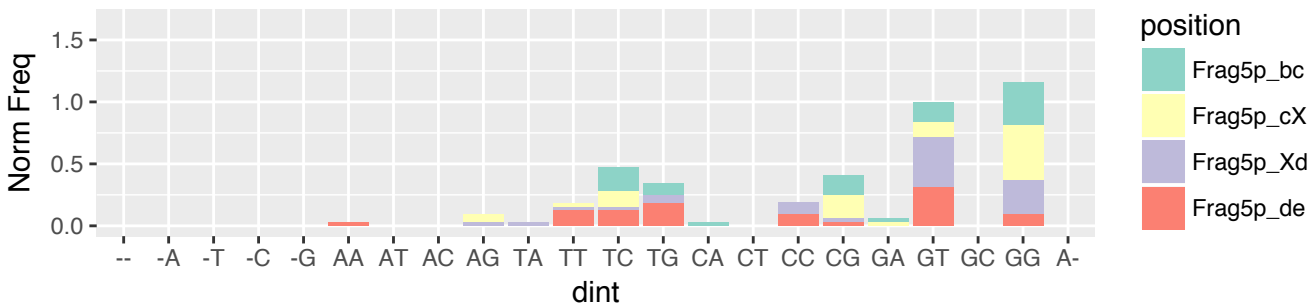

THCA (n=1139)  
 i-tRF & exclusive (n=230)  
 5' terminus relative to 5' stem of T-loop (n=32)

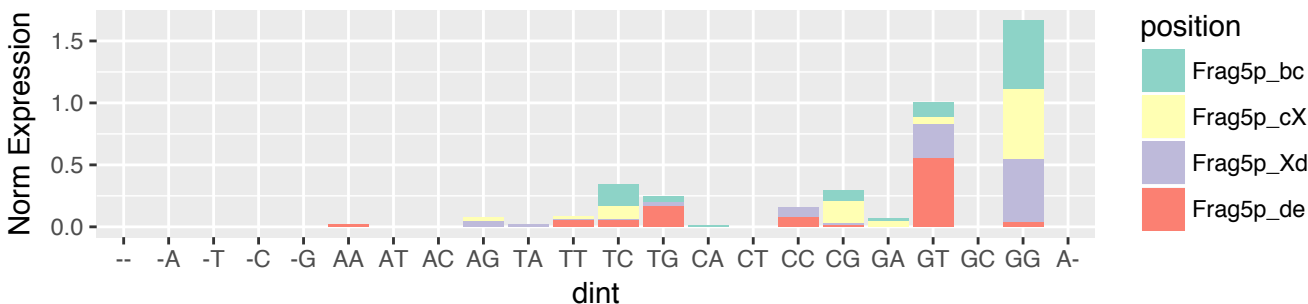

THCA (n=1139)  
 i-tRF & exclusive (n=230)  
 3' terminus relative to 3' stem of D-loop (n=4)

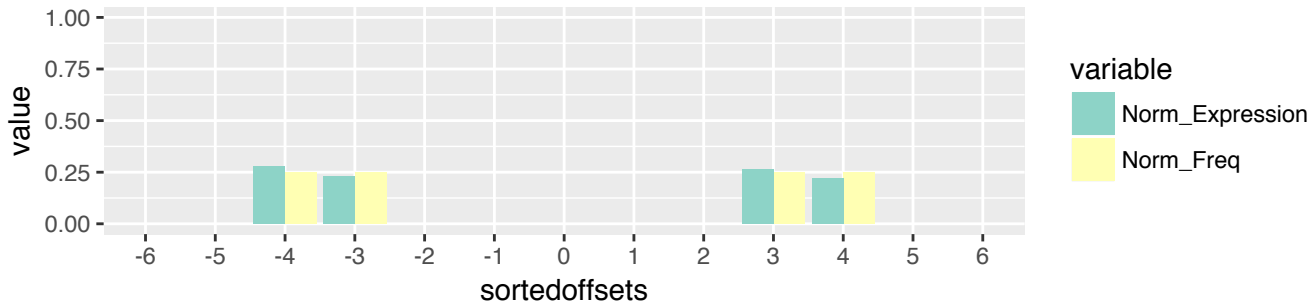

THCA (n=1139)  
 i-tRF & exclusive (n=230)  
 3' terminus relative to 3' stem of D-loop (n=4)

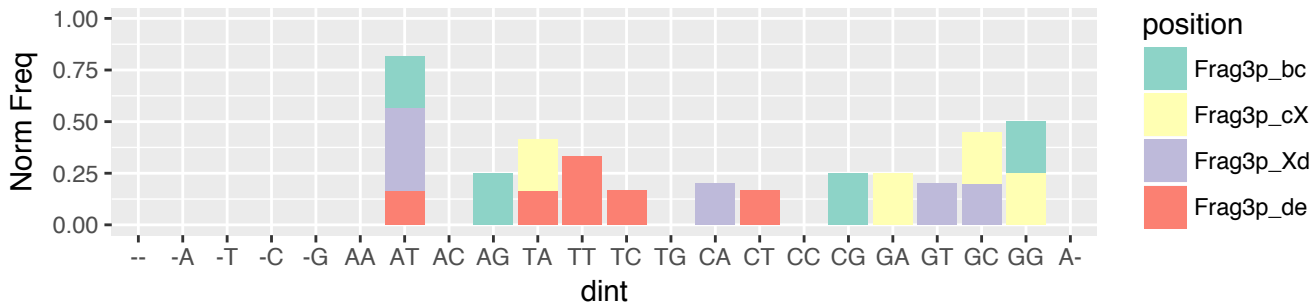

THCA (n=1139)  
 i-tRF & exclusive (n=230)  
 3' terminus relative to 3' stem of D-loop (n=4)

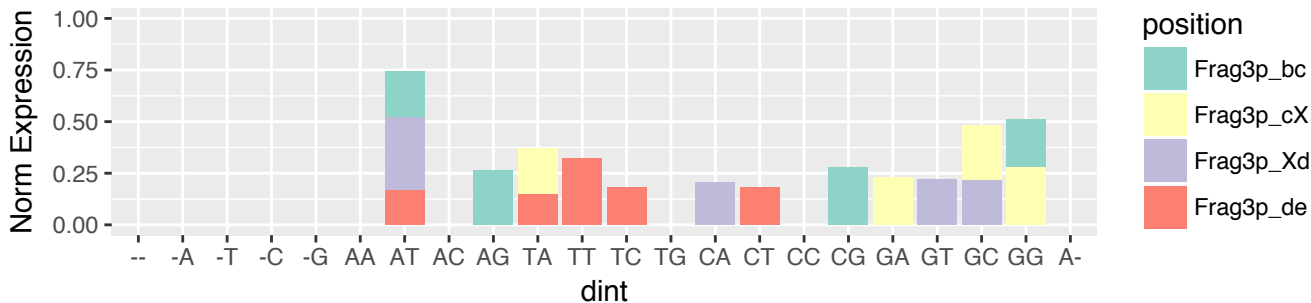

THCA (n=1139)  
i-tRF & exclusive (n=230)  
3' terminus relative to 5' stem of A-loop (n=70)

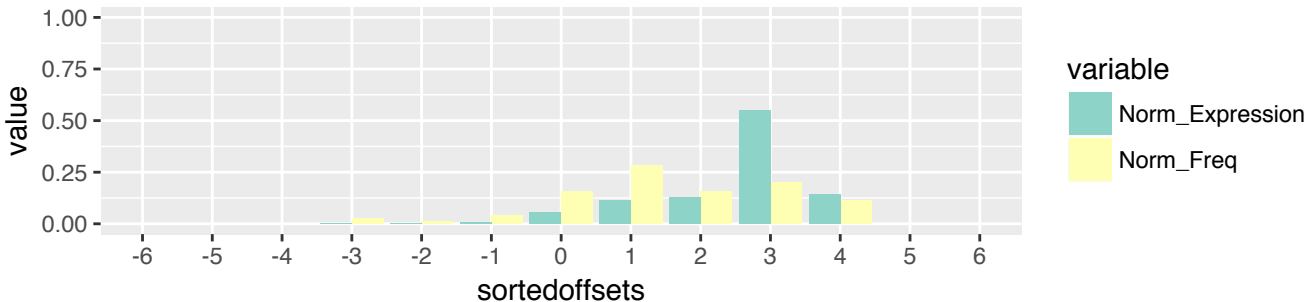

THCA (n=1139)  
i-tRF & exclusive (n=230)  
3' terminus relative to 5' stem of A-loop (n=70)

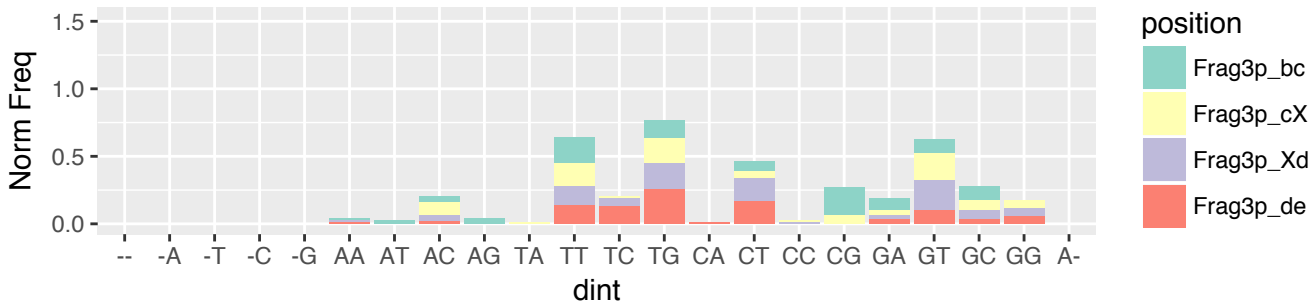

THCA (n=1139)  
i-tRF & exclusive (n=230)  
3' terminus relative to 5' stem of A-loop (n=70)

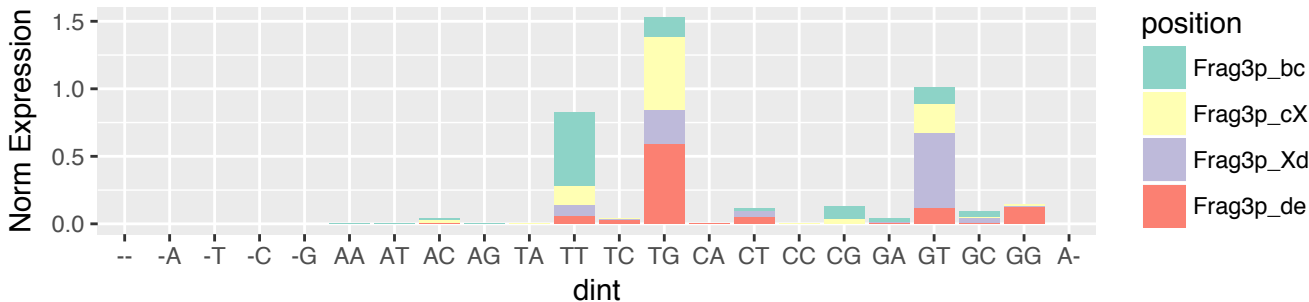

THCA (n=1139)  
 i-tRF & exclusive (n=230)  
 3' terminus relative to 3' stem of A-loop (n=17)

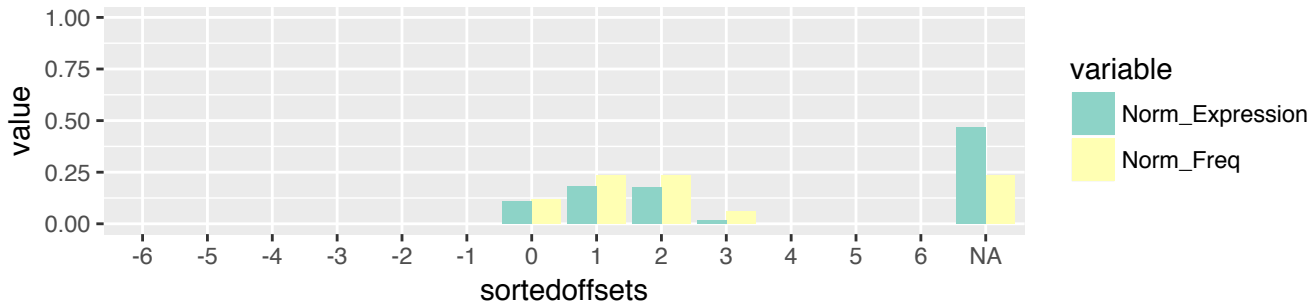

THCA (n=1139)  
 i-tRF & exclusive (n=230)  
 3' terminus relative to 3' stem of A-loop (n=17)

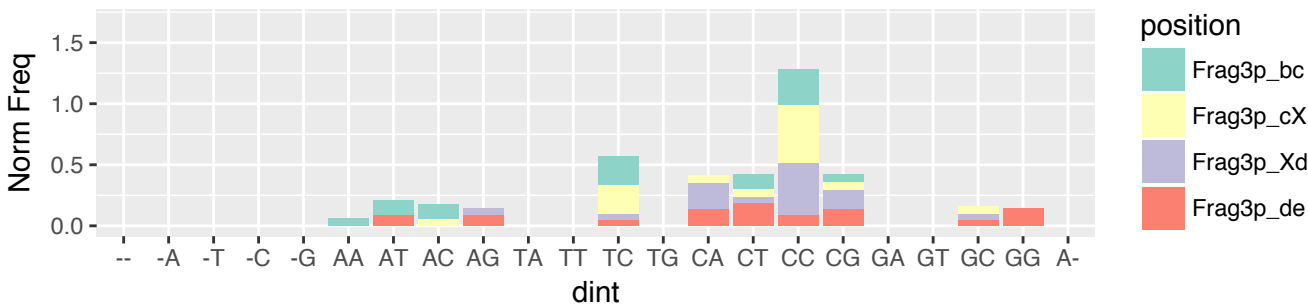

THCA (n=1139)  
 i-tRF & exclusive (n=230)  
 3' terminus relative to 3' stem of A-loop (n=17)

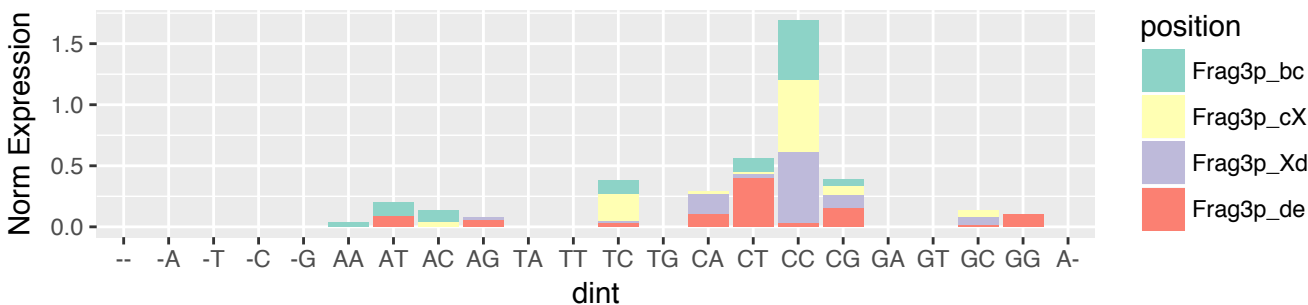

THCA (n=1139)  
 i-tRF & exclusive (n=230)  
 3' terminus relative to 5' stem of T-loop (n=49)

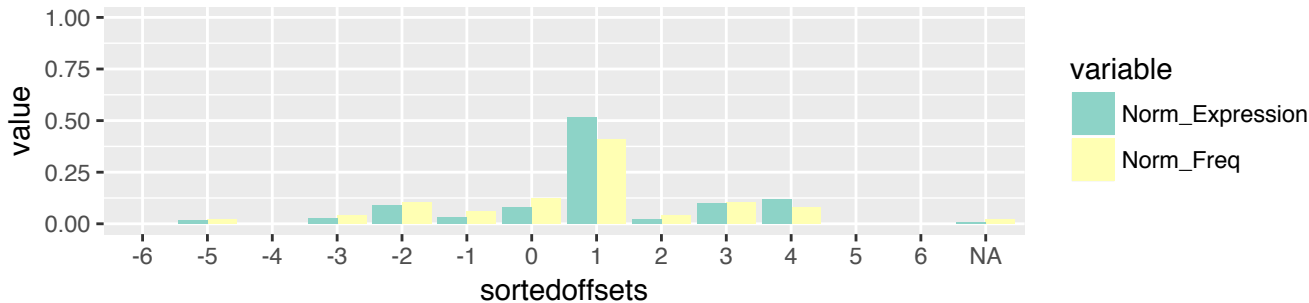

THCA (n=1139)  
 i-tRF & exclusive (n=230)  
 3' terminus relative to 5' stem of T-loop (n=49)

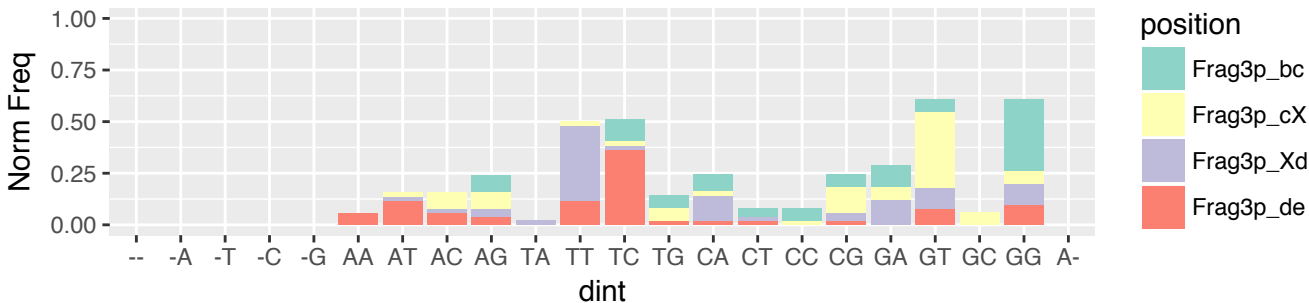

THCA (n=1139)  
 i-tRF & exclusive (n=230)  
 3' terminus relative to 5' stem of T-loop (n=49)

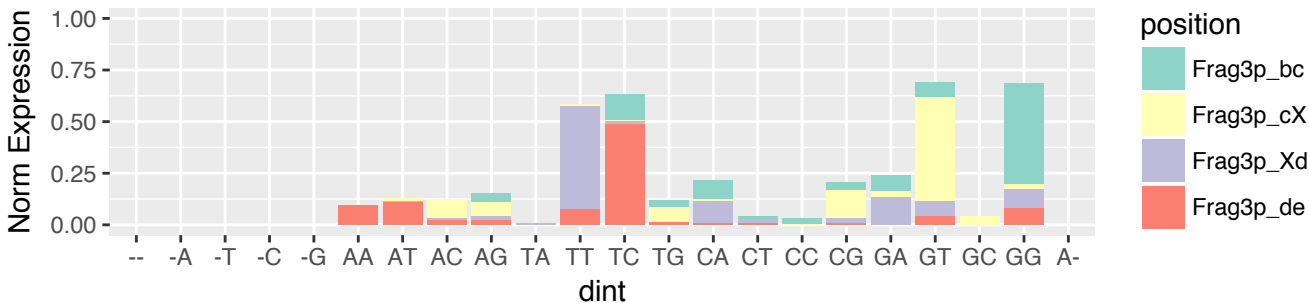

THCA (n=1139)  
i-tRF & exclusive (n=230)  
3' terminus relative to 3' stem of T-loop (n=54)

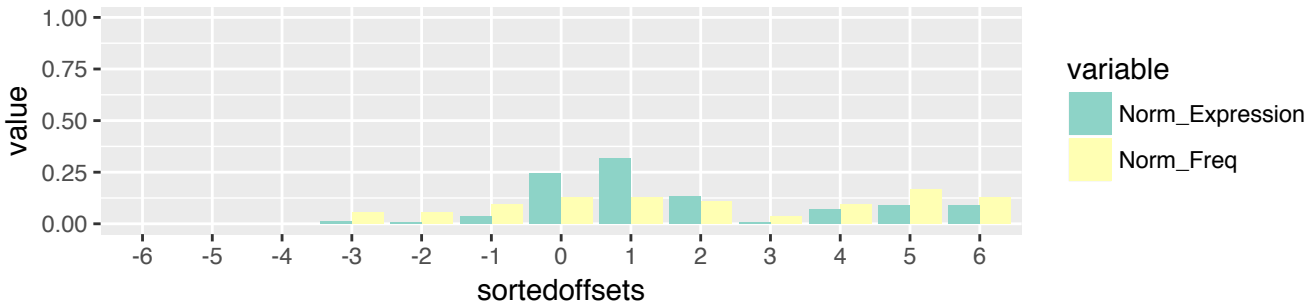

THCA (n=1139)  
i-tRF & exclusive (n=230)  
3' terminus relative to 3' stem of T-loop (n=54)

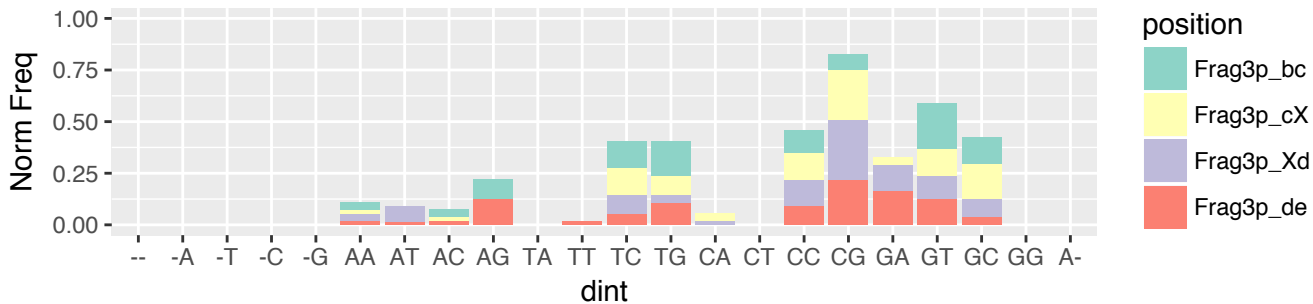

THCA (n=1139)  
i-tRF & exclusive (n=230)  
3' terminus relative to 3' stem of T-loop (n=54)

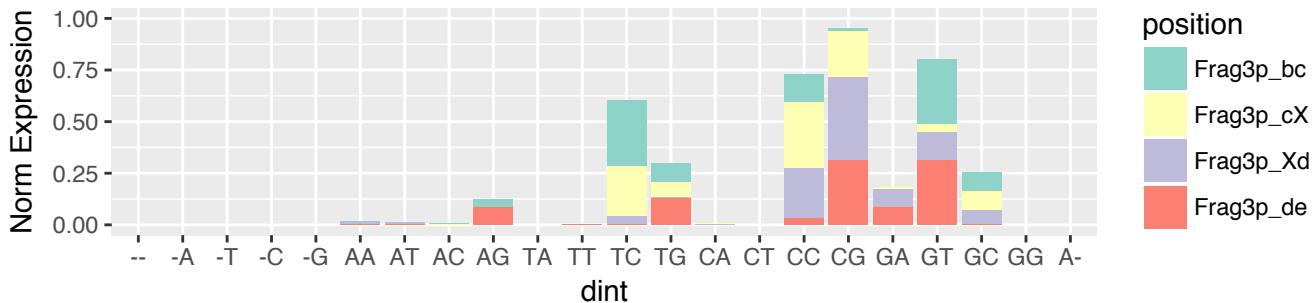

THCA (n=1139)  
 i-tRF & exclusive (n=230)  
 3' terminus relative to 3' end of the tRNA (n=36)

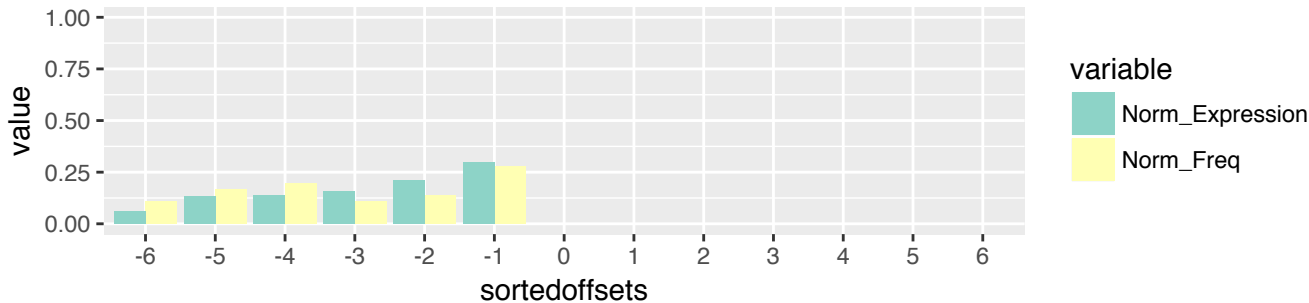

THCA (n=1139)  
 i-tRF & exclusive (n=230)  
 3' terminus relative to 3' end of the tRNA (n=36)

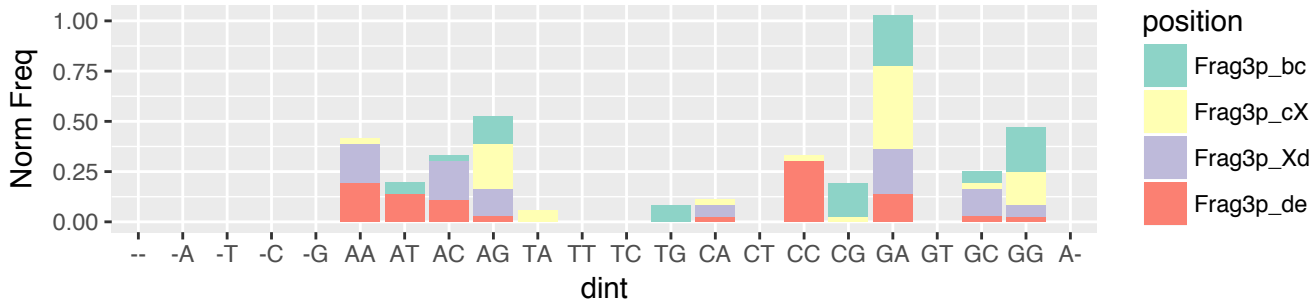

THCA (n=1139)  
 i-tRF & exclusive (n=230)  
 3' terminus relative to 3' end of the tRNA (n=36)

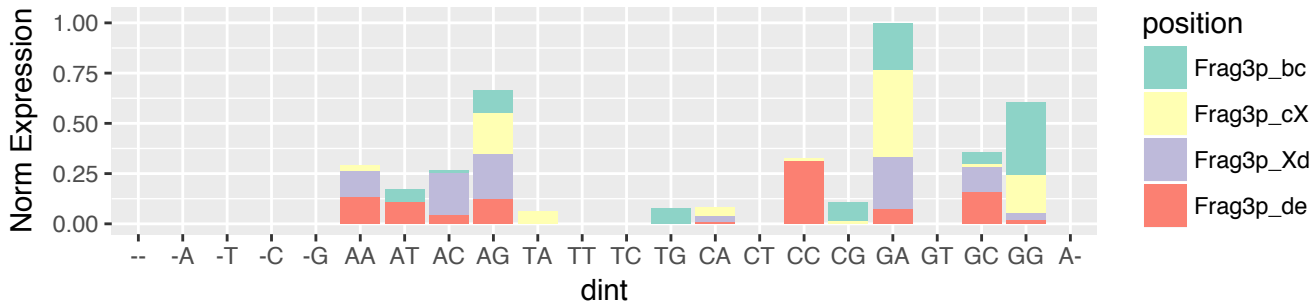



THCA (n=1139)  
 3'-tRF & exclusive (n=198)  
 5' terminus relative to 5' stem of T-loop (n=127)

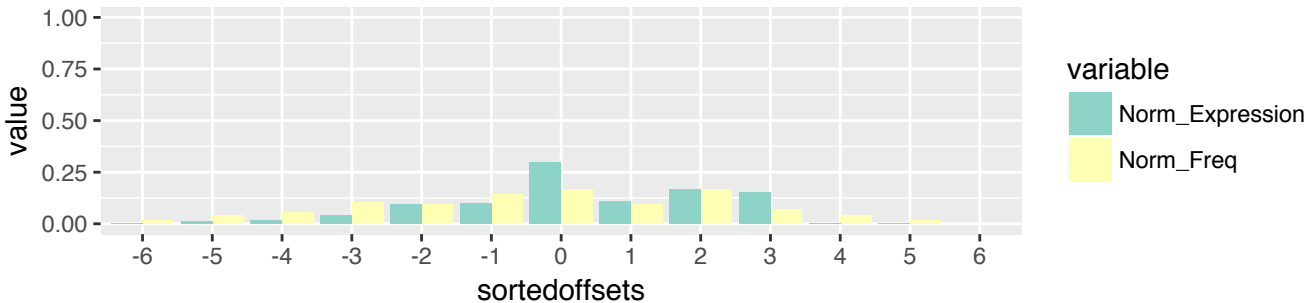

THCA (n=1139)  
 3'-tRF & exclusive (n=198)  
 5' terminus relative to 5' stem of T-loop (n=127)

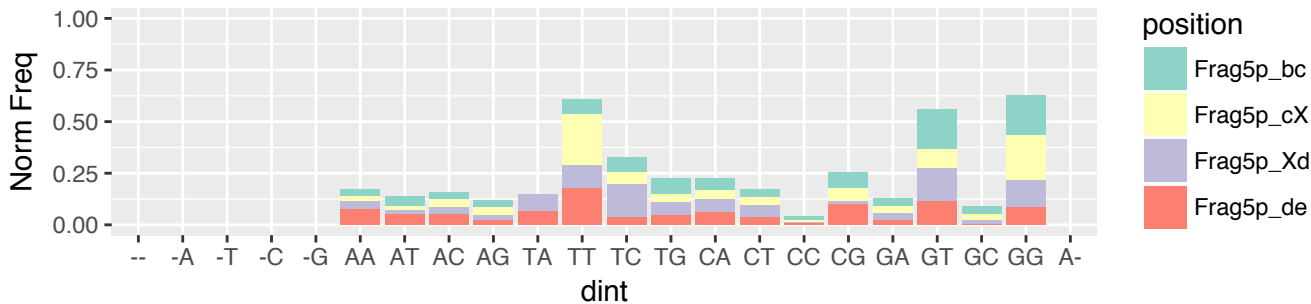

THCA (n=1139)  
 3'-tRF & exclusive (n=198)  
 5' terminus relative to 5' stem of T-loop (n=127)

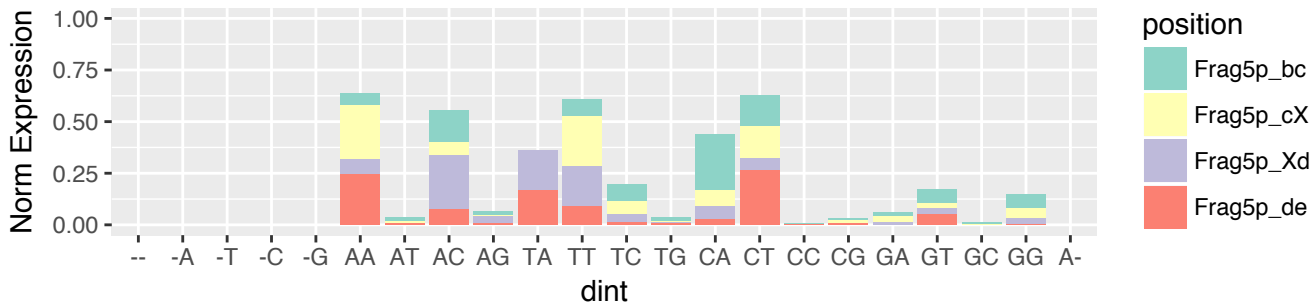

THCA (n=1139)  
 3'-tRF & exclusive (n=198)  
 5' terminus relative to 3' stem of T-loop (n=71)

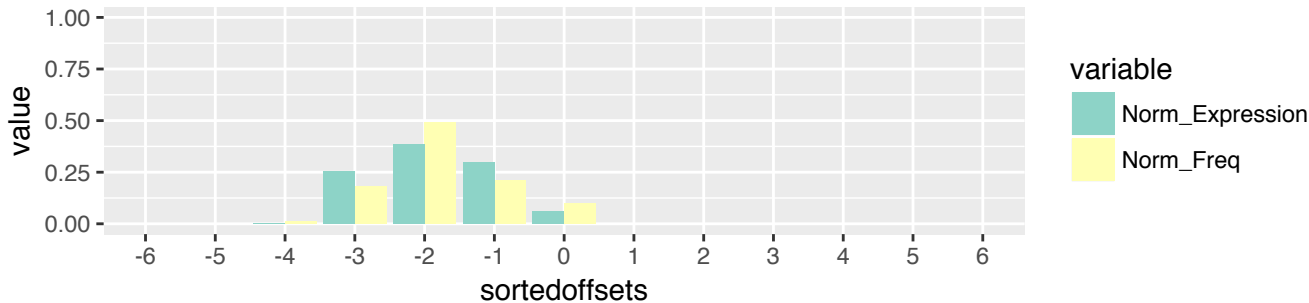

THCA (n=1139)  
 3'-tRF & exclusive (n=198)  
 5' terminus relative to 3' stem of T-loop (n=71)

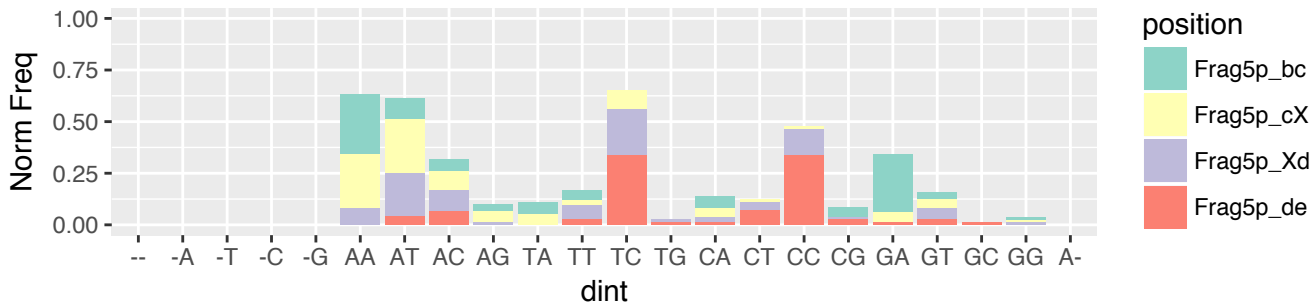

THCA (n=1139)  
 3'-tRF & exclusive (n=198)  
 5' terminus relative to 3' stem of T-loop (n=71)

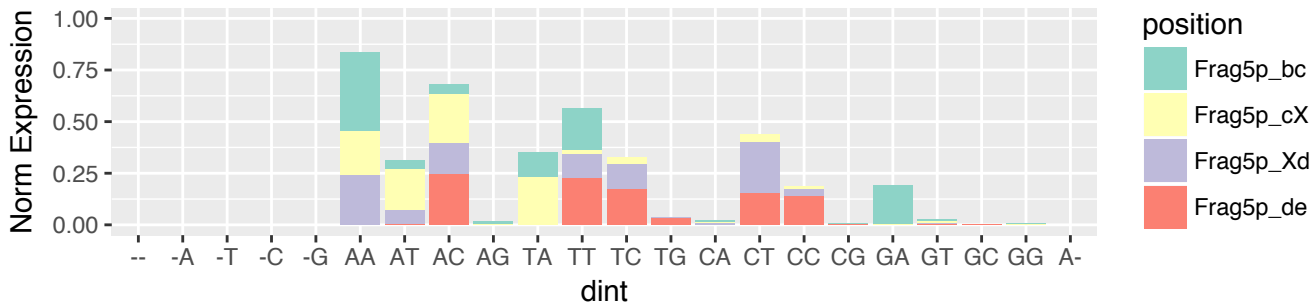

THCA (n=1139)  
 3'-tRF & exclusive (n=198)  
 3' terminus relative to 3' end of the tRNA (n=198)

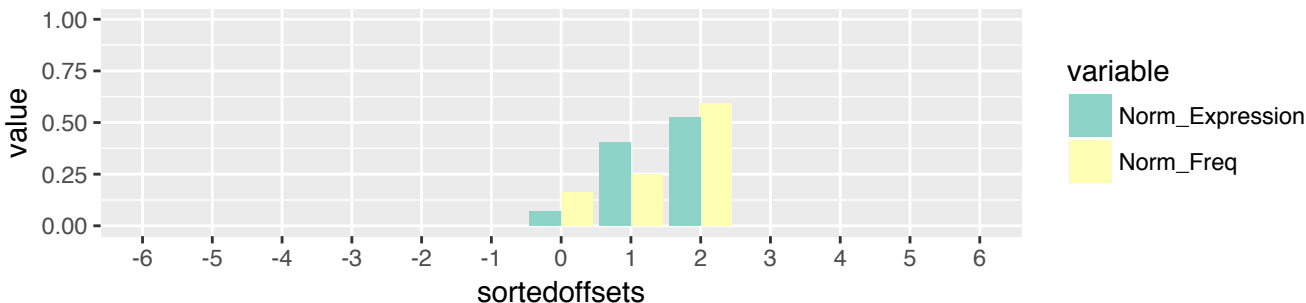

THCA (n=1139)  
 3'-tRF & exclusive (n=198)  
 3' terminus relative to 3' end of the tRNA (n=198)

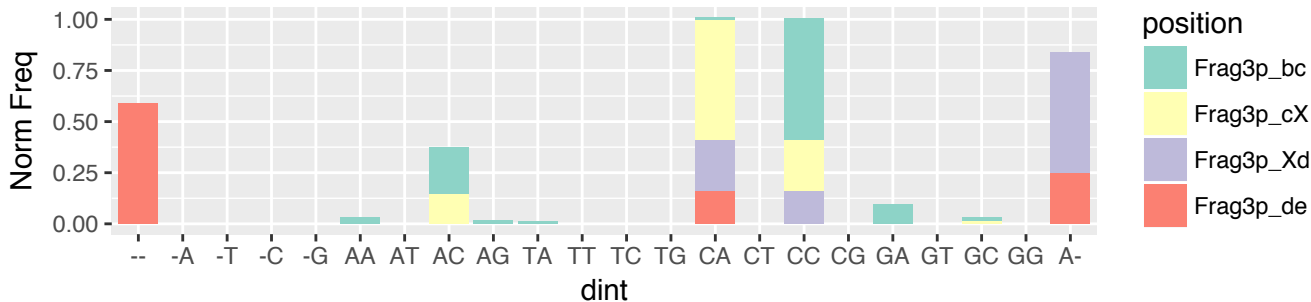

THCA (n=1139)  
 3'-tRF & exclusive (n=198)  
 3' terminus relative to 3' end of the tRNA (n=198)

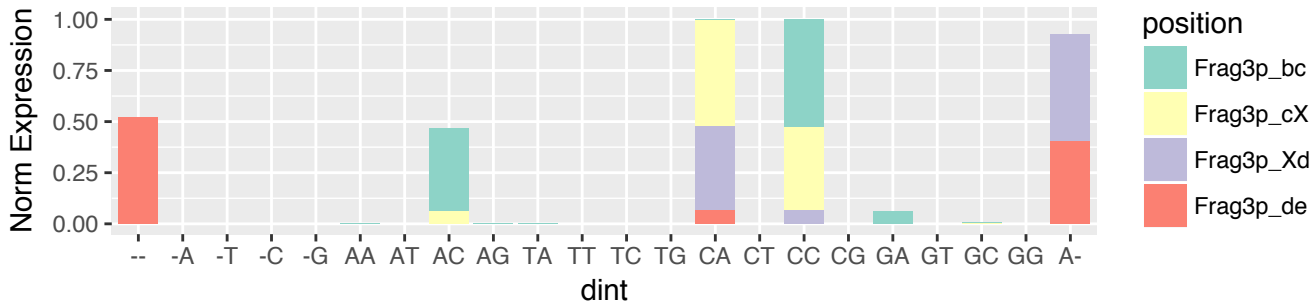

THYM (n=783)  
5'-half & exclusive (n=5)  
5' terminus relative to 5' end of the tRNA (n=5)

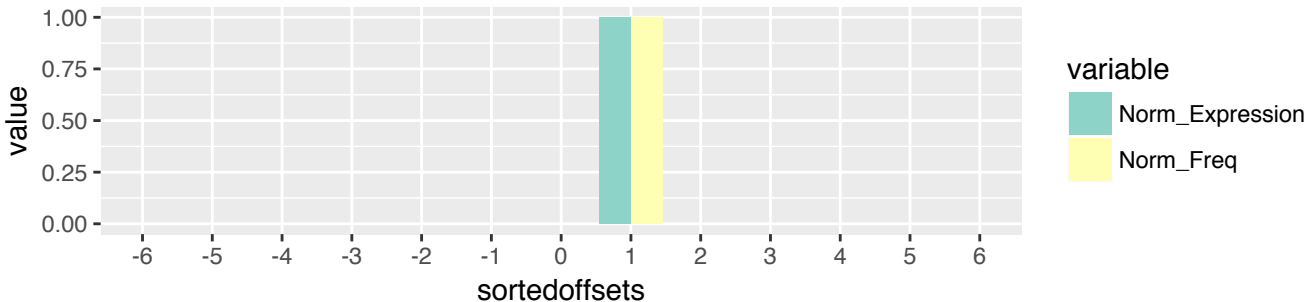

THYM (n=783)  
5'-half & exclusive (n=5)  
5' terminus relative to 5' end of the tRNA (n=5)



THYM (n=783)  
5'-half & exclusive (n=5)  
5' terminus relative to 5' end of the tRNA (n=5)

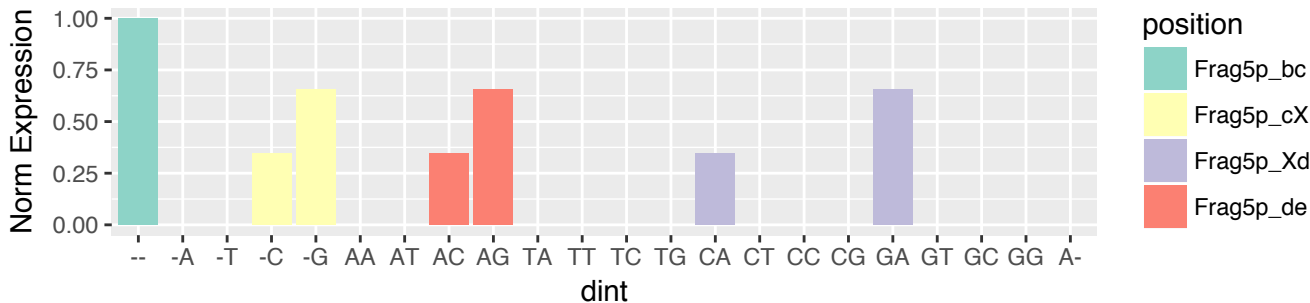

THYM (n=783)  
 5'-half & exclusive (n=5)  
 3' terminus relative to 5' stem of A-loop (n=5)

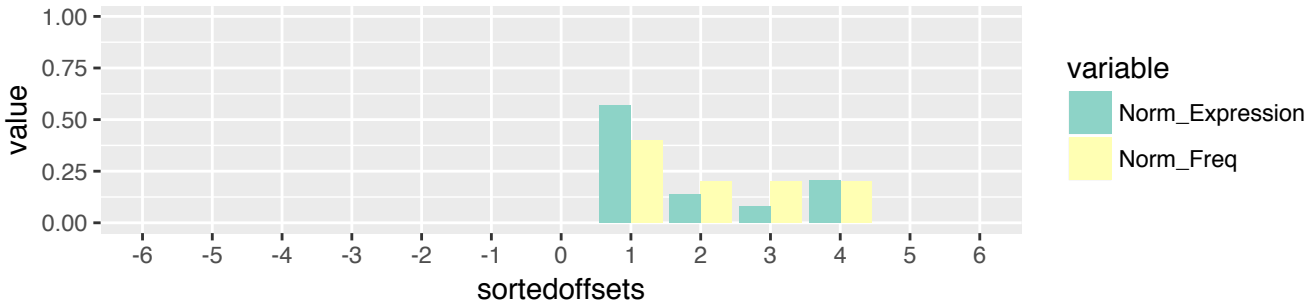

THYM (n=783)  
 5'-half & exclusive (n=5)  
 3' terminus relative to 5' stem of A-loop (n=5)



THYM (n=783)  
 5'-half & exclusive (n=5)  
 3' terminus relative to 5' stem of A-loop (n=5)

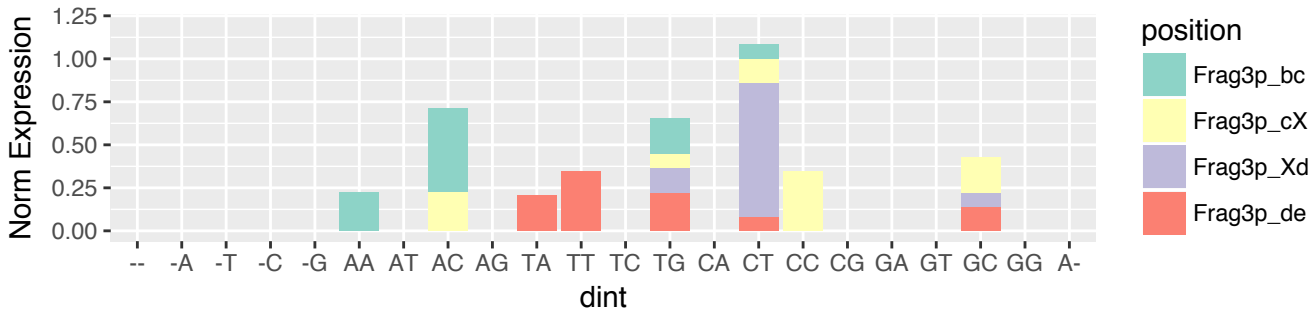

THYM (n=783)

5'-tRF & exclusive (n=129)

5' terminus relative to 5' end of the tRNA (n=129)

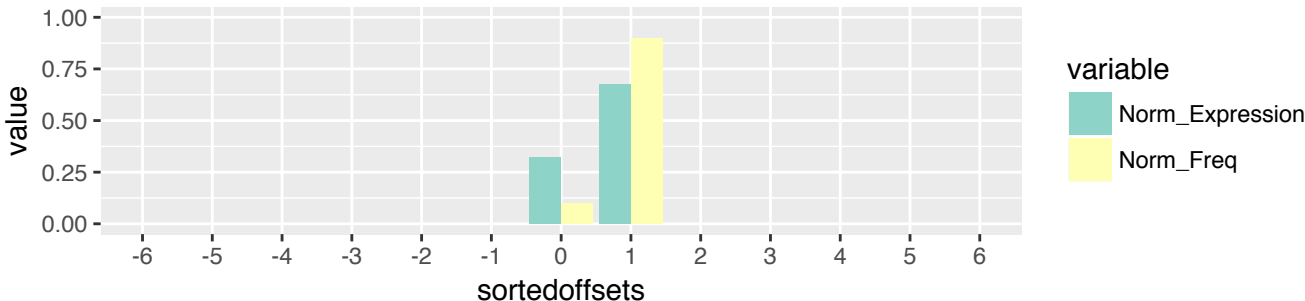

THYM (n=783)

5'-tRF & exclusive (n=129)

5' terminus relative to 5' end of the tRNA (n=129)

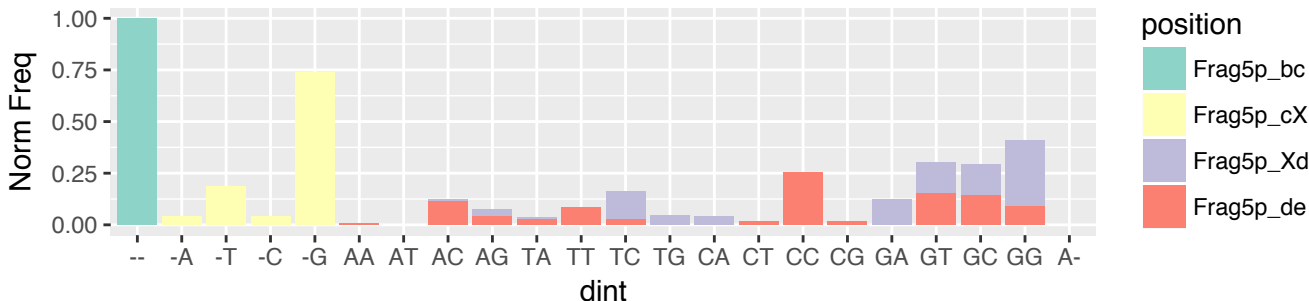

THYM (n=783)

5'-tRF & exclusive (n=129)

5' terminus relative to 5' end of the tRNA (n=129)

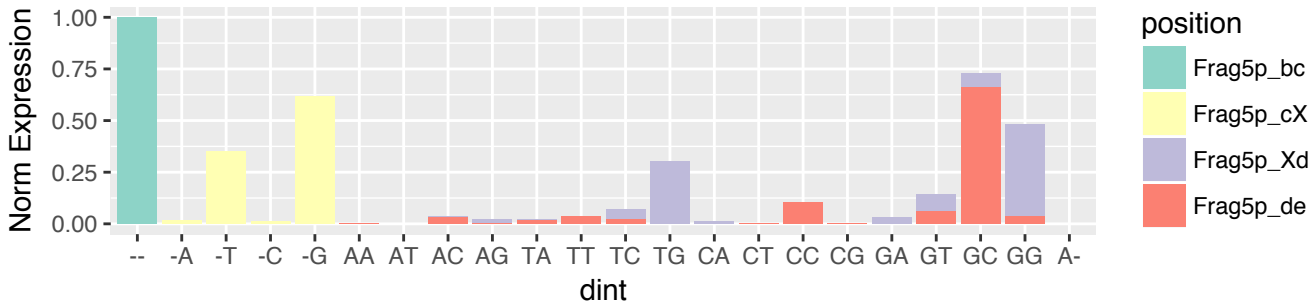

THYM (n=783)  
 5'-tRF & exclusive (n=129)  
 3' terminus relative to 5' stem of D-loop (n=3)

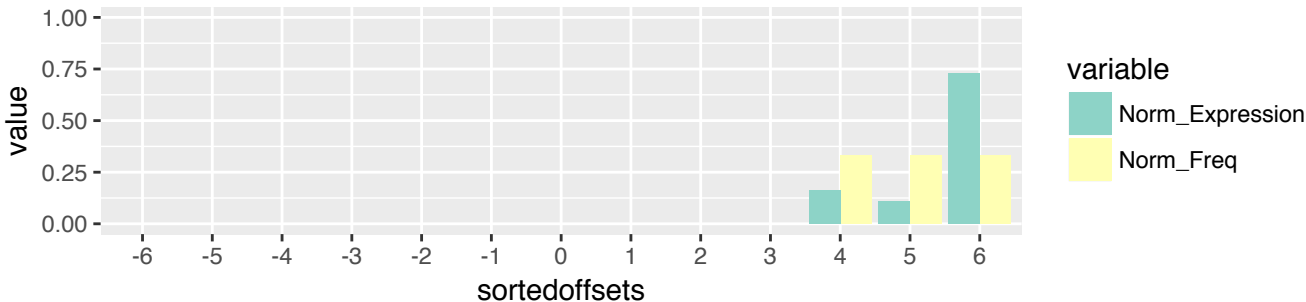

THYM (n=783)  
 5'-tRF & exclusive (n=129)  
 3' terminus relative to 5' stem of D-loop (n=3)

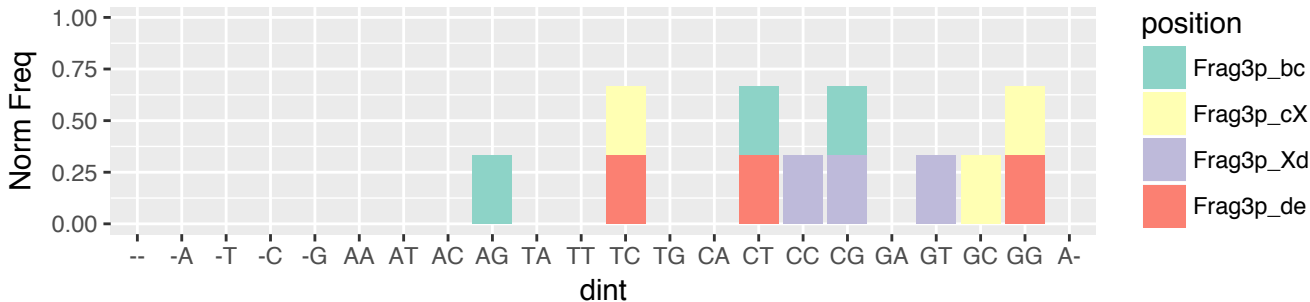

THYM (n=783)  
 5'-tRF & exclusive (n=129)  
 3' terminus relative to 5' stem of D-loop (n=3)

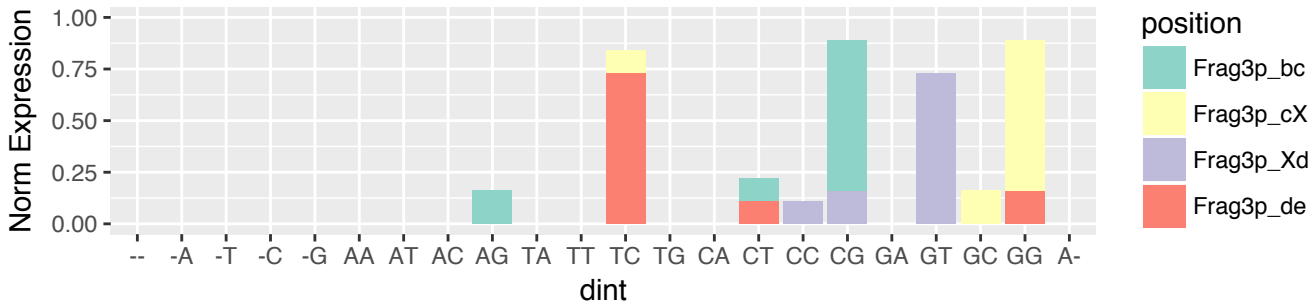

THYM (n=783)  
 5'-tRF & exclusive (n=129)  
 3' terminus relative to 3' stem of D-loop (n=114)

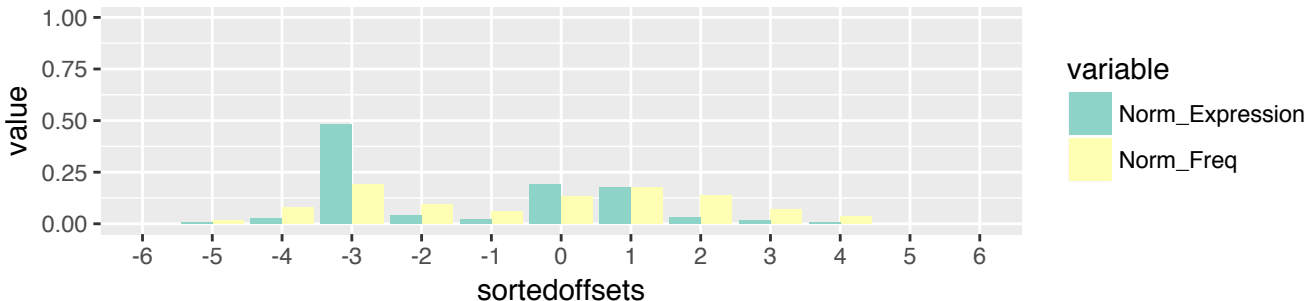

THYM (n=783)  
 5'-tRF & exclusive (n=129)  
 3' terminus relative to 3' stem of D-loop (n=114)

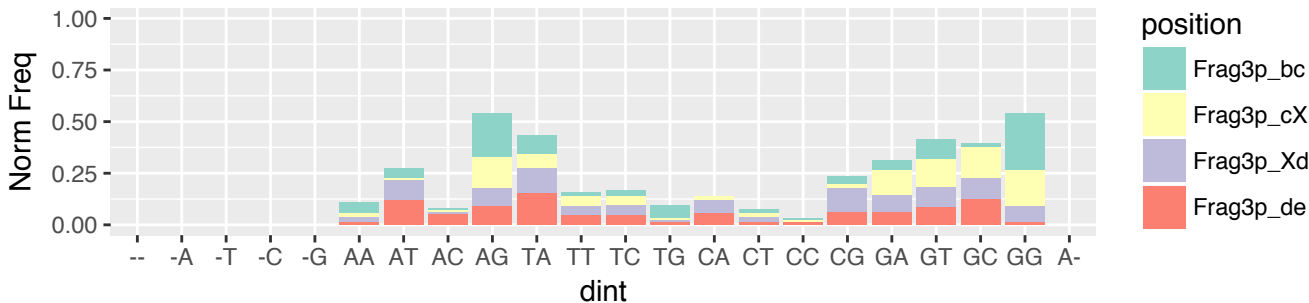

THYM (n=783)  
 5'-tRF & exclusive (n=129)  
 3' terminus relative to 3' stem of D-loop (n=114)

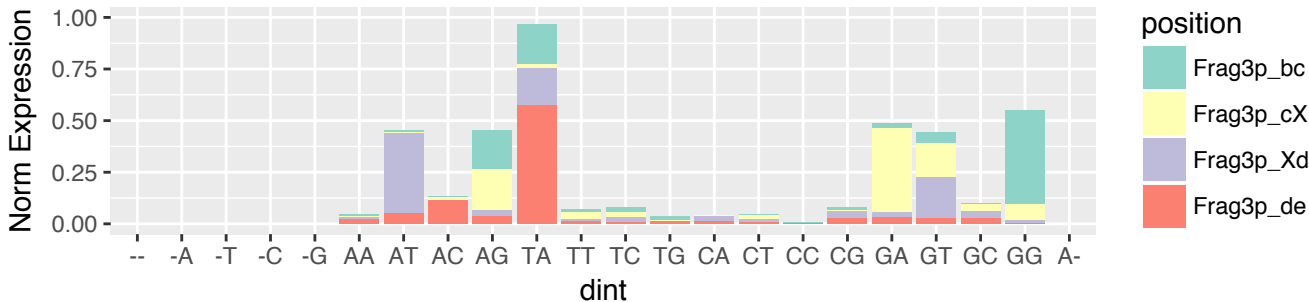



THYM (n=783)  
 5'-tRF & exclusive (n=129)  
 3' terminus relative to 5' stem of A-loop (n=7)

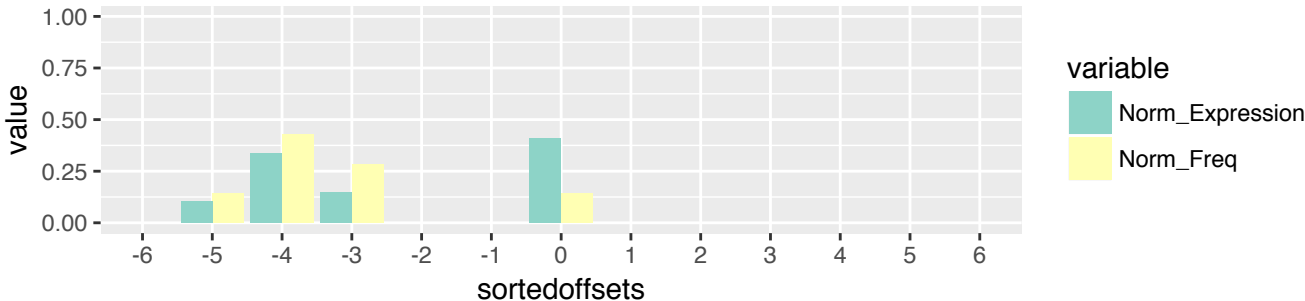

THYM (n=783)  
 5'-tRF & exclusive (n=129)  
 3' terminus relative to 5' stem of A-loop (n=7)

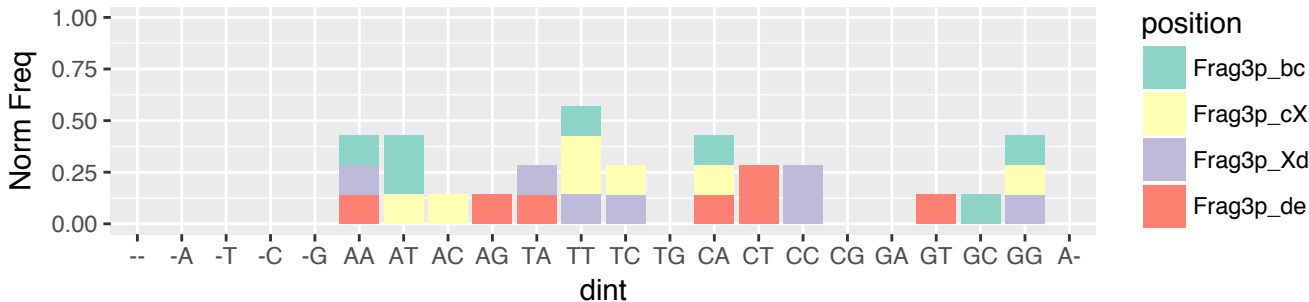

THYM (n=783)  
 5'-tRF & exclusive (n=129)  
 3' terminus relative to 5' stem of A-loop (n=7)

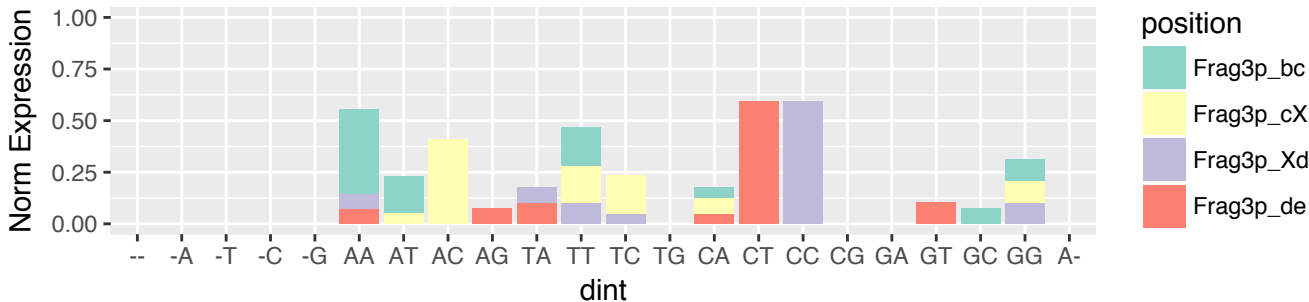

THYM (n=783)  
 5'-tRF & exclusive (n=129)  
 3' terminus relative to 3' stem of A-loop (n=5)

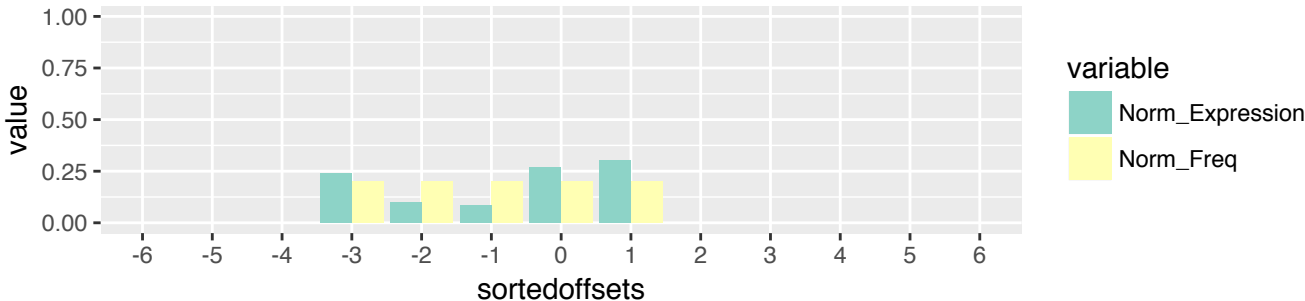

THYM (n=783)  
 5'-tRF & exclusive (n=129)  
 3' terminus relative to 3' stem of A-loop (n=5)

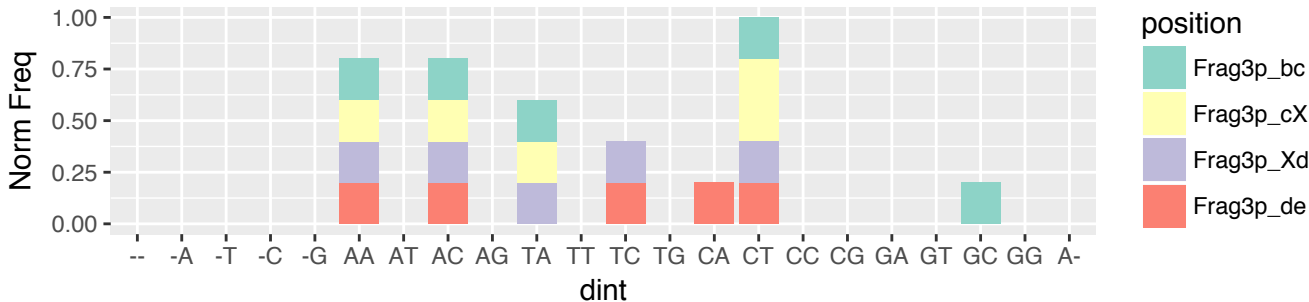

THYM (n=783)  
 5'-tRF & exclusive (n=129)  
 3' terminus relative to 3' stem of A-loop (n=5)

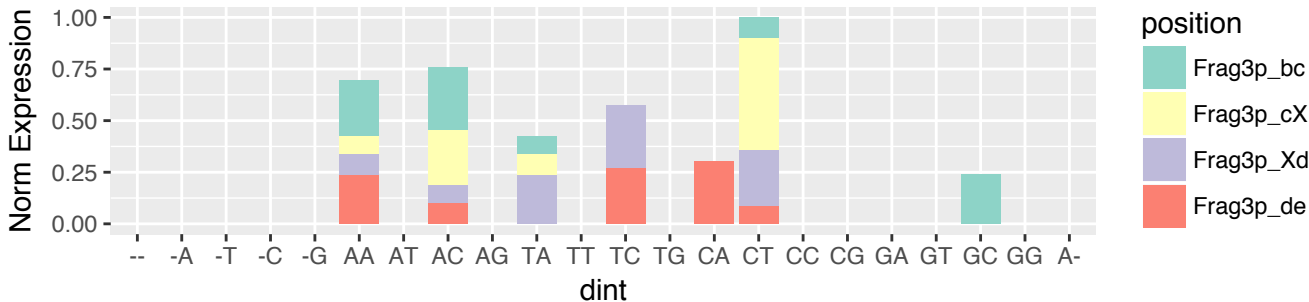

THYM (n=783)  
 i-tRF & exclusive (n=176)  
 5' terminus relative to 5' end of the tRNA (n=4)

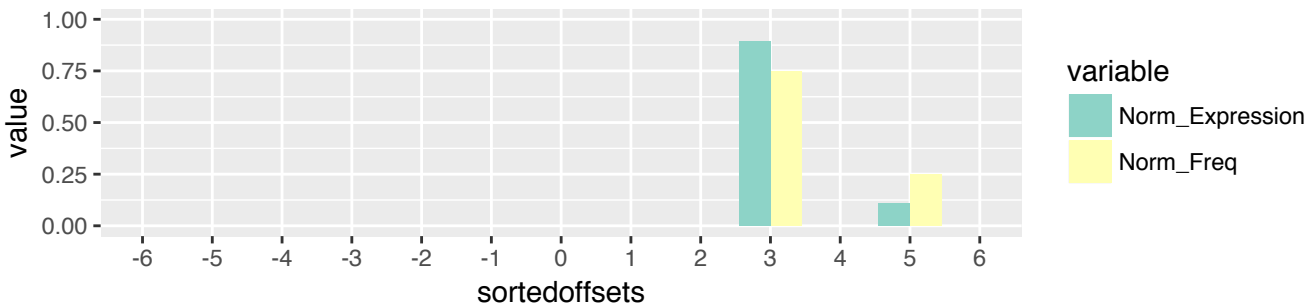

THYM (n=783)  
 i-tRF & exclusive (n=176)  
 5' terminus relative to 5' end of the tRNA (n=4)

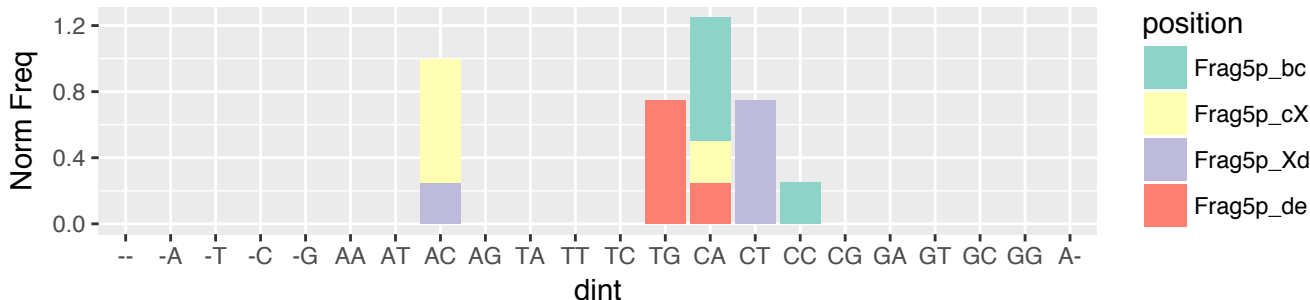

THYM (n=783)  
 i-tRF & exclusive (n=176)  
 5' terminus relative to 5' end of the tRNA (n=4)

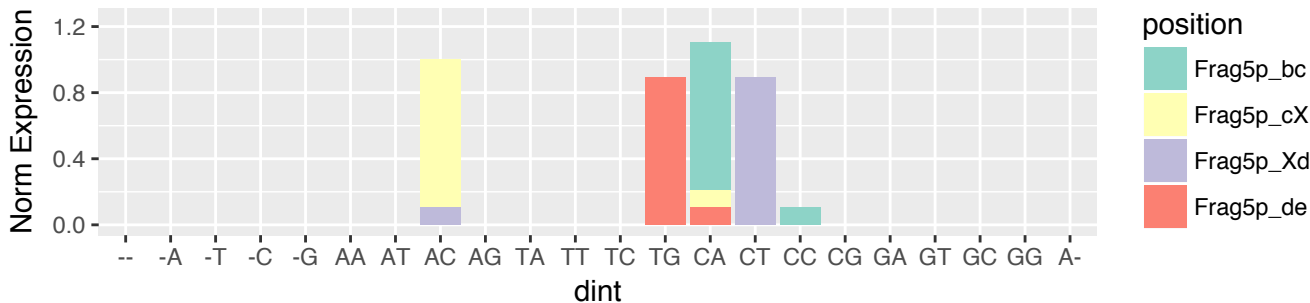

THYM (n=783)  
 i-tRF & exclusive (n=176)  
 5' terminus relative to 5' stem of D-loop (n=64)

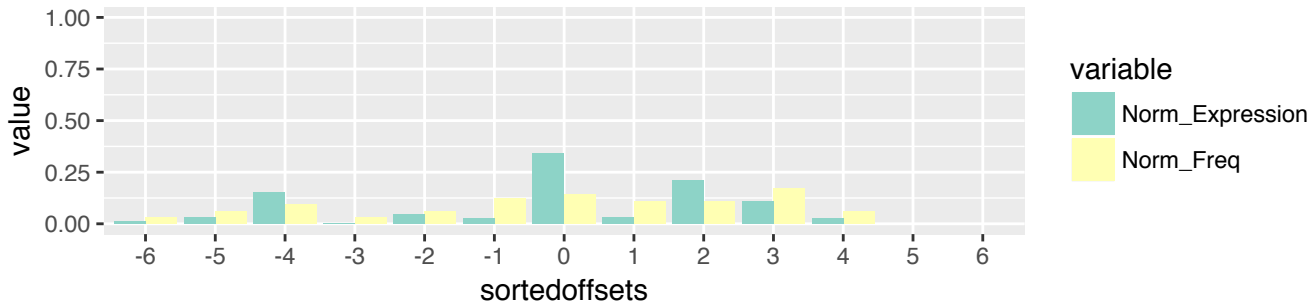

THYM (n=783)  
 i-tRF & exclusive (n=176)  
 5' terminus relative to 5' stem of D-loop (n=64)

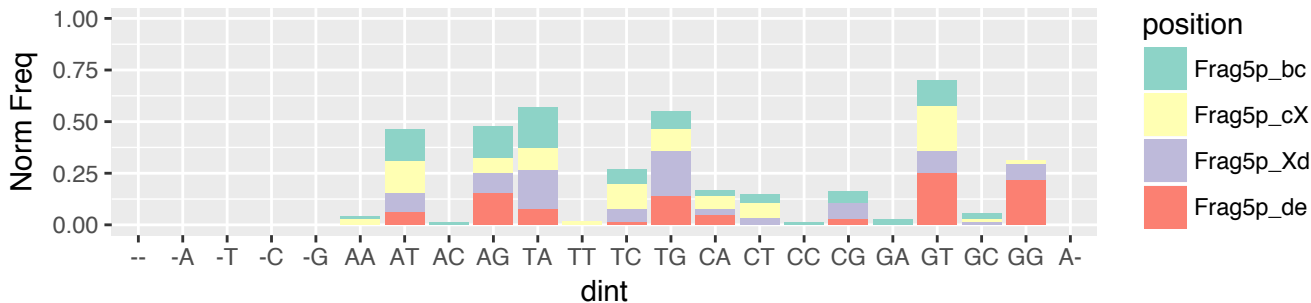

THYM (n=783)  
 i-tRF & exclusive (n=176)  
 5' terminus relative to 5' stem of D-loop (n=64)

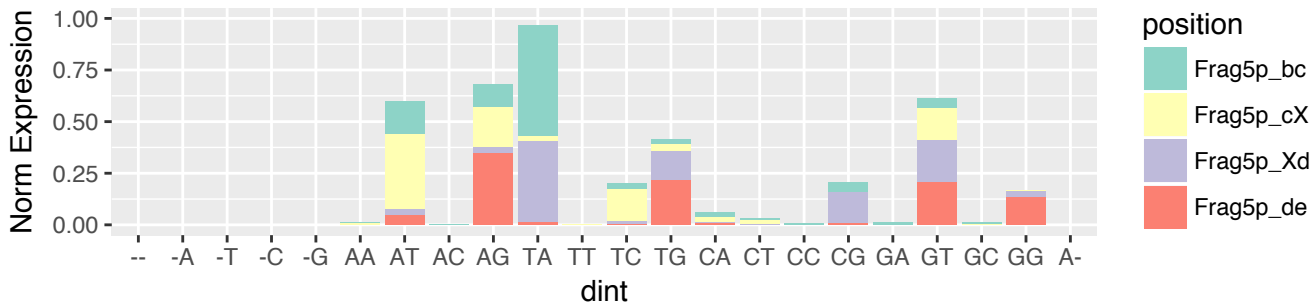

THYM (n=783)  
 i-tRF & exclusive (n=176)  
 5' terminus relative to 3' stem of D-loop (n=6)

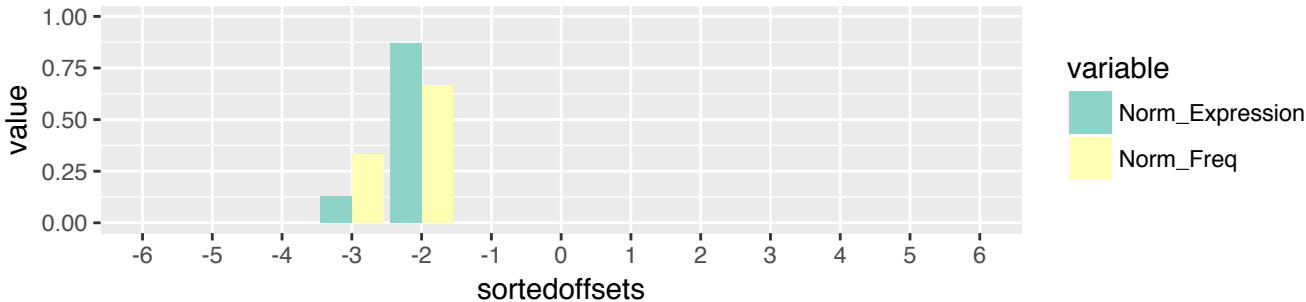

THYM (n=783)  
 i-tRF & exclusive (n=176)  
 5' terminus relative to 3' stem of D-loop (n=6)

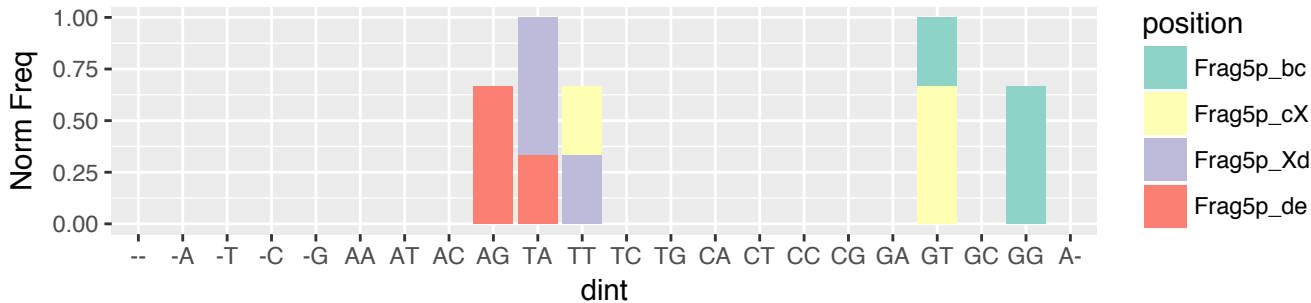

THYM (n=783)  
 i-tRF & exclusive (n=176)  
 5' terminus relative to 3' stem of D-loop (n=6)

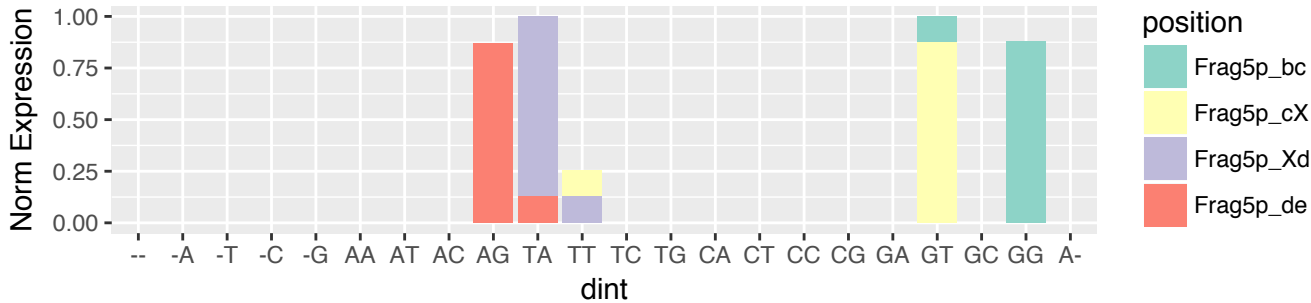

THYM (n=783)  
 i-tRF & exclusive (n=176)  
 5' terminus relative to 5' stem of A-loop (n=36)

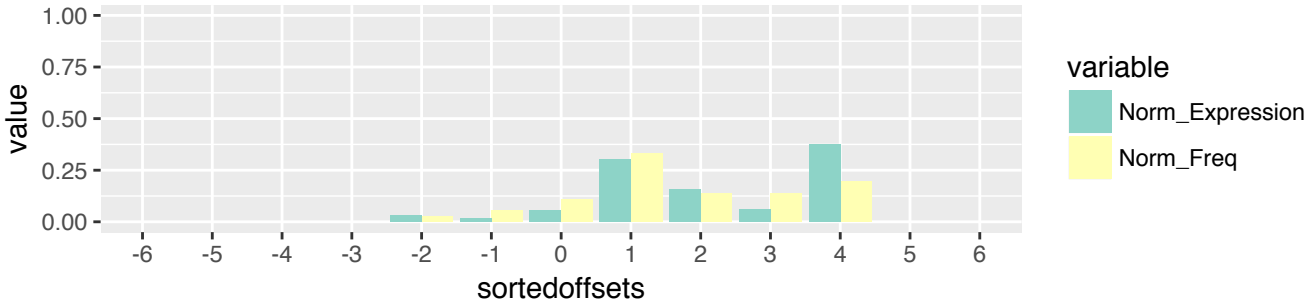

THYM (n=783)  
 i-tRF & exclusive (n=176)  
 5' terminus relative to 5' stem of A-loop (n=36)

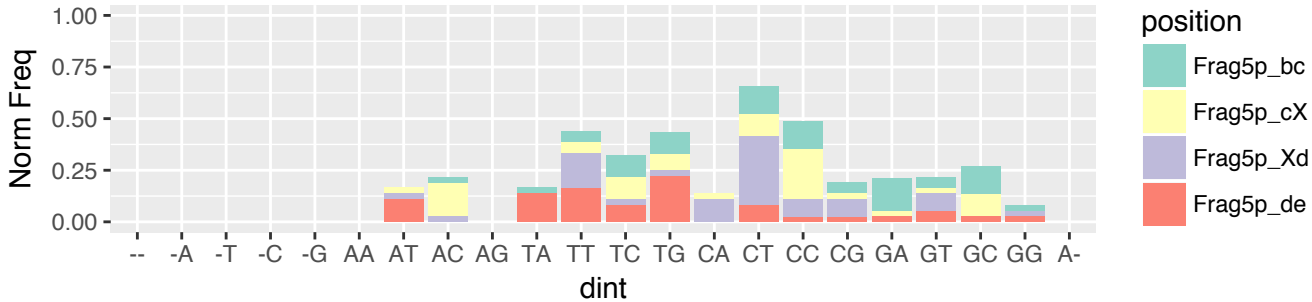

THYM (n=783)  
 i-tRF & exclusive (n=176)  
 5' terminus relative to 5' stem of A-loop (n=36)

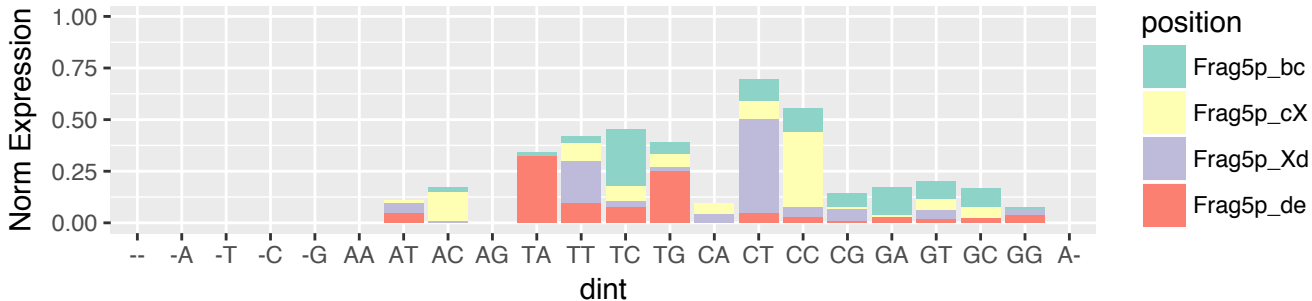

THYM (n=783)  
 i-tRF & exclusive (n=176)  
 5' terminus relative to 3' stem of A-loop (n=53)

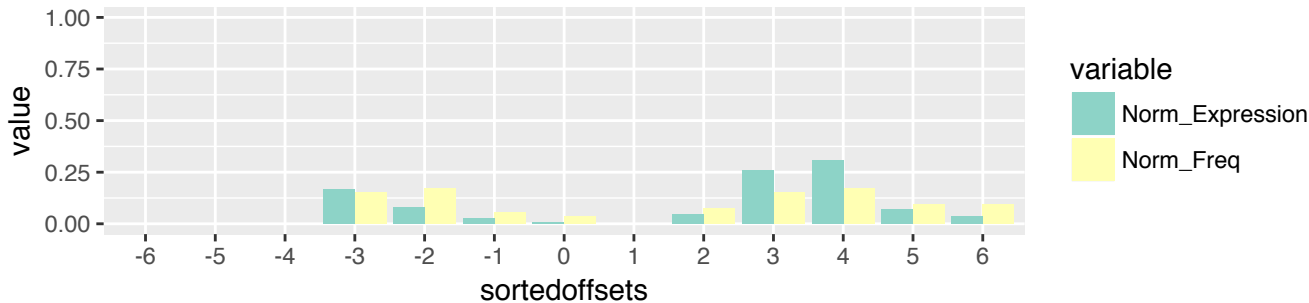

THYM (n=783)  
 i-tRF & exclusive (n=176)  
 5' terminus relative to 3' stem of A-loop (n=53)

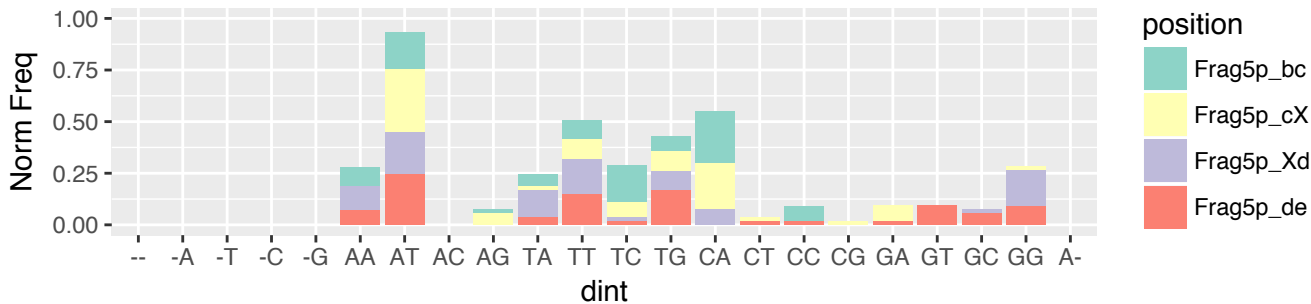

THYM (n=783)  
 i-tRF & exclusive (n=176)  
 5' terminus relative to 3' stem of A-loop (n=53)

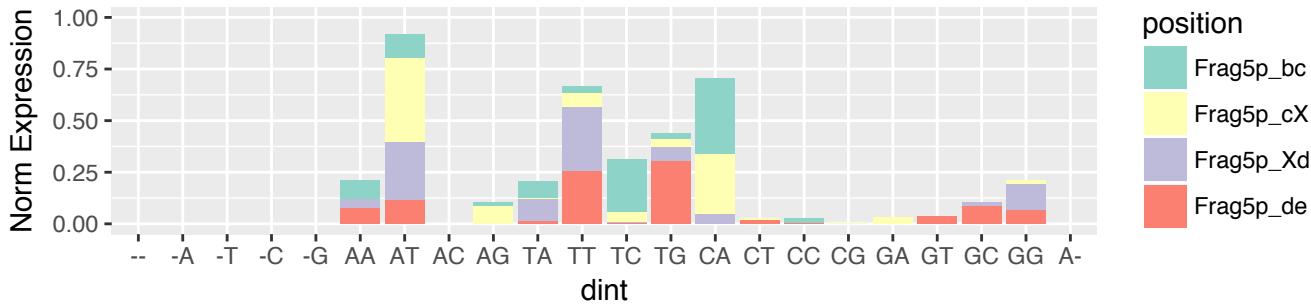

THYM (n=783)  
 i-tRF & exclusive (n=176)  
 5' terminus relative to 5' stem of T-loop (n=13)

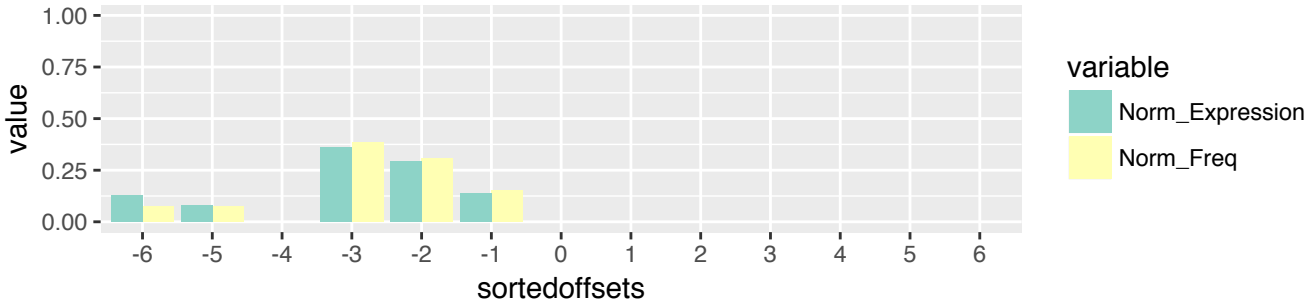

THYM (n=783)  
 i-tRF & exclusive (n=176)  
 5' terminus relative to 5' stem of T-loop (n=13)

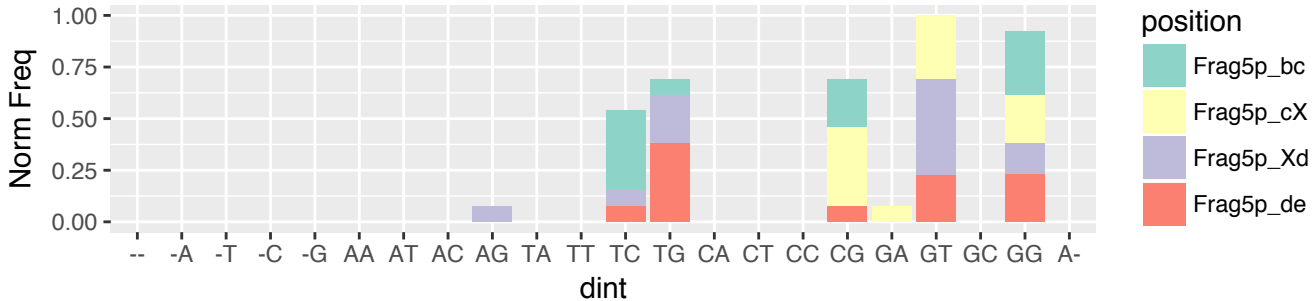

THYM (n=783)  
 i-tRF & exclusive (n=176)  
 5' terminus relative to 5' stem of T-loop (n=13)

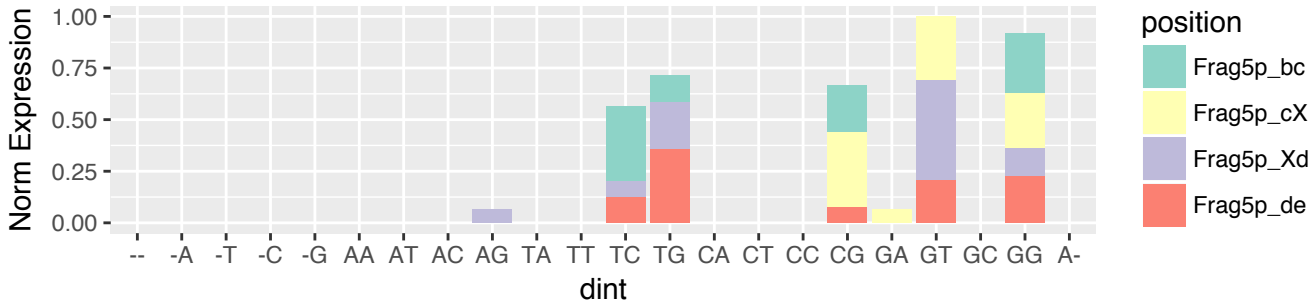



THYM (n=783)  
 i-tRF & exclusive (n=176)  
 3' terminus relative to 5' stem of A-loop (n=61)

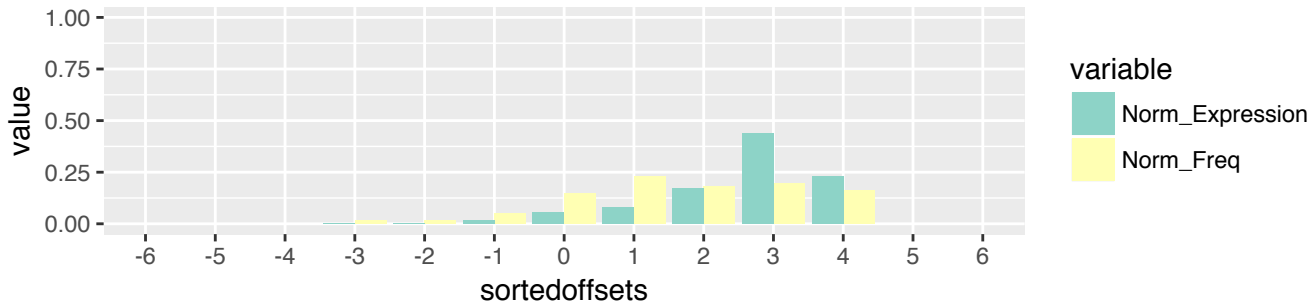

THYM (n=783)  
 i-tRF & exclusive (n=176)  
 3' terminus relative to 5' stem of A-loop (n=61)

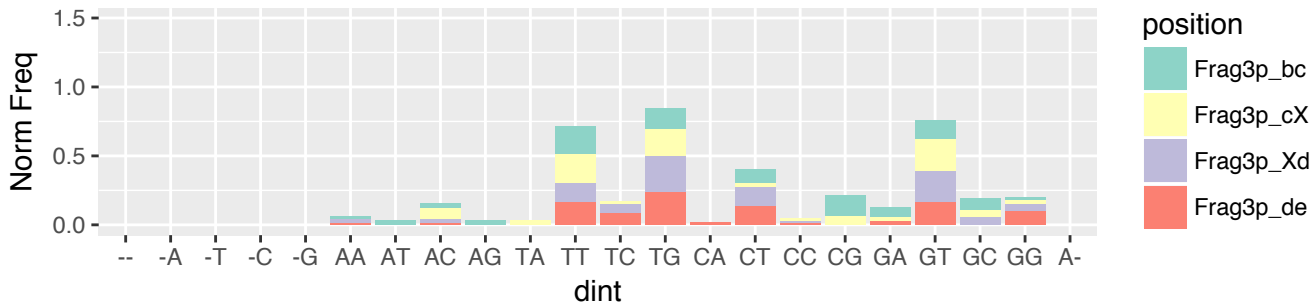

THYM (n=783)  
 i-tRF & exclusive (n=176)  
 3' terminus relative to 5' stem of A-loop (n=61)

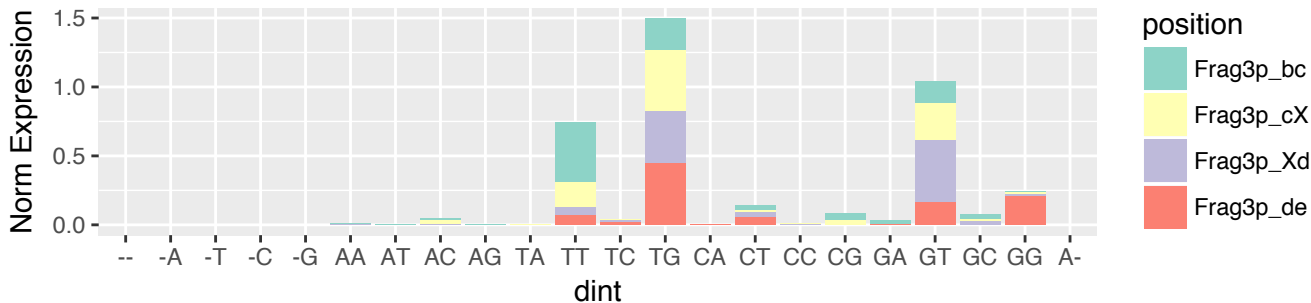

THYM (n=783)  
i-tRF & exclusive (n=176)  
3' terminus relative to 3' stem of A-loop (n=18)

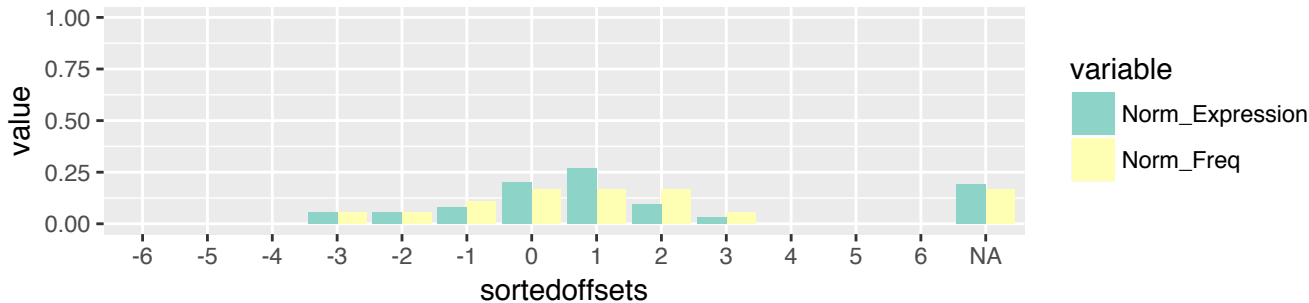

THYM (n=783)  
i-tRF & exclusive (n=176)  
3' terminus relative to 3' stem of A-loop (n=18)

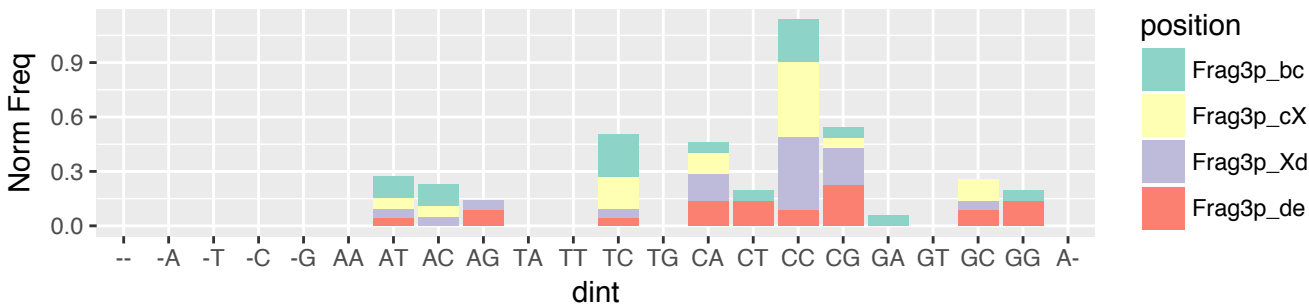

THYM (n=783)  
i-tRF & exclusive (n=176)  
3' terminus relative to 3' stem of A-loop (n=18)

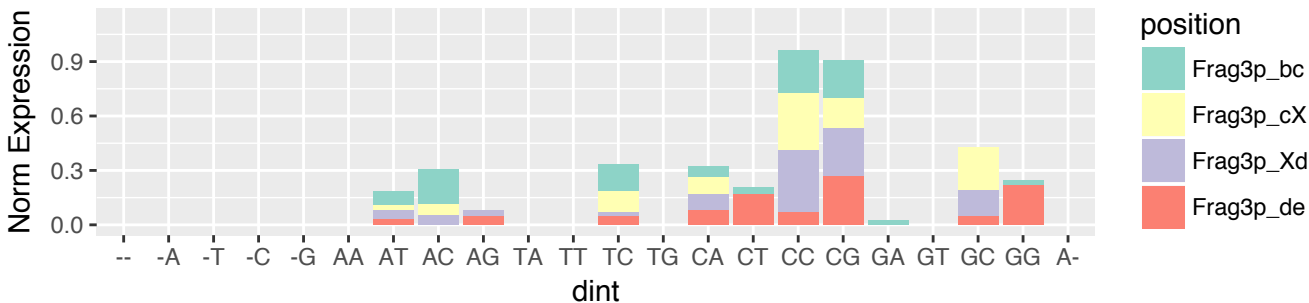

THYM (n=783)  
i-tRF & exclusive (n=176)  
3' terminus relative to 5' stem of T-loop (n=41)

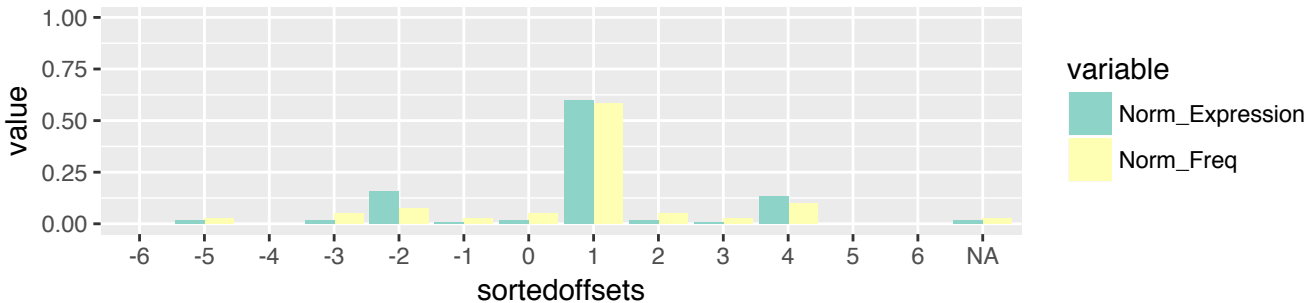

THYM (n=783)  
i-tRF & exclusive (n=176)  
3' terminus relative to 5' stem of T-loop (n=41)

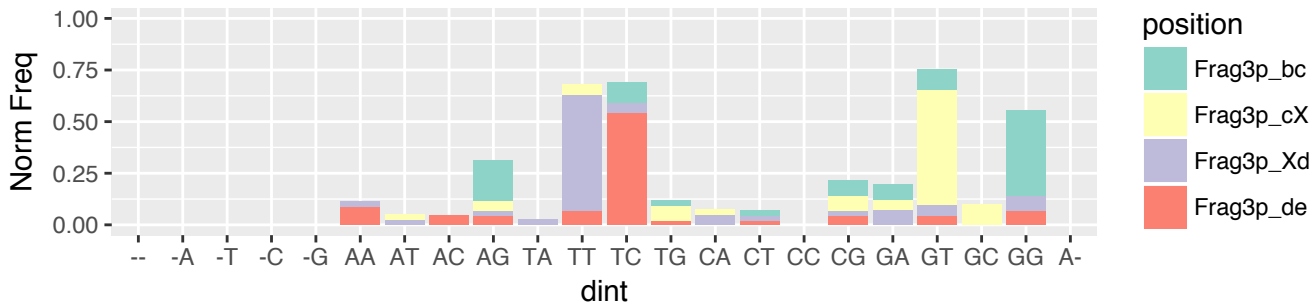

THYM (n=783)  
i-tRF & exclusive (n=176)  
3' terminus relative to 5' stem of T-loop (n=41)

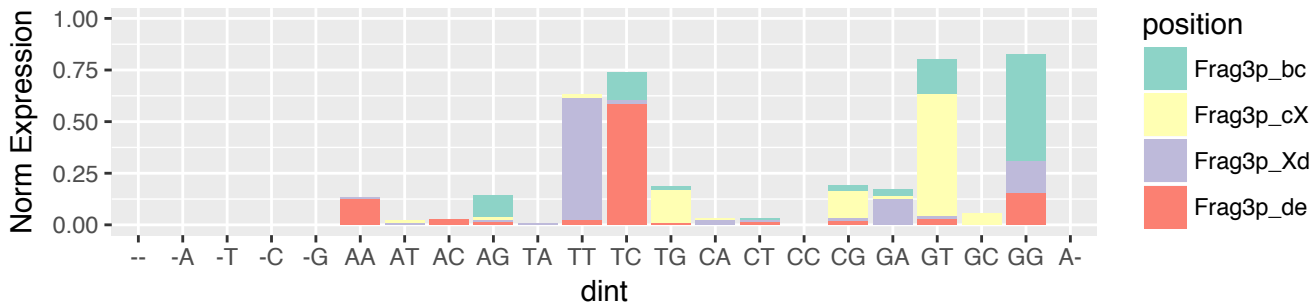

THYM (n=783)  
i-tRF & exclusive (n=176)  
3' terminus relative to 3' stem of T-loop (n=41)

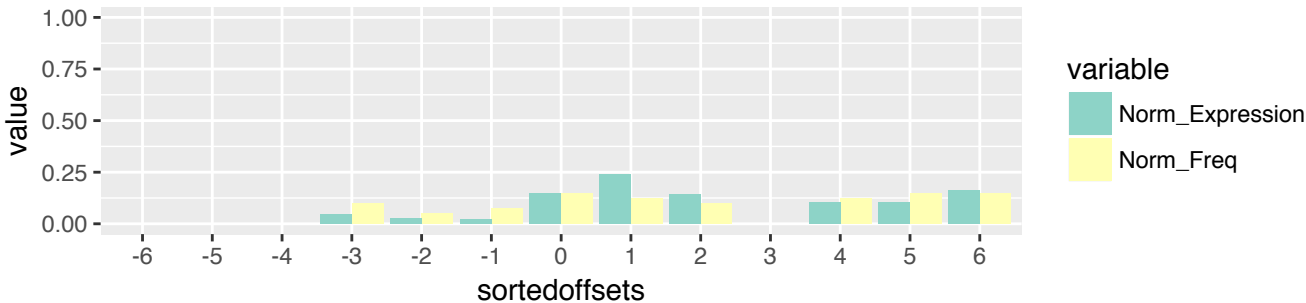

THYM (n=783)  
i-tRF & exclusive (n=176)  
3' terminus relative to 3' stem of T-loop (n=41)

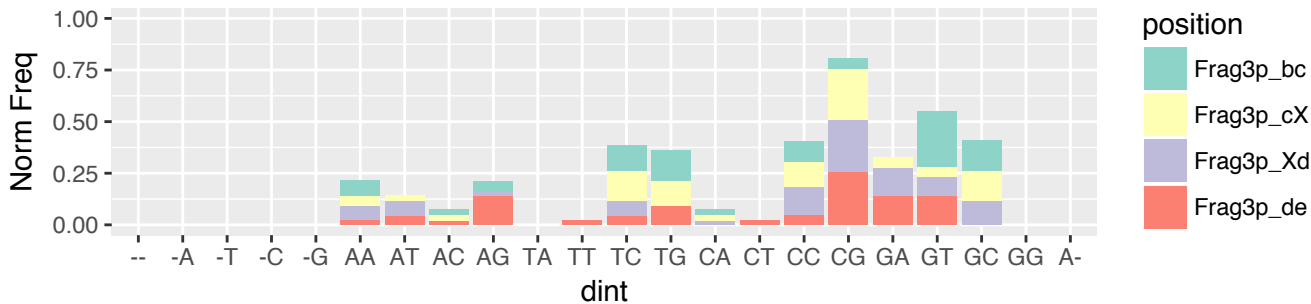

THYM (n=783)  
i-tRF & exclusive (n=176)  
3' terminus relative to 3' stem of T-loop (n=41)

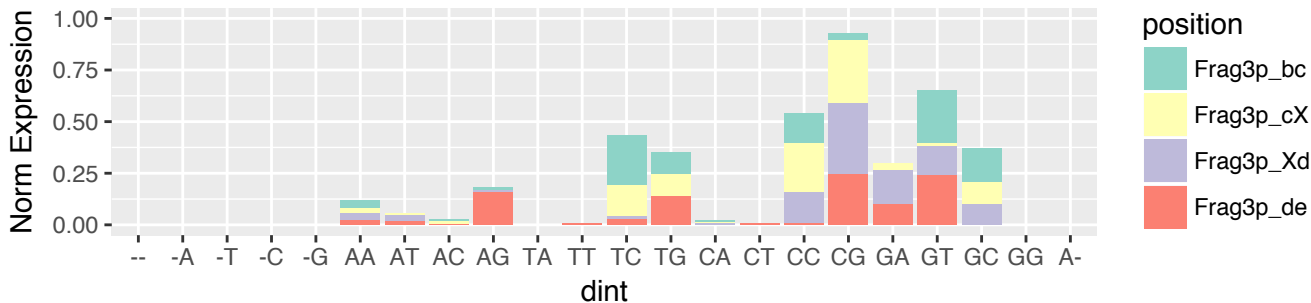

THYM (n=783)  
 i-tRF & exclusive (n=176)  
 3' terminus relative to 3' end of the tRNA (n=16)

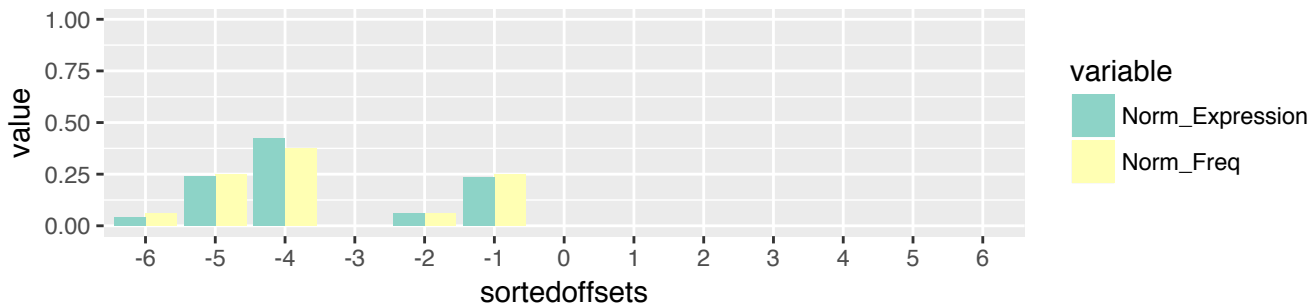

THYM (n=783)  
 i-tRF & exclusive (n=176)  
 3' terminus relative to 3' end of the tRNA (n=16)

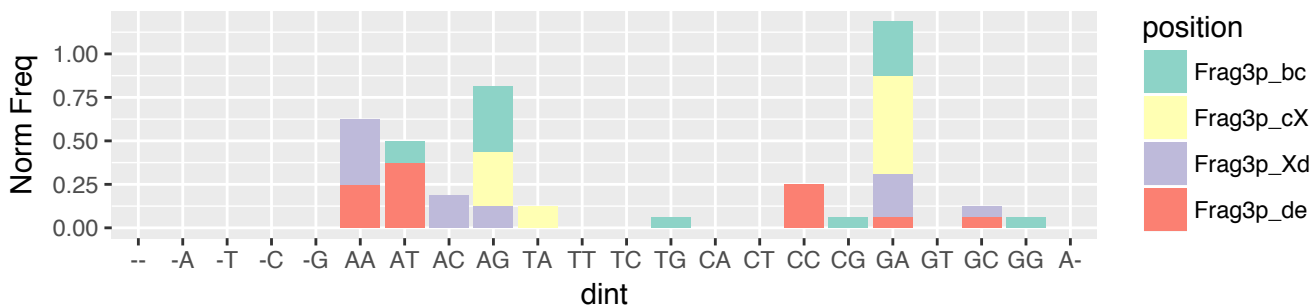

THYM (n=783)  
 i-tRF & exclusive (n=176)  
 3' terminus relative to 3' end of the tRNA (n=16)

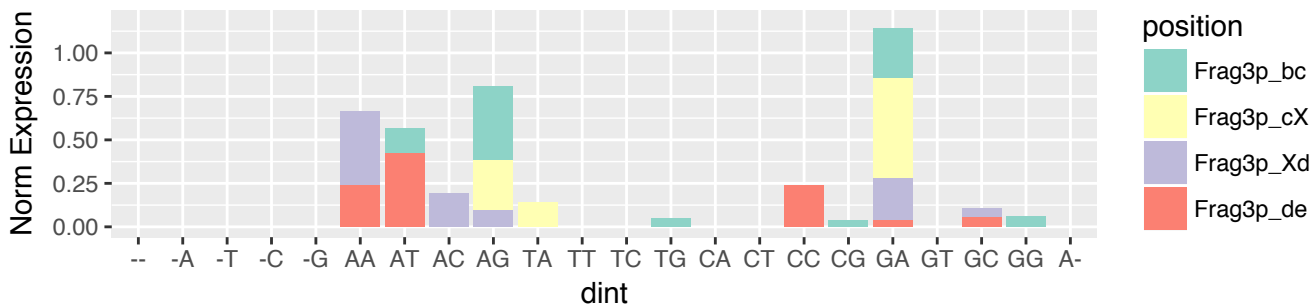

THYM (n=783)  
 3'-tRF & exclusive (n=134)  
 5' terminus relative to 5' stem of T-loop (n=100)

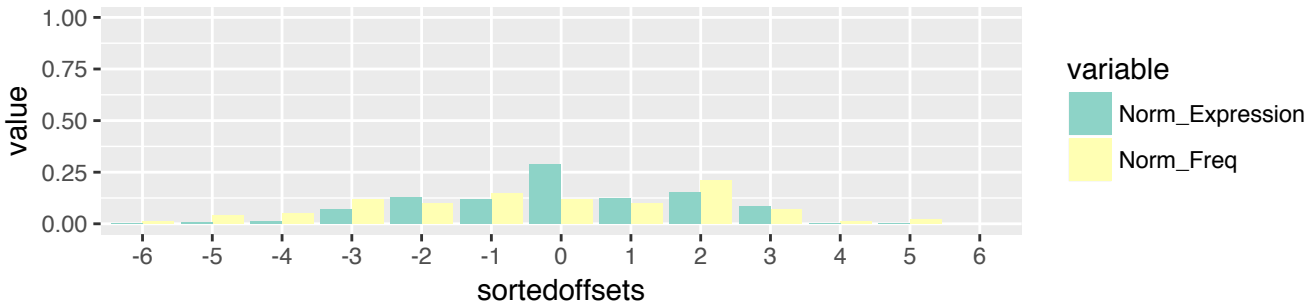

THYM (n=783)  
 3'-tRF & exclusive (n=134)  
 5' terminus relative to 5' stem of T-loop (n=100)

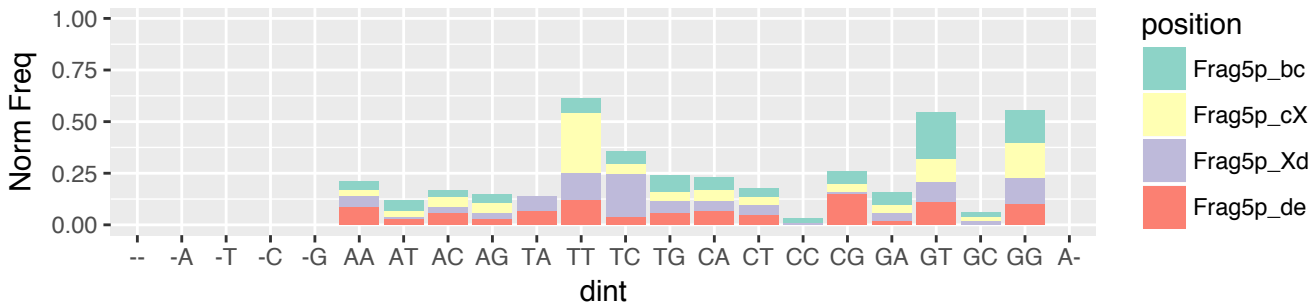

THYM (n=783)  
 3'-tRF & exclusive (n=134)  
 5' terminus relative to 5' stem of T-loop (n=100)

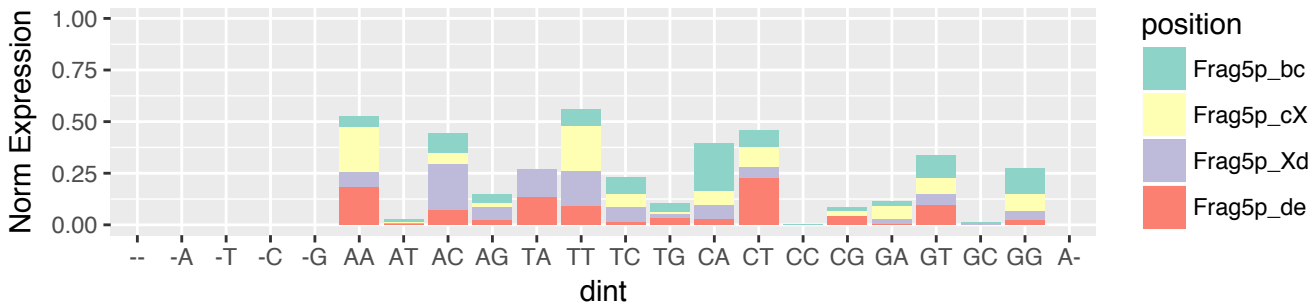

THYM (n=783)  
 3'-tRF & exclusive (n=134)  
 5' terminus relative to 3' stem of T-loop (n=34)

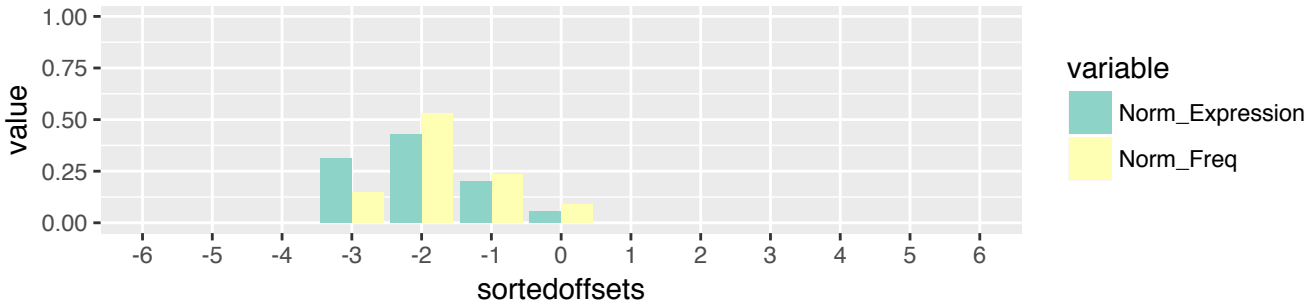

THYM (n=783)  
 3'-tRF & exclusive (n=134)  
 5' terminus relative to 3' stem of T-loop (n=34)

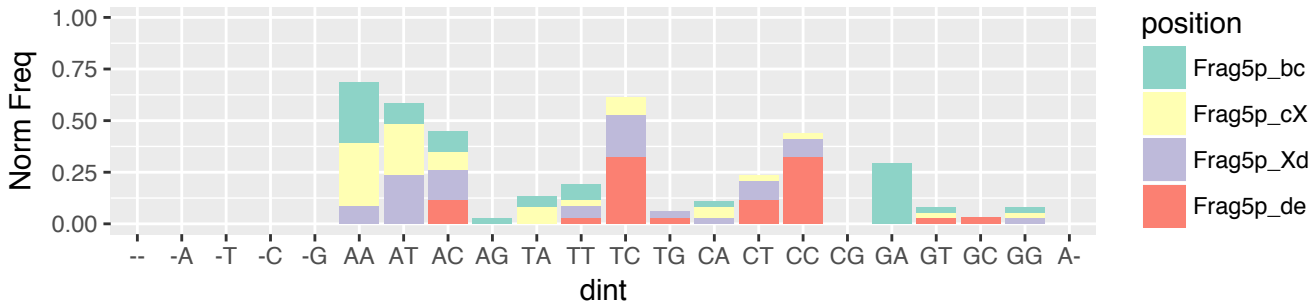

THYM (n=783)  
 3'-tRF & exclusive (n=134)  
 5' terminus relative to 3' stem of T-loop (n=34)

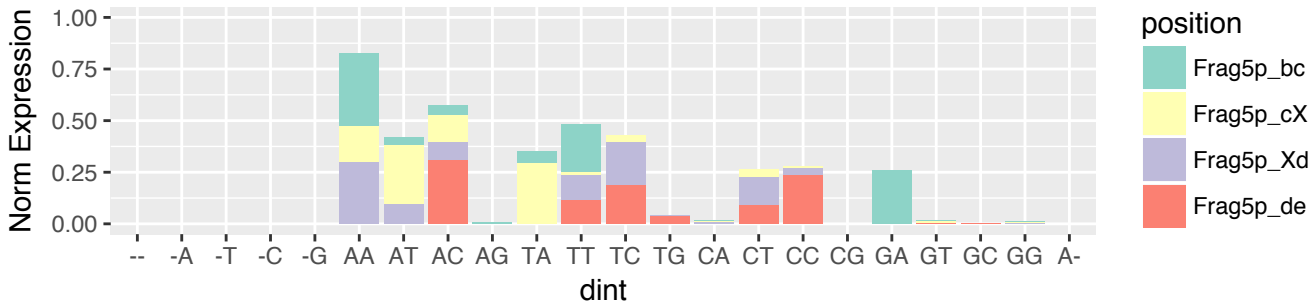

THYM (n=783)

3'-tRF & exclusive (n=134)

3' terminus relative to 3' end of the tRNA (n=134)

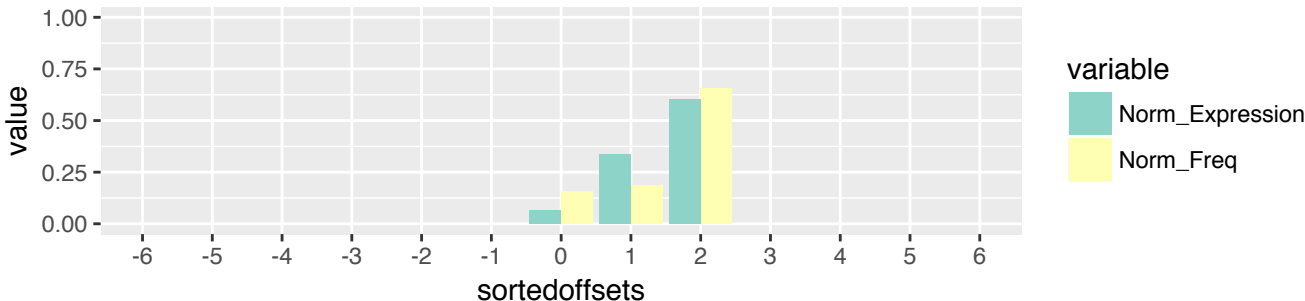

THYM (n=783)

3'-tRF & exclusive (n=134)

3' terminus relative to 3' end of the tRNA (n=134)

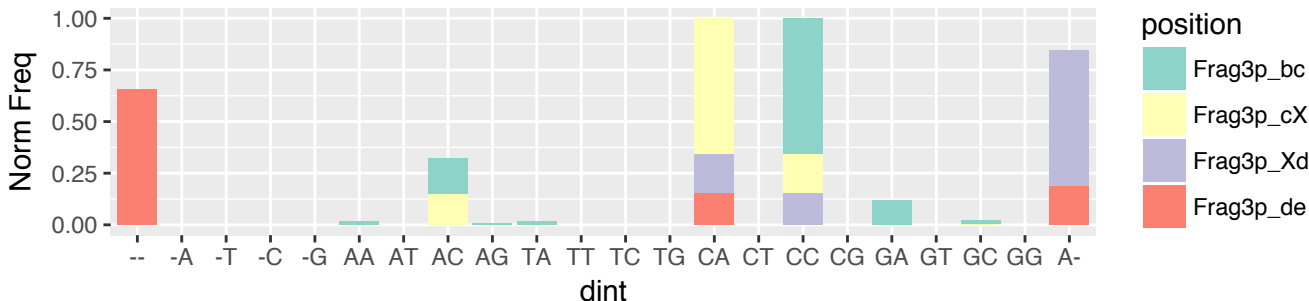

THYM (n=783)

3'-tRF & exclusive (n=134)

3' terminus relative to 3' end of the tRNA (n=134)

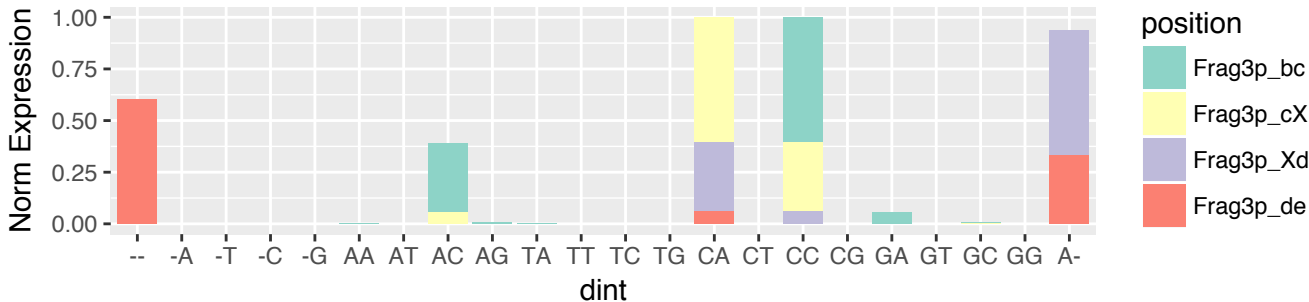



UCEC (n=1208)  
 5'-half & exclusive (n=5)  
 5' terminus relative to 5' end of the tRNA (n=5)

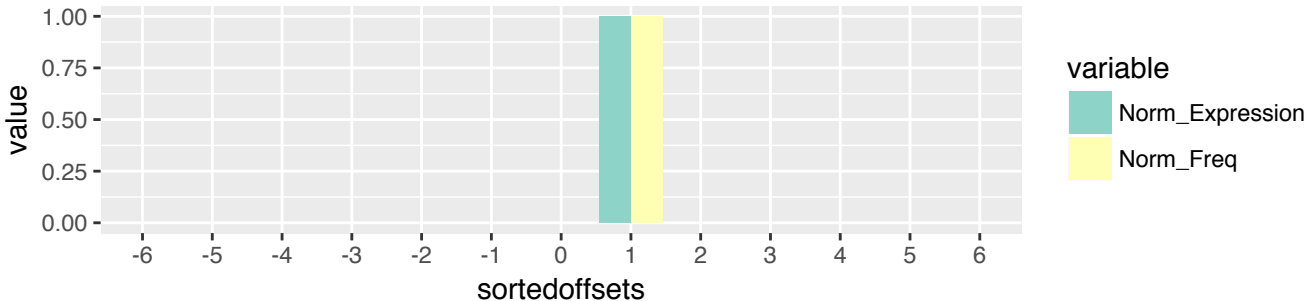

UCEC (n=1208)  
 5'-half & exclusive (n=5)  
 5' terminus relative to 5' end of the tRNA (n=5)

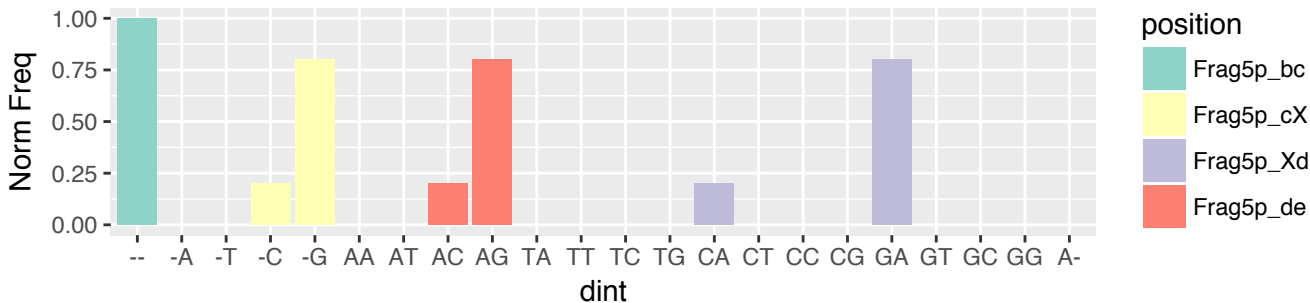

UCEC (n=1208)  
 5'-half & exclusive (n=5)  
 5' terminus relative to 5' end of the tRNA (n=5)

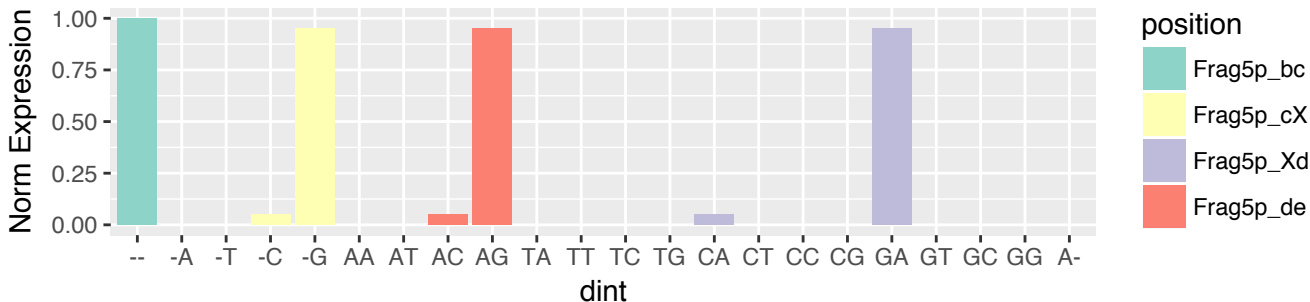

UCEC (n=1208)  
 5'-half & exclusive (n=5)  
 3' terminus relative to 5' stem of A-loop (n=5)

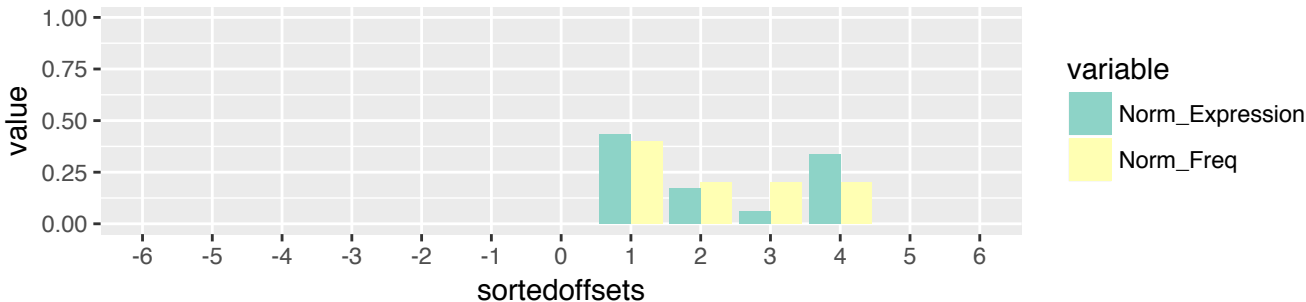

UCEC (n=1208)  
 5'-half & exclusive (n=5)  
 3' terminus relative to 5' stem of A-loop (n=5)



UCEC (n=1208)  
 5'-half & exclusive (n=5)  
 3' terminus relative to 5' stem of A-loop (n=5)

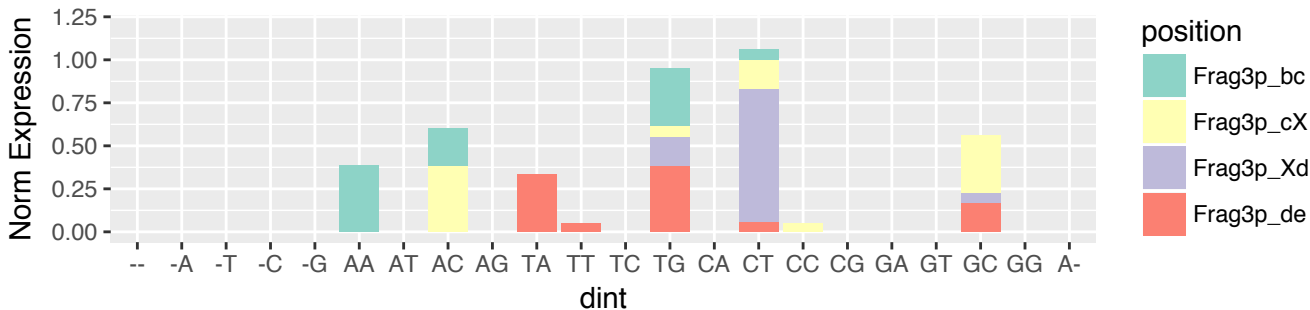

UCEC (n=1208)

5'-tRF & exclusive (n=187)

5' terminus relative to 5' end of the tRNA (n=187)

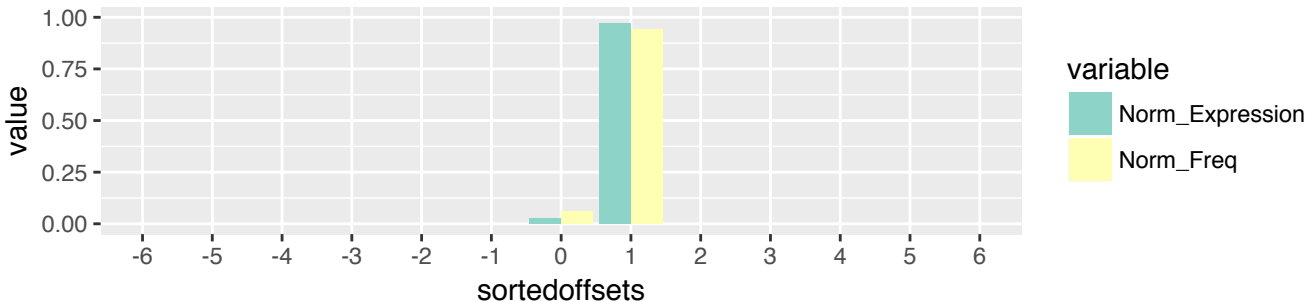

UCEC (n=1208)

5'-tRF & exclusive (n=187)

5' terminus relative to 5' end of the tRNA (n=187)

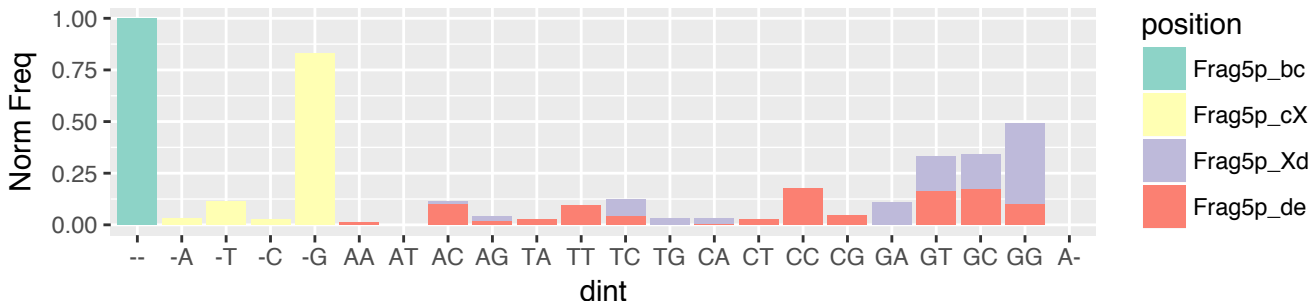

UCEC (n=1208)

5'-tRF & exclusive (n=187)

5' terminus relative to 5' end of the tRNA (n=187)

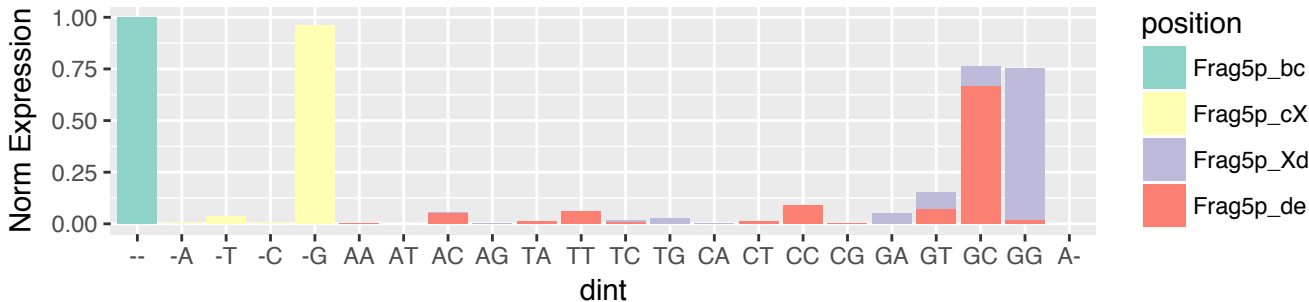

UCEC (n=1208)  
 5'-tRF & exclusive (n=187)  
 3' terminus relative to 5' stem of D-loop (n=16)

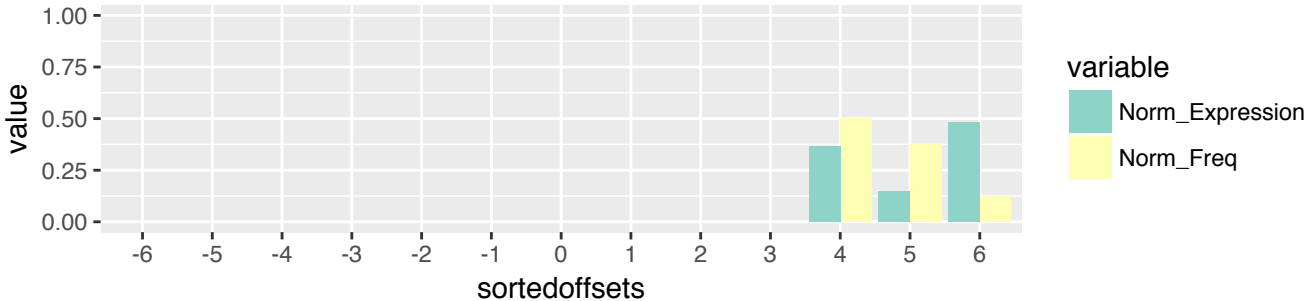

UCEC (n=1208)  
 5'-tRF & exclusive (n=187)  
 3' terminus relative to 5' stem of D-loop (n=16)

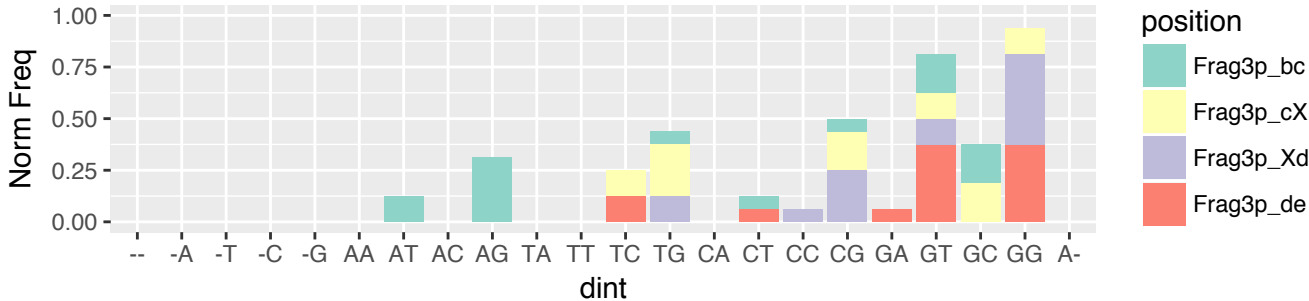

UCEC (n=1208)  
 5'-tRF & exclusive (n=187)  
 3' terminus relative to 5' stem of D-loop (n=16)

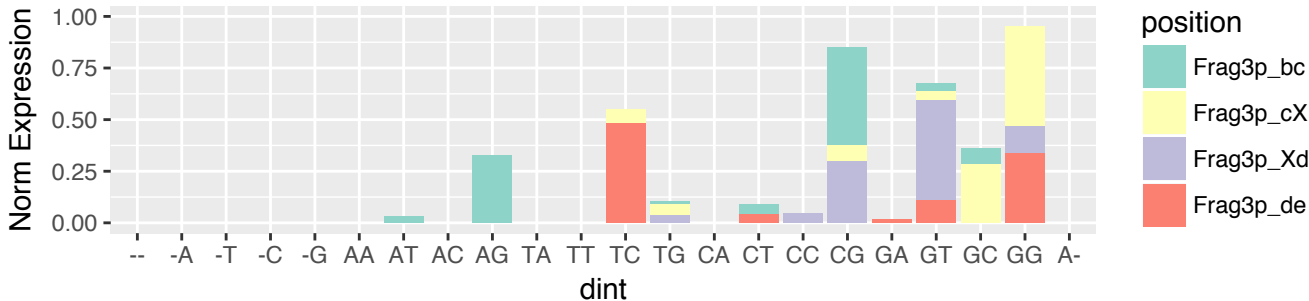

UCEC (n=1208)  
 5'-tRF & exclusive (n=187)  
 3' terminus relative to 3' stem of D-loop (n=161)

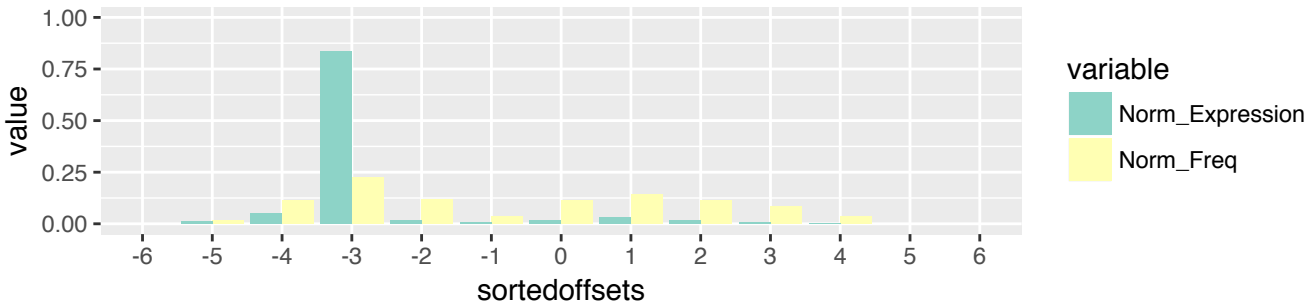

UCEC (n=1208)  
 5'-tRF & exclusive (n=187)  
 3' terminus relative to 3' stem of D-loop (n=161)

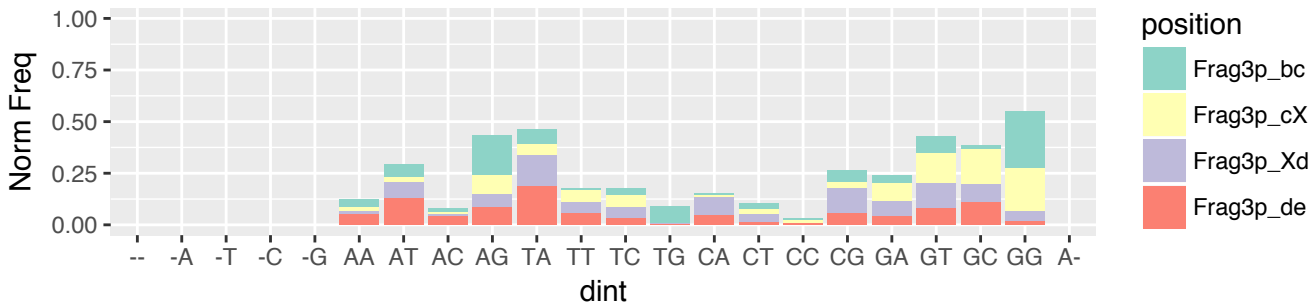

UCEC (n=1208)  
 5'-tRF & exclusive (n=187)  
 3' terminus relative to 3' stem of D-loop (n=161)

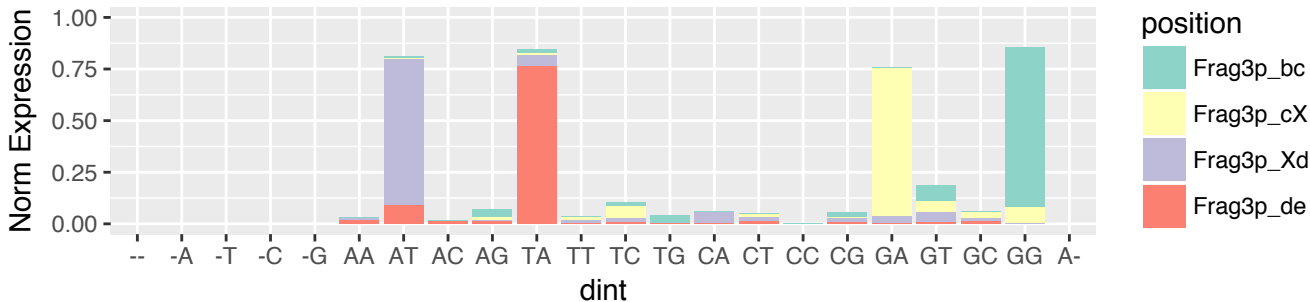

UCEC (n=1208)  
 5'-tRF & exclusive (n=187)  
 3' terminus relative to 5' stem of A-loop (n=6)

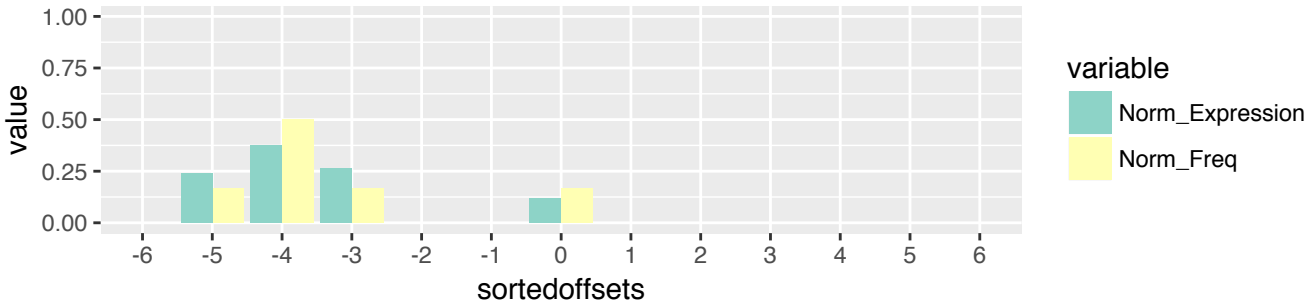

UCEC (n=1208)  
 5'-tRF & exclusive (n=187)  
 3' terminus relative to 5' stem of A-loop (n=6)



UCEC (n=1208)  
 5'-tRF & exclusive (n=187)  
 3' terminus relative to 5' stem of A-loop (n=6)

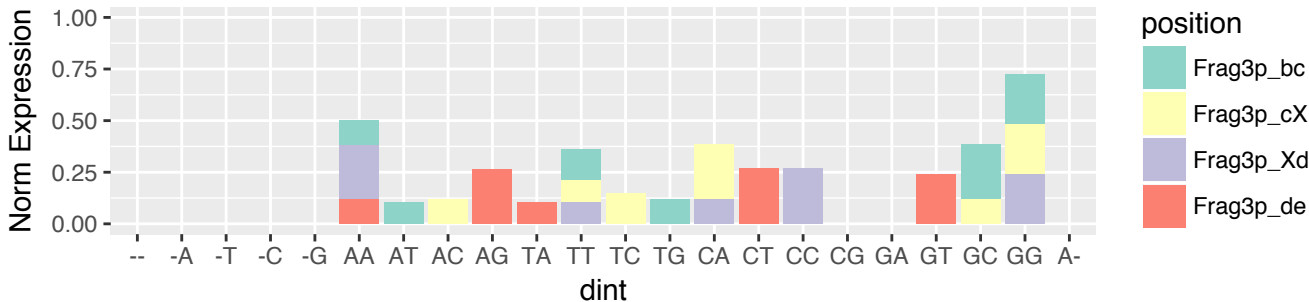

UCEC (n=1208)  
 5'-tRF & exclusive (n=187)  
 3' terminus relative to 3' stem of A-loop (n=4)

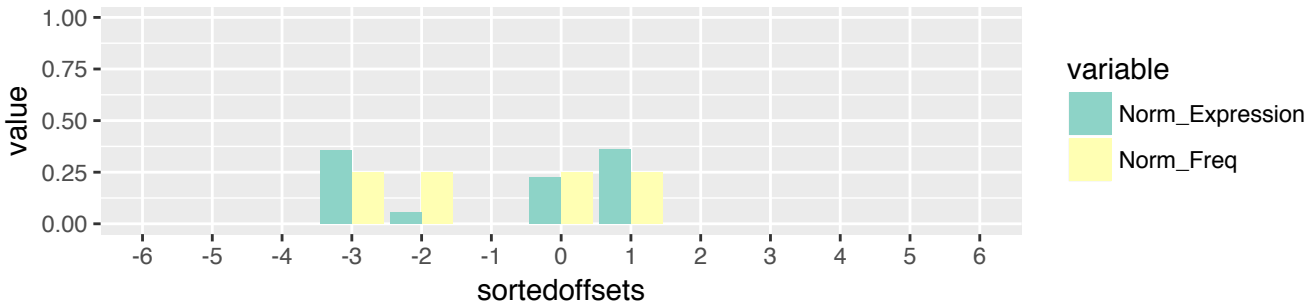

UCEC (n=1208)  
 5'-tRF & exclusive (n=187)  
 3' terminus relative to 3' stem of A-loop (n=4)



UCEC (n=1208)  
 5'-tRF & exclusive (n=187)  
 3' terminus relative to 3' stem of A-loop (n=4)

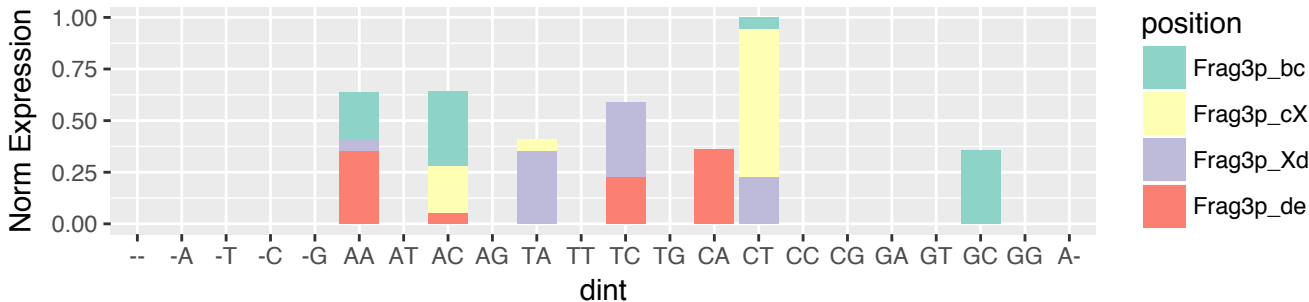

UCEC (n=1208)  
i-tRF & exclusive (n=260)  
5' terminus relative to 5' end of the tRNA (n=15)

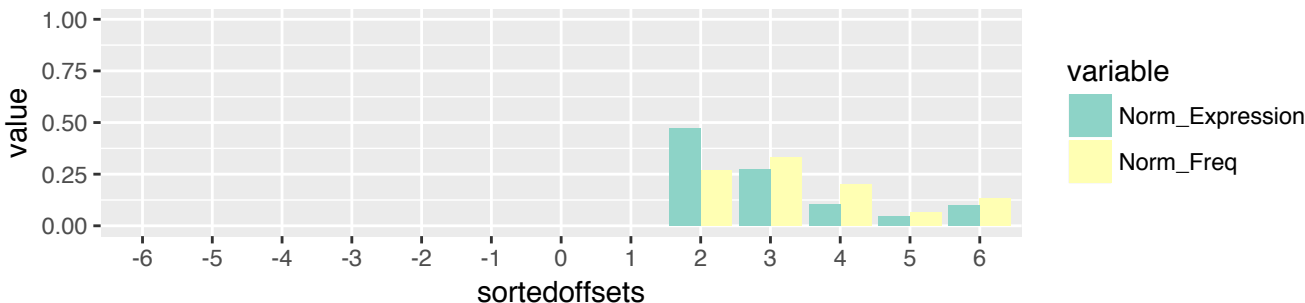

UCEC (n=1208)  
i-tRF & exclusive (n=260)  
5' terminus relative to 5' end of the tRNA (n=15)

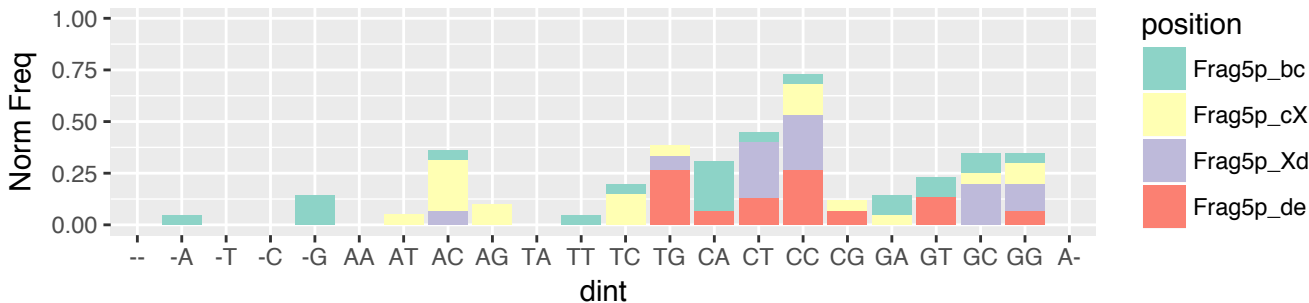

UCEC (n=1208)  
i-tRF & exclusive (n=260)  
5' terminus relative to 5' end of the tRNA (n=15)

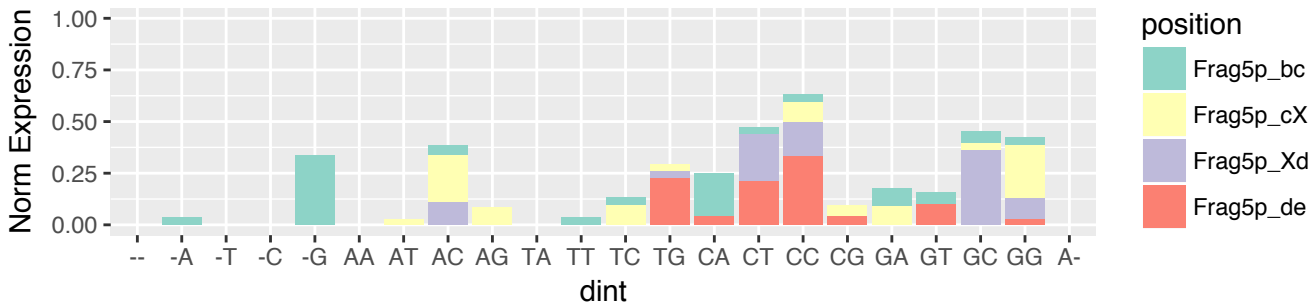



UCEC (n=1208)  
 i-tRF & exclusive (n=260)  
 5' terminus relative to 5' stem of D-loop (n=101)

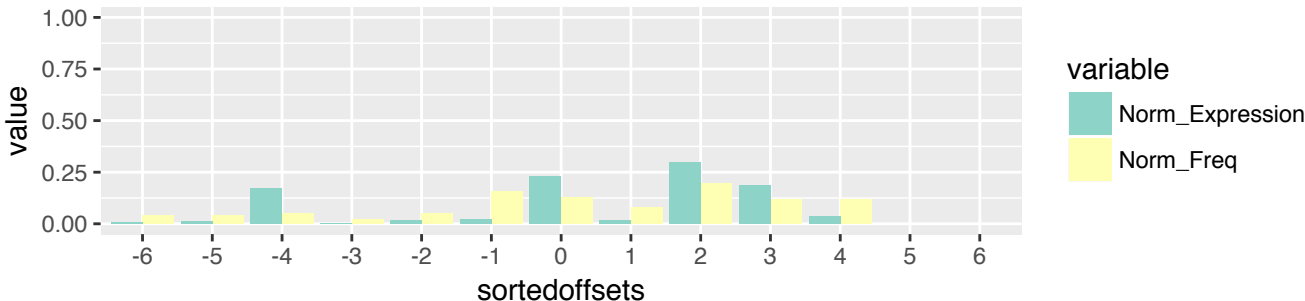

UCEC (n=1208)  
 i-tRF & exclusive (n=260)  
 5' terminus relative to 5' stem of D-loop (n=101)

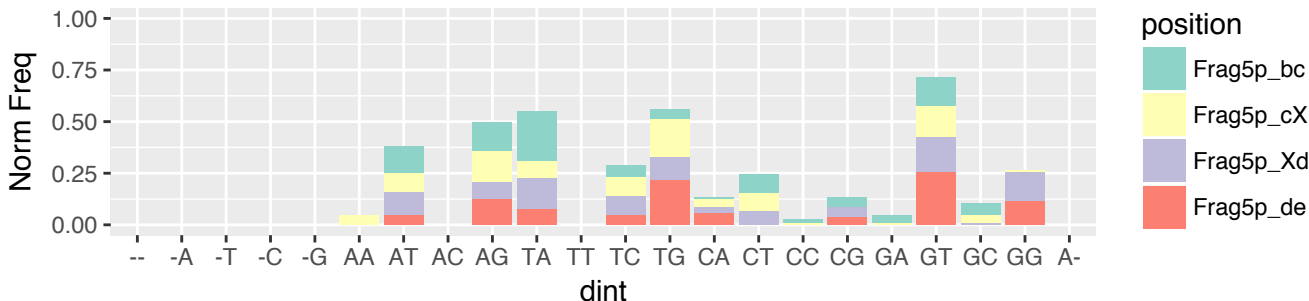

UCEC (n=1208)  
 i-tRF & exclusive (n=260)  
 5' terminus relative to 5' stem of D-loop (n=101)

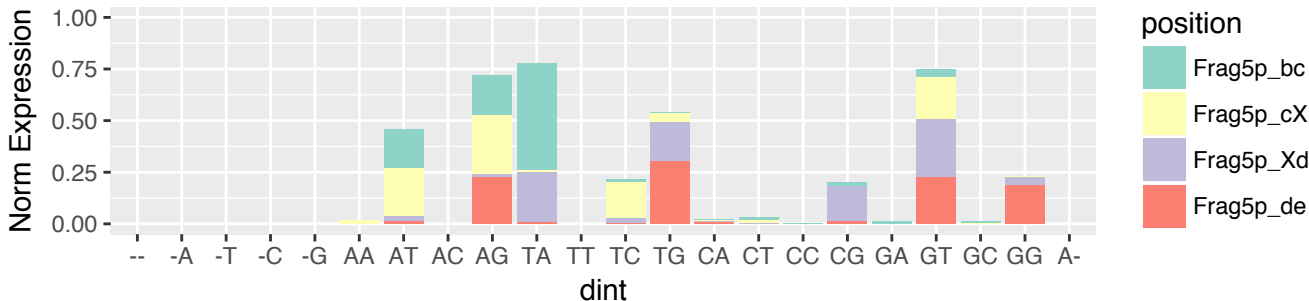

UCEC (n=1208)  
 i-tRF & exclusive (n=260)  
 5' terminus relative to 3' stem of D-loop (n=9)

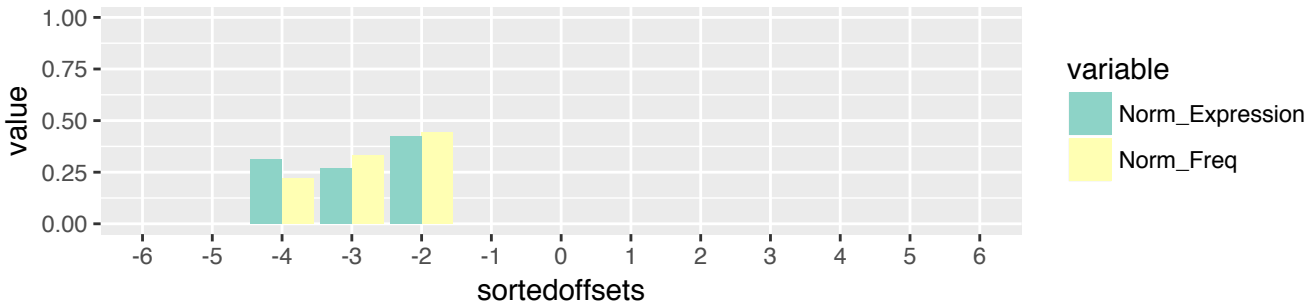

UCEC (n=1208)  
 i-tRF & exclusive (n=260)  
 5' terminus relative to 3' stem of D-loop (n=9)

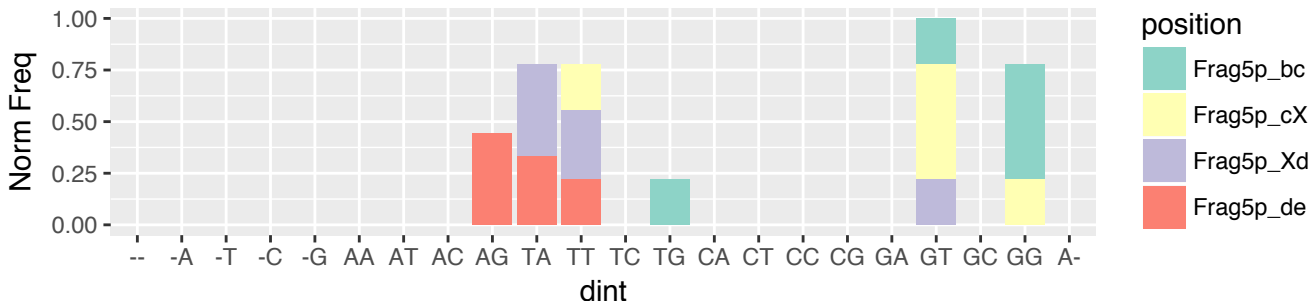

UCEC (n=1208)  
 i-tRF & exclusive (n=260)  
 5' terminus relative to 3' stem of D-loop (n=9)

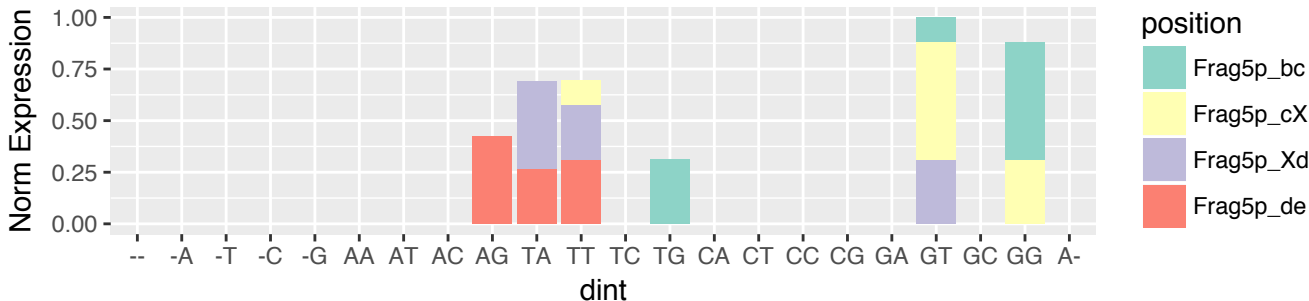

UCEC (n=1208)  
i-tRF & exclusive (n=260)  
5' terminus relative to 5' stem of A-loop (n=45)

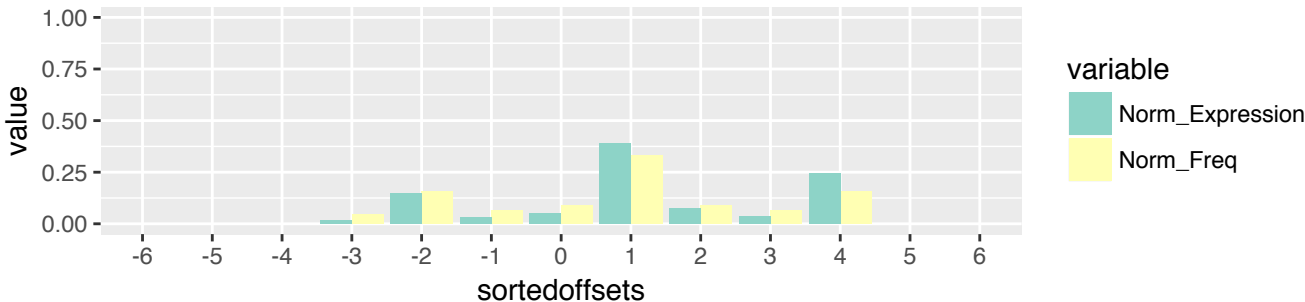

UCEC (n=1208)  
i-tRF & exclusive (n=260)  
5' terminus relative to 5' stem of A-loop (n=45)

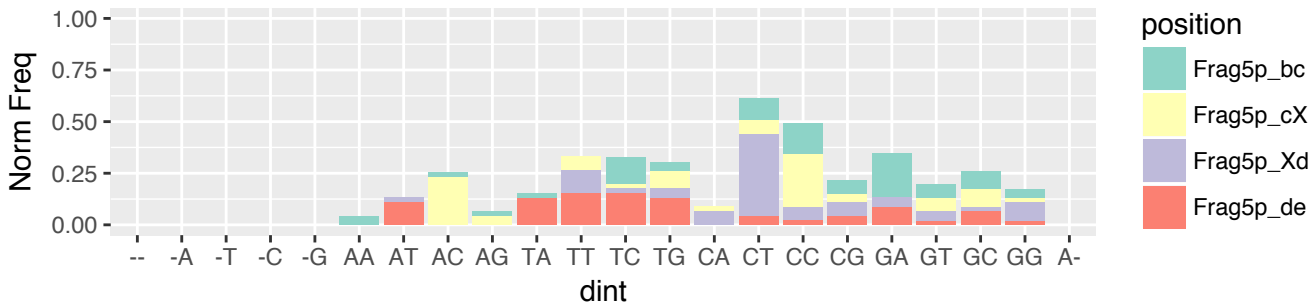

UCEC (n=1208)  
i-tRF & exclusive (n=260)  
5' terminus relative to 5' stem of A-loop (n=45)

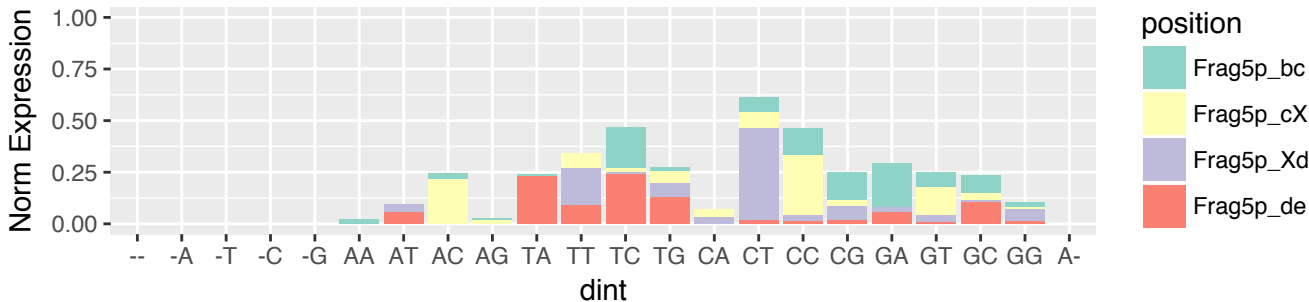

UCEC (n=1208)  
i-tRF & exclusive (n=260)  
5' terminus relative to 3' stem of A-loop (n=65)

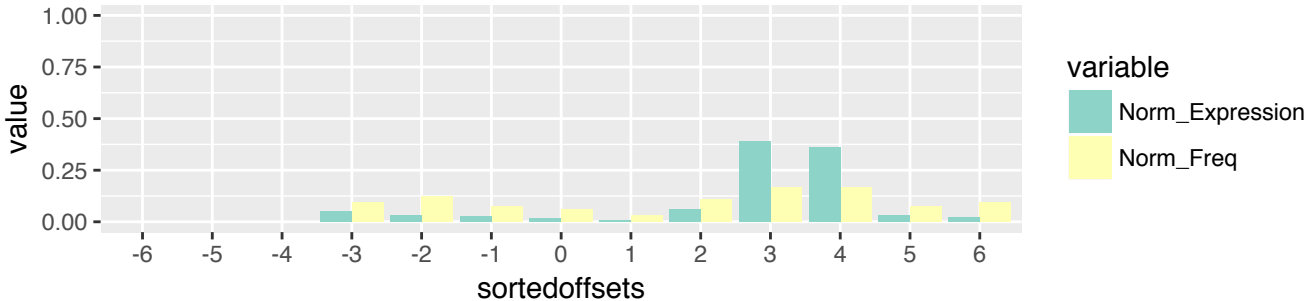

UCEC (n=1208)  
i-tRF & exclusive (n=260)  
5' terminus relative to 3' stem of A-loop (n=65)

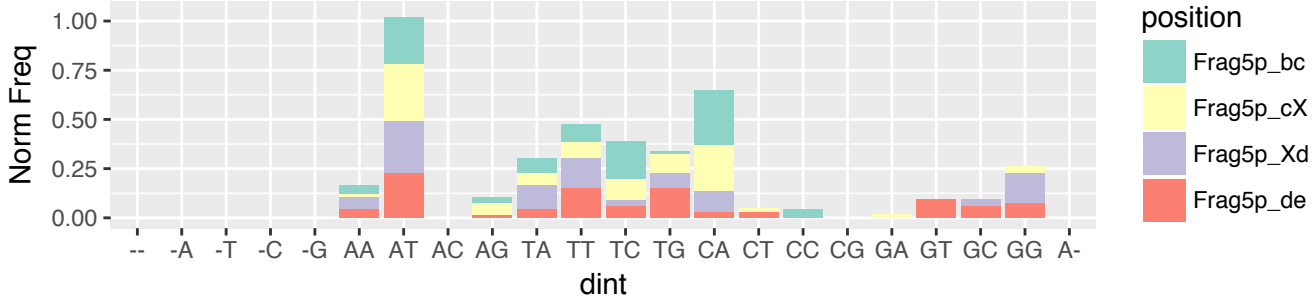

UCEC (n=1208)  
i-tRF & exclusive (n=260)  
5' terminus relative to 3' stem of A-loop (n=65)

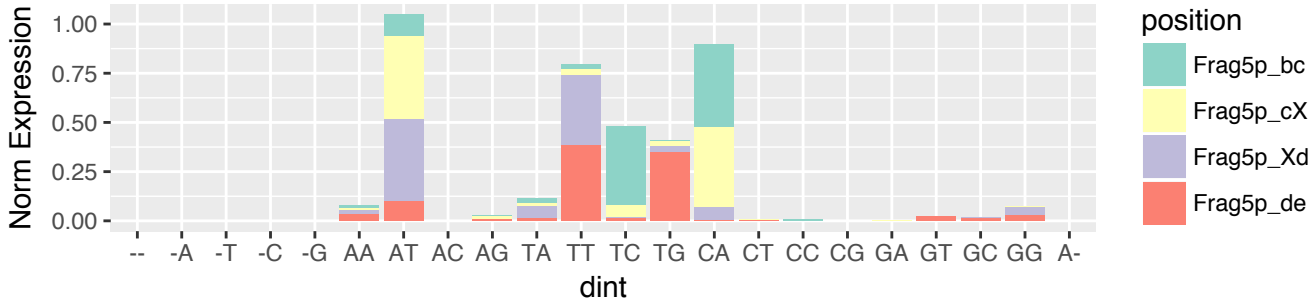

UCEC (n=1208)  
i-tRF & exclusive (n=260)  
5' terminus relative to 5' stem of T-loop (n=25)

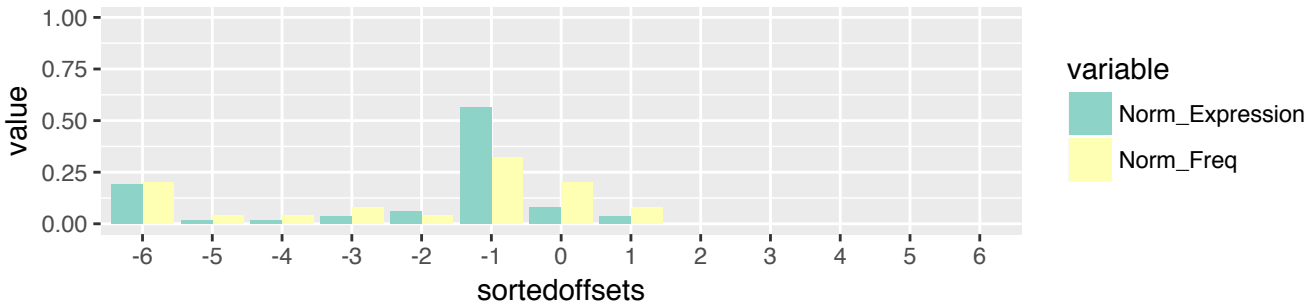

UCEC (n=1208)  
i-tRF & exclusive (n=260)  
5' terminus relative to 5' stem of T-loop (n=25)

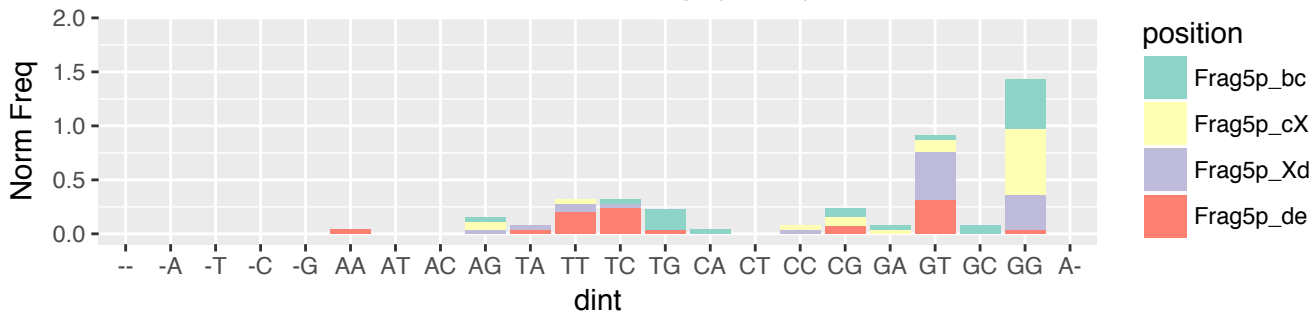

UCEC (n=1208)  
i-tRF & exclusive (n=260)  
5' terminus relative to 5' stem of T-loop (n=25)

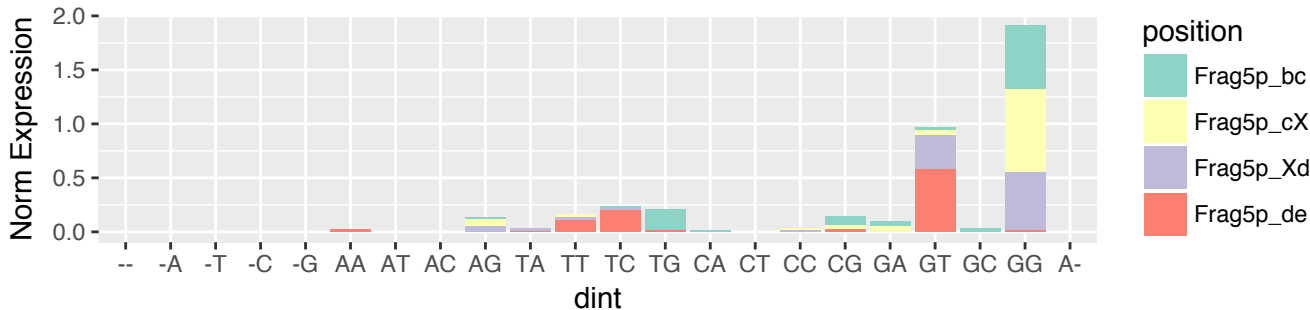

UCEC (n=1208)  
 i-tRF & exclusive (n=260)  
 3' terminus relative to 3' stem of D-loop (n=7)

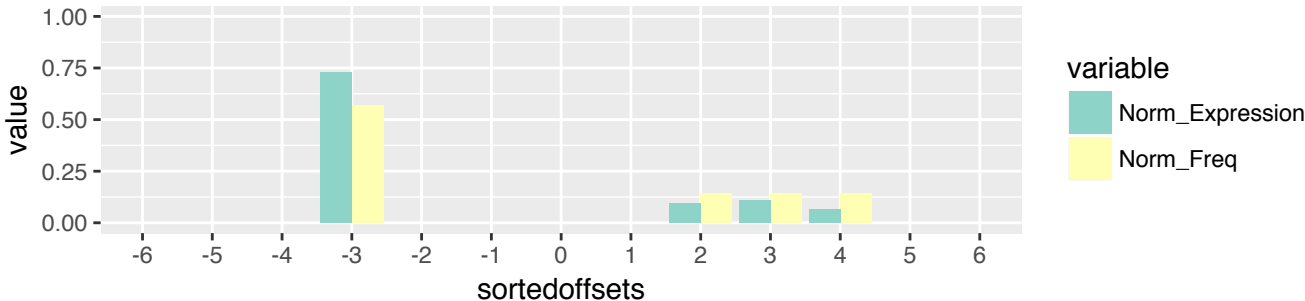

UCEC (n=1208)  
 i-tRF & exclusive (n=260)  
 3' terminus relative to 3' stem of D-loop (n=7)

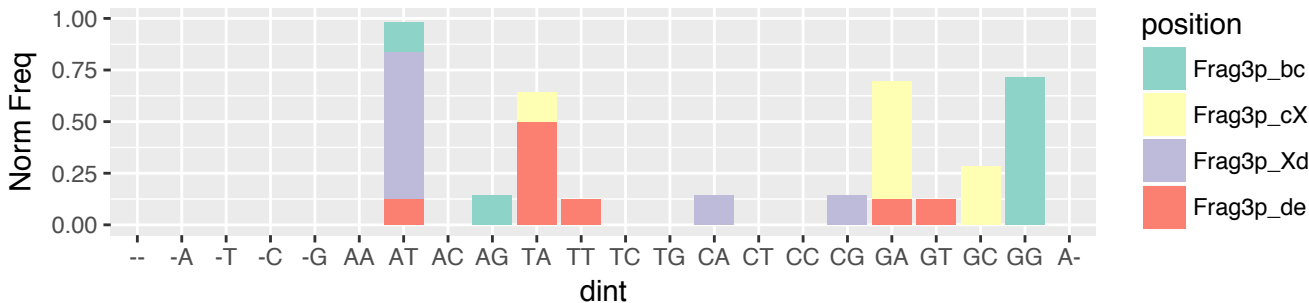

UCEC (n=1208)  
 i-tRF & exclusive (n=260)  
 3' terminus relative to 3' stem of D-loop (n=7)

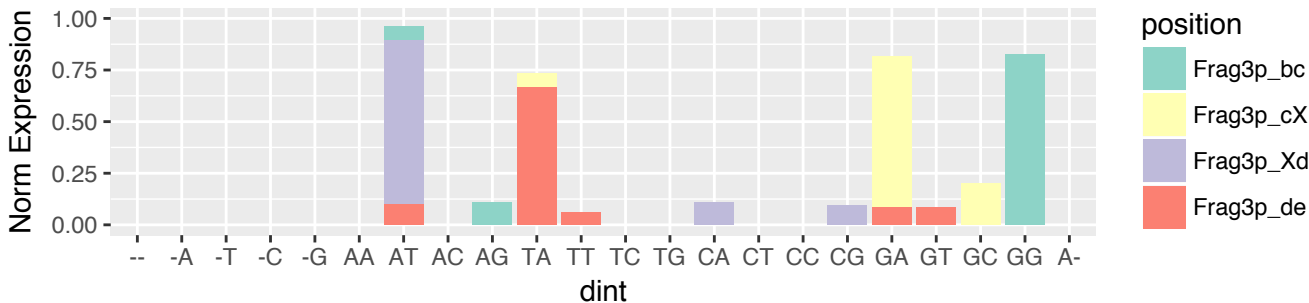

UCEC (n=1208)  
 i-tRF & exclusive (n=260)  
 3' terminus relative to 5' stem of A-loop (n=90)

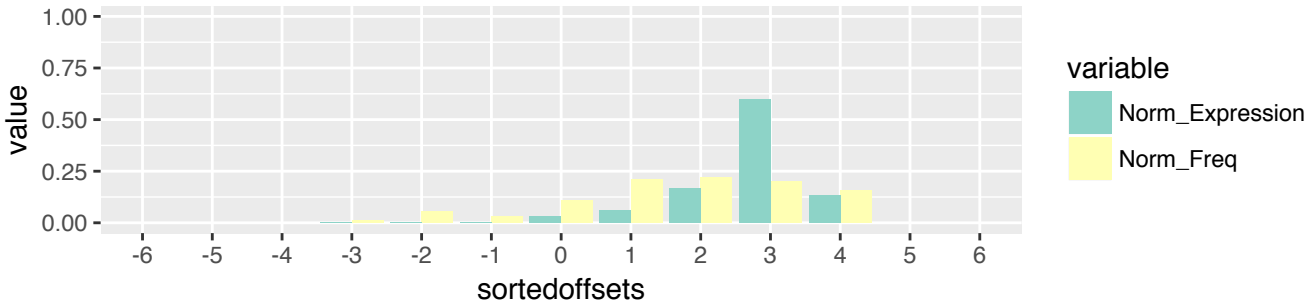

UCEC (n=1208)  
 i-tRF & exclusive (n=260)  
 3' terminus relative to 5' stem of A-loop (n=90)

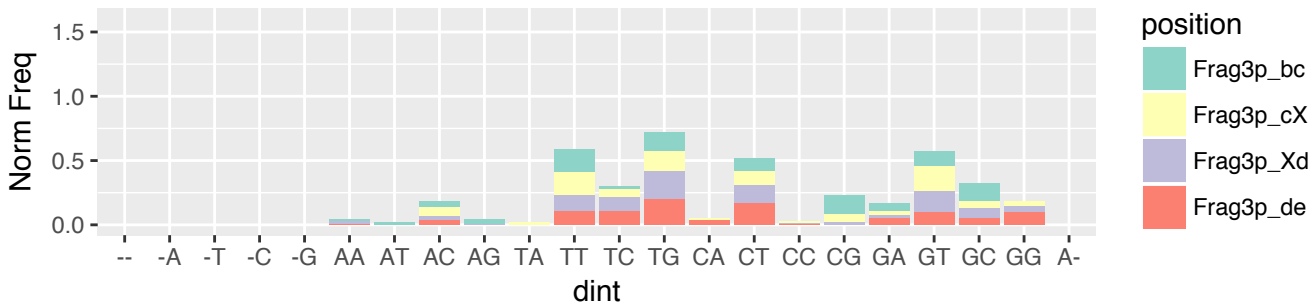

UCEC (n=1208)  
 i-tRF & exclusive (n=260)  
 3' terminus relative to 5' stem of A-loop (n=90)

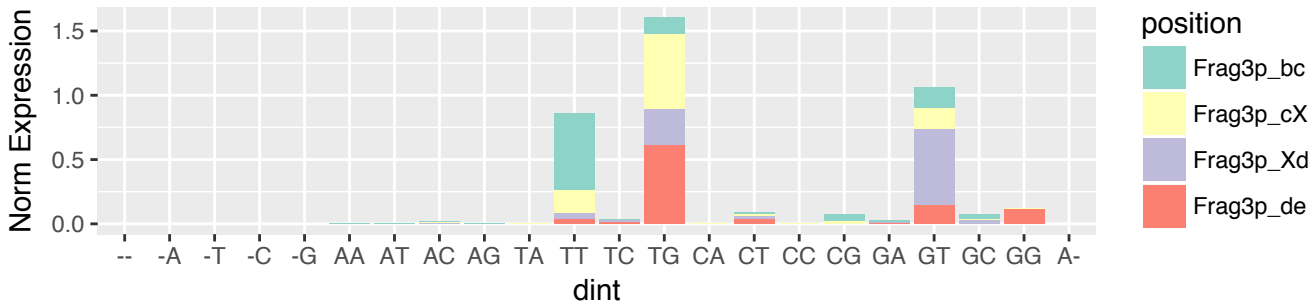

UCEC (n=1208)  
 i-tRF & exclusive (n=260)  
 3' terminus relative to 3' stem of A-loop (n=35)

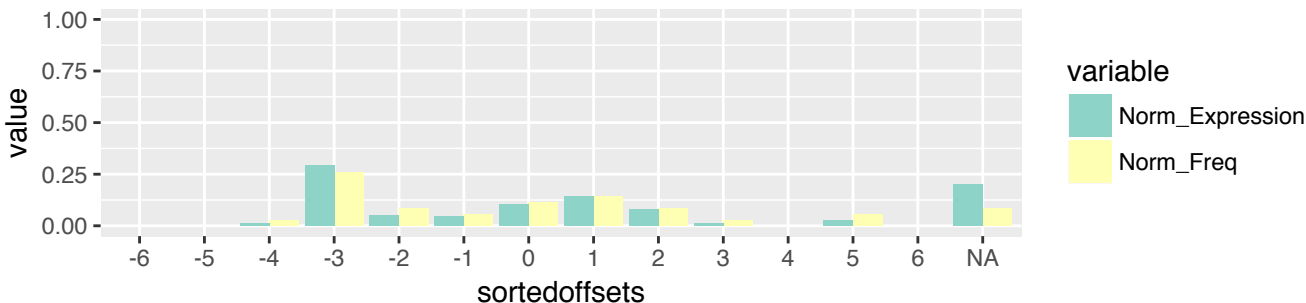

UCEC (n=1208)  
 i-tRF & exclusive (n=260)  
 3' terminus relative to 3' stem of A-loop (n=35)

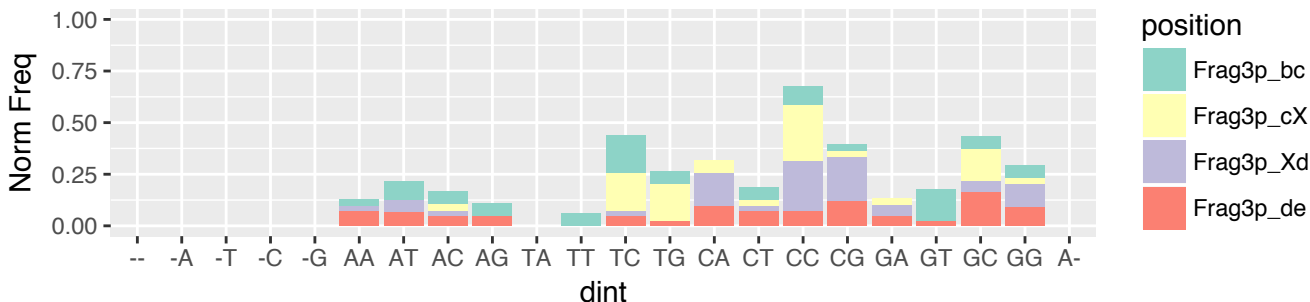

UCEC (n=1208)  
 i-tRF & exclusive (n=260)  
 3' terminus relative to 3' stem of A-loop (n=35)

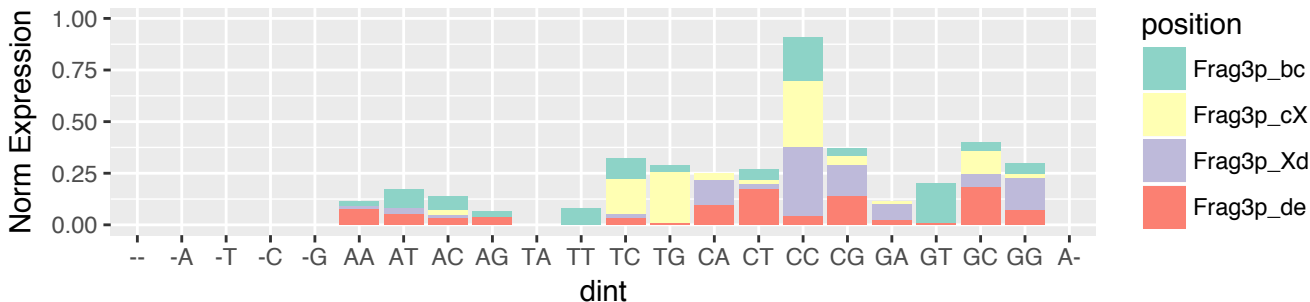



UCEC (n=1208)  
 i-tRF & exclusive (n=260)  
 3' terminus relative to 5' stem of T-loop (n=47)

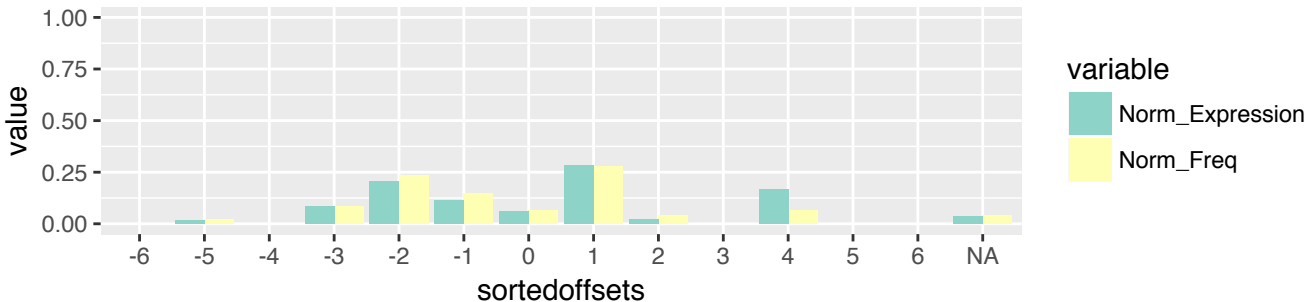

UCEC (n=1208)  
 i-tRF & exclusive (n=260)  
 3' terminus relative to 5' stem of T-loop (n=47)

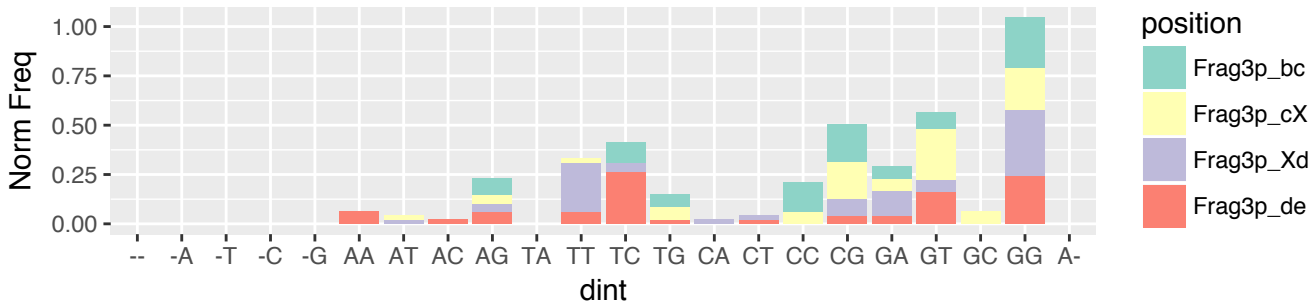

UCEC (n=1208)  
 i-tRF & exclusive (n=260)  
 3' terminus relative to 5' stem of T-loop (n=47)

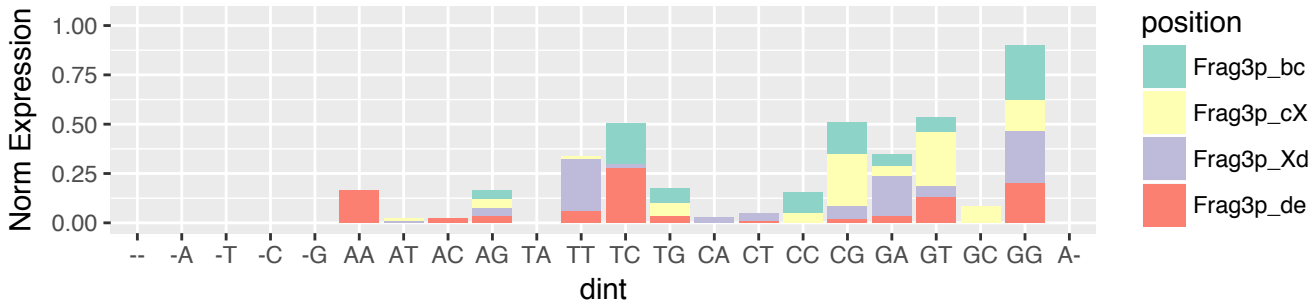

UCEC (n=1208)  
i-tRF & exclusive (n=260)  
3' terminus relative to 3' stem of T-loop (n=54)

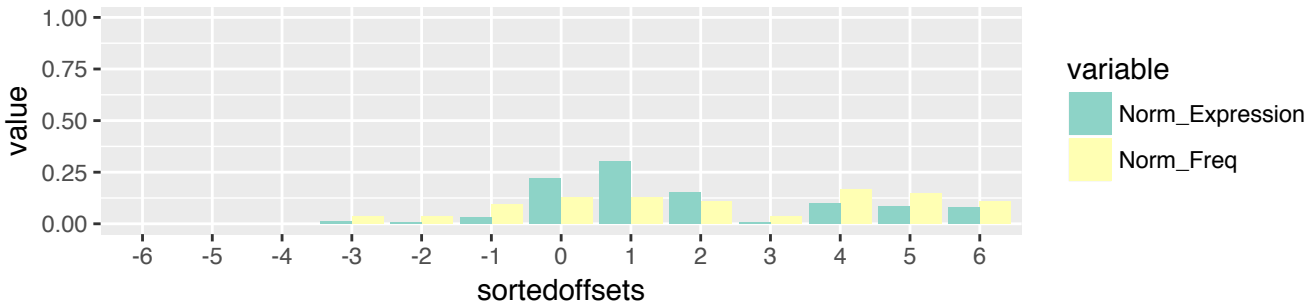

UCEC (n=1208)  
i-tRF & exclusive (n=260)  
3' terminus relative to 3' stem of T-loop (n=54)

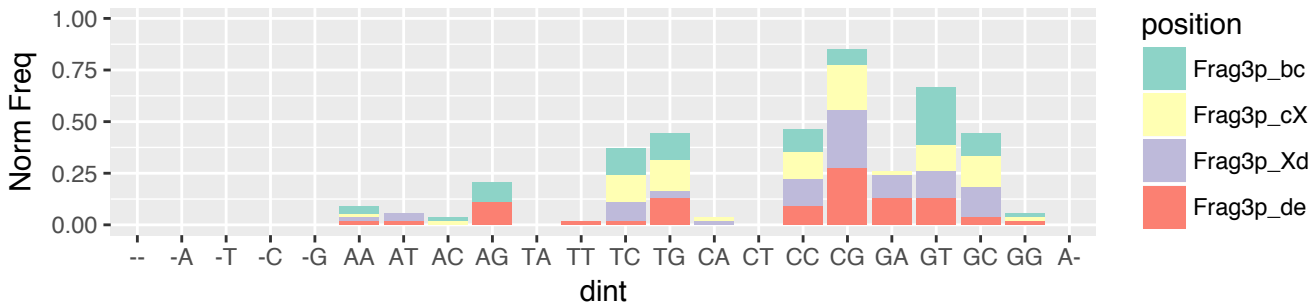

UCEC (n=1208)  
i-tRF & exclusive (n=260)  
3' terminus relative to 3' stem of T-loop (n=54)

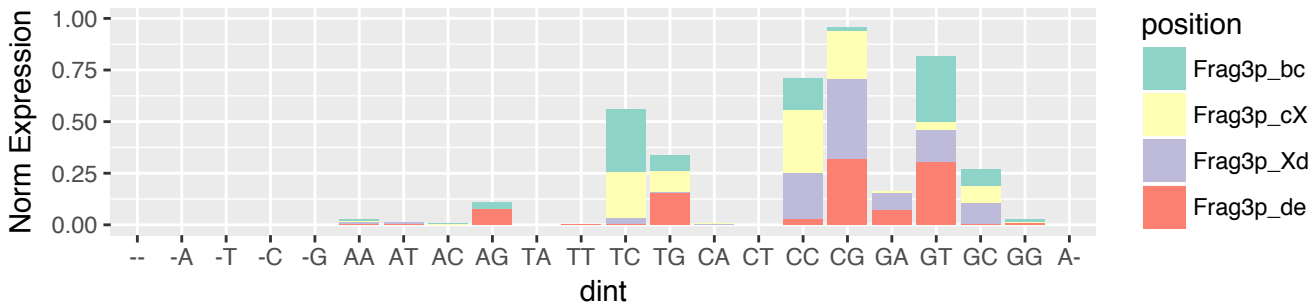

UCEC (n=1208)  
 i-tRF & exclusive (n=260)  
 3' terminus relative to 3' end of the tRNA (n=29)

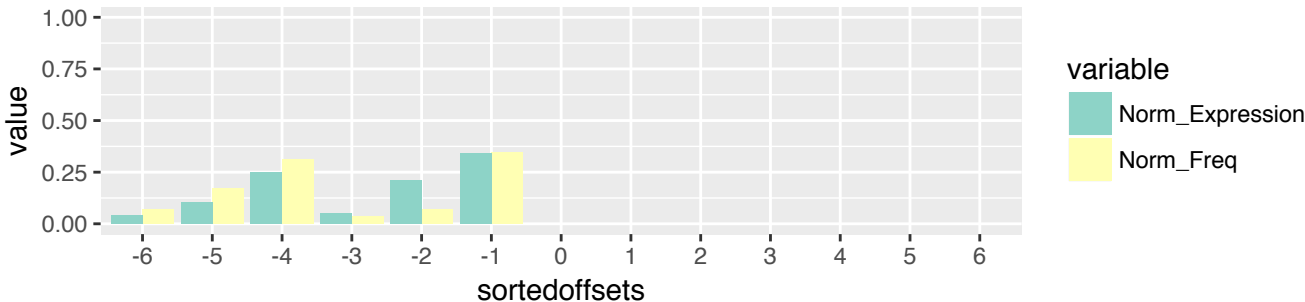

UCEC (n=1208)  
 i-tRF & exclusive (n=260)  
 3' terminus relative to 3' end of the tRNA (n=29)

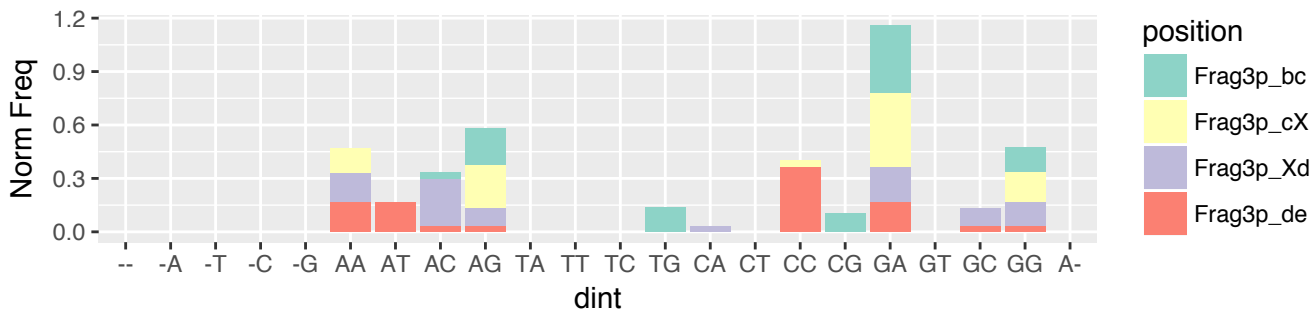

UCEC (n=1208)  
 i-tRF & exclusive (n=260)  
 3' terminus relative to 3' end of the tRNA (n=29)

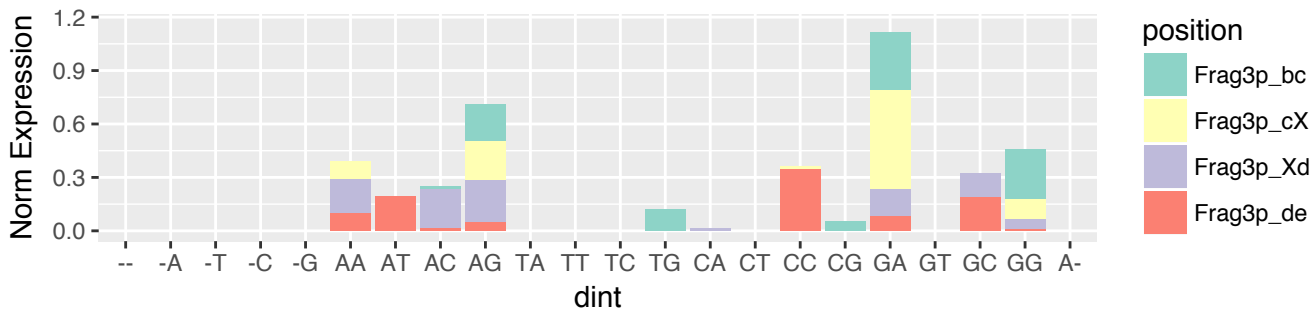

UCEC (n=1208)  
 3'-tRF & exclusive (n=195)  
 5' terminus relative to 5' stem of T-loop (n=130)

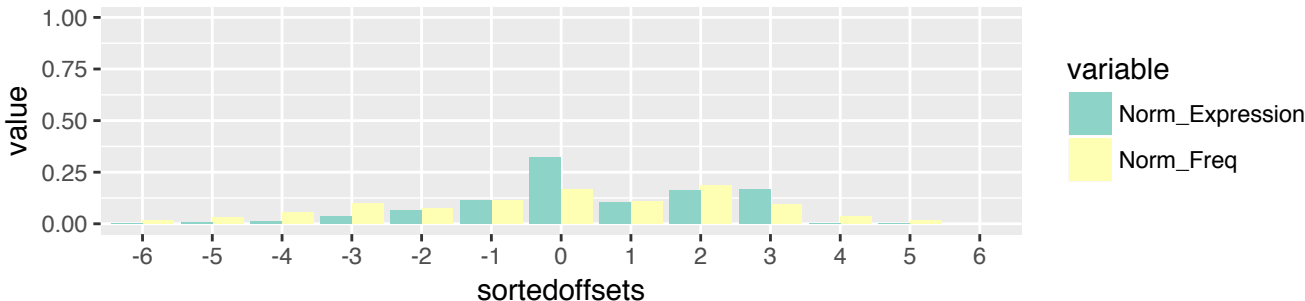

UCEC (n=1208)  
 3'-tRF & exclusive (n=195)  
 5' terminus relative to 5' stem of T-loop (n=130)

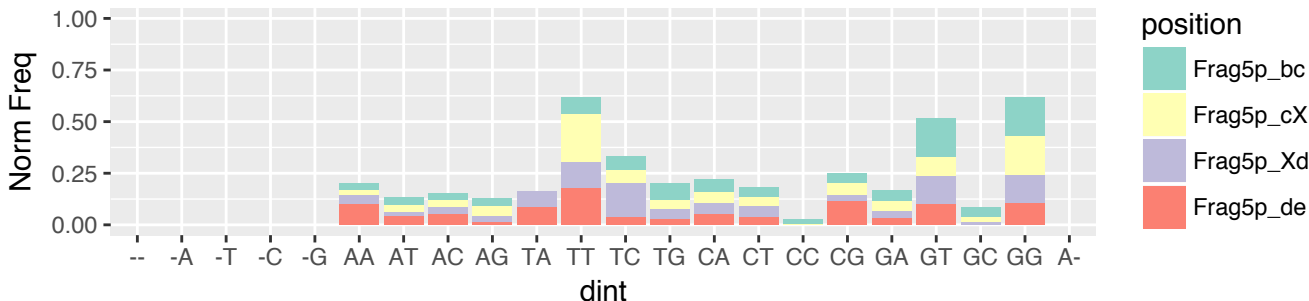

UCEC (n=1208)  
 3'-tRF & exclusive (n=195)  
 5' terminus relative to 5' stem of T-loop (n=130)

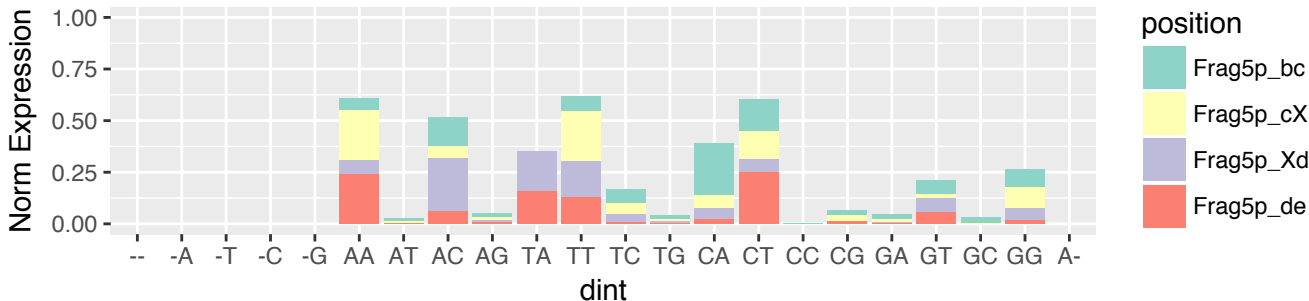

UCEC (n=1208)  
 3'-tRF & exclusive (n=195)  
 5' terminus relative to 3' stem of T-loop (n=66)

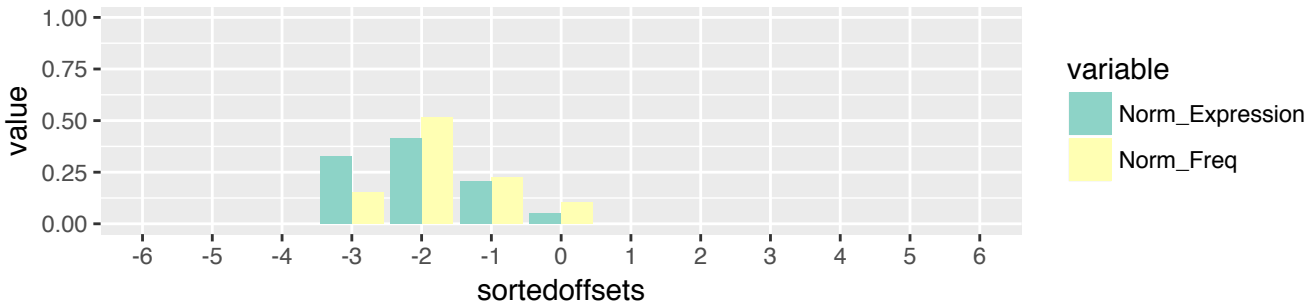

UCEC (n=1208)  
 3'-tRF & exclusive (n=195)  
 5' terminus relative to 3' stem of T-loop (n=66)

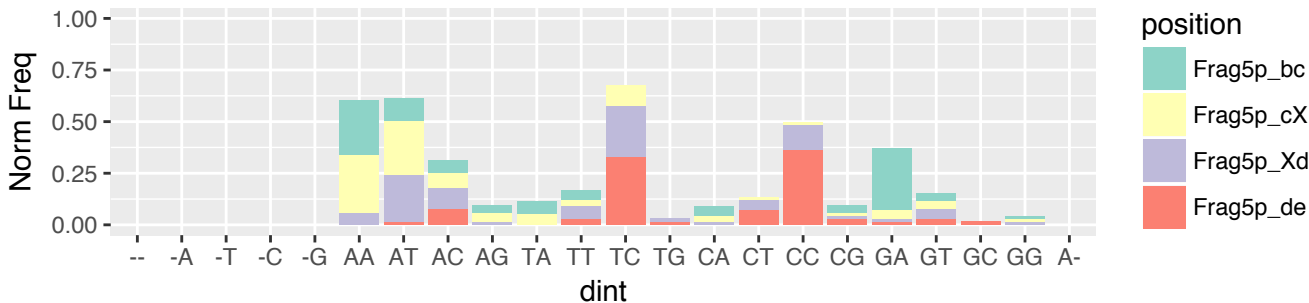

UCEC (n=1208)  
 3'-tRF & exclusive (n=195)  
 5' terminus relative to 3' stem of T-loop (n=66)

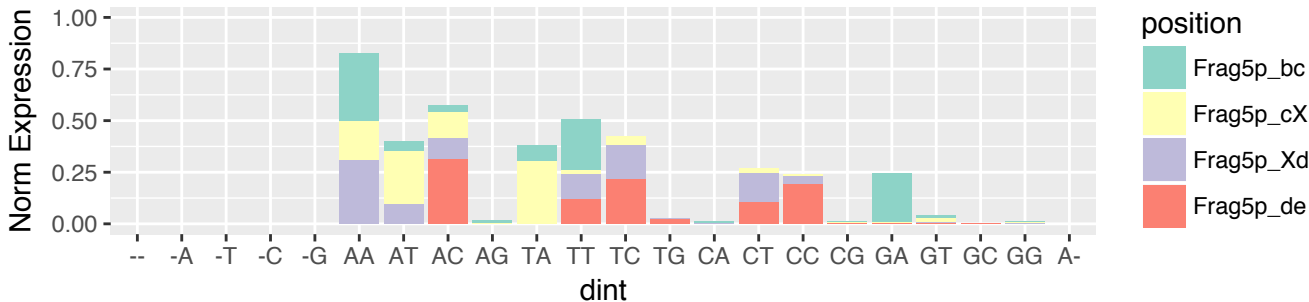

UCEC (n=1208)  
 3'-tRF & exclusive (n=195)  
 3' terminus relative to 3' end of the tRNA (n=195)

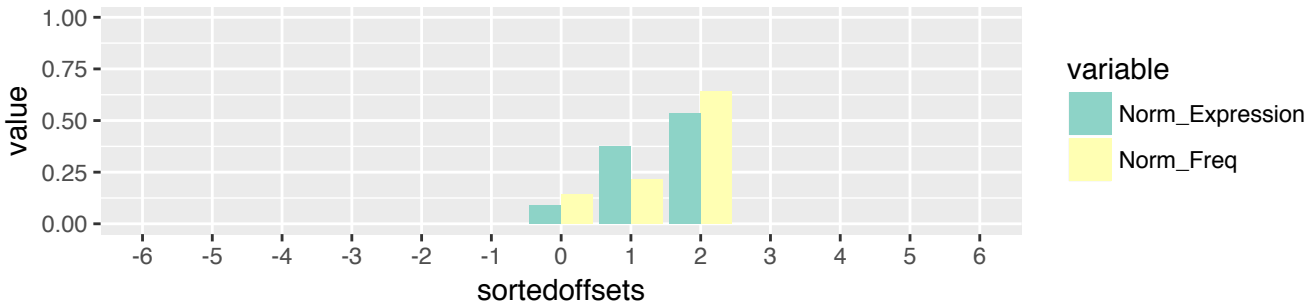

UCEC (n=1208)  
 3'-tRF & exclusive (n=195)  
 3' terminus relative to 3' end of the tRNA (n=195)

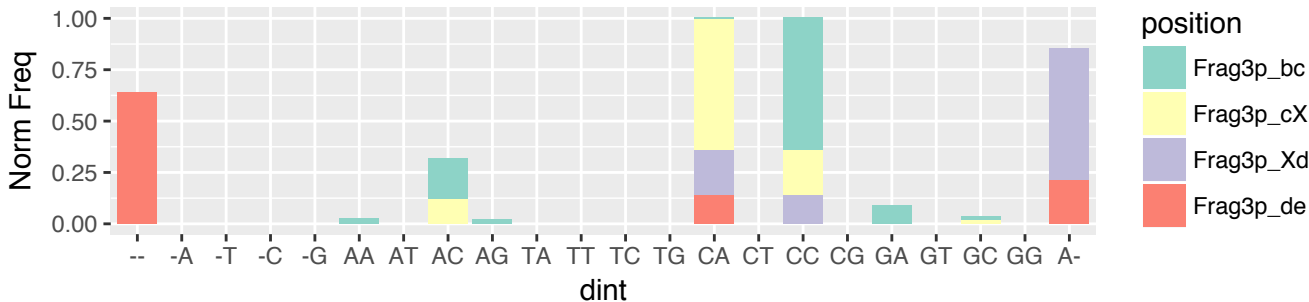

UCEC (n=1208)  
 3'-tRF & exclusive (n=195)  
 3' terminus relative to 3' end of the tRNA (n=195)

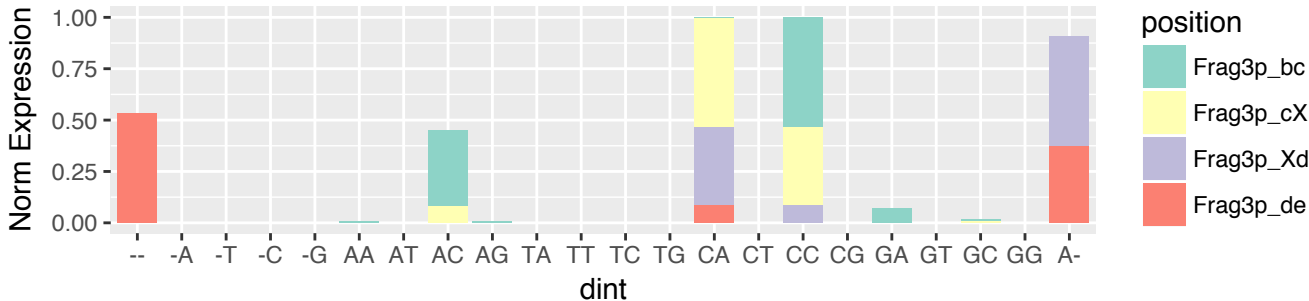

UCS (n=941)  
 5'-half & exclusive (n=2)  
 5' terminus relative to 5' end of the tRNA (n=2)

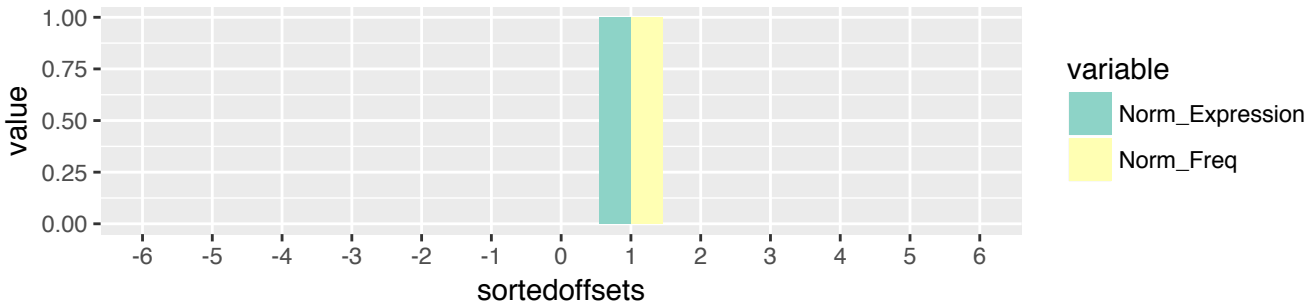

UCS (n=941)  
 5'-half & exclusive (n=2)  
 5' terminus relative to 5' end of the tRNA (n=2)

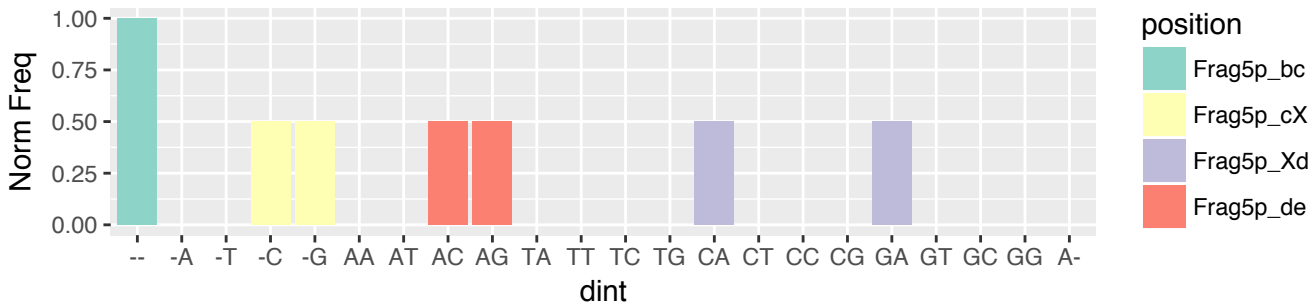

UCS (n=941)  
 5'-half & exclusive (n=2)  
 5' terminus relative to 5' end of the tRNA (n=2)

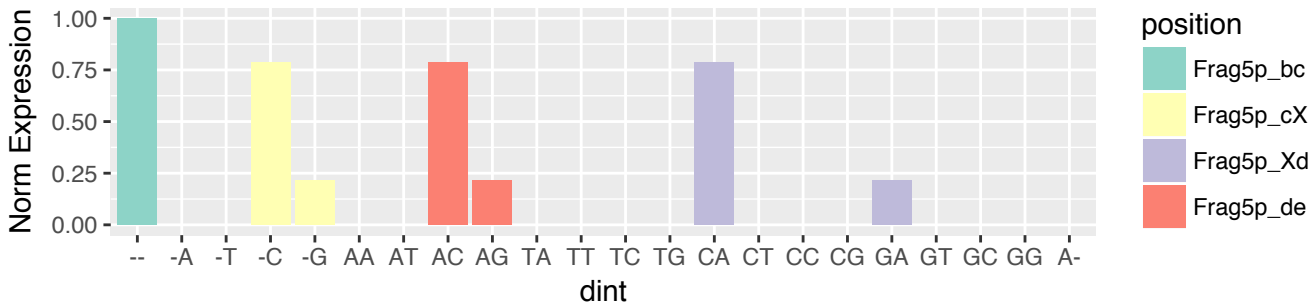

UCS (n=941)  
 5'-half & exclusive (n=2)  
 3' terminus relative to 5' stem of A-loop (n=2)

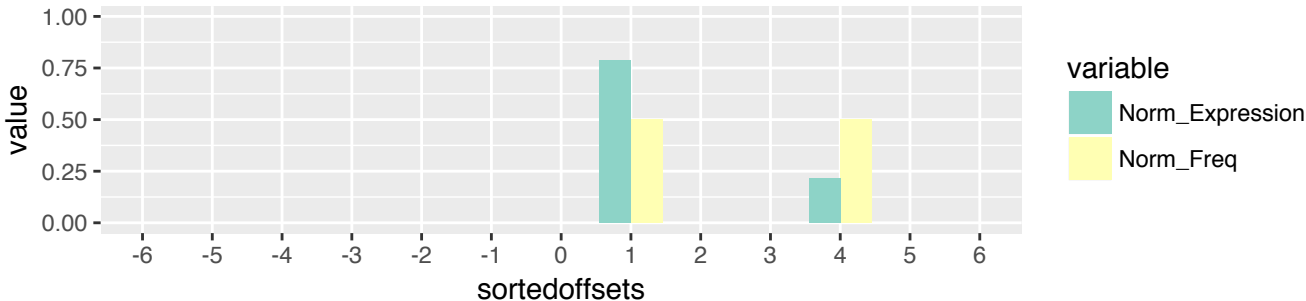

UCS (n=941)  
 5'-half & exclusive (n=2)  
 3' terminus relative to 5' stem of A-loop (n=2)

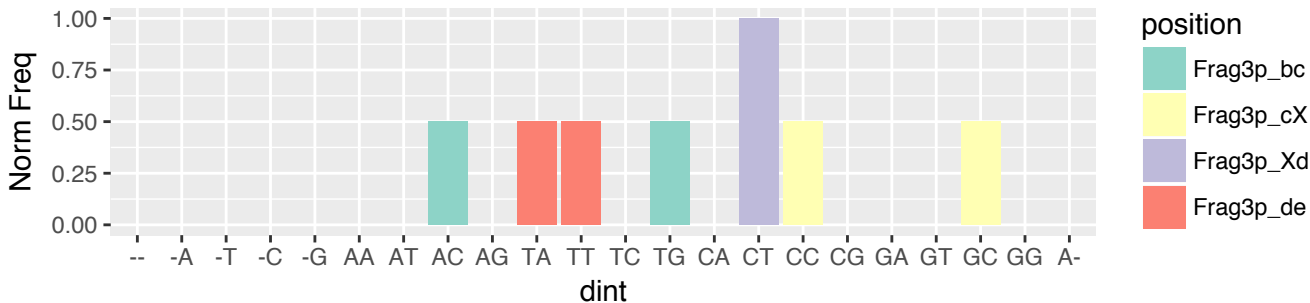

UCS (n=941)  
 5'-half & exclusive (n=2)  
 3' terminus relative to 5' stem of A-loop (n=2)

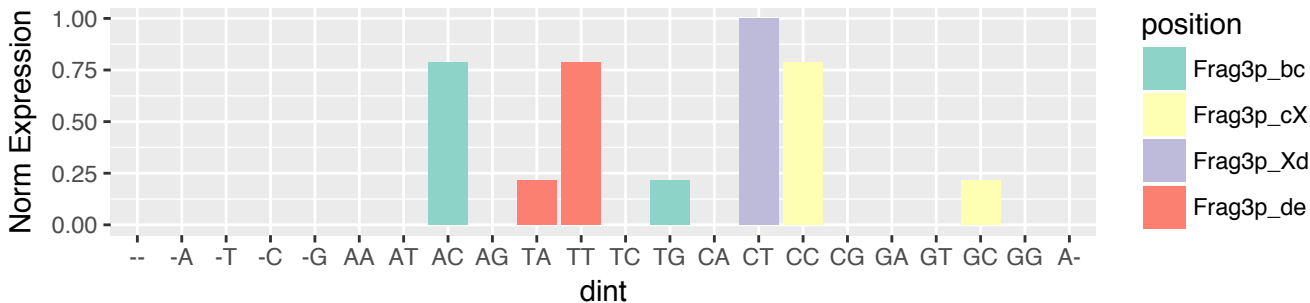



UCS (n=941)  
 5'-tRF & exclusive (n=169)  
 5' terminus relative to 5' end of the tRNA (n=169)

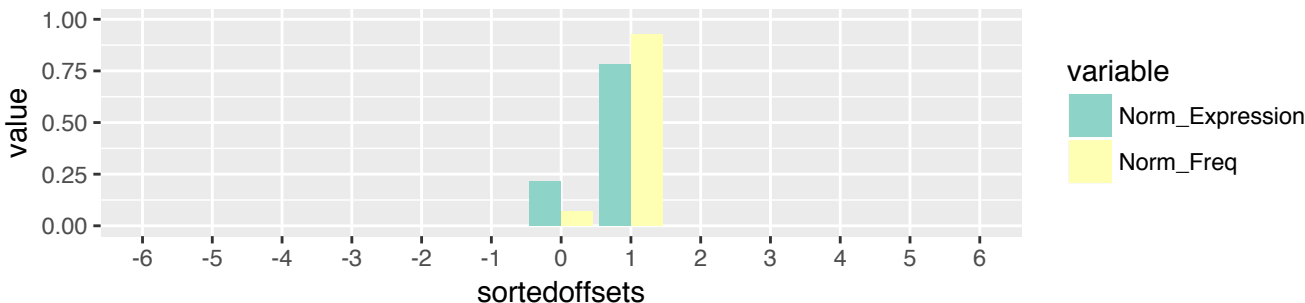

UCS (n=941)  
 5'-tRF & exclusive (n=169)  
 5' terminus relative to 5' end of the tRNA (n=169)

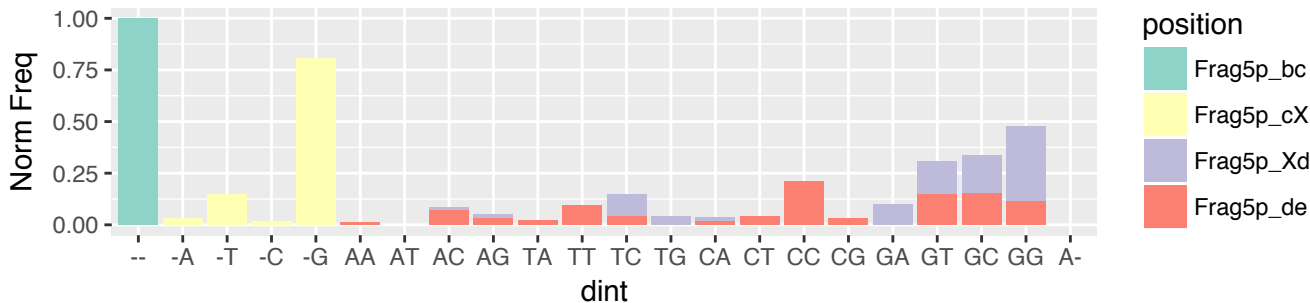

UCS (n=941)  
 5'-tRF & exclusive (n=169)  
 5' terminus relative to 5' end of the tRNA (n=169)

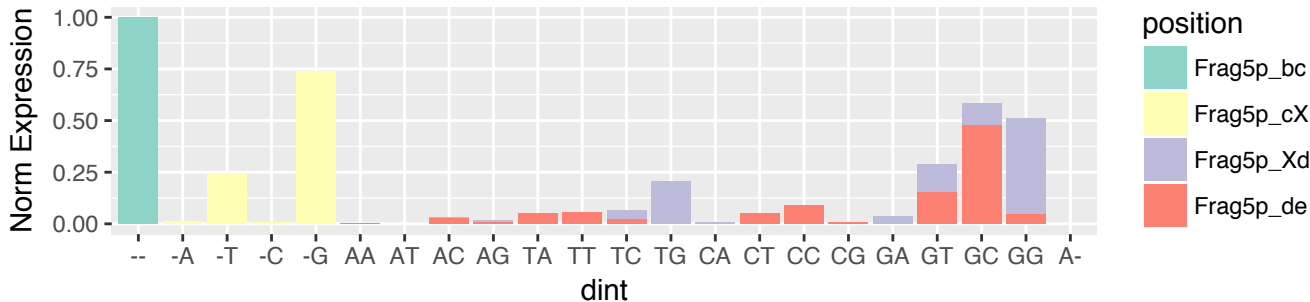

UCS (n=941)  
 5'-tRF & exclusive (n=169)  
 3' terminus relative to 5' stem of D-loop (n=3)

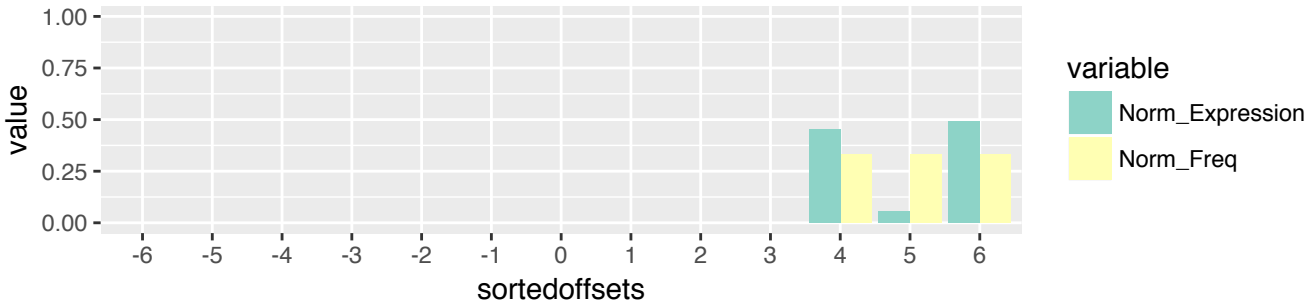

UCS (n=941)  
 5'-tRF & exclusive (n=169)  
 3' terminus relative to 5' stem of D-loop (n=3)

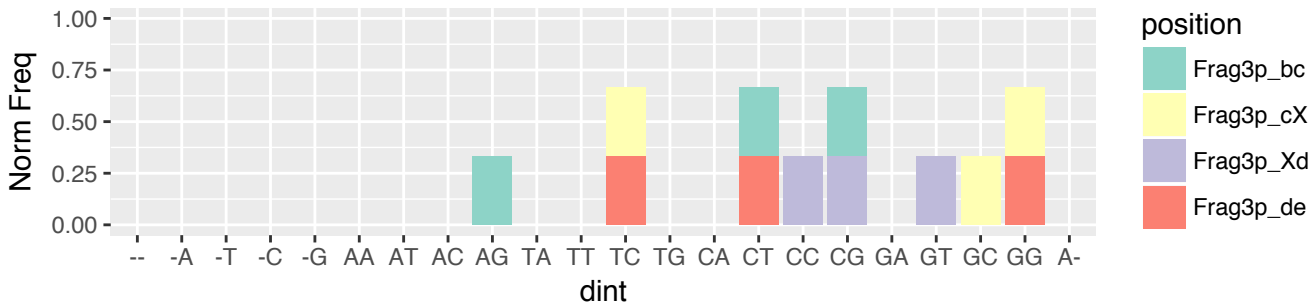

UCS (n=941)  
 5'-tRF & exclusive (n=169)  
 3' terminus relative to 5' stem of D-loop (n=3)

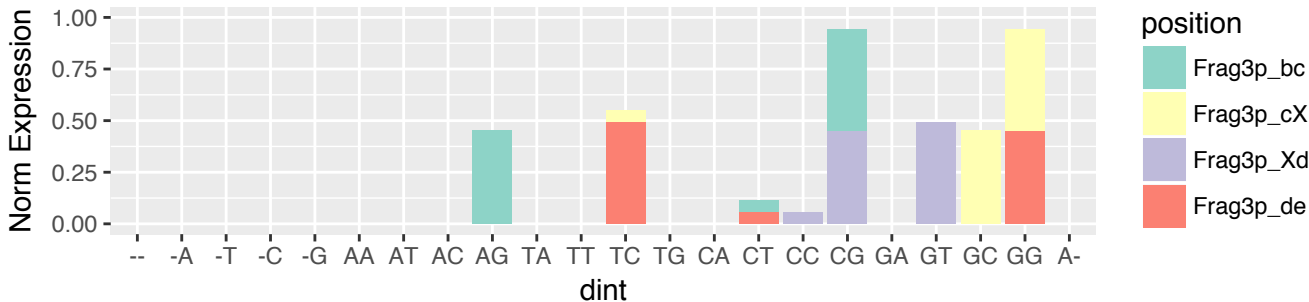

UCS (n=941)  
 5'-tRF & exclusive (n=169)  
 3' terminus relative to 3' stem of D-loop (n=145)

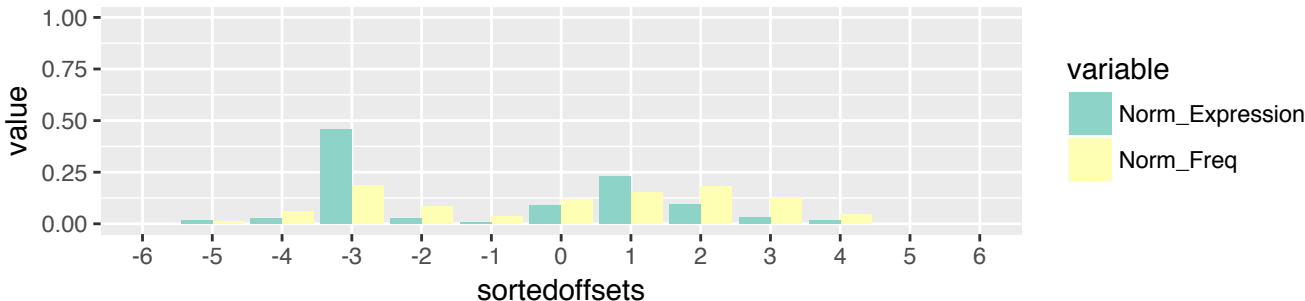

UCS (n=941)  
 5'-tRF & exclusive (n=169)  
 3' terminus relative to 3' stem of D-loop (n=145)

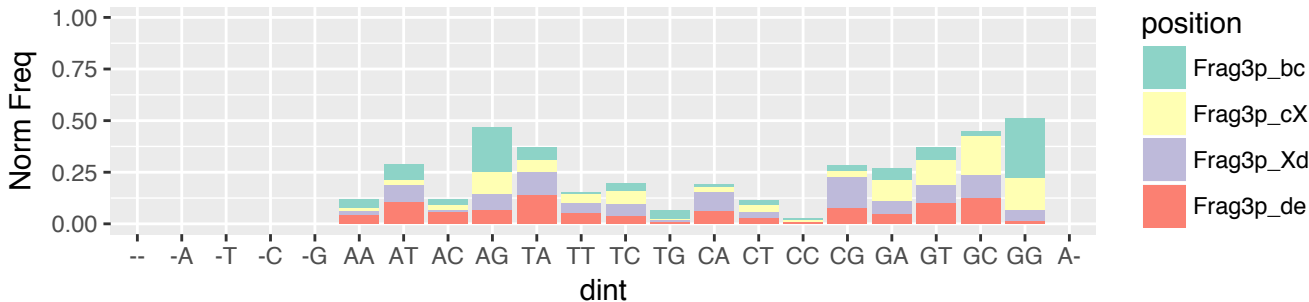

UCS (n=941)  
 5'-tRF & exclusive (n=169)  
 3' terminus relative to 3' stem of D-loop (n=145)

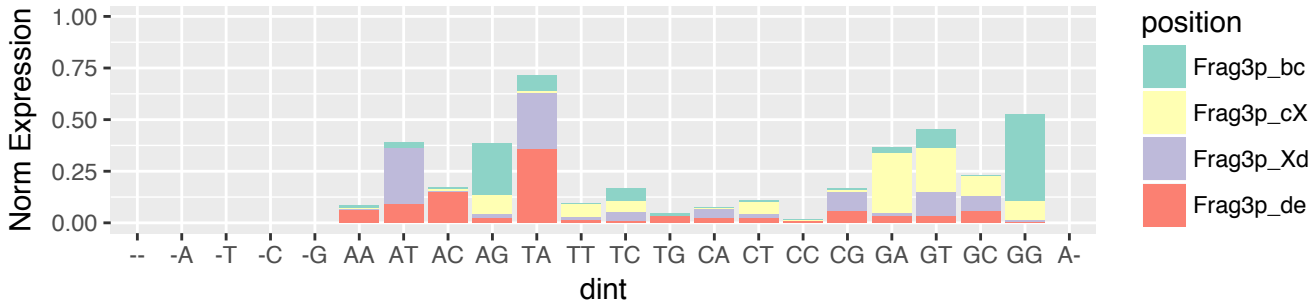

UCS (n=941)  
 5'-tRF & exclusive (n=169)  
 3' terminus relative to 5' stem of A-loop (n=15)

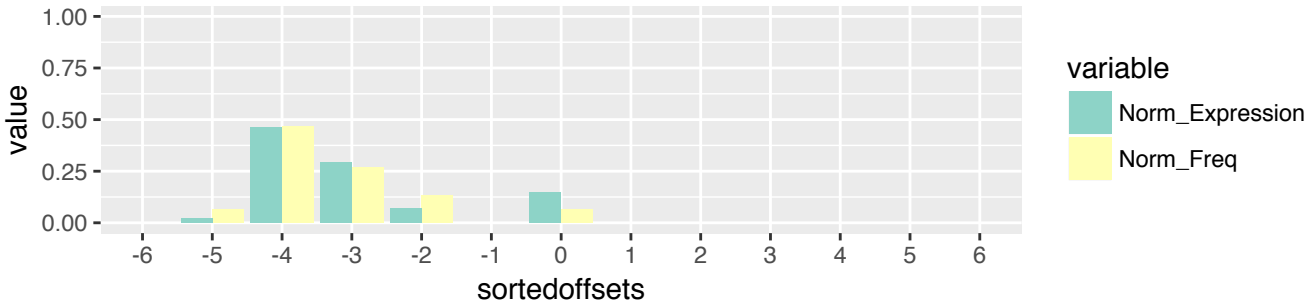

UCS (n=941)  
 5'-tRF & exclusive (n=169)  
 3' terminus relative to 5' stem of A-loop (n=15)

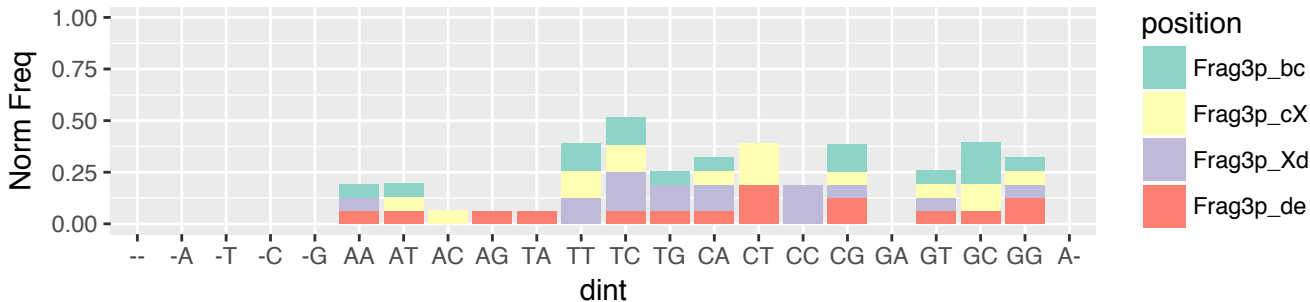

UCS (n=941)  
 5'-tRF & exclusive (n=169)  
 3' terminus relative to 5' stem of A-loop (n=15)

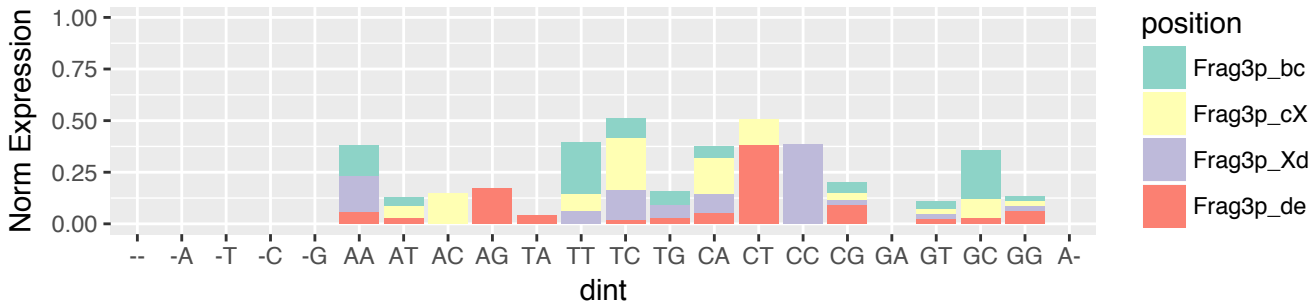

UCS (n=941)  
 5'-tRF & exclusive (n=169)  
 3' terminus relative to 3' stem of A-loop (n=6)

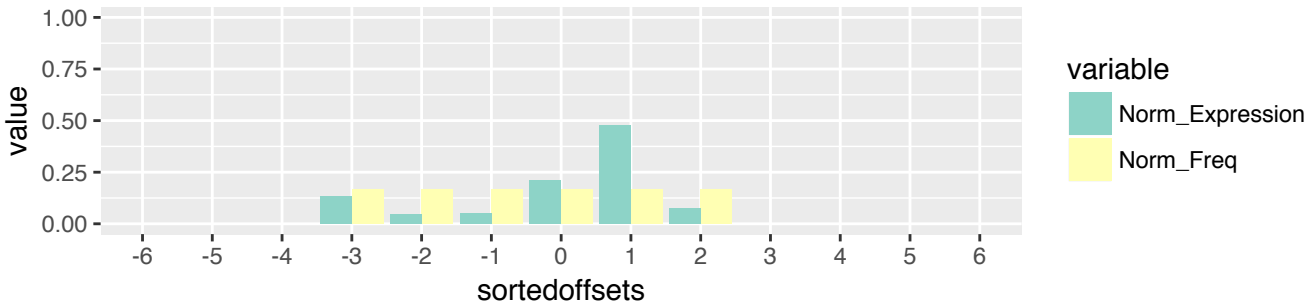

UCS (n=941)  
 5'-tRF & exclusive (n=169)  
 3' terminus relative to 3' stem of A-loop (n=6)

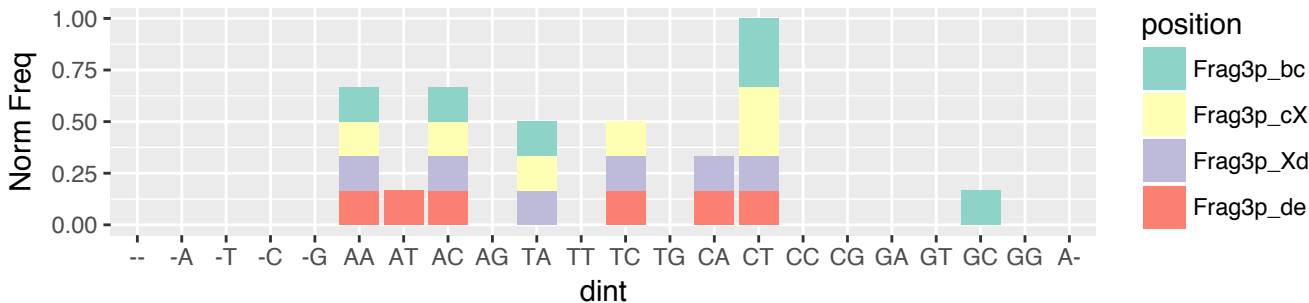

UCS (n=941)  
 5'-tRF & exclusive (n=169)  
 3' terminus relative to 3' stem of A-loop (n=6)

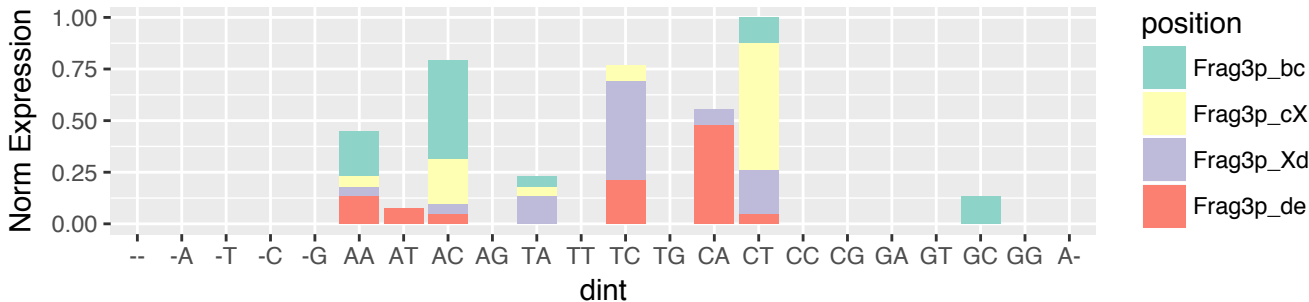

UCS (n=941)  
 i-tRF & exclusive (n=246)  
 5' terminus relative to 5' end of the tRNA (n=15)

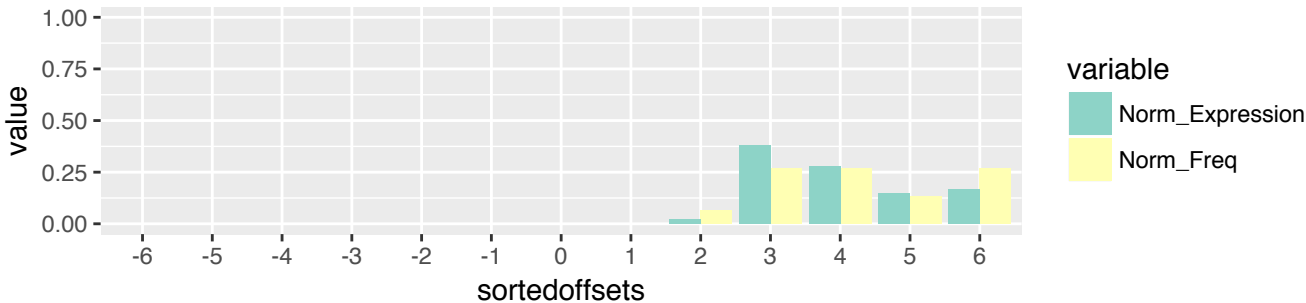

UCS (n=941)  
 i-tRF & exclusive (n=246)  
 5' terminus relative to 5' end of the tRNA (n=15)

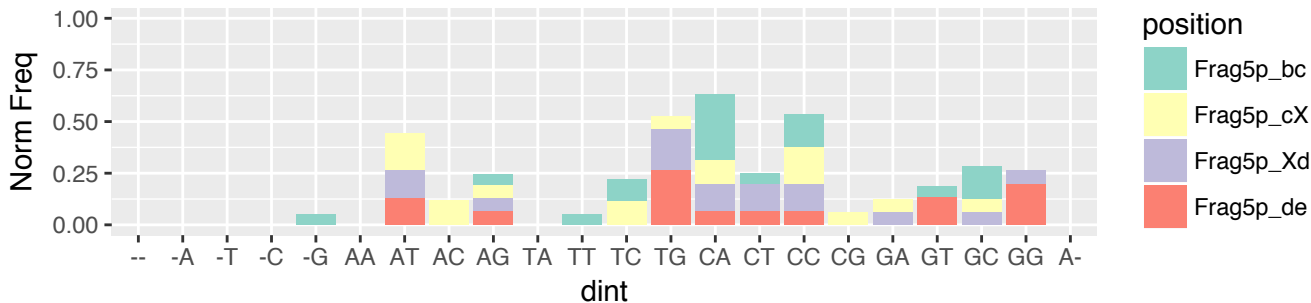

UCS (n=941)  
 i-tRF & exclusive (n=246)  
 5' terminus relative to 5' end of the tRNA (n=15)

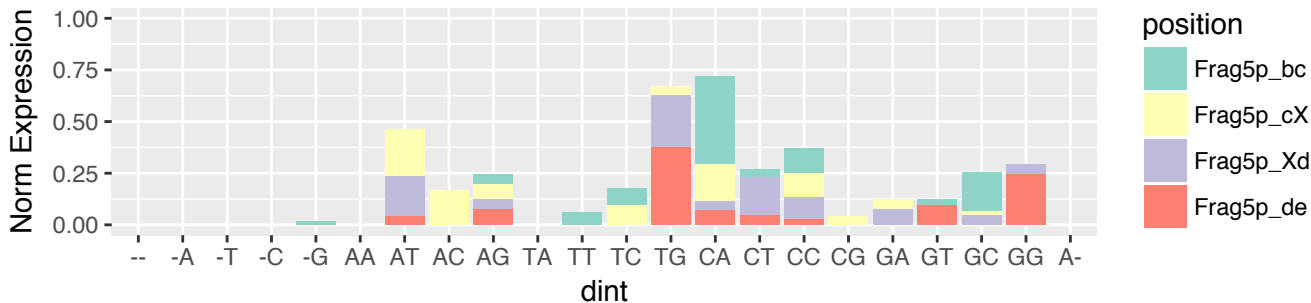

UCS (n=941)  
 i-tRF & exclusive (n=246)  
 5' terminus relative to 5' stem of D-loop (n=83)

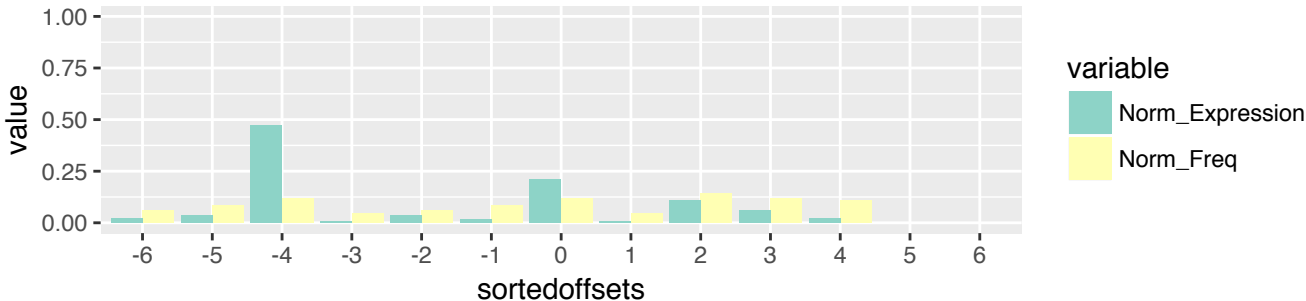

UCS (n=941)  
 i-tRF & exclusive (n=246)  
 5' terminus relative to 5' stem of D-loop (n=83)

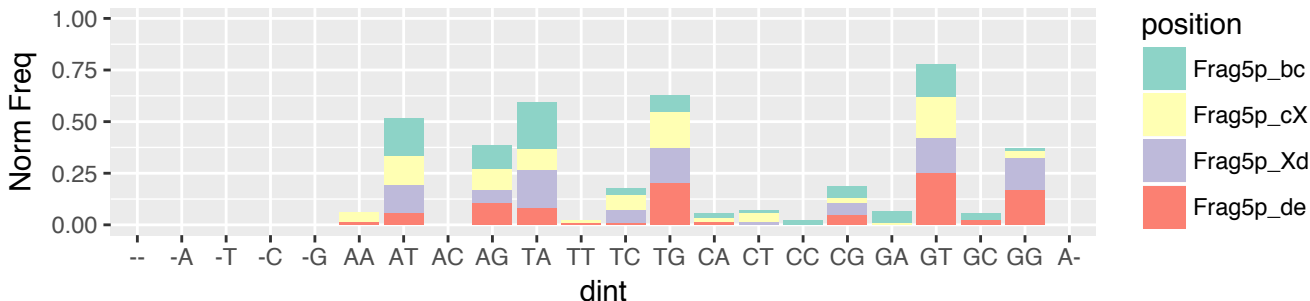

UCS (n=941)  
 i-tRF & exclusive (n=246)  
 5' terminus relative to 5' stem of D-loop (n=83)

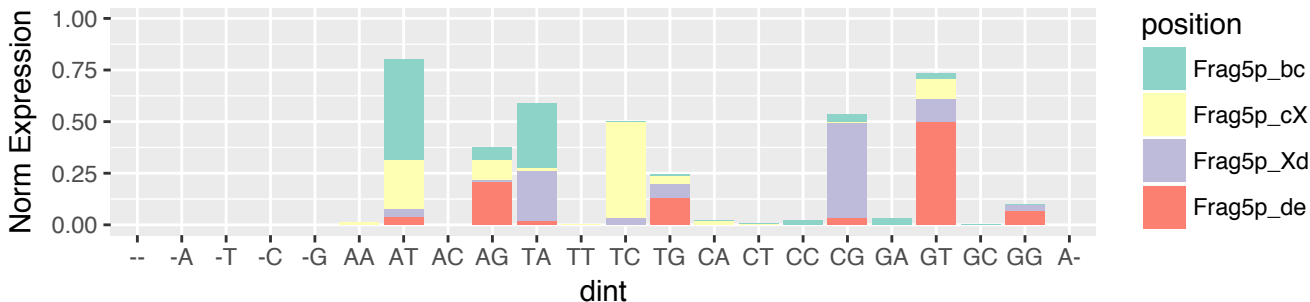

UCS (n=941)  
 i-tRF & exclusive (n=246)  
 5' terminus relative to 3' stem of D-loop (n=12)

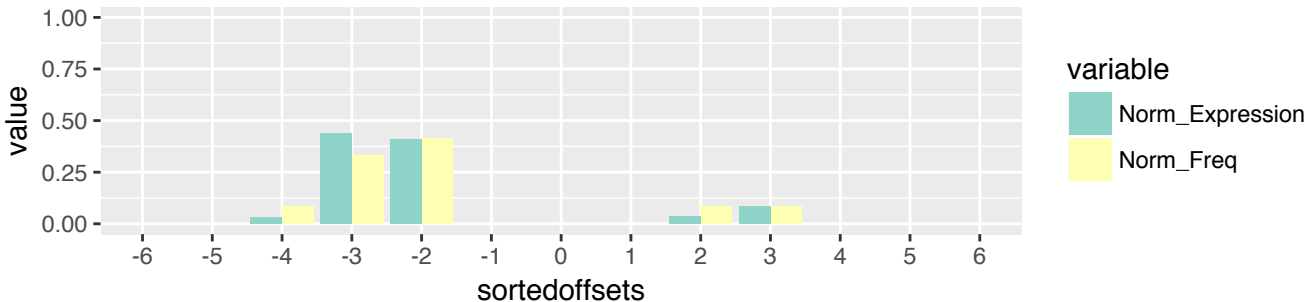

UCS (n=941)  
 i-tRF & exclusive (n=246)  
 5' terminus relative to 3' stem of D-loop (n=12)

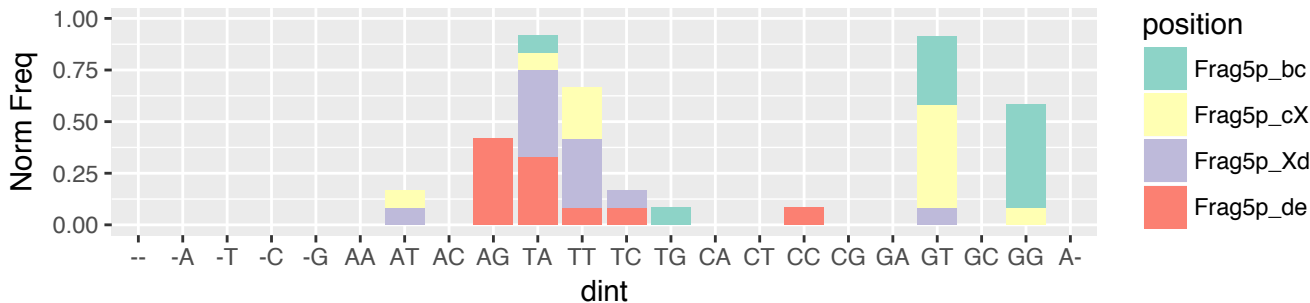

UCS (n=941)  
 i-tRF & exclusive (n=246)  
 5' terminus relative to 3' stem of D-loop (n=12)

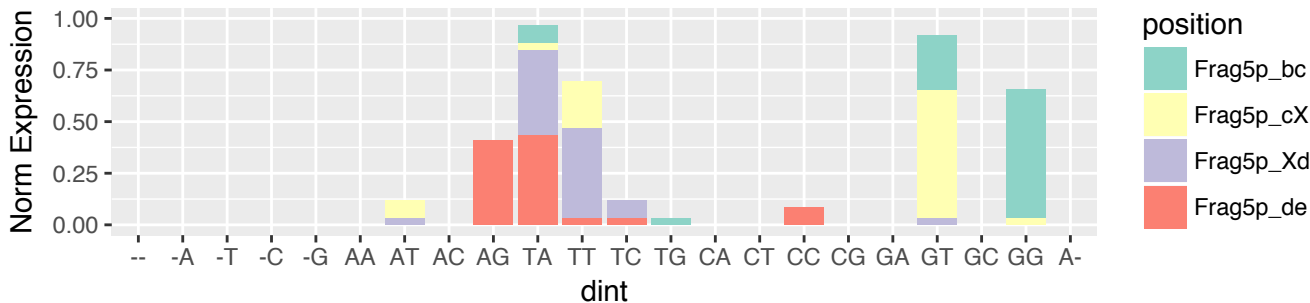



UCS (n=941)  
 i-tRF & exclusive (n=246)  
 5' terminus relative to 5' stem of A-loop (n=46)

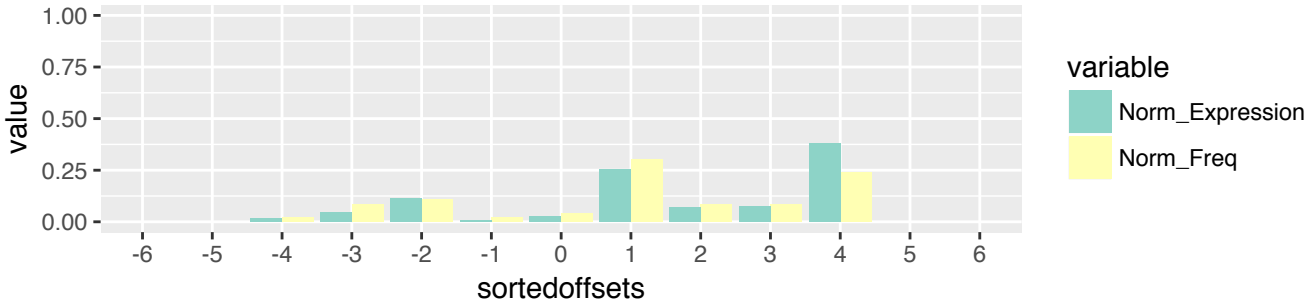

UCS (n=941)  
 i-tRF & exclusive (n=246)  
 5' terminus relative to 5' stem of A-loop (n=46)

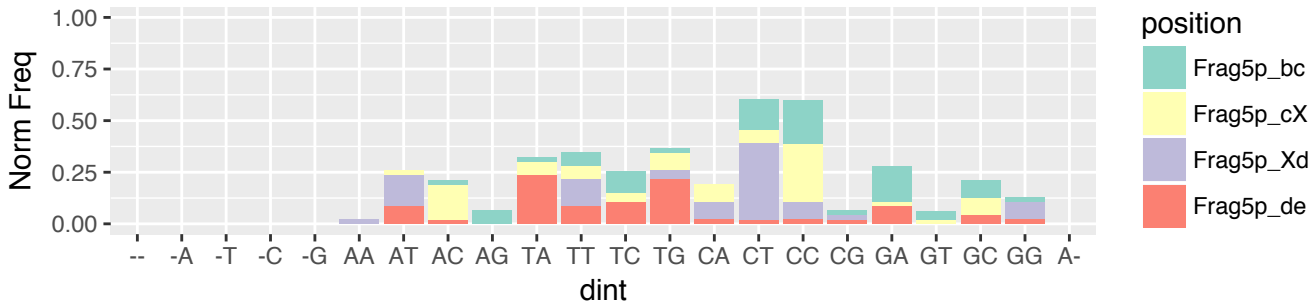

UCS (n=941)  
 i-tRF & exclusive (n=246)  
 5' terminus relative to 5' stem of A-loop (n=46)

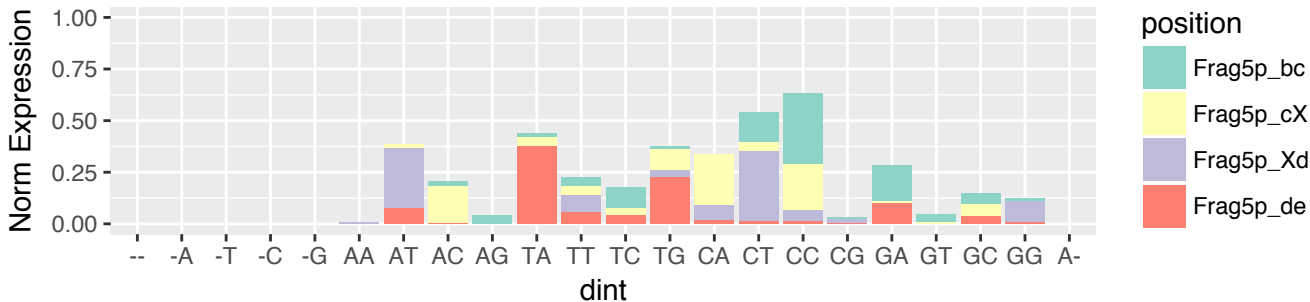

UCS (n=941)  
i-tRF & exclusive (n=246)  
5' terminus relative to 3' stem of A-loop (n=76)

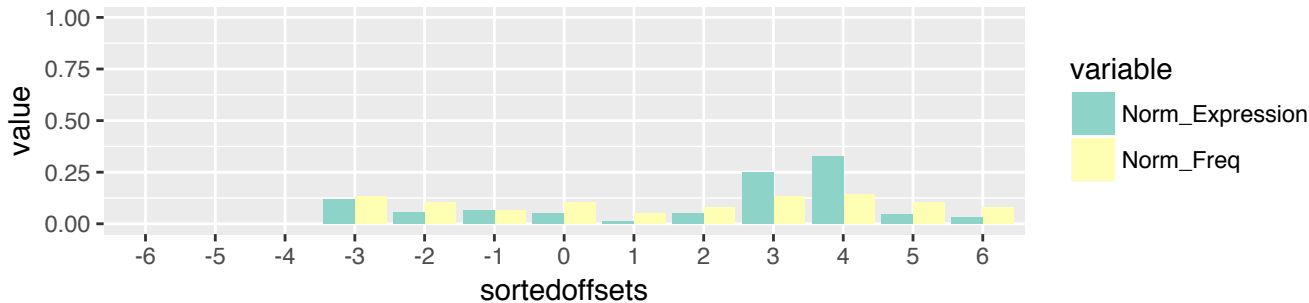

UCS (n=941)  
i-tRF & exclusive (n=246)  
5' terminus relative to 3' stem of A-loop (n=76)

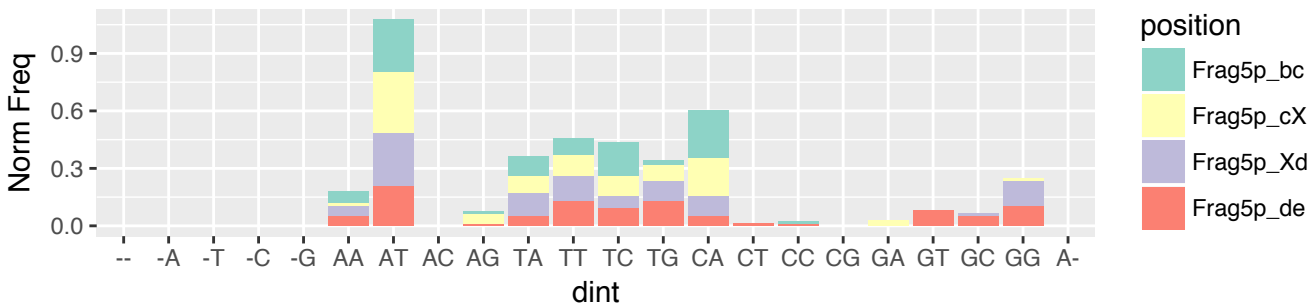

UCS (n=941)  
i-tRF & exclusive (n=246)  
5' terminus relative to 3' stem of A-loop (n=76)

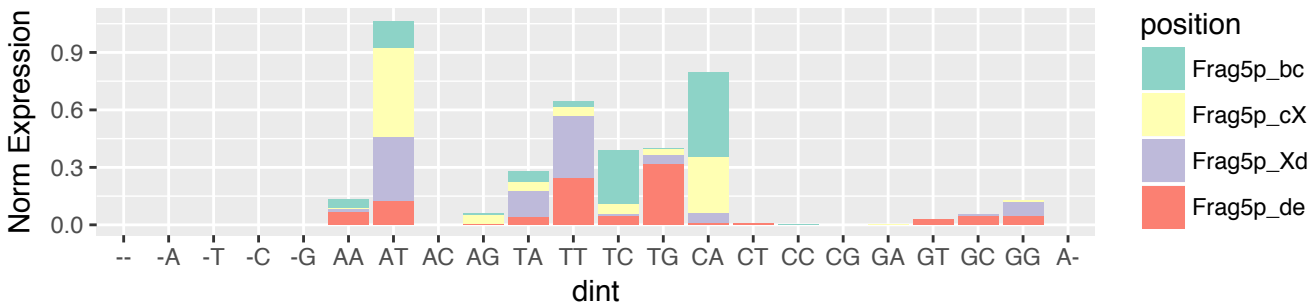

UCS (n=941)  
 i-tRF & exclusive (n=246)  
 5' terminus relative to 5' stem of T-loop (n=14)

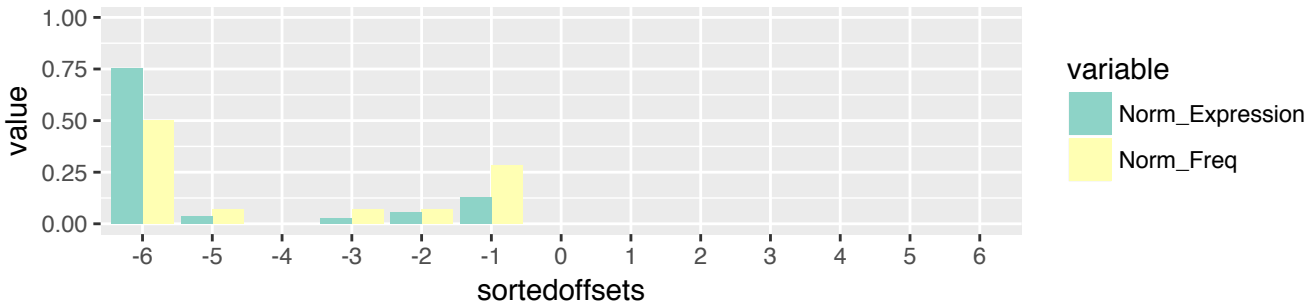

UCS (n=941)  
 i-tRF & exclusive (n=246)  
 5' terminus relative to 5' stem of T-loop (n=14)

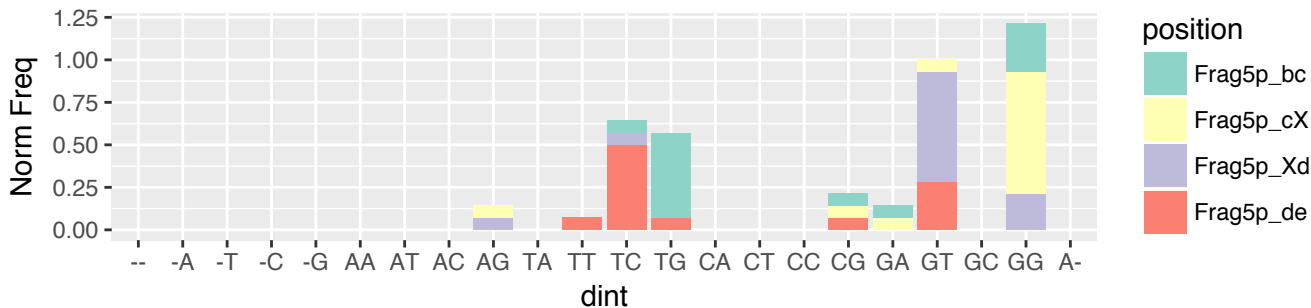

UCS (n=941)  
 i-tRF & exclusive (n=246)  
 5' terminus relative to 5' stem of T-loop (n=14)

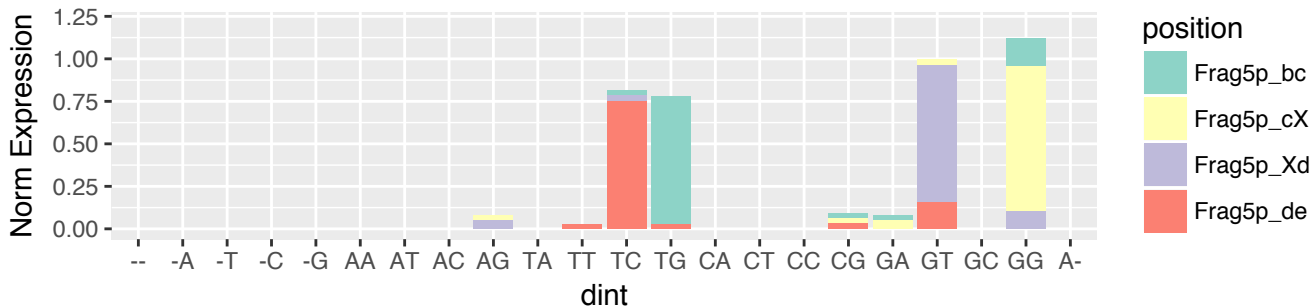

UCS (n=941)  
i-tRF & exclusive (n=246)  
3' terminus relative to 5' stem of A-loop (n=81)

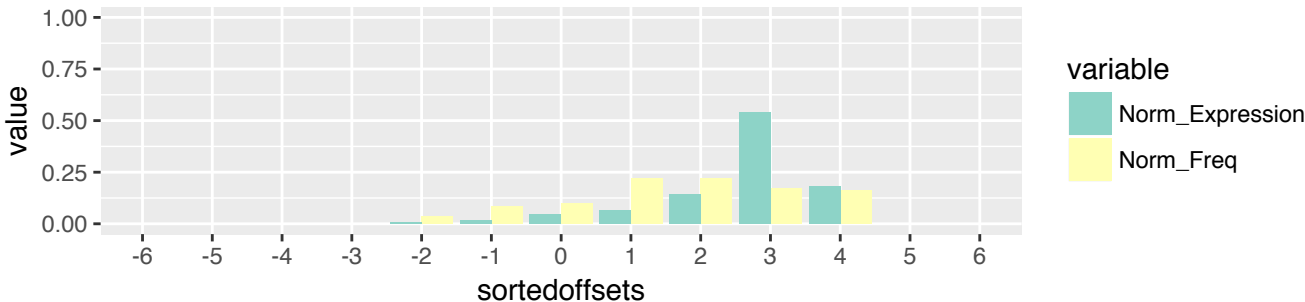

UCS (n=941)  
i-tRF & exclusive (n=246)  
3' terminus relative to 5' stem of A-loop (n=81)

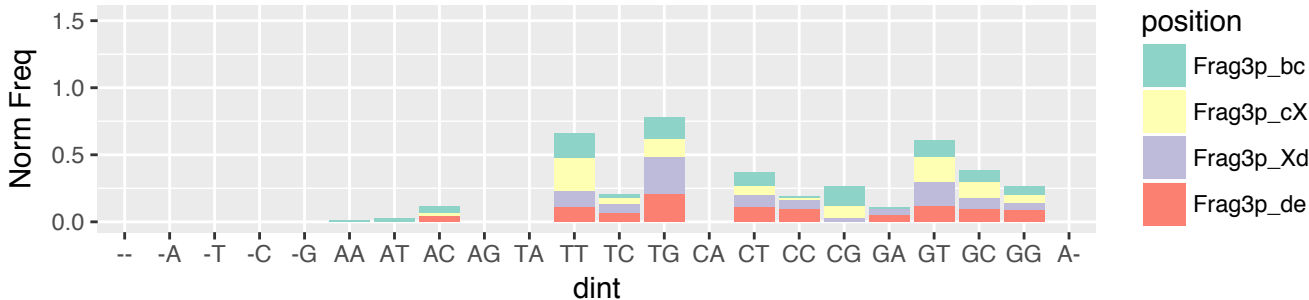

UCS (n=941)  
i-tRF & exclusive (n=246)  
3' terminus relative to 5' stem of A-loop (n=81)

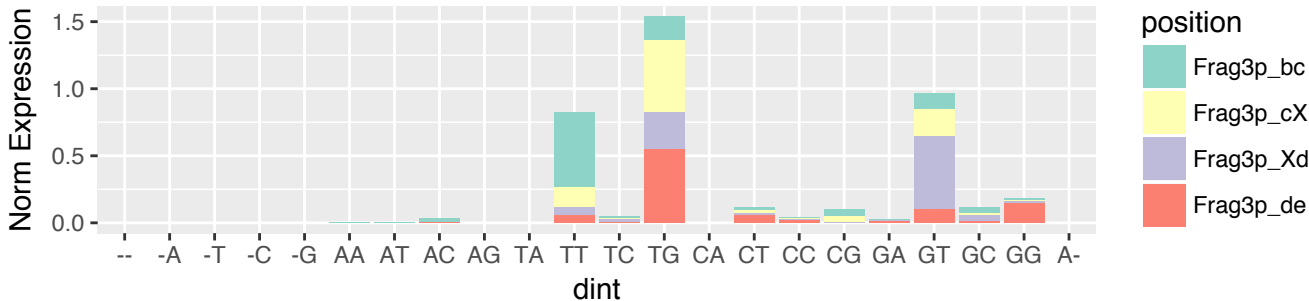

UCS (n=941)  
i-tRF & exclusive (n=246)  
3' terminus relative to 3' stem of A-loop (n=29)

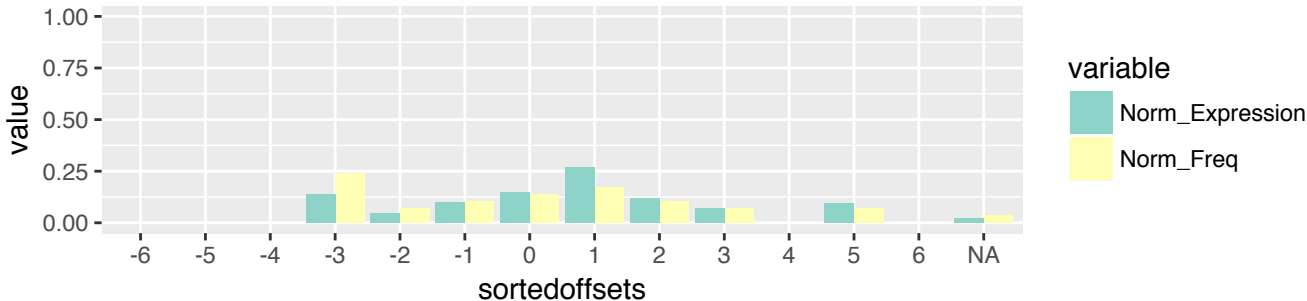

UCS (n=941)  
i-tRF & exclusive (n=246)  
3' terminus relative to 3' stem of A-loop (n=29)

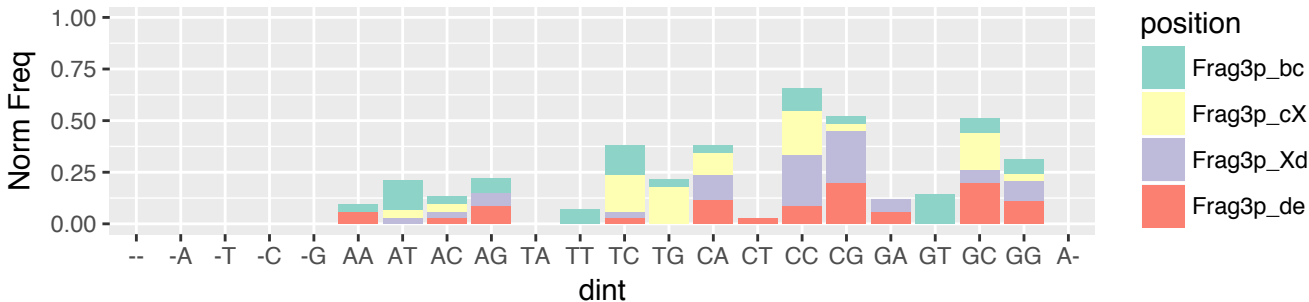

UCS (n=941)  
i-tRF & exclusive (n=246)  
3' terminus relative to 3' stem of A-loop (n=29)

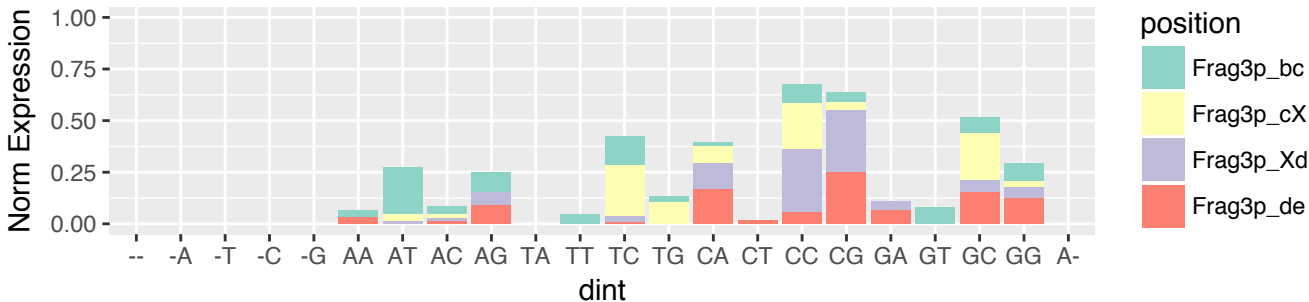

UCS (n=941)  
 i-tRF & exclusive (n=246)  
 3' terminus relative to 5' stem of T-loop (n=51)

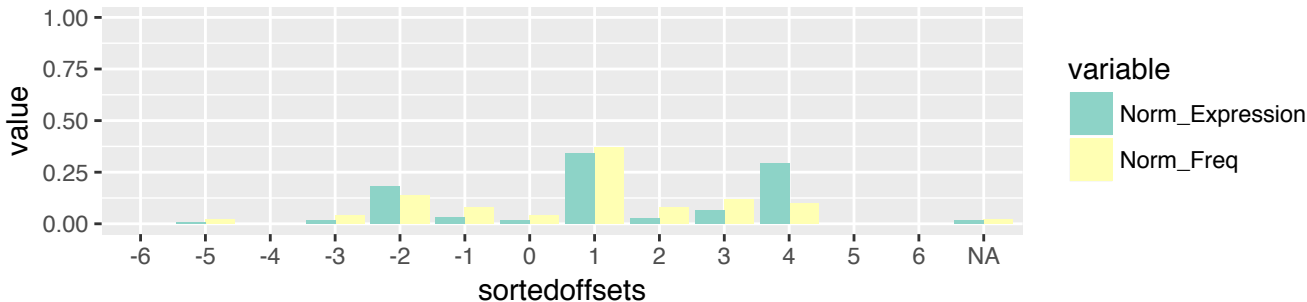

UCS (n=941)  
 i-tRF & exclusive (n=246)  
 3' terminus relative to 5' stem of T-loop (n=51)

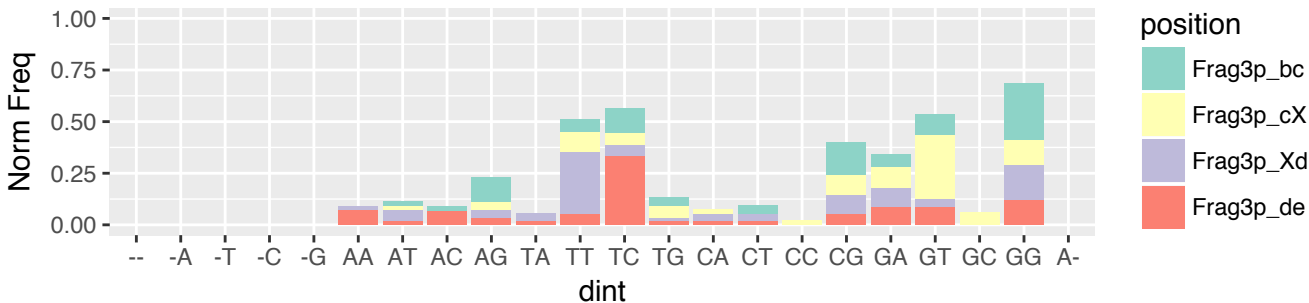

UCS (n=941)  
 i-tRF & exclusive (n=246)  
 3' terminus relative to 5' stem of T-loop (n=51)

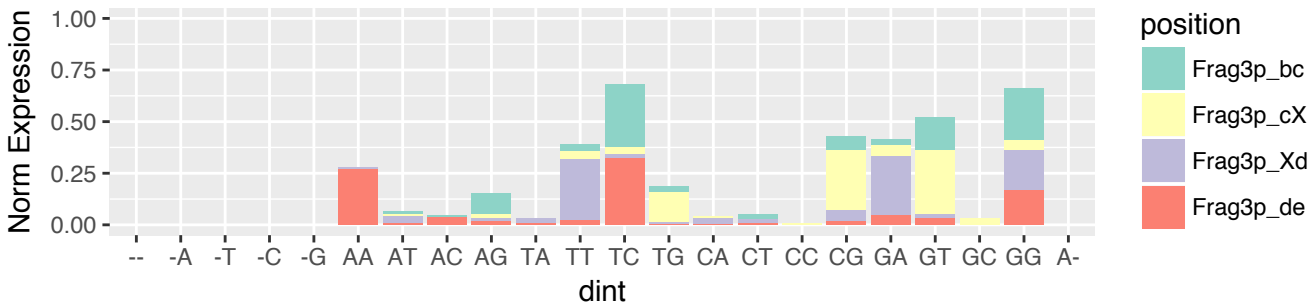

UCS (n=941)  
i-tRF & exclusive (n=246)  
3' terminus relative to 3' stem of T-loop (n=61)

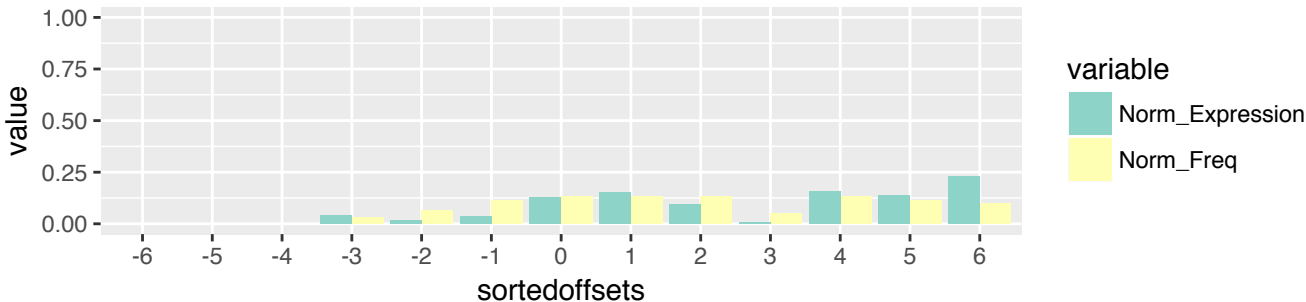

UCS (n=941)  
i-tRF & exclusive (n=246)  
3' terminus relative to 3' stem of T-loop (n=61)

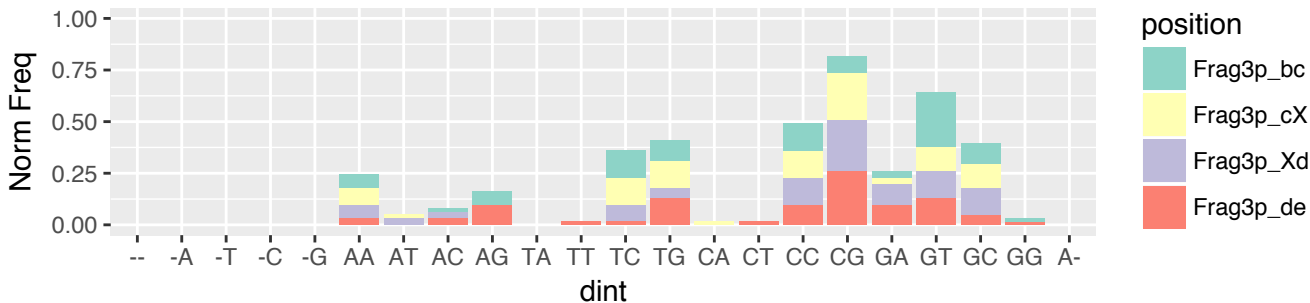

UCS (n=941)  
i-tRF & exclusive (n=246)  
3' terminus relative to 3' stem of T-loop (n=61)

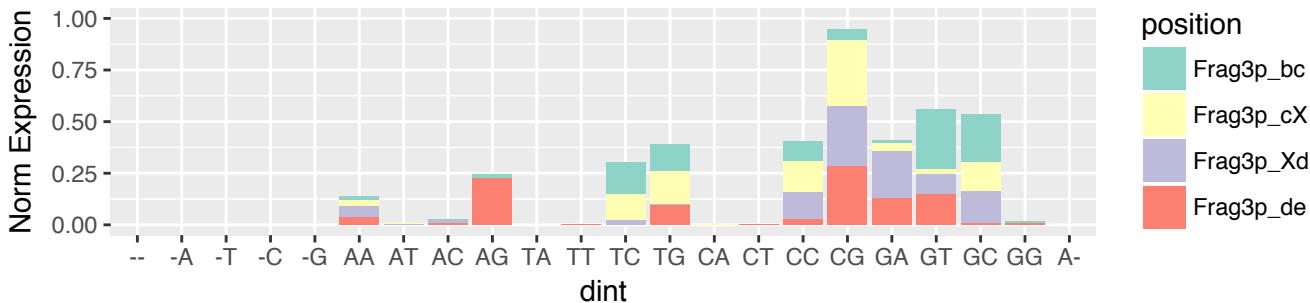

UCS (n=941)  
 i-tRF & exclusive (n=246)  
 3' terminus relative to 3' end of the tRNA (n=25)

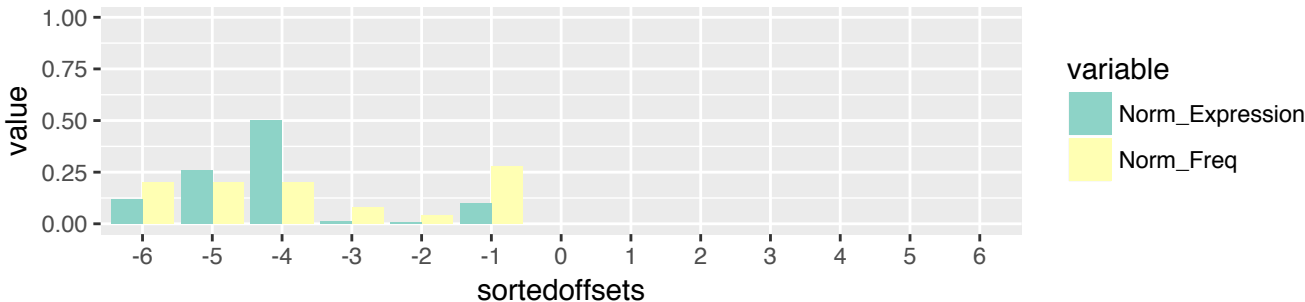

UCS (n=941)  
 i-tRF & exclusive (n=246)  
 3' terminus relative to 3' end of the tRNA (n=25)

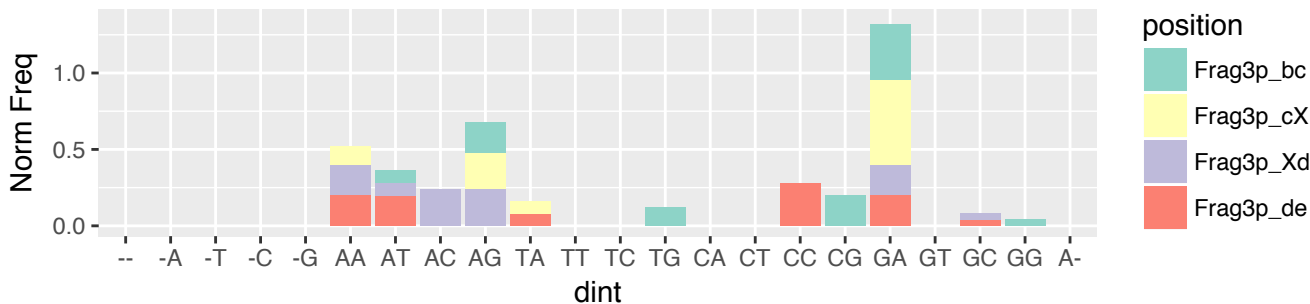

UCS (n=941)  
 i-tRF & exclusive (n=246)  
 3' terminus relative to 3' end of the tRNA (n=25)

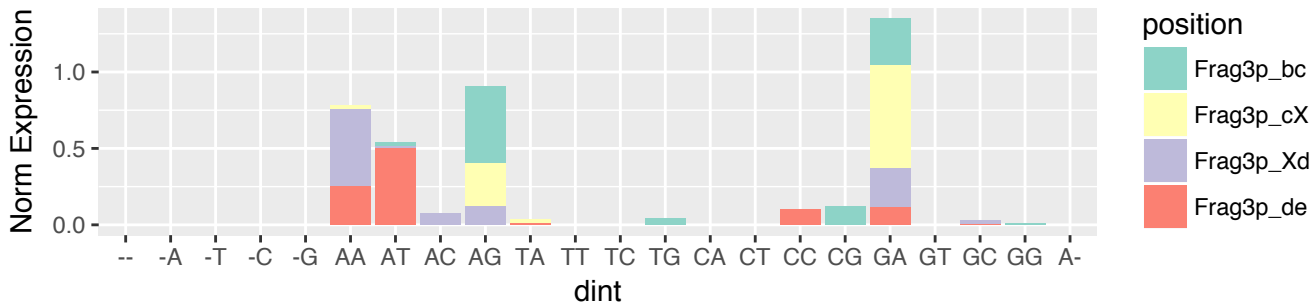



UCS (n=941)  
3'-tRF & exclusive (n=124)  
5' terminus relative to 3' stem of A-loop (n=1)

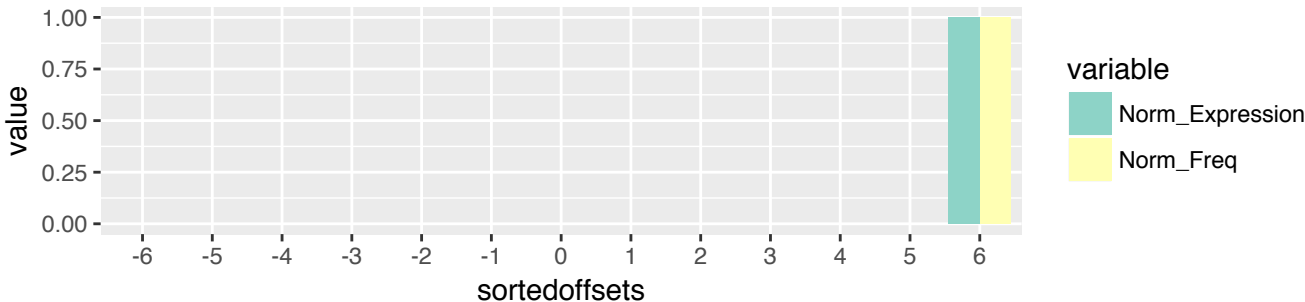

UCS (n=941)  
3'-tRF & exclusive (n=124)  
5' terminus relative to 3' stem of A-loop (n=1)

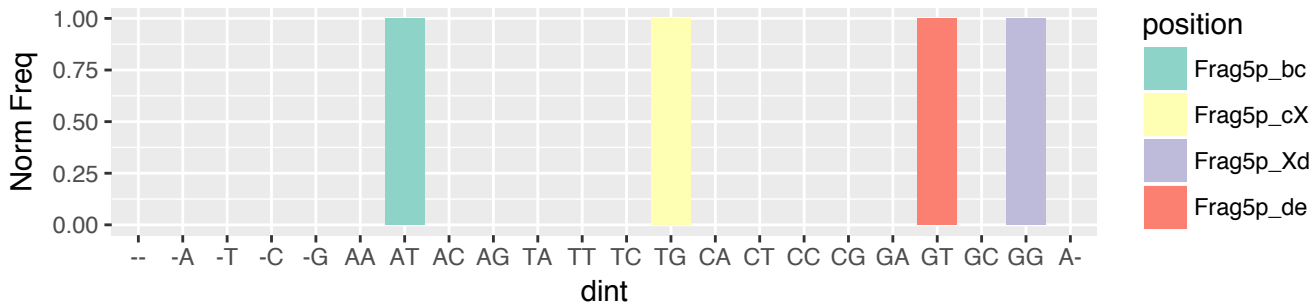

UCS (n=941)  
3'-tRF & exclusive (n=124)  
5' terminus relative to 3' stem of A-loop (n=1)

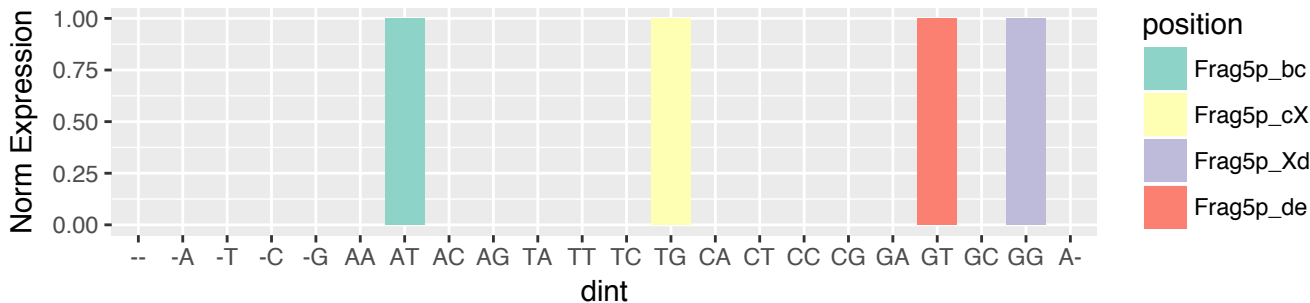

UCS (n=941)  
 3'-tRF & exclusive (n=124)  
 5' terminus relative to 5' stem of T-loop (n=100)

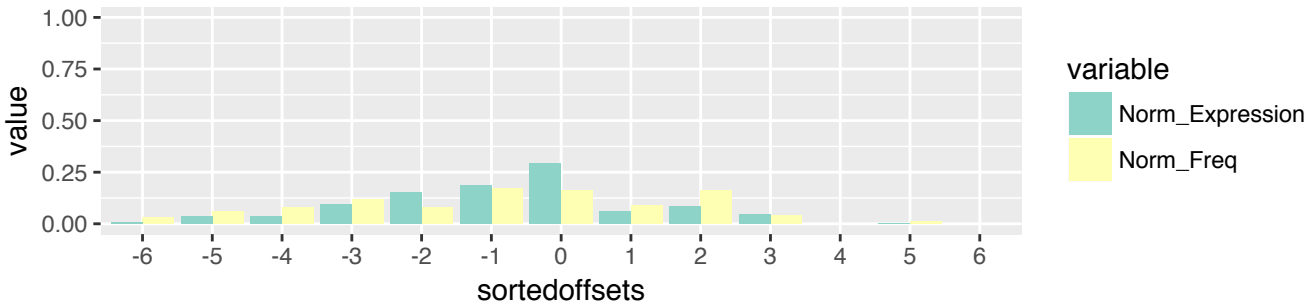

UCS (n=941)  
 3'-tRF & exclusive (n=124)  
 5' terminus relative to 5' stem of T-loop (n=100)

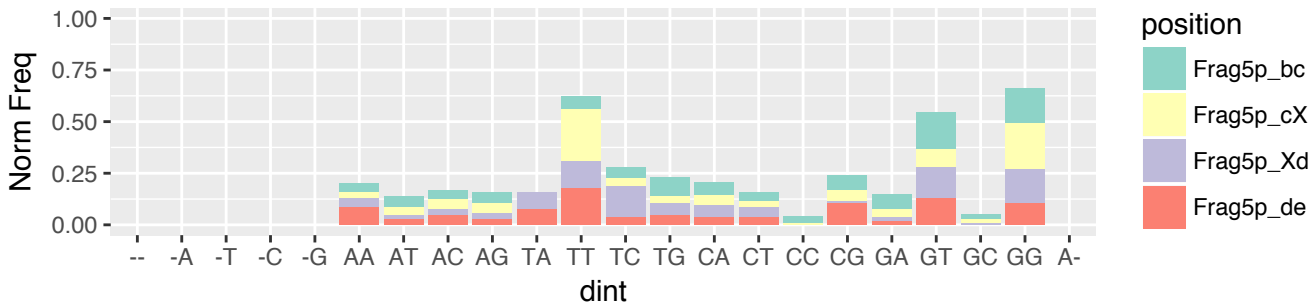

UCS (n=941)  
 3'-tRF & exclusive (n=124)  
 5' terminus relative to 5' stem of T-loop (n=100)

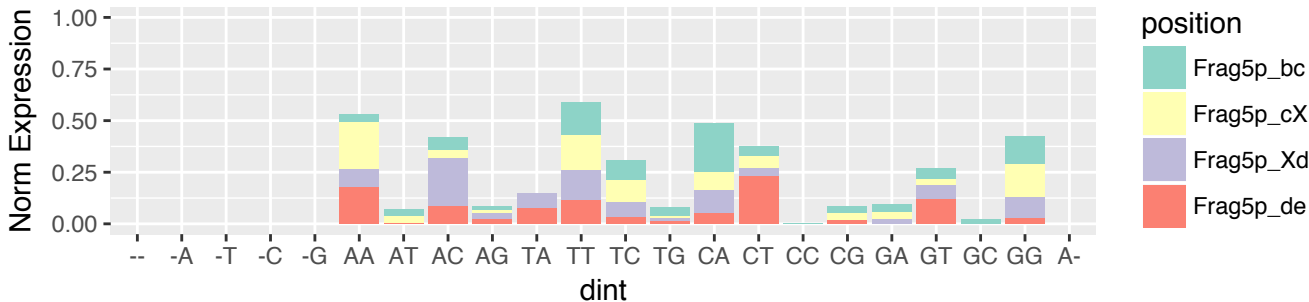

UCS (n=941)  
 3'-tRF & exclusive (n=124)  
 5' terminus relative to 3' stem of T-loop (n=23)

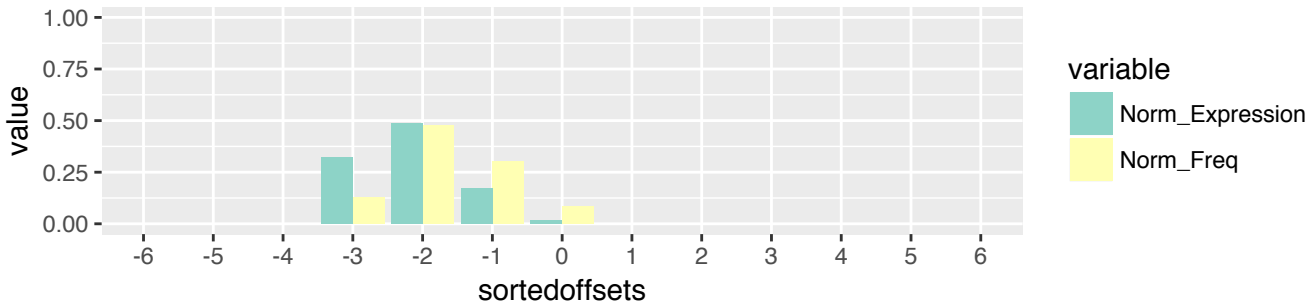

UCS (n=941)  
 3'-tRF & exclusive (n=124)  
 5' terminus relative to 3' stem of T-loop (n=23)

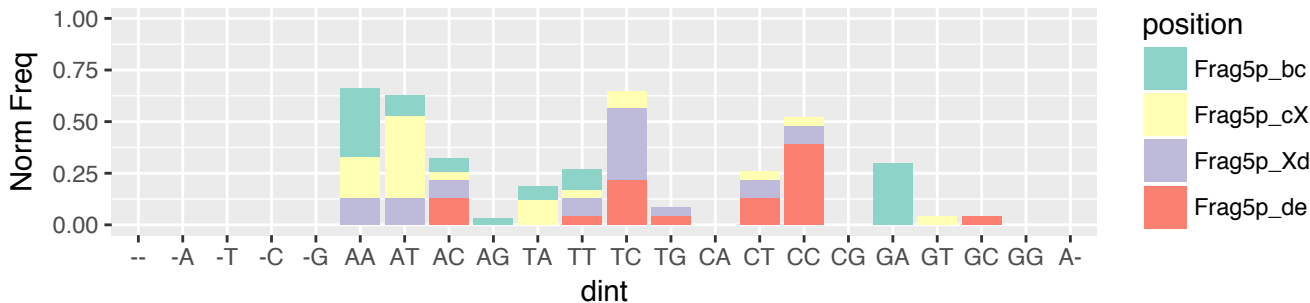

UCS (n=941)  
 3'-tRF & exclusive (n=124)  
 5' terminus relative to 3' stem of T-loop (n=23)

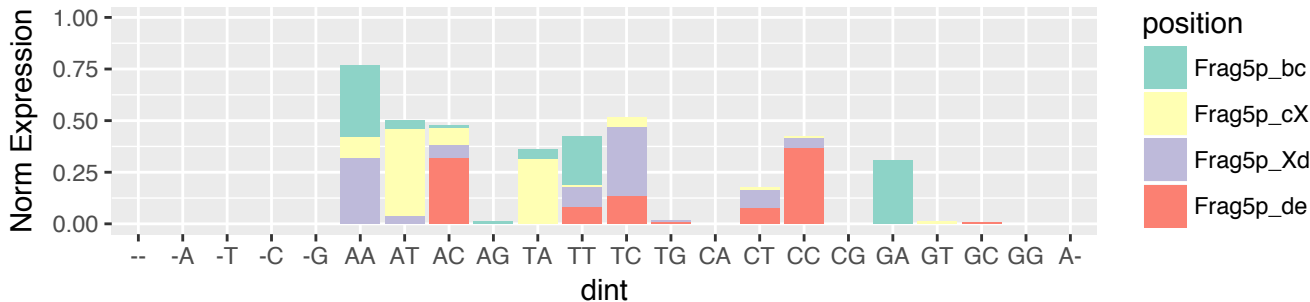

UCS (n=941)  
 3'-tRF & exclusive (n=124)  
 3' terminus relative to 3' end of the tRNA (n=124)

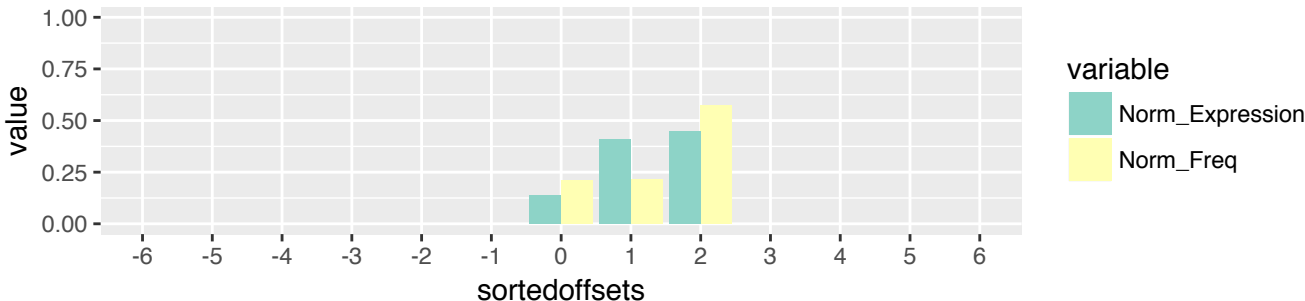

UCS (n=941)  
 3'-tRF & exclusive (n=124)  
 3' terminus relative to 3' end of the tRNA (n=124)

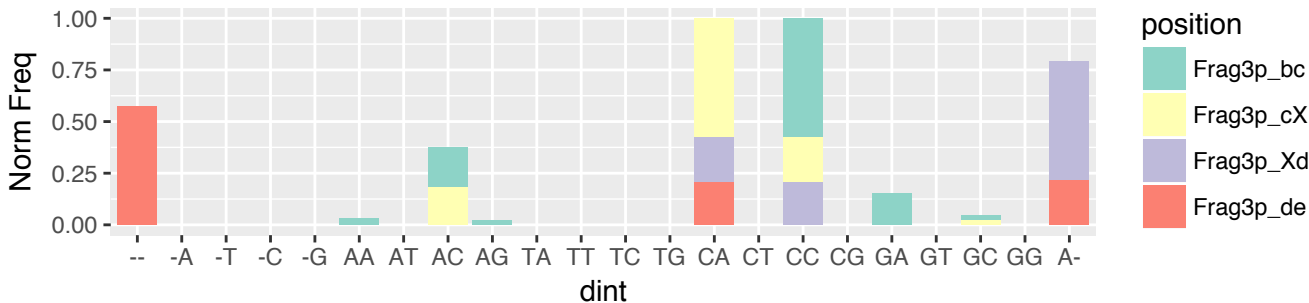

UCS (n=941)  
 3'-tRF & exclusive (n=124)  
 3' terminus relative to 3' end of the tRNA (n=124)

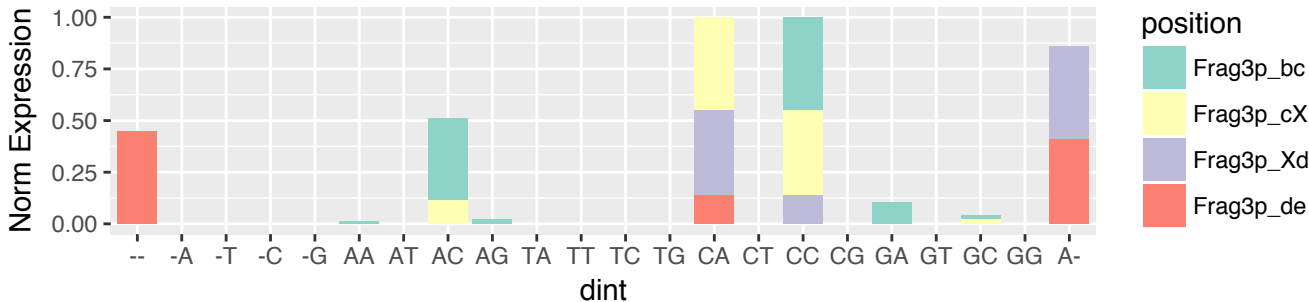

UVM (n=1209)  
5'-half & exclusive (n=5)  
5' terminus relative to 5' end of the tRNA (n=5)



UVM (n=1209)  
5'-half & exclusive (n=5)  
5' terminus relative to 5' end of the tRNA (n=5)

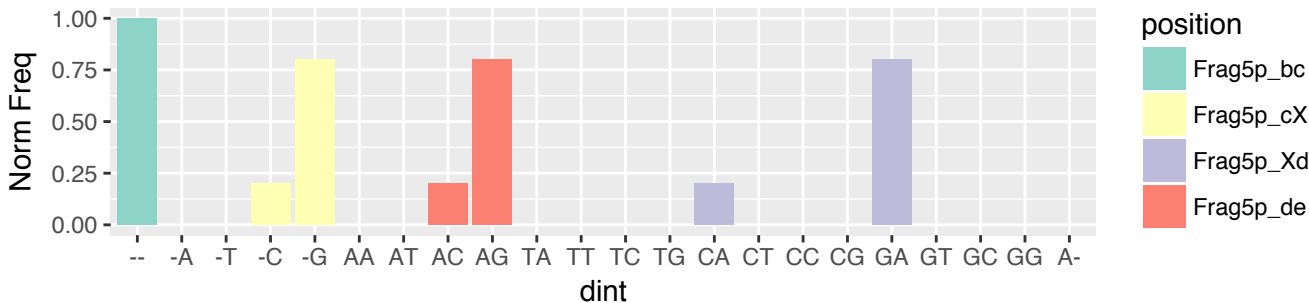

UVM (n=1209)  
5'-half & exclusive (n=5)  
5' terminus relative to 5' end of the tRNA (n=5)

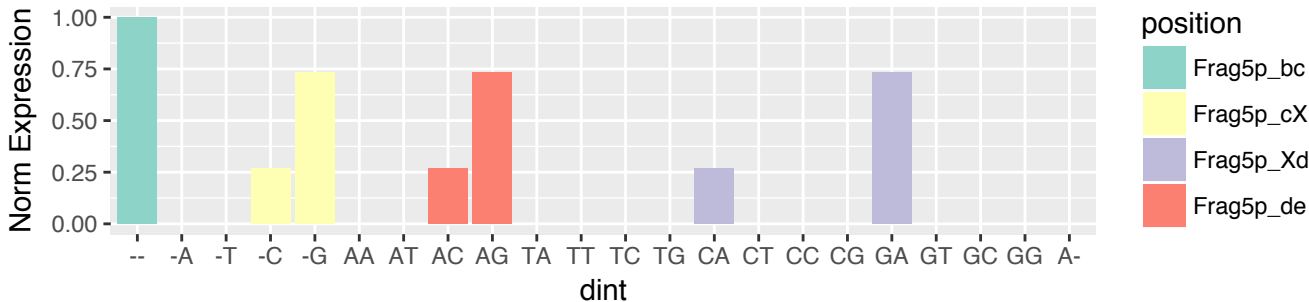

UVM (n=1209)  
 5'-half & exclusive (n=5)  
 3' terminus relative to 5' stem of A-loop (n=5)

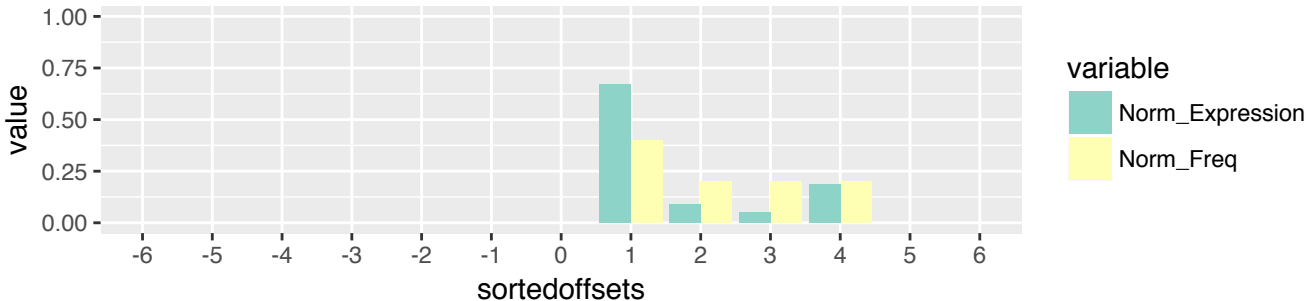

UVM (n=1209)  
 5'-half & exclusive (n=5)  
 3' terminus relative to 5' stem of A-loop (n=5)



UVM (n=1209)  
 5'-half & exclusive (n=5)  
 3' terminus relative to 5' stem of A-loop (n=5)

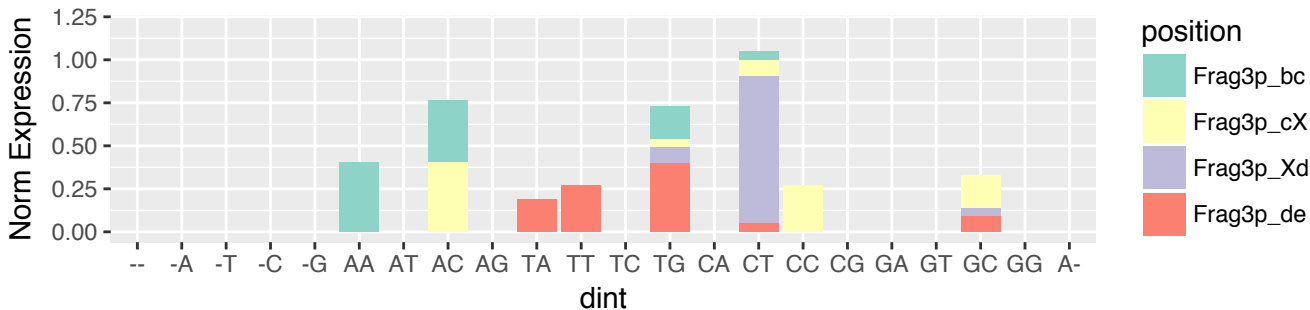

UVM (n=1209)  
 5'-tRF & exclusive (n=171)  
 5' terminus relative to 5' end of the tRNA (n=171)

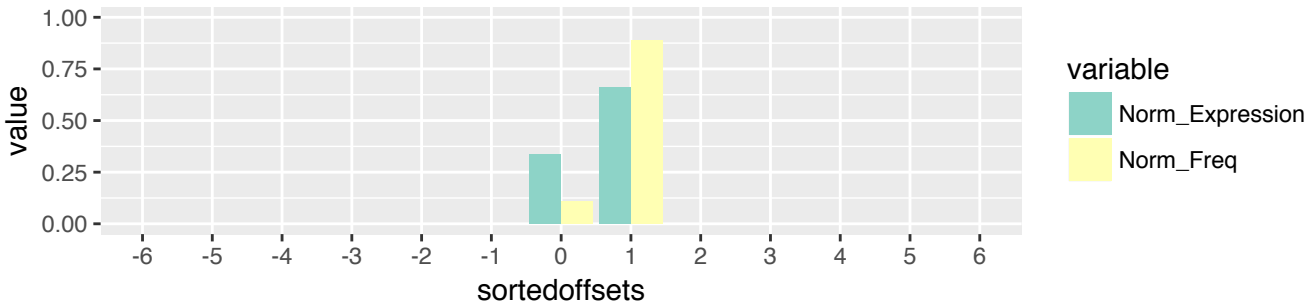

UVM (n=1209)  
 5'-tRF & exclusive (n=171)  
 5' terminus relative to 5' end of the tRNA (n=171)

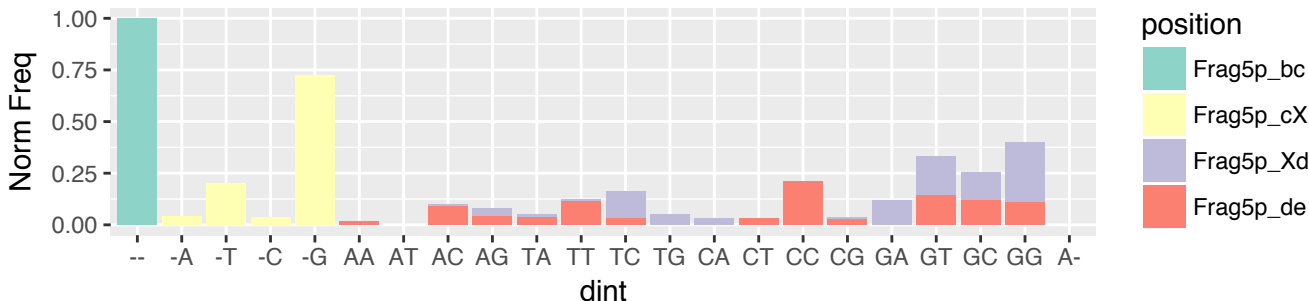

UVM (n=1209)  
 5'-tRF & exclusive (n=171)  
 5' terminus relative to 5' end of the tRNA (n=171)

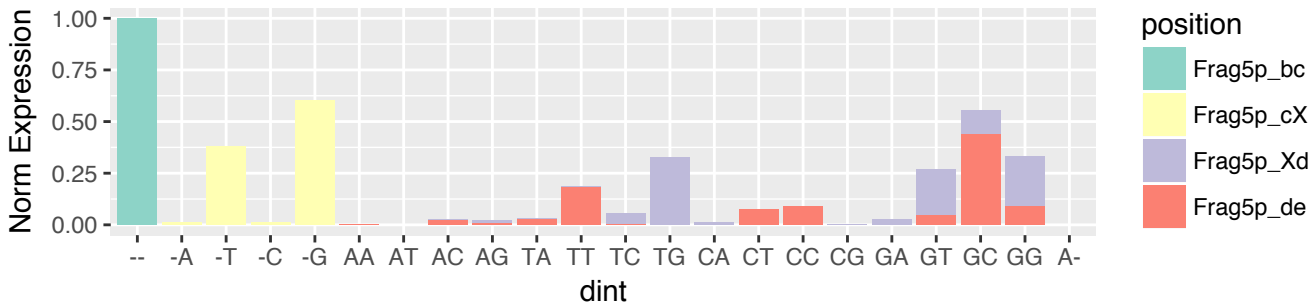

UVM (n=1209)  
 5'-tRF & exclusive (n=171)  
 3' terminus relative to 5' stem of D-loop (n=7)

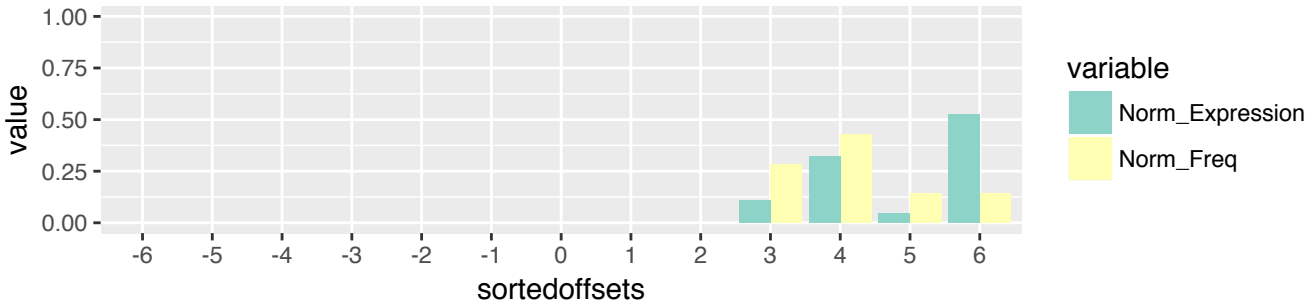

UVM (n=1209)  
 5'-tRF & exclusive (n=171)  
 3' terminus relative to 5' stem of D-loop (n=7)

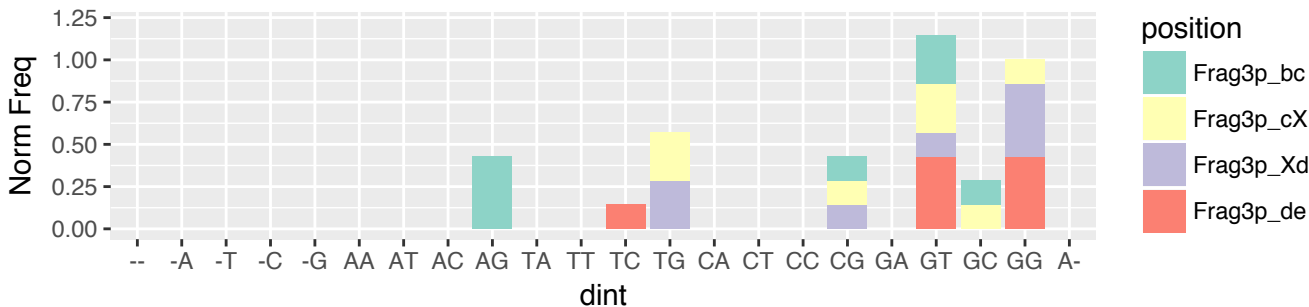

UVM (n=1209)  
 5'-tRF & exclusive (n=171)  
 3' terminus relative to 5' stem of D-loop (n=7)

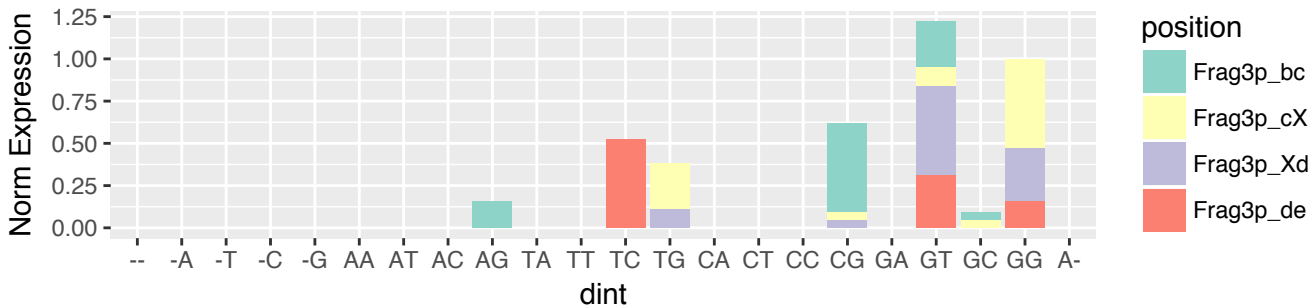



UVM (n=1209)  
 5'-tRF & exclusive (n=171)  
 3' terminus relative to 3' stem of D-loop (n=150)

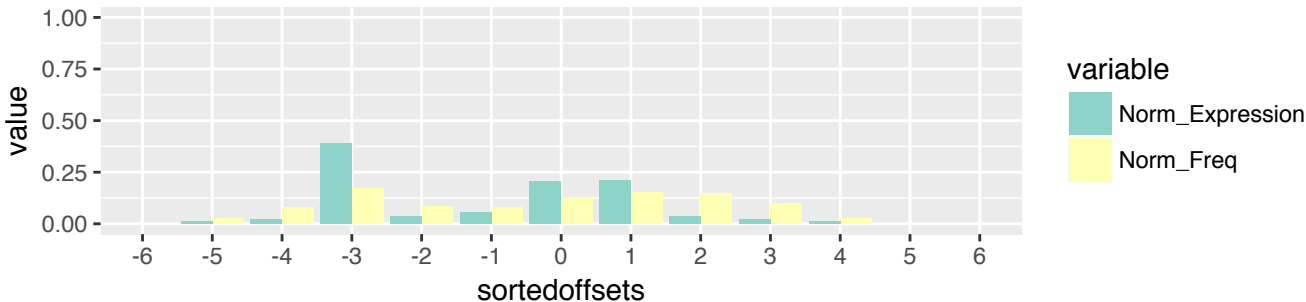

UVM (n=1209)  
 5'-tRF & exclusive (n=171)  
 3' terminus relative to 3' stem of D-loop (n=150)

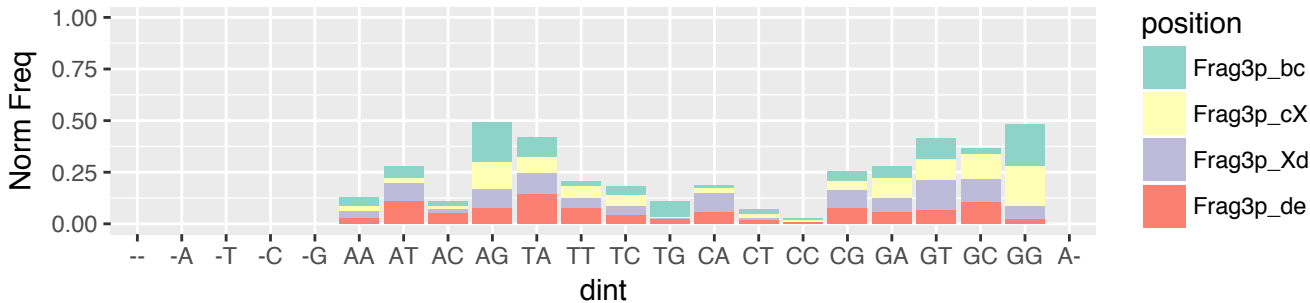

UVM (n=1209)  
 5'-tRF & exclusive (n=171)  
 3' terminus relative to 3' stem of D-loop (n=150)

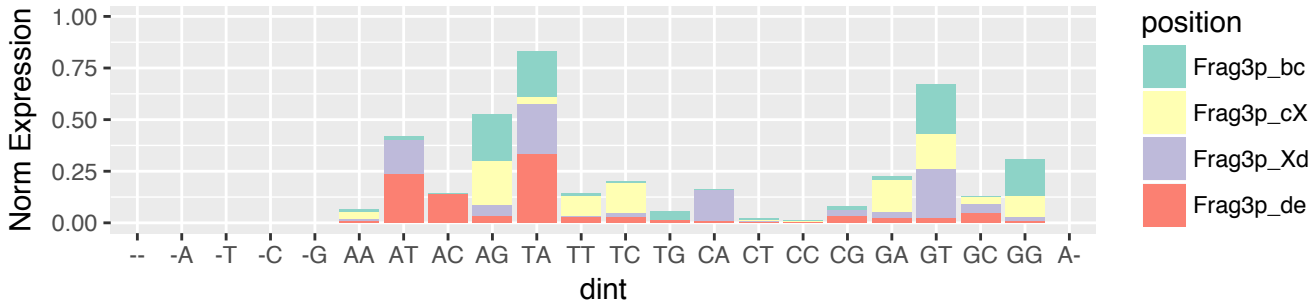

UVM (n=1209)  
 5'-tRF & exclusive (n=171)  
 3' terminus relative to 5' stem of A-loop (n=8)

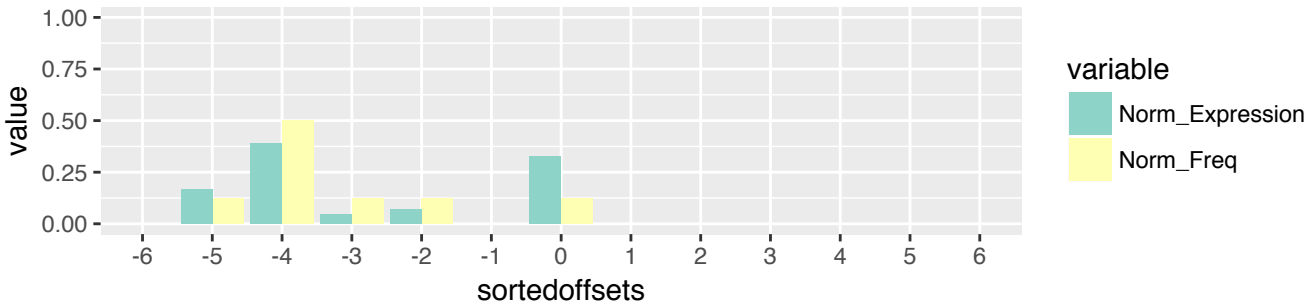

UVM (n=1209)  
 5'-tRF & exclusive (n=171)  
 3' terminus relative to 5' stem of A-loop (n=8)

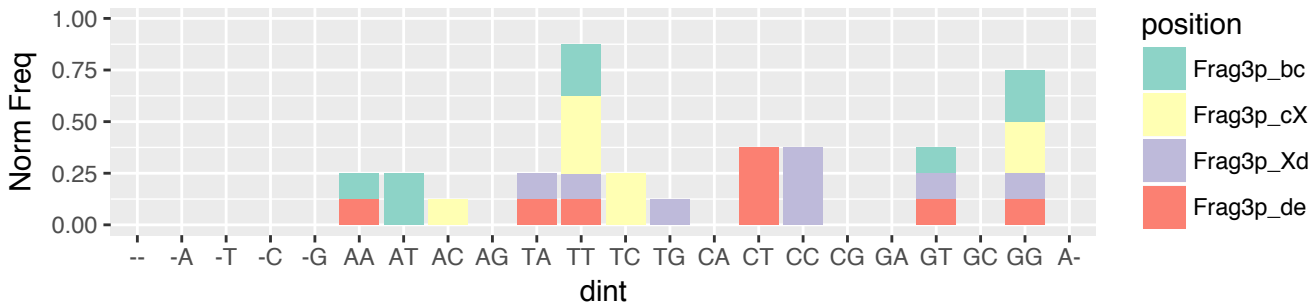

UVM (n=1209)  
 5'-tRF & exclusive (n=171)  
 3' terminus relative to 5' stem of A-loop (n=8)

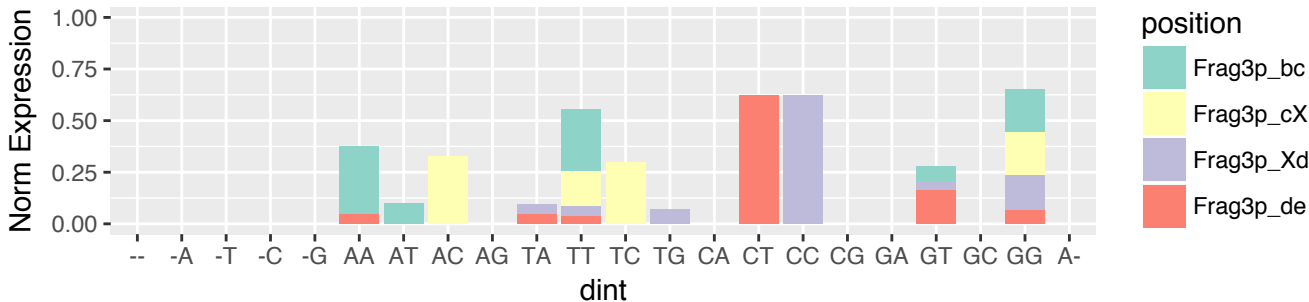

UVM (n=1209)  
 5'-tRF & exclusive (n=171)  
 3' terminus relative to 3' stem of A-loop (n=6)

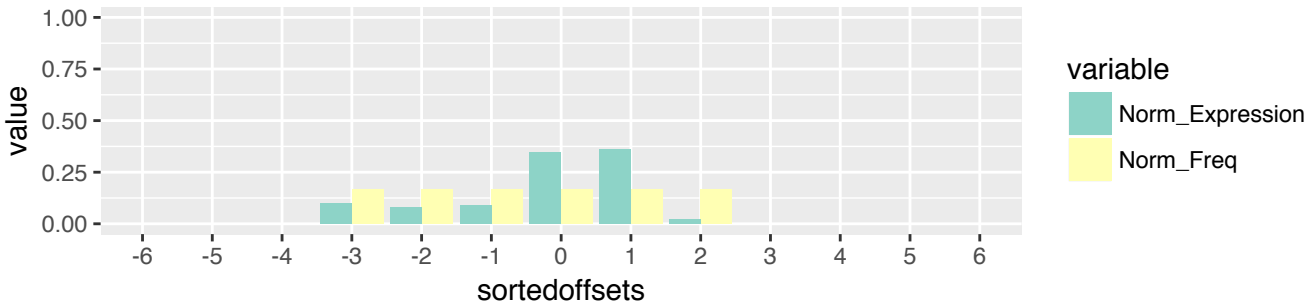

UVM (n=1209)  
 5'-tRF & exclusive (n=171)  
 3' terminus relative to 3' stem of A-loop (n=6)

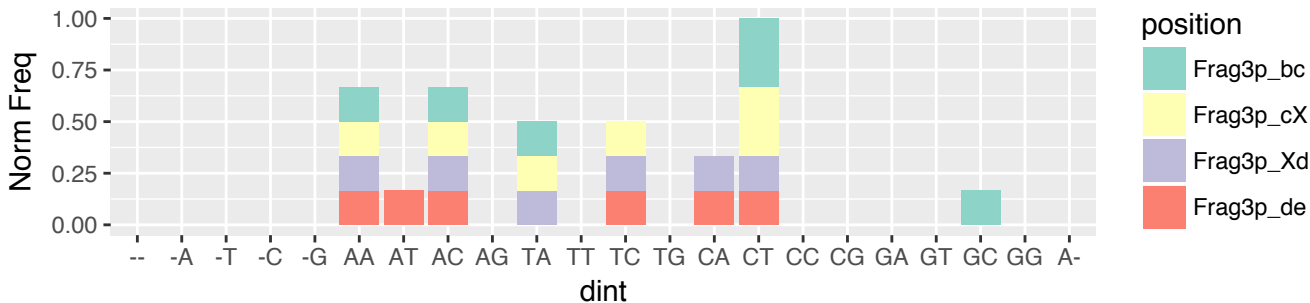

UVM (n=1209)  
 5'-tRF & exclusive (n=171)  
 3' terminus relative to 3' stem of A-loop (n=6)

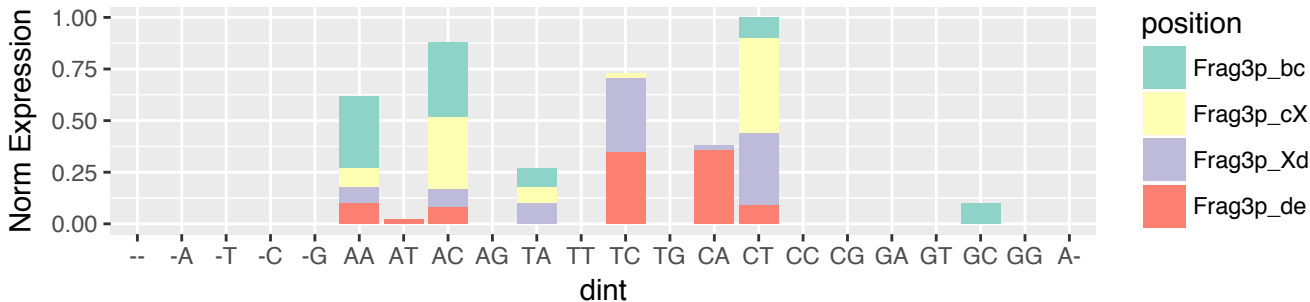

UVM (n=1209)  
i-tRF & exclusive (n=275)  
5' terminus relative to 5' end of the tRNA (n=6)

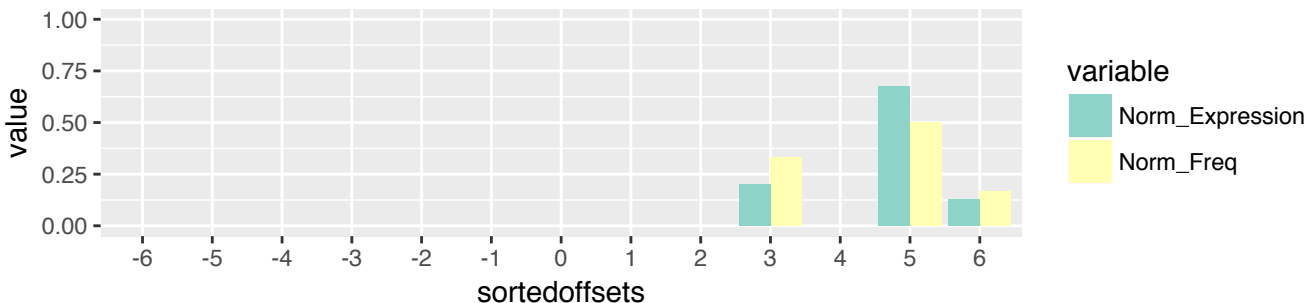

UVM (n=1209)  
i-tRF & exclusive (n=275)  
5' terminus relative to 5' end of the tRNA (n=6)

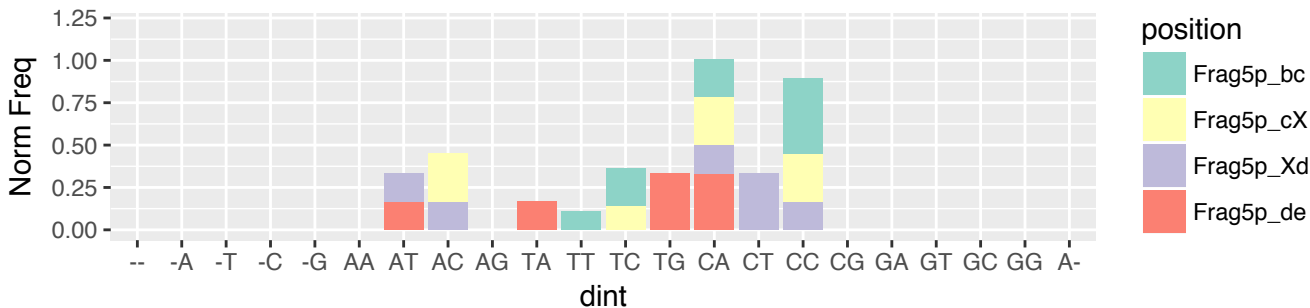

UVM (n=1209)  
i-tRF & exclusive (n=275)  
5' terminus relative to 5' end of the tRNA (n=6)

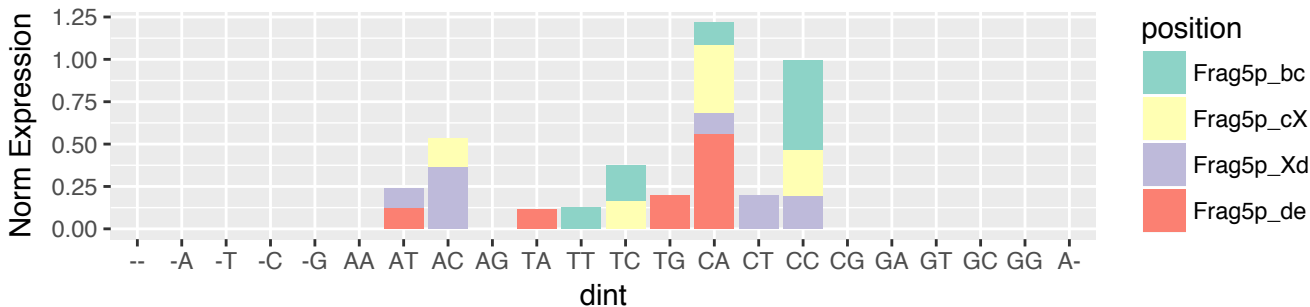

UVM (n=1209)  
i-tRF & exclusive (n=275)  
5' terminus relative to 5' stem of D-loop (n=81)

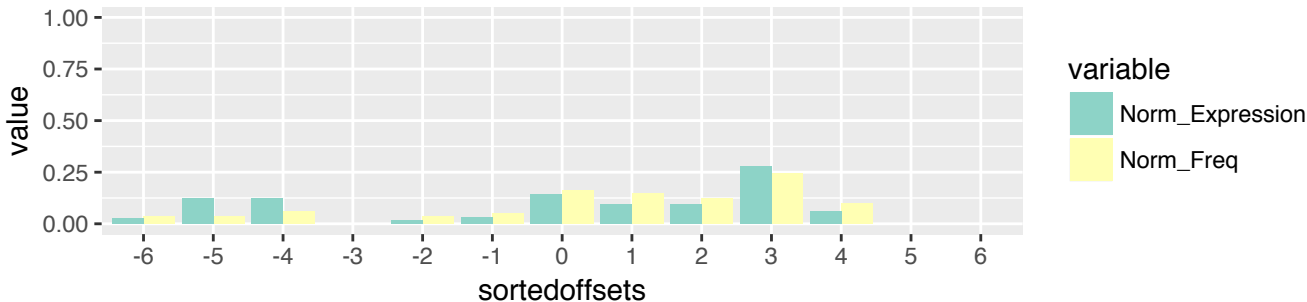

UVM (n=1209)  
i-tRF & exclusive (n=275)  
5' terminus relative to 5' stem of D-loop (n=81)

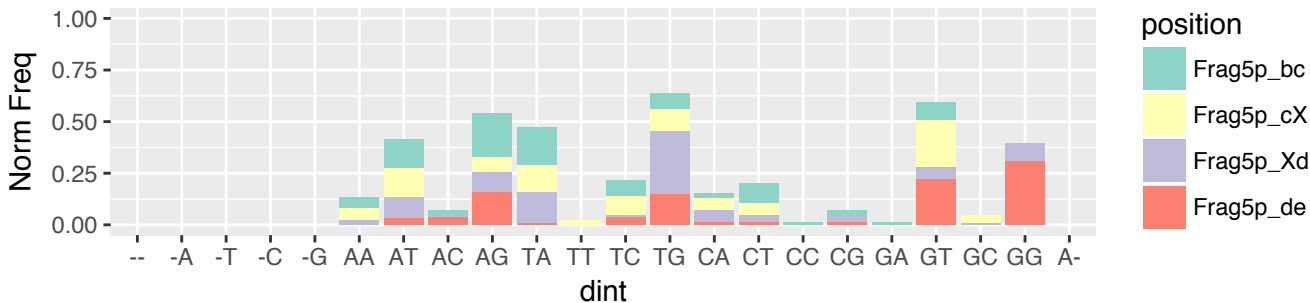

UVM (n=1209)  
i-tRF & exclusive (n=275)  
5' terminus relative to 5' stem of D-loop (n=81)

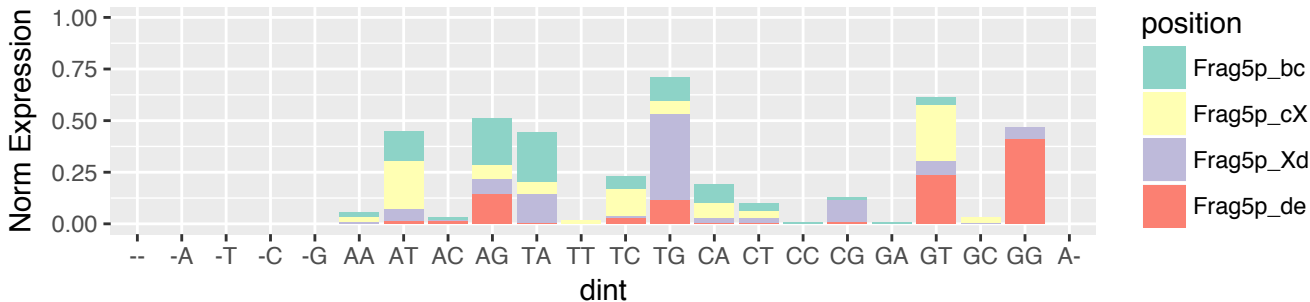

UVM (n=1209)  
 i-tRF & exclusive (n=275)  
 5' terminus relative to 3' stem of D-loop (n=30)

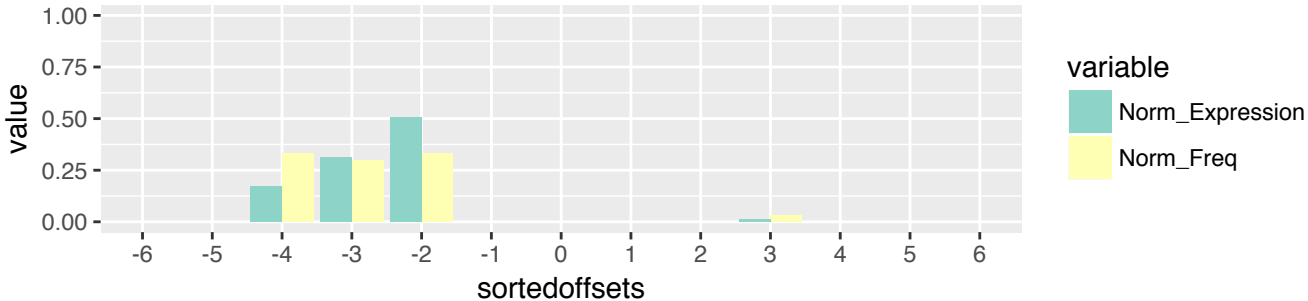

UVM (n=1209)  
 i-tRF & exclusive (n=275)  
 5' terminus relative to 3' stem of D-loop (n=30)

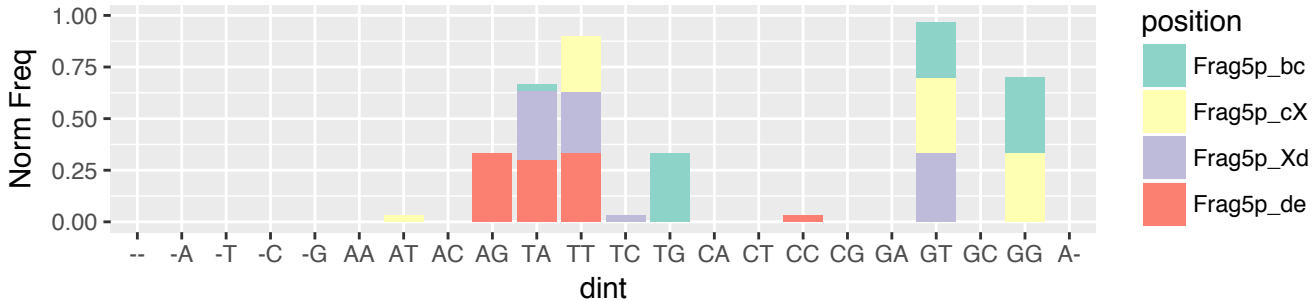

UVM (n=1209)  
 i-tRF & exclusive (n=275)  
 5' terminus relative to 3' stem of D-loop (n=30)

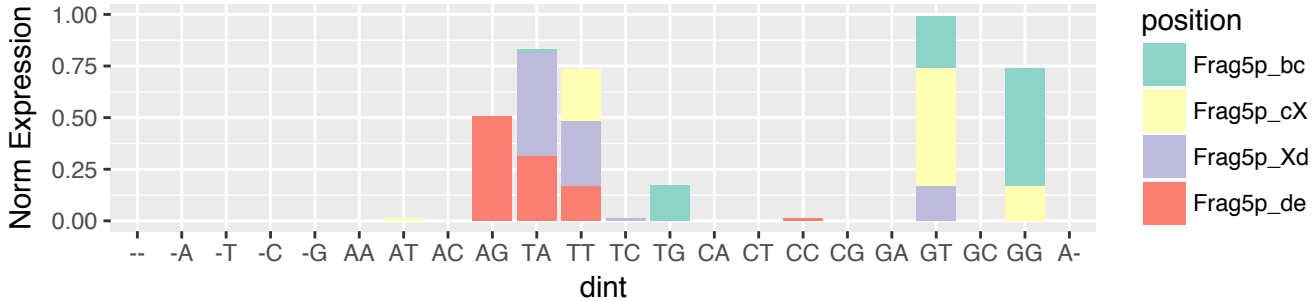

UVM (n=1209)  
 i-tRF & exclusive (n=275)  
 5' terminus relative to 5' stem of A-loop (n=81)

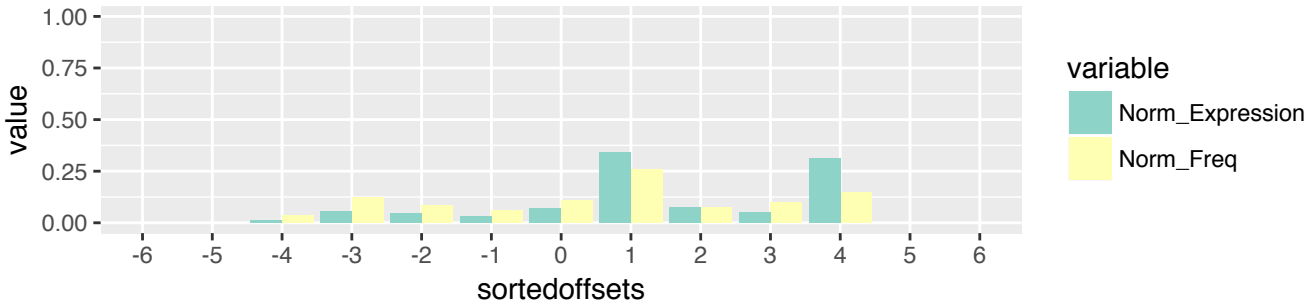

UVM (n=1209)  
 i-tRF & exclusive (n=275)  
 5' terminus relative to 5' stem of A-loop (n=81)

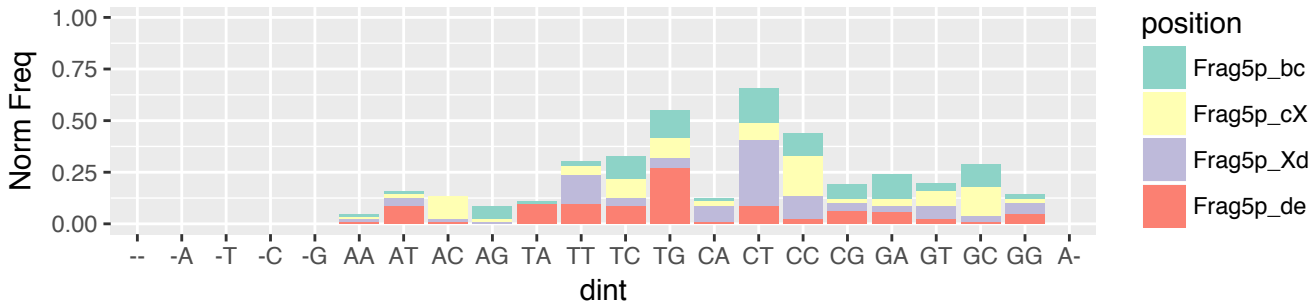

UVM (n=1209)  
 i-tRF & exclusive (n=275)  
 5' terminus relative to 5' stem of A-loop (n=81)

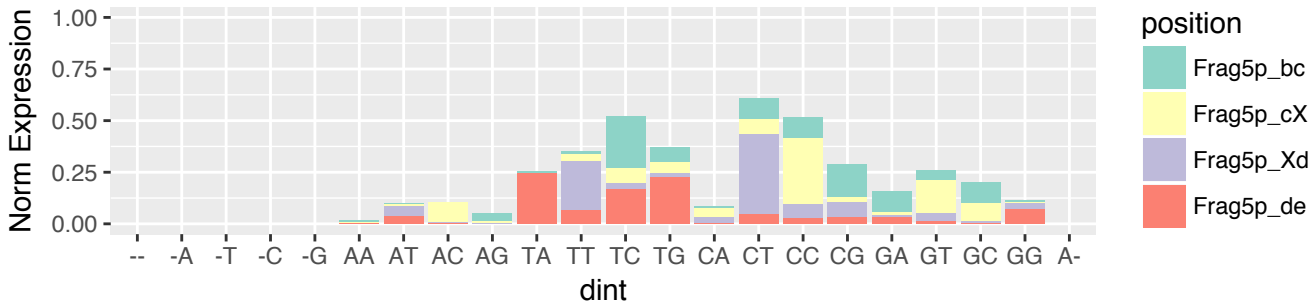

UVM (n=1209)  
 i-tRF & exclusive (n=275)  
 5' terminus relative to 3' stem of A-loop (n=65)

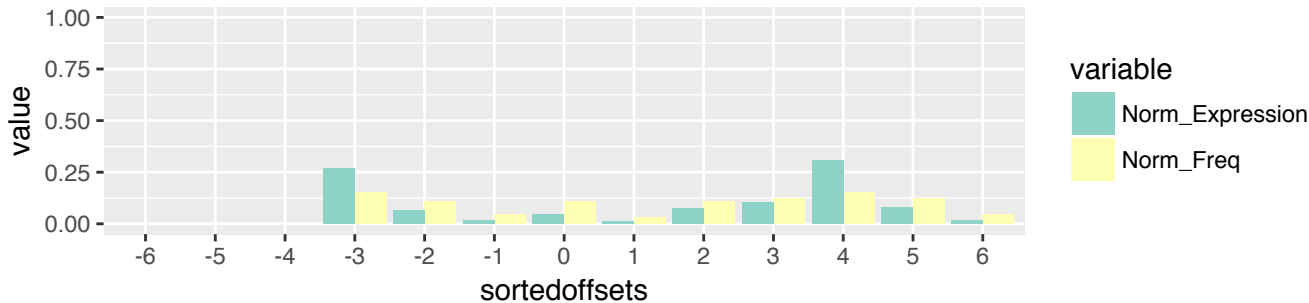

UVM (n=1209)  
 i-tRF & exclusive (n=275)  
 5' terminus relative to 3' stem of A-loop (n=65)

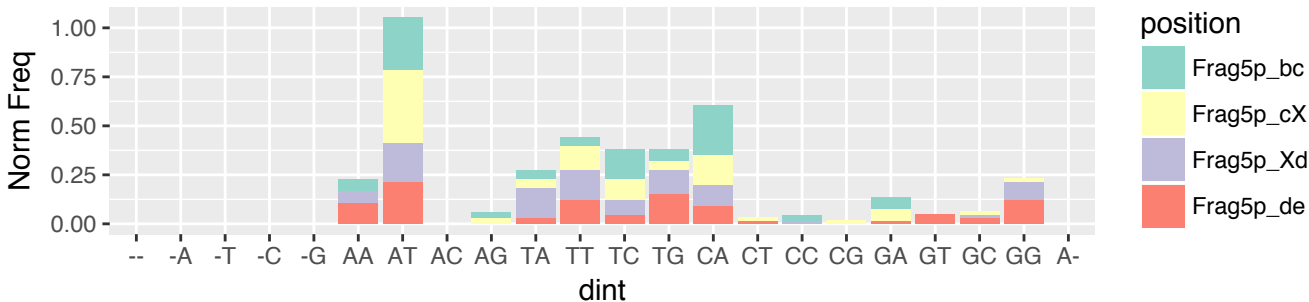

UVM (n=1209)  
 i-tRF & exclusive (n=275)  
 5' terminus relative to 3' stem of A-loop (n=65)

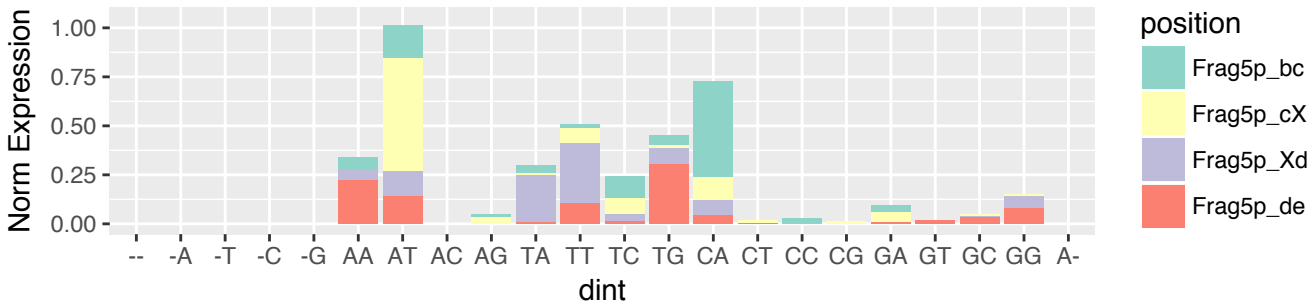



UVM (n=1209)  
i-tRF & exclusive (n=275)  
5' terminus relative to 5' stem of T-loop (n=12)

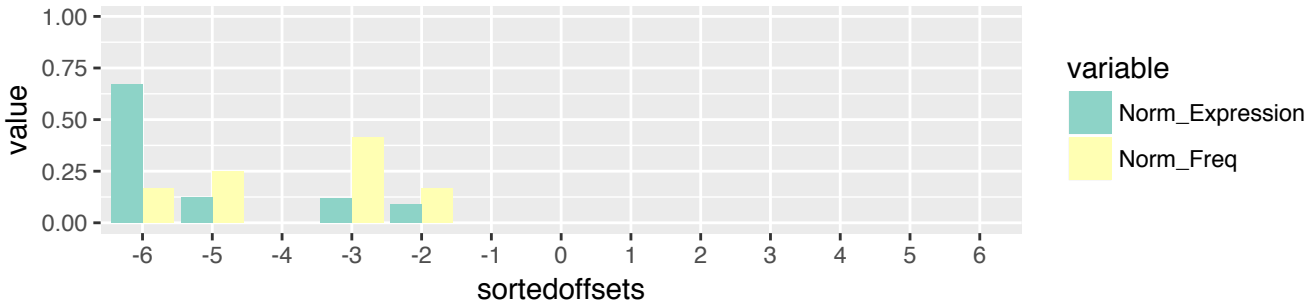

UVM (n=1209)  
i-tRF & exclusive (n=275)  
5' terminus relative to 5' stem of T-loop (n=12)

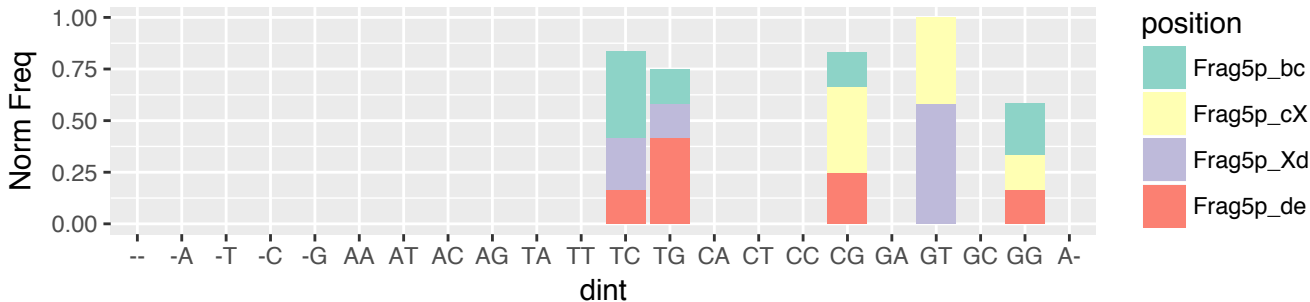

UVM (n=1209)  
i-tRF & exclusive (n=275)  
5' terminus relative to 5' stem of T-loop (n=12)

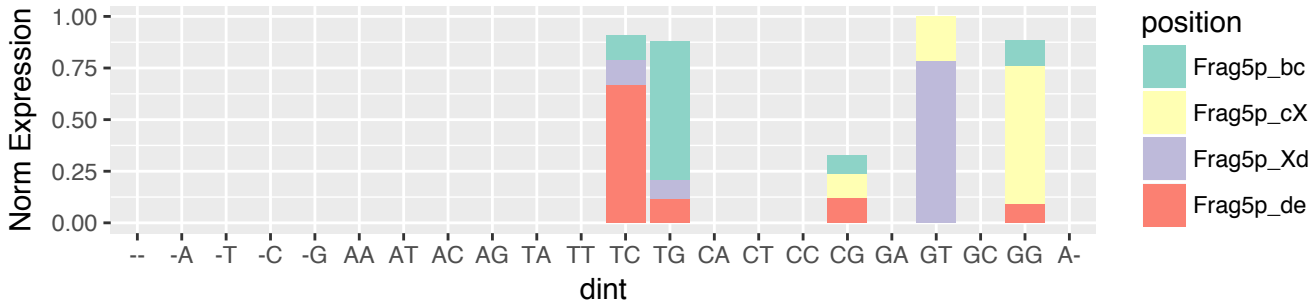

UVM (n=1209)  
 i-tRF & exclusive (n=275)  
 3' terminus relative to 5' stem of A-loop (n=46)

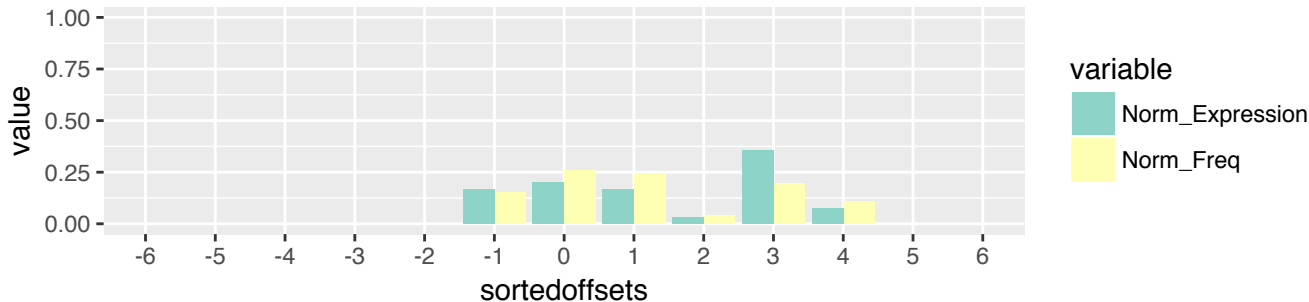

UVM (n=1209)  
 i-tRF & exclusive (n=275)  
 3' terminus relative to 5' stem of A-loop (n=46)

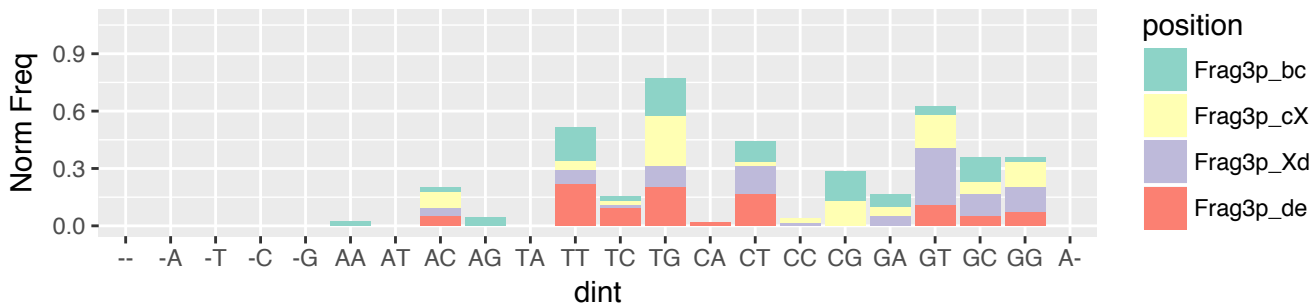

UVM (n=1209)  
 i-tRF & exclusive (n=275)  
 3' terminus relative to 5' stem of A-loop (n=46)

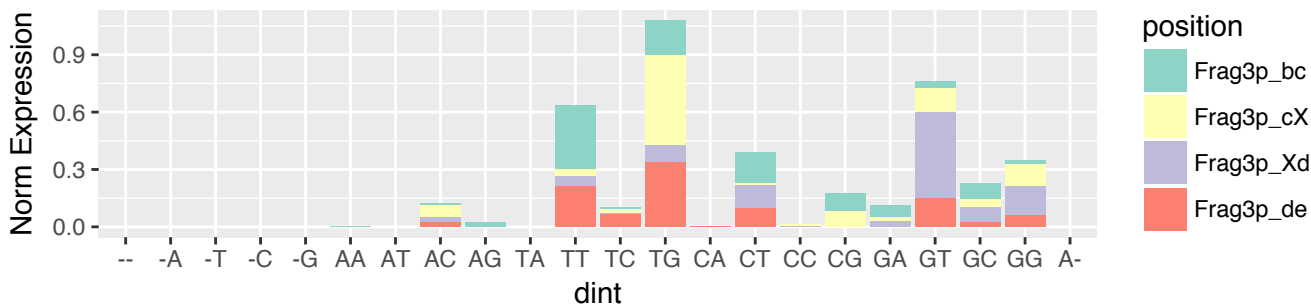

UVM (n=1209)  
 i-tRF & exclusive (n=275)  
 3' terminus relative to 3' stem of A-loop (n=81)

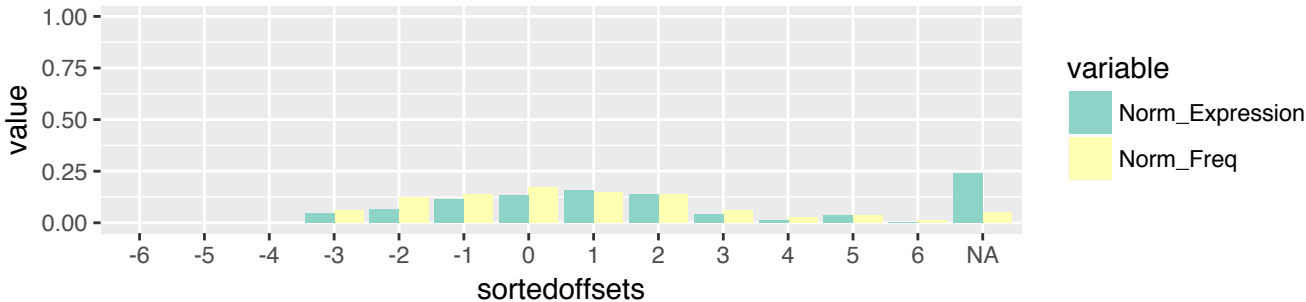

UVM (n=1209)  
 i-tRF & exclusive (n=275)  
 3' terminus relative to 3' stem of A-loop (n=81)

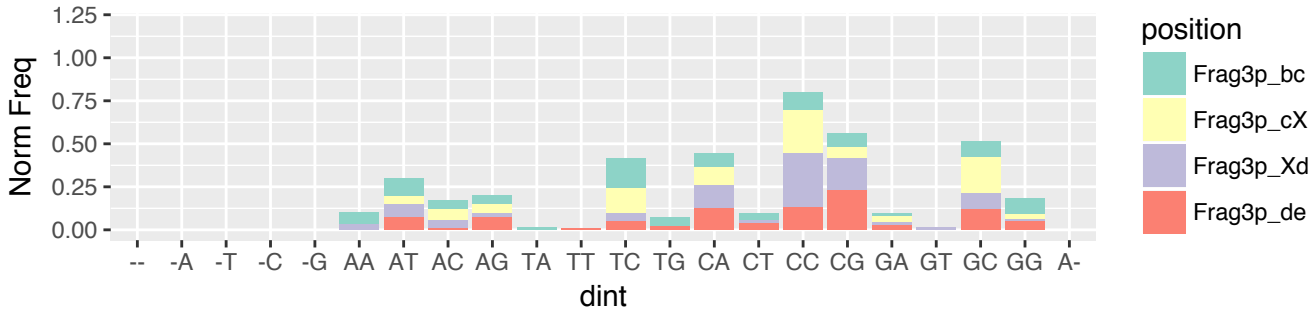

UVM (n=1209)  
 i-tRF & exclusive (n=275)  
 3' terminus relative to 3' stem of A-loop (n=81)

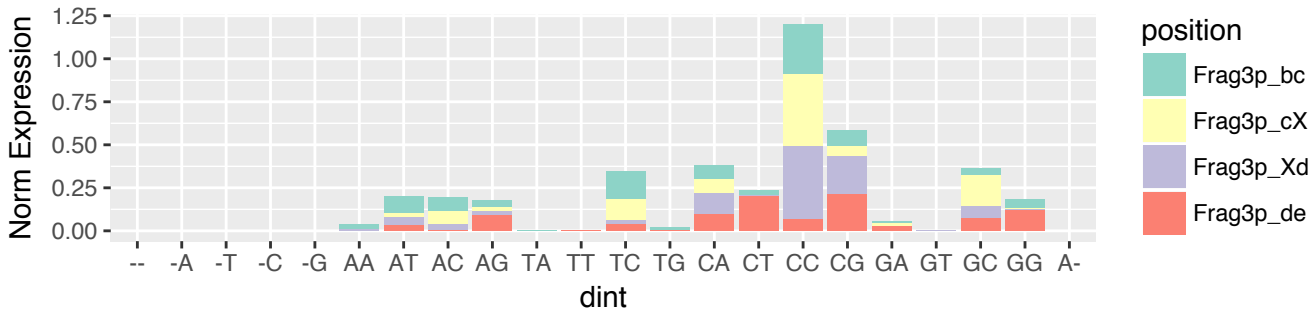

UVM (n=1209)  
 i-tRF & exclusive (n=275)  
 3' terminus relative to 5' stem of T-loop (n=83)

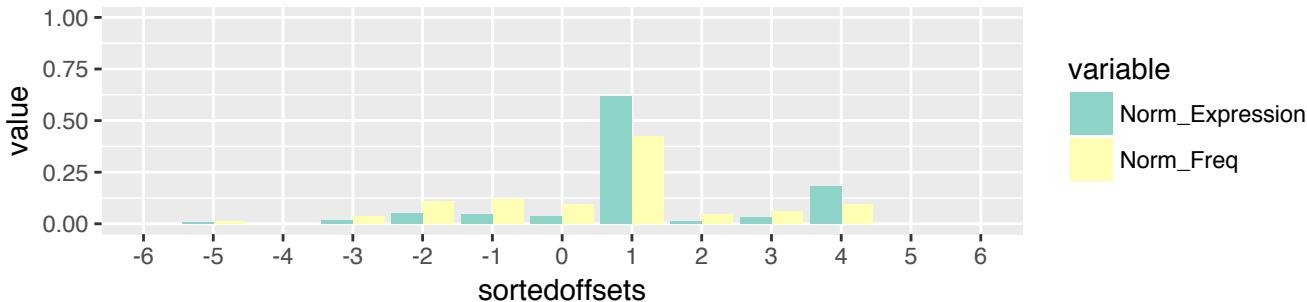

UVM (n=1209)  
 i-tRF & exclusive (n=275)  
 3' terminus relative to 5' stem of T-loop (n=83)

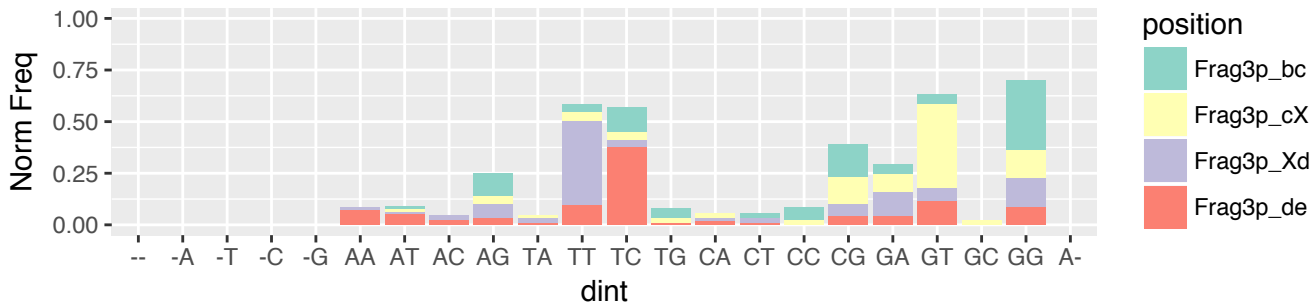

UVM (n=1209)  
 i-tRF & exclusive (n=275)  
 3' terminus relative to 5' stem of T-loop (n=83)

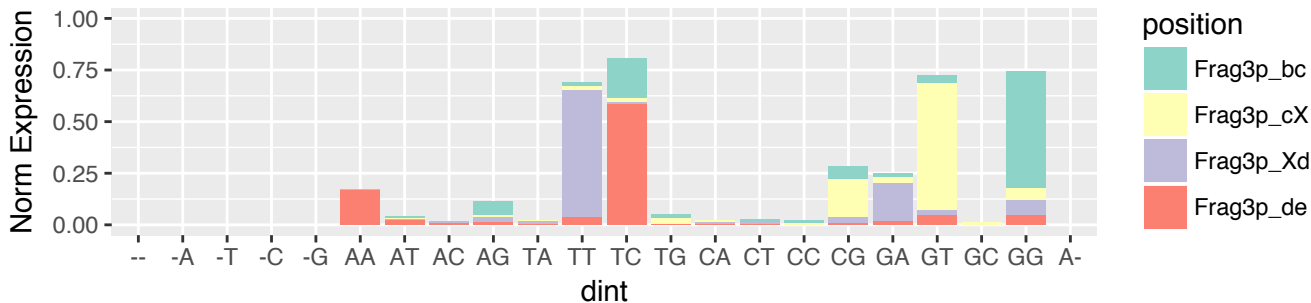

UVM (n=1209)  
 i-tRF & exclusive (n=275)  
 3' terminus relative to 3' stem of T-loop (n=52)

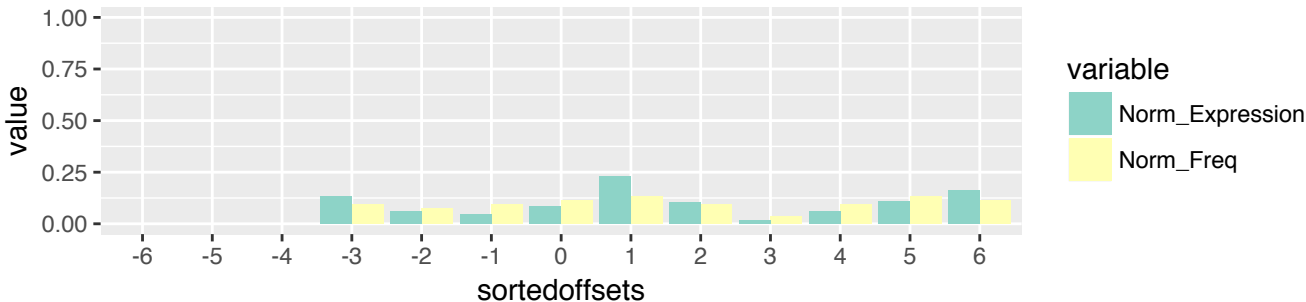

UVM (n=1209)  
 i-tRF & exclusive (n=275)  
 3' terminus relative to 3' stem of T-loop (n=52)

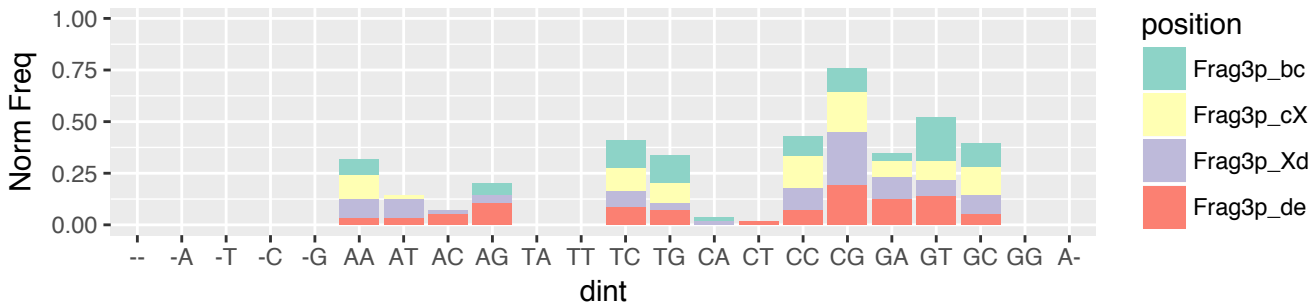

UVM (n=1209)  
 i-tRF & exclusive (n=275)  
 3' terminus relative to 3' stem of T-loop (n=52)

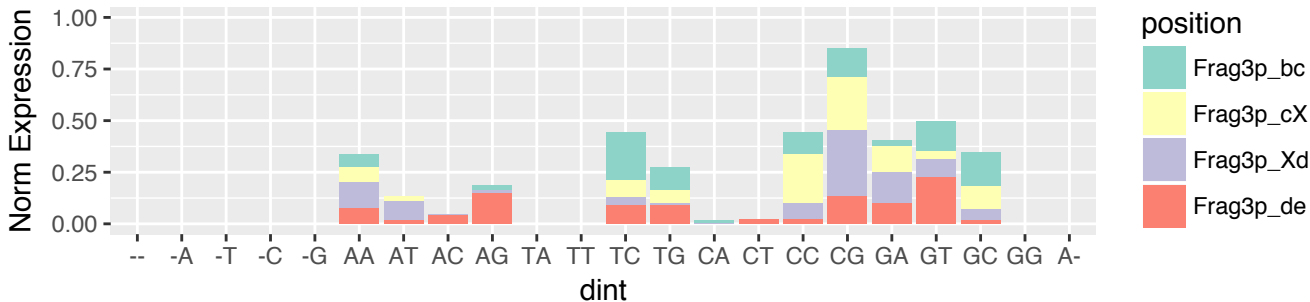

UVM (n=1209)  
 i-tRF & exclusive (n=275)  
 3' terminus relative to 3' end of the tRNA (n=17)

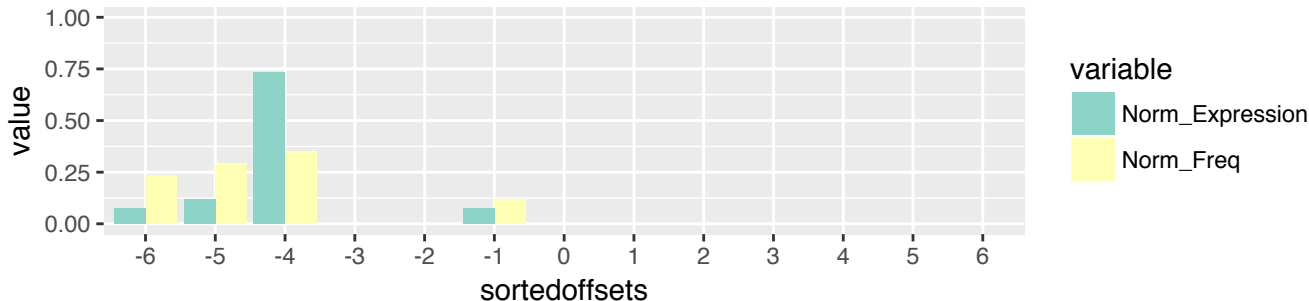

UVM (n=1209)  
 i-tRF & exclusive (n=275)  
 3' terminus relative to 3' end of the tRNA (n=17)

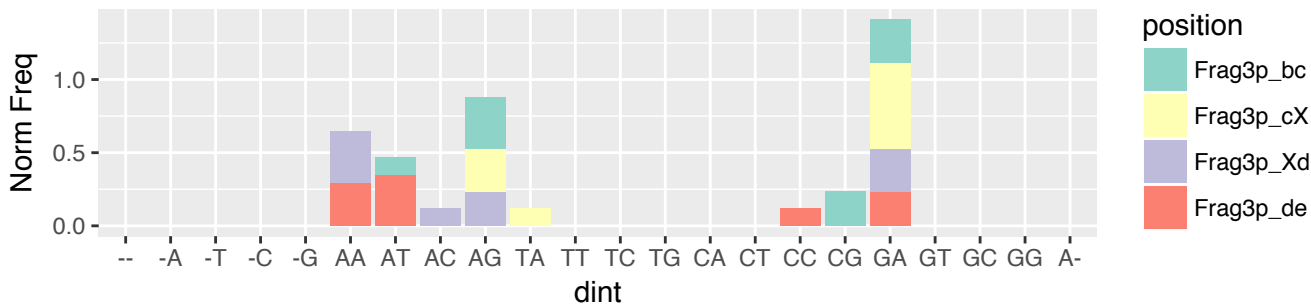

UVM (n=1209)  
 i-tRF & exclusive (n=275)  
 3' terminus relative to 3' end of the tRNA (n=17)

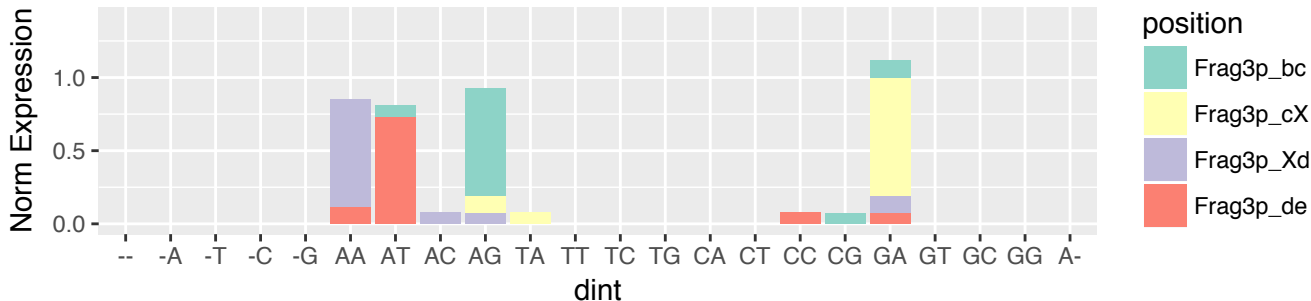

UVM (n=1209)  
3'-tRF & exclusive (n=283)  
5' terminus relative to 3' stem of A-loop (n=1)



UVM (n=1209)  
3'-tRF & exclusive (n=283)  
5' terminus relative to 3' stem of A-loop (n=1)

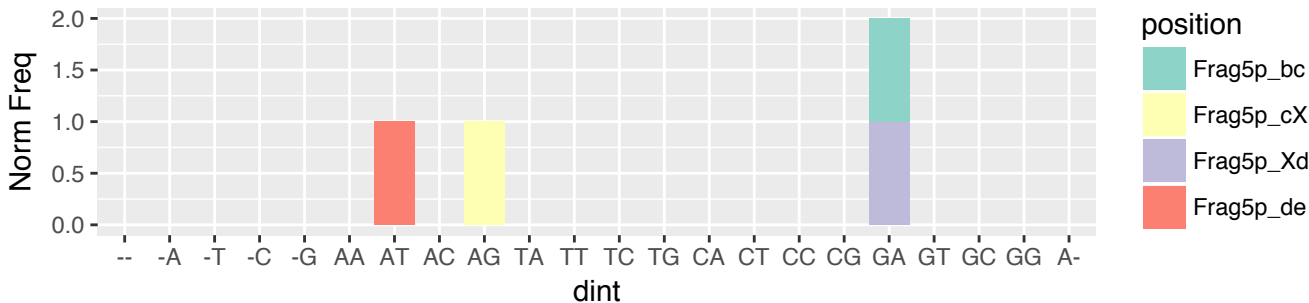

UVM (n=1209)  
3'-tRF & exclusive (n=283)  
5' terminus relative to 3' stem of A-loop (n=1)

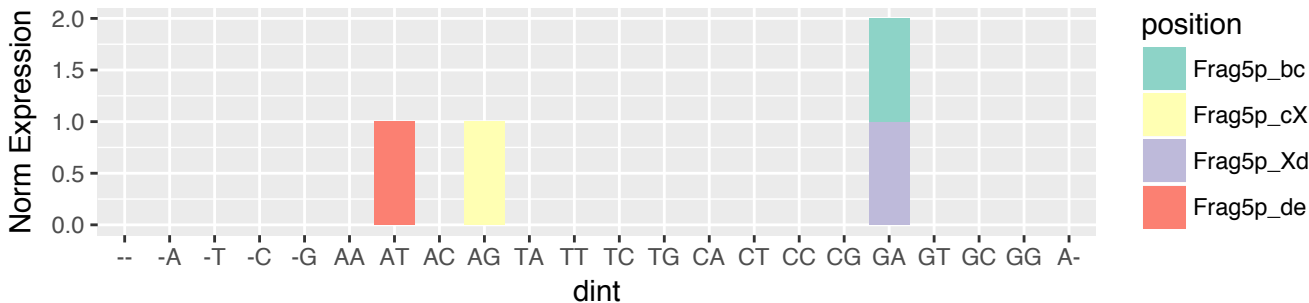

UVM (n=1209)  
 3'-tRF & exclusive (n=283)  
 5' terminus relative to 5' stem of T-loop (n=211)

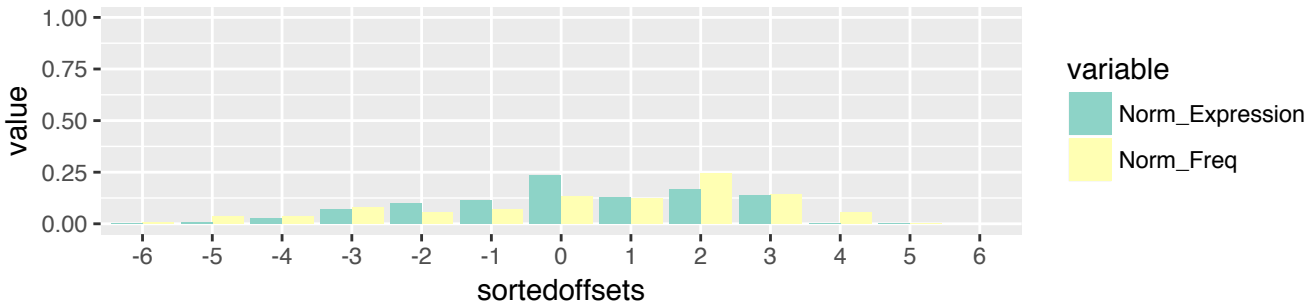

UVM (n=1209)  
 3'-tRF & exclusive (n=283)  
 5' terminus relative to 5' stem of T-loop (n=211)

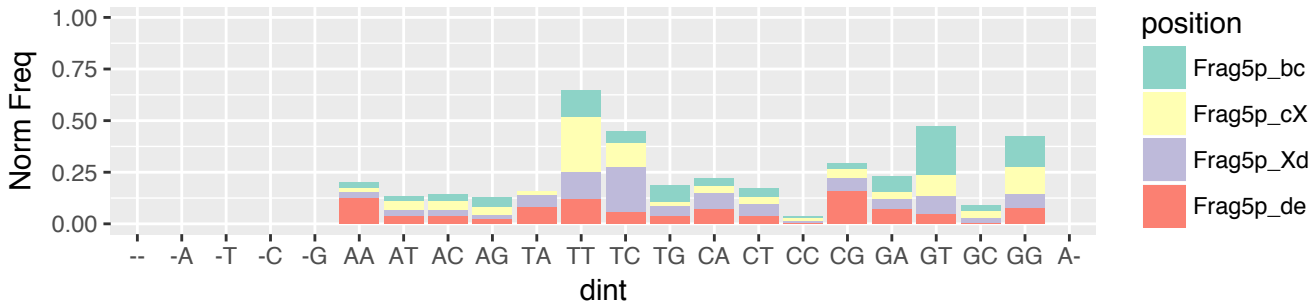

UVM (n=1209)  
 3'-tRF & exclusive (n=283)  
 5' terminus relative to 5' stem of T-loop (n=211)

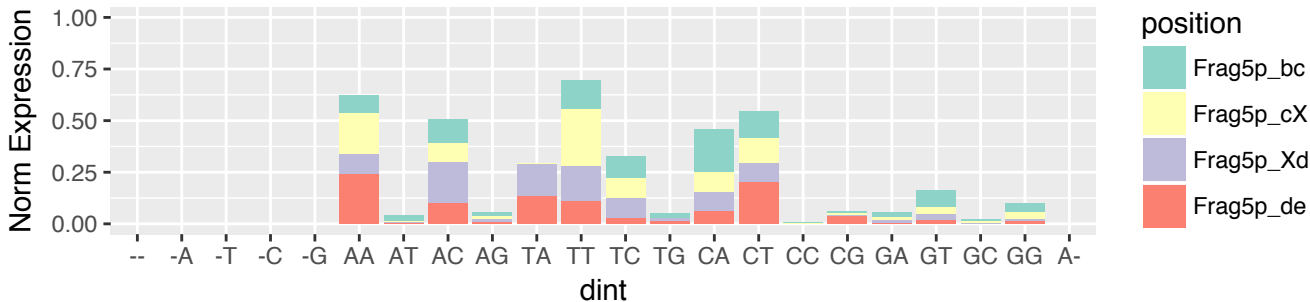



UVM (n=1209)  
 3'-tRF & exclusive (n=283)  
 5' terminus relative to 3' stem of T-loop (n=71)

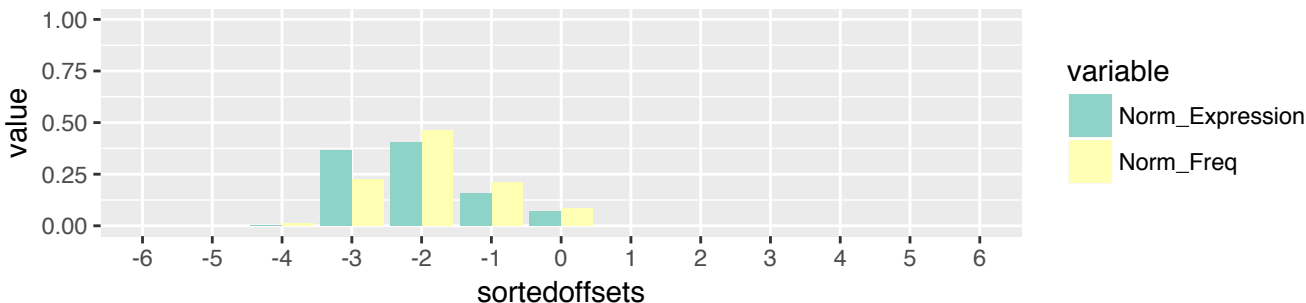

UVM (n=1209)  
 3'-tRF & exclusive (n=283)  
 5' terminus relative to 3' stem of T-loop (n=71)

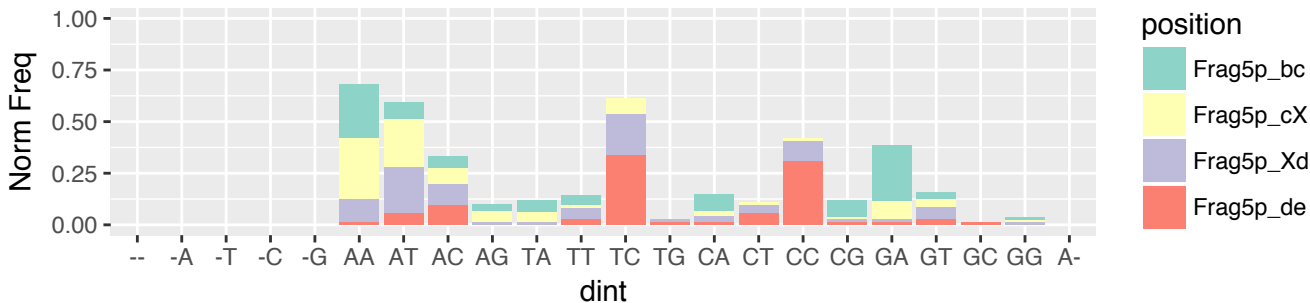

UVM (n=1209)  
 3'-tRF & exclusive (n=283)  
 5' terminus relative to 3' stem of T-loop (n=71)

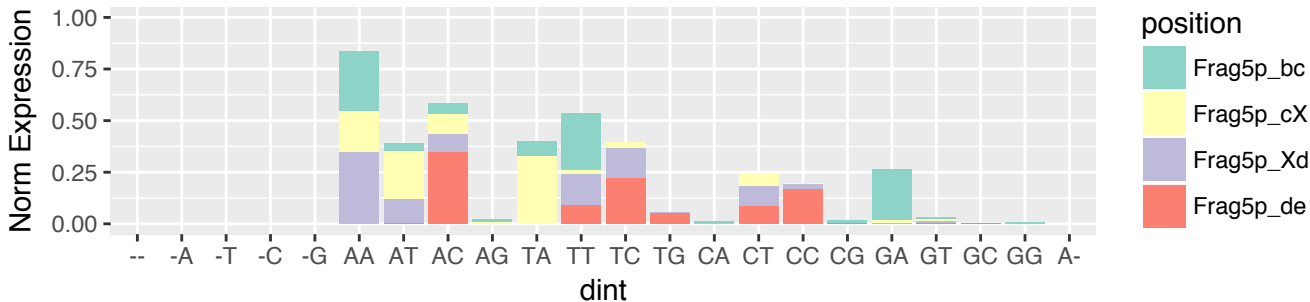

UVM (n=1209)  
 3'-tRF & exclusive (n=283)  
 3' terminus relative to 3' end of the tRNA (n=283)

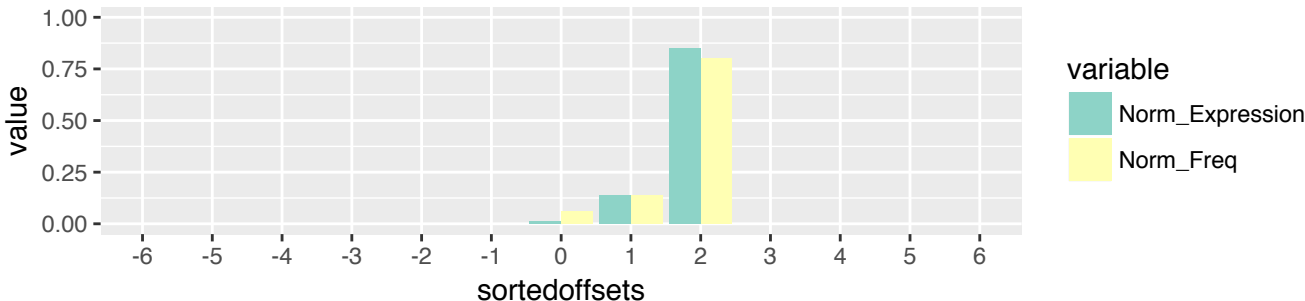

UVM (n=1209)  
 3'-tRF & exclusive (n=283)  
 3' terminus relative to 3' end of the tRNA (n=283)

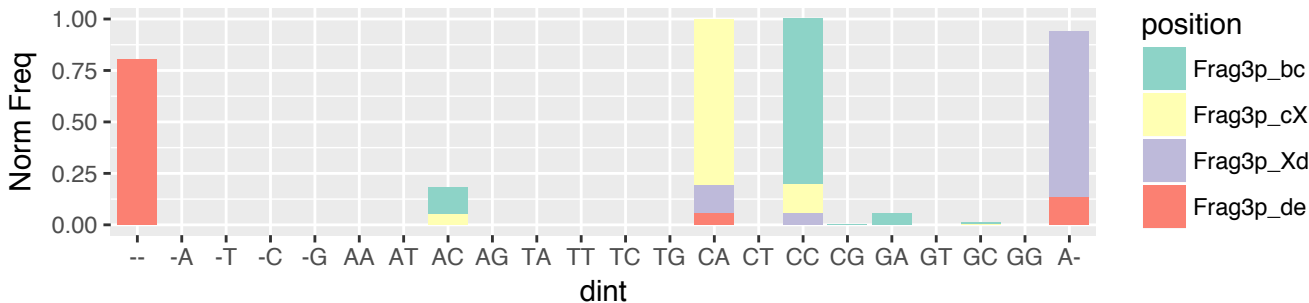

UVM (n=1209)  
 3'-tRF & exclusive (n=283)  
 3' terminus relative to 3' end of the tRNA (n=283)

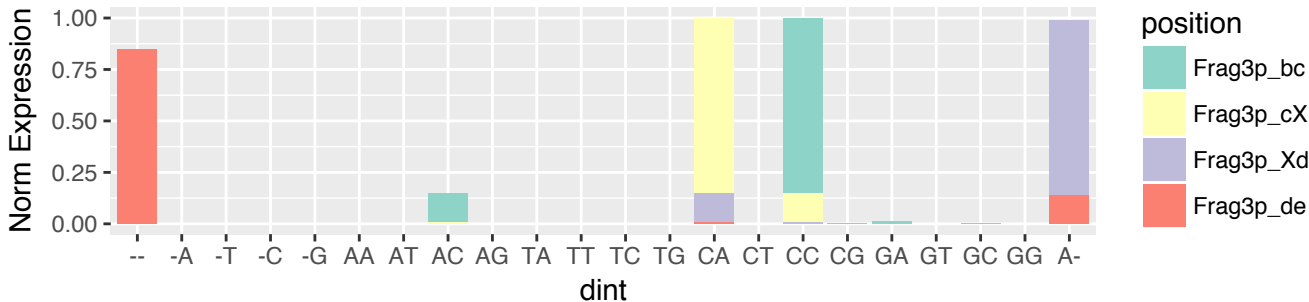

**Supplemental Fig. S4.** Plots showing how the endpoints of the tRFs we discovered across the TCGA samples are distributed along the length of mature tRNAs. The results are shown separately for each tRF structural category. The plots also show the results for the tRFs' 5' and 3' termini separately. Each plot shows the relative position of the tRFs with regard to recognizable landmarks along the mature tRNA including: its 5' terminus; the 5' end of the D-loop; the 3' end of the D-loop; the 5' end of the A-loop; the 3' end of the A-loop; the 5' end of the T-loop; the 3' end of the T-loop; and, the mature tRNA's 3' terminus. In each case, we additionally report the dinucleotide composition of the mature tRNA at the position at hand. In all cases, we list two plots: one plot considers the normalized abundance of the tRFs; the second plot considers the diversity of the tRFs independent of their abundance. The plots are shown separately for each of 32 TCGA cancer types.

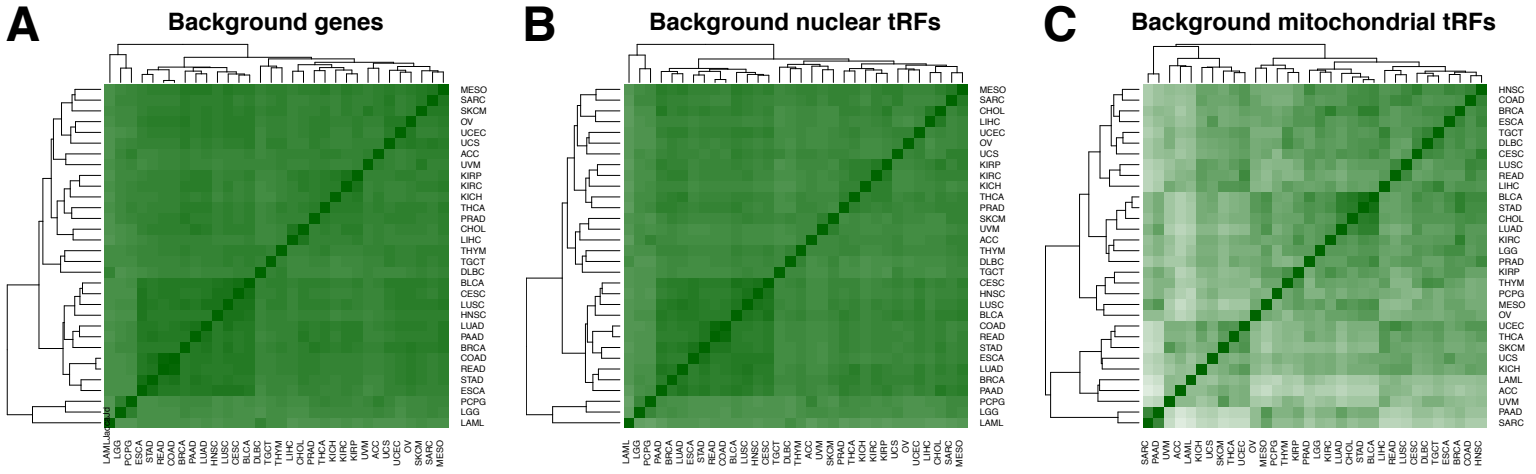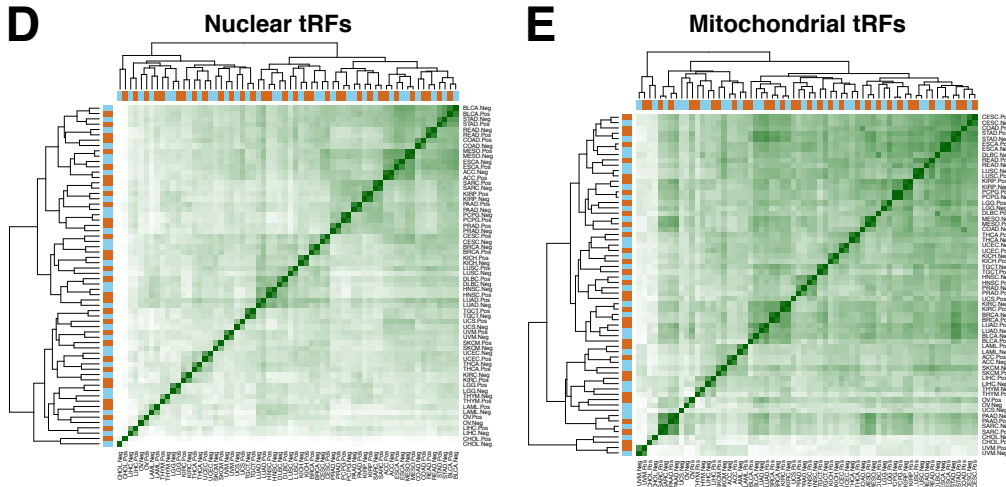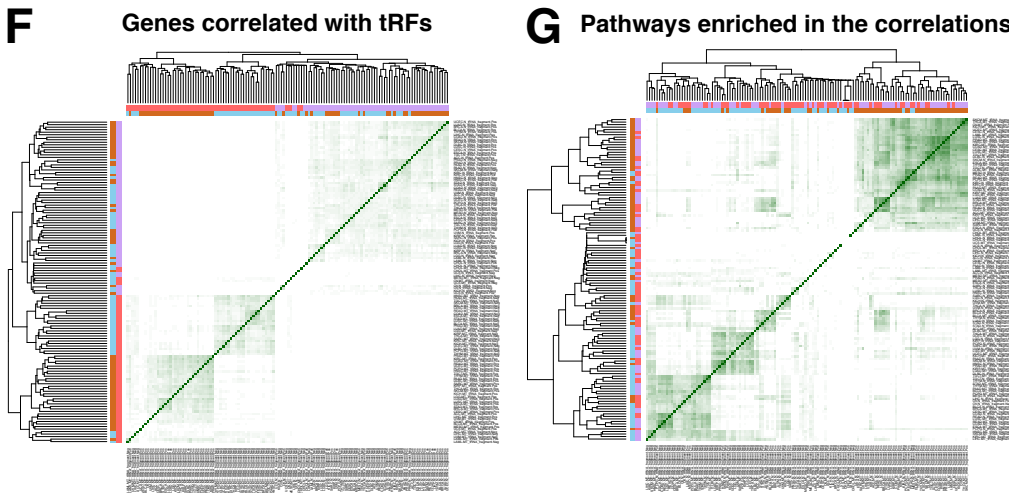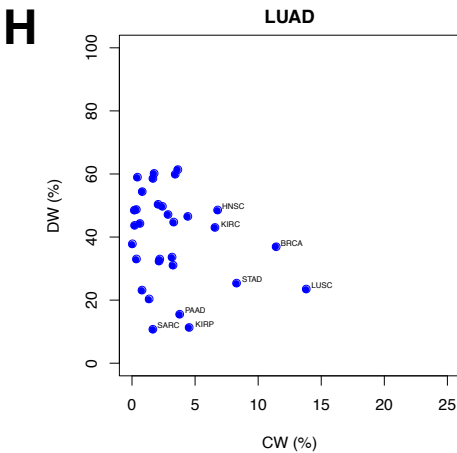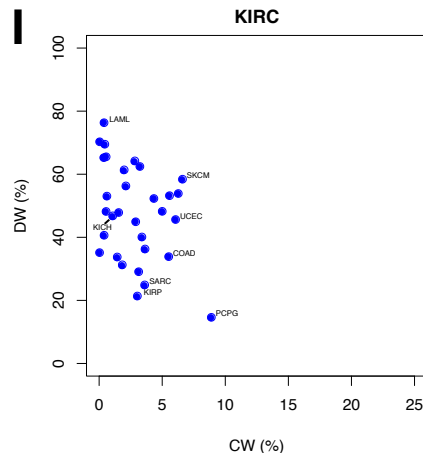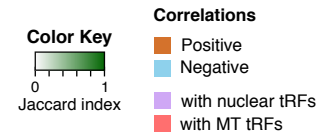

**Supplemental Fig. S5.** (A-G) Heatmaps and hierarchical clustering (metric: Euclidean distance) of Jaccard indices among cancer types. (A-C) Jaccard indices of the background mRNAs (A), nuclear tRFs (B), and mitochondrial tRFs (C), i.e. the transcripts that participate in the tRF-mRNA correlations that are part of our analyses. Note that in almost all cases, the Jaccard indices are high. (D-G) Jaccard indices of the nuclear tRFs (D), mitochondrial tRFs (E), mRNAs that participated in the significant correlations (F), and the pathways enriched in each correlation group (G). Note how much lower the Jaccard indices are when compared to the background ones in panels A through C. For (F), the mRNAs that participated in correlations in the same cancer type were considered separately, e.g. ‘OV.N\_tRNA\_fragment.Pos’ captures the set of genes that were positively correlated with nuclear tRFs in ovarian cancer. Note the tendency of clustering based on the origin of tRF that the mRNAs are correlated with but the high distances among them (dendrogram heights). (H-I) Percentage of tRF-mRNA pairs that are commonly- and differentially-correlated, respectively, in the rest of the cancer types with reference to LUAD (H) and KIRC (I). The fewer differential correlations and the more common correlations exist between two cancer types, the more *similar* their underlying molecular biology is. LUSC’s comparative closeness to LUAD suggests that there is a modest tissue-specific contribution to the observed correlations.

**ACC**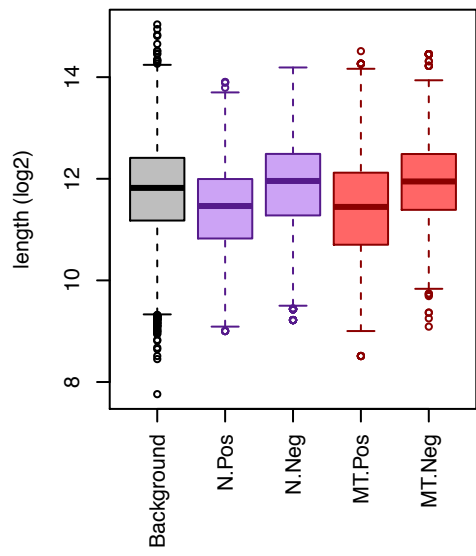**BLCA**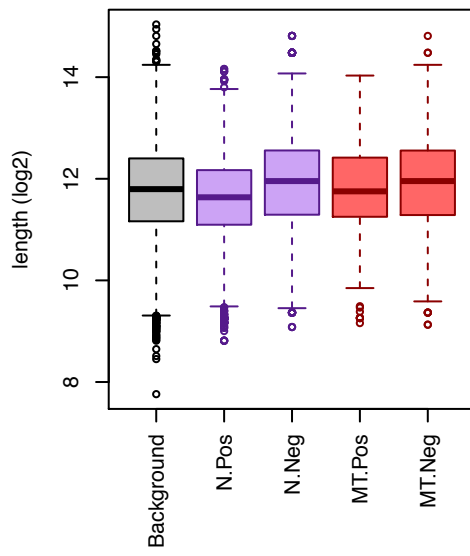**BRCA**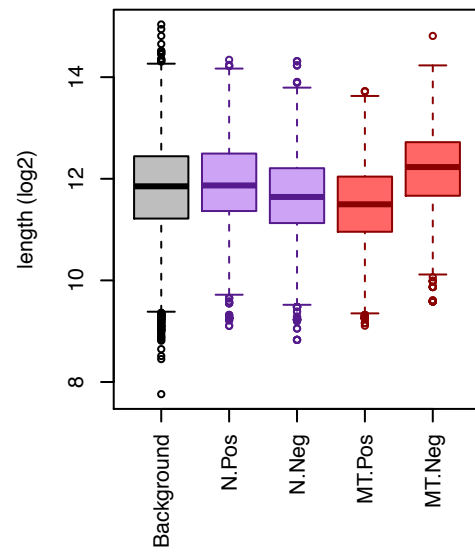**CESC**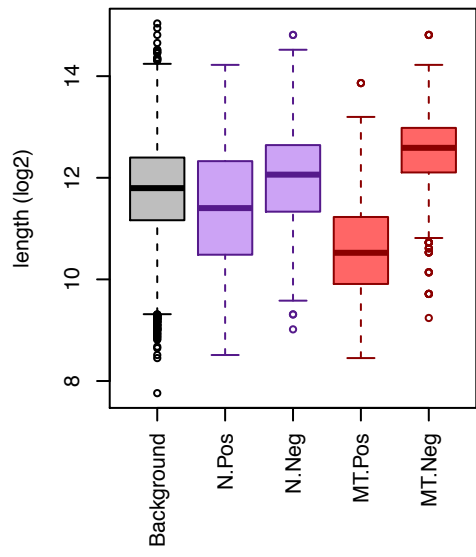**CHOL**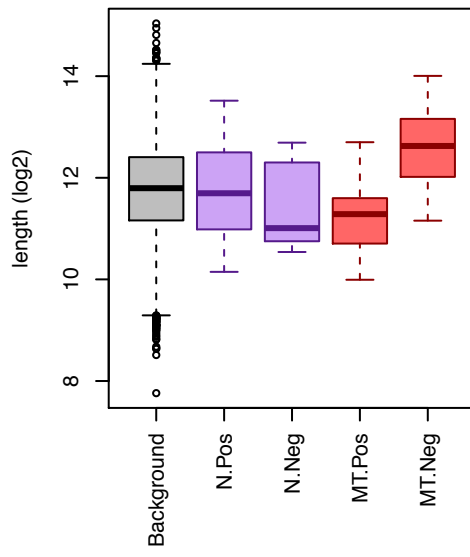**COAD**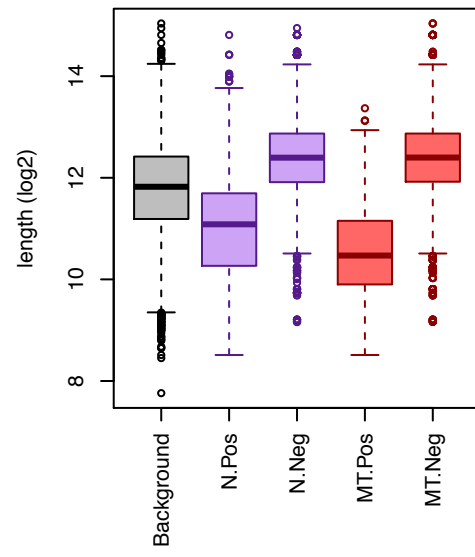**DLBC**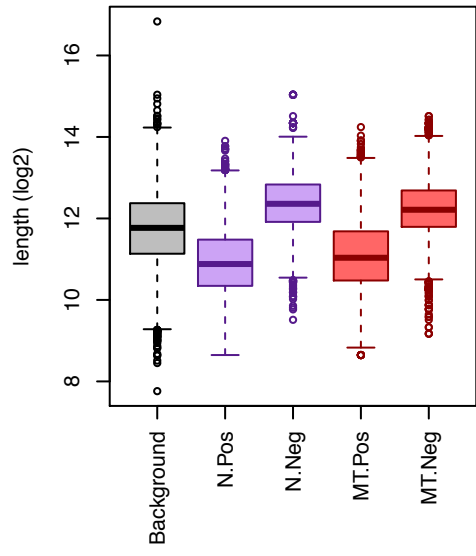**ESCA**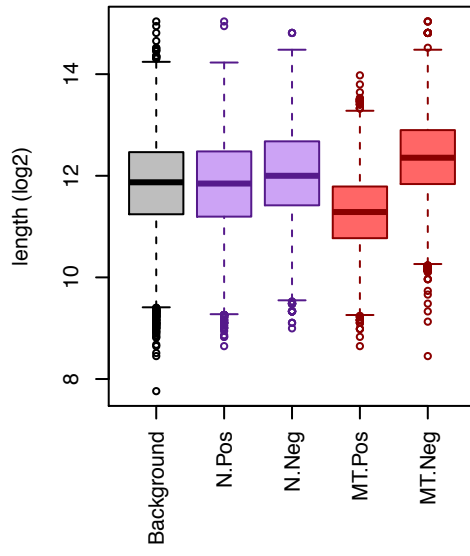**HNSC**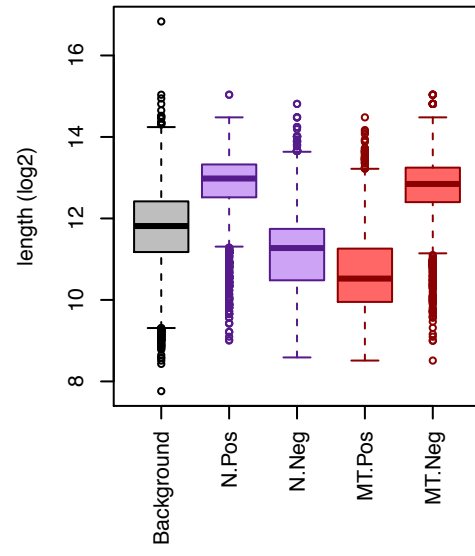

**KICH**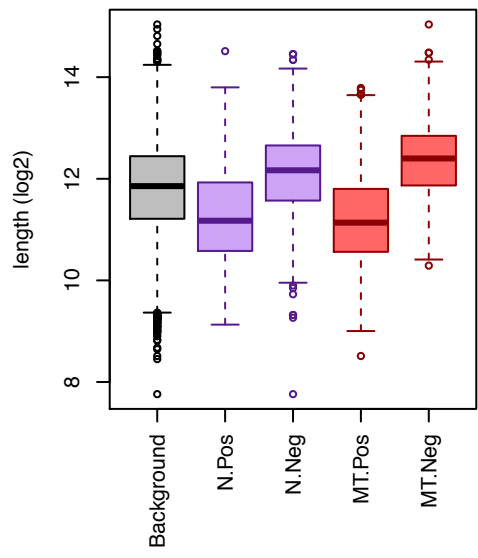**KIRC**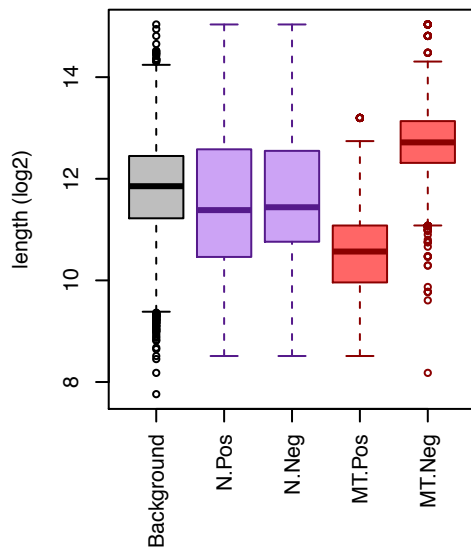**KIRP**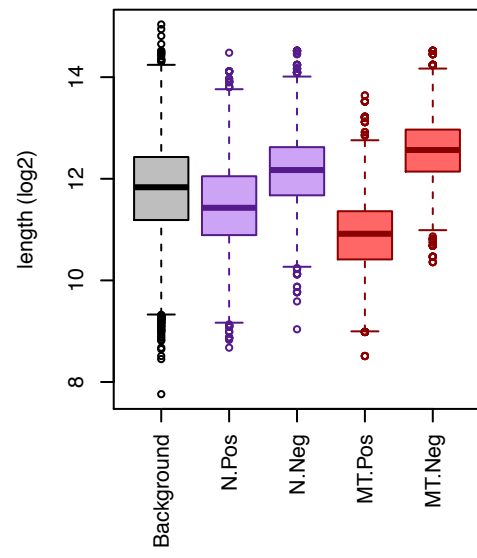**LAML**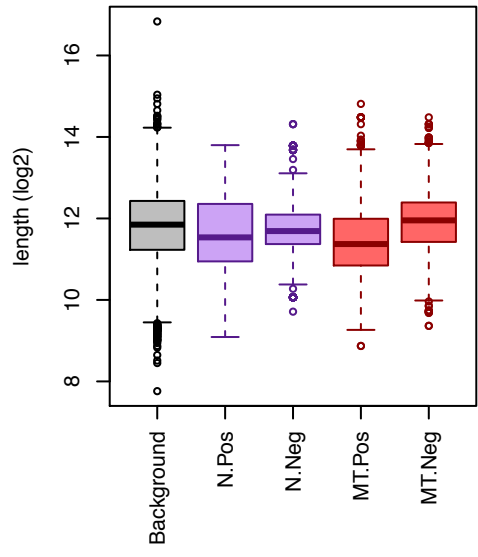**LGG**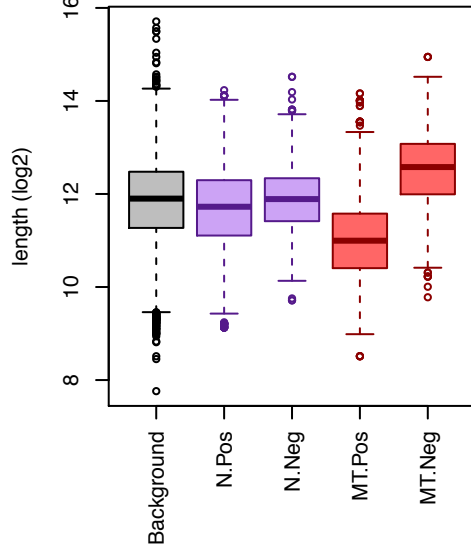**LIHC**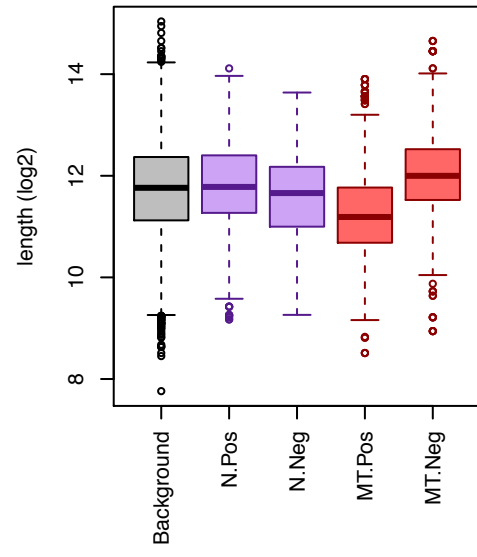**LUAD**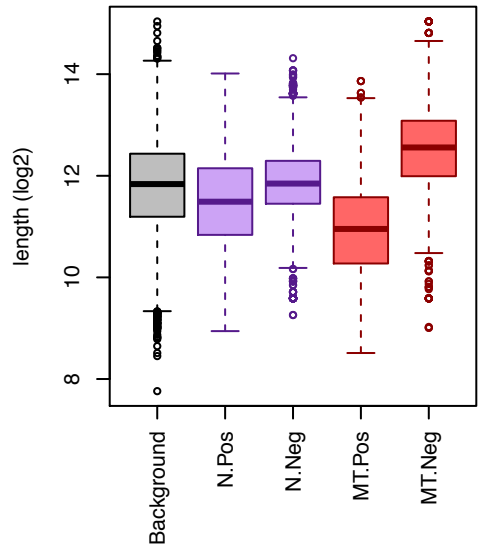**LUSC**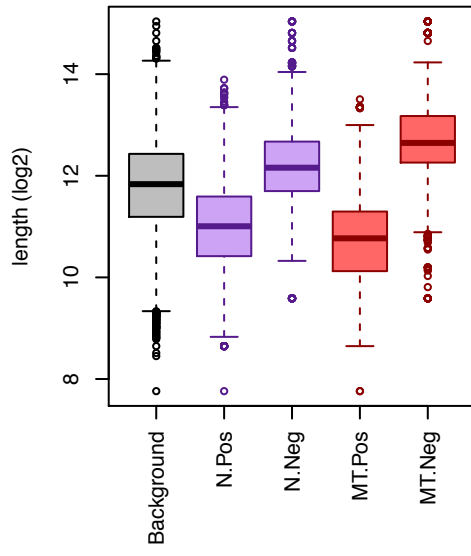**MESO**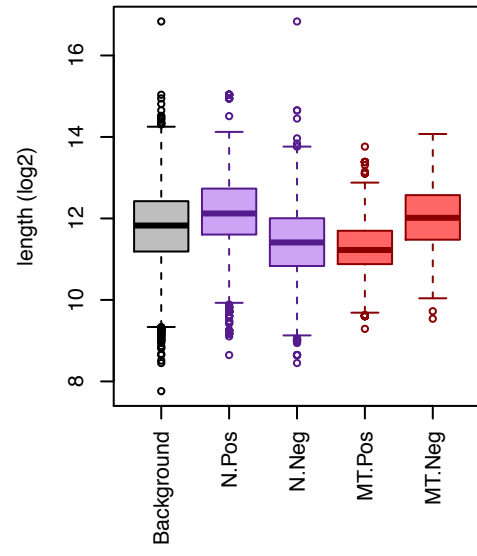

**OV**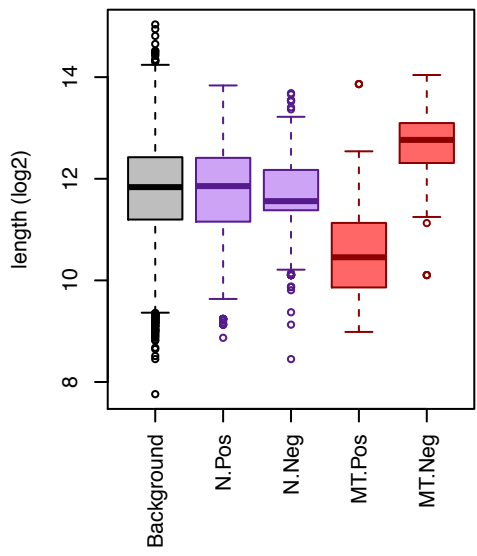**PAAD**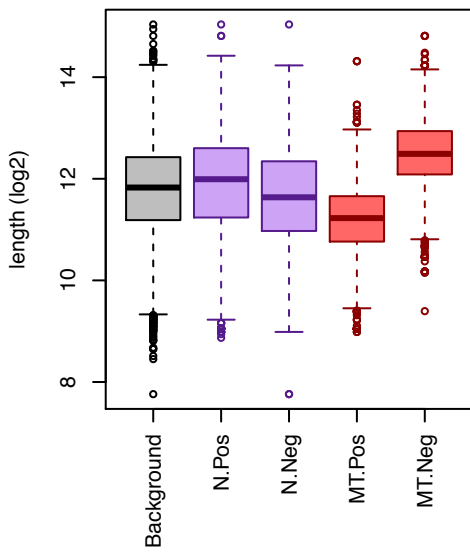**PCPG**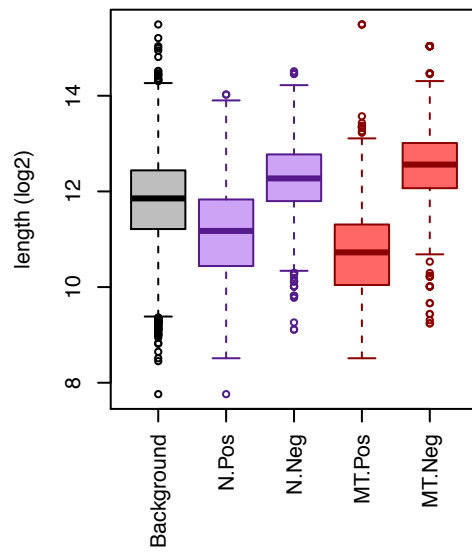**PRAD**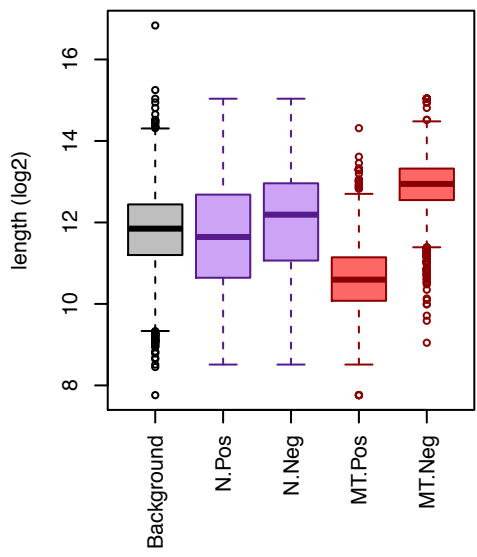**READ**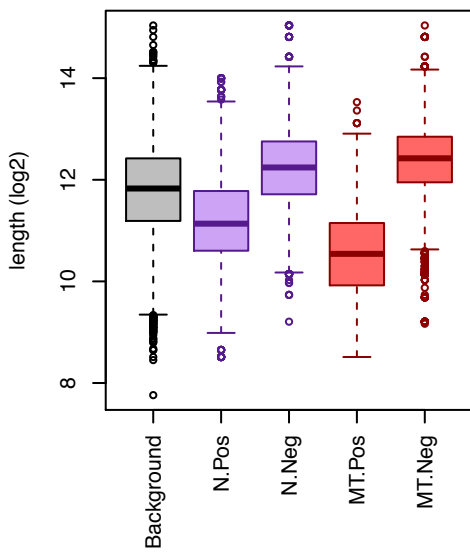**SARC**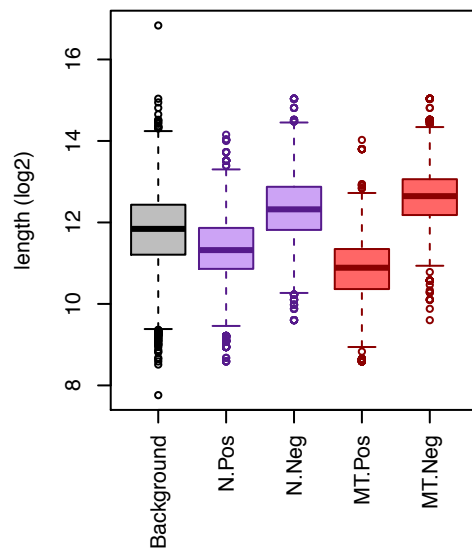**SKCM**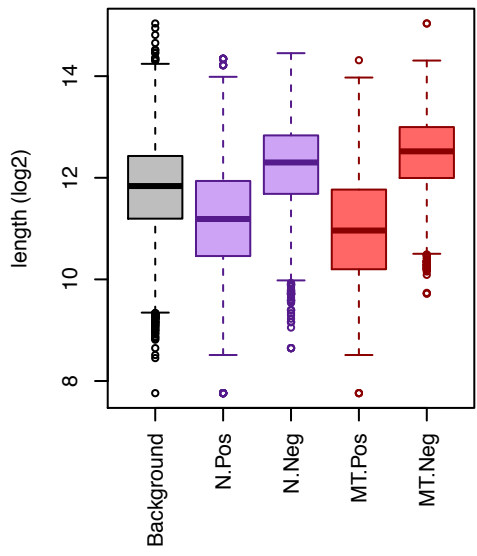**STAD**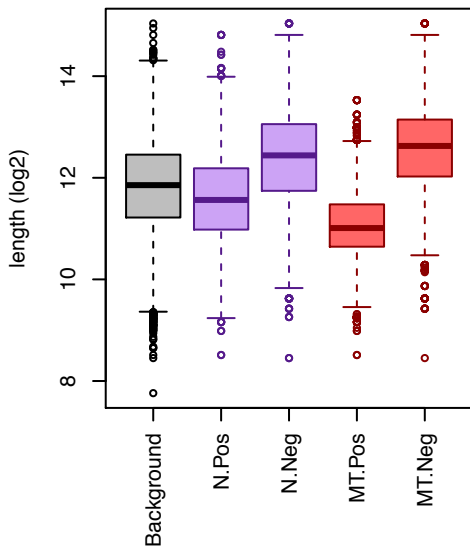**TGCT**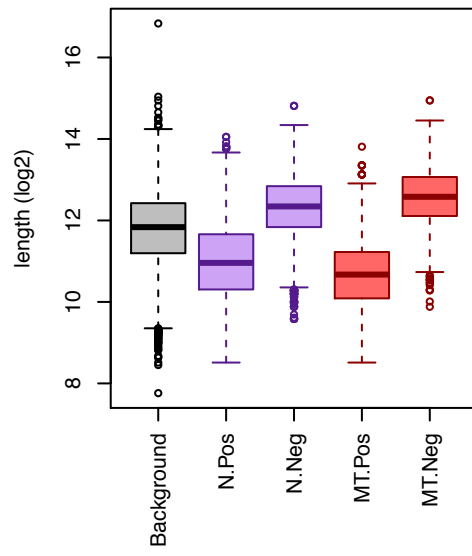



**THCA**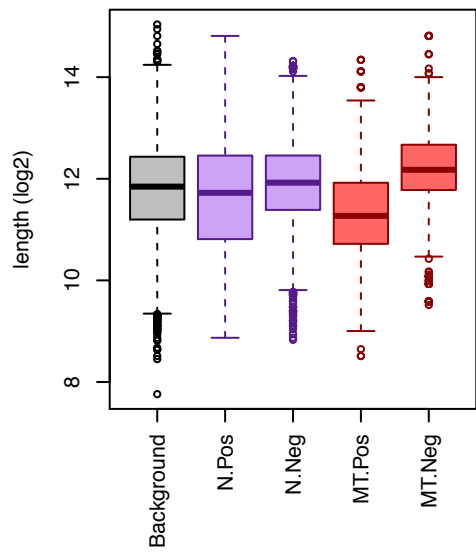**THYM**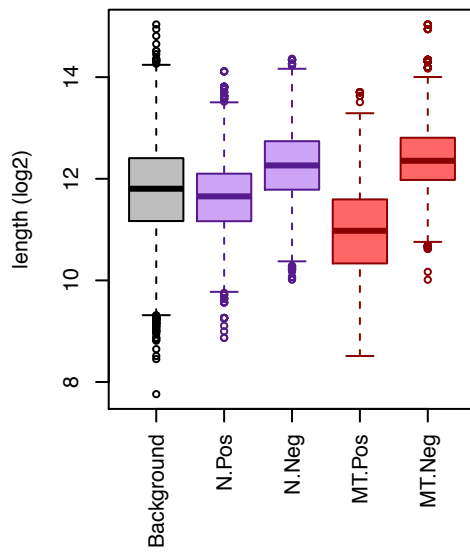**UCEC**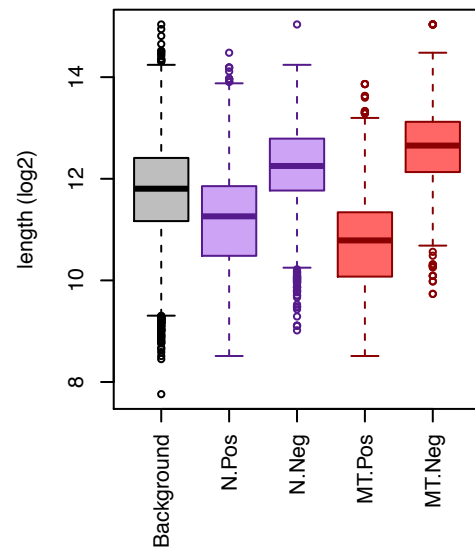**UCS**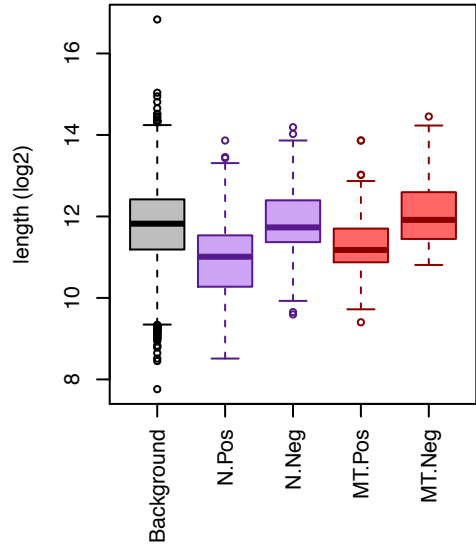**UVM**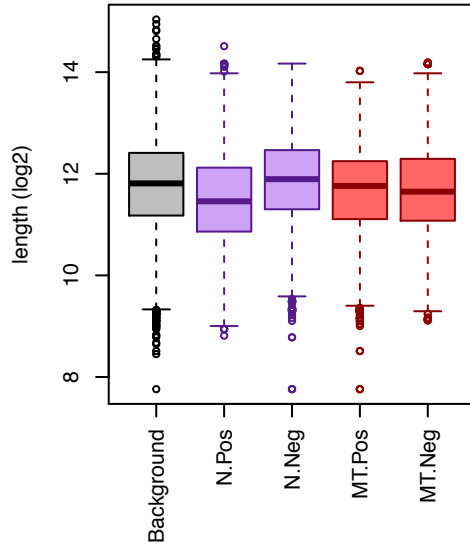

**Supplemental Fig. S6.** Boxplots showing the distributions of mRNA lengths in the background (expressed mRNAs) and in the mRNAs that are correlated positively (Pos) or negatively (Neg) with nuclear (N) or mitochondrial (MT) tRFs.

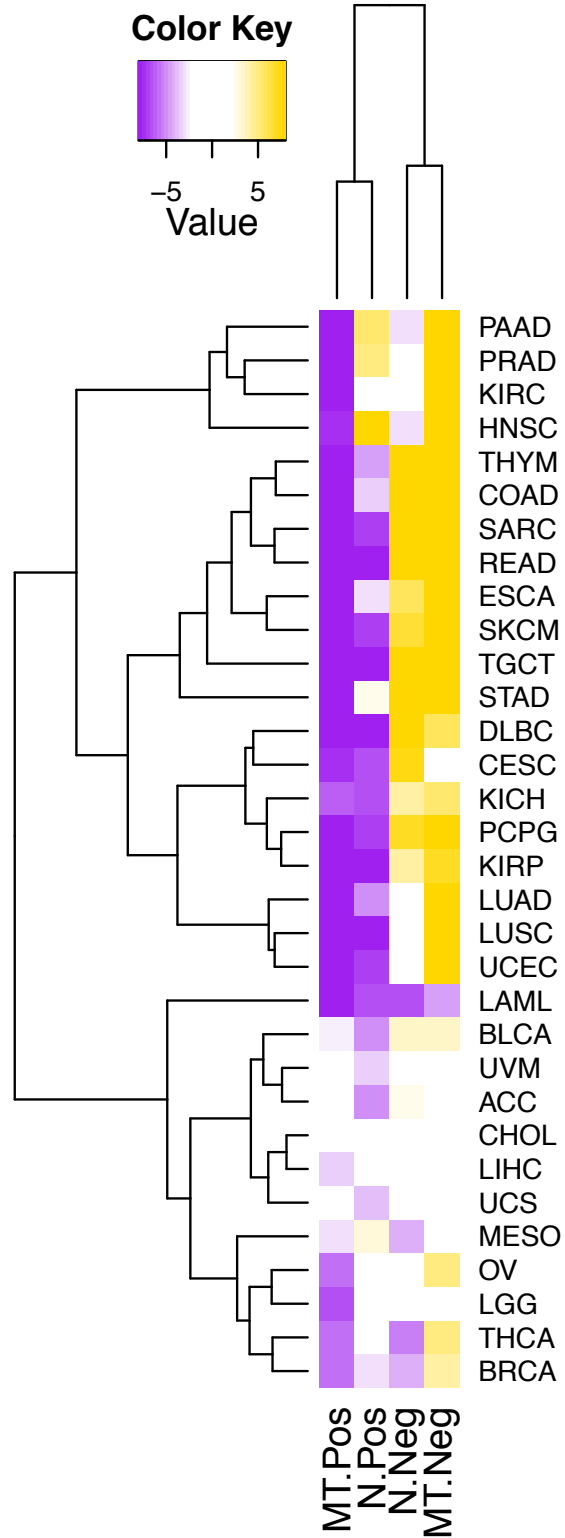

**Supplemental Fig. S7.** Heatmap and hierarchical clustering (metric: Euclidean distance) of the Z-scores of mean intronic length for mRNAs participating in tRF-mRNA correlations, compared to the observed length distribution of the transcribed mRNAs. Purple color indicates statistically significant depletion whereas gold means statistically-significant enrichment.

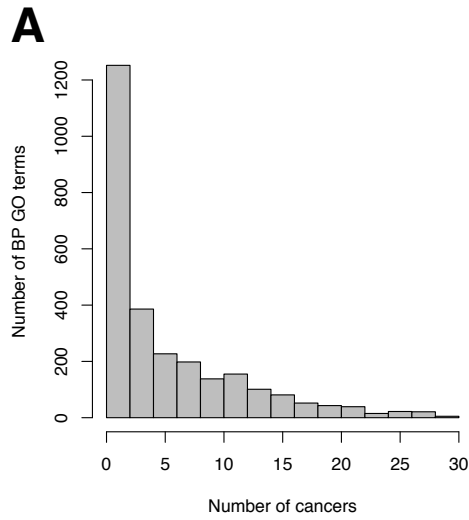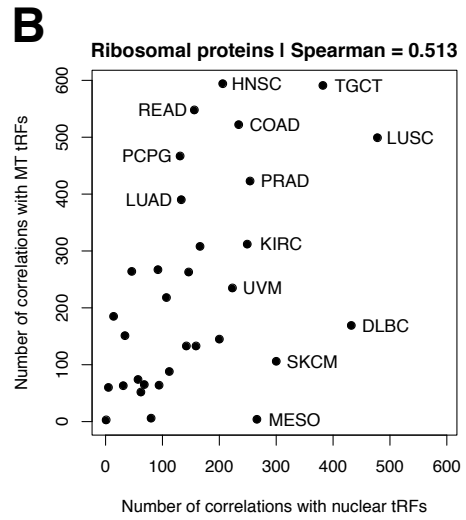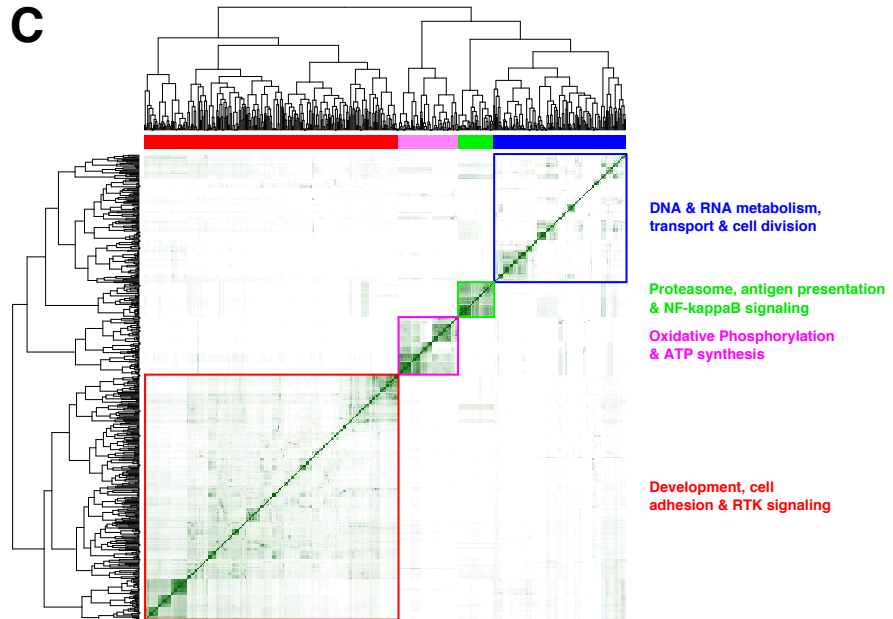

**Supplemental Fig. S8.** (A) Distribution of the enriched GO Biological Process (BP) terms across cancer types. Note that while most terms are enriched in a few cancer types only there are several terms that are enriched and recur in multiple cancers. (B) Number of correlations with nuclear and MT tRFs for ribosomal proteins. (G) Jaccard indices of the GO BP terms enriched in the gene sets with which the nuclear and MT tRFs are correlated. We included terms that are enriched in more than 10 cancer types. Despite the relatively low Jaccard indices, the clustering based on the type of the correlated non-coding RNA is more evident. This indicates that although there is considerable variation at the *gene level* across cancer types, at the *pathway level* tRFs control similar processes (as compared to Fig. S3G).

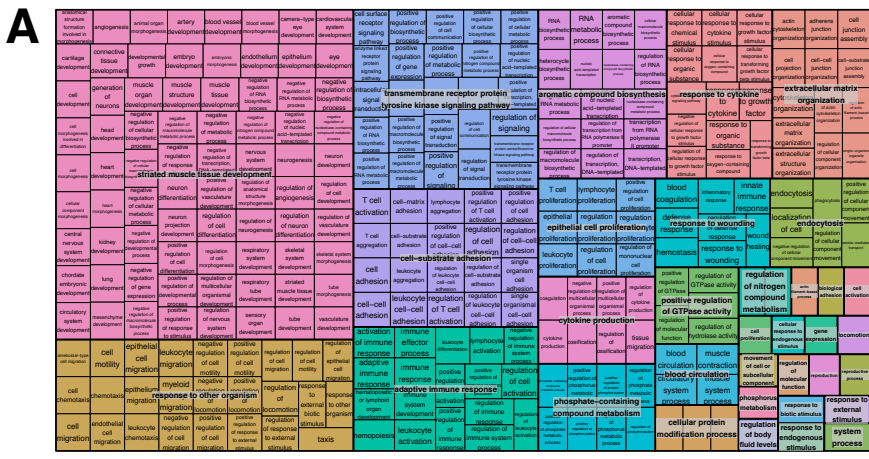

**Development, cell adhesion & RTK signaling**

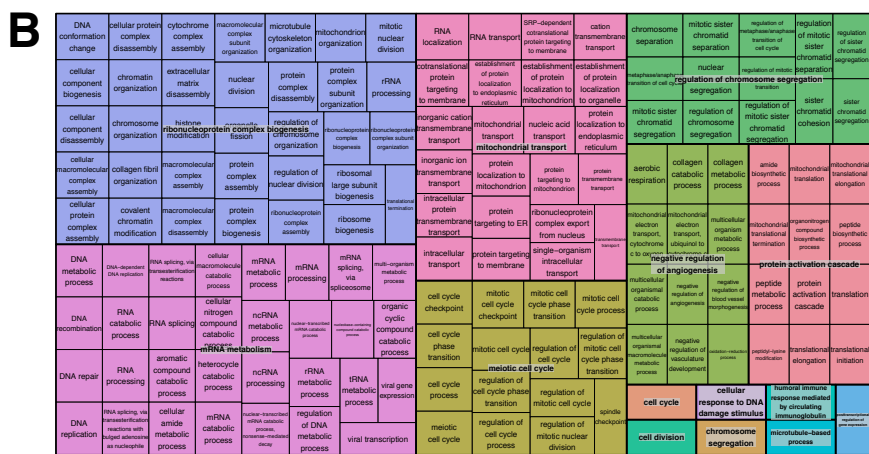

**DNA & RNA metabolism & transport and cell division**

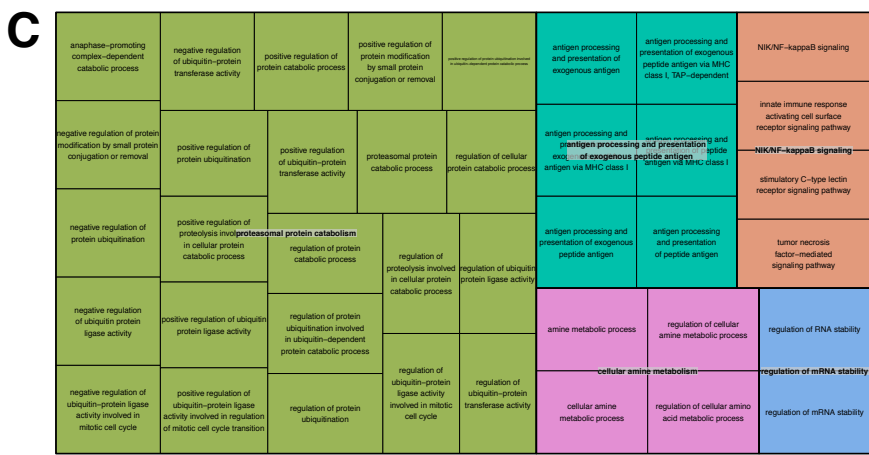

**Proteasome, antigen presentation & NF-kappaB signaling**

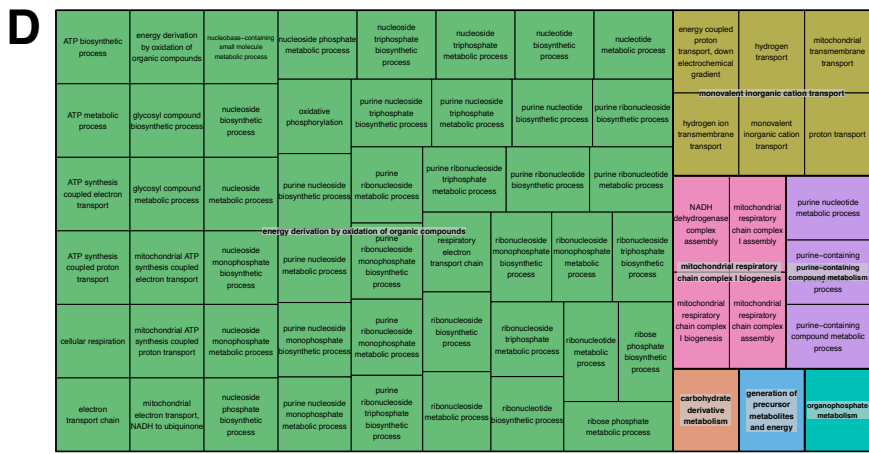

**Oxidative phosphorylation & ATP synthesis**

**Supplemental Fig. S9.** (A-D) Tree-maps as produced from the REVIGO analysis for each of the GO clusters of Supplemental Fig. S8C. The names of each of the four groups, also shown in Fig. 4B, were selected from among the most representative groups defined in the above maps.

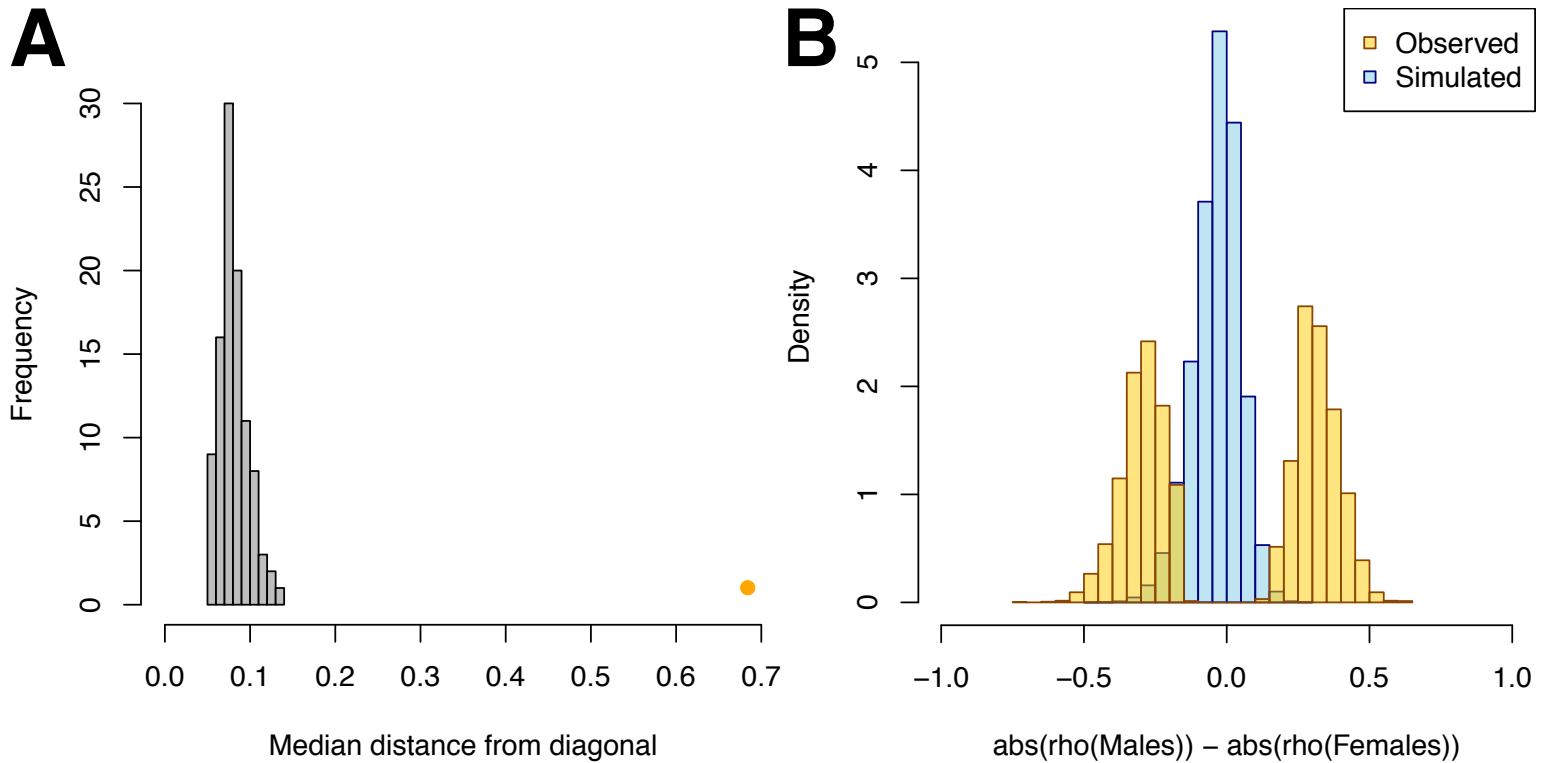

**Supplemental Fig. S10.** Monte Carlo simulations – sex disparities in BLCA. (A) The expected distribution of the median distance of the isoacceptors from the diagonal of Fig. 6A. The orange dot at the bottom right represents the median distance that is actually observed (Fig. 6A). Compared to the expected distribution, its Z-Score is  $> +20$ . The simulation comprised  $n=100$  iterations. (B) Distribution of the expected difference (cyan bars) in the correlation coefficients obtained following a Monte Carlo simulation where we shuffled the expression values of tRFs and mRNAs. For comparison purposes, we include the actual distribution of differences in the coefficients as is calculated between male and female subjects in BLCA (gold bars).
